# Supplementary material for: First and Second Dissociation Enthalpies in Bi-Component Crystals Consisting of Maleic Acid and L-Phenylalanine
Source: MDPI journal article supplement (doi:10.3390/molecules26185714), 2021-09-21

---

The following ALERTS were generated. Each ALERT has the format

**test-name\_ALERT\_alert-type\_alert-level.**

Click on the hyperlinks for more details of the test.

---

### Alert level A

PLAT355\_ALERT\_3\_A Long O-H (X0.82,N0.98A) O6 - H6O . 1.15 Ang.

---

### Alert level C

ABSTY02\_ALERT\_1\_C An \_exptl\_absorpt\_correction\_type has been given without  
a literature citation. This should be contained in the  
\_exptl\_absorpt\_process\_details field.

Absorption correction given as multi-scan

STRVA01\_ALERT\_4\_C Flack test results are ambiguous.

From the CIF: \_refine\_ls\_abs\_structure\_Flack 0.400

From the CIF: \_refine\_ls\_abs\_structure\_Flack\_su 0.200

PLAT250\_ALERT\_2\_C Large U3/U1 Ratio for Average U(i,j) Tensor .... 2.2 Note

PLAT340\_ALERT\_3\_C Low Bond Precision on C-C Bonds ..... 0.00471 Ang.

PLAT911\_ALERT\_3\_C Missing FCF Refl Between Thmin & Sth/L= 0.600 66 Report

PLAT913\_ALERT\_3\_C Missing # of Very Strong Reflections in FCF .... 42 Note

---

### Alert level G

PLAT019\_ALERT\_1\_G \_diffn\_measured\_fraction\_theta\_full/\*\_max < 1.0 0.997 Report

PLAT063\_ALERT\_4\_G Crystal Size Possibly too Large for Beam Size .. 0.80 mm

PLAT199\_ALERT\_1\_G Reported \_cell\_measurement\_temperature ..... (K) 293 Check

PLAT200\_ALERT\_1\_G Reported \_diffn\_ambient\_temperature ..... (K) 293 Check

PLAT303\_ALERT\_2\_G Full Occupancy Atom H2O with # Connections 2.00 Check

PLAT720\_ALERT\_4\_G Number of Unusual/Non-Standard Labels ..... 6 Note

PLAT791\_ALERT\_4\_G Model has Chirality at C12 (Sohnke SpGr) S Verify

PLAT791\_ALERT\_4\_G Model has Chirality at C15 (Sohnke SpGr) S Verify

PLAT883\_ALERT\_1\_G No Info/Value for \_atom\_sites\_solution\_primary . Please Do !

PLAT910\_ALERT\_3\_G Missing # of FCF Reflection(s) Below Theta(Min). 3 Note

PLAT912\_ALERT\_4\_G Missing # of FCF Reflections Above Sth/L= 0.600 3 Note

PLAT933\_ALERT\_2\_G Number of OMIT Records in Embedded .res File ... 2 Note

PLAT961\_ALERT\_5\_G Dataset Contains no Negative Intensities ..... Please Check

PLAT978\_ALERT\_2\_G Number C-C Bonds with Positive Residual Density. 6 Info

---

1 **ALERT level A** = Most likely a serious problem - resolve or explain

0 **ALERT level B** = A potentially serious problem, consider carefully

6 **ALERT level C** = Check. Ensure it is not caused by an omission or oversight

14 **ALERT level G** = General information/check it is not something unexpected

5 ALERT type 1 CIF construction/syntax error, inconsistent or missing data

4 ALERT type 2 Indicator that the structure model may be wrong or deficient

5 ALERT type 3 Indicator that the structure quality may be low

6 ALERT type 4 Improvement, methodology, query or suggestion

1 ALERT type 5 Informative message, check

---

It is advisable to attempt to resolve as many as possible of the alerts in all categories. Often the minor alerts point to easily fixed oversights, errors and omissions in your CIF or refinement strategy, so attention to these fine details can be worthwhile. In order to resolve some of the more serious problems it may be necessary to carry out additional measurements or structure refinements. However, the purpose of your study may justify the reported deviations and the more serious of these should normally be commented upon in the discussion or experimental section of a paper or in the "special\_details" fields of the CIF. checkCIF was carefully designed to identify outliers and unusual parameters, but every test has its limitations and alerts that are not important in a particular case may appear. Conversely, the absence of alerts does not guarantee there are no aspects of the results needing attention. It is up to the individual to critically assess their own results and, if necessary, seek expert advice.

### **Publication of your CIF in IUCr journals**

A basic structural check has been run on your CIF. These basic checks will be run on all CIFs submitted for publication in IUCr journals (*Acta Crystallographica*, *Journal of Applied Crystallography*, *Journal of Synchrotron Radiation*); however, if you intend to submit to *Acta Crystallographica Section C* or *E* or *IUCrData*, you should make sure that full publication checks are run on the final version of your CIF prior to submission.

### **Publication of your CIF in other journals**

Please refer to the *Notes for Authors* of the relevant journal for any special instructions relating to CIF submission.

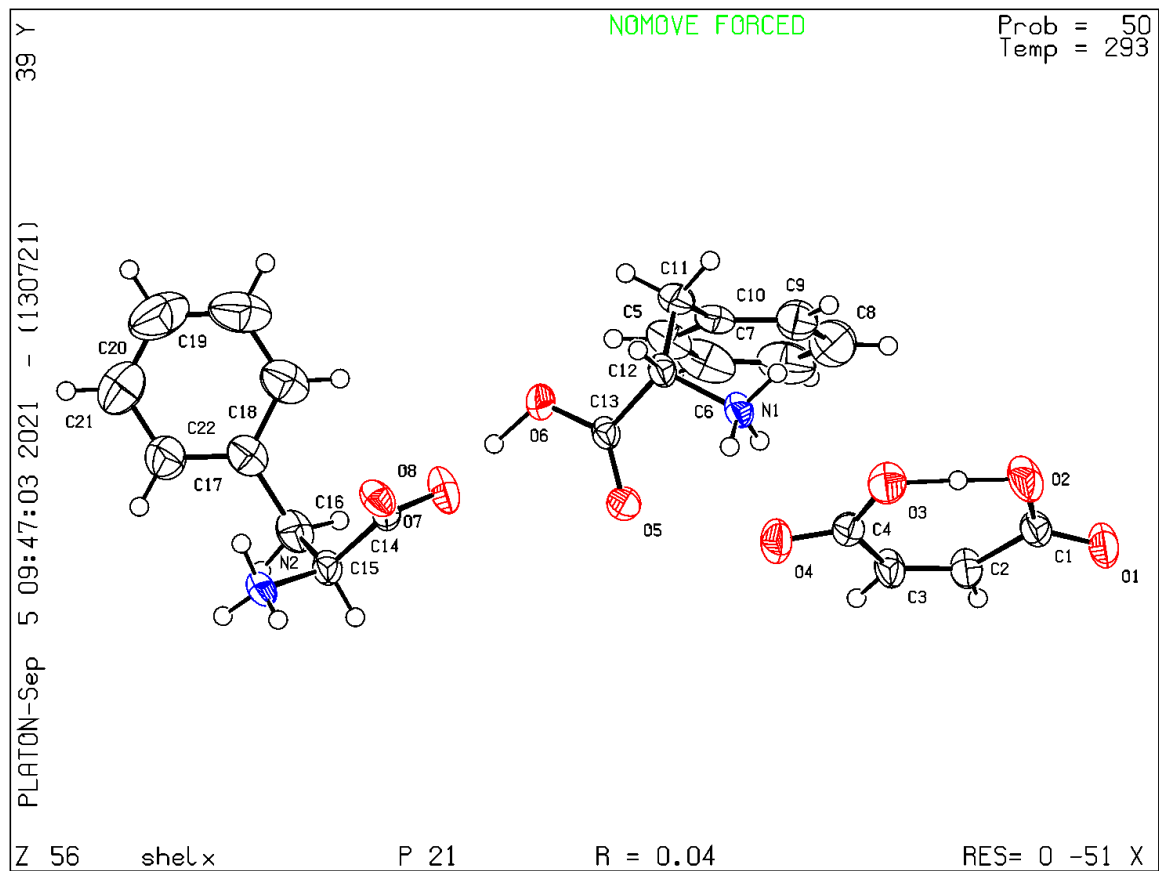

Supplement: s1 [file s1]
