# Supplementary material for: First and Second Dissociation Enthalpies in Bi-Component Crystals Consisting of Maleic Acid and L-Phenylalanine
Source: MDPI journal article supplement (doi:10.3390/molecules26185714), 2021-09-21
Supplement: s1 [file s1]

*Supporting Information*

# First and Second Dissociation Enthalpies of Bi-Component Crystals Consisting of Maleic Acid and L-Phenylalanine

Inês O. Feliciano <sup>1,2</sup>, Daniela P. Silva <sup>3</sup>, M. Fátima M. Piedade <sup>2,3</sup>, Carlos E. S. Bernardes, <sup>1,2</sup> and Manuel E. Minas da Piedade <sup>1,2,\*</sup>

- 1 Centro de Química Estrutural, Faculdade de Ciências, Universidade de Lisboa, 1749-016 Lisboa, Portugal; idfeliciano@fc.ul.pt; cebernardes@fc.ul.pt; mdpiedade@fc.ul.pt; memp@fc.ul.pt
  - 2 Departamento de Química e Bioquímica, Faculdade de Ciências, Universidade de Lisboa, 1749-016 Lisboa, Portugal
  - 3 Centro de Química Estrutural, Instituto Superior Técnico, Universidade de Lisboa, 1049-001 Lisboa, Portugal; daniela.filipa.2710@hotmail.com; mdpiedade@fc.ul.pt
- \* Correspondence: memp@fc.ul.pt; Tel.: +351-217500005 (MEMP)

## Contents:

|                                                               |   |
|---------------------------------------------------------------|---|
| S1. Results of Powder X-ray Diffraction (PXRD) Analyses ..... | 2 |
| S2. Solution Calorimetry Results.....                         | 4 |
| S3. References.....                                           | 6 |

## S1. Results of Powder X-ray Diffraction (PXRD) Analyses

The results from the indexation of the powder patterns of the samples used in this work are summarized in Tables S.1 to S.4, where  $\Delta 2\theta$  denotes the difference between the  $2\theta$  values for peaks experimentally observed and those expected based on the indexed unit cell parameters.

Figure S1 shows a comparison of diffractograms obtained at different time points along the mechanochemical synthesis of MA:Phe<sub>2</sub>, with PXRD patterns corresponding to pure, maleic acid (MA, form I), L-phenylalanine (Phe, form I), MA:Phe, and MA:Phe<sub>2</sub>. The results indicate that after 5 min the reaction mixture (initially consisting of MA and Phe in 1:2 molar ratio) already contains MA:Phe and MA:Phe<sub>2</sub>. The amounts of MA, Phe and MA:Phe progressively decrease with the grinding time (see blue, green, and orange dash lines) and, at 20 min, complete conversion to MA:Phe<sub>2</sub> has occurred. These observations suggest that MA:Phe is a precursor of MA:Phe<sub>2</sub>.

**Table S1.** Indexation of the powder X-ray diffraction pattern of maleic acid (form I) in the range  $5^\circ \leq 2\theta \leq 35^\circ$  (space group  $P2_1/c$ ;  $a = 7.481 \pm 0.033$  Å,  $b = 10.010 \pm 0.015$  Å,  $c = 7.620 \pm 0.032$  Å,  $\beta = 123.66 \pm 0.28^\circ$ ).

| <i>h</i> | <i>k</i> | <i>l</i> | $2\theta^\circ$ | $\Delta 2\theta^\circ$ |
|----------|----------|----------|-----------------|------------------------|
| 1        | 1        | 0        | 16.765          | 0.040                  |
| 0        | 2        | 0        | 17.579          | 0.017                  |
| −1       | 2        | 1        | 22.090          | −0.007                 |
| 0        | 2        | 1        | 22.509          | 0.004                  |
| −1       | 1        | 2        | 24.986          | −0.024                 |
| −2       | 1        | 1        | 25.373          | −0.084                 |
| −2       | 0        | 2        | 26.856          | 0.064                  |
| 0        | 0        | 2        | 28.149          | 0.013                  |
| −1       | 2        | 2        | 29.384          | −0.008                 |
| 1        | 2        | 1        | 30.698          | −0.003                 |
| −2       | 2        | 2        | 32.214          | −0.003                 |
| 0        | 2        | 2        | 33.340          | −0.021                 |
| 2        | 2        | 0        | 33.847          | 0.027                  |

**Table S2.** Indexation of the powder X-ray diffraction pattern of L-phenylalanine (form I) in the range  $5^\circ \leq 2\theta \leq 35^\circ$  (space group  $P2_1$ ,  $a = 8.800 \pm 0.012$  Å,  $b = 6.042 \pm 0.006$  Å,  $c = 31.488 \pm 0.035$  Å,  $\beta = 96.58 \pm 0.34^\circ$ ).

| <i>h</i> | <i>k</i> | <i>l</i> | $2\theta^\circ$ | $\Delta 2\theta^\circ$ | <i>h</i> | <i>k</i> | <i>l</i> | $2\theta^\circ$ | $\Delta 2\theta^\circ$ |
|----------|----------|----------|-----------------|------------------------|----------|----------|----------|-----------------|------------------------|
| 0        | 0        | 2        | 5.645           | −0.001                 | −1       | 1        | 6        | 23.891          | −0.007                 |
| 0        | 0        | 4        | 11.307          | 0.001                  | 0        | 1        | 7        | 24.733          | −0.027                 |
| 0        | 1        | 2        | 15.702          | −0.008                 | 0        | 0        | 9        | 25.677          | 0.067                  |
| 0        | 0        | 6        | 16.989          | −0.005                 | 2        | 1        | 2        | 26.317          | 0.025                  |
| 1        | 1        | 0        | 17.829          | −0.002                 | 0        | 1        | 8        | 27.159          | 0.017                  |
| 1        | 0        | 5        | 18.330          | −0.015                 | 0        | 0        | 10       | 28.491          | −0.021                 |
| −1       | 1        | 3        | 19.240          | −0.019                 | 0        | 1        | 9        | 29.620          | −0.008                 |
| 1        | 1        | 3        | 20.285          | 0.014                  | 2        | 1        | 5        | 30.058          | −0.047                 |
| −1       | 1        | 4        | 20.521          | −0.001                 | −3       | 0        | 3        | 30.866          | −0.011                 |
| 1        | 1        | 4        | 21.835          | 0.050                  | −1       | 1        | 10       | 32.787          | −0.006                 |
| 0        | 0        | 8        | 22.710          | −0.014                 | −3       | 1        | 3        | 34.353          | 0.019                  |

**Table S3.** Indexation of the powder X-ray diffraction pattern of MA:Phe in the range  $5^\circ \leq 2\theta \leq 35^\circ$  (space group  $P2_1$ ,  $a = 11.067 \pm 0.010$  Å,  $b = 5.342 \pm 0.003$  Å,  $c = 11.481 \pm 0.010$  Å,  $\beta = 101.10 \pm 0.13^\circ$ ).

| <i>h</i> | <i>k</i> | <i>l</i> | $2\theta^\circ$ | $\Delta 2\theta^\circ$ | <i>h</i> | <i>k</i> | <i>l</i> | $2\theta^\circ$ | $\Delta 2\theta^\circ$ |
|----------|----------|----------|-----------------|------------------------|----------|----------|----------|-----------------|------------------------|
| 1        | 0        | 0        | 8.186           | 0.045                  | 1        | 1        | 2        | 25.361          | −0.041                 |
| 1        | 0        | 1        | 12.339          | −0.022                 | 2        | 1        | 1        | 25.674          | −0.012                 |
| −1       | 0        | 2        | 16.248          | −0.022                 | −2       | 1        | 2        | 26.426          | 0.004                  |
| −2       | 0        | 1        | 16.677          | −0.026                 | 0        | 1        | 3        | 29.048          | −0.018                 |
| 0        | 1        | 1        | 18.362          | −0.019                 | −3       | 1        | 1        | 29.590          | −0.009                 |
| 1        | 0        | 2        | 19.070          | −0.024                 | 2        | 1        | 2        | 30.065          | 0.017                  |
| 2        | 0        | 1        | 19.482          | 0.017                  | −2       | 1        | 3        | 31.116          | 0.009                  |
| −2       | 0        | 2        | 20.398          | −0.015                 | 2        | 0        | 3        | 31.485          | 0.021                  |
| 1        | 1        | 1        | 20.729          | −0.017                 | 0        | 0        | 4        | 31.805          | 0.035                  |
| 0        | 1        | 2        | 22.925          | −0.019                 | 3        | 1        | 1        | 32.114          | 0.007                  |
| −1       | 1        | 2        | 23.343          | 0.021                  | −4       | 0        | 0        | 32.991          | 0.001                  |
| −2       | 1        | 1        | 23.666          | 0.036                  | −1       | 2        | 1        | 35.167          | 0.019                  |
| −3       | 0        | 0        | 24.579          | −0.012                 | 2        | 1        | 3        | 35.768          | −0.009                 |

**Table S4.** Indexation of the powder X-ray diffraction pattern of MA:Phe<sub>2</sub> in the range  $5^\circ \leq 2\theta \leq 35^\circ$  (space group  $P2_1$ ,  $a = 13.974 \pm 0.020$  Å,  $b = 5.425 \pm 0.003$  Å,  $c = 15.415 \pm 0.022$  Å,  $\beta = 108.78 \pm 0.16^\circ$ ).

| $h$ | $k$ | $l$ | $2\theta/^\circ$ | $\Delta 2\theta/^\circ$ | $h$ | $k$ | $l$ | $2\theta/^\circ$ | $\Delta 2\theta/^\circ$ |
|-----|-----|-----|------------------|-------------------------|-----|-----|-----|------------------|-------------------------|
| 1   | 0   | 0   | 6.662            | −0.019                  | 2   | 1   | 0   | 21.187           | 0.008                   |
| −1  | 0   | 2   | 11.789           | −0.026                  | −2  | 1   | 2   | 22.176           | −0.006                  |
| −2  | 0   | 1   | 12.770           | −0.021                  | 1   | 1   | 2   | 22.688           | −0.006                  |
| −2  | 0   | 0   | 13.375           | −0.009                  | −1  | 0   | 4   | 23.094           | −0.013                  |
| −2  | 0   | 2   | 14.884           | −0.018                  | −2  | 0   | 4   | 23.813           | 0.055                   |
| 1   | 0   | 2   | 15.629           | −0.014                  | 0   | 1   | 3   | 24.570           | −0.008                  |
| 2   | 0   | 1   | 16.396           | 0.001                   | −2  | 1   | 3   | 25.125           | 0.085                   |
| 0   | 1   | 1   | 17.429           | −0.010                  | −4  | 0   | 1   | 25.630           | 0.003                   |
| −1  | 1   | 1   | 17.948           | −0.023                  | 3   | 1   | 0   | 26.041           | 0.004                   |
| 0   | 0   | 3   | 18.227           | −0.009                  | 2   | 1   | 2   | 26.572           | −0.011                  |
| −2  | 0   | 3   | 18.806           | −0.039                  | 4   | 0   | 0   | 26.967           | 0.012                   |
| −3  | 0   | 1   | 19.057           | 0.000                   | −3  | 1   | 3   | 27.861           | −0.016                  |
| 1   | 1   | 1   | 19.387           | −0.002                  | −2  | 1   | 4   | 28.954           | −0.016                  |
| −3  | 0   | 2   | 19.878           | −0.012                  | 0   | 0   | 5   | 30.638           | 0.010                   |
| 3   | 0   | 0   | 20.167           | 0.033                   | −3  | 1   | 4   | 31.038           | −0.005                  |
| 0   | 1   | 2   | 20.404           | 0.007                   | 4   | 1   | 0   | 31.673           | −0.008                  |
| −2  | 1   | 1   | 20.814           | 0.010                   |     |     |     |                  |                         |

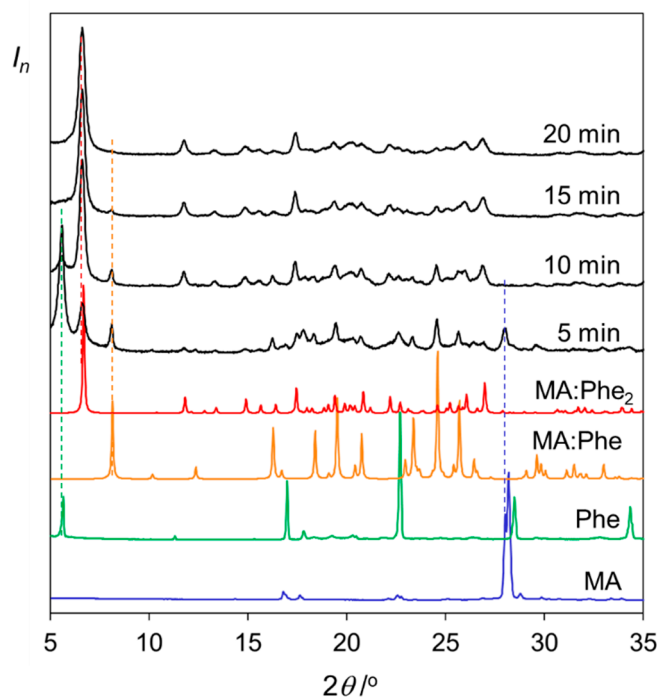

**Figure S1.** Comparison of diffractograms obtained for a 1:2 mixture of maleic acid (form I) and L-phenylalanine (form I), at different time points along the mechanochemical synthesis of MA:Phe<sub>2</sub>, with PXRD patterns corresponding to pure, maleic acid (form I), L-phenylalanine (form I), MA:Phe, and MA:Phe<sub>2</sub>. The dash lines refer to characteristic peaks of MA (blue), Phe (green), MA:Phe (orange) and MA:Phe<sub>2</sub> (red).

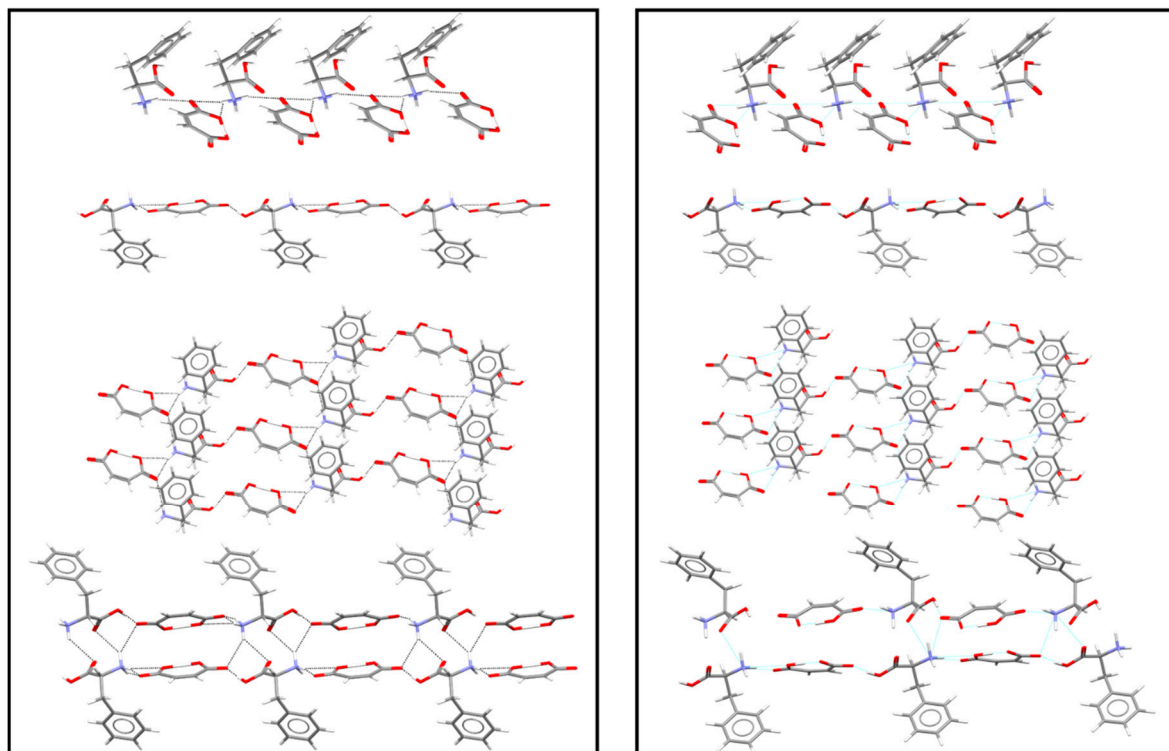

**Figure S2.** Comparison of the packing motifs in the reported MA:Phe structures at 293 K (left; CSD Refcode EDAXIQ) [1, 2] and 25 K (right; CSD Refcode EDAXIQ03 [2, 3]).

## S2. Solution Calorimetry

The results of the solution calorimetry measurements corresponding to the processes:

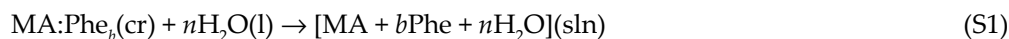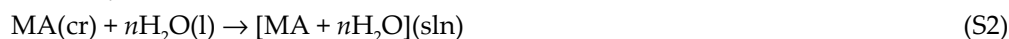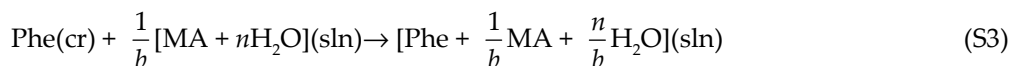

are listed in Tables S.5 to S.9, where  $m$ ,  $m_{\text{H}_2\text{O}}$ , and  $m_{\text{sln}}$  are the masses of compound, water, and solution, respectively;  $A$  is the area of the calorimetric curve;  $A_b = -0.978 \pm 0.072 \text{ mV}\cdot\text{s}$ , is the area correction corresponding to the drop process;  $e$  is the calibration constant;  $n$  is the number of water molecules per mole of maleic acid in the mixture; and  $\Delta_{\text{sol}}h^\circ$  is the standard specific enthalpy of solution.

The uncertainties assigned to the mean values of the standard specific enthalpies of solution,  $\langle \Delta_{\text{sol}}h^\circ \rangle$ , are combined standard uncertainties,  $u_c$  [4], calculated as:

$$u_c = \langle \Delta_{\text{sol}}h^\circ \rangle \sqrt{\left( \frac{u_{\Delta_{\text{sol}}h^\circ}}{\langle \Delta_{\text{sol}}h^\circ \rangle} \right)^2 + \left( \frac{u_e}{\langle \epsilon \rangle} \right)^2} \quad (\text{S4})$$

where  $u_e$  and  $u_{\Delta_{\text{sol}}h^\circ}$  are the uncertainty contributions from the calibration and the main experiment, respectively, calculated as standard deviations of the mean [4]:

$$u = \sqrt{\frac{\sum_i^n (\Delta_{\text{sol}}h_i^\circ - \langle \Delta_{\text{sol}}h^\circ \rangle)^2}{n(n-1)}} \quad (\text{S5})$$

where  $\Delta_{\text{sol}}h_i^\circ$  is the value corresponding to the  $i^{\text{th}}$  measurement and  $n$  is the number of independent measurements.

All standard molar enthalpies of solution were calculated as:

$$\Delta_{\text{sln}}H_m^\circ = M \langle \Delta_{\text{sol}}h^\circ \rangle \quad (\text{S6})$$

where  $M$  is the molar mass of the reference compound calculated from the conventional standard atomic masses recommended by IUPAC in 2013 [5]. The assigned uncertainties were taken as expanded uncertainties,  $U$  [4], given by:

$$U = 2Mu_c \quad (\text{S7})$$

where  $u_c$  is uncertainty of the corresponding standard specific enthalpy of solution calculated from eq. S4.

**Table S5.** Solution calorimetry results for the dissolution of MA:Phe in water (eq. S1,  $b = 1$ ).<sup>a</sup>

| $m/\text{mg}$ | $m_{\text{H}_2\text{O}}/\text{g}$ | $n$    | $\varepsilon/\mu\text{W mV}^{-1}$ | $A-A_b/\text{mV s}$ | $\Delta_{\text{sol}}h^\circ/\text{J g}^{-1}$ |
|---------------|-----------------------------------|--------|-----------------------------------|---------------------|----------------------------------------------|
| 27.2956       | 13.0660                           | 7473.6 | 6.883                             | 491.333             | 124.149                                      |
| 26.7129       | 13.0966                           | 7654.5 | 6.913                             | 483.012             | 124.709                                      |
| 26.7320       | 13.0169                           | 7602.5 | 6.907                             | 483.071             | 124.635                                      |
| 24.1415       | 13.0456                           | 8436.9 | 6.879                             | 432.806             | 123.649                                      |
| 26.7498       | 13.1351                           | 7666.4 | 6.905                             | 482.627             | 124.438                                      |

<sup>a</sup>  $\langle\varepsilon\rangle = 6.897 \pm 0.007 \mu\text{W mV}^{-1}$ ;  $\langle n \rangle = 7767 \pm 171$ ;  $\langle \Delta_{\text{sol}}h^\circ \rangle = 124.316 \pm 0.193 \text{ J g}^{-1}$ ;  $M(\text{MA:Phe}) = 281.264 \text{ g mol}^{-1}$ ;  $\Delta_{\text{sol}}H_m^\circ = 34.97 \pm 0.13 \text{ kJ mol}^{-1}$

**Table S6.** Solution calorimetry results for the dissolution of MA:Phe<sub>2</sub> in water (eq. S1,  $b = 2$ ).<sup>a</sup>

| $m/\text{mg}$ | $m_{\text{H}_2\text{O}}/\text{g}$ | $n$    | $\varepsilon/\mu\text{W mV}^{-1}$ | $A-A_b/\text{mV s}$ | $\Delta_{\text{sol}}h^\circ/\text{J g}^{-1}$ |
|---------------|-----------------------------------|--------|-----------------------------------|---------------------|----------------------------------------------|
| 42.8930       | 13.0501                           | 7539.8 | 6.965                             | 700.784             | 113.140                                      |
| 43.7776       | 12.9930                           | 7355.1 | 6.934                             | 713.197             | 112.818                                      |
| 42.7106       | 13.0329                           | 7562.0 | 6.974                             | 697.214             | 113.045                                      |
| 43.2841       | 13.0060                           | 7446.4 | 6.945                             | 707.024             | 113.116                                      |
| 43.2596       | 13.1014                           | 7505.3 | 6.808                             | 707.603             | 113.273                                      |

<sup>a</sup>  $\langle\varepsilon\rangle = 6.925 \pm 0.030 \mu\text{W mV}^{-1}$ ;  $\langle n \rangle = 7482 \pm 37$ ;  $\langle \Delta_{\text{sol}}h^\circ \rangle = 113.078 \pm 0.075 \text{ J g}^{-1}$ ;  $M(\text{MA:Phe}_2) = 446.456 \text{ g mol}^{-1}$ ;  $\Delta_{\text{sol}}H_m^\circ = 50.48 \pm 0.22 \text{ kJ mol}^{-1}$

**Table S7.** Solution calorimetry results for the dissolution of maleic acid in water (eq. S2).<sup>a</sup>

| $m/\text{mg}$ | $m_{\text{H}_2\text{O}}/\text{g}$ | $n$    | $\varepsilon/\mu\text{W mV}^{-1}$ | $A-A_b/\text{mV s}$ | $\Delta_{\text{sol}}h^\circ/\text{J g}^{-1}$ |
|---------------|-----------------------------------|--------|-----------------------------------|---------------------|----------------------------------------------|
| 11.3096       | 13.04615                          | 7432.4 | 7.164                             | 275.633             | 173.867                                      |
| 10.8922       | 13.0362                           | 7711.3 | 7.129                             | 270.790             | 177.358                                      |
| 11.3384       | 13.05156                          | 7416.6 | 7.131                             | 278.323             | 175.118                                      |
| 11.7892       | 13.01253                          | 7111.7 | 7.127                             | 290.580             | 175.839                                      |
| 11.9902       | 13.07812                          | 7027.7 | 7.121                             | 292.685             | 174.143                                      |

<sup>a</sup>  $\langle\varepsilon\rangle = 7.134 \pm 0.008 \mu\text{W mV}^{-1}$ ;  $\langle n \rangle = 7140 \pm 123$ ;  $\langle \Delta_{\text{sol}}h^\circ \rangle = 175.265 \pm 0.630 \text{ J g}^{-1}$ ;  $M(\text{MA}) = 116.072 \text{ g mol}^{-1}$ ;  $\Delta_{\text{sol}}H_m^\circ = 20.34 \pm 0.15 \text{ kJ mol}^{-1}$ .

**Table S8.** Solution calorimetry results for the dissolution of L-phenylalanine in an aqueous solution of maleic acid (eq. S3,  $b = 1$ ).<sup>a</sup>

| $m/\text{mg}$ | $m_{\text{sln}}/\text{g}$ | $n$    | $\varepsilon/\mu\text{W mV}^{-1}$ | $A-A_b/\text{mV s}$ | $\Delta_{\text{sol}}h^\circ/\text{J g}^{-1}$ |
|---------------|---------------------------|--------|-----------------------------------|---------------------|----------------------------------------------|
| 16.0727       | 13.1716                   | 7425.9 | 6.657                             | 103.639             | 42.867                                       |
| 14.0275       | 13.0256                   | 7704.9 | 6.693                             | 89.314              | 42.328                                       |
| 16.2460       | 13.0875                   | 7410.1 | 6.612                             | 104.087             | 42.593                                       |
| 15.8153       | 13.0093                   | 7105.2 | 6.661                             | 101.854             | 42.815                                       |
| 16.7553       | 13.0668                   | 7021.2 | 6.617                             | 107.056             | 42.477                                       |

<sup>a</sup>  $\langle\varepsilon\rangle = 6.648 \pm 0.015 \mu\text{W mV}^{-1}$ ;  $\langle n \rangle = 7333 \pm 123$ ;  $\langle \Delta_{\text{sol}}h^\circ \rangle = 42.616 \pm 0.101 \text{ J g}^{-1}$ ;  $M(\text{Phe}) = 165.192 \text{ g mol}^{-1}$ ;  $\Delta_{\text{sol}}H_m^\circ = 7.04 \pm 0.05 \text{ kJ mol}^{-1}$

**Table S9.** Solution calorimetry results for the dissolution of L-phenylalanine in an aqueous solution of maleic acid (eq. S3;  $b = 2$ ).<sup>a</sup>

| $m/\text{mg}$ | $m_{\text{sln}}/\text{g}$ | $n$    | $\varepsilon/\mu\text{W mV}^{-1}$ | $A-A_b/\text{mV s}$ | $\Delta_{\text{sol}}h^\circ/\text{J g}^{-1}$ |
|---------------|---------------------------|--------|-----------------------------------|---------------------|----------------------------------------------|
| 32.6086       | 12.9693                   | 7427.9 | 6.635                             | 206.980             | 42.261                                       |
| 31.8949       | 13.2786                   | 7427.9 | 6.693                             | 205.646             | 42.928                                       |
| 32.6640       | 13.2125                   | 7427.9 | 6.644                             | 208.383             | 42.475                                       |
| 32.2685       | 13.0757                   | 7427.9 | 6.636                             | 207.733             | 42.862                                       |
| 32.1997       | 13.3839                   | 7427.9 | 6.683                             | 204.248             | 42.233                                       |

<sup>a</sup>  $\langle \varepsilon \rangle = 6.658 \pm 0.012 \mu\text{W mV}^{-1}$ ;  $\langle n \rangle = 7428$ ;  $\langle \Delta_{\text{sol}}h^\circ \rangle = 42.552 \pm 0.147 \text{ J g}^{-1}$ ;  $M(\text{Phe}) = 165.192 \text{ g mol}^{-1}$ ;  
 $\Delta_{\text{sol}}H_m^\circ = 7.03 \pm 0.02 \text{ kJ mol}^{-1}$

The standard molar enthalpy of solution of maleic acid in water (Table S7) had been previously reported for two different water/MA molar ratios ( $n$ ) by Apelblat ( $n = 2162$ ,  $\Delta_{\text{sol}}H_m^\circ = 21.333 \pm 0.029 \text{ kJ} \cdot \text{mol}^{-1}$ ) [6] and Évora *et al.* ( $n = 9500$ ,  $\Delta_{\text{sol}}H_m^\circ = 19.47 \pm 0.52 \text{ kJ} \cdot \text{mol}^{-1}$ ) [7]. These results seem to be consistent with that obtained in this work ( $n = 7340$ ,  $\Delta_{\text{sol}}H_m^\circ = 20.34 \pm 0.15 \text{ kJ} \cdot \text{mol}^{-1}$ , Table S7). Indeed, when the three independently determined  $\Delta_{\text{sol}}H_m^\circ$  values are plotted as a function of  $n$  (Figure S3) a least-squares fitting leads to the following linear relationship with a determination coefficient of  $R^2 = 0.962$ .

$$\Delta_{\text{sol}}H_m^\circ(\text{S2})/\text{kJ} \cdot \text{mol}^{-1} = -(2.43 \pm 0.48) \times 10^{-4}n + (21.92 \pm 0.34) \quad (\text{S8})$$

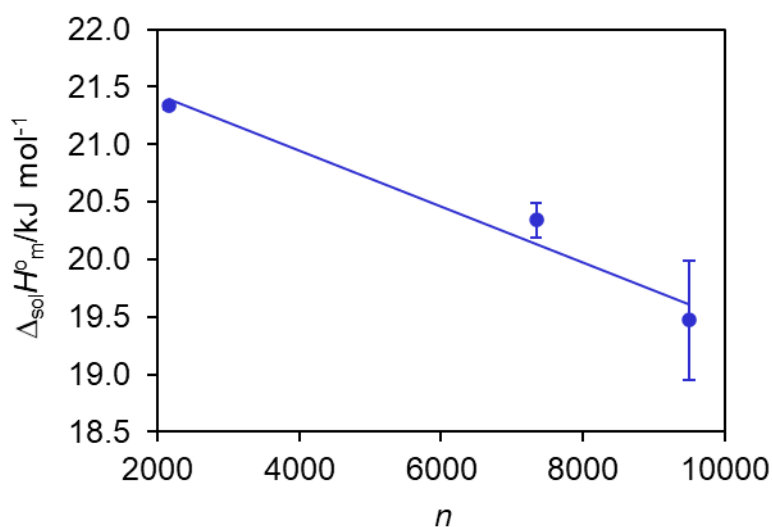**Figure S3.** Enthalpy of solution of maleic acid in water as a function of the H<sub>2</sub>O/MA molar ratio,  $n$ .



### S3. References

1. Alagar, M.; Krishnakumar, R. V.; Natarajan, S., L-phenylalaninium maleate. *Acta Crystallogr.* **2001**, E57, o968-o970.
2. Groom, C. R.; Bruno, I. J.; Lightfoot, M. P.; Ward, S. C., The Cambridge Structural Database. *Acta Crystallogr.* **2016**, B72, 171-179.
3. Woińska, M.; Jayatilaka, D.; Spackman, M. A.; Edwards, A. J.; Dominiak, P. M.; Woźniak, K.; Nishibori, E.; Sugimoto, K.; Grabowsky, S., Hirshfeld atom refinement for modelling strong hydrogen bonds. *Acta Crystallogr.* **2014**, A70, 483-498.
4. Taylor, B. N.; Kuyatt, C. E., *Guidelines for evaluating and expressing the uncertainty of NIST measurements (NIST Technical Note 1297)*. NIST: Gaithersburg, 1994.
5. Meija, J.; Coplen, T. B.; Berglund, M.; Brand, W. A.; De Bièvre, P.; Gröning, M.; Holden, N. E.; Irrgeher, J.; Loss, R. D.; Walczyk, T.; Prohaska, T., Atomic weights of the elements 2013 (IUPAC Technical Report). *Pure Appl. Chem.* **2016**, 88, 265-291.
6. Apelblat, A., Enthalpy of solution of oxalic, succinic, adipic, maleic, malic, tartaric, and citric acids, oxalic-acid dihydrate, and citric-acid monohydrate in water at 298.15-K. *J. Chem. Thermodyn.* **1986**, 18, 351-357.
7. Évora, A. O. L.; Bernardes, C. E. S.; Piedade, M. F. M.; Conceição, A. C. L.; Minas da Piedade, M. E., Energetics of glycine cocrystal or salt formation with two regioisomers: Fumaric acid and maleic acid. *Cryst. Growth Des.* **2019**, 19, 5054-5064.
