# Supplementary material for: First and Second Dissociation Enthalpies in Bi-Component Crystals Consisting of Maleic Acid and L-Phenylalanine
Source: Molecules. 2021 Sep 21;26(18):5714. doi: 10.3390/molecules26185714 (PMC8469174; doi:10.3390/molecules26185714)
Supplement: Supplementary file 1 [file molecules-26-05714-s001.zip]

Archive with 5 entries (5 files):
- MA-Phe2_168K_checkcif_R1.pdf
- MA-Phe2_168K_R1.cif
- MA-Phe2_293K_checkcif_R1.pdf
- MA-Phe2_293K_R1.cif
- molecules-1362123_SI_R1.pdf
