# Supplementary material for: First and Second Dissociation Enthalpies in Bi-Component Crystals Consisting of Maleic Acid and L-Phenylalanine
Source: Molecules. 2021 Sep 21;26(18):5714. doi: 10.3390/molecules26185714 (PMC8469174; doi:10.3390/molecules26185714)
Supplement: Supplementary file 1 [file molecules-26-05714-s001.zip › MA-Phe2_168K_R1.cif]

 
data_shelx
 
_audit_creation_method            'SHELXL-2018/3'
_shelx_SHELXL_version_number      '2018/3'
_chemical_name_systematic         ?
_chemical_name_common             ?
_chemical_melting_point           ?
_chemical_formula_moiety          ?
_chemical_formula_sum
 'C22 H26 N2 O8' 
_chemical_formula_weight          446.45

loop_
 _atom_type_symbol
 _atom_type_description
 _atom_type_scat_dispersion_real
 _atom_type_scat_dispersion_imag
 _atom_type_scat_source
 'C'  'C'   0.0033   0.0016
 'International Tables Vol C Tables 4.2.6.8 and 6.1.1.4'
 'H'  'H'   0.0000   0.0000
 'International Tables Vol C Tables 4.2.6.8 and 6.1.1.4'
 'N'  'N'   0.0061   0.0033
 'International Tables Vol C Tables 4.2.6.8 and 6.1.1.4'
 'O'  'O'   0.0106   0.0060
 'International Tables Vol C Tables 4.2.6.8 and 6.1.1.4'
 
_space_group_crystal_system       monoclinic
_space_group_IT_number            4
_space_group_name_H-M_alt         'P 21'
_space_group_name_Hall            'P 2yb'
 
_shelx_space_group_comment
;
The symmetry employed for this shelxl refinement is uniquely defined
by the following loop, which should always be used as a source of
symmetry information in preference to the above space-group names.
They are only intended as comments.
;
 
loop_
 _space_group_symop_operation_xyz
 'x, y, z'
 '-x, y+1/2, -z'
 
_cell_length_a                    13.7482(17)
_cell_length_b                    5.4010(7)
_cell_length_c                    15.3787(19)
_cell_angle_alpha                 90
_cell_angle_beta                  109.028(4)
_cell_angle_gamma                 90
_cell_volume                      1079.5(2)
_cell_formula_units_Z             2
_cell_measurement_temperature     168(2)
_cell_measurement_reflns_used     6425
_cell_measurement_theta_min       2.42
_cell_measurement_theta_max       26.20
 
_exptl_crystal_description        'plate'
_exptl_crystal_colour             'colourless'
_exptl_crystal_density_meas       ?
_exptl_crystal_density_method     ?
_exptl_crystal_density_diffrn     1.373          
_exptl_crystal_F_000              472
_exptl_transmission_factor_min    ?
_exptl_transmission_factor_max    ?
_exptl_crystal_size_max           0.400
_exptl_crystal_size_mid           0.350
_exptl_crystal_size_min           0.100
_exptl_absorpt_coefficient_mu     0.105
_shelx_estimated_absorpt_T_min    0.959
_shelx_estimated_absorpt_T_max    0.990
_exptl_absorpt_correction_type    'multi-scan'
_exptl_absorpt_correction_T_min   0.5143
_exptl_absorpt_correction_T_max   0.7454
_exptl_absorpt_process_details    ?
_exptl_absorpt_special_details    ?
_diffrn_ambient_temperature       168(2)
_diffrn_radiation_wavelength      0.71073
_diffrn_radiation_type            MoK\a
_diffrn_source                    ?
_diffrn_measurement_device_type   'Bruker D8 QUEST'
_diffrn_measurement_method        '\f and \w scans'
_diffrn_detector_area_resol_mean  ?
_diffrn_reflns_number             17895
_diffrn_reflns_av_unetI/netI      0.0501
_diffrn_reflns_av_R_equivalents   0.0599
_diffrn_reflns_limit_h_min        -17
_diffrn_reflns_limit_h_max        17
_diffrn_reflns_limit_k_min        -6
_diffrn_reflns_limit_k_max        6
_diffrn_reflns_limit_l_min        -19
_diffrn_reflns_limit_l_max        19
_diffrn_reflns_theta_min          2.419
_diffrn_reflns_theta_max          26.466
_diffrn_reflns_theta_full         25.242
_diffrn_measured_fraction_theta_max   0.994
_diffrn_measured_fraction_theta_full  0.997
_diffrn_reflns_Laue_measured_fraction_max    0.994
_diffrn_reflns_Laue_measured_fraction_full   0.997
_diffrn_reflns_point_group_measured_fraction_max   0.993
_diffrn_reflns_point_group_measured_fraction_full  0.997
_reflns_number_total              4434
_reflns_number_gt                 3760
_reflns_threshold_expression      'I > 2\s(I)'
_reflns_Friedel_coverage          0.798
_reflns_Friedel_fraction_max      0.992
_reflns_Friedel_fraction_full     0.998
 
_reflns_special_details
;
 Reflections were merged by SHELXL according to the crystal
 class for the calculation of statistics and refinement.
 
 _reflns_Friedel_fraction is defined as the number of unique
 Friedel pairs measured divided by the number that would be
 possible theoretically, ignoring centric projections and
 systematic absences.
;
 
_computing_data_collection        'Bruker APEX3'
_computing_cell_refinement        'Bruker SAINT'
_computing_data_reduction         'Bruker SAINT'
_computing_structure_solution     'SHELXT 2018/2 (Sheldrick, 2018)'
_computing_structure_refinement 'SHELXL-2018/3 (Sheldrick, 2018)'
_computing_molecular_graphics     'Mercury'
_computing_publication_material   ?
_refine_special_details           ?
_refine_ls_structure_factor_coef  Fsqd
_refine_ls_matrix_type            full
_refine_ls_weighting_scheme       calc
_refine_ls_weighting_details
'w=1/[\s^2^(Fo^2^)+(0.0336P)^2^+0.8796P] where P=(Fo^2^+2Fc^2^)/3'
_atom_sites_solution_primary      ?
_atom_sites_solution_secondary    ?
_atom_sites_solution_hydrogens    mixed
_refine_ls_hydrogen_treatment     mixed
_refine_ls_extinction_method      none
_refine_ls_extinction_coef        .
_refine_ls_abs_structure_details
;
 Flack x determined using 1479 quotients [(I+)-(I-)]/[(I+)+(I-)]
 (Parsons, Flack and Wagner, Acta Cryst. B69 (2013) 249-259).
;
_refine_ls_abs_structure_Flack    -1.2(6)
_chemical_absolute_configuration  'syn'
_refine_ls_number_reflns          4434
_refine_ls_number_parameters      321
_refine_ls_number_restraints      1
_refine_ls_R_factor_all           0.0631
_refine_ls_R_factor_gt            0.0497
_refine_ls_wR_factor_ref          0.1159
_refine_ls_wR_factor_gt           0.1116
_refine_ls_goodness_of_fit_ref    1.067
_refine_ls_restrained_S_all       1.067
_refine_ls_shift/su_max           0.000
_refine_ls_shift/su_mean          0.000
 
loop_
 _atom_site_label
 _atom_site_type_symbol
 _atom_site_fract_x
 _atom_site_fract_y
 _atom_site_fract_z
 _atom_site_U_iso_or_equiv
 _atom_site_adp_type
 _atom_site_occupancy
 _atom_site_site_symmetry_order  
 _atom_site_calc_flag
 _atom_site_refinement_flags_posn
 _atom_site_refinement_flags_adp
 _atom_site_refinement_flags_occupancy
 _atom_site_disorder_assembly
 _atom_site_disorder_group
O8 O 0.8982(2) 0.4436(5) 0.60273(18) 0.0262(6) Uani 1 1 d . . . . .
O2 O 0.9104(2) 0.7544(5) 1.05988(19) 0.0300(7) Uani 1 1 d . . . . .
O5 O 0.9167(2) 0.5679(5) 0.34632(18) 0.0274(6) Uani 1 1 d . . . . .
O4 O 0.8755(2) 0.5443(6) 0.78079(17) 0.0308(7) Uani 1 1 d . . . . .
O6 O 0.7934(2) 0.7018(5) 0.40127(18) 0.0273(6) Uani 1 1 d . . . . .
O7 O 0.7875(2) 0.2993(5) 0.47146(18) 0.0305(7) Uani 1 1 d . . . . .
O1 O 0.9004(2) 0.4617(6) 1.15639(18) 0.0317(7) Uani 1 1 d . . . . .
O3 O 0.8894(3) 0.7937(5) 0.8980(2) 0.0346(7) Uani 1 1 d . . . . .
N1 N 0.9174(3) 0.9876(6) 0.2530(2) 0.0227(7) Uani 1 1 d . . . . .
N2 N 0.8979(3) 0.0279(7) 0.6965(2) 0.0247(7) Uani 1 1 d . . . . .
C14 C 0.8420(3) 0.2804(7) 0.5561(2) 0.0234(8) Uani 1 1 d . . . . .
C4 C 0.8765(3) 0.5775(8) 0.8606(3) 0.0268(9) Uani 1 1 d . . . . .
C13 C 0.8568(3) 0.7255(7) 0.3561(2) 0.0222(8) Uani 1 1 d . . . . .
C15 C 0.8356(3) 0.0261(7) 0.5972(2) 0.0250(8) Uani 1 1 d . . . . .
H15 H 0.867238 -0.096805 0.565789 0.030 Uiso 1 1 calc R U . . .
C1 C 0.8946(3) 0.5275(7) 1.0777(3) 0.0258(8) Uani 1 1 d . . . . .
C10 C 0.6877(3) 0.8932(7) 0.1771(3) 0.0266(9) Uani 1 1 d . . . . .
C12 C 0.8501(3) 0.9826(7) 0.3118(3) 0.0245(8) Uani 1 1 d . . . . .
H12 H 0.878034 1.105685 0.362355 0.029 Uiso 1 1 calc R U . . .
C16 C 0.7246(3) -0.0575(8) 0.5828(3) 0.0296(9) Uani 1 1 d . . . . .
H16A H 0.686462 -0.060573 0.515973 0.036 Uiso 1 1 calc R U . . .
H16B H 0.726167 -0.228844 0.606089 0.036 Uiso 1 1 calc R U . . .
C2 C 0.8675(3) 0.3408(7) 1.0023(3) 0.0271(9) Uani 1 1 d . . . . .
H2 H 0.852823 0.180528 1.020232 0.033 Uiso 1 1 calc R U . . .
C11 C 0.7396(3) 1.0594(8) 0.2576(3) 0.0288(9) Uani 1 1 d . . . . .
H11A H 0.698450 1.060270 0.299746 0.035 Uiso 1 1 calc R U . . .
H11B H 0.740397 1.230488 0.234693 0.035 Uiso 1 1 calc R U . . .
C17 C 0.6661(3) 0.1034(8) 0.6294(3) 0.0293(9) Uani 1 1 d . . . . .
C9 C 0.6950(3) 0.9391(8) 0.0901(3) 0.0319(9) Uani 1 1 d . . . . .
H9 H 0.729652 1.083504 0.080597 0.038 Uiso 1 1 calc R U . . .
C3 C 0.8604(3) 0.3597(7) 0.9142(3) 0.0281(9) Uani 1 1 d . . . . .
H3 H 0.842177 0.210779 0.879876 0.034 Uiso 1 1 calc R U . . .
C18 C 0.6647(3) 0.0487(9) 0.7168(3) 0.0362(10) Uani 1 1 d . . . . .
H18 H 0.700464 -0.093034 0.747808 0.043 Uiso 1 1 calc R U . . .
C5 C 0.6326(3) 0.6846(8) 0.1881(3) 0.0304(9) Uani 1 1 d . . . . .
H5 H 0.625241 0.650861 0.246309 0.036 Uiso 1 1 calc R U . . .
C8 C 0.6525(4) 0.7776(10) 0.0169(3) 0.0401(11) Uani 1 1 d . . . . .
H8 H 0.660856 0.807926 -0.041146 0.048 Uiso 1 1 calc R U . . .
C22 C 0.6130(3) 0.3138(9) 0.5852(3) 0.0355(10) Uani 1 1 d . . . . .
H22 H 0.613111 0.355765 0.525201 0.043 Uiso 1 1 calc R U . . .
C7 C 0.5981(3) 0.5727(9) 0.0293(3) 0.0390(11) Uani 1 1 d . . . . .
H7 H 0.567459 0.464015 -0.020749 0.047 Uiso 1 1 calc R U . . .
C21 C 0.5601(4) 0.4614(10) 0.6291(4) 0.0451(12) Uani 1 1 d . . . . .
H21 H 0.524136 0.603740 0.598815 0.054 Uiso 1 1 calc R U . . .
C6 C 0.5883(3) 0.5261(9) 0.1145(3) 0.0387(11) Uani 1 1 d . . . . .
H6 H 0.551148 0.384858 0.122781 0.046 Uiso 1 1 calc R U . . .
C20 C 0.5597(4) 0.4024(10) 0.7161(4) 0.0487(13) Uani 1 1 d . . . . .
H20 H 0.523291 0.503743 0.745550 0.058 Uiso 1 1 calc R U . . .
C19 C 0.6118(4) 0.1971(10) 0.7603(4) 0.0448(12) Uani 1 1 d . . . . .
H19 H 0.611672 0.156641 0.820429 0.054 Uiso 1 1 calc R U . . .
H1NB H 0.907(3) 0.854(7) 0.213(2) 0.007(9) Uiso 1 1 d . . . . .
H2NB H 0.969(3) 0.038(8) 0.701(2) 0.016(9) Uiso 1 1 d . . . . .
H2NC H 0.882(3) 0.159(8) 0.728(3) 0.016(10) Uiso 1 1 d . . . . .
H1NC H 0.990(3) 0.982(7) 0.286(2) 0.009(8) Uiso 1 1 d . . . . .
H1NA H 0.911(4) 1.132(12) 0.218(4) 0.057(17) Uiso 1 1 d . . . . .
H2NA H 0.889(3) -0.111(9) 0.725(3) 0.030(12) Uiso 1 1 d . . . . .
H6O H 0.792(4) 0.522(12) 0.432(4) 0.055(15) Uiso 1 1 d . . . . .
H3O H 0.899(3) 0.772(9) 0.974(3) 0.026(11) Uiso 1 1 d . . . . .
 
loop_
 _atom_site_aniso_label
 _atom_site_aniso_U_11
 _atom_site_aniso_U_22
 _atom_site_aniso_U_33
 _atom_site_aniso_U_23
 _atom_site_aniso_U_13
 _atom_site_aniso_U_12
O8 0.0422(16) 0.0152(13) 0.0214(13) -0.0005(11) 0.0108(12) -0.0024(12)
O2 0.0498(18) 0.0173(14) 0.0271(15) -0.0026(12) 0.0184(13) -0.0028(13)
O5 0.0436(15) 0.0160(13) 0.0272(14) -0.0004(12) 0.0178(12) 0.0010(13)
O4 0.0504(17) 0.0256(15) 0.0211(13) 0.0026(12) 0.0180(12) -0.0020(14)
O6 0.0421(17) 0.0214(15) 0.0245(14) 0.0042(11) 0.0191(13) 0.0031(12)
O7 0.0474(18) 0.0254(15) 0.0187(13) 0.0026(12) 0.0109(12) -0.0057(13)
O1 0.0501(18) 0.0288(15) 0.0198(13) 0.0009(12) 0.0162(13) 0.0012(14)
O3 0.066(2) 0.0168(14) 0.0263(15) 0.0023(12) 0.0217(14) -0.0014(14)
N1 0.035(2) 0.0159(17) 0.0198(15) 0.0019(14) 0.0124(14) -0.0016(14)
N2 0.036(2) 0.0197(18) 0.0212(16) 0.0058(15) 0.0137(14) 0.0011(16)
C14 0.042(2) 0.0160(17) 0.0180(17) -0.0003(15) 0.0174(17) 0.0036(16)
C4 0.034(2) 0.026(2) 0.0221(19) 0.0009(17) 0.0118(16) 0.0025(18)
C13 0.035(2) 0.0171(18) 0.0154(17) -0.0040(14) 0.0094(16) -0.0023(16)
C15 0.039(2) 0.0205(19) 0.0179(17) -0.0025(16) 0.0124(16) 0.0015(17)
C1 0.032(2) 0.023(2) 0.025(2) 0.0018(17) 0.0116(16) 0.0036(18)
C10 0.030(2) 0.022(2) 0.028(2) 0.0042(17) 0.0097(17) 0.0087(16)
C12 0.038(2) 0.0190(19) 0.0202(17) 0.0007(15) 0.0148(16) 0.0000(16)
C16 0.043(2) 0.022(2) 0.0249(19) -0.0012(17) 0.0119(18) -0.0050(18)
C2 0.049(3) 0.0142(18) 0.0224(19) 0.0028(15) 0.0177(18) -0.0002(17)
C11 0.035(2) 0.0228(19) 0.032(2) 0.0007(18) 0.0151(17) 0.0023(18)
C17 0.033(2) 0.022(2) 0.032(2) 0.0001(17) 0.0107(17) -0.0043(17)
C9 0.032(2) 0.030(2) 0.034(2) 0.0034(19) 0.0115(18) 0.0027(18)
C3 0.049(3) 0.0132(17) 0.025(2) -0.0052(15) 0.0160(19) -0.0043(17)
C18 0.040(2) 0.036(2) 0.036(2) 0.009(2) 0.0160(19) 0.002(2)
C5 0.034(2) 0.024(2) 0.031(2) 0.0046(17) 0.0084(19) 0.0041(18)
C8 0.038(3) 0.048(3) 0.030(2) 0.003(2) 0.0063(19) 0.009(2)
C22 0.036(2) 0.033(2) 0.037(2) 0.009(2) 0.0110(19) -0.004(2)
C7 0.040(2) 0.029(2) 0.039(2) -0.004(2) 0.0003(19) 0.005(2)
C21 0.041(3) 0.033(2) 0.063(3) 0.006(2) 0.018(2) 0.001(2)
C6 0.038(2) 0.028(2) 0.042(2) 0.002(2) 0.003(2) -0.001(2)
C20 0.046(3) 0.044(3) 0.063(3) -0.007(3) 0.028(3) 0.001(2)
C19 0.050(3) 0.048(3) 0.044(3) 0.005(2) 0.027(2) 0.002(2)
 
_geom_special_details
;
 All esds (except the esd in the dihedral angle between two l.s. planes)
 are estimated using the full covariance matrix.  The cell esds are taken
 into account individually in the estimation of esds in distances, angles
 and torsion angles; correlations between esds in cell parameters are only
 used when they are defined by crystal symmetry.  An approximate (isotropic)
 treatment of cell esds is used for estimating esds involving l.s. planes.
;
 
loop_
 _geom_bond_atom_site_label_1
 _geom_bond_atom_site_label_2
 _geom_bond_distance
 _geom_bond_site_symmetry_2
 _geom_bond_publ_flag
O8 C14 1.236(5) . ?
O2 C1 1.290(5) . ?
O2 H3O 1.28(4) . ?
O5 C13 1.227(5) . ?
O4 C4 1.236(4) . ?
O6 C13 1.285(5) . ?
O6 H6O 1.08(6) . ?
O7 C14 1.276(5) . ?
O7 H6O 1.36(6) . ?
O1 C1 1.238(4) . ?
O3 C4 1.288(5) . ?
O3 H3O 1.14(4) . ?
N1 C12 1.489(5) . ?
N1 H1NB 0.93(4) . ?
N1 H1NC 0.96(4) . ?
N1 H1NA 0.93(6) . ?
N2 C15 1.488(5) . ?
N2 H2NB 0.95(4) . ?
N2 H2NC 0.93(4) . ?
N2 H2NA 0.90(5) . ?
C14 C15 1.527(5) . ?
C4 C3 1.493(6) . ?
C13 C12 1.536(5) . ?
C15 C16 1.537(6) . ?
C15 H15 1.0000 . ?
C1 C2 1.490(5) . ?
C10 C9 1.397(6) . ?
C10 C5 1.398(6) . ?
C10 C11 1.506(6) . ?
C12 C11 1.533(6) . ?
C12 H12 1.0000 . ?
C16 C17 1.513(6) . ?
C16 H16A 0.9900 . ?
C16 H16B 0.9900 . ?
C2 C3 1.330(5) . ?
C2 H2 0.9500 . ?
C11 H11A 0.9900 . ?
C11 H11B 0.9900 . ?
C17 C18 1.384(6) . ?
C17 C22 1.401(6) . ?
C9 C8 1.393(6) . ?
C9 H9 0.9500 . ?
C3 H3 0.9500 . ?
C18 C19 1.391(7) . ?
C18 H18 0.9500 . ?
C5 C6 1.391(6) . ?
C5 H5 0.9500 . ?
C8 C7 1.383(7) . ?
C8 H8 0.9500 . ?
C22 C21 1.393(7) . ?
C22 H22 0.9500 . ?
C7 C6 1.383(7) . ?
C7 H7 0.9500 . ?
C21 C20 1.378(7) . ?
C21 H21 0.9500 . ?
C6 H6 0.9500 . ?
C20 C19 1.374(7) . ?
C20 H20 0.9500 . ?
C19 H19 0.9500 . ?
 
loop_
 _geom_angle_atom_site_label_1
 _geom_angle_atom_site_label_2
 _geom_angle_atom_site_label_3
 _geom_angle
 _geom_angle_site_symmetry_1
 _geom_angle_site_symmetry_3
 _geom_angle_publ_flag
C1 O2 H3O 108(2) . . ?
C13 O6 H6O 116(3) . . ?
C14 O7 H6O 115(2) . . ?
C4 O3 H3O 109(2) . . ?
C12 N1 H1NB 113(2) . . ?
C12 N1 H1NC 115(2) . . ?
H1NB N1 H1NC 104(3) . . ?
C12 N1 H1NA 114(3) . . ?
H1NB N1 H1NA 108(4) . . ?
H1NC N1 H1NA 102(4) . . ?
C15 N2 H2NB 108(2) . . ?
C15 N2 H2NC 113(2) . . ?
H2NB N2 H2NC 109(4) . . ?
C15 N2 H2NA 112(3) . . ?
H2NB N2 H2NA 108(4) . . ?
H2NC N2 H2NA 107(3) . . ?
O8 C14 O7 125.7(4) . . ?
O8 C14 C15 120.7(3) . . ?
O7 C14 C15 113.5(3) . . ?
O4 C4 O3 122.0(4) . . ?
O4 C4 C3 118.6(4) . . ?
O3 C4 C3 119.5(3) . . ?
O5 C13 O6 126.7(3) . . ?
O5 C13 C12 121.2(3) . . ?
O6 C13 C12 112.2(3) . . ?
N2 C15 C14 109.1(3) . . ?
N2 C15 C16 111.2(3) . . ?
C14 C15 C16 113.2(3) . . ?
N2 C15 H15 107.7 . . ?
C14 C15 H15 107.7 . . ?
C16 C15 H15 107.7 . . ?
O1 C1 O2 121.3(4) . . ?
O1 C1 C2 119.1(4) . . ?
O2 C1 C2 119.6(3) . . ?
C9 C10 C5 118.0(4) . . ?
C9 C10 C11 121.2(4) . . ?
C5 C10 C11 120.7(4) . . ?
N1 C12 C11 111.5(3) . . ?
N1 C12 C13 109.1(3) . . ?
C11 C12 C13 113.0(3) . . ?
N1 C12 H12 107.7 . . ?
C11 C12 H12 107.7 . . ?
C13 C12 H12 107.7 . . ?
C17 C16 C15 114.8(3) . . ?
C17 C16 H16A 108.6 . . ?
C15 C16 H16A 108.6 . . ?
C17 C16 H16B 108.6 . . ?
C15 C16 H16B 108.6 . . ?
H16A C16 H16B 107.6 . . ?
C3 C2 C1 131.1(4) . . ?
C3 C2 H2 114.4 . . ?
C1 C2 H2 114.4 . . ?
C10 C11 C12 113.9(3) . . ?
C10 C11 H11A 108.8 . . ?
C12 C11 H11A 108.8 . . ?
C10 C11 H11B 108.8 . . ?
C12 C11 H11B 108.8 . . ?
H11A C11 H11B 107.7 . . ?
C18 C17 C22 118.3(4) . . ?
C18 C17 C16 121.1(4) . . ?
C22 C17 C16 120.6(4) . . ?
C8 C9 C10 121.4(4) . . ?
C8 C9 H9 119.3 . . ?
C10 C9 H9 119.3 . . ?
C2 C3 C4 130.4(4) . . ?
C2 C3 H3 114.8 . . ?
C4 C3 H3 114.8 . . ?
C17 C18 C19 121.3(4) . . ?
C17 C18 H18 119.3 . . ?
C19 C18 H18 119.3 . . ?
C6 C5 C10 120.5(4) . . ?
C6 C5 H5 119.8 . . ?
C10 C5 H5 119.8 . . ?
C7 C8 C9 119.5(4) . . ?
C7 C8 H8 120.3 . . ?
C9 C8 H8 120.3 . . ?
C21 C22 C17 120.0(4) . . ?
C21 C22 H22 120.0 . . ?
C17 C22 H22 120.0 . . ?
C8 C7 C6 120.0(4) . . ?
C8 C7 H7 120.0 . . ?
C6 C7 H7 120.0 . . ?
C20 C21 C22 120.5(5) . . ?
C20 C21 H21 119.8 . . ?
C22 C21 H21 119.8 . . ?
C7 C6 C5 120.5(4) . . ?
C7 C6 H6 119.7 . . ?
C5 C6 H6 119.7 . . ?
C19 C20 C21 120.1(5) . . ?
C19 C20 H20 120.0 . . ?
C21 C20 H20 120.0 . . ?
C20 C19 C18 119.8(5) . . ?
C20 C19 H19 120.1 . . ?
C18 C19 H19 120.1 . . ?
 
loop_
 _geom_torsion_atom_site_label_1
 _geom_torsion_atom_site_label_2
 _geom_torsion_atom_site_label_3
 _geom_torsion_atom_site_label_4
 _geom_torsion
 _geom_torsion_site_symmetry_1
 _geom_torsion_site_symmetry_2
 _geom_torsion_site_symmetry_3
 _geom_torsion_site_symmetry_4
 _geom_torsion_publ_flag
O8 C14 C15 N2 4.4(5) . . . . ?
O7 C14 C15 N2 -177.5(3) . . . . ?
O8 C14 C15 C16 128.8(4) . . . . ?
O7 C14 C15 C16 -53.1(4) . . . . ?
O5 C13 C12 N1 5.2(5) . . . . ?
O6 C13 C12 N1 -174.2(3) . . . . ?
O5 C13 C12 C11 129.9(4) . . . . ?
O6 C13 C12 C11 -49.6(4) . . . . ?
N2 C15 C16 C17 59.9(5) . . . . ?
C14 C15 C16 C17 -63.4(4) . . . . ?
O1 C1 C2 C3 -176.9(5) . . . . ?
O2 C1 C2 C3 3.9(7) . . . . ?
C9 C10 C11 C12 -89.3(5) . . . . ?
C5 C10 C11 C12 89.2(5) . . . . ?
N1 C12 C11 C10 60.9(5) . . . . ?
C13 C12 C11 C10 -62.5(4) . . . . ?
C15 C16 C17 C18 -92.6(5) . . . . ?
C15 C16 C17 C22 86.6(5) . . . . ?
C5 C10 C9 C8 -2.6(6) . . . . ?
C11 C10 C9 C8 176.0(4) . . . . ?
C1 C2 C3 C4 -0.6(8) . . . . ?
O4 C4 C3 C2 172.9(5) . . . . ?
O3 C4 C3 C2 -8.2(7) . . . . ?
C22 C17 C18 C19 0.2(7) . . . . ?
C16 C17 C18 C19 179.5(4) . . . . ?
C9 C10 C5 C6 1.2(6) . . . . ?
C11 C10 C5 C6 -177.3(4) . . . . ?
C10 C9 C8 C7 2.8(7) . . . . ?
C18 C17 C22 C21 -0.3(6) . . . . ?
C16 C17 C22 C21 -179.6(4) . . . . ?
C9 C8 C7 C6 -1.6(7) . . . . ?
C17 C22 C21 C20 0.1(7) . . . . ?
C8 C7 C6 C5 0.3(7) . . . . ?
C10 C5 C6 C7 -0.1(7) . . . . ?
C22 C21 C20 C19 0.1(8) . . . . ?
C21 C20 C19 C18 -0.2(8) . . . . ?
C17 C18 C19 C20 0.1(8) . . . . ?
 
_refine_diff_density_max    0.302
_refine_diff_density_min   -0.211
_refine_diff_density_rms    0.051

_shelx_res_file
;
TITL 20210608_DS_150K_MaLPhe_1_2_0m_a.res in P2(1)
    shelx.res
    created by SHELXL-2018/3 at 10:17:26 on 05-Sep-2021
CELL  0.71073  13.7482   5.4010  15.3787   90.000  109.028   90.000
ZERR     2.00   0.0017   0.0007   0.0019    0.000    0.004    0.000
LATT  -1
SYMM  - X, 1/2 + Y, - Z
SFAC  C    H    N    O
UNIT  44 52 4 16
MERG   2
OMIT     0.00 180.00
FMAP   2
PLAN   20
SIZE     0.100   0.350   0.400
ACTA
BOND
BOND   $H
CONF
LIST   6
L.S.  10
TEMP    -105.00
WGHT    0.033600    0.879600
FVAR       1.23900
O8    4    0.898222    0.443602    0.602729    11.00000    0.04220    0.01519 =
         0.02139   -0.00054    0.01082   -0.00240
O2    4    0.910350    0.754411    1.059881    11.00000    0.04983    0.01733 =
         0.02711   -0.00257    0.01838   -0.00284
O5    4    0.916669    0.567862    0.346316    11.00000    0.04357    0.01596 =
         0.02721   -0.00040    0.01776    0.00102
O4    4    0.875473    0.544306    0.780792    11.00000    0.05039    0.02555 =
         0.02109    0.00264    0.01799   -0.00203
O6    4    0.793423    0.701828    0.401274    11.00000    0.04211    0.02137 =
         0.02450    0.00418    0.01912    0.00308
O7    4    0.787467    0.299261    0.471462    11.00000    0.04742    0.02535 =
         0.01867    0.00264    0.01089   -0.00567
O1    4    0.900443    0.461675    1.156395    11.00000    0.05008    0.02878 =
         0.01977    0.00094    0.01617    0.00119
O3    4    0.889386    0.793676    0.897983    11.00000    0.06557    0.01683 =
         0.02627    0.00233    0.02172   -0.00141
N1    3    0.917354    0.987639    0.252996    11.00000    0.03486    0.01591 =
         0.01975    0.00188    0.01238   -0.00163
N2    3    0.897930    0.027940    0.696506    11.00000    0.03636    0.01969 =
         0.02116    0.00581    0.01370    0.00109
C14   1    0.842031    0.280429    0.556055    11.00000    0.04191    0.01600 =
         0.01797   -0.00033    0.01736    0.00364
C4    1    0.876504    0.577487    0.860642    11.00000    0.03400    0.02628 =
         0.02208    0.00091    0.01179    0.00249
C13   1    0.856763    0.725481    0.356080    11.00000    0.03483    0.01714 =
         0.01541   -0.00402    0.00943   -0.00225
C15   1    0.835564    0.026082    0.597166    11.00000    0.03896    0.02051 =
         0.01790   -0.00249    0.01238    0.00154
AFIX  13
H15   2    0.867238   -0.096805    0.565789    11.00000   -1.20000
AFIX   0
C1    1    0.894614    0.527469    1.077742    11.00000    0.03172    0.02297 =
         0.02456    0.00185    0.01163    0.00358
C10   1    0.687670    0.893186    0.177140    11.00000    0.02964    0.02203 =
         0.02830    0.00417    0.00968    0.00874
C12   1    0.850144    0.982563    0.311765    11.00000    0.03811    0.01901 =
         0.02024    0.00070    0.01481    0.00000
AFIX  13
H12   2    0.878034    1.105685    0.362355    11.00000   -1.20000
AFIX   0
C16   1    0.724559   -0.057481    0.582811    11.00000    0.04305    0.02162 =
         0.02487   -0.00116    0.01190   -0.00498
AFIX  23
H16A  2    0.686462   -0.060573    0.515973    11.00000   -1.20000
H16B  2    0.726167   -0.228844    0.606089    11.00000   -1.20000
AFIX   0
C2    1    0.867544    0.340792    1.002312    11.00000    0.04922    0.01419 =
         0.02241    0.00280    0.01770   -0.00023
AFIX  43
H2    2    0.852823    0.180528    1.020232    11.00000   -1.20000
AFIX   0
C11   1    0.739589    1.059408    0.257559    11.00000    0.03479    0.02278 =
         0.03192    0.00068    0.01514    0.00226
AFIX  23
H11A  2    0.698450    1.060270    0.299746    11.00000   -1.20000
H11B  2    0.740397    1.230488    0.234693    11.00000   -1.20000
AFIX   0
C17   1    0.666146    0.103437    0.629397    11.00000    0.03332    0.02233 =
         0.03238    0.00013    0.01073   -0.00431
C9    1    0.694975    0.939057    0.090076    11.00000    0.03176    0.03011 =
         0.03449    0.00344    0.01154    0.00273
AFIX  43
H9    2    0.729652    1.083504    0.080597    11.00000   -1.20000
AFIX   0
C3    1    0.860422    0.359701    0.914225    11.00000    0.04906    0.01318 =
         0.02504   -0.00516    0.01596   -0.00432
AFIX  43
H3    2    0.842177    0.210779    0.879876    11.00000   -1.20000
AFIX   0
C18   1    0.664653    0.048723    0.716840    11.00000    0.03984    0.03599 =
         0.03556    0.00871    0.01598    0.00245
AFIX  43
H18   2    0.700464   -0.093034    0.747808    11.00000   -1.20000
AFIX   0
C5    1    0.632552    0.684610    0.188130    11.00000    0.03430    0.02417 =
         0.03112    0.00459    0.00844    0.00413
AFIX  43
H5    2    0.625241    0.650861    0.246309    11.00000   -1.20000
AFIX   0
C8    1    0.652511    0.777571    0.016858    11.00000    0.03845    0.04833 =
         0.03003    0.00349    0.00625    0.00942
AFIX  43
H8    2    0.660856    0.807926   -0.041146    11.00000   -1.20000
AFIX   0
C22   1    0.613048    0.313762    0.585169    11.00000    0.03571    0.03312 =
         0.03703    0.00940    0.01099   -0.00379
AFIX  43
H22   2    0.613111    0.355765    0.525201    11.00000   -1.20000
AFIX   0
C7    1    0.598114    0.572735    0.029257    11.00000    0.03964    0.02892 =
         0.03925   -0.00434    0.00034    0.00525
AFIX  43
H7    2    0.567459    0.464015   -0.020749    11.00000   -1.20000
AFIX   0
C21   1    0.560139    0.461398    0.629086    11.00000    0.04050    0.03291 =
         0.06313    0.00634    0.01846    0.00108
AFIX  43
H21   2    0.524136    0.603740    0.598815    11.00000   -1.20000
AFIX   0
C6    1    0.588336    0.526138    0.114482    11.00000    0.03843    0.02779 =
         0.04243    0.00155    0.00283   -0.00091
AFIX  43
H6    2    0.551148    0.384858    0.122781    11.00000   -1.20000
AFIX   0
C20   1    0.559671    0.402386    0.716109    11.00000    0.04620    0.04368 =
         0.06349   -0.00707    0.02800    0.00141
AFIX  43
H20   2    0.523291    0.503743    0.745550    11.00000   -1.20000
AFIX   0
C19   1    0.611760    0.197131    0.760340    11.00000    0.05019    0.04818 =
         0.04426    0.00492    0.02675    0.00207
AFIX  43
H19   2    0.611672    0.156641    0.820429    11.00000   -1.20000
AFIX   0
H1NB  2    0.907142    0.853928    0.213210    11.00000    0.00658
H2NB  2    0.968674    0.037714    0.701429    11.00000    0.01610
H2NC  2    0.881722    0.158741    0.728115    11.00000    0.01635
H1NC  2    0.990115    0.982363    0.286397    11.00000    0.00865
H1NA  2    0.911280    1.131797    0.218262    11.00000    0.05650
H2NA  2    0.889155   -0.110864    0.724939    11.00000    0.03006
H6O   2    0.792078    0.522247    0.432377    11.00000    0.05500
H3O   2    0.898737    0.772054    0.973888    11.00000    0.02629
HKLF    4


REM  20210608_DS_150K_MaLPhe_1_2_0m_a.res in P2(1)
REM wR2 = 0.1159, GooF = S = 1.067, Restrained GooF = 1.067 for all data
REM R1 = 0.0497 for 3760 Fo > 4sig(Fo) and 0.0631 for all 4434 data
REM 321 parameters refined using 1 restraints

END

WGHT      0.0329      0.8872

REM Highest difference peak  0.302,  deepest hole -0.211,  1-sigma level  0.051
Q1    1   0.9798  0.4443  0.6265  11.00000  0.05    0.30
Q2    1   0.8238  0.4683  1.1287  11.00000  0.05    0.30
Q3    1   0.8319  0.7468  1.0319  11.00000  0.05    0.29
Q4    1   0.9998  0.5656  0.3694  11.00000  0.05    0.28
Q5    1   0.8829  0.7050  0.4265  11.00000  0.05    0.28
Q6    1   0.7076  0.7108  0.3676  11.00000  0.05    0.27
Q7    1   0.8446  0.5808  0.3174  11.00000  0.05    0.25
Q8    1   0.8174  0.4364  0.5805  11.00000  0.05    0.25
Q9    1   0.9174  0.3016  0.5743  11.00000  0.05    0.25
Q10   1   0.8399  0.9923  0.2270  11.00000  0.05    0.22
Q11   1   0.9582  0.5539  0.8109  11.00000  0.05    0.22
Q12   1   0.9839  0.4661  1.1809  11.00000  0.05    0.22
Q13   1   0.8769  0.4744  0.8995  11.00000  0.05    0.22
Q14   1   0.8914  0.2535  0.5031  11.00000  0.05    0.21
Q15   1   0.9366  0.7128  0.3801  11.00000  0.05    0.21
Q16   1   0.9022  0.8905  1.0905  11.00000  0.05    0.21
Q17   1   0.7824  0.3420  0.9711  11.00000  0.05    0.20
Q18   1   0.8056  0.5152  1.0412  11.00000  0.05    0.20
Q19   1   0.7970  0.8084  0.8599  11.00000  0.05    0.20
Q20   1   0.9781  0.7778  0.9171  11.00000  0.05    0.19
;
_shelx_res_checksum   76110

_shelx_hkl_file
;
   2   0   0 1335.67   67.49
   2   0   0 1480.75   67.19
   2   0   0 1390.86   67.19
  -2   0   0 1481.55   67.19
  -2   0   0 1363.06   67.29
  -2   0   0 1339.07   67.39
   3   0   0 3485.35  166.88
   3   0   0 3291.97  167.38
   3   0   0 3694.23  166.98
  -3   0   0 3494.35  167.28
  -3   0   0 3644.04  166.88
  -3   0   0 3356.16  166.88
  -5   0   0 6960.50  321.77
   5   0   0 6641.74  322.57
   5   0   0 6407.76  321.77
   5   0   0 6847.62  321.77
  -5   0   0 6966.60  322.47
  -5   0   0 6659.83  321.77
   6   0   0 1969.60   93.39
   6   0   0 1774.22   93.29
   6   0   0 1852.81   94.29
  -6   0   0 2012.50   93.19
  -6   0   0 1901.91   93.29
  -6   0   0 1980.70   94.19
  -7   0   0  132.49   15.90
  -7   0   0  127.69   15.30
   7   0   0  107.69   12.30
  -7   0   0  107.19   13.60
   7   0   0  114.69   13.90
   7   0   0  120.99   12.10
  -8   0   0  379.46   25.10
   8   0   0  345.87   24.30
   8   0   0  397.36   24.40
  -8   0   0  376.56   24.40
  -8   0   0  380.76   23.30
   8   0   0  400.36   26.40
   9   0   0 1125.69   53.89
  -9   0   0 1014.90   52.99
  -9   0   0 1044.60   53.59
  -9   0   0 1023.50   54.39
   9   0   0 1073.99   55.39
   9   0   0  939.21   53.69
 -10   0   0  479.35   30.50
  10   0   0  489.15   32.30
 -10   0   0  488.45   29.30
  10   0   0  512.45   30.90
  10   0   0  473.45   30.90
 -10   0   0  502.45   31.30
  11   0   0   41.40   16.30
 -11   0   0   24.50   13.70
 -11   0   0   37.00   11.90
  11   0   0   32.80   13.50
 -12   0   0    7.70   15.60
  12   0   0  -12.10   13.50
 -12   0   0    3.70   12.50
 -12   0   0  -21.30   13.40
  12   0   0    2.30   14.00
  12   0   0  -10.30   22.70
  13   0   0   -2.30   14.80
  13   0   0    5.00   18.10
  13   0   0  -11.20   19.20
 -13   0   0    3.70   22.60
 -13   0   0    0.10   14.60
 -13   0   0    0.80   15.40
 -14   0   0   16.00   14.10
 -14   0   0    7.90   16.70
  14   0   0   13.10   19.30
  14   0   0   20.10   17.50
 -14   0   0    9.30   15.60
  14   0   0   31.80   16.50
 -15   0   0    9.80   15.00
 -15   0   0   -5.50   16.80
  15   0   0  -30.20   16.70
  15   0   0   -4.70   17.30
 -15   0   0   11.00   18.20
 -16   0   0   46.20   22.00
  16   0   0   77.09   20.70
 -16   0   0   79.79   16.90
  16   0   0   56.29   20.30
 -16   0   0   46.50   18.50
   0  -1   0   -2.20    3.70
   0  -1   0    1.10    5.00
   0   1   0    3.50    4.80
   0   1   0    0.10    3.90
  -1  -1   0  204.18   14.50
  -1  -1   0  226.28   13.50
  -1  -1   0  247.48   13.80
   1  -1   0  207.68   12.80
   1  -1   0  213.88   12.90
   1   1   0  236.18   14.00
  -1   1   0  221.08   13.40
   1   1   0  224.98   14.30
   1   1   0  243.78   14.10
   2  -1   0 2001.60   98.69
   2  -1   0 1883.61   98.69
  -2  -1   0 2155.48   99.09
  -2  -1   0 2055.19   99.29
  -2  -1   0 2151.68   99.59
   2   1   0 2048.79   99.29
   2   1   0 2093.79   99.59
  -2   1   0 1930.91   98.69
   2   1   0 2217.48   99.19
  -2   1   0 2088.69   98.39
   3  -1   0 9999.00  462.95
  -3   1   0 9470.85  462.95
  -4  -1   0 5905.91  265.47
   4  -1   0 5545.15  264.97
   4  -1   0 5350.96  265.17
  -4  -1   0 5786.92  266.07
  -4  -1   0 5748.02  266.57
   4  -1   0 5375.06  264.97
   4   1   0 5688.23  265.37
  -4   1   0 5460.35  265.07
   4   1   0 5098.49  265.97
   4   1   0 5734.63  265.67
  -4   1   0 5457.65  265.07
   5  -1   0  200.58   16.70
  -5  -1   0  242.78   16.40
   5  -1   0  218.58   15.90
  -5  -1   0  226.38   18.30
   5  -1   0  254.07   15.40
  -5  -1   0  217.88   17.90
   5   1   0  182.08   17.40
  -5   1   0  209.18   15.80
   5   1   0  225.38   17.20
  -5   1   0  220.58   15.70
   5   1   0  174.38   19.00
   6  -1   0   67.29   11.00
  -6  -1   0   86.89   11.10
  -6  -1   0   74.19   12.50
   6  -1   0   81.79    9.20
  -6  -1   0   74.59   10.10
   6  -1   0   61.29    9.70
   6   1   0   82.99   10.90
  -6   1   0   64.49    8.80
   6   1   0   61.19   13.20
  -6   1   0   74.79   10.10
  -6   1   0   65.39    9.80
   6   1   0   57.59   10.40
   7  -1   0 1594.04   78.69
   7  -1   0 1470.75   78.89
   7  -1   0 1655.53   79.79
  -7  -1   0 1659.53   80.59
  -7  -1   0 1657.53   79.49
  -7  -1   0 1603.24   79.19
   7   1   0 1461.05   80.49
   7   1   0 1686.33   79.59
  -7   1   0 1620.94   78.79
  -7   1   0 1697.33   79.39
  -7   1   0 1647.14   78.79
   7   1   0 1519.55   79.49
   8  -1   0  507.15   30.30
  -8  -1   0  568.34   34.80
   8  -1   0  496.35   28.70
  -8  -1   0  506.25   30.10
   8  -1   0  473.25   29.00
  -8  -1   0  499.35   31.30
  -8   1   0  514.65   28.50
  -8   1   0  522.75   29.20
   8   1   0  507.45   32.20
   8   1   0  449.95   30.00
  -8   1   0  544.15   29.70
   8   1   0  511.15   30.50
   9  -1   0   91.79   12.80
  -9  -1   0   91.09   14.70
  -9  -1   0  101.49   12.70
   9  -1   0  100.39   12.40
  -9  -1   0  127.39   14.70
   9  -1   0  101.99   14.60
  -9   1   0   83.89   13.20
   9   1   0   85.79   13.30
  -9   1   0  130.39   16.20
   9   1   0  112.49   15.30
  -9   1   0  131.79   14.30
   9   1   0   82.09   14.20
  10  -1   0  196.28   21.30
 -10  -1   0  173.28   21.00
  10  -1   0  183.88   18.70
  10  -1   0  159.48   19.00
 -10  -1   0  164.58   20.40
 -10  -1   0  169.38   18.30
 -10   1   0  141.29   19.00
 -10   1   0  173.68   19.50
 -10   1   0  181.08   17.10
  10   1   0  182.08   23.50
  10   1   0  203.48   20.40
  10   1   0  157.38   20.00
 -11  -1   0  220.38   27.30
  11  -1   0  200.28   21.10
 -11  -1   0  203.28   20.30
  11  -1   0  194.08   20.80
  11  -1   0  195.18   23.10
 -11   1   0  133.99   26.80
  11   1   0  186.88   24.50
  11   1   0  135.49   29.70
 -11   1   0  211.68   21.50
  11   1   0  220.28   22.50
 -11   1   0  194.38   18.70
 -12  -1   0   64.09   14.40
 -12  -1   0   55.29   15.90
 -12  -1   0   64.09   17.10
  12  -1   0   36.30   14.90
  12  -1   0   71.59   15.20
  12   1   0   62.99   15.70
 -12   1   0   15.50   14.00
  12   1   0   74.89   16.30
 -12   1   0   40.90   14.30
 -12   1   0   51.09   13.20
  12   1   0   78.89   18.90
 -13  -1   0   70.89   15.90
 -13  -1   0   63.19   17.20
  13  -1   0   56.79   16.00
 -13  -1   0   70.19   17.80
  13  -1   0  117.39   17.20
  13   1   0   51.99   16.60
  13   1   0   99.39   18.50
 -13   1   0   32.30   15.80
 -13   1   0   48.40   15.40
  13   1   0  109.19   20.80
 -13   1   0   52.19   14.40
  14  -1   0   20.50   16.60
 -14  -1   0   11.10   16.00
  14  -1   0   10.90   16.60
 -14  -1   0   15.50   17.10
 -14  -1   0   -3.00   17.20
 -14   1   0    5.90   12.50
  14   1   0   20.10   17.20
  14   1   0   21.60   19.40
 -14   1   0    5.60   16.20
  14   1   0   23.90   17.50
 -14   1   0    9.80   15.20
 -15  -1   0   10.00   23.30
 -15  -1   0    5.00   18.00
 -15  -1   0   10.40   15.80
  15  -1   0   18.70   17.60
  15   1   0   15.40   18.70
 -15   1   0   16.00   18.50
 -15   1   0   12.20   16.60
  15   1   0   46.90   22.10
  15   1   0   36.60   19.10
 -15   1   0   -8.40   17.50
  16  -1   0   29.00   19.50
 -16  -1   0    3.20   17.90
 -16  -1   0  -10.80   18.00
  16  -1   0   37.00   17.40
 -16  -1   0   11.60   16.00
  16   1   0   43.60   21.60
 -16   1   0   35.60   17.70
 -16   1   0    6.20   18.70
 -16   1   0   27.30   15.00
  16   1   0   34.10   19.70
   0  -2   0 3221.18  157.08
   0  -2   0 3383.46  156.48
   0   2   0 3150.68  156.88
   0   2   0 3303.57  156.88
   0   2   0 3324.57  156.48
  -1  -2   0  348.57   20.30
   1  -2   0  358.56   17.50
   1  -2   0  355.86   19.80
  -1  -2   0  345.57   21.50
  -1  -2   0  350.36   20.00
   1   2   0  353.76   20.40
   1   2   0  340.57   20.00
   1   2   0  350.46   21.20
  -1   2   0  359.16   19.50
   2  -2   0  696.53   34.90
  -2  -2   0  726.73   35.90
  -2  -2   0  683.13   36.30
   2  -2   0  671.63   34.80
  -2  -2   0  663.03   35.50
  -2   2   0  660.23   35.20
   2   2   0  706.33   36.00
   2   2   0  712.83   35.80
   2   2   0  683.43   36.20
  -3  -2   0  167.68   14.50
   3  -2   0  159.88   12.40
  -3  -2   0  174.28   15.70
   3  -2   0  168.98   12.60
  -3  -2   0  144.69   18.00
   3   2   0  186.98   15.10
   3   2   0  153.68   16.20
   3   2   0  161.18   20.60
  -3   2   0  167.48   13.50
  -4  -2   0  226.38   18.60
   4  -2   0  243.28   15.30
  -4  -2   0  235.38   18.80
   4  -2   0  249.97   15.00
  -4  -2   0  246.18   17.10
   4   2   0  257.57   17.60
  -4   2   0  223.98   15.70
  -4   2   0  186.98   13.00
   4   2   0  215.18   18.30
   4   2   0  229.68   19.60
  -5  -2   0 3176.38  146.19
   5  -2   0 3112.49  144.39
  -5  -2   0 3159.28  145.49
  -5  -2   0 3066.79  145.19
   5  -2   0 2881.81  144.29
  -5   2   0 2931.01  143.99
   5   2   0 2800.92  145.89
  -5   2   0 2914.01  144.39
   5   2   0 3138.79  145.39
   5   2   0 2893.71  145.29
  -6  -2   0  771.32   40.10
   6  -2   0  806.12   38.90
   6  -2   0  741.93   39.00
  -6  -2   0  807.72   41.00
  -6   2   0  759.42   39.10
   6   2   0  801.32   40.40
  -6   2   0  702.13   38.50
   6   2   0  722.53   41.70
   6   2   0  730.03   40.70
  -7  -2   0  959.60   50.59
   7  -2   0  877.21   47.70
  -7  -2   0  978.20   49.80
   7  -2   0  997.00   47.80
  -7  -2   0  944.81   48.80
  -7   2   0  919.41   47.80
  -7   2   0  950.60   47.90
   7   2   0  915.71   49.60
   7   2   0  973.60   49.40
   7   2   0  923.91   50.89
   8  -2   0  136.29   15.00
  -8  -2   0  131.19   16.10
  -8  -2   0  153.68   16.00
   8  -2   0  149.29   14.70
  -8  -2   0  115.19   15.20
   8   2   0  131.19   14.80
  -8   2   0  103.69   14.30
   8   2   0  134.39   15.00
   8   2   0  145.39   18.10
  -8   2   0  152.88   15.20
  -9  -2   0  145.49   20.20
   9  -2   0  115.09   13.80
  -9  -2   0  113.89   13.90
  -9  -2   0  156.78   20.00
   9  -2   0  141.89   16.30
  -9   2   0  148.89   16.40
   9   2   0  114.29   15.30
   9   2   0  135.59   19.00
   9   2   0  122.19   15.20
  -9   2   0  118.79   15.80
  10  -2   0   77.39   13.30
 -10  -2   0   88.79   13.80
 -10  -2   0   90.99   16.20
 -10  -2   0  100.59   22.30
 -10   2   0  121.19   16.60
  10   2   0  122.19   31.00
  10   2   0  104.69   15.50
  10   2   0  175.68   20.10
 -11  -2   0   37.90   15.20
 -11  -2   0   44.40   13.10
  11  -2   0   26.70   13.20
  11  -2   0   36.50   12.70
 -11  -2   0   35.00   16.00
  11   2   0   36.90   14.60
  11   2   0   29.70   14.70
 -11   2   0   36.20   13.10
 -11   2   0   42.00   13.20
 -11   2   0   60.39   17.00
 -12  -2   0  204.08   25.20
 -12  -2   0  200.38   23.40
  12  -2   0  201.48   21.70
  12  -2   0  197.78   22.90
 -12  -2   0  178.88   26.50
 -12   2   0  213.08   23.20
 -12   2   0  183.98   20.30
  12   2   0  216.48   27.70
  12   2   0  201.08   25.00
  12   2   0  210.08   25.10
 -12   2   0  198.48   22.20
 -13  -2   0   26.00   17.30
  13  -2   0   55.59   16.10
 -13  -2   0   52.89   16.10
 -13  -2   0   37.80   18.80
 -13   2   0   28.90   14.90
 -13   2   0   52.79   16.50
  13   2   0   81.89   20.20
 -13   2   0   75.39   15.20
  13   2   0   47.60   18.50
  13   2   0   45.20   20.20
  14  -2   0  116.79   18.60
 -14  -2   0   58.09   19.00
 -14  -2   0   72.79   20.50
 -14  -2   0   72.49   16.70
  14  -2   0   60.49   16.70
 -14   2   0   53.89   15.60
 -14   2   0   73.09   18.70
  14   2   0   75.49   19.60
  14   2   0   75.69   22.40
 -14   2   0   41.10   15.90
  14   2   0   53.69   19.80
 -15  -2   0   76.49   19.90
  15  -2   0   47.40   18.90
 -15  -2   0   51.39   21.50
 -15  -2   0   30.00   22.20
  15  -2   0   39.60   17.30
 -15   2   0   58.89   19.10
  15   2   0   35.50   22.60
  15   2   0   49.40   21.40
 -15   2   0   64.39   18.90
 -15   2   0   35.70   16.40
  15   2   0   51.29   25.50
   0  -3   0    8.90    8.30
   0  -3   0    8.30    8.10
   0  -3   0    6.20    5.70
   0   3   0    8.00    7.30
   0   3   0   25.20    7.70
  -1  -3   0  557.64   32.40
   1  -3   0  635.84   33.10
  -1  -3   0  653.83   33.80
   1  -3   0  625.24   32.60
   1  -3   0  556.64   30.30
   1   3   0  654.33   33.10
   1   3   0  632.84   32.20
  -1   3   0  643.04   32.70
  -1   3   0  624.34   32.40
  -2  -3   0  258.07   18.60
  -2  -3   0  281.97   21.80
   2  -3   0  281.17   17.10
  -2  -3   0  224.18   18.00
  -2   3   0  251.57   16.80
   2   3   0  266.57   19.40
   2   3   0  272.17   18.20
   2   3   0  259.17   18.20
   3  -3   0  854.61   43.50
  -3  -3   0  903.71   45.30
  -3  -3   0  811.32   44.50
  -3  -3   0  870.11   44.90
   3   3   0  888.11   45.20
   3   3   0  848.52   44.50
   3   3   0  854.71   44.80
   4  -3   0  278.97   17.70
   4  -3   0  282.37   18.00
  -4  -3   0  298.07   19.80
  -4  -3   0  291.37   21.30
  -4  -3   0  306.47   21.30
   4   3   0  306.17   21.00
   4   3   0  285.57   20.10
  -4   3   0  247.18   19.10
   4   3   0  256.07   20.80
   5  -3   0   94.89   11.80
  -5  -3   0  108.09   13.40
   5  -3   0   92.09   11.50
  -5  -3   0  105.69   14.40
  -5  -3   0   76.09   11.20
   5   3   0  105.79   13.90
  -5   3   0  100.49   11.00
   5   3   0   91.79   12.60
   5   3   0   78.49   11.70
  -6  -3   0  204.28   18.80
  -6  -3   0  221.18   20.60
   6  -3   0  217.88   16.50
   6  -3   0  256.07   16.30
  -6  -3   0  222.08   20.90
  -6   3   0  225.48   17.40
   6   3   0  233.88   22.00
   6   3   0  222.58   20.40
   6   3   0  232.18   19.60
   7  -3   0  188.08   14.90
  -7  -3   0  149.99   17.40
  -7  -3   0  142.89   20.40
   7  -3   0  154.98   14.90
  -7  -3   0  172.48   19.90
  -7   3   0  119.69   12.30
   7   3   0  188.88   20.50
   7   3   0  154.68   18.40
  -7   3   0  170.98   16.20
   7   3   0  153.68   16.20
  -7   3   0  142.69   11.50
  -8  -3   0  622.94   37.10
   8  -3   0  645.24   31.60
   8  -3   0  513.95   31.30
  -8  -3   0  553.74   33.40
  -8  -3   0  568.94   35.20
  -8   3   0  556.24   32.10
   8   3   0  528.25   35.00
  -8   3   0  456.35   30.40
   8   3   0  610.64   37.30
  -8   3   0  531.95   30.70
   8   3   0  590.14   34.20
  -9  -3   0  110.99   15.40
  -9  -3   0  153.18   20.70
  -9  -3   0  157.18   18.60
   9  -3   0  138.29   16.20
   9  -3   0  166.78   16.20
  -9   3   0  113.59   14.60
   9   3   0  100.49   16.70
  -9   3   0  143.29   14.20
   9   3   0  156.58   26.00
   9   3   0  146.19   17.80
  10  -3   0   84.29   13.60
  10  -3   0  101.09   13.20
 -10  -3   0   65.79   17.20
 -10  -3   0   96.69   18.70
 -10  -3   0  100.79   15.90
 -10   3   0   91.29   12.90
  10   3   0   90.89   17.60
 -10   3   0  102.19   13.10
  10   3   0   95.19   16.30
  10   3   0   92.59   19.10
 -10   3   0  108.29   14.30
  11  -3   0   81.29   15.20
  11  -3   0  133.69   15.20
 -11  -3   0  124.19   17.90
 -11  -3   0   92.39   18.50
 -11  -3   0  137.79   21.50
 -11   3   0  116.09   15.10
 -11   3   0  114.99   15.60
  11   3   0  102.39   17.80
  11   3   0  169.08   30.40
  11   3   0  121.89   19.20
 -11   3   0  119.09   14.60
 -12  -3   0  315.97   28.50
  12  -3   0  403.66   26.50
 -12  -3   0  315.97   32.40
 -12  -3   0  316.27   30.30
 -12   3   0  264.37   23.90
  12   3   0  343.37   32.40
  12   3   0  360.26   30.70
 -12   3   0  366.56   26.70
 -12   3   0  319.17   25.90
  12   3   0  360.46   31.30
 -13  -3   0   95.49   19.10
  13  -3   0  109.19   16.70
  13  -3   0  103.39   17.20
 -13  -3   0   80.39   20.80
 -13  -3   0   94.79   20.60
  13   3   0  122.19   21.20
 -13   3   0   93.79   14.70
 -13   3   0   91.69   16.70
 -13   3   0  102.89   16.30
  13   3   0  130.49   24.20
  13   3   0   82.59   19.40
 -14  -3   0   33.70   22.60
 -14  -3   0    8.00   20.80
  14  -3   0   23.40   15.80
 -14   3   0    7.80   13.00
  14   3   0   45.80   19.80
 -14   3   0   36.40   16.20
  14   3   0   31.50   21.30
   0  -4   0 1710.63   86.39
   0  -4   0 1569.54   81.59
   0  -4   0 1643.24   80.09
   0   4   0 1745.83   81.69
   0   4   0 1598.04   81.59
   1  -4   0  936.51   46.80
   1  -4   0  936.71   46.40
  -1  -4   0  800.22   46.60
  -1  -4   0  812.82   45.10
  -1  -4   0  892.11   47.20
  -1   4   0  931.01   46.20
   1   4   0  887.31   46.40
  -1   4   0  961.00   46.00
   1   4   0  887.31   46.40
  -2  -4   0   33.50   11.20
  -2  -4   0   21.80    9.40
   2  -4   0   37.70    9.90
   2   4   0   37.70    9.60
  -2   4   0   51.59    8.90
   2   4   0   15.20   10.00
  -3  -4   0  402.66   26.10
  -3  -4   0  380.46   25.30
   3  -4   0  386.06   23.80
   3   4   0  410.66   25.50
  -3   4   0  368.16   25.50
  -3   4   0  377.16   24.00
   3   4   0  389.16   25.20
   4  -4   0  616.64   33.20
  -4  -4   0  602.64   36.00
  -4  -4   0  558.64   34.80
  -4  -4   0  648.04   36.20
   4   4   0  617.14   34.90
   4   4   0  616.64   35.40
   4   4   0  607.94   35.80
  -5  -4   0   49.20   13.40
  -5  -4   0   80.29   13.00
  -5  -4   0   73.49   14.30
   5  -4   0   48.70   10.30
   5   4   0   94.59   15.20
   5   4   0   76.29   13.20
   5   4   0   45.40   13.40
  -6  -4   0  118.79   16.10
   6  -4   0  124.39   15.00
  -6  -4   0  122.89   17.80
  -6  -4   0  130.99   15.10
  -6   4   0  108.49   13.00
   6   4   0  159.28   21.10
   6   4   0  129.49   15.90
   6   4   0  118.99   16.40
   7  -4   0    6.70   10.10
  -7  -4   0   26.00   12.20
  -7  -4   0   15.30   15.20
  -7  -4   0   33.80   14.30
   7  -4   0   23.80    9.80
   7   4   0   15.40   14.20
  -7   4   0   24.90   12.80
   7   4   0   28.20   14.10
  -7   4   0   22.00    9.40
   7   4   0   22.50   14.10
   8  -4   0  133.09   15.80
  -8  -4   0  121.09   20.00
   8  -4   0   92.09   13.40
  -8  -4   0  108.99   16.10
  -8  -4   0  110.59   17.70
   8   4   0  146.29   18.50
   8   4   0   99.49   16.10
   8   4   0  120.99   18.40
  -8   4   0  145.39   16.00
  -8   4   0  123.89   13.90
   9  -4   0   28.30   11.10
  -9  -4   0   27.40   19.20
  -9  -4   0   -0.70   16.20
  -9  -4   0   24.70   16.50
   9  -4   0   16.90   11.30
   9   4   0   36.10   22.60
   9   4   0   25.10   18.30
  -9   4   0   24.40   10.50
   9   4   0   25.50   16.60
  -9   4   0    3.60   12.80
 -10  -4   0   28.60   14.70
  10  -4   0   42.00   11.80
 -10  -4   0   58.59   19.00
 -10  -4   0   24.60   17.50
 -10   4   0   27.20   11.50
  10   4   0    6.00   15.90
 -10   4   0   35.20   13.80
  10   4   0   43.60   17.70
  10   4   0   24.50   16.00
  11  -4   0  148.99   18.50
 -11  -4   0  150.48   20.10
  11  -4   0  113.99   17.40
 -11  -4   0  162.48   24.40
 -11  -4   0   97.69   21.10
  11   4   0  130.09   20.70
  11   4   0  183.58   25.40
  11   4   0  160.78   22.20
 -11   4   0  164.58   20.30
 -11   4   0  147.89   17.80
 -12  -4   0   89.19   20.50
 -12  -4   0   97.99   19.20
  12  -4   0   87.99   18.00
  12  -4   0   82.79   14.70
 -12  -4   0   44.60   19.10
  12   4   0  122.89   22.60
 -12   4   0   92.69   16.00
  12   4   0  102.29   20.50
 -12   4   0   67.09   15.10
  12   4   0   75.39   21.80
 -13  -4   0    2.80   22.90
 -13  -4   0   13.60   18.60
  13  -4   0   16.90   14.60
  13  -4   0   20.70   14.30
 -13   4   0   31.10   10.30
 -13   4   0   24.90   15.80
  13   4   0   41.70   19.90
 -13   4   0   22.60   13.40
  13   4   0   35.30   20.70
   0  -5   0   52.79   12.10
   0  -5   0   16.10   12.60
   0   5   0   33.20   11.00
   0   5   0   19.20   11.60
  -1  -5   0  208.28   20.50
  -1  -5   0  239.48   21.40
   1  -5   0  188.88   19.30
  -1  -5   0  190.78   16.30
   1  -5   0  203.68   20.50
  -1   5   0  199.58   18.80
   1   5   0  232.88   19.60
  -1   5   0  230.18   19.40
   1   5   0  252.57   19.90
  -2  -5   0  339.67   25.00
   2  -5   0  330.67   24.00
  -2  -5   0  248.08   21.50
   2  -5   0  314.37   22.60
  -2  -5   0  328.07   25.10
  -2   5   0  311.47   23.10
  -2   5   0  311.57   22.40
   2   5   0  328.07   23.90
  -3  -5   0  377.56   27.50
  -3  -5   0  437.76   29.80
   3  -5   0  452.45   28.20
   3  -5   0  550.14   36.40
  -3   5   0  436.36   27.30
   3   5   0  425.36   28.60
  -3   5   0  410.26   27.10
   3   5   0  410.46   28.70
  -4  -5   0   37.00   14.40
  -4  -5   0   18.50   13.10
   4  -5   0   49.80   11.60
   4  -5   0   52.39   12.40
  -4   5   0   66.79   12.40
   4   5   0   39.50   13.80
  -5  -5   0   48.50   15.00
   5  -5   0   26.40   11.00
  -5  -5   0    7.00   13.40
   5   5   0   37.90   14.10
   6  -5   0  104.19   13.90
  -6  -5   0  110.69   17.80
  -6  -5   0  114.69   17.20
  -6  -5   0  112.79   20.40
  -6   5   0   94.39   14.30
   6   5   0  122.59   18.10
   6   5   0  108.59   17.30
  -7  -5   0   83.39   17.60
  -7  -5   0   92.39   16.70
   7   5   0  122.19   19.00
  -7   5   0   93.89   12.60
   7   5   0   71.19   16.40
   8  -5   0   35.10   11.90
  -8  -5   0   52.19   18.10
  -8  -5   0   52.19   16.00
  -8  -5   0   37.00   18.10
   8   5   0   41.90   17.10
   8   5   0   58.69   17.20
  -8   5   0   39.00   12.50
   9  -5   0  -16.80   13.50
  -9  -5   0   -6.70   14.80
  -9  -5   0   -8.40   16.20
  -9  -5   0  -28.20   34.70
   9   5   0  -28.50   15.80
   9   5   0    4.70   16.50
  -9   5   0    2.30   11.50
 -10  -5   0   31.70   19.00
  10  -5   0   42.40   13.80
 -10  -5   0   29.10   19.70
 -10   5   0   34.00   11.80
  10   5   0   64.09   20.20
  10   5   0   46.70   17.70
   0  -6   0   41.80   14.10
   0  -6   0   36.80   14.80
   0   6   0   48.00   14.10
   0   6   0   18.90   11.20
  -1  -6   0    2.50   12.90
   1  -6   0   14.20   12.30
  -1  -6   0   22.30   14.00
   1  -6   0    4.60   13.60
   1   6   0    5.10   12.90
   1   6   0   10.30   13.00
  -1   6   0   16.20   12.30
  -1   6   0   -7.80   12.30
  -2  -6   0   13.10   13.90
   2  -6   0    6.80   12.30
  -2  -6   0   22.60   15.00
   2  -6   0   12.30   13.70
  -2  -6   0    2.80   10.10
  -2   6   0   -0.30   13.00
  -2   6   0   -2.60   11.80
   2   6   0   -1.20   13.00
   2   6   0    1.80   11.50
  -3  -6   0   64.49   17.00
   3  -6   0   51.79   13.80
  -3  -6   0   60.79   13.10
   3  -6   0   58.89   14.40
  -3  -6   0   39.40   15.50
  -3   6   0   52.49   13.50
  -3   6   0   45.70   14.10
   3   6   0   47.40   13.40
   3   6   0   59.49   15.90
  -4  -6   0   43.30   14.00
  -4  -6   0   15.30   15.80
  -4  -6   0   24.90   15.40
   4  -6   0   37.10   12.90
   4  -6   0   59.59   14.70
   4   6   0   36.50   15.70
   4   6   0   30.40   13.10
  -4   6   0   27.20   14.00
  -5  -6   0  129.09   26.20
   5  -6   0   80.59   14.80
  -5  -6   0  100.09   19.40
   5  -6   0   94.49   16.30
  -5  -6   0  116.49   21.40
   5   6   0   96.49   16.20
   5   6   0  110.39   18.30
  -5   6   0   90.29   13.70
  -6  -6   0   -7.70   14.70
  -6  -6   0   15.80   17.60
   6   6   0   -8.50   14.70
  -6   6   0   11.20   13.40
  -6   6   0    9.40   11.60
   7  -6   0    5.40   12.30
  -7  -6   0   -0.60   15.40
  -7  -6   0  -29.00   16.10
   7  -6   0   27.90   13.70
   7   6   0    7.00   21.30
  -7   6   0    4.80   13.10
  -7   6   0   -0.50   11.40
  16   0  -1   18.00   17.70
  16   0  -1   14.40   20.50
 -16   0   1  -26.40   16.30
 -16   0   1  -18.20   17.90
 -15   0   1   84.09   23.00
 -15   0   1  110.89   19.20
  15   0  -1  112.99   22.60
  15   0  -1  159.08   22.40
  15   0  -1   89.09   19.40
 -15   0   1  117.69   18.80
  14   0  -1  189.48   21.80
 -14   0   1  175.58   25.20
  14   0  -1  154.18   22.50
 -14   0   1  170.88   20.70
 -14   0   1  174.98   20.10
  13   0  -1   85.89   17.80
 -13   0   1   71.19   16.80
  13   0  -1   81.29   17.10
  13   0  -1   60.39   16.00
 -13   0   1   84.89   16.30
 -13   0   1   70.49   14.40
 -12   0   1   85.49   21.70
  12   0  -1   40.50   13.90
 -12   0   1   59.79   14.60
  12   0  -1   56.69   15.20
 -12   0   1   60.79   13.10
  12   0  -1   49.10   17.10
 -11   0   1   -9.20   12.50
 -11   0   1    1.60   12.00
  11   0  -1   12.80   14.10
  11   0  -1   -1.00   12.00
  11   0  -1  -26.10   12.30
 -11   0   1   -4.40   10.90
 -10   0   1  703.03   40.20
 -10   0   1  709.63   39.30
 -10   0   1  702.93   38.30
  10   0  -1  646.14   39.10
  10   0  -1  775.12   39.50
  10   0  -1  672.33   40.50
  -9   0   1  887.11   47.30
   9   0  -1  961.30   46.70
   9   0  -1  860.81   47.70
  -9   0   1  880.31   46.40
   9   0  -1  834.92   46.50
  -9   0   1  876.81   45.80
  -8   0   1  611.64   33.50
   8   0  -1  582.74   35.40
   8   0  -1  644.94   33.50
  -8   0   1  630.94   32.80
  -8   0   1  602.24   34.80
   8   0  -1  577.54   33.70
  -7   0   1  271.57   19.60
  -7   0   1  238.88   18.60
   7   0  -1  217.88   18.60
   7   0  -1  231.08   20.00
  -7   0   1  258.07   17.20
   7   0  -1  231.08   18.00
   6   0  -1 1742.13   90.29
  -6   0   1 1956.80   90.09
   6   0  -1 1803.02   91.39
  -6   0   1 1868.21   91.09
   6   0  -1 1908.01   90.29
  -6   0   1 1848.22   90.19
   5   0  -1 5907.11  279.97
   5   0  -1 5554.44  279.97
  -5   0   1 5984.90  280.67
  -5   0   1 6077.69  279.97
  -5   0   1 5828.22  279.97
   4   0  -1 8177.28  381.66
   4   0  -1 8613.34  381.86
  -4   0   1 7937.01  381.56
   4   0  -1 7344.47  382.06
  -3   0   1 4442.96  210.88
   3   0  -1 4266.97  210.88
   3   0  -1 4633.94  210.38
   3   0  -1 4436.56  210.38
  -3   0   1 4293.97  210.38
   2   0  -1  599.94   28.10
  -2   0   1  572.14   28.30
  -2   0   1  567.74   28.70
   2   0  -1  560.74   28.10
   2   0  -1  573.64   28.90
   1   0   1   89.79    7.30
  -1   0  -1   95.99    7.00
  -1   0  -1  110.79    7.70
   1   0   1  120.49    7.40
  -2   0  -1 3539.65  174.28
   2   0   1 3601.94  174.08
   2   0   1 3785.82  174.08
  -2   0  -1 3820.62  174.08
  -2   0  -1 3499.95  174.08
  -3   0  -1   17.10    8.70
   3   0   1   12.00    9.20
   4   0   1  742.93   38.00
   4   0   1  783.32   38.40
  -4   0  -1  793.32   37.80
   4   0   1  691.03   39.00
  -4   0  -1  688.13   41.80
   5   0   1  246.38   18.30
  -5   0  -1  240.38   19.00
  -5   0  -1  261.47   18.40
   5   0   1  218.88   19.20
  -5   0  -1  260.57   17.30
   5   0   1  241.48   17.80
  -6   0  -1  130.69   15.90
  -6   0  -1  124.19   14.10
   6   0   1  117.69   15.20
   6   0   1  121.89   16.50
  -6   0  -1  127.69   15.70
   6   0   1  116.19   14.70
   7   0   1  132.59   18.10
   7   0   1  134.59   15.40
  -7   0  -1  131.59   15.00
  -7   0  -1  143.29   16.30
  -7   0  -1  140.29   16.10
   7   0   1  138.29   16.10
   8   0   1  159.68   19.10
  -8   0  -1  164.68   18.20
  -8   0  -1  187.38   16.40
   8   0   1  188.78   17.40
   8   0   1  137.79   17.50
  -8   0  -1  198.18   17.90
  -9   0  -1   95.59   12.20
   9   0   1   69.09   12.70
   9   0   1  104.49   13.30
  -9   0  -1   75.79   12.90
   9   0   1   82.99   14.20
  -9   0  -1  140.79   17.20
 -10   0  -1   72.79   13.90
 -10   0  -1   58.49   13.30
  10   0   1   59.99   13.40
  10   0   1   52.79   13.30
  10   0   1   92.09   17.40
 -10   0  -1   67.59   13.90
 -11   0  -1   89.09   15.00
 -11   0  -1  112.29   18.60
 -11   0  -1  110.79   17.30
  11   0   1   86.89   15.80
  11   0   1  126.39   19.70
 -12   0  -1   45.60   14.90
 -12   0  -1   60.89   13.90
  12   0   1   68.09   15.80
  12   0   1   65.79   16.00
 -12   0  -1   58.09   16.60
  13   0   1   14.80   15.40
  13   0   1   14.60   15.60
 -13   0  -1    1.10   15.10
 -13   0  -1   32.60   14.20
 -13   0  -1   15.00   16.20
  14   0   1    1.50   16.50
 -14   0  -1  -23.40   15.20
 -14   0  -1  -13.10   15.30
 -14   0  -1   -8.60   17.40
  14   0   1    1.50   15.60
 -15   0  -1   97.29   18.50
  15   0   1  115.39   20.90
 -16  -1   1   68.79   19.70
 -16  -1   1   94.19   18.70
  16  -1  -1  138.69   21.90
 -16  -1   1  102.49   27.10
  16  -1  -1  153.88   22.10
  16   1  -1  151.98   27.10
 -16   1   1   94.49   18.60
  16   1  -1   97.29   22.50
 -16   1   1   85.89   15.90
  16   1  -1  123.79   21.80
 -16   1   1  131.99   22.10
 -15  -1   1   13.00   17.20
  15  -1  -1   15.90   17.20
 -15  -1   1   -3.30   17.30
 -15  -1   1   -7.80   15.90
  15  -1  -1    9.80   15.60
 -15   1   1   -9.00   15.20
 -15   1   1    0.60   13.10
 -15   1   1   10.00   17.00
  15   1  -1    1.60   18.30
  15   1  -1   12.90   19.50
  15   1  -1  -22.00   18.20
  14  -1  -1  246.68   28.60
  14  -1  -1  247.18   26.00
 -14  -1   1  196.48   22.60
 -14  -1   1  227.28   23.70
  14  -1  -1  167.58   23.20
  14   1  -1  228.18   28.50
  14   1  -1  192.08   25.80
  14   1  -1  256.37   27.60
 -14   1   1  248.88   24.50
 -14   1   1  186.98   26.20
 -14   1   1  226.58   24.20
 -13  -1   1  296.77   27.90
 -13  -1   1  246.68   29.50
  13  -1  -1  310.57   27.20
  13  -1  -1  322.87   27.10
 -13  -1   1  329.77   25.50
  13   1  -1  333.67   30.30
 -13   1   1  305.07   23.80
 -13   1   1  277.17   26.40
 -13   1   1  303.57   39.20
  13   1  -1  336.87   28.60
  13   1  -1  354.56   28.80
  12  -1  -1   93.99   15.80
 -12  -1   1   89.19   17.80
 -12  -1   1  104.09   16.80
  12  -1  -1  121.29   15.90
 -12  -1   1  105.09   15.50
  12  -1  -1  130.59   18.70
  12   1  -1  134.49   17.70
 -12   1   1   89.69   16.20
  12   1  -1   91.49   19.70
  12   1  -1   74.69   16.00
 -12   1   1   95.19   15.50
 -12   1   1   97.19   13.80
  11  -1  -1    7.60   12.00
 -11  -1   1   25.10   11.40
 -11  -1   1   13.20   18.70
 -11  -1   1   29.10   16.20
  11  -1  -1   15.20   14.80
 -11   1   1    0.00   12.70
  11   1  -1   26.00   13.80
 -11   1   1   22.30   13.40
  11   1  -1   -6.20   14.90
 -11   1   1   21.40   11.00
  10  -1  -1  225.88   19.30
  10  -1  -1  198.88   21.20
 -10  -1   1  179.38   20.30
  10  -1  -1  193.18   19.30
 -10  -1   1  240.08   27.10
 -10  -1   1  215.38   22.70
  10   1  -1  226.68   21.80
  10   1  -1  192.78   23.50
  10   1  -1  209.98   20.70
 -10   1   1  202.48   17.60
 -10   1   1  217.08   19.30
 -10   1   1  197.98   20.00
  -9  -1   1  286.07   22.70
  -9  -1   1  326.67   24.10
   9  -1  -1  292.17   21.40
  -9  -1   1  315.47   21.40
   9  -1  -1  324.67   21.30
   9  -1  -1  304.37   23.00
   9   1  -1  279.17   22.70
  -9   1   1  314.07   21.50
   9   1  -1  307.57   25.60
  -9   1   1  278.57   22.10
   9   1  -1  333.67   22.60
   8  -1  -1  823.02   44.00
  -8  -1   1  834.82   43.90
  -8  -1   1  842.22   45.30
  -8  -1   1  858.71   43.30
   8  -1  -1  850.51   42.80
   8  -1  -1  802.72   43.10
  -8   1   1  836.82   42.90
   8   1  -1  788.02   45.30
  -8   1   1  847.02   43.80
   8   1  -1  865.11   43.80
   8   1  -1  761.02   43.70
   7  -1  -1 2175.68  105.39
  -7  -1   1 2221.58  106.39
   7  -1  -1 2231.08  104.49
  -7  -1   1 2259.17  105.09
   7  -1  -1 2144.99  104.79
  -7  -1   1 2213.68  105.29
   7   1  -1 1959.40  106.19
   7   1  -1 2176.98  105.29
  -7   1   1 2159.68  104.49
  -7   1   1 2196.48  105.19
   7   1  -1 1990.70  105.19
  -6  -1   1  666.03   34.80
  -6  -1   1  651.93   35.70
   6  -1  -1  649.14   33.10
   6  -1  -1  623.74   33.50
  -6  -1   1  665.53   34.00
  -6   1   1  619.14   33.90
  -6   1   1  648.44   33.30
   6   1  -1  600.14   36.60
   6   1  -1  658.13   34.40
   6   1  -1  600.24   34.70
  -5  -1   1  248.38   17.80
   5  -1  -1  247.68   14.50
  -5  -1   1  207.58   18.10
   5  -1  -1  233.18   15.40
  -5  -1   1  258.97   16.20
   5  -1  -1  192.68   15.80
  -5   1   1  236.98   14.90
  -5   1   1  185.78   15.10
   5   1  -1  241.98   16.80
  -5   1   1  194.98   13.70
   5   1  -1  207.28   17.40
   5   1  -1  188.68   18.80
  -4  -1   1  940.51   46.50
   4  -1  -1  959.70   44.40
  -4  -1   1  976.10   45.40
  -4  -1   1  770.02   49.20
   4  -1  -1  871.61   45.00
   4  -1  -1  926.11   45.10
   4   1  -1  851.41   47.90
  -4   1   1  887.21   45.00
  -4   1   1  881.01   45.00
   4   1  -1  944.81   46.10
   4   1  -1  901.01   45.50
  -4   1   1  939.61   44.50
   3  -1  -1 4959.50  238.98
   3  -1  -1 4919.11  238.78
  -3  -1   1 5360.96  239.48
   3  -1  -1 5055.99  238.78
  -3  -1   1 5453.25  239.98
  -3  -1   1 4942.81  239.48
   3   1  -1 4813.62  239.88
   3   1  -1 5151.58  239.48
  -3   1   1 4935.41  238.78
  -3   1   1 4966.10  238.98
  -3   1   1 4698.83  238.78
   3   1  -1 4957.20  239.48
   2  -1  -1  624.44   29.90
   2  -1  -1  576.14   30.00
  -2  -1   1  634.04   31.20
  -2  -1   1  583.04   31.80
  -2  -1   1  668.13   31.80
   2  -1  -1  597.74   30.00
  -2   1   1  587.74   30.00
   2   1  -1  652.03   31.40
  -2   1   1  586.44   30.20
   2   1  -1  647.24   31.80
   2   1  -1  607.64   31.70
  -1  -1   1 1006.20   50.09
  -1  -1   1 1055.39   49.80
   1   1  -1 1105.89   49.99
  -1   1   1  873.81   49.10
   1   1  -1 1034.50   49.80
  -1   1   1 1057.49   49.30
   0  -1   1 5353.96  254.67
   0  -1   1 5368.96  254.67
   0   1  -1 5264.27  254.67
   0   1  -1 5407.96  254.67
   1  -1   1 4645.94  233.58
  -1  -1  -1 5334.77  233.78
   1  -1   1 4727.03  233.68
   1   1   1 5418.96  233.78
   1   1   1 4915.21  233.78
  -1   1  -1 4707.53  233.68
  -1   1  -1 4589.94  233.58
  -2  -1  -1  771.52   38.60
  -2  -1  -1  786.62   38.40
  -2  -1  -1  825.52   38.00
   2  -1   1  723.63   37.50
   2  -1   1  703.03   37.50
   2   1   1  681.03   38.60
  -2   1  -1  708.03   37.40
   2   1   1  775.52   38.20
   2   1   1  859.61   38.10
  -2   1  -1  726.93   37.70
   3  -1   1  458.25   26.80
  -3  -1  -1  504.35   27.40
   3  -1   1  489.75   25.80
  -3  -1  -1  526.95   26.50
   3   1   1  476.45   27.90
  -3   1  -1  509.65   26.90
  -3   1  -1  480.25   25.80
   3   1   1  498.25   27.00
   3   1   1  527.05   26.70
  -3   1  -1  466.05   25.60
  -4  -1  -1 2985.00  139.59
  -4  -1  -1 2912.01  140.39
   4  -1   1 2965.80  139.29
   4  -1   1 2874.51  139.29
  -4   1  -1 2968.10  139.39
   4   1   1 2913.91  139.89
   4   1   1 2741.33  140.39
  -4   1  -1 2779.12  139.29
   4   1   1 3041.40  139.69
  -4   1  -1 2842.52  139.19
  -5  -1  -1 1703.43   82.09
  -5  -1  -1 1645.44   81.19
   5  -1   1 1664.13   80.49
  -5  -1  -1 1740.53   81.09
   5  -1   1 1653.53   80.69
   5   1   1 1715.53   81.19
  -5   1  -1 1724.93   80.59
  -5   1  -1 1615.94   80.59
   5   1   1 1547.85   81.19
   5   1   1 1519.65   82.19
   6  -1   1  115.59   14.20
   6  -1   1  127.09   13.80
  -6  -1  -1  124.29   17.10
  -6  -1  -1  104.89   16.10
  -6  -1  -1  133.99   15.70
  -6   1  -1  109.99   11.40
   6   1   1  133.79   15.60
  -6   1  -1  123.99   14.30
   6   1   1  107.29   12.30
   6   1   1  113.49   12.60
  -6   1  -1  134.59   13.70
   7  -1   1  208.58   16.80
   7  -1   1  180.58   17.50
  -7  -1  -1  213.78   17.20
  -7  -1  -1  215.38   20.00
  -7  -1  -1  213.88   18.70
  -7   1  -1  215.28   17.00
   7   1   1  211.98   20.80
   7   1   1  198.48   18.80
  -7   1  -1  198.28   16.60
  -7   1  -1  229.98   17.40
   7   1   1  188.98   18.20
  -8  -1  -1  368.96   26.10
  -8  -1  -1  384.76   24.10
   8  -1   1  346.17   24.30
   8  -1   1  389.56   23.90
  -8  -1  -1  396.76   25.50
   8   1   1  331.57   25.00
  -8   1  -1  387.16   23.50
  -8   1  -1  383.76   24.50
   8   1   1  405.06   25.00
   8   1   1  343.37   27.00
  -8   1  -1  404.76   24.40
  -9  -1  -1  107.49   15.80
   9  -1   1  129.29   13.70
  -9  -1  -1  108.49   13.70
   9  -1   1  109.09   14.00
  -9  -1  -1  134.09   15.60
  -9   1  -1  102.49   13.40
  -9   1  -1  110.69   14.00
   9   1   1  105.59   15.30
   9   1   1  112.59   14.10
   9   1   1  105.19   14.30
  -9   1  -1  111.99   12.90
 -10  -1  -1   33.10   13.50
 -10  -1  -1   36.70   11.50
  10  -1   1   18.20   12.00
  10  -1   1   21.20   12.40
 -10  -1  -1   34.40   14.40
  10   1   1   35.80   13.40
 -10   1  -1   17.90   12.30
 -10   1  -1   23.00   12.10
  10   1   1   31.20   16.30
 -10   1  -1   33.20   11.00
  10   1   1   33.40   13.10
  11  -1   1   44.30   13.80
 -11  -1  -1   58.49   15.70
  11  -1   1   19.20   13.30
 -11  -1  -1   52.99   13.10
 -11  -1  -1   43.20   16.10
 -11   1  -1   42.70   12.50
 -11   1  -1   54.79   15.20
  11   1   1   41.90   14.80
  11   1   1   40.00   17.70
  11   1   1   40.60   15.20
 -11   1  -1   52.79   13.70
  12  -1   1   60.49   15.60
 -12  -1  -1   40.60   16.20
 -12  -1  -1   45.90   14.50
 -12  -1  -1   58.39   17.70
  12  -1   1   32.60   14.90
  12   1   1   69.79   16.20
 -12   1  -1   26.90   14.60
  12   1   1   46.10   17.80
 -12   1  -1   35.00   13.50
 -12   1  -1   50.39   16.10
  12   1   1   33.80   15.50
 -13  -1  -1   63.19   18.80
 -13  -1  -1   86.79   18.80
 -13  -1  -1   87.79   15.80
  13  -1   1  100.59   17.70
 -13   1  -1   67.89   14.50
  13   1   1   71.19   18.50
 -13   1  -1   65.99   15.80
  13   1   1   60.89   17.50
 -13   1  -1   51.09   17.00
  14  -1   1   37.20   16.90
  14  -1   1   28.10   17.40
 -14  -1  -1   20.10   18.40
 -14  -1  -1   14.30   17.50
 -14  -1  -1   41.50   16.00
 -14   1  -1   16.30   13.90
  14   1   1   17.90   18.00
 -14   1  -1   19.10   15.60
  14   1   1   46.30   18.00
 -14   1  -1   22.90   17.70
  15  -1   1   25.40   20.90
  15  -1   1  -12.50   26.70
 -15  -1  -1   11.00   15.70
 -15  -1  -1   13.10   22.30
  15   1   1  -22.80   18.60
 -15   1  -1   -5.00   25.00
 -15  -2   1    2.80   16.40
  15  -2  -1   26.60   16.90
 -15  -2   1    1.30   24.10
  15   2  -1   -2.80   19.10
  15   2  -1  125.09   28.30
 -15   2   1   17.00   24.40
 -15   2   1   31.20   17.40
 -14  -2   1   20.10   18.00
  14  -2  -1   37.30   16.10
 -14  -2   1   29.90   18.30
  14  -2  -1   52.39   16.10
 -14  -2   1   45.70   18.30
  14   2  -1   15.90   18.10
 -14   2   1   41.30   19.50
  14   2  -1   52.79   20.90
  14   2  -1   27.80   18.30
 -14   2   1   40.20   15.20
 -13  -2   1   27.40   17.30
 -13  -2   1   25.60   14.90
  13  -2  -1   48.30   15.40
  13  -2  -1   29.20   18.70
 -13   2   1   44.60   14.90
  13   2  -1   21.40   18.00
  13   2  -1   31.40   19.60
 -13   2   1   28.80   14.20
  13   2  -1   28.50   17.10
 -12  -2   1   91.29   16.40
  12  -2  -1  111.19   15.90
  12  -2  -1  112.99   15.70
 -12  -2   1   74.19   18.20
 -12  -2   1  112.99   17.80
 -12   2   1   80.59   15.80
  12   2  -1  108.79   17.50
  12   2  -1  136.89   21.60
 -12   2   1  112.19   15.20
  12   2  -1  120.89   18.80
 -11  -2   1  234.68   24.40
  11  -2  -1  250.57   21.90
 -11  -2   1  266.47   23.00
  11  -2  -1  283.77   21.90
 -11  -2   1  245.98   26.30
  11   2  -1  305.07   25.10
  11   2  -1  237.98   24.70
  11   2  -1  216.08   26.40
 -11   2   1  207.98   17.80
 -11   2   1  258.47   21.40
 -11   2   1  250.57   21.10
  10  -2  -1  727.63   38.50
 -10  -2   1  737.13   46.30
  10  -2  -1  621.04   37.60
 -10  -2   1  656.23   40.00
  10  -2  -1  756.62   37.50
 -10  -2   1  650.53   38.70
 -10   2   1  564.54   35.60
  10   2  -1  697.23   39.40
 -10   2   1  702.03   37.50
  10   2  -1  626.24   39.50
  10   2  -1  720.63   43.10
 -10   2   1  662.23   37.80
  -9  -2   1  113.49   15.90
   9  -2  -1  134.99   15.70
  -9  -2   1  128.89   16.20
   9  -2  -1  186.18   16.90
  -9  -2   1  166.38   17.10
   9  -2  -1  155.48   15.30
  -9   2   1  149.29   16.00
  -9   2   1  134.19   14.00
   9   2  -1  160.98   19.20
   9   2  -1  108.29   14.90
   9   2  -1  123.29   15.00
  -9   2   1  137.79   15.70
  -8  -2   1  170.88   19.40
   8  -2  -1  176.48   15.50
  -8  -2   1  162.98   16.70
   8  -2  -1  159.28   14.70
   8  -2  -1  133.69   15.20
  -8  -2   1  149.09   19.00
  -8   2   1  111.79   15.10
   8   2  -1  190.08   17.90
  -8   2   1  220.88   15.40
   8   2  -1  139.79   18.10
   8   2  -1  176.38   20.30
  -8   2   1  175.68   14.40
   7  -2  -1  476.05   26.60
  -7  -2   1  458.05   28.10
   7  -2  -1  484.85   28.00
   7  -2  -1  497.95   26.40
  -7  -2   1  486.95   30.10
  -7  -2   1  505.55   29.40
   7   2  -1  450.55   29.00
   7   2  -1  483.75   28.70
  -7   2   1  444.76   29.90
   7   2  -1  471.15   30.50
  -7   2   1  498.25   26.90
  -7   2   1  527.15   26.50
   6  -2  -1  608.44   30.60
  -6  -2   1  620.44   32.50
   6  -2  -1  597.64   30.80
   6  -2  -1  567.44   30.80
  -6  -2   1  630.44   34.20
  -6  -2   1  611.94   33.30
   6   2  -1  536.65   34.20
  -6   2   1  606.44   31.00
  -6   2   1  601.04   30.60
  -6   2   1  509.35   30.70
   6   2  -1  570.24   33.30
   6   2  -1  626.74   32.80
  -5  -2   1  634.94   33.50
  -5  -2   1  611.84   33.90
   5  -2  -1  570.34   30.80
   5  -2  -1  631.14   30.70
  -5  -2   1  632.54   32.50
   5  -2  -1  577.14   30.40
  -5   2   1  592.14   30.70
  -5   2   1  594.54   31.00
   5   2  -1  631.84   32.80
   5   2  -1  563.94   34.10
   5   2  -1  549.05   33.10
  -4  -2   1  574.24   30.60
   4  -2  -1  542.85   28.70
  -4  -2   1  613.44   31.80
  -4  -2   1  561.54   31.60
   4  -2  -1  562.64   28.70
  -4   2   1  538.35   28.70
   4   2  -1  561.44   32.10
   4   2  -1  525.35   31.40
   4   2  -1  579.94   30.90
  -4   2   1  545.45   29.10
   3  -2  -1  373.56   20.90
  -3  -2   1  387.26   22.80
   3  -2  -1  363.66   20.80
  -3  -2   1  412.16   23.50
  -3  -2   1  378.86   30.20
  -3   2   1  367.26   21.60
  -3   2   1  347.27   20.70
   3   2  -1  406.46   23.80
   3   2  -1  430.36   24.30
   3   2  -1  429.96   23.30
   2  -2  -1  308.97   18.30
  -2  -2   1  334.47   20.20
  -2  -2   1  329.97   21.40
  -2  -2   1  337.57   20.00
   2   2  -1  338.07   20.90
   2   2  -1  326.67   21.70
   2   2  -1  332.37   20.60
  -1  -2   1  787.32   40.00
  -1  -2   1  805.82   41.00
   1  -2  -1  756.22   40.00
   1  -2  -1  812.22   39.10
   1  -2  -1  773.22   40.20
   1   2  -1  836.42   40.40
  -1   2   1  789.32   39.90
   1   2  -1  860.81   40.90
   0  -2  -1  150.58   12.20
   0  -2   1  170.68   10.90
   0  -2   1  176.18   13.80
   0  -2  -1  149.29   14.10
   0  -2  -1  190.28   12.90
   0   2  -1  171.68   11.50
   0   2  -1  173.38   13.20
   0   2   1  182.28   12.90
   1  -2   1  835.22   42.90
  -1  -2  -1  869.71   43.20
  -1  -2  -1  854.31   43.50
   1  -2   1  836.92   42.90
  -1  -2  -1  831.92   42.90
   1   2   1  862.01   43.30
  -1   2  -1  895.31   41.50
  -1   2  -1  839.42   43.40
   1   2   1  896.41   43.00
  -1   2  -1  840.32   42.80
  -2  -2  -1  444.56   26.20
  -2  -2  -1  501.35   30.70
   2  -2   1  436.36   24.50
  -2  -2  -1  456.75   25.00
   2  -2   1  444.26   24.40
   2   2   1  482.95   25.40
  -2   2  -1  424.96   24.90
  -2   2  -1  420.76   24.20
   2   2   1  465.75   26.10
   2   2   1  472.85   25.80
   3  -2   1   53.19    7.90
  -3  -2  -1   69.19   11.60
  -3  -2  -1   58.59   10.60
   3  -2   1   63.19    7.80
  -3  -2  -1   56.59    9.20
   3   2   1   75.59   16.00
   3   2   1   60.69    9.40
   3   2   1   49.40   10.30
  -3   2  -1   49.30    6.50
  -3   2  -1   61.19    8.80
  -3   2  -1   59.69    7.60
  -4  -2  -1  955.40   47.10
  -4  -2  -1  876.31   45.50
  -4  -2  -1  944.81   46.30
   4  -2   1  922.61   44.70
   4  -2   1  891.21   44.80
  -4   2  -1  874.41   45.00
   4   2   1  924.31   45.80
   4   2   1  822.92   46.60
  -4   2  -1  857.91   44.50
  -4   2  -1  843.32   43.70
   4   2   1  889.91   46.00
  -5  -2  -1 4275.37  188.98
  -5  -2  -1 4095.29  187.98
   5  -2   1 3678.43  186.98
   5  -2   1 3986.10  187.08
  -5  -2  -1 3875.71  187.58
   5   2   1 3617.44  188.38
   5   2   1 3890.81  187.78
  -5   2  -1 3920.61  186.58
   5   2   1 4057.59  187.78
  -5   2  -1 3751.82  186.98
  -5   2  -1 3780.82  186.88
  -6  -2  -1  249.88   21.30
  -6  -2  -1  260.37   18.50
   6  -2   1  211.98   17.10
  -6  -2  -1  238.78   20.30
   6  -2   1  261.07   17.00
   6   2   1  273.87   19.20
   6   2   1  225.38   20.90
   6   2   1  241.38   19.50
  -6   2  -1  224.78   16.30
  -6   2  -1  238.58   17.80
  -6   2  -1  244.18   18.40
  -7  -2  -1  165.28   19.00
   7  -2   1  137.19   15.00
   7  -2   1  141.59   15.00
  -7  -2  -1  169.98   16.70
  -7  -2  -1  188.88   18.90
  -7   2  -1  182.88   16.00
   7   2   1  186.48   20.70
   7   2   1  159.18   18.20
   7   2   1  215.58   18.10
  -7   2  -1  164.48   14.60
  -7   2  -1  161.68   14.80
   8  -2   1  170.28   16.10
  -8  -2  -1  152.28   17.10
   8  -2   1  140.99   16.00
  -8  -2  -1  159.28   19.90
  -8  -2  -1  140.99   16.00
  -8   2  -1  146.49   15.40
  -8   2  -1  152.38   15.20
   8   2   1  145.69   18.80
   8   2   1  170.58   18.40
  -8   2  -1  154.18   16.70
   8   2   1  151.68   21.10
   9  -2   1  270.77   20.10
  -9  -2  -1  206.78   20.40
  -9  -2  -1  226.08   22.90
   9  -2   1  232.58   20.30
  -9  -2  -1  239.28   23.50
  -9   2  -1  228.28   20.40
  -9   2  -1  255.57   18.80
   9   2   1  211.28   22.40
   9   2   1  254.57   25.70
   9   2   1  248.18   22.00
  -9   2  -1  214.98   19.60
 -10  -2  -1   35.20   13.00
 -10  -2  -1   33.60   16.40
  10  -2   1   38.10   12.60
  10  -2   1   40.60   12.30
 -10  -2  -1   10.50   14.30
  10   2   1   33.80   14.30
 -10   2  -1   20.60   10.90
  10   2   1   37.40   13.60
 -10   2  -1   28.10   13.10
  10   2   1   48.30   17.20
 -10   2  -1   36.50   12.60
  11  -2   1  198.98   21.60
 -11  -2  -1  211.78   25.20
 -11  -2  -1  224.68   22.10
 -11  -2  -1  234.98   25.60
  11  -2   1  236.78   22.70
 -11   2  -1  223.58   21.10
  11   2   1  220.68   27.60
 -11   2  -1  199.28   22.50
 -11   2  -1  236.88   20.40
  11   2   1  233.78   25.00
  11   2   1  211.48   24.40
 -12  -2  -1  183.28   23.20
 -12  -2  -1  178.28   26.00
 -12  -2  -1  182.78   22.30
  12  -2   1  216.28   23.40
  12  -2   1  188.88   21.80
 -12   2  -1  258.17   22.30
 -12   2  -1  188.08   23.20
 -12   2  -1  177.68   19.40
  12   2   1  167.98   22.60
  12   2   1  202.48   25.90
  12   2   1  207.78   25.10
 -13  -2  -1  121.99   21.90
 -13  -2  -1  111.39   20.40
 -13  -2  -1  136.99   19.80
  13  -2   1  187.08   20.10
  13  -2   1  100.79   18.20
 -13   2  -1  139.49   17.90
 -13   2  -1  137.79   20.20
 -13   2  -1  124.79   17.90
  13   2   1  130.39   21.30
 -14  -2  -1    7.10   16.10
 -14  -2  -1    0.60   17.30
  14  -2   1   13.40   17.40
  14  -2   1   19.10   17.10
 -14  -2  -1    3.50   18.10
 -14   2  -1    2.20   16.40
  14   2   1    1.90   18.90
 -14   2  -1   14.10   14.90
  14   2   1   24.80   17.60
 -14   2  -1   -6.80   16.00
 -15  -2  -1   11.70   20.00
  15  -2   1   11.40   16.70
 -15  -2  -1   15.50   18.00
  15  -2   1   30.60   18.40
 -15  -2  -1    5.40   19.00
  15   2   1   33.20   20.20
 -15   2  -1   14.90   16.60
  15   2   1   26.60   19.30
 -15   2  -1   36.10   19.60
 -15   2  -1   -0.50   13.10
 -14  -3   1   62.59   17.10
  14  -3  -1   60.49   20.00
  14  -3  -1   50.09   15.60
 -14  -3   1   51.09   23.70
 -14   3   1   75.29   16.30
 -14   3   1   42.50   15.90
  14   3  -1   40.00   19.20
 -14   3   1   55.39   14.50
  14   3  -1   81.59   23.30
  14   3  -1   84.49   28.50
  13  -3  -1   58.59   14.00
 -13  -3   1   41.00   18.50
 -13  -3   1   35.40   20.40
  13  -3  -1   20.80   14.10
 -13  -3   1   34.80   15.80
  13   3  -1   73.79   20.70
  13   3  -1   34.60   18.10
 -13   3   1   33.90   12.50
 -13   3   1   43.40   14.30
 -13   3   1   41.70   14.50
  13   3  -1   53.19   20.90
  12  -3  -1   82.09   16.00
 -12  -3   1   71.39   18.40
 -12  -3   1   62.39   16.00
  12  -3  -1  103.99   14.30
 -12   3   1   71.79   14.40
  12   3  -1   68.79   17.70
 -12   3   1   67.69   13.40
  12   3  -1   91.09   18.70
 -12   3   1   80.99   14.70
  12   3  -1   89.89   21.20
  11  -3  -1   53.69   12.20
 -11  -3   1   79.59   18.70
 -11  -3   1   54.39   14.40
  11  -3  -1   54.49   12.90
 -11  -3   1   51.39   17.40
  11   3  -1   66.39   16.70
 -11   3   1   58.59   12.10
 -11   3   1   55.69   12.50
  11   3  -1   73.99   16.20
 -11   3   1   75.59   13.40
  11   3  -1   96.99   19.50
 -10  -3   1  241.68   23.50
  10  -3  -1  266.67   20.90
  10  -3  -1  313.97   20.40
 -10  -3   1  313.57   27.30
 -10  -3   1  252.87   27.70
 -10   3   1  256.97   21.30
  10   3  -1  285.47   25.30
 -10   3   1  230.18   19.70
  10   3  -1  243.08   27.80
  10   3  -1  280.37   27.50
 -10   3   1  216.38   19.40
  -9  -3   1   67.09   30.80
  -9  -3   1   94.59   16.70
   9  -3  -1   77.89   11.10
  -9  -3   1   83.79   14.10
  -9   3   1  113.09   14.10
   9   3  -1  116.99   25.00
  -9   3   1  100.59   12.70
   9   3  -1   85.09   15.20
  -9   3   1   80.09   11.70
   9   3  -1   93.89   15.50
  -8  -3   1  311.27   25.20
  -8  -3   1  277.77   22.20
   8  -3  -1  259.57   19.50
  -8  -3   1  284.57   24.20
   8  -3  -1  305.77   19.00
  -8   3   1  283.97   19.00
  -8   3   1  281.77   20.20
   8   3  -1  281.87   25.50
  -8   3   1  230.78   17.30
   8   3  -1  303.87   23.30
   8   3  -1  276.87   24.10
  -7  -3   1    5.40   10.10
   7  -3  -1    5.40    7.50
   7  -3  -1   21.70    8.50
  -7  -3   1   12.00   12.90
  -7  -3   1   13.40   11.80
   7   3  -1   28.80   14.10
  -7   3   1   15.40    9.10
   7   3  -1   -5.20   10.80
   7   3  -1   27.70   11.50
  -7   3   1   18.30    7.70
   6  -3  -1   88.89    9.20
  -6  -3   1   97.89   14.50
  -6  -3   1   81.99   11.70
  -6  -3   1   91.29   13.70
   6  -3  -1   78.99    9.40
  -6   3   1   87.19   10.50
   6   3  -1   87.59   12.80
   6   3  -1   97.99   13.80
  -6   3   1   91.59   10.90
   6   3  -1   51.39   12.30
  -5  -3   1  229.78   19.60
   5  -3  -1  189.78   14.90
  -5  -3   1  241.98   19.90
  -5  -3   1  194.08   17.70
   5  -3  -1  215.28   14.80
  -5   3   1  198.98   16.40
   5   3  -1  249.97   20.10
   5   3  -1  217.88   18.10
  -5   3   1  220.58   14.50
   5   3  -1  197.68   19.30
  -4  -3   1  178.68   17.00
   4  -3  -1  226.08   14.30
  -4  -3   1  208.58   18.40
  -4  -3   1  187.88   18.00
   4   3  -1  212.18   17.30
   4   3  -1  202.58   18.40
   4   3  -1  208.98   18.30
  -4   3   1  199.18   13.80
  -3  -3   1  194.58   18.30
   3  -3  -1  235.88   14.90
  -3  -3   1  220.18   16.90
  -3  -3   1  214.98   17.20
   3   3  -1  227.88   18.40
   3   3  -1  231.48   17.60
   3   3  -1  233.28   17.40
  -3   3   1  178.88   13.60
   2  -3  -1  274.17   18.00
  -2  -3   1  253.17   20.00
  -2  -3   1  255.67   17.90
   2  -3  -1  282.67   17.40
   2   3  -1  269.87   18.30
  -2   3   1  294.27   17.40
   2   3  -1  262.57   18.80
  -1  -3   1  981.50   49.60
  -1  -3   1  945.81   48.40
   1  -3  -1  976.60   48.90
   1  -3  -1  921.21   47.40
   1  -3  -1  990.10   49.20
  -1  -3   1  914.01   55.19
  -1   3   1 1015.10   51.89
  -1   3   1 1010.10   48.70
   1   3  -1  952.50   49.30
   1   3  -1 1006.00   48.70
   1   3  -1  998.40   49.40
   0  -3   1  402.46   23.20
   0  -3   1  447.86   26.00
   0  -3  -1  441.06   25.70
   0  -3  -1  418.46   23.90
   0  -3   1  479.05   25.60
   0   3  -1  466.15   25.30
   0   3  -1  475.15   25.60
   0   3  -1  434.86   23.50
   0   3   1  463.45   25.00
  -1  -3  -1 1087.39   55.89
  -1  -3  -1 1177.28   58.39
   1  -3   1 1124.29   55.79
  -1  -3  -1 1126.89   56.39
   1   3   1 1131.59   55.89
  -1   3  -1 1117.89   55.69
  -1   3  -1 1080.19   54.09
  -2  -3  -1  863.91   44.60
  -2  -3  -1  864.01   46.80
  -2  -3  -1  820.12   44.30
   2  -3   1  888.31   43.90
   2   3   1  891.01   44.50
   2   3   1  889.71   49.99
  -2   3  -1  845.52   43.80
   3  -3   1  214.28   15.30
  -3  -3  -1  167.98   17.30
   3  -3   1  202.58   14.90
  -3  -3  -1  210.78   16.30
  -3  -3  -1  206.18   18.00
  -3   3  -1  194.88   16.60
  -3   3  -1  186.38   14.40
   3   3   1  192.88   17.30
   3   3   1  188.48   17.50
   3   3   1  204.58   16.30
  -4  -3  -1  176.18   17.40
   4  -3   1  168.48   14.00
   4  -3   1  182.18   14.00
  -4  -3  -1  145.39   18.00
  -4  -3  -1  171.38   15.80
  -4   3  -1  188.58   13.60
   4   3   1  145.29   17.40
   4   3   1  159.08   16.00
  -4   3  -1  166.48   15.70
   4   3   1  152.98   17.20
   5  -3   1   35.10    8.20
   5  -3   1   17.00    7.70
  -5  -3  -1   14.30   11.10
  -5  -3  -1   21.40   11.20
  -5  -3  -1   10.80    9.50
   5   3   1    7.70   10.10
  -5   3  -1   19.50    9.30
   5   3   1   22.30   10.10
   5   3   1   11.40   11.00
  -5   3  -1   28.40    7.50
  -6  -3  -1  110.99   15.50
   6  -3   1   77.89   10.70
   6  -3   1  100.69   10.70
  -6  -3  -1  115.29   12.80
  -6  -3  -1  106.89   14.30
  -6   3  -1  102.69   11.90
  -6   3  -1   70.39    8.40
   6   3   1  105.29   14.30
   6   3   1  100.69   13.70
  -6   3  -1   69.19   11.70
   6   3   1   76.79   12.20
   7  -3   1  112.19   14.80
  -7  -3  -1  162.98   16.80
   7  -3   1  154.18   14.90
  -7  -3  -1  127.89   16.60
  -7  -3  -1  127.49   14.80
  -7   3  -1  155.68   16.30
   7   3   1  143.99   18.20
  -7   3  -1   94.89   15.70
   7   3   1  147.69   16.00
  -7   3  -1  108.79   11.80
   7   3   1  156.18   18.20
  -8  -3  -1  534.65   35.70
  -8  -3  -1  651.13   37.90
   8  -3   1  651.93   34.20
  -8  -3  -1  610.84   38.50
   8   3   1  655.93   37.70
   8   3   1  621.84   38.90
   8   3   1  568.44   37.20
  -8   3  -1  667.13   35.60
  -8   3  -1  564.94   34.80
   9  -3   1  272.27   20.80
  -9  -3  -1  241.48   26.10
  -9  -3  -1  211.58   22.40
  -9  -3  -1  295.07   26.50
   9  -3   1  229.88   20.80
  -9   3  -1  230.18   18.90
   9   3   1  259.57   27.40
  -9   3  -1  241.98   21.70
   9   3   1  302.37   24.50
   9   3   1  259.37   24.60
 -10  -3  -1   66.09   14.60
 -10  -3  -1   62.79   17.10
 -10  -3  -1   43.00   17.10
  10  -3   1   63.69   13.20
  10  -3   1   54.39   13.70
 -10   3  -1   80.19   14.30
  10   3   1   65.29   20.00
 -10   3  -1   72.29   12.90
  10   3   1   79.19   16.50
  10   3   1   73.09   15.70
  11  -3   1   46.20   14.40
 -11  -3  -1   49.50   17.30
  11  -3   1   47.60   13.50
 -11  -3  -1   44.00   14.80
 -11  -3  -1   21.90   17.10
  11   3   1   45.80   16.60
 -11   3  -1   64.09   14.70
  11   3   1   55.59   18.40
  11   3   1   60.29   18.10
 -11   3  -1   33.30   13.10
 -12  -3  -1  198.58   27.40
  12  -3   1  143.69   18.40
 -12  -3  -1  148.79   19.00
  12  -3   1  148.39   17.60
 -12  -3  -1  160.78   22.50
 -12   3  -1  144.99   20.60
 -12   3  -1  192.38   22.90
  12   3   1  121.49   21.00
  12   3   1  124.09   20.60
 -13  -3  -1   26.20   21.30
  13  -3   1   59.89   16.30
  13  -3   1   32.30   15.60
 -13  -3  -1   38.20   26.60
 -13  -3  -1   18.80   18.40
 -13   3  -1   43.20   15.90
 -13   3  -1   50.29   15.20
  13   3   1   49.30   18.90
 -14  -3  -1   32.00   17.90
  14  -3   1   10.70   16.30
 -14  -3  -1   17.60   20.20
  14  -3   1   33.20   16.00
 -14   3  -1   28.30   16.20
 -14   3  -1   39.40   16.40
  14   3   1   13.20   19.30
  13  -4  -1  178.18   23.00
 -13  -4   1  155.88   22.60
 -13   4   1  218.58   26.10
  13   4  -1  183.38   23.80
  13   4  -1  168.18   24.00
 -12  -4   1   92.89   21.00
 -12  -4   1   84.19   19.00
  12  -4  -1   76.29   14.90
 -12  -4   1   93.09   23.30
  12  -4  -1  117.09   15.20
  12   4  -1  101.49   20.90
  12   4  -1   98.09   19.70
  12   4  -1  100.19   21.50
 -12   4   1   87.29   15.90
 -12   4   1  121.99   16.10
 -11  -4   1   93.59   22.20
  11  -4  -1  119.39   16.30
  11  -4  -1  141.59   17.30
 -11  -4   1   93.59   19.60
 -11  -4   1  153.98   22.60
 -11   4   1   97.99   14.20
  11   4  -1  105.09   20.30
  11   4  -1  149.79   24.10
  11   4  -1  158.48   24.40
 -11   4   1  124.89   16.30
 -10  -4   1  126.89   22.90
  10  -4  -1  128.09   13.70
 -10  -4   1   66.29   18.80
 -10  -4   1  110.49   19.70
  10  -4  -1   80.39   14.50
 -10   4   1  103.29   14.90
  10   4  -1   90.09   20.10
 -10   4   1  112.79   15.70
  10   4  -1   91.89   18.40
  10   4  -1  119.19   21.40
  -9  -4   1  177.88   25.90
   9  -4  -1  171.98   17.80
   9  -4  -1  195.48   17.90
  -9  -4   1  216.38   24.60
  -9  -4   1  201.98   22.10
  -9   4   1  203.78   18.20
   9   4  -1  223.18   24.70
   9   4  -1  183.78   26.30
   9   4  -1  203.08   23.20
  -9   4   1  191.18   20.30
  -8  -4   1    9.50   15.30
  -8  -4   1   29.90   14.70
   8  -4  -1   24.60   10.10
  -8  -4   1   25.50   12.90
   8  -4  -1   12.90    9.90
   8   4  -1   12.40   13.90
  -8   4   1   13.30   12.30
   8   4  -1   35.80   19.30
   8   4  -1   11.40   14.50
  -8   4   1   21.30    9.80
  -7  -4   1  339.37   26.40
   7  -4  -1  312.97   20.90
  -7  -4   1  327.67   27.30
   7  -4  -1  315.07   21.00
  -7  -4   1  261.57   24.00
  -7   4   1  309.17   20.70
   7   4  -1  305.17   25.10
   7   4  -1  312.27   26.50
   7   4  -1  309.47   27.30
  -6  -4   1  381.16   27.30
  -6  -4   1  353.26   26.00
  -6  -4   1  374.56   27.60
   6  -4  -1  348.27   23.10
  -6   4   1  366.36   22.40
   6   4  -1  367.76   26.20
   6   4  -1  381.36   27.90
   6   4  -1  315.47   26.90
  -5  -4   1 1216.48   60.39
  -5  -4   1 1051.09   58.99
   5  -4  -1 1131.49   57.99
  -5  -4   1 1201.98   59.89
   5   4  -1 1134.29   59.29
   5   4  -1 1168.08   59.89
   5   4  -1 1147.49   60.09
  -5   4   1 1071.49   57.09
  -4  -4   1   43.40   12.10
  -4  -4   1   10.10   11.30
   4  -4  -1   34.50    8.60
   4   4  -1   16.60   11.50
  -4   4   1   36.90    8.40
   4   4  -1   36.80   12.00
  -4   4   1   21.60    9.60
   3  -4  -1   80.69   10.50
   3  -4  -1   97.59   11.70
  -3  -4   1   68.69   11.90
  -3  -4   1  105.69   14.20
   3   4  -1   74.89   12.30
   3   4  -1  102.19   12.90
  -3   4   1  109.29   13.30
  -2  -4   1  364.26   24.90
   2  -4  -1  416.56   23.40
  -2  -4   1  350.46   22.80
   2  -4  -1  391.56   23.80
  -2  -4   1  428.86   25.80
  -2   4   1  400.06   23.10
   2   4  -1  351.46   24.20
   2   4  -1  371.66   23.20
   2   4  -1  340.27   26.00
  -1  -4   1  486.45   28.80
   1  -4  -1  491.25   27.80
   1  -4  -1  497.35   28.40
  -1  -4   1  435.36   26.40
   1  -4  -1  451.05   24.60
  -1  -4   1  507.05   29.40
   1   4  -1  540.55   31.10
  -1   4   1  487.75   27.50
  -1   4   1  479.95   27.20
   1   4  -1  460.45   28.20
   1   4  -1  496.45   28.40
   0  -4  -1  158.38   17.10
   0  -4   1  211.68   17.00
   0  -4  -1  190.88   17.50
   0  -4   1  214.08   18.00
   0  -4  -1  140.49   14.20
   0   4   1  188.58   16.10
   0   4  -1  216.18   17.00
   0   4  -1  167.08   16.10
   0   4   1  191.18   15.70
   1  -4   1  105.39   11.70
  -1  -4  -1  125.29   16.10
  -1  -4  -1   74.69   11.00
   1  -4   1  107.99   13.30
  -1   4  -1  108.49   12.30
   1   4   1  123.89   14.50
  -1   4  -1  107.49   13.60
  -2  -4  -1  400.66   25.80
   2  -4   1  449.36   28.60
  -2  -4  -1  453.95   27.40
   2  -4   1  410.06   25.50
   2   4   1  430.76   26.10
  -2   4  -1  392.16   25.90
  -2   4  -1  454.35   25.20
  -3  -4  -1  665.23   38.40
  -3  -4  -1  776.42   39.60
   3  -4   1  686.03   37.90
  -3  -4  -1  683.23   39.00
  -3   4  -1  678.73   37.30
   3   4   1  719.43   39.20
   3   4   1  696.63   38.50
   4  -4   1  225.48   18.20
  -4  -4  -1  248.18   21.20
  -4  -4  -1  179.58   20.70
  -4  -4  -1  218.78   19.60
   4   4   1  227.88   19.60
   4   4   1  199.28   20.80
  -4   4  -1  221.38   17.00
  -5  -4  -1  303.37   25.00
  -5  -4  -1  308.97   25.70
   5  -4   1  324.07   22.00
  -5  -4  -1  298.27   23.80
  -5   4  -1  370.06   24.50
   5   4   1  334.47   24.20
  -5   4  -1  297.17   21.60
   5   4   1  337.27   25.50
   6  -4   1  192.28   16.80
  -6  -4  -1  157.28   22.50
  -6  -4  -1  148.89   19.70
  -6  -4  -1  166.28   21.30
   6  -4   1  179.98   17.40
   6   4   1  198.08   21.90
   6   4   1  180.08   22.40
   6   4   1  184.38   20.40
  -6   4  -1  215.18   21.20
  -7  -4  -1  201.98   28.70
   7  -4   1  186.48   19.10
  -7  -4  -1  199.68   23.50
  -7  -4  -1  197.28   21.30
   7  -4   1  236.78   18.90
   7   4   1  240.48   24.60
   7   4   1  208.78   21.50
  -7   4  -1  199.68   20.90
   7   4   1  221.78   23.90
  -8  -4  -1  160.18   21.50
  -8  -4  -1  105.99   18.30
   8  -4   1  155.88   17.40
   8  -4   1  128.09   15.00
   8   4   1  162.48   22.10
  -8   4  -1  151.98   19.70
   8   4   1  140.49   18.40
   9  -4   1   34.90   12.40
  -9  -4  -1   17.90   16.20
  -9  -4  -1   19.10   13.70
  -9  -4  -1   50.09   17.30
   9  -4   1   45.70   11.70
   9   4   1   44.00   18.20
  -9   4  -1   46.60   14.30
   9   4   1   23.80   16.20
  10  -4   1   59.19   12.80
 -10  -4  -1   75.19   16.50
 -10  -4  -1   50.89   18.80
 -10  -4  -1   37.40   27.20
  10  -4   1   53.19   14.80
  10   4   1   70.69   18.50
 -10   4  -1   22.60    9.10
 -10   4  -1   35.90   14.40
  10   4   1   49.30   16.80
  11  -4   1   48.40   13.20
  11  -4   1   24.50   13.70
 -11  -4  -1   19.60   15.90
 -11  -4  -1   47.40   18.70
 -11  -4  -1    7.40   17.70
 -11   4  -1   43.20   13.10
  11   4   1   12.30   16.40
  11   4   1   54.09   18.00
 -11   4  -1   45.20   15.00
  12  -4   1   22.90   13.40
 -12  -4  -1   -3.60   20.80
 -12  -4  -1   18.40   17.30
 -12   4  -1  -11.60   11.70
 -12   4  -1    5.00    9.90
  12   4   1   -0.60   18.80
  12   4   1    8.50   18.10
 -11  -5   1   -3.90   25.10
 -11  -5   1   32.80   19.40
  11  -5  -1    9.00   15.50
  11   5  -1   -1.90   17.70
  11   5  -1   13.20   20.70
  11   5  -1   34.00   18.20
 -10  -5   1   41.50   18.50
 -10  -5   1   59.09   20.40
 -10  -5   1   64.49   20.80
  10  -5  -1   62.09   13.40
  10   5  -1   60.89   19.90
  10   5  -1   78.69   21.30
  10   5  -1  106.39   21.00
  -9  -5   1   35.80   17.40
   9  -5  -1   23.30   12.00
  -9  -5   1   10.50   14.80
  -9  -5   1   -1.50   19.30
   9   5  -1  -12.50   16.10
  -9   5   1   14.60   10.20
   9   5  -1   -8.30   16.90
   9   5  -1    8.50   17.00
  -8  -5   1  138.69   19.70
  -8  -5   1  195.88   23.50
  -8  -5   1  149.88   21.40
  -8   5   1  191.48   20.30
   8   5  -1  180.38   21.80
   8   5  -1  175.88   25.50
   8   5  -1  148.99   21.40
   7  -5  -1   53.29   11.90
  -7  -5   1   38.60   14.80
  -7  -5   1   55.39   16.50
  -7  -5   1   82.49   23.90
   7   5  -1   59.99   15.70
   7   5  -1   67.09   18.20
   6  -5  -1  127.99   17.00
  -6  -5   1  150.38   21.20
  -6  -5   1  132.19   19.00
  -6   5   1  138.89   15.60
   6   5  -1  119.59   18.00
  -6   5   1  166.28   17.60
   6   5  -1  178.98   20.40
  -5  -5   1   80.29   16.60
  -5  -5   1   87.69   15.80
   5  -5  -1  100.39   13.20
   5  -5  -1  104.59   14.30
  -5   5   1   92.79   13.50
   5   5  -1  104.79   16.20
   5   5  -1  140.49   17.60
  -5   5   1   78.59   11.70
   4  -5  -1   76.79   12.40
  -4  -5   1   73.09   15.40
   4  -5  -1   83.79   13.50
  -4  -5   1   63.89   14.20
  -4   5   1   72.79   12.60
   4   5  -1   80.29   14.30
   4   5  -1   81.59   15.00
  -4   5   1   68.19   11.10
   4   5  -1   77.39   14.50
  -3  -5   1  222.08   22.50
   3  -5  -1  237.78   19.50
  -3  -5   1  185.28   22.20
   3  -5  -1  199.08   19.60
   3   5  -1  213.58   20.60
  -3   5   1  235.78   18.80
   3   5  -1  213.38   20.70
  -2  -5   1  409.56   29.30
  -2  -5   1  378.46   25.50
   2  -5  -1  481.35   28.10
   2  -5  -1  415.26   27.30
  -2  -5   1  398.76   28.80
   2   5  -1  411.86   28.00
  -2   5   1  466.95   27.10
   2   5  -1  432.26   28.10
  -1  -5   1  466.05   26.50
   1  -5  -1  466.35   28.80
   1  -5  -1  444.86   31.70
  -1  -5   1  458.25   31.00
  -1  -5   1  463.15   30.10
  -1   5   1  506.55   29.30
   1   5  -1  471.45   29.60
   1   5  -1  444.16   31.50
  -1   5   1  476.45   28.30
   0  -5   1  270.97   22.20
   0  -5  -1  245.18   22.00
   0  -5  -1  279.17   22.40
   0  -5   1  239.18   22.70
   0   5  -1  287.77   21.90
   0   5   1  270.27   20.80
   0   5  -1  300.77   21.70
   0   5   1  280.87   21.50
   1  -5   1  221.88   20.50
  -1  -5  -1  160.38   20.20
   1  -5   1  229.88   20.60
  -1  -5  -1  173.48   20.40
  -1  -5  -1  150.68   16.50
  -1   5  -1  210.88   19.20
   1   5   1  186.08   18.70
  -1   5  -1  230.58   19.10
   1   5   1  208.38   19.10
  -2  -5  -1  -16.00   10.80
   2  -5   1   24.00   12.20
  -2  -5  -1   40.10   13.20
   2  -5   1   52.89   12.30
   2   5   1   17.60   11.30
   2   5   1   17.20   11.90
  -2   5  -1   45.20   11.10
  -2   5  -1   37.10   12.10
   3  -5   1  314.37   23.80
   3  -5   1  311.27   23.50
  -3  -5  -1  310.27   25.80
  -3  -5  -1  251.17   23.20
   3   5   1  328.07   24.40
  -3   5  -1  308.47   22.10
  -3   5  -1  303.27   23.00
   4  -5   1  152.58   18.10
  -4  -5  -1  114.89   17.40
   4  -5   1  174.78   17.50
  -4  -5  -1  126.39   17.40
  -4   5  -1  130.99   16.30
  -4   5  -1  161.58   18.30
   4   5   1  139.89   17.10
  -5  -5  -1    7.30   14.20
   5  -5   1   26.10   11.50
  -5  -5  -1   34.80   14.40
  -5  -5  -1   34.20   13.80
  -5   5  -1   24.90   12.80
   5   5   1   27.60   13.80
   5   5   1   49.50   15.40
  -6  -5  -1   70.09   15.30
  -6  -5  -1   86.69   16.80
   6  -5   1   70.09   14.20
  -6  -5  -1   73.99   21.80
   6   5   1   90.79   16.50
   6   5   1   69.29   16.70
   7  -5   1    6.20   12.40
  -7  -5  -1    8.60   19.40
  -7  -5  -1    9.70   14.20
  -7  -5  -1   -3.20   16.40
   7   5   1    3.90   14.40
   7   5   1   26.10   15.40
  -8  -5  -1   44.70   17.40
  -8  -5  -1   81.89   20.10
  -8  -5  -1   49.90   15.90
   8  -5   1   75.39   15.80
  -8   5  -1   61.59   11.70
   8   5   1   55.19   16.90
   8   5   1   80.39   18.60
  -9  -5  -1   65.79   18.60
  -9  -5  -1   45.00   20.00
   9  -5   1   70.69   14.10
   9  -5   1   43.30   16.60
  -9   5  -1   55.59   13.10
   9   5   1   35.60   16.50
   9   5   1   62.99   18.40
 -10  -5  -1   43.30   19.40
 -10  -5  -1   53.59   22.00
 -10  -5  -1   76.59   18.60
  10  -5   1   64.39   14.60
  10   5   1   59.19   19.90
 -10   5  -1   56.79   14.10
  10   5   1   68.29   20.00
   7  -6  -1   56.99   13.40
  -7  -6   1   26.10   16.80
  -7  -6   1   45.50   17.70
  -7   6   1   45.10   14.80
  -7   6   1   41.60   11.40
   7   6  -1   59.79   19.90
  -6  -6   1   15.70   15.00
  -6  -6   1    4.90   17.40
   6  -6  -1   22.40   13.10
  -6   6   1    8.70   14.60
  -6   6   1    1.40   11.00
   6   6  -1    5.70   16.60
   6   6  -1   13.40   13.80
  -5  -6   1  -10.80   13.90
   5  -6  -1   27.70   12.90
  -5  -6   1    9.50   16.30
   5  -6  -1   14.50   11.70
   5   6  -1    9.20   15.20
   5   6  -1    8.90   13.30
  -5   6   1   -9.70   10.60
   4  -6  -1  -10.40   11.20
  -4  -6   1   20.70   15.00
  -4  -6   1    7.10   12.50
  -4  -6   1   -3.40   14.80
   4  -6  -1    5.60   15.00
  -4   6   1    0.00   10.70
   4   6  -1   28.70   15.60
   4   6  -1   17.80   13.10
  -4   6   1   -2.20   12.40
  -3  -6   1   19.40   14.60
  -3  -6   1   44.90   12.10
  -3  -6   1   50.69   15.80
   3  -6  -1   44.00   15.40
   3  -6  -1   24.60   12.70
   3   6  -1   45.10   15.10
  -3   6   1   56.49   14.60
   3   6  -1   43.60   13.60
   2  -6  -1   40.10   13.20
  -2  -6   1   29.90   10.70
  -2  -6   1   43.80   14.60
   2  -6  -1   41.90   14.10
  -2  -6   1   38.70   15.60
  -2   6   1   40.20   13.70
   2   6  -1   24.40   14.00
   2   6  -1   40.80   13.10
  -2   6   1   56.19   14.20
  -1  -6   1   67.69   15.20
   1  -6  -1   67.79   15.30
   1  -6  -1   59.29   14.40
  -1  -6   1   49.99   15.10
  -1   6   1   68.89   14.60
   1   6  -1   60.09   14.60
   1   6  -1   72.99   13.70
  -1   6   1   54.99   14.50
   0  -6  -1   75.39   14.30
   0  -6   1   59.89   15.40
   0  -6  -1   66.69   15.70
   0  -6   1   72.69   14.80
   0   6   1   63.39   14.00
   0   6  -1   43.50   15.30
   0   6   1   64.89   12.60
   0   6  -1   61.09   14.50
  -1  -6  -1   23.50   13.40
  -1  -6  -1   16.40    9.30
  -1  -6  -1   23.70   13.40
   1  -6   1   32.70   14.40
   1  -6   1   26.20   13.40
  -1   6  -1   41.80   11.90
   1   6   1    6.60   14.70
  -1   6  -1   24.00   13.40
   1   6   1   30.00   11.80
   2  -6   1   59.19   15.10
  -2  -6  -1   72.49   16.80
  -2  -6  -1   49.00   12.30
   2  -6   1   53.89   13.80
  -2  -6  -1   43.90   15.20
  -2   6  -1   65.29   15.10
   2   6   1   62.59   14.90
  -2   6  -1   55.09   14.90
   3  -6   1   20.10   12.90
  -3  -6  -1   27.10   15.70
  -3  -6  -1   10.80   12.40
  -3  -6  -1    1.70   14.60
   3  -6   1   45.30   14.30
  -3   6  -1   32.40   14.00
   3   6   1   12.30   12.30
  -3   6  -1   18.10   13.20
   3   6   1   13.70   13.70
  -4  -6  -1   27.60   15.10
   4  -6   1   47.40   14.60
  -4  -6  -1   25.50   13.90
  -4  -6  -1   26.10   15.40
   4  -6   1   13.00   12.80
  -4   6  -1    2.50   14.40
   4   6   1    8.40   14.70
   4   6   1   17.70   12.50
  -4   6  -1   34.20   13.70
  -5  -6  -1   83.29   17.80
   5  -6   1   77.89   15.30
  -5  -6  -1   93.59   19.50
   5   6   1   73.79   17.50
  -6  -6  -1  -16.20   14.40
   6  -6   1   27.00   13.50
   6  -6   1   12.70   13.40
  -6  -6  -1   -6.90   16.00
  -6   6  -1   22.80   14.20
  -7  -6  -1   28.90   19.00
  -7  -6  -1   27.80   17.10
   7  -6   1   20.90   13.10
   7  -6   1   39.00   13.70
  -7   6  -1   13.70   12.20
  -7   6  -1   52.49   14.70
 -16   0   2   12.10   17.20
 -16   0   2  -17.20   18.90
 -16   0   2   -3.60   18.10
  16   0  -2    4.50   18.40
  16   0  -2   14.70   18.40
  16   0  -2   -1.30   20.10
 -15   0   2   51.19   15.30
  15   0  -2   29.40   17.80
 -15   0   2   14.20   23.00
  15   0  -2   64.59   17.00
  15   0  -2   48.80   18.70
 -15   0   2   29.40   16.10
 -14   0   2   40.30   16.80
 -14   0   2   31.20   15.80
 -14   0   2   67.19   14.70
  14   0  -2   83.39   19.00
  14   0  -2   56.29   17.20
  13   0  -2  412.56   29.80
 -13   0   2  378.86   29.40
  13   0  -2  398.16   31.00
 -13   0   2  377.46   29.10
  13   0  -2  375.66   29.50
 -13   0   2  360.66   26.70
  12   0  -2  330.77   28.70
 -12   0   2  359.26   28.20
 -12   0   2  328.87   25.20
  12   0  -2  372.96   27.20
 -12   0   2  345.27   26.50
  12   0  -2  302.97   26.10
  11   0  -2   29.50   13.60
  11   0  -2   29.20   12.40
 -11   0   2   35.90   11.10
 -11   0   2   33.50   13.80
  11   0  -2   14.00   12.20
 -11   0   2   21.80   12.40
 -10   0   2  393.96   24.90
 -10   0   2  440.96   26.90
  10   0  -2  386.26   28.20
  10   0  -2  413.96   26.70
  -9   0   2  416.26   25.90
  -9   0   2  394.96   24.40
   9   0  -2  459.85   28.30
   9   0  -2  430.46   25.80
  -9   0   2  428.76   27.30
   9   0  -2  357.96   25.70
   8   0  -2   10.30    8.80
  -8   0   2   -1.90   10.00
   8   0  -2   13.40   10.50
  -8   0   2    9.00    7.80
   8   0  -2    2.20    8.90
  -8   0   2   22.60    9.50
   7   0  -2   -9.60   10.00
  -7   0   2    1.80    7.30
   7   0  -2    2.60    8.20
  -7   0   2   -1.10    9.50
  -7   0   2   -8.20    8.60
   7   0  -2   -3.30    8.20
  -6   0   2 1167.78   55.49
   6   0  -2 1153.88   55.39
  -6   0   2 1149.29   56.59
   6   0  -2 1054.69   56.59
   6   0  -2 1056.09   55.49
  -5   0   2  617.44   29.90
   5   0  -2  528.35   29.70
  -5   0   2  558.24   30.60
   5   0  -2  558.74   29.50
   4   0  -2 1116.59   54.39
   4   0  -2 1111.99   54.59
   4   0  -2 1133.19   55.79
  -4   0   2 1137.49   55.49
  -4   0   2 1083.99   54.49
  -2   0   2 3380.46  170.18
  -2   0   2 3594.54  170.78
   2   0  -2 3755.32  170.78
   1   0  -2 2710.93  124.99
   1   0  -2 2551.84  124.99
  -1   0   2 2614.14  124.99
   0   0   2  207.88   11.90
   0   0  -2  217.58   11.50
   0   0   2  216.98   11.90
   0   0  -2  212.58   11.90
  -1   0  -2 2964.50  137.99
   1   0   2 2900.01  137.99
  -1   0  -2 2880.21  138.09
   1   0   2 2818.02  138.09
  -3   0  -2  334.87   20.10
   3   0   2  335.17   20.40
  -3   0  -2  276.37   20.30
   3   0   2  329.57   19.80
  -3   0  -2  369.36   19.50
  -4   0  -2 1982.30   94.29
   4   0   2 1906.91   94.09
   4   0   2 1909.61   93.99
  -4   0  -2 1867.51   94.49
  -4   0  -2 2025.10   93.99
   5   0   2 1537.45   75.29
  -5   0  -2 1597.74   75.19
  -5   0  -2 1547.15   75.99
   5   0   2 1477.55   75.49
  -5   0  -2 1489.75   75.29
  -6   0  -2   12.60    8.40
   6   0   2   24.60    9.10
   6   0   2    3.90    9.70
  -6   0  -2   17.60    9.80
  -6   0  -2   16.60   10.60
   7   0   2   11.00    9.40
  -7   0  -2   10.30    8.90
  -7   0  -2   18.70   10.10
   7   0   2   21.10   10.00
  -7   0  -2   26.40   11.20
  -8   0  -2   37.00   11.70
  -8   0  -2   32.50   11.20
   8   0   2   60.99   11.80
   8   0   2   39.50   11.00
  -9   0  -2  396.86   26.70
   9   0   2  361.56   26.90
  -9   0  -2  389.46   27.40
  -9   0  -2  424.36   25.90
   9   0   2  401.66   29.00
 -10   0  -2    2.40   10.80
 -10   0  -2  -13.60   12.00
 -10   0  -2  -14.50   12.00
  10   0   2   -3.10   12.40
  10   0   2   -2.20   11.80
 -11   0  -2   67.49   13.80
 -11   0  -2   54.69   14.70
  11   0   2   57.99   14.90
  11   0   2   74.99   15.30
 -11   0  -2   37.10   32.00
  12   0   2   32.50   15.40
 -12   0  -2   61.79   16.20
  12   0   2   82.49   16.70
 -12   0  -2   15.30   14.60
 -12   0  -2   42.10   14.10
 -13   0  -2  196.38   22.40
 -13   0  -2  190.68   26.80
 -13   0  -2  174.88   20.90
  13   0   2  209.98   25.40
 -14   0  -2  132.59   17.70
  14   0   2  108.09   20.50
 -14   0  -2  118.49   28.60
 -14   0  -2  135.59   20.20
  14   0   2  138.59   20.80
 -15   0  -2   -2.10   15.90
 -15   0  -2   24.10   19.40
  15   0   2   18.90   20.00
  15   0   2   20.80   18.70
 -15   0  -2   19.00   17.10
  16  -1  -2   33.90   17.40
 -16  -1   2    5.50   17.00
  16  -1  -2   45.50   18.60
  16  -1  -2   23.50   19.70
 -16  -1   2   12.60   17.30
 -16   1   2   -4.20   18.50
 -16   1   2   11.40   18.50
  16   1  -2    2.70   21.00
  16   1  -2   40.10   30.90
  16   1  -2   34.30   20.10
 -15  -1   2   29.90   15.30
 -15  -1   2   41.20   17.70
  15  -1  -2   58.19   17.90
  15  -1  -2   36.40   18.60
 -15  -1   2   26.30   17.80
  15  -1  -2   35.10   16.10
  15   1  -2   41.50   19.10
  15   1  -2   46.80   21.00
  15   1  -2   11.10   18.30
 -15   1   2   14.80   15.30
 -15   1   2    9.30   16.90
 -14  -1   2   42.40   16.50
  14  -1  -2   42.30   18.50
 -14  -1   2   36.60   16.20
 -14  -1   2   26.30   18.20
  14  -1  -2   29.70   15.70
  14   1  -2   45.00   17.30
 -14   1   2   19.70   14.70
  14   1  -2   50.09   19.40
 -14   1   2   18.80   15.40
  13  -1  -2  118.99   18.10
  13  -1  -2  153.78   17.60
  13  -1  -2  167.08   24.40
 -13  -1   2  112.79   18.70
 -13  -1   2  118.69   16.90
 -13  -1   2  103.69   17.90
 -13   1   2  133.19   17.00
 -13   1   2  120.49   20.00
  13   1  -2  116.99   18.30
  13   1  -2  144.49   20.30
  13   1  -2  168.78   23.30
  12  -1  -2  136.49   18.30
 -12  -1   2  105.19   18.70
 -12  -1   2  136.19   17.50
  12  -1  -2   89.09   16.00
  12  -1  -2  131.29   15.90
 -12   1   2  109.59   16.50
  12   1  -2   98.39   17.90
 -12   1   2   98.59   15.30
  12   1  -2  126.29   18.20
  12   1  -2  106.89   17.20
 -11  -1   2   34.60   14.20
  11  -1  -2   26.90   12.40
  11  -1  -2   55.39   15.20
 -11  -1   2   48.70   13.50
  11  -1  -2   23.10   12.70
 -11  -1   2   50.89   12.70
  11   1  -2   45.50   13.40
 -11   1   2   16.40   12.50
  11   1  -2   57.89   17.40
 -11   1   2   40.30   13.40
  11   1  -2   49.50   16.80
  10  -1  -2   46.90   10.60
 -10  -1   2   50.49   11.40
  10  -1  -2   26.50   11.30
 -10  -1   2   52.59   12.40
  10  -1  -2   68.09   13.30
 -10  -1   2   45.70   14.30
  10   1  -2   49.00   12.40
 -10   1   2   52.89   11.30
  10   1  -2   37.50   12.10
  10   1  -2   43.50   14.70
 -10   1   2   44.20   12.10
   9  -1  -2  419.36   24.00
  -9  -1   2  396.56   24.50
   9  -1  -2  360.16   24.40
   9  -1  -2  406.96   26.00
  -9  -1   2  382.86   25.60
  -9  -1   2  433.96   27.60
   9   1  -2  331.47   25.70
   9   1  -2  415.86   28.50
  -9   1   2  436.76   24.20
  -9   1   2  386.86   25.30
  -9   1   2  316.07   22.50
   9   1  -2  406.06   25.50
   8  -1  -2  210.78   18.70
   8  -1  -2  206.88   17.00
  -8  -1   2  238.88   20.50
  -8  -1   2  216.98   18.70
   8  -1  -2  228.08   16.40
  -8  -1   2  221.48   17.10
  -8   1   2  242.78   15.60
  -8   1   2  224.68   16.80
   8   1  -2  208.08   18.90
   8   1  -2  207.68   18.30
  -8   1   2  200.48   18.00
   8   1  -2  234.38   21.00
  -7  -1   2  175.38   15.00
  -7  -1   2  174.58   18.10
  -7  -1   2  172.28   16.50
   7  -1  -2  155.08   15.90
   7  -1  -2  173.38   13.50
   7  -1  -2  158.18   14.60
   7   1  -2  137.19   16.50
   7   1  -2  151.88   15.50
  -7   1   2  152.58   15.30
   7   1  -2  165.78   18.80
  -7   1   2  181.28   13.40
  -7   1   2  145.89   14.10
  -6  -1   2  634.54   34.00
   6  -1  -2  668.63   32.20
  -6  -1   2  671.83   33.40
   6  -1  -2  607.14   32.60
   6  -1  -2  710.03   39.80
  -6  -1   2  641.04   35.10
   6   1  -2  553.44   35.00
   6   1  -2  621.44   33.70
  -6   1   2  652.83   32.10
  -6   1   2  622.74   32.30
   6   1  -2  573.44   34.00
  -6   1   2  579.34   33.20
  -5  -1   2  849.32   42.70
   5  -1  -2  890.31   41.00
   5  -1  -2  861.01   41.30
   5  -1  -2  774.82   41.90
  -5  -1   2  870.21   43.70
  -5  -1   2  866.31   42.20
  -5   1   2  813.72   42.10
  -5   1   2  915.21   41.10
   5   1  -2  741.13   42.50
   5   1  -2  790.52   42.30
  -5   1   2  821.42   41.00
   5   1  -2  769.52   43.70
  -4  -1   2 2576.04  122.09
   4  -1  -2 2620.94  120.39
   4  -1  -2 2368.16  121.09
  -4  -1   2 2607.44  121.29
   4  -1  -2 2842.82  120.69
  -4   1   2 2359.66  120.39
   4   1  -2 2507.45  121.39
  -4   1   2 2705.33  120.49
   4   1  -2 2346.67  121.49
  -4   1   2 2358.46  121.09
   4   1  -2 2455.75  123.09
  -3  -1   2 2572.64  118.99
  -3  -1   2 2525.55  118.39
  -3  -1   2 2470.95  118.69
   3  -1  -2 2557.34  117.49
   3  -1  -2 2448.26  118.09
  -3   1   2 2253.47  117.99
   3   1  -2 2440.86  118.49
   3   1  -2 2569.24  119.19
   3   1  -2 2455.85  118.69
  -3   1   2 2373.96  117.49
   2   1  -2 6171.28  286.37
   2   1  -2 5902.51  285.97
   2   1  -2 5937.01  286.17
   1  -1  -2 1339.37   62.29
   1  -1  -2 1286.47   62.39
  -1  -1   2 1247.98   63.09
  -1  -1   2 1197.28   62.99
   1   1  -2 1292.67   63.09
   1   1  -2 1253.87   63.09
  -1   1   2 1477.55   62.39
   0  -1   2 1768.42   90.39
   0  -1   2 1749.62   90.39
   0  -1  -2 1915.81   90.29
   0  -1  -2 2047.80   90.19
   0   1   2 2065.99   90.19
   0   1  -2 1753.82   90.49
   0   1   2 1933.51   90.29
   0   1  -2 1810.02   90.39
   1  -1   2 4110.19  206.28
   1  -1   2 4136.99  206.28
  -1  -1  -2 4623.14  206.38
  -1  -1  -2 4453.45  206.38
   1   1   2 4343.77  206.38
   1   1   2 4807.02  206.38
  -1   1  -2 4052.29  206.28
  -1   1  -2 4075.79  206.28
  -2  -1  -2 3057.79  141.59
  -2  -1  -2 3015.10  141.09
  -2  -1  -2 3065.09  140.99
   2  -1   2 3026.90  140.99
   2  -1   2 2802.02  140.79
   2   1   2 3068.99  140.99
   2   1   2 2946.91  140.99
  -2   1  -2 2732.43  140.79
  -2   1  -2 2750.42  140.69
   3  -1   2 1242.18   61.59
  -3  -1  -2 1315.97   61.99
  -3  -1  -2 1284.07   62.29
  -3  -1  -2 1277.17   62.79
   3  -1   2 1225.58   61.69
  -3   1  -2 1265.77   61.99
   3   1   2 1281.27   62.09
  -3   1  -2 1176.18   61.49
   3   1   2 1266.67   62.19
  -4  -1  -2  556.84   33.00
   4  -1   2  550.44   29.30
  -4  -1  -2  541.75   31.10
  -4  -1  -2  540.85   31.90
   4  -1   2  534.85   29.10
   4   1   2  532.15   30.00
  -4   1  -2  563.04   28.80
  -4   1  -2  515.15   29.30
  -4   1  -2  523.85   28.90
   4   1   2  552.14   30.20
  -5  -1  -2  601.84   31.90
   5  -1   2  568.94   31.90
  -5  -1  -2  635.64   34.10
  -5  -1  -2  624.64   33.00
   5  -1   2  622.74   31.70
   5   1   2  566.54   33.10
  -5   1  -2  574.34   31.90
   5   1   2  551.94   32.60
   5   1   2  504.65   33.70
  -5   1  -2  609.64   31.60
  -5   1  -2  604.84   32.10
   6  -1   2 1285.27   60.89
  -6  -1  -2 1234.88   60.99
   6  -1   2 1147.19   60.89
  -6  -1  -2 1223.38   62.49
  -6  -1  -2 1213.78   61.49
   6   1   2 1169.18   61.29
   6   1   2 1092.59   62.39
  -6   1  -2 1258.47   60.79
  -6   1  -2 1225.48   60.89
   6   1   2 1260.17   61.39
  -6   1  -2 1275.47   61.29
  -7  -1  -2  171.08   17.70
   7  -1   2  153.18   16.60
   7  -1   2  151.28   15.50
  -7  -1  -2  137.29   15.70
  -7  -1  -2  149.09   18.00
   7   1   2  146.79   19.20
   7   1   2  148.69   17.60
  -7   1  -2  161.48   16.10
  -7   1  -2  169.58   15.50
   7   1   2  158.48   16.50
  -7   1  -2  141.69   16.50
  -8  -1  -2  126.49   15.20
   8  -1   2  131.89   14.00
   8  -1   2  130.69   13.20
  -8  -1  -2  129.69   13.70
   8   1   2  131.99   17.90
  -8   1  -2  125.69   15.00
   8   1   2   98.69   14.10
   8   1   2  138.99   17.00
  -8   1  -2  120.79   12.90
  -8   1  -2  125.19   13.50
   9  -1   2   76.49   13.30
  -9  -1  -2   83.49   14.70
  -9  -1  -2   64.49   12.10
   9  -1   2   55.19   12.40
  -9  -1  -2   70.19   14.40
  -9   1  -2   72.19   13.30
  -9   1  -2   63.39   11.90
   9   1   2   72.39   13.30
  -9   1  -2   68.19   12.60
   9   1   2   65.49   13.50
  10  -1   2   33.70   12.70
 -10  -1  -2   27.80   12.10
 -10  -1  -2   38.70   20.00
 -10  -1  -2   30.30   14.50
 -10   1  -2    8.20   12.60
 -10   1  -2    1.40   17.30
 -10   1  -2   21.60   11.40
  10   1   2   24.70   13.50
  10   1   2   39.40   13.50
 -11  -1  -2   36.00   16.30
 -11  -1  -2   39.20   13.60
 -11  -1  -2   42.80   15.90
  11  -1   2   36.60   14.20
  11  -1   2   39.10   14.20
 -11   1  -2   34.10   13.00
  11   1   2   56.39   15.80
  11   1   2   12.20   14.10
 -11   1  -2   31.50   13.60
 -11   1  -2   38.80   14.60
 -12  -1  -2   96.69   15.40
 -12  -1  -2   77.89   17.60
 -12  -1  -2   64.79   17.10
  12  -1   2   50.99   16.20
  12  -1   2   64.69   20.50
 -12   1  -2   56.69   25.70
 -12   1  -2   64.19   22.80
 -12   1  -2   84.09   15.90
  12   1   2   75.89   17.40
  12   1   2   94.69   18.30
 -13  -1  -2  150.88   20.60
 -13  -1  -2  193.28   22.40
  13  -1   2  162.88   21.70
  13  -1   2  168.68   21.60
 -13   1  -2  148.99   19.20
 -13   1  -2  136.19   17.60
  13   1   2  213.98   26.40
 -13   1  -2  147.89   21.50
 -14  -1  -2   18.90   15.70
 -14  -1  -2  -24.50   16.20
 -14  -1  -2   10.80   18.50
  14  -1   2  -11.60   15.90
  14  -1   2    3.70   17.40
  14   1   2   -5.40   17.90
  14   1   2    8.30   17.40
 -14   1  -2   14.70   14.30
 -14   1  -2  -21.20   15.30
 -14   1  -2   25.90   18.70
 -15  -1  -2   49.80   24.70
 -15  -1  -2   32.80   19.10
  15  -1   2   64.49   20.50
  15  -1   2   63.79   18.60
 -15  -1  -2   46.50   17.30
 -15   1  -2   37.00   15.10
  15   1   2   50.89   21.00
 -15   1  -2   31.70   17.20
  15   1   2   46.50   21.60
 -15   1  -2   29.20   19.30
 -16  -2   2   43.80   19.70
  16  -2  -2   75.39   17.10
 -16  -2   2   12.80   16.40
 -16   2   2   96.69   20.20
  16   2  -2   40.80   19.70
  16   2  -2   31.60   20.70
 -16   2   2   35.70   16.10
 -15  -2   2   35.70   15.70
 -15  -2   2   17.40   23.30
 -15  -2   2   57.69   37.80
  15  -2  -2   23.60   16.30
  15  -2  -2   30.40   18.90
  15   2  -2   25.00   32.30
 -15   2   2   70.99   19.00
 -15   2   2   16.80   14.90
  15   2  -2   32.90   19.50
 -15   2   2   39.20   15.00
 -14  -2   2    5.30   16.00
  14  -2  -2   17.40   15.30
 -14  -2   2   11.30   16.50
  14  -2  -2   -4.50   14.10
 -14  -2   2   25.50   17.50
 -14   2   2   14.60   26.50
 -14   2   2   16.70   13.90
  14   2  -2   29.70   19.60
  14   2  -2  -18.50   16.30
  14   2  -2   29.30   17.50
 -14   2   2   15.90   12.40
  13  -2  -2    8.20   13.90
 -13  -2   2  -17.00   16.00
  13  -2  -2   13.00   15.20
  13  -2  -2    0.50   13.40
 -13  -2   2   16.10   16.00
 -13  -2   2   12.40   14.70
  13   2  -2   42.60   19.40
 -13   2   2   16.10   13.20
  13   2  -2    1.60   15.80
 -13   2   2    3.00   14.10
 -13   2   2   12.90   11.80
  13   2  -2   34.30   17.20
  12  -2  -2  266.27   23.10
 -12  -2   2  221.38   25.00
 -12  -2   2  227.68   26.30
  12  -2  -2  187.08   22.20
 -12  -2   2  241.28   23.30
  12  -2  -2  290.37   22.80
 -12   2   2  233.48   21.70
  12   2  -2  279.57   25.40
 -12   2   2  251.27   22.80
  12   2  -2  246.28   27.80
 -12   2   2  245.48   20.40
  12   2  -2  241.78   25.90
  11  -2  -2  217.18   22.40
  11  -2  -2  273.07   22.60
 -11  -2   2  263.17   24.60
 -11  -2   2  231.18   22.10
  11  -2  -2  265.17   20.60
 -11  -2   2  242.68   26.00
 -11   2   2  231.28   18.90
 -11   2   2  211.68   25.10
  11   2  -2  250.67   24.20
 -11   2   2  235.08   21.50
  11   2  -2  251.87   24.30
  11   2  -2  223.68   26.00
  10  -2  -2  165.88   17.50
  10  -2  -2  220.48   19.50
  10  -2  -2  157.68   17.80
 -10  -2   2  154.08   19.20
 -10  -2   2  206.28   21.90
 -10   2   2  181.58   18.80
  10   2  -2  182.78   21.30
 -10   2   2  160.18   16.00
 -10   2   2  193.48   18.00
  10   2  -2  264.57   24.40
  10   2  -2  234.58   21.40
   9  -2  -2  214.58   16.10
  -9  -2   2  206.38   18.50
   9  -2  -2  214.58   17.70
  -9  -2   2  183.68   20.30
   9  -2  -2  184.88   16.70
  -9  -2   2  192.58   21.00
   9   2  -2  201.18   19.50
   9   2  -2  160.48   20.00
  -9   2   2  175.78   15.40
   9   2  -2  197.88   23.10
  -9   2   2  174.68   16.30
  -9   2   2  181.78   17.20
   8  -2  -2  633.84   31.90
   8  -2  -2  637.74   32.90
  -8  -2   2  616.74   33.80
  -8  -2   2  630.34   35.00
   8  -2  -2  595.14   32.40
  -8  -2   2  604.84   35.80
  -8   2   2  597.34   31.80
  -8   2   2  624.44   32.10
   8   2  -2  616.24   34.40
   8   2  -2  590.74   36.50
  -8   2   2  538.75   32.80
   8   2  -2  557.14   34.80
  -7  -2   2  279.07   19.80
   7  -2  -2  308.57   17.30
   7  -2  -2  304.27   18.50
  -7  -2   2  295.07   21.10
   7  -2  -2  270.07   17.90
  -7  -2   2  271.77   22.10
   7   2  -2  280.77   20.60
   7   2  -2  278.17   21.50
  -7   2   2  283.67   25.30
  -7   2   2  281.97   17.80
   7   2  -2  269.47   22.90
  -7   2   2  275.57   17.50
  -6  -2   2  777.32   41.80
  -6  -2   2  840.92   43.00
  -6  -2   2  792.92   41.10
   6  -2  -2  806.32   39.70
   6  -2  -2  857.91   39.20
   6  -2  -2  777.32   39.40
   6   2  -2  775.12   43.20
  -6   2   2  667.83   39.60
   6   2  -2  764.82   41.90
  -6   2   2  810.72   39.30
   6   2  -2  790.52   41.50
  -6   2   2  777.92   39.40
   5  -2  -2 1210.18   60.09
  -5  -2   2 1319.07   62.99
  -5  -2   2 1263.07   62.19
  -5  -2   2 1249.88   61.59
   5  -2  -2 1284.27   59.99
   5  -2  -2 1202.98   59.99
   5   2  -2 1251.47   63.09
  -5   2   2 1225.68   59.99
  -5   2   2 1194.88   60.09
   5   2  -2 1199.08   62.89
   5   2  -2 1191.88   62.19
  -4  -2   2 2104.09   96.99
   4  -2  -2 1994.70   94.99
   4  -2  -2 1859.21   94.89
   4  -2  -2 1935.41   94.69
  -4  -2   2 2034.70   96.69
  -4  -2   2 2127.39   96.39
  -4   2   2 1855.81   94.89
   4   2  -2 1975.60   96.99
   4   2  -2 1965.00   96.59
  -4   2   2 1943.51   94.99
  -3  -2   2  255.37   19.30
  -3  -2   2  290.77   18.40
   3  -2  -2  232.48   15.00
  -3  -2   2  301.27   18.70
   3   2  -2  266.17   19.10
   3   2  -2  281.17   19.30
  -3   2   2  236.68   15.00
   3   2  -2  302.77   23.90
   2  -2  -2 1355.26   65.19
   2  -2  -2 1339.47   65.09
  -2  -2   2 1349.47   66.69
  -2  -2   2 1306.57   65.99
   2   2  -2 1418.76   66.49
  -2   2   2 1291.87   64.99
  -2   2   2 1356.46   65.09
  -1  -2   2 8826.12  434.16
  -1  -2   2 9144.58  434.56
  -1  -2   2 9128.09  434.46
   1  -2  -2 8956.70  433.96
   1   2  -2 9031.80  434.46
   1   2  -2 9332.97  435.16
  -1   2   2 9421.36  433.96
   0  -2  -2 8108.19  395.06
   0  -2  -2 8012.30  394.96
   0  -2   2 8178.98  395.26
   0  -2   2 8309.07  395.26
   0   2  -2 8753.72  394.96
   0   2   2 8333.37  395.06
   0   2   2 8416.66  394.96
   0   2  -2 8255.77  395.26
  -1  -2  -2 1361.96   70.99
   1  -2   2 1506.45   71.29
  -1  -2  -2 1441.26   71.49
  -1  -2  -2 1502.35   71.69
   1  -2   2 1508.05   71.29
  -1   2  -2 1501.95   71.49
   1   2   2 1464.05   71.29
  -1   2  -2 1413.16   71.09
   1   2   2 1504.75   71.19
  -1   2  -2 1381.16   70.29
  -2  -2  -2  399.86   24.00
  -2  -2  -2  386.16   22.60
   2  -2   2  379.16   22.30
   2  -2   2  385.06   22.10
  -2  -2  -2  399.36   23.80
  -2   2  -2  385.26   22.80
   2   2   2  403.46   23.40
  -2   2  -2  374.66   22.20
   2   2   2  402.96   23.00
   3  -2   2 1022.60   51.99
  -3  -2  -2 1142.79   53.89
  -3  -2  -2 1021.50   52.39
   3  -2   2 1044.60   51.99
  -3  -2  -2 1086.09   53.19
   3   2   2 1098.99   52.69
   3   2   2  975.30   54.09
  -3   2  -2 1013.90   52.19
  -3   2  -2  994.20   51.79
  -4  -2  -2  244.28   20.60
   4  -2   2  285.37   17.60
  -4  -2  -2  286.27   20.10
   4  -2   2  278.87   17.90
  -4  -2  -2  258.97   18.60
  -4   2  -2  274.67   17.50
  -4   2  -2  291.67   18.50
   4   2   2  283.07   19.20
  -4   2  -2  213.08   16.00
   4   2   2  257.47   19.70
  -5  -2  -2  795.12   39.90
  -5  -2  -2  690.53   38.70
  -5  -2  -2  751.52   40.80
   5  -2   2  718.73   38.10
   5  -2   2  752.02   38.10
   5   2   2  770.72   39.30
  -5   2  -2  769.42   38.50
  -5   2  -2  713.73   37.90
   5   2   2  679.13   40.40
  -5   2  -2  707.73   37.50
   5   2   2  723.53   39.50
  -6  -2  -2  251.17   20.60
   6  -2   2  243.78   18.00
   6  -2   2  268.17   17.80
  -6  -2  -2  254.07   22.00
  -6  -2  -2  233.88   18.70
   6   2   2  265.77   20.20
  -6   2  -2  246.68   17.30
  -6   2  -2  218.28   17.00
  -6   2  -2  258.37   18.60
   6   2   2  227.58   22.20
   6   2   2  263.87   19.50
   7  -2   2  120.99   14.30
  -7  -2  -2  130.39   15.20
   7  -2   2  117.09   12.00
  -7  -2  -2  110.29   15.20
  -7  -2  -2   97.99   12.80
  -7   2  -2   94.39   11.90
   7   2   2  109.89   13.80
   7   2   2   98.79   13.50
  -7   2  -2  100.39   12.20
   7   2   2  103.09   15.10
  -7   2  -2  111.09   13.60
  -8  -2  -2  197.98   18.80
   8  -2   2  216.58   18.50
   8  -2   2  216.48   18.60
  -8  -2  -2  172.58   21.20
  -8  -2  -2  196.18   22.00
   8   2   2  205.78   22.90
   8   2   2  238.38   20.20
  -8   2  -2  194.68   17.90
  -8   2  -2  208.78   17.60
  -8   2  -2  198.18   19.10
   8   2   2  184.78   20.80
   9  -2   2  742.03   49.60
  -9  -2  -2  915.31   51.69
   9  -2   2  823.22   43.10
  -9  -2  -2  777.22   44.90
  -9  -2  -2  703.03   43.20
   9   2   2  731.03   44.40
   9   2   2  761.02   44.30
   9   2   2  745.83   46.40
  -9   2  -2  800.42   42.60
  -9   2  -2  819.62   43.30
  -9   2  -2  824.82   43.20
 -10  -2  -2  165.48   20.10
 -10  -2  -2  156.18   21.70
 -10  -2  -2  177.88   23.90
  10  -2   2  210.28   20.40
  10  -2   2  180.08   20.40
 -10   2  -2  159.98   17.60
  10   2   2  219.88   22.70
 -10   2  -2  161.78   19.10
  10   2   2  178.58   23.10
 -10   2  -2  178.48   18.60
 -11  -2  -2   69.39   18.00
 -11  -2  -2   13.50   16.80
 -11  -2  -2   75.19   14.60
  11  -2   2   83.29   15.20
  11  -2   2   71.49   15.20
  11   2   2   53.29   16.00
  11   2   2   45.50   16.80
 -11   2  -2   53.29   13.50
 -11   2  -2   59.39   14.70
 -11   2  -2   45.60   14.90
  12  -2   2   -2.40   14.60
 -12  -2  -2    3.10   24.40
 -12  -2  -2   27.70   17.20
 -12  -2  -2   -0.40   14.10
  12   2   2   -3.80   16.60
 -12   2  -2    7.50   14.30
 -12   2  -2    2.10   14.10
 -12   2  -2   19.20   12.60
  12   2   2   32.40   16.50
 -13  -2  -2    4.30   16.90
 -13  -2  -2   26.40   15.60
  13  -2   2   45.30   17.00
 -13  -2  -2   29.20   18.50
  13  -2   2   31.40   16.90
 -13   2  -2   47.60   15.80
  13   2   2   20.20   18.40
 -13   2  -2   44.40   13.80
  13   2   2   39.80   18.00
 -13   2  -2   11.80   16.20
 -14  -2  -2   28.60   17.50
  14  -2   2   53.49   23.40
 -14  -2  -2   20.10   25.70
 -14  -2  -2   45.20   23.00
  14  -2   2   52.69   18.40
 -14   2  -2   84.59   20.40
 -14   2  -2   71.49   26.20
  14   2   2   68.19   19.40
  14   2   2   41.80   21.10
 -14   2  -2   42.80   17.50
 -15  -3   2   27.00   19.10
  15  -3  -2   34.30   17.60
 -15  -3   2   39.80   19.50
 -15  -3   2   20.70   18.20
  15  -3  -2   20.50   21.40
 -15   3   2   22.50   15.00
  15   3  -2   22.40   20.30
  15   3  -2   46.90   19.90
  15   3  -2   54.89   22.80
 -15   3   2   27.20   16.30
 -15   3   2   36.20   21.60
 -14  -3   2   19.00   18.30
  14  -3  -2   27.80   15.50
  14  -3  -2   34.20   15.40
 -14  -3   2   27.70   19.00
  14   3  -2   23.30   18.30
 -14   3   2   19.60   12.30
  14   3  -2   17.80   19.00
 -14   3   2    9.10   13.70
  14   3  -2   45.30   35.00
 -14   3   2   35.80   15.10
 -13  -3   2   17.00   17.30
  13  -3  -2   35.00   13.00
  13  -3  -2   25.80   14.70
 -13  -3   2   17.50   17.00
 -13  -3   2    4.20   16.10
  13   3  -2   46.70   17.80
  13   3  -2   43.20   17.70
 -13   3   2   17.70   13.10
 -13   3   2   -2.10   13.50
  13   3  -2   22.30   20.40
 -13   3   2   13.70   11.70
 -12  -3   2  157.38   29.40
  12  -3  -2  137.69   16.40
 -12  -3   2  117.69   18.80
 -12  -3   2  149.88   21.20
  12  -3  -2  158.18   18.10
  12   3  -2  127.49   19.10
 -12   3   2  128.69   15.50
  12   3  -2  115.09   20.10
  12   3  -2  141.09   23.40
 -12   3   2  130.19   15.40
 -12   3   2  114.79   15.70
 -11  -3   2  331.27   28.10
 -11  -3   2  369.76   30.70
  11  -3  -2  460.25   25.00
 -11  -3   2  373.06   31.20
  11  -3  -2  336.37   25.70
 -11   3   2  382.36   24.30
 -11   3   2  393.16   25.40
  11   3  -2  334.47   31.90
  11   3  -2  378.46   30.30
 -11   3   2  376.26   25.00
  11   3  -2  383.66   29.80
 -10  -3   2   17.40   12.60
 -10  -3   2   21.00   15.60
  10  -3  -2   35.50   11.40
 -10  -3   2   25.50   15.10
  10  -3  -2   31.90    9.50
 -10   3   2   30.90    9.90
  10   3  -2   21.60   13.90
  10   3  -2   33.40   14.80
  10   3  -2   22.30   17.30
  -9  -3   2  317.27   24.50
  -9  -3   2  285.77   26.40
   9  -3  -2  323.07   20.60
  -9  -3   2  349.37   33.40
   9  -3  -2  303.07   21.40
   9   3  -2  339.87   25.40
  -9   3   2  335.47   21.20
  -9   3   2  325.27   21.60
   9   3  -2  315.67   26.50
   9   3  -2  340.07   28.80
  -8  -3   2  263.77   24.20
  -8  -3   2  343.67   26.60
   8  -3  -2  328.17   18.80
  -8  -3   2  273.77   22.30
   8  -3  -2  258.37   19.10
   8   3  -2  280.47   24.60
  -8   3   2  289.17   19.00
   8   3  -2  283.27   25.80
  -8   3   2  289.77   19.70
   8   3  -2  319.67   23.70
   7  -3  -2  386.16   22.40
  -7  -3   2  388.36   26.90
  -7  -3   2  355.56   25.30
  -7  -3   2  455.95   28.20
   7  -3  -2  400.86   22.10
   7   3  -2  380.36   27.90
   7   3  -2  365.16   26.90
   7   3  -2  386.26   25.90
  -7   3   2  393.06   23.00
  -7   3   2  376.56   22.00
  -6  -3   2  334.67   24.00
  -6  -3   2  319.07   21.90
   6  -3  -2  321.27   18.70
  -6  -3   2  330.87   23.50
   6  -3  -2  312.77   18.60
  -6   3   2  282.07   19.60
  -6   3   2  320.67   18.50
   6   3  -2  298.07   23.30
   6   3  -2  307.97   23.90
   6   3  -2  319.07   22.30
  -5  -3   2  724.53   39.20
  -5  -3   2  698.63   38.20
  -5  -3   2  690.63   39.10
   5  -3  -2  709.43   36.00
   5   3  -2  709.23   39.10
  -5   3   2  680.53   36.00
   5   3  -2  741.23   39.70
   5   3  -2  743.73   38.60
  -4  -3   2  464.65   27.40
  -4  -3   2  461.55   26.90
  -4  -3   2  429.06   26.20
   4  -3  -2  435.16   23.80
   4   3  -2  449.36   26.50
  -4   3   2  401.66   23.50
   4   3  -2  483.55   27.70
   4   3  -2  438.46   27.30
   3  -3  -2  178.68   14.20
   3  -3  -2  207.38   13.60
  -3  -3   2  167.78   17.70
  -3  -3   2  170.38   15.60
   3   3  -2  186.98   17.30
   3   3  -2  202.18   16.80
  -3   3   2  236.68   13.90
  -2  -3   2 1868.41   90.99
   2  -3  -2 1824.42   89.89
  -2  -3   2 1867.31   90.39
   2  -3  -2 1748.82   88.89
  -2  -3   2 1948.21   91.39
   2  -3  -2 1878.21   90.19
  -2   3   2 1881.71   89.89
   2   3  -2 1729.83   91.09
   2   3  -2 1958.40   90.89
  -2   3   2 1814.52   89.79
   2   3  -2 1903.01   90.89
  -1  -3   2  181.08   14.10
  -1  -3   2  242.88   17.70
   1  -3  -2  178.48   13.60
   1  -3  -2  223.78   16.10
   1   3  -2  223.58   16.60
  -1   3   2  238.68   15.10
   1   3  -2  234.18   15.50
   0  -3   2  280.97   29.60
   0  -3   2  371.86   22.00
   0  -3  -2  346.37   20.90
   0  -3  -2  352.86   22.00
   0   3   2  358.76   21.10
   0   3  -2  358.46   21.70
   0   3  -2  376.66   22.20
   0   3  -2  374.16   20.10
  -1  -3  -2  553.74   31.40
  -1  -3  -2  614.34   32.20
  -1  -3  -2  569.44   31.80
   1  -3   2  607.04   31.60
   1   3   2  577.94   31.90
  -1   3  -2  603.14   29.50
   1   3   2  586.64   31.40
  -1   3  -2  571.04   31.40
  -2  -3  -2   17.50    9.90
  -2  -3  -2   31.10    8.50
   2  -3   2   33.20    8.30
   2  -3   2   32.30    7.70
  -2  -3  -2   29.00    9.70
   2   3   2   35.60    9.70
  -2   3  -2   16.10    9.50
  -2   3  -2   29.10    4.80
  -2   3  -2   25.20    7.60
   2   3   2   21.90    8.60
  -3  -3  -2  723.93   39.70
   3  -3   2  766.32   39.20
  -3  -3  -2  807.42   40.50
   3  -3   2  782.62   39.30
  -3  -3  -2  767.52   41.00
  -3   3  -2  709.33   39.80
   3   3   2  770.52   39.90
   3   3   2  765.82   40.30
  -3   3  -2  704.63   38.90
  -4  -3  -2  859.21   46.20
   4  -3   2  922.21   45.70
   4  -3   2  893.41   45.60
  -4  -3  -2  920.91   47.70
  -4  -3  -2  917.31   47.10
  -4   3  -2  879.31   45.50
   4   3   2  909.51   46.90
  -4   3  -2  856.11   46.20
   4   3   2  866.11   46.40
   5  -3   2   54.29    9.30
   5  -3   2   55.39    9.60
  -5  -3  -2   64.79   12.80
  -5  -3  -2   46.10   10.50
  -5  -3  -2   40.20   12.80
  -5   3  -2   53.59    6.60
  -5   3  -2   48.80    9.00
  -5   3  -2   57.99   10.40
   5   3   2   44.70   11.50
   5   3   2   52.29   10.90
  -6  -3  -2   93.19   12.50
  -6  -3  -2  105.49   15.00
   6  -3   2   68.49   10.90
   6  -3   2  119.29   14.00
  -6  -3  -2   82.19   14.20
  -6   3  -2   89.39   12.20
   6   3   2   97.89   13.40
  -6   3  -2   79.39   10.60
   6   3   2   99.49   13.80
  -6   3  -2   68.89    9.90
   7  -3   2  132.49   16.60
  -7  -3  -2  188.28   21.20
  -7  -3  -2  125.29   17.30
   7  -3   2  166.18   16.50
  -7  -3  -2  154.08   18.10
  -7   3  -2  159.18   15.60
   7   3   2  164.08   20.10
   7   3   2  155.18   19.10
  -7   3  -2  146.29   17.90
  -8  -3  -2   88.69   15.80
   8  -3   2   49.80   11.30
  -8  -3  -2   42.70   12.40
   8  -3   2   44.40   11.80
  -8   3  -2   50.89   11.00
  -8   3  -2   75.19   13.90
   8   3   2   61.69   14.30
  -8   3  -2   39.60   10.40
   8   3   2   59.09   13.40
   9  -3   2  304.07   24.60
   9  -3   2  374.46   24.70
  -9  -3  -2  362.56   29.50
  -9  -3  -2  371.26   29.60
  -9  -3  -2  328.17   25.70
  -9   3  -2  313.77   23.60
  -9   3  -2  350.56   25.80
   9   3   2  379.06   27.90
   9   3   2  338.47   27.80
  -9   3  -2  304.67   23.00
 -10  -3  -2   51.99   16.50
 -10  -3  -2   43.80   17.90
  10  -3   2   40.60   13.00
 -10  -3  -2   46.50   14.60
  10  -3   2   33.90   13.10
 -10   3  -2   53.09   12.70
  10   3   2   50.59   15.30
 -10   3  -2   30.90   14.10
 -10   3  -2   24.60   12.10
  10   3   2   43.80   15.60
  11  -3   2   94.59   15.50
 -11  -3  -2   53.09   19.90
 -11  -3  -2   39.70   15.60
 -11   3  -2   64.59   15.40
  11   3   2   62.49   17.10
 -11   3  -2   58.09   13.40
 -11   3  -2   61.39   14.30
  11   3   2   68.19   18.40
 -12  -3  -2   46.70   19.10
  12  -3   2   50.79   15.60
  12  -3   2   63.49   15.70
 -12  -3  -2   56.99   20.20
 -12  -3  -2   74.99   25.20
 -12   3  -2  100.79   16.80
 -12   3  -2   83.39   16.40
 -12   3  -2   84.49   16.70
  12   3   2  106.29   28.10
  12   3   2   63.09   19.50
  13  -3   2   61.69   16.90
 -13  -3  -2   77.69   19.90
 -13  -3  -2   35.60   21.30
 -13  -3  -2   25.60   19.80
 -13   3  -2   48.70   16.40
  13   3   2   84.49   20.60
  13   3   2   45.40   20.40
 -13   3  -2   62.19   14.40
 -13  -4   2   38.10   24.30
  13  -4  -2   46.40   15.60
 -13  -4   2   36.10   16.80
  13  -4  -2   47.60   12.70
 -13  -4   2   63.89   25.30
  13   4  -2   43.30   19.40
  13   4  -2   38.40   20.10
 -13   4   2   41.70   13.20
 -13   4   2   56.19   14.70
  13   4  -2    4.50   18.70
 -12  -4   2   19.70   19.60
  12  -4  -2   38.40   12.30
 -12  -4   2   16.30   17.90
  12  -4  -2   23.40   13.00
 -12  -4   2   60.79   19.60
 -12   4   2   63.49   14.50
  12   4  -2   33.90   21.40
  12   4  -2   41.70   18.70
  12   4  -2   43.10   20.80
 -11  -4   2   20.10   17.20
  11  -4  -2   31.60   16.10
 -11  -4   2   22.60   18.00
 -11  -4   2   -0.70   18.90
  11   4  -2   16.80   16.70
  11   4  -2  -15.80   19.50
  11   4  -2   31.70   20.10
 -11   4   2   19.90   13.10
 -10  -4   2   26.10   16.20
 -10  -4   2   41.10   16.80
  10  -4  -2   21.40   11.00
 -10  -4   2   36.40   14.20
 -10   4   2   47.90   13.50
  10   4  -2   27.60   15.60
  10   4  -2   54.39   18.90
  10   4  -2   35.10   16.70
   9  -4  -2   58.29   11.10
  -9  -4   2   53.99   16.30
  -9  -4   2   49.60   15.90
  -9  -4   2   71.09   15.50
   9  -4  -2   71.89   12.60
  -9   4   2   73.99   12.10
   9   4  -2   64.79   15.80
   9   4  -2   66.59   16.70
   9   4  -2   84.19   16.60
   8  -4  -2  121.49   14.10
  -8  -4   2  105.89   15.90
  -8  -4   2   80.69   21.50
  -8  -4   2   97.49   17.00
   8   4  -2   88.89   16.70
   8   4  -2   94.29   16.10
  -8   4   2  124.59   13.90
  -7  -4   2  225.48   23.10
  -7  -4   2  206.28   22.70
  -7  -4   2  186.78   21.40
   7   4  -2  240.58   22.10
   7   4  -2  205.78   23.10
  -7   4   2  217.38   16.40
   7   4  -2  213.28   23.90
   6  -4  -2  334.37   22.20
  -6  -4   2  351.56   26.00
  -6  -4   2  383.86   27.40
  -6  -4   2  367.16   27.60
   6   4  -2  383.26   28.20
   6   4  -2  360.96   26.40
  -6   4   2  367.16   22.20
   6   4  -2  381.16   27.60
  -5  -4   2  589.04   34.80
  -5  -4   2  610.54   34.30
   5  -4  -2  563.84   31.10
  -5   4   2  514.35   31.10
   5   4  -2  578.74   33.80
  -5   4   2  517.35   30.60
   5   4  -2  628.54   35.10
   4  -4  -2   70.29    9.30
  -4  -4   2   86.49   13.70
  -4  -4   2   39.80   12.10
   4  -4  -2   56.99   10.00
  -4   4   2   63.09    9.20
   4   4  -2   78.39   12.90
   4   4  -2   68.89   12.30
  -4   4   2   61.69    9.80
   3  -4  -2  183.58   16.30
  -3  -4   2  151.48   16.80
  -3  -4   2  185.08   19.20
   3  -4  -2  199.48   15.60
  -3  -4   2  190.48   19.80
   3   4  -2  209.98   18.70
  -3   4   2  227.58   15.60
  -3   4   2  215.28   15.10
   3   4  -2  207.28   18.00
   3   4  -2  202.28   18.20
   2  -4  -2  592.84   31.90
   2  -4  -2  569.44   31.30
  -2  -4   2  576.84   33.60
  -2  -4   2  552.74   32.90
  -2  -4   2  550.94   31.00
   2   4  -2  586.44   31.80
   2   4  -2  583.64   32.70
  -2   4   2  579.04   31.00
   2   4  -2  547.75   32.40
   1  -4  -2  100.09   10.60
  -1  -4   2  161.78   17.20
  -1  -4   2  139.99   16.20
   1  -4  -2  149.19   15.30
  -1  -4   2  111.19   12.70
   1  -4  -2  121.99   14.90
  -1   4   2  138.19   13.70
   1   4  -2  152.58   15.90
   1   4  -2  116.79   14.40
   1   4  -2  141.99   17.10
   0  -4  -2  130.49   14.50
   0  -4  -2  195.38   16.90
   0  -4   2  160.78   16.40
   0  -4   2  169.28   17.60
   0   4   2  141.09   14.90
   0   4  -2  162.58   12.70
   0   4   2  178.48   15.30
   0   4  -2  179.08   16.90
   0   4  -2  170.08   15.70
   1  -4   2  244.98   20.30
  -1  -4  -2  223.98   18.70
   1  -4   2  289.87   19.70
  -1  -4  -2  286.57   23.70
  -1   4  -2  260.77   14.80
  -1   4  -2  274.27   19.40
  -1   4  -2  268.37   20.30
   1   4   2  280.17   19.10
  -2  -4  -2  208.88   18.80
  -2  -4  -2  175.28   17.00
  -2  -4  -2  124.79   16.90
   2  -4   2  183.58   16.40
  -2   4  -2  185.08   15.80
   2   4   2  168.18   18.00
   2   4   2  183.88   16.70
  -3  -4  -2  548.35   33.80
   3  -4   2  556.04   33.00
  -3  -4  -2  621.74   34.60
  -3  -4  -2  571.64   33.40
   3   4   2  585.24   33.20
  -3   4  -2  556.24   32.50
   3   4   2  615.74   34.10
  -4  -4  -2  883.41   50.09
  -4  -4  -2  973.10   51.39
   4  -4   2 1010.60   49.70
  -4  -4  -2  919.11   51.19
   4  -4   2  990.00   50.99
  -4   4  -2  943.51   49.10
   4   4   2  979.20   50.99
   4   4   2  920.01   50.19
  -4   4  -2  927.61   50.49
   5  -4   2  123.19   13.40
  -5  -4  -2  122.29   16.80
  -5  -4  -2  134.29   16.60
  -5  -4  -2   92.59   14.10
   5  -4   2   96.69   13.70
   5   4   2  100.79   15.10
  -5   4  -2  126.09   24.20
  -5   4  -2   96.09   12.60
   5   4   2  115.89   16.20
  -6  -4  -2  381.76   28.90
   6  -4   2  394.56   24.70
  -6  -4  -2  330.67   27.00
   6  -4   2  350.76   24.50
  -6  -4  -2  390.56   28.30
   6   4   2  357.06   26.70
   6   4   2  320.37   27.60
  -6   4  -2  366.36   26.70
  -6   4  -2  402.36   24.70
  -7  -4  -2  198.08   25.20
   7  -4   2  226.48   19.70
  -7  -4  -2  208.98   23.80
   7  -4   2  198.38   19.30
  -7  -4  -2  160.28   26.20
  -7   4  -2  209.78   18.40
   7   4   2  215.78   23.60
  -7   4  -2  218.28   21.90
   8  -4   2  124.59   15.90
  -8  -4  -2  147.79   19.70
  -8  -4  -2  169.28   22.60
  -8  -4  -2  138.99   17.10
   8  -4   2  159.78   18.30
   8   4   2  123.49   18.70
  -8   4  -2  134.59   16.40
  -8   4  -2  168.38   20.50
   8   4   2  155.58   19.10
   9  -4   2  -19.10   10.90
  -9  -4  -2    2.60   13.50
  -9  -4  -2  -13.00   15.90
  -9  -4  -2    4.10   18.60
  -9   4  -2   14.40   13.60
  -9   4  -2  -10.30    9.90
   9   4   2    8.60   15.70
   9   4   2  -29.80   15.50
 -10  -4  -2  -11.40   14.10
  10  -4   2    3.10   12.10
 -10  -4  -2  -16.80   16.30
 -10  -4  -2    5.80   19.10
  10  -4   2   -5.90   12.50
 -10   4  -2  -13.90   10.70
 -10   4  -2   -1.60   13.80
  10   4   2    4.80   16.20
  10   4   2    4.80   16.20
  11  -4   2   58.89   15.90
 -11  -4  -2   60.19   22.10
 -11  -4  -2   85.29   22.60
 -11  -4  -2   55.99   16.00
  11  -4   2   63.59   15.00
  11   4   2   71.79   20.60
  11   4   2   71.89   19.50
 -11   4  -2   85.79   16.40
 -11   4  -2   73.29   11.70
 -12  -4  -2  104.69   18.60
 -12  -4  -2   93.69   22.30
 -12  -4  -2   68.29   20.80
  12  -4   2  111.19   16.90
  12   4   2   58.19   19.40
 -12   4  -2  112.89   15.00
 -12   4  -2  133.39   18.50
  12   4   2  157.38   22.80
  11  -5  -2    3.00   13.50
 -11  -5   2  -11.00   16.00
 -11  -5   2   -8.60   19.70
 -11  -5   2  -11.50   17.70
  11   5  -2  -20.20   17.70
  11   5  -2   30.90   18.80
 -11   5   2   -5.60   12.00
  11   5  -2   -2.50   18.10
 -10  -5   2   24.20   20.00
 -10  -5   2   45.70   19.60
 -10  -5   2   13.10   16.60
  10   5  -2   66.69   22.80
  10   5  -2   48.90   20.10
  10   5  -2   30.30   18.10
   9  -5  -2   48.20   12.00
  -9  -5   2   66.19   18.30
  -9  -5   2   45.10   19.30
  -9  -5   2   47.70   16.60
   9   5  -2   26.20   17.30
   9   5  -2   75.99   19.20
   9   5  -2   68.29   17.70
  -8  -5   2   25.20   16.00
  -8  -5   2   40.30   16.50
   8  -5  -2   50.69   13.20
   8   5  -2   36.20   16.00
   8   5  -2   71.79   19.30
  -7  -5   2   61.79   17.70
  -7  -5   2   72.19   18.50
   7  -5  -2   73.39   12.10
   7  -5  -2   96.29   12.40
   7   5  -2   64.39   16.60
  -7   5   2   71.99   12.60
   7   5  -2   64.49   17.50
  -7   5   2   55.69   12.50
  -6  -5   2   16.30   14.90
  -6  -5   2   21.40   14.90
   6  -5  -2   14.80   10.50
   6  -5  -2   21.80   10.60
  -6   5   2   35.20    9.90
   6   5  -2   19.10   14.50
  -6   5   2   25.40   11.10
   6   5  -2   34.70   14.70
  -5  -5   2  195.38   22.20
   5  -5  -2  137.29   17.00
  -5  -5   2  133.09   19.80
  -5  -5   2  116.39   17.30
   5   5  -2  107.09   16.40
   5   5  -2  174.08   20.70
   5   5  -2  122.19   17.60
  -4  -5   2  825.42   52.79
   4  -5  -2 1089.09   51.59
  -4  -5   2  946.21   51.69
   4  -5  -2 1033.90   51.29
   4   5  -2  906.11   52.39
   4   5  -2  963.80   52.69
   4   5  -2  994.80   52.09
  -4   5   2  980.60   50.29
  -4   5   2  965.80   50.49
  -3  -5   2  519.75   32.70
   3  -5  -2  493.15   30.10
  -3  -5   2  566.34   33.30
   3  -5  -2  493.95   30.40
  -3  -5   2  458.95   30.20
  -3   5   2  466.35   29.00
  -3   5   2  512.25   29.70
   3   5  -2  499.05   30.40
   3   5  -2  556.74   32.00
   3   5  -2  462.05   31.30
   2  -5  -2  343.57   23.80
  -2  -5   2  345.47   26.80
  -2  -5   2  312.97   25.40
  -2  -5   2  292.07   22.20
   2  -5  -2  325.77   24.10
   2   5  -2  324.47   24.30
  -2   5   2  359.06   23.00
   2   5  -2  351.86   25.20
   2   5  -2  368.66   22.70
   1  -5  -2  173.58   18.30
  -1  -5   2  144.39   18.40
   1  -5  -2  141.99   17.80
  -1  -5   2  117.89   16.80
   1  -5  -2  131.99   11.10
   1   5  -2  117.59   14.70
  -1   5   2  176.08   17.40
   1   5  -2  160.18   18.50
   0  -5  -2  617.54   34.90
   0  -5  -2  528.55   30.80
   0  -5   2  512.65   34.80
   0  -5   2  480.45   34.30
   0  -5  -2  576.44   34.10
   0   5  -2  589.04   34.10
   0   5  -2  614.84   40.20
   0   5   2  604.94   33.10
   0   5   2  638.44   33.60
  -1  -5  -2  663.53   43.00
   1  -5   2  774.12   43.20
   1  -5   2  811.12   43.80
  -1  -5  -2  833.42   44.10
  -1  -5  -2  714.93   41.20
   1   5   2  761.52   42.50
  -1   5  -2  766.62   43.10
   1   5   2  855.31   43.60
  -1   5  -2  837.62   43.00
  -2  -5  -2   36.50   13.20
   2  -5   2   82.39   14.00
  -2  -5  -2   86.29   15.30
   2  -5   2  143.19   17.40
   2   5   2   74.89   13.30
  -2   5  -2  145.09   16.30
   3  -5   2  193.18   20.10
   3  -5   2  206.28   19.20
  -3  -5  -2  198.68   21.90
  -3  -5  -2  145.99   19.90
  -3   5  -2  162.58   20.10
   3   5   2  198.08   19.50
  -3   5  -2  204.68   18.70
  -4  -5  -2  106.09   15.80
  -4  -5  -2   76.79   15.50
   4  -5   2  141.49   17.40
  -4  -5  -2  146.49   18.10
   4   5   2  143.69   17.20
   4   5   2  107.29   16.10
  -4   5  -2  116.69   13.90
  -5  -5  -2  186.28   22.50
   5  -5   2  191.28   20.40
  -5  -5  -2  205.08   23.40
  -5  -5  -2  211.98   23.00
   5   5   2  193.98   23.40
  -5   5  -2  218.98   19.00
   5   5   2  250.47   23.70
  -6  -5  -2   17.90   14.70
  -6  -5  -2    6.10   15.30
  -6  -5  -2   20.10   14.10
   6   5   2    0.80   13.50
  -6   5  -2    9.00   10.20
   6   5   2   15.00   15.20
   7  -5   2   29.60   12.60
   7  -5   2   49.60   13.50
  -7  -5  -2   30.00   15.80
  -7  -5  -2   63.79   18.30
  -7  -5  -2   45.60   19.70
   7   5   2   46.00   16.80
   7   5   2   26.30   14.50
  -7   5  -2   40.20   13.30
   8  -5   2   49.20   13.30
   8  -5   2   14.50   12.70
  -8  -5  -2   12.90   17.50
  -8  -5  -2    4.70   16.90
   8   5   2   22.90   17.00
   8   5   2   39.20   17.70
  -8   5  -2   22.30   16.30
   9  -5   2   38.80   13.70
  -9  -5  -2   21.60   18.40
  -9  -5  -2   33.40   15.70
  -9  -5  -2   54.29   22.80
  -9   5  -2   59.79   24.80
   9   5   2   26.20   16.20
   9   5   2   56.49   19.10
 -10  -5  -2   18.40   22.40
  10  -5   2   25.20   13.80
 -10  -5  -2   25.20   16.50
 -10  -5  -2   25.80   18.20
 -10   5  -2    3.10   16.60
  10   5   2   12.90   18.40
  10   5   2   44.60   19.50
  -7  -6   2   91.99   18.10
  -7  -6   2  120.99   20.10
   7  -6  -2  108.39   15.30
   7   6  -2   75.39   18.30
  -7   6   2   65.09   15.30
  -7   6   2   83.39   16.40
   7   6  -2   94.39   17.00
  -6  -6   2    4.10   15.90
  -6  -6   2    0.90   14.40
   6  -6  -2   12.70   11.90
  -6  -6   2    3.50   18.60
   6  -6  -2    7.90   11.70
  -6   6   2   16.30   10.60
   6   6  -2    7.00   14.00
   6   6  -2   42.00   16.60
  -5  -6   2   27.80   14.00
   5  -6  -2   30.60   13.60
   5  -6  -2   -0.60   10.70
  -5  -6   2    2.70   15.20
  -5  -6   2   14.30   15.40
   5   6  -2    4.10   15.60
  -5   6   2   24.80   13.70
   5   6  -2   21.00   14.10
  -4  -6   2   71.29   16.90
  -4  -6   2   99.19   20.20
   4  -6  -2   74.09   14.80
   4  -6  -2   69.89   14.70
  -4  -6   2   81.09   14.50
   4   6  -2   51.39   14.80
   4   6  -2   69.69   16.10
  -4   6   2   66.19   14.10
  -4   6   2   82.19   12.10
   3  -6  -2  129.89   16.30
  -3  -6   2  123.79   19.20
  -3  -6   2  117.09   16.30
   3  -6  -2  122.69   16.40
  -3  -6   2  107.99   17.80
   3   6  -2  113.89   17.60
   3   6  -2  112.59   15.70
  -3   6   2  116.69   15.90
  -3   6   2  141.69   17.50
   2  -6  -2  151.78   19.90
   2  -6  -2  192.28   23.00
  -2  -6   2  193.58   23.00
  -2  -6   2  155.28   19.00
  -2   6   2  159.78   20.20
   2   6  -2  146.59   17.60
   2   6  -2  171.58   21.60
   1  -6  -2  111.59   16.40
  -1  -6   2  115.29   16.60
   1  -6  -2  114.69   15.50
  -1  -6   2  130.09   18.10
  -1   6   2  110.39   15.10
   1   6  -2  134.59   17.40
   1   6  -2   93.39   15.50
   0  -6   2  239.68   23.60
   0  -6  -2  198.98   22.80
   0  -6  -2  229.08   18.60
   0  -6  -2  176.98   21.90
   0  -6   2  202.58   22.20
   0   6  -2  181.58   22.00
   0   6   2  207.58   21.30
   0   6  -2  227.08   20.80
   0   6   2  220.28   23.30
  -1  -6  -2   49.20   15.60
   1  -6   2   68.79   15.40
  -1  -6  -2   62.49   11.10
  -1  -6  -2   44.90   14.40
   1  -6   2   63.09   15.50
   1   6   2   41.90   11.80
  -1   6  -2   85.89   15.30
   1   6   2   33.90   13.40
  -2  -6  -2   -8.60   11.20
  -2  -6  -2   19.60   15.50
   2  -6   2   19.10   13.10
  -2  -6  -2   13.60   14.50
   2  -6   2   27.20   14.00
  -2   6  -2    0.70   10.90
   2   6   2   -2.40   15.40
   2   6   2   -2.80   11.40
  -2   6  -2   13.40   13.60
  -3  -6  -2    7.00   15.10
   3  -6   2   16.80   13.70
  -3  -6  -2   15.70   13.30
  -3  -6  -2   41.70   16.00
   3  -6   2   40.70   14.40
  -3   6  -2   27.30   15.40
  -3   6  -2   48.00   14.20
   3   6   2   24.70   12.60
   3   6   2    8.90   13.40
  -4  -6  -2   11.10   14.70
  -4  -6  -2  -30.30   12.40
   4  -6   2   24.80   13.70
   4   6   2    0.00   15.30
  -4   6  -2    8.30   13.50
  -5  -6  -2   16.70   17.40
  -5  -6  -2   -0.90   14.30
   5  -6   2   32.80   13.60
  -5   6  -2    8.00   15.40
  -5   6  -2    4.70   10.60
   6  -6   2   17.30   16.00
  -6  -6  -2    2.70   15.90
  -6  -6  -2   38.00   18.20
   6  -6   2   49.99   14.40
  -6   6  -2   17.90   10.60
   6   6   2    4.90   17.80
  -6   6  -2   43.60   15.20
 -16   0   3   -2.10   13.30
  16   0  -3   10.20   20.20
 -16   0   3    2.30   17.70
  16   0  -3   27.50   18.80
 -15   0   3   13.10   18.10
 -15   0   3    5.10   17.20
  15   0  -3    2.20   16.30
  15   0  -3   28.00   18.30
 -15   0   3   22.40   15.60
  15   0  -3   18.30   17.50
 -14   0   3   71.09   16.30
  14   0  -3   89.09   20.30
 -14   0   3   49.50   16.90
 -14   0   3   73.39   14.70
  14   0  -3   95.59   17.90
  14   0  -3   79.69   17.00
 -13   0   3   13.30   14.20
  13   0  -3    9.40   14.70
 -13   0   3    6.90   11.60
 -13   0   3   26.30   14.10
  13   0  -3   23.80   14.30
  13   0  -3   33.40   15.60
 -12   0   3  287.97   22.10
 -12   0   3  286.97   26.50
  12   0  -3  299.67   24.30
  12   0  -3  275.37   26.60
 -12   0   3  316.47   26.00
  12   0  -3  334.77   25.50
  11   0  -3  136.69   15.10
  11   0  -3   87.29   14.30
 -11   0   3  102.99   14.80
 -11   0   3  121.39   13.50
 -11   0   3  123.99   14.80
  11   0  -3   87.19   15.70
  10   0  -3 1229.48   61.19
  10   0  -3 1123.69   61.19
 -10   0   3 1248.68   62.69
  10   0  -3 1189.18   62.89
 -10   0   3 1185.88   60.39
 -10   0   3 1228.08   61.09
  -9   0   3  834.92   44.30
   9   0  -3  773.02   44.50
  -9   0   3  841.32   45.50
   9   0  -3  904.11   44.60
  -9   0   3  908.31   46.10
   9   0  -3  841.92   46.00
  -8   0   3  205.88   16.80
  -8   0   3  208.58   17.90
   8   0  -3  207.88   16.80
   8   0  -3  167.98   16.80
   8   0  -3  232.58   19.60
   7   0  -3   -5.50   10.50
  -7   0   3   -7.20    8.00
   7   0  -3  -11.20    7.90
  -7   0   3   -6.00    9.70
   7   0  -3   -3.10    7.70
   6   0  -3  546.75   32.40
  -6   0   3  596.74   30.60
   6   0  -3  561.84   30.90
  -6   0   3  586.34   32.10
   6   0  -3  600.94   30.60
   5   0  -3  999.60   50.39
  -5   0   3 1086.49   48.80
  -5   0   3  972.80   49.70
   5   0  -3  911.21   48.50
   5   0  -3  946.51   48.30
   4   0  -3  134.69   13.70
  -4   0   3   95.89   10.10
   4   0  -3   95.59    9.50
  -4   0   3   99.19   12.70
   4   0  -3  100.19   10.20
  -4   0   3   94.39    8.80
   3   0  -3  150.98   10.00
   3   0  -3  157.68   10.60
  -3   0   3  115.99   13.30
  -3   0   3  166.88   10.80
   3   0  -3  140.39   13.40
   2   0  -3 2582.74  118.79
   2   0  -3 2537.85  118.89
   2   0  -3 2351.56  119.59
   1   0  -3  254.27   14.30
   1   0  -3  270.47   14.00
  -1   0   3  263.97   14.20
  -1   0   3  247.08   14.10
   0   0   3 2351.76  111.99
   0   0  -3 2401.86  111.99
   0   0   3 2315.27  111.99
   0   0  -3 2297.17  111.99
   1   0   3   12.90    6.20
  -1   0  -3   18.70    6.00
   1   0   3   18.20    6.60
  -1   0  -3   26.40    7.10
   2   0   3    9.80    6.80
  -2   0  -3    2.90    7.50
  -2   0  -3   -3.80    6.30
   2   0   3    9.30    7.40
   3   0   3   -5.60    7.20
  -3   0  -3    6.30    8.10
   3   0   3   10.90    9.70
  -3   0  -3    9.20    7.20
  -4   0  -3  951.10   45.00
   4   0   3  879.61   44.80
  -4   0  -3  834.12   45.00
   4   0   3  873.51   45.20
  -4   0  -3  853.41   45.70
   5   0   3    5.90    8.50
   5   0   3   -9.00    9.20
  -5   0  -3    3.20    9.00
  -5   0  -3   -3.90    9.20
  -5   0  -3   10.30    8.90
  -6   0  -3  272.97   19.90
  -6   0  -3  229.58   19.40
  -6   0  -3  249.08   20.20
   6   0   3  265.07   22.00
   6   0   3  242.18   19.50
  -7   0  -3   18.60   10.40
  -7   0  -3   10.70   10.40
   7   0   3   10.40   10.40
  -7   0  -3   14.70    9.20
   7   0   3   10.90    9.70
  -8   0  -3  489.85   30.50
  -8   0  -3  459.85   29.20
   8   0   3  466.35   29.70
   8   0   3  481.25   29.30
  -8   0  -3  492.95   29.00
  -9   0  -3  232.68   22.20
   9   0   3  241.18   21.90
  -9   0  -3  198.18   21.50
   9   0   3  264.57   21.40
  -9   0  -3  238.68   20.60
  10   0   3    2.60   19.40
  10   0   3  -19.50   12.40
 -10   0  -3    2.80   19.00
 -10   0  -3    2.70   11.60
 -10   0  -3   22.40   13.50
 -11   0  -3  218.88   24.50
 -11   0  -3  217.98   25.00
  11   0   3  254.07   24.40
 -11   0  -3  268.47   22.90
  11   0   3  241.38   24.90
 -12   0  -3   74.79   17.20
 -12   0  -3   65.89   15.10
  12   0   3   82.09   17.30
  12   0   3   96.09   17.30
 -12   0  -3   53.89   16.90
 -13   0  -3  -15.50   16.30
 -13   0  -3   -8.00   15.40
  13   0   3   26.50   17.50
 -13   0  -3    3.70   13.70
  13   0   3    1.30   16.40
  14   0   3   -7.60   17.20
 -14   0  -3   -3.60   15.40
  14   0   3   -8.50   17.10
 -14   0  -3   11.70   17.50
 -14   0  -3  -22.90   16.10
 -15   0  -3    5.10   15.50
  15   0   3   18.20   19.90
  15   0   3    4.80   18.70
 -15   0  -3   42.70   25.70
 -15   0  -3   22.60   17.50
 -16  -1   3    3.20   22.80
 -16  -1   3  -26.10   21.70
 -16  -1   3    2.50   15.50
  16  -1  -3   -9.80   17.00
  16  -1  -3   14.00   19.10
  16   1  -3    1.00   19.20
  16   1  -3   26.80   24.60
 -16   1   3  -18.40   20.50
  16   1  -3   -1.50   20.70
 -15  -1   3  136.49   20.40
  15  -1  -3  163.58   22.80
 -15  -1   3   65.19   19.10
 -15  -1   3   96.59   18.90
  15  -1  -3  140.59   19.70
  15  -1  -3  135.09   19.20
  15   1  -3  145.09   32.10
 -15   1   3  104.49   19.90
  15   1  -3  127.39   23.20
  15   1  -3  119.19   21.80
 -15   1   3   87.79   17.20
 -14  -1   3   87.29   18.00
  14  -1  -3  137.59   17.60
  14  -1  -3   97.09   19.20
  14  -1  -3   98.69   19.30
 -14  -1   3  111.69   22.50
 -14  -1   3   74.79   18.70
  14   1  -3  130.79   20.00
 -14   1   3  102.29   17.90
 -14   1   3   91.29   16.00
 -14   1   3   54.59   13.20
  14   1  -3   99.89   20.00
  13  -1  -3  126.59   16.10
 -13  -1   3   65.69   16.40
  13  -1  -3  108.09   19.10
  13  -1  -3  102.89   16.40
 -13  -1   3   81.89   16.50
 -13  -1   3   87.99   16.20
 -13   1   3   76.69   14.00
 -13   1   3   86.69   15.20
  13   1  -3   80.39   16.90
  13   1  -3  103.49   18.50
  13   1  -3  108.29   17.30
 -13   1   3   94.99   17.40
 -12  -1   3    8.70   13.20
 -12  -1   3   21.70   15.30
  12  -1  -3   24.70   13.30
 -12  -1   3   25.80   12.80
  12  -1  -3   22.90   14.30
  12  -1  -3   15.40   12.50
  12   1  -3    4.00   16.80
 -12   1   3    3.00   15.80
 -12   1   3    8.60   13.70
  12   1  -3   36.20   14.20
  12   1  -3   31.10   14.00
 -12   1   3   22.10   11.20
 -11  -1   3   49.70   12.40
 -11  -1   3   44.00   13.00
  11  -1  -3   10.20   12.20
 -11  -1   3   31.80   13.90
  11  -1  -3   35.40   13.50
  11  -1  -3   35.60   11.70
  11   1  -3   13.60   13.50
 -11   1   3   29.50   12.60
 -11   1   3   21.40   11.80
 -11   1   3   19.90   10.20
  11   1  -3   31.30   21.30
  11   1  -3   31.40   12.80
  10  -1  -3  194.88   19.40
  10  -1  -3  149.09   16.20
  10  -1  -3  130.99   17.10
 -10  -1   3  151.28   16.90
 -10  -1   3  167.88   20.30
 -10  -1   3  142.49   18.60
 -10   1   3  145.49   18.00
  10   1  -3  130.29   15.20
  10   1  -3  163.08   21.10
 -10   1   3  176.98   16.70
  10   1  -3  116.39   15.30
 -10   1   3  149.59   14.50
  -9  -1   3  584.14   34.60
  -9  -1   3  669.63   36.40
  -9  -1   3  639.74   33.70
   9  -1  -3  598.54   33.00
   9  -1  -3  543.95   33.30
   9  -1  -3  617.14   35.10
   9   1  -3  545.05   34.50
   9   1  -3  586.24   34.50
  -9   1   3  682.53   35.00
  -9   1   3  645.84   33.20
  -9   1   3  622.64   32.40
   9   1  -3  600.34   36.70
   8  -1  -3  151.38   15.60
   8  -1  -3  171.88   17.50
  -8  -1   3  219.38   16.20
  -8  -1   3  201.58   18.60
   8  -1  -3  190.18   15.10
  -8  -1   3  203.48   17.80
   8   1  -3  161.78   17.40
  -8   1   3  239.38   15.50
   8   1  -3  220.78   20.50
  -8   1   3  195.88   17.10
  -8   1   3  204.28   14.10
   8   1  -3  170.68   17.00
  -7  -1   3  216.08   15.80
   7  -1  -3  212.98   14.10
  -7  -1   3  199.58   18.50
   7  -1  -3  170.18   14.70
  -7  -1   3  192.38   17.00
   7  -1  -3  182.08   16.40
  -7   1   3  204.38   14.40
   7   1  -3  181.78   16.50
   7   1  -3  176.88   18.90
   7   1  -3  171.58   17.00
  -7   1   3  215.28   13.60
  -7   1   3  177.78   16.30
  -6  -1   3 1082.19   55.29
   6  -1  -3 1144.19   52.59
  -6  -1   3 1111.59   54.19
  -6  -1   3 1159.88   53.79
   6  -1  -3 1074.39   52.89
   6  -1  -3  904.91   54.79
  -6   1   3 1099.69   52.59
   6   1  -3 1020.20   54.19
  -6   1   3 1176.28   52.59
   6   1  -3 1046.70   53.89
  -6   1   3 1058.29   53.99
   6   1  -3 1017.10   55.49
   5  -1  -3 1387.06   60.69
   5  -1  -3 1194.18   62.19
  -5  -1   3 1306.07   62.39
  -5  -1   3 1245.58   63.19
   5  -1  -3 1307.97   60.99
  -5  -1   3 1268.27   61.89
   5   1  -3 1195.38   62.09
  -5   1   3 1392.26   60.79
  -5   1   3 1252.37   61.69
   5   1  -3 1154.28   62.29
  -5   1   3 1216.98   62.09
   5   1  -3 1174.78   63.39
  -4  -1   3  791.32   38.50
   4  -1  -3  735.63   38.30
  -4  -1   3  807.32   39.20
  -4  -1   3  799.52   39.60
   4   1  -3  750.02   39.10
   4   1  -3  784.32   40.10
  -4   1   3  686.93   38.20
   4   1  -3  739.83   38.60
  -3  -1   3 1435.96   68.79
  -3  -1   3 1458.85   67.59
   3  -1  -3 1310.37   66.99
   3   1  -3 1334.27   67.09
   3   1  -3 1356.86   67.89
  -2  -1   3 1866.81   89.69
  -2  -1   3 1830.92   89.89
  -2  -1   3 1889.71   90.09
   2   1  -3 1900.21   89.69
   2   1  -3 1807.92   90.09
   1  -1  -3 1472.85   65.89
  -1  -1   3 1322.17   66.69
   1  -1  -3 1433.16   65.99
  -1  -1   3 1303.37   66.69
  -1   1   3 1518.25   65.99
   1   1  -3 1330.57   66.89
   1   1  -3 1323.07   66.59
   1   1  -3 1271.67   66.89
   0  -1   3 3468.35  173.68
   0  -1  -3 3719.33  173.38
   0  -1  -3 3851.51  173.58
   0  -1   3 3459.95  173.68
   0   1  -3 3447.76  173.68
   0   1   3 3685.73  173.48
   0   1   3 3959.40  173.48
   0   1  -3 3486.25  173.68
   1  -1   3 1978.20   99.79
  -1  -1  -3 2159.08   99.89
  -1  -1  -3 2316.17   99.99
   1  -1   3 1948.11   99.79
   1   1   3 2118.39   99.79
  -1   1  -3 1961.90   99.79
  -1   1  -3 1971.50   99.69
   1   1   3 2123.29   99.79
   2  -1   3 1166.78   61.29
  -2  -1  -3 1292.77   61.09
   2  -1   3 1218.48   60.59
  -2  -1  -3 1318.67   61.69
  -2   1  -3 1141.39   62.79
  -2   1  -3 1220.28   60.59
   2   1   3 1233.08   61.99
   2   1   3 1295.47   60.89
  -3  -1  -3  338.07   22.40
   3  -1   3  336.37   20.40
   3  -1   3  327.37   20.40
  -3  -1  -3  345.07   21.80
  -3  -1  -3  330.47   20.50
  -3   1  -3  323.27   20.50
  -3   1  -3  324.87   20.10
   3   1   3  363.06   21.40
   3   1   3  338.37   21.30
  -4  -1  -3  112.79   12.20
  -4  -1  -3   91.89   10.50
  -4  -1  -3   63.79   10.80
   4  -1   3   84.59   10.00
   4  -1   3   68.59   10.00
   4   1   3   95.19   10.90
  -4   1  -3   91.19    9.70
   4   1   3   85.09   11.10
  -4   1  -3   76.79   10.20
  -4   1  -3   79.69   10.70
  -5  -1  -3  604.94   33.00
   5  -1   3  588.24   31.90
   5  -1   3  567.14   31.90
  -5  -1  -3  595.14   32.00
  -5  -1  -3  579.04   33.40
   5   1   3  577.04   32.70
   5   1   3  584.24   32.40
  -5   1  -3  579.14   32.20
  -5   1  -3  582.84   31.70
  -5   1  -3  586.24   32.20
   6  -1   3  499.75   28.60
   6  -1   3  517.85   28.30
  -6  -1  -3  468.45   30.20
  -6  -1  -3  472.35   28.40
  -6  -1  -3  508.45   29.80
   6   1   3  513.65   29.00
   6   1   3  455.65   29.10
  -6   1  -3  517.95   28.10
  -6   1  -3  487.05   28.70
  -6   1  -3  494.75   28.50
   7  -1   3   12.90    9.90
  -7  -1  -3   -1.00   10.80
  -7  -1  -3   -5.90   10.90
  -7  -1  -3   15.40    9.20
   7  -1   3   14.80    9.60
  -7   1  -3   -1.60   10.00
  -7   1  -3    6.40    8.80
   7   1   3   -6.30   10.20
   7   1   3    9.60   10.10
  -7   1  -3    7.30    9.70
   8  -1   3   27.90   10.50
  -8  -1  -3   20.10   12.50
  -8  -1  -3    9.70   10.10
   8  -1   3   41.80   11.80
  -8  -1  -3   26.00   12.50
  -8   1  -3   16.40   11.00
   8   1   3   23.10   11.50
   8   1   3   20.30   11.80
  -8   1  -3   15.00   10.10
  -8   1  -3   27.20   11.10
  -9  -1  -3   15.90   11.40
  -9  -1  -3   26.90   13.70
   9  -1   3   26.30   12.40
   9  -1   3   22.30   14.20
  -9  -1  -3   22.10   13.80
  -9   1  -3   23.80   14.10
   9   1   3   20.40   13.10
   9   1   3   24.40   12.60
  -9   1  -3   17.60   11.90
  -9   1  -3   11.30   11.80
 -10  -1  -3   35.90   18.70
 -10  -1  -3   38.40   12.80
  10  -1   3   39.70   13.80
  10  -1   3   38.70   14.00
 -10  -1  -3   17.30   14.80
 -10   1  -3   48.40   12.40
  10   1   3   29.40   16.20
  10   1   3   19.10   13.60
 -10   1  -3   28.00   13.40
 -10   1  -3   42.20   14.30
 -11  -1  -3   12.60   15.50
  11  -1   3   16.10   14.00
 -11  -1  -3  -25.40   13.80
 -11  -1  -3   31.90   13.60
  11  -1   3   -3.50   14.00
 -11   1  -3   25.50   12.70
 -11   1  -3    7.70   13.60
 -11   1  -3   25.80   14.80
  11   1   3   -1.10   14.30
  11   1   3   -1.40   14.30
  12  -1   3  124.09   18.80
 -12  -1  -3  157.18   22.30
  12  -1   3  181.48   20.30
 -12  -1  -3  171.98   21.60
 -12  -1  -3  172.98   21.00
 -12   1  -3  167.08   18.80
  12   1   3  129.89   19.90
 -12   1  -3  140.19   18.40
 -12   1  -3  135.59   20.00
  12   1   3  165.58   20.20
 -13  -1  -3   -7.00   14.10
  13  -1   3   -1.50   15.40
 -13  -1  -3   21.50   17.30
 -13  -1  -3  -10.10   16.80
  13  -1   3    4.90   16.30
  13   1   3   -7.90   16.70
  13   1   3    5.20   19.60
 -13   1  -3    3.50   14.40
 -13   1  -3    1.00   15.50
 -13   1  -3  -14.40   16.20
 -14  -1  -3   -1.20   14.70
  14  -1   3    1.80   18.20
 -14  -1  -3   -1.10   16.60
 -14  -1  -3   13.60   19.50
  14   1   3  -16.00   17.90
 -14   1  -3   -4.60   23.30
  14   1   3   28.70   18.60
 -14   1  -3   10.10   14.30
  15  -1   3  107.29   20.60
 -15  -1  -3   82.39   21.30
 -15   1  -3   59.89   18.90
  15   1   3   81.79   24.60
 -16  -2   3   19.40   18.60
 -16  -2   3   55.19   22.30
 -16  -2   3   64.69   18.20
  16  -2  -3   88.89   18.70
  16  -2  -3  104.19   20.20
  16   2  -3   78.79   21.70
  16   2  -3  101.79   21.90
 -16   2   3   88.09   20.00
 -16   2   3   77.59   24.50
 -16   2   3   73.99   15.50
  16   2  -3   37.00   20.00
  15  -2  -3   10.40   15.50
  15  -2  -3   14.00   16.80
  15  -2  -3    5.30   16.40
 -15  -2   3    0.60   18.50
 -15  -2   3   12.70   16.00
 -15  -2   3   12.20   17.20
  15   2  -3   33.20   18.90
  15   2  -3    1.60   20.20
 -15   2   3   -4.20   13.20
 -15   2   3   -8.60   13.70
  15   2  -3    6.90   17.60
 -15   2   3   11.30   16.70
 -14  -2   3   28.00   16.70
  14  -2  -3   23.30   14.90
  14  -2  -3   20.30   16.30
 -14  -2   3   28.60   17.90
 -14  -2   3   12.80   15.50
 -14   2   3    3.20   15.70
  14   2  -3    8.10   16.70
 -14   2   3   13.40   13.20
 -14   2   3   14.60   12.20
  14   2  -3   42.10   19.50
  14   2  -3   32.90   18.00
 -13  -2   3   17.00   15.80
 -13  -2   3   12.70   14.50
  13  -2  -3   14.80   12.80
 -13  -2   3   15.50   14.70
  13  -2  -3   20.80   15.40
  13  -2  -3   21.90   13.20
 -13   2   3   18.10   12.60
 -13   2   3    9.90   12.40
 -13   2   3    9.70   13.90
  13   2  -3   54.19   19.90
  13   2  -3   14.50   15.70
  13   2  -3   10.60   15.80
 -12  -2   3  167.58   18.40
  12  -2  -3  164.08   19.10
 -12  -2   3  151.18   19.30
  12  -2  -3  166.08   20.50
 -12  -2   3  180.78   23.70
  12  -2  -3  181.48   19.00
 -12   2   3  146.89   16.20
 -12   2   3  146.29   20.00
 -12   2   3  143.09   18.40
  12   2  -3  135.49   19.70
  12   2  -3  133.49   18.00
  12   2  -3  119.29   18.30
 -11  -2   3  110.49   18.60
  11  -2  -3  143.09   18.40
  11  -2  -3  133.09   18.60
 -11  -2   3  150.18   16.40
  11  -2  -3  137.79   16.60
 -11  -2   3  150.38   18.80
 -11   2   3  139.99   15.30
  11   2  -3  133.19   17.30
 -11   2   3  123.59   13.50
  11   2  -3  149.59   17.30
  11   2  -3  129.69   19.00
 -11   2   3  114.59   15.60
 -10  -2   3  282.67   24.40
 -10  -2   3  285.67   25.30
  10  -2  -3  350.76   20.40
 -10  -2   3  318.27   22.70
  10  -2  -3  270.27   21.20
  10  -2  -3  311.97   22.60
 -10   2   3  310.37   20.50
 -10   2   3  285.77   22.10
 -10   2   3  279.17   19.70
  10   2  -3  298.77   24.70
  10   2  -3  280.17   26.90
  10   2  -3  320.27   24.00
   9  -2  -3  107.69   12.10
   9  -2  -3  112.59   14.90
  -9  -2   3   89.49   12.40
  -9  -2   3   91.89   13.80
  -9  -2   3  103.39   15.50
   9  -2  -3   86.69   11.00
   9   2  -3   92.89   14.80
  -9   2   3   75.59   11.80
   9   2  -3   81.29   13.40
   9   2  -3   73.69   13.30
  -9   2   3   97.39   11.70
  -9   2   3   89.09   10.20
  -8  -2   3  477.15   29.40
  -8  -2   3  469.65   28.40
  -8  -2   3  465.45   30.30
   8  -2  -3  526.65   27.80
   8  -2  -3  475.45   26.60
   8  -2  -3  535.85   25.80
   8   2  -3  441.16   29.50
  -8   2   3  441.96   27.60
  -8   2   3  492.15   26.10
   8   2  -3  474.35   31.60
  -8   2   3  503.25   26.00
   8   2  -3  471.15   29.30
   7  -2  -3   60.19   11.30
  -7  -2   3   41.70    9.70
   7  -2  -3   71.69    8.40
   7  -2  -3   55.59    7.80
  -7  -2   3   51.89   11.30
  -7  -2   3   31.80   11.00
   7   2  -3   15.80   10.10
  -7   2   3   52.39    7.10
   7   2  -3   27.00   11.90
   7   2  -3   37.50   15.00
  -7   2   3   54.49    7.10
  -6  -2   3   99.49   12.70
   6  -2  -3  147.79   11.50
   6  -2  -3  114.89    9.20
  -6  -2   3  103.29   12.70
  -6  -2   3  128.99   16.00
   6  -2  -3  146.79   10.40
   6   2  -3   97.19   13.60
   6   2  -3  128.09   17.90
  -6   2   3  110.39   10.10
  -6   2   3  127.39   10.10
   6   2  -3  109.49   12.70
  -5  -2   3 1181.98   57.19
   5  -2  -3 1178.28   54.59
  -5  -2   3 1113.49   59.49
  -5  -2   3 1157.38   57.59
   5  -2  -3 1126.39   55.09
   5   2  -3 1112.89   57.99
   5   2  -3 1051.69   57.09
   5   2  -3 1084.69   57.09
  -5   2   3 1126.99   54.49
   4  -2  -3  102.79    8.10
  -4  -2   3  105.19   12.30
  -4  -2   3  133.49   12.60
   4   2  -3  126.29   13.90
   4   2  -3   95.09   11.40
   4   2  -3   86.09   11.30
   3  -2  -3  925.71   46.40
  -3  -2   3  982.00   48.80
  -3  -2   3  998.30   48.50
   3  -2  -3  881.31   46.20
   3   2  -3  974.70   48.50
  -3   2   3  870.21   46.20
  -3   2   3  993.00   46.30
   3   2  -3 1011.00   48.90
  -2  -2   3 2459.15  115.79
   2  -2  -3 2267.37  114.39
  -2  -2   3 2327.37  115.39
   2   2  -3 2353.16  116.39
  -2   2   3 2484.65  114.29
   2   2  -3 2352.76  115.39
   2   2  -3 2468.85  115.59
   1  -2  -3  338.87   21.30
  -1  -2   3  390.46   22.70
   1  -2  -3  369.76   20.60
   1   2  -3  393.66   22.00
   1   2  -3  397.26   22.30
  -1   2   3  403.46   20.90
   0  -2  -3  802.82   40.50
   0  -2   3  815.32   40.70
   0  -2  -3  759.52   39.90
   0  -2   3  794.02   40.80
   0   2  -3  784.72   40.00
   0   2   3  818.02   40.10
   0   2  -3  817.62   40.60
   0   2   3  786.82   40.20
   0   2  -3  789.12   41.20
  -1  -2  -3 1364.56   66.49
   1  -2   3 1329.37   66.39
   1  -2   3 1355.56   66.29
  -1  -2  -3 1471.35   67.09
  -1  -2  -3 1315.37   66.09
   1   2   3 1330.37   66.29
  -1   2  -3 1321.07   66.29
   1   2   3 1327.77   66.19
  -1   2  -3 1326.57   66.59
   2  -2   3  385.56   22.60
   2  -2   3  384.06   22.80
  -2  -2  -3  367.86   22.80
  -2  -2  -3  411.76   24.40
  -2  -2  -3  409.66   24.20
  -2   2  -3  412.26   23.40
   2   2   3  369.66   23.40
   2   2   3  386.46   23.10
  -2   2  -3  386.06   22.50
  -3  -2  -3 1713.63   85.79
  -3  -2  -3 1855.21   86.99
   3  -2   3 1761.92   85.59
   3  -2   3 1699.83   85.49
  -3  -2  -3 1890.71   86.59
  -3   2  -3 1699.43   85.79
   3   2   3 1664.33   87.19
  -3   2  -3 1694.63   85.49
   3   2   3 1813.32   85.99
  -4  -2  -3   83.29   12.30
  -4  -2  -3   77.29   10.10
  -4  -2  -3   83.09   13.30
   4  -2   3   76.79    9.60
   4  -2   3   87.59    9.90
  -4   2  -3   72.99   10.30
   4   2   3   77.79   10.60
   4   2   3   92.69   11.30
  -4   2  -3   71.39    9.30
  -5  -2  -3  272.87   21.90
  -5  -2  -3  280.97   19.60
   5  -2   3  269.37   19.10
   5  -2   3  284.57   19.20
  -5  -2  -3  303.27   21.40
   5   2   3  267.07   20.70
  -5   2  -3  262.07   19.90
   5   2   3  275.07   20.20
  -5   2  -3  281.47   18.00
  -5   2  -3  277.37   18.50
  -6  -2  -3  204.18   19.90
   6  -2   3  216.88   17.50
  -6  -2  -3  238.28   20.90
   6  -2   3  245.68   17.60
  -6  -2  -3  212.08   18.00
  -6   2  -3  217.98   16.70
  -6   2  -3  211.68   18.10
  -6   2  -3  204.48   16.90
   6   2   3  219.18   19.40
   6   2   3  219.08   19.00
  -7  -2  -3  809.92   45.40
   7  -2   3  727.13   42.40
  -7  -2  -3  753.52   42.90
   7  -2   3  839.72   42.70
  -7  -2  -3  834.92   44.40
  -7   2  -3  798.42   42.90
  -7   2  -3  881.41   42.50
   7   2   3  763.02   43.70
  -7   2  -3  794.62   42.20
   7   2   3  801.62   43.60
   8  -2   3   75.69   12.70
  -8  -2  -3  118.29   17.50
  -8  -2  -3  102.09   16.20
  -8  -2  -3   74.39   12.60
   8  -2   3  104.89   13.00
  -8   2  -3   91.99   13.00
   8   2   3   96.69   14.80
  -8   2  -3   77.49   12.20
  -8   2  -3   83.49   13.00
   8   2   3   88.89   14.20
   9  -2   3  -16.60   11.80
  -9  -2  -3   -2.90   11.00
   9  -2   3   13.20   11.40
  -9  -2  -3   15.80   14.30
  -9  -2  -3   20.30   14.50
  -9   2  -3   12.80   12.80
  -9   2  -3   10.60   11.80
  -9   2  -3   23.60   11.40
   9   2   3   19.40   13.60
   9   2   3   -8.00   12.60
 -10  -2  -3  159.08   17.80
  10  -2   3  198.68   21.20
 -10  -2  -3  121.39   18.50
  10  -2   3  122.69   17.40
  10   2   3  197.98   22.50
 -10   2  -3  171.58   21.30
 -10   2  -3  165.68   21.00
 -10   2  -3  180.38   19.20
 -11  -2  -3  100.09   19.30
  11  -2   3   85.89   16.50
 -11  -2  -3   98.59   19.60
 -11  -2  -3  109.49   16.00
  11  -2   3  142.19   17.40
 -11   2  -3  130.19   17.10
  11   2   3   86.69   17.90
  11   2   3  114.29   18.30
 -11   2  -3  122.19   16.00
 -11   2  -3  117.39   17.10
 -12  -2  -3   38.00   18.10
  12  -2   3   37.70   17.20
  12  -2   3   21.40   15.90
 -12  -2  -3    9.00   18.20
 -12  -2  -3   27.50   15.00
 -12   2  -3   -3.20   14.90
 -12   2  -3   11.70   18.40
 -12   2  -3   17.80   15.90
  12   2   3   30.70   17.40
  12   2   3   -0.40   17.20
 -13  -2  -3   57.69   16.70
 -13  -2  -3   62.29   20.60
  13  -2   3   44.40   27.90
 -13  -2  -3   53.19   19.80
  13  -2   3   49.40   16.90
 -13   2  -3   46.70   17.70
  13   2   3   66.19   20.50
 -13   2  -3   68.09   19.80
  13   2   3   48.00   18.50
 -13   2  -3   61.59   16.90
 -14  -2  -3   27.40   21.10
  14  -2   3   11.90   17.40
  14  -2   3   13.90   18.40
 -14   2  -3    7.50   16.20
 -14   2  -3   18.00   13.70
  14   2   3   66.29   27.00
 -14   2  -3   15.00   18.00
 -15  -3   3    8.40   18.60
 -15  -3   3    4.00   17.20
  15  -3  -3  -18.40   13.10
 -15  -3   3    1.90   20.30
 -15   3   3   -0.80   14.80
  15   3  -3  -19.00   19.90
  15   3  -3    0.30   19.70
 -15   3   3   14.90   13.50
 -15   3   3    6.90   12.90
  15   3  -3   16.80   19.00
  14  -3  -3    2.80   14.20
 -14  -3   3   14.30   22.20
 -14  -3   3    0.30   18.20
  14  -3  -3    6.20   12.70
 -14  -3   3   12.40   16.80
  14   3  -3    4.50   17.60
  14   3  -3    3.30   17.90
  14   3  -3   31.80   23.70
 -14   3   3   -0.70   12.60
 -14   3   3   12.80   14.80
 -13  -3   3   32.00   15.20
 -13  -3   3   35.80   17.40
 -13  -3   3   18.60   17.20
  13  -3  -3   33.20   12.50
  13   3  -3   25.80   17.60
  13   3  -3   20.40   19.10
  13   3  -3   55.19   20.50
 -13   3   3   29.30   12.50
 -13   3   3   15.80   13.90
  12  -3  -3  103.19   15.30
 -12  -3   3   82.09   18.50
 -12  -3   3   91.09   16.40
  12  -3  -3   60.39   13.60
 -12  -3   3   90.09   20.50
  12   3  -3   94.59   19.00
 -12   3   3   97.79   14.70
  12   3  -3  105.69   21.90
 -12   3   3   97.69   13.20
  12   3  -3   52.19   18.00
 -11  -3   3   36.10   14.30
  11  -3  -3   35.70   11.30
 -11  -3   3    6.70   15.30
  11  -3  -3   34.80   12.10
 -11  -3   3   44.00   17.00
  11   3  -3   12.00   15.20
 -11   3   3   31.50   11.30
 -11   3   3   -3.60   11.50
  11   3  -3   20.10   15.50
  11   3  -3   37.20   18.40
  10  -3  -3  190.38   15.80
 -10  -3   3  172.58   21.40
 -10  -3   3  142.59   16.50
 -10  -3   3  135.29   19.90
  10   3  -3  149.88   18.40
 -10   3   3  135.39   15.20
  10   3  -3  121.39   17.90
  10   3  -3  148.99   20.50
 -10   3   3  128.29   14.10
   9  -3  -3  461.95   27.40
  -9  -3   3  456.45   30.40
  -9  -3   3  546.45   34.60
  -9  -3   3  483.85   32.30
  -9   3   3  468.75   28.00
   9   3  -3  444.56   31.30
   9   3  -3  474.75   32.40
   9   3  -3  541.25   35.10
  -9   3   3  504.85   27.40
  -8  -3   3  168.98   17.60
  -8  -3   3  144.39   16.50
   8  -3  -3  147.49   13.30
   8  -3  -3  116.69   14.60
   8  -3  -3  176.28   12.80
  -8  -3   3  152.08   20.70
  -8   3   3  159.88   14.00
   8   3  -3  185.38   22.80
   8   3  -3   91.89   15.40
  -8   3   3  135.49   13.00
   8   3  -3  125.49   15.80
   7  -3  -3  335.77   19.70
   7  -3  -3  359.76   18.90
  -7  -3   3  360.66   25.70
   7  -3  -3  348.57   19.70
  -7  -3   3  335.77   23.50
  -7  -3   3  334.37   25.20
   7   3  -3  320.27   23.80
   7   3  -3  321.57   24.80
  -7   3   3  322.87   19.50
   7   3  -3  353.66   26.20
   6  -3  -3  265.47   14.60
  -6  -3   3  277.07   21.80
  -6  -3   3  266.17   21.50
   6  -3  -3  274.07   15.90
  -6  -3   3  257.07   20.10
  -6   3   3  259.47   15.90
   6   3  -3  263.47   22.70
   6   3  -3  249.18   21.30
   6   3  -3  252.77   20.40
  -5  -3   3  185.18   17.10
   5  -3  -3  182.38   12.90
  -5  -3   3  210.88   19.00
  -5  -3   3  206.08   17.60
   5   3  -3  184.28   18.60
   5   3  -3  237.28   19.70
  -5   3   3  191.98   13.00
   5   3  -3  207.08   17.90
   4  -3  -3  687.13   33.20
  -4  -3   3  693.73   36.40
   4  -3  -3  623.34   32.70
   4  -3  -3  580.74   31.60
  -4  -3   3  677.43   35.50
   4   3  -3  686.63   35.60
   4   3  -3  680.43   36.20
  -4   3   3  597.64   32.70
  -4   3   3  653.23   32.90
  -3  -3   3  269.07   19.50
   3  -3  -3  242.98   15.60
  -3  -3   3  264.87   20.20
  -3  -3   3  246.08   17.90
   3  -3  -3  249.68   16.30
  -3   3   3  276.77   15.80
   3   3  -3  257.67   18.90
   3   3  -3  294.17   19.50
   3   3  -3  259.17   18.60
  -3   3   3  226.88   15.30
  -2  -3   3  432.76   26.40
  -2  -3   3  463.55   28.20
  -2  -3   3  503.45   27.60
   2  -3  -3  425.66   24.80
   2  -3  -3  489.35   25.80
   2  -3  -3  471.35   26.00
   2   3  -3  515.55   27.80
  -2   3   3  448.26   25.30
   2   3  -3  488.85   27.50
   2   3  -3  542.75   27.60
  -2   3   3  502.75   25.50
  -1  -3   3 1045.40   52.89
   1  -3  -3 1018.30   51.19
  -1  -3   3 1059.79   52.49
   1  -3  -3 1038.50   51.69
   1   3  -3 1052.99   52.49
   1   3  -3  976.70   53.39
  -1   3   3 1039.80   51.29
   1   3  -3 1030.70   51.79
   0  -3   3  586.44   30.60
   0  -3  -3  571.04   29.90
   0  -3  -3  501.25   30.00
   0  -3  -3  525.65   30.30
   0   3  -3  601.34   30.60
   0   3  -3  599.74   29.40
   0   3   3  538.55   30.00
   0   3   3  529.45   29.60
  -1  -3  -3  934.61   47.90
  -1  -3  -3  949.51   47.70
   1  -3   3  945.11   47.60
  -1  -3  -3  889.71   47.10
   1  -3   3  971.10   47.50
   1   3   3  958.50   47.50
   1   3   3  881.91   47.10
  -1   3  -3  895.91   47.40
  -1   3  -3  971.50   46.10
  -1   3  -3  902.71   48.00
  -2  -3  -3  869.51   47.30
   2  -3   3  939.01   47.50
  -2  -3  -3  957.20   48.60
   2  -3   3  938.91   47.30
  -2  -3  -3  990.90   48.10
   2   3   3  974.50   47.90
  -2   3  -3  914.51   45.70
  -2   3  -3  867.71   48.00
   2   3   3  927.91   47.40
  -2   3  -3  902.21   47.20
  -3  -3  -3  150.58   15.20
  -3  -3  -3  137.99   15.20
  -3  -3  -3  134.79   16.50
   3  -3   3  133.39   14.10
   3  -3   3  144.29   14.10
   3   3   3  132.59   16.00
  -3   3  -3  141.79   15.50
   3   3   3  149.88   14.90
  -3   3  -3  142.09   13.70
  -4  -3  -3  326.17   22.60
  -4  -3  -3  365.56   24.10
   4  -3   3  340.17   21.90
  -4  -3  -3  359.26   24.80
   4  -3   3  356.06   21.70
  -4   3  -3  327.67   18.90
  -4   3  -3  320.67   22.50
  -4   3  -3  338.77   21.70
   4   3   3  335.77   23.40
   4   3   3  363.56   22.70
   5  -3   3  338.27   20.90
  -5  -3  -3  320.97   23.70
  -5  -3  -3  256.37   21.50
   5  -3   3  316.07   20.90
  -5  -3  -3  314.27   24.50
  -5   3  -3  304.57   21.70
  -5   3  -3  289.47   18.00
   5   3   3  329.57   23.10
  -5   3  -3  299.27   20.40
   5   3   3  311.67   22.50
   6  -3   3  620.54   34.00
   6  -3   3  623.54   34.70
  -6  -3  -3  591.44   37.40
  -6  -3  -3  673.93   36.90
  -6  -3  -3  557.94   34.90
  -6   3  -3  637.34   37.70
   6   3   3  573.14   35.70
   6   3   3  595.74   35.30
  -6   3  -3  606.94   34.70
  -6   3  -3  597.64   34.00
   7  -3   3  179.78   17.80
  -7  -3  -3  172.38   19.10
  -7  -3  -3  140.79   18.50
  -7  -3  -3  176.28   18.70
  -7   3  -3  147.89   15.20
  -7   3  -3  153.08   16.40
   7   3   3  155.08   20.40
   7   3   3  159.38   17.50
  -7   3  -3  157.18   22.60
   8  -3   3  186.98   20.10
  -8  -3  -3  195.48   24.10
  -8  -3  -3  206.98   21.20
   8  -3   3  239.28   20.20
  -8  -3  -3  232.58   25.60
  -8   3  -3  229.48   21.60
   8   3   3  191.88   23.30
  -8   3  -3  216.58   17.50
  -8   3  -3  196.08   18.90
   8   3   3  192.78   22.50
   9  -3   3  231.98   22.30
   9  -3   3  298.77   23.20
  -9  -3  -3  252.97   28.00
  -9  -3  -3  233.38   23.40
  -9  -3  -3  281.47   28.10
   9   3   3  270.07   25.90
   9   3   3  266.37   26.60
  -9   3  -3  257.57   21.50
  -9   3  -3  263.77   20.70
  -9   3  -3  276.17   24.20
 -10  -3  -3  262.47   25.40
  10  -3   3  246.18   23.70
 -10  -3  -3  248.88   27.70
  10  -3   3  234.28   23.40
 -10  -3  -3  232.38   28.60
 -10   3  -3  231.58   20.80
  10   3   3  209.08   27.10
 -10   3  -3  247.78   24.40
  10   3   3  282.87   29.20
 -10   3  -3  268.07   23.80
 -11  -3  -3   21.10   17.20
  11  -3   3   11.70   15.20
 -11  -3  -3   21.20   17.20
 -11  -3  -3   36.60   18.80
  11  -3   3   26.80   14.50
 -11   3  -3    7.70   14.10
  11   3   3   19.10   16.60
 -11   3  -3   16.40   12.60
 -11   3  -3   26.00   14.70
  11   3   3   18.30   18.30
 -12  -3  -3    9.00   15.30
  12  -3   3    7.00   15.20
  12  -3   3  -10.00   15.10
 -12  -3  -3    1.40   17.80
 -12  -3  -3   -5.00   18.40
  12   3   3  -12.60   25.00
 -12   3  -3  -19.10   13.30
 -12   3  -3   -5.80   14.80
  12   3   3  -16.80   17.80
 -12   3  -3   14.60   12.60
 -13  -3  -3   39.20   18.30
 -13  -3  -3   38.90   19.40
  13  -3   3   83.69   17.90
  13  -3   3   54.99   17.60
 -13  -3  -3   44.50   20.50
  13   3   3   44.30   20.00
 -13   3  -3   50.39   17.80
  13   3   3   82.49   20.80
 -13   3  -3   47.10   17.40
 -13   3  -3   61.69   14.70
 -13  -4   3   -4.70   24.80
  13  -4  -3   26.50   11.50
  13  -4  -3   16.20   12.50
 -13  -4   3   18.80   21.70
 -13  -4   3   12.90   20.50
  13   4  -3   11.80   18.90
  13   4  -3    8.00   24.00
 -13   4   3   13.20   13.90
  13   4  -3   46.90   31.80
  12  -4  -3   17.30   11.00
  12  -4  -3   16.40   14.00
 -12  -4   3   -4.90   16.10
 -12  -4   3   16.60   17.20
 -12  -4   3   10.20   18.30
 -12   4   3    5.60   12.40
  12   4  -3   -3.70   19.10
 -12   4   3   17.10   13.10
  12   4  -3   14.90   20.20
  12   4  -3   -4.00   17.10
 -11  -4   3   72.59   16.20
  11  -4  -3   86.29   12.30
  11  -4  -3   83.99   13.10
 -11  -4   3   72.99   19.10
  11   4  -3  133.79   23.10
 -11   4   3   97.29   14.20
  11   4  -3   93.09   19.30
  11   4  -3   56.39   17.60
  10  -4  -3   83.29   11.60
  10  -4  -3   66.49   12.00
 -10  -4   3   90.29   18.20
 -10  -4   3   80.29   17.00
 -10  -4   3   83.39   17.60
  10   4  -3   93.59   18.10
 -10   4   3   95.59   13.30
  10   4  -3   69.19   17.40
  10   4  -3  119.99   22.10
  -9  -4   3    4.30   13.40
  -9  -4   3  -17.00   15.10
  -9  -4   3    0.60   14.70
   9  -4  -3   -2.50    8.90
   9   4  -3    3.50   16.30
   9   4  -3    8.50   14.30
  -9   4   3   -1.30    9.50
   9   4  -3  -13.00   13.90
  -8  -4   3  108.39   16.00
  -8  -4   3  105.49   19.90
  -8  -4   3   82.69   29.70
   8  -4  -3  105.09   12.60
   8   4  -3   94.19   17.60
   8   4  -3  111.89   22.10
   8   4  -3   94.39   16.30
  -7  -4   3   82.09   15.90
  -7  -4   3   89.39   14.60
   7  -4  -3   92.79   12.10
  -7  -4   3  108.59   17.00
   7   4  -3   92.79   16.00
   7   4  -3   72.69   16.00
   7   4  -3   91.59   15.30
   6  -4  -3   22.50    7.90
  -6  -4   3   34.00   13.70
  -6  -4   3    2.20   12.90
   6   4  -3   35.10   13.90
   6   4  -3    4.80   12.40
  -6   4   3   14.50    7.70
  -6   4   3   24.30    9.20
  -5  -4   3  306.37   23.80
   5  -4  -3  312.47   20.40
  -5  -4   3  337.47   25.40
   5  -4  -3  298.67   20.00
   5   4  -3  370.66   25.30
   5   4  -3  349.37   24.20
  -5   4   3  291.37   19.70
  -5   4   3  308.47   19.30
   4  -4  -3  429.66   25.10
  -4  -4   3  423.46   28.30
  -4  -4   3  404.56   27.10
  -4  -4   3  477.45   29.30
   4  -4  -3  439.06   24.90
   4   4  -3  455.65   28.00
  -4   4   3  407.66   23.90
   4   4  -3  411.46   27.30
   4   4  -3  477.95   28.70
  -4   4   3  418.26   24.50
  -3  -4   3  119.39   15.60
   3  -4  -3  139.19   14.60
   3  -4  -3  137.09   13.40
  -3  -4   3  151.48   17.20
  -3  -4   3  168.88   18.60
  -3   4   3  138.19   13.60
  -3   4   3  129.89   13.00
   3   4  -3  137.59   16.40
   3   4  -3  156.78   17.10
   3   4  -3  155.68   16.90
  -2  -4   3   12.40   10.00
  -2  -4   3    3.90    9.10
   2  -4  -3   18.90    8.60
   2  -4  -3   11.00    9.00
  -2  -4   3   13.50   11.20
  -2   4   3   21.30    8.50
   2   4  -3   17.10    9.60
   2   4  -3   -5.10   10.20
   2   4  -3   16.60    9.70
  -2   4   3   15.00    7.40
   1  -4  -3   38.50   10.00
  -1  -4   3   31.80   10.20
   1  -4  -3    7.60   11.30
  -1  -4   3   27.50   11.20
   1   4  -3   39.40   10.00
   1   4  -3   43.20   11.10
  -1   4   3   33.80    9.10
   1   4  -3   36.50    9.30
   0  -4   3  111.99   13.40
   0  -4  -3   97.39   11.40
   0  -4  -3   93.39   12.30
   0  -4   3  105.79   12.30
   0   4  -3   87.19   13.40
   0   4   3   96.39   11.20
   0   4  -3   94.39   11.60
  -1  -4  -3  135.49   14.00
  -1  -4  -3  137.69   16.40
   1  -4   3  124.79   15.60
  -1  -4  -3  119.39   15.20
   1   4   3  129.69   14.60
  -1   4  -3  123.29   15.00
  -1   4  -3  121.79   10.80
  -2  -4  -3   56.19   12.20
  -2  -4  -3   28.60   11.60
  -2   4  -3   41.80   10.30
   2   4   3   30.30   10.30
   2   4   3   23.40   11.00
   3  -4   3  858.31   45.40
   3  -4   3  900.31   45.80
  -3  -4  -3  820.92   46.70
  -3  -4  -3  847.32   45.90
  -3  -4  -3  947.31   47.20
  -3   4  -3  803.42   46.40
   3   4   3  842.72   45.80
   3   4   3  884.01   46.50
  -3   4  -3  827.42   45.10
  -4  -4  -3    3.20   12.50
   4  -4   3    7.50   10.30
  -4  -4  -3   -6.30   10.90
   4  -4   3   14.80   12.30
  -4  -4  -3  -27.20   12.20
  -4   4  -3    8.80    9.70
   4   4   3   15.10   11.30
   4   4   3   21.70   12.10
   5  -4   3  121.29   13.70
  -5  -4  -3  109.19   16.40
  -5  -4  -3   93.09   21.50
  -5  -4  -3   94.49   17.00
   5  -4   3   92.59   13.80
   5   4   3   89.29   15.40
  -5   4  -3  122.89   16.10
   5   4   3  125.59   22.80
  -5   4  -3  127.59   15.90
  -6  -4  -3   23.20   14.00
   6  -4   3   39.10   11.50
   6  -4   3   24.50   11.50
  -6  -4  -3   43.20   16.00
  -6  -4  -3   36.30   15.00
  -6   4  -3   33.70   11.00
   6   4   3   22.70   13.90
   6   4   3   27.00   15.20
  -6   4  -3   47.40   13.80
  -7  -4  -3  230.38   26.10
   7  -4   3  204.58   20.50
   7  -4   3  241.98   20.60
  -7  -4  -3  207.38   25.50
  -7  -4  -3  188.08   21.90
   7   4   3  187.88   24.00
  -7   4  -3  212.08   22.50
  -7   4  -3  239.58   21.80
   7   4   3  227.98   25.00
   8  -4   3   71.29   14.50
  -8  -4  -3   62.69   15.20
  -8  -4  -3   65.49   17.50
   8  -4   3   89.79   13.90
  -8  -4  -3   83.29   19.20
  -8   4  -3   88.69   13.00
  -8   4  -3   68.09   15.10
   8   4   3   82.79   16.90
   8   4   3   90.29   17.50
  -9  -4  -3   13.30   18.90
  -9  -4  -3   -7.70   18.50
  -9  -4  -3   39.00   15.10
   9  -4   3   25.70   13.00
   9  -4   3   53.89   13.50
   9   4   3    7.60   16.40
  -9   4  -3   52.29   14.70
   9   4   3   39.70   17.10
  -9   4  -3   31.50   11.50
  10  -4   3   43.60   14.20
  10  -4   3   27.50   13.70
 -10  -4  -3   53.89   19.50
 -10  -4  -3   15.90   17.40
 -10  -4  -3   27.00   15.00
 -10   4  -3   36.50   10.90
  10   4   3   48.80   18.00
 -10   4  -3   44.00   12.60
  10   4   3   31.70   16.40
 -10   4  -3   47.10   15.60
 -11  -4  -3   26.40   17.60
 -11  -4  -3   47.10   20.30
 -11  -4  -3   56.49   17.30
  11  -4   3   66.29   15.60
  11   4   3   70.09   20.40
 -11   4  -3   47.50   16.80
  11   4   3   48.50   19.90
 -11   4  -3   52.99   11.40
 -12  -4  -3  134.49   23.40
  12  -4   3   97.59   20.20
 -12   4  -3  108.19   18.70
  12   4   3  155.58   23.20
 -11  -5   3   -6.80   17.60
 -11  -5   3    3.30   16.80
 -11  -5   3   18.50   18.40
  11  -5  -3   -0.30   11.00
  11   5  -3    3.30   17.80
  11   5  -3   20.50   17.60
  11   5  -3   14.40   19.20
  10  -5  -3   78.19   14.30
 -10  -5   3  123.59   22.70
 -10  -5   3   91.49   19.50
 -10   5   3  139.79   15.40
  10   5  -3   83.19   19.60
  10   5  -3  110.99   22.90
  -9  -5   3  109.79   20.70
  -9  -5   3   94.79   19.10
  -9   5   3  109.19   15.00
   9   5  -3  101.29   20.10
  -9   5   3  136.39   14.90
   9   5  -3  121.09   19.70
  -8  -5   3    4.00   15.70
  -8  -5   3    6.30   16.10
   8  -5  -3   -0.80   10.10
   8  -5  -3   -1.00    9.30
   8   5  -3   -2.40   16.00
   8   5  -3   11.90   15.60
  -8   5   3    9.00   10.30
   7  -5  -3    1.70    9.30
  -7  -5   3   18.50   15.70
  -7  -5   3    5.50   14.40
   7  -5  -3    9.30   10.30
  -7   5   3    7.30    9.90
  -7   5   3  -10.50    9.90
   7   5  -3   -6.10   15.90
   7   5  -3   -4.00   14.90
   6  -5  -3   46.60   11.20
  -6  -5   3   50.89   15.80
  -6  -5   3   48.60   14.60
  -6  -5   3   24.80   18.30
   6  -5  -3   41.80   10.20
   6   5  -3   53.19   15.50
   6   5  -3   29.50   15.60
  -6   5   3   43.80   11.20
   6   5  -3   39.20   14.10
  -5  -5   3   96.69   16.80
  -5  -5   3   94.59   15.20
   5  -5  -3  104.09   12.40
   5  -5  -3  130.39   14.00
  -5  -5   3   96.69   16.90
  -5   5   3   91.19   11.20
   5   5  -3   89.29   15.40
   5   5  -3  107.89   16.30
  -5   5   3   82.89   12.80
   5   5  -3   98.49   16.70
  -4  -5   3   28.10   14.10
   4  -5  -3   39.40   10.00
  -4  -5   3   13.90   12.10
   4  -5  -3   38.50   11.90
  -4  -5   3   48.80   13.50
  -4   5   3   50.49   10.50
  -4   5   3   57.29   11.90
   4   5  -3   56.99   14.50
   4   5  -3   31.40   12.90
   4   5  -3   40.10   12.70
   3  -5  -3  384.06   24.10
   3  -5  -3  339.87   23.60
  -3  -5   3  285.27   24.10
  -3  -5   3  321.27   26.40
  -3  -5   3  381.26   27.80
  -3   5   3  384.46   24.90
   3   5  -3  314.87   26.00
   3   5  -3  381.06   25.30
  -3   5   3  362.46   22.70
   3   5  -3  369.26   25.60
   2  -5  -3  123.09   13.80
  -2  -5   3  119.69   16.70
   2  -5  -3  122.29   14.30
  -2  -5   3  155.78   19.10
   2   5  -3  115.19   15.70
  -2   5   3  116.19   14.80
   2   5  -3  128.29   15.70
   2   5  -3  105.09   14.70
  -2   5   3  117.09   13.50
   1  -5  -3  192.98   19.30
   1  -5  -3  157.48   19.50
  -1  -5   3  172.98   18.90
   1  -5  -3  192.68   18.60
  -1  -5   3  143.19   19.40
  -1   5   3  194.88   18.50
   1   5  -3  186.38   15.60
   1   5  -3  168.78   19.10
   1   5  -3  172.88   20.10
   0  -5  -3  325.57   22.90
   0  -5   3  336.47   26.40
   0  -5  -3  473.95   32.70
   0  -5  -3  396.86   26.90
   0  -5   3  362.26   27.40
   0   5  -3  364.66   21.40
   0   5  -3  424.46   26.30
   0   5   3  419.76   25.70
   0   5   3  347.37   24.70
   0   5  -3  386.76   26.80
  -1  -5  -3  630.64   37.00
  -1  -5  -3  701.33   39.20
   1  -5   3  704.63   39.30
   1  -5   3  669.63   39.50
  -1   5  -3  686.83   39.20
  -1   5  -3  660.63   42.60
   1   5   3  671.83   37.90
  -2  -5  -3   73.69   14.40
  -2  -5  -3   20.80   12.60
   2  -5   3   60.39   13.50
  -2   5  -3   98.99   13.70
   2   5   3   46.10   12.50
   3  -5   3  180.88   20.00
  -3  -5  -3  170.68   20.40
  -3  -5  -3  190.58   21.10
  -3  -5  -3  131.19   19.80
   3   5   3  182.18   20.70
  -3   5  -3  206.18   18.80
  -4  -5  -3   65.39   15.10
  -4  -5  -3   68.29   15.00
  -4  -5  -3   50.79   15.00
   4  -5   3   66.29   13.50
  -4   5  -3   66.49   12.80
   4   5   3   65.69   14.40
   4   5   3   80.59   15.70
  -5  -5  -3   22.30   15.80
  -5  -5  -3   25.40   14.00
  -5  -5  -3  -23.90   22.50
   5   5   3   32.30   15.10
   5   5   3   15.40   14.30
  -5   5  -3   22.60   11.40
   6  -5   3   55.69   13.90
   6  -5   3   51.99   13.50
  -6  -5  -3   73.79   17.40
  -6  -5  -3   30.80   15.70
  -6  -5  -3   31.50   16.50
   6   5   3   54.19   15.60
   6   5   3   87.29   17.30
  -6   5  -3   54.89   12.20
   7  -5   3   -6.60   14.20
   7  -5   3   18.50   12.70
  -7  -5  -3   -3.70   19.50
  -7  -5  -3   -4.80   17.40
   7   5   3    7.50   14.10
  -7   5  -3    7.00   10.80
  -7   5  -3    7.20   15.90
   7   5   3   28.90   16.70
  -8  -5  -3   11.60   15.00
   8  -5   3   23.80   13.70
  -8  -5  -3    4.40   16.80
   8   5   3   17.40   16.80
  -8   5  -3  -14.10   16.40
  -8   5  -3   -1.90   13.50
   8   5   3   25.90   17.20
   9  -5   3   -6.70   13.30
  -9  -5  -3   -5.00   15.00
   9  -5   3   15.00   13.60
  -9  -5  -3   -7.10   20.00
  -9  -5  -3  -13.10   19.20
   9   5   3   -2.50   17.70
   9   5   3    4.40   17.20
  -9   5  -3  -14.00   16.70
   8  -6  -3   32.40   14.50
  -8  -6   3   56.79   18.40
   7  -6  -3  106.29   14.20
  -7  -6   3  133.79   19.90
  -7  -6   3  114.39   20.40
   7  -6  -3  128.19   15.70
  -7   6   3  100.99   16.20
   7   6  -3  112.49   19.00
   7   6  -3  128.69   20.90
  -7   6   3  142.09   17.70
   7   6  -3  134.19   19.30
  -6  -6   3   80.79   19.50
   6  -6  -3   64.79   14.00
  -6  -6   3   70.99   18.30
  -6  -6   3   67.79   15.70
   6  -6  -3   49.99   13.60
   6   6  -3   47.50   15.80
  -6   6   3   46.30   13.20
   6   6  -3   60.69   16.00
   6   6  -3   55.59   18.40
   5  -6  -3   61.19   13.80
  -5  -6   3   25.10   14.20
  -5  -6   3   44.30   16.30
  -5  -6   3   62.99   17.70
   5  -6  -3   22.50   12.40
   5   6  -3   24.80   15.60
   5   6  -3   31.50   14.80
   5   6  -3   40.40   14.80
   4  -6  -3   47.00   12.80
   4  -6  -3   22.50   11.70
  -4  -6   3   26.30   17.30
  -4  -6   3   12.20   14.70
  -4  -6   3   32.00   12.80
   4   6  -3   26.90   13.70
   4   6  -3   25.30   15.00
   3  -6  -3  614.24   34.90
   3  -6  -3  530.05   32.60
  -3  -6   3  488.85   35.20
  -3   6   3  510.55   32.40
   3   6  -3  511.15   35.20
   3   6  -3  491.85   34.30
   2  -6  -3   99.49   14.80
  -2  -6   3  136.69   18.50
  -2  -6   3  104.19   17.00
   2  -6  -3   99.49   16.80
  -2   6   3  111.19   16.00
   2   6  -3   96.59   15.30
  -2   6   3  130.79   14.50
   2   6  -3  105.29   16.50
   1  -6  -3   57.09   15.00
  -1  -6   3   35.00   15.20
   1  -6  -3   45.30   13.70
  -1  -6   3   33.20   14.30
   1   6  -3   50.19   15.00
   1   6  -3   67.09   14.40
  -1   6   3   45.90   14.20
   0  -6   3   70.99   15.30
   0  -6  -3   79.79   14.90
   0  -6  -3  110.99   16.50
   0  -6   3   72.89   16.30
   0   6   3   63.79   12.10
   0   6  -3   75.29   16.10
   0   6  -3  105.29   15.00
   0   6   3   76.69   13.40
   1  -6   3  407.16   29.20
   1  -6   3  432.26   29.80
  -1  -6  -3  393.36   29.40
  -1  -6  -3  361.76   24.70
  -1  -6  -3  408.36   28.90
   1   6   3  365.46   27.20
  -1   6  -3  372.96   28.50
   1   6   3  418.06   31.70
  -1   6  -3  357.46   28.70
   2  -6   3   78.99   15.50
  -2  -6  -3   73.29   16.20
  -2  -6  -3   68.29   13.00
   2  -6   3   88.89   16.10
  -2  -6  -3   79.29   16.80
  -2   6  -3  123.79   16.60
   2   6   3   72.89   13.60
   2   6   3   54.19   14.40
  -2   6  -3  101.99   16.00
  -3  -6  -3  205.48   25.20
   3  -6   3  263.47   24.70
   3  -6   3  299.37   27.30
  -3  -6  -3  209.58   22.20
  -3   6  -3  216.98   23.50
   3   6   3  188.98   24.50
  -3   6  -3  302.27   26.70
  -4  -6  -3  -32.60   21.10
  -4  -6  -3   16.30   15.00
   4  -6   3   33.10   14.20
  -4   6  -3    5.80   11.50
   5  -6   3   21.60   13.60
   5  -6   3    7.30   14.20
  -5  -6  -3   26.70   17.90
  -5  -6  -3  -21.60   14.40
  -5   6  -3   25.10   15.00
  -5   6  -3   -1.00   10.60
   5   6   3   -9.90   15.20
  -6  -6  -3   42.30   18.00
  -6  -6  -3   54.59   18.00
   6  -6   3   53.29   17.60
  -6  -6  -3   38.20   23.30
   6   6   3   69.19   18.30
 -17   0   4    5.70   13.60
  17   0  -4   31.20   19.40
  17   0  -4   12.00   32.10
 -17   0   4  -21.80   15.70
  17   0  -4   22.20   19.20
 -17   0   4   23.10   29.50
 -16   0   4  -11.80   16.60
  16   0  -4  -32.20   17.20
  16   0  -4  -11.30   18.50
 -16   0   4    0.00   13.50
 -16   0   4  -21.00   15.10
  15   0  -4   -9.40   17.20
  15   0  -4    4.20   16.70
 -15   0   4  -12.10   16.10
 -15   0   4  -13.40   16.20
  15   0  -4  -17.50   14.80
 -14   0   4   12.60   14.80
 -14   0   4   15.10   12.80
  14   0  -4  -15.40   15.20
  14   0  -4    2.20   14.70
  14   0  -4   -5.30   17.30
 -14   0   4    6.70   15.20
  13   0  -4   64.09   15.40
  13   0  -4   26.90   14.10
 -13   0   4   45.80   15.90
  13   0  -4   34.60   17.60
 -13   0   4   44.50   14.50
 -13   0   4   32.10   14.50
  12   0  -4   91.69   16.60
  12   0  -4  120.29   15.70
  12   0  -4  115.89   16.20
 -11   0   4   20.70   12.20
 -11   0   4    7.70   11.30
  11   0  -4   24.90   11.80
  11   0  -4   22.10   13.60
  11   0  -4   21.90   11.70
 -10   0   4   31.20   10.50
  10   0  -4   34.80   10.90
  10   0  -4   32.20   10.90
   9   0  -4  223.08   18.00
  -9   0   4  214.08   18.10
  -9   0   4  243.38   19.80
   9   0  -4  216.58   18.40
   9   0  -4  272.17   21.40
   8   0  -4  594.64   35.20
   8   0  -4  589.04   33.60
  -8   0   4  661.23   33.40
  -8   0   4  653.33   35.20
   8   0  -4  630.54   33.40
   7   0  -4   26.70   11.30
  -7   0   4   20.60   10.40
   7   0  -4   25.60    8.10
  -7   0   4   33.10    8.60
   7   0  -4   35.20    8.20
  -7   0   4   41.80    7.30
  -6   0   4  744.43   36.20
   6   0  -4  717.23   39.00
  -6   0   4  721.83   36.60
   6   0  -4  727.83   36.50
  -6   0   4  711.73   38.40
   6   0  -4  688.43   36.80
   5   0  -4 1730.53   87.59
  -5   0   4 1876.81   86.09
   5   0  -4 1724.33   86.29
   5   0  -4 1752.62   86.19
  -5   0   4 1912.41   86.29
  -5   0   4 1738.53   87.49
   4   0  -4  268.67   19.90
  -4   0   4  253.27   15.30
   4   0  -4  253.37   14.90
  -4   0   4  265.17   18.40
   3   0  -4   -1.30    4.30
   3   0  -4   -6.50    8.50
  -3   0   4   -8.90    5.10
   2   0  -4 1422.16   67.09
   2   0  -4 1371.36   67.09
  -2   0   4 1388.06   67.09
   1   0  -4 3604.54  167.48
  -1   0   4 3504.95  167.48
  -1   0   4 3528.55  167.48
   1   0  -4 3404.16  167.48
   0   0  -4 1326.17   62.39
   0   0   4 1279.87   62.49
   0   0   4 1293.27   62.49
   0   0  -4 1244.68   62.49
   1   0   4   34.50    7.20
   1   0   4   45.20    7.60
  -1   0  -4   33.50    6.70
  -1   0  -4   47.10    7.80
   2   0   4  423.16   24.30
   2   0   4  432.96   24.60
  -2   0  -4  456.05   24.40
  -2   0  -4  427.76   24.90
   3   0   4 2654.33  125.89
   3   0   4 2801.12  125.99
  -3   0  -4 2280.87  128.59
  -3   0  -4 2663.43  126.89
  -4   0  -4  572.54   32.70
   4   0   4  577.44   32.90
  -4   0  -4  585.44   33.10
  -4   0  -4  622.74   32.30
   4   0   4  587.14   33.70
   5   0   4  143.49   16.50
  -5   0  -4  147.19   16.20
  -5   0  -4  137.79   16.00
  -5   0  -4  139.39   15.30
   5   0   4  133.39   15.10
   6   0   4  227.98   17.70
  -6   0  -4  201.28   18.90
  -6   0  -4  233.18   18.10
  -6   0  -4  189.98   18.50
   6   0   4  215.88   18.90
  -7   0  -4  577.14   35.50
  -7   0  -4  634.74   34.90
   7   0   4  608.74   35.70
   7   0   4  686.43   35.20
  -7   0  -4  626.34   36.10
   8   0   4  923.81   47.10
  -8   0  -4  893.31   46.80
  -8   0  -4  911.31   48.60
  -8   0  -4  823.72   47.20
   8   0   4  833.82   47.30
   9   0   4   24.30   12.80
  -9   0  -4   27.20   13.00
  -9   0  -4   11.20   11.30
  -9   0  -4   20.80   12.90
   9   0   4    7.00   12.60
  10   0   4  380.46   29.00
 -10   0  -4  388.46   27.60
 -10   0  -4  346.47   29.70
  10   0   4  441.16   28.60
  11   0   4   14.50   15.10
 -11   0  -4   15.40   13.60
  11   0   4   13.80   14.90
 -11   0  -4    4.70   15.00
 -11   0  -4    6.10   14.60
 -12   0  -4   28.50   16.70
 -12   0  -4   -4.60   13.50
  12   0   4   30.50   16.90
 -12   0  -4   31.90   16.60
  12   0   4   15.00   15.70
 -13   0  -4   15.80   16.80
 -13   0  -4   -4.40   25.20
  13   0   4   16.80   17.40
 -13   0  -4    7.10   15.20
  13   0   4   29.90   17.90
  14   0   4   19.30   18.60
 -14   0  -4   -3.80   17.60
 -14   0  -4   24.70   15.60
 -14   0  -4    9.30   28.60
  16  -1  -4   53.79   18.10
  16  -1  -4   72.69   21.80
 -16  -1   4   64.09   16.20
 -16  -1   4   51.49   19.90
 -16   1   4   41.10   24.80
 -16   1   4   54.09   16.70
  16   1  -4   72.19   20.50
  16   1  -4   33.60   19.30
 -16   1   4   27.80   15.50
  15  -1  -4   13.70   17.00
  15  -1  -4   11.70   15.70
 -15  -1   4   15.50   15.60
  15  -1  -4   26.70   15.00
 -15  -1   4   28.70   17.30
 -15  -1   4    7.00   16.00
  15   1  -4   30.50   16.90
 -15   1   4   32.70   14.00
 -15   1   4   17.80   16.80
  15   1  -4   34.00   17.90
  15   1  -4   41.50   20.20
 -15   1   4    0.60   13.70
 -14  -1   4  207.88   26.00
 -14  -1   4  171.78   21.20
 -14  -1   4  218.08   24.00
  14  -1  -4  243.38   26.20
  14  -1  -4  281.17   24.80
  14  -1  -4  272.67   23.60
  14   1  -4  241.88   29.00
  14   1  -4  252.57   26.00
 -14   1   4  250.97   21.20
 -14   1   4  209.28   23.10
 -14   1   4  230.18   25.80
  13  -1  -4  213.88   21.80
 -13  -1   4  167.98   19.30
 -13  -1   4  152.68   18.30
 -13  -1   4  211.38   25.50
  13  -1  -4  207.28   24.10
  13  -1  -4  168.28   20.80
 -13   1   4  238.38   23.50
  13   1  -4  173.58   23.10
 -13   1   4  192.48   18.80
 -13   1   4  198.98   21.10
  13   1  -4  198.68   23.60
  13   1  -4  177.68   25.70
  12  -1  -4  101.39   16.70
  12  -1  -4  141.89   15.10
  12  -1  -4  119.29   17.70
 -12  -1   4  107.09   16.00
 -12  -1   4  154.88   18.10
 -12  -1   4   91.89   17.10
  12   1  -4  111.49   16.40
 -12   1   4  132.49   19.10
  12   1  -4  142.49   17.10
 -12   1   4  109.19   16.30
  12   1  -4  103.29   18.20
 -12   1   4  119.79   15.30
 -11  -1   4   91.39   14.00
 -11  -1   4   79.79   15.10
  11  -1  -4   81.99   15.50
  11  -1  -4  108.69   13.10
  11  -1  -4   72.59   13.10
 -11  -1   4   86.79   13.40
 -11   1   4   84.99   14.50
  11   1  -4   83.69   14.20
  11   1  -4   80.79   17.80
 -11   1   4   71.59   12.60
  11   1  -4   86.59   14.10
 -11   1   4  101.09   11.60
 -10  -1   4  514.85   33.00
 -10  -1   4  479.95   29.90
 -10  -1   4  524.45   30.90
  10  -1  -4  537.65   32.00
  10  -1  -4  496.75   29.50
  10  -1  -4  605.44   29.70
  10   1  -4  474.25   31.50
  10   1  -4  529.85   31.10
 -10   1   4  499.55   31.30
 -10   1   4  521.25   29.20
  10   1  -4  458.55   33.10
 -10   1   4  521.65   28.40
  -9  -1   4 1153.18   59.29
   9  -1  -4 1328.17   58.29
  -9  -1   4 1154.28   58.99
  -9  -1   4 1193.98   61.09
   9  -1  -4 1112.89   58.29
   9  -1  -4 1162.48   59.89
  -9   1   4 1220.78   57.99
   9   1  -4 1040.60   60.89
  -9   1   4 1161.68   59.79
   9   1  -4 1105.49   59.59
  -9   1   4 1218.48   57.79
   9   1  -4 1150.68   59.19
   8  -1  -4  971.00   51.89
   8  -1  -4 1129.79   50.29
   8  -1  -4  958.60   50.39
  -8  -1   4 1035.20   51.59
  -8  -1   4 1006.40   52.99
  -8  -1   4 1013.90   51.09
   8   1  -4  927.31   53.09
  -8   1   4 1002.30   51.99
  -8   1   4 1032.60   50.09
   8   1  -4  968.90   51.39
   8   1  -4  968.30   51.79
  -8   1   4 1092.39   49.99
   7  -1  -4  302.97   21.40
  -7  -1   4  313.27   22.80
  -7  -1   4  324.17   21.40
  -7  -1   4  357.46   20.40
   7  -1  -4  378.36   18.90
   7  -1  -4  335.07   19.10
  -7   1   4  348.37   18.80
  -7   1   4  350.16   18.30
  -7   1   4  302.87   21.40
   7   1  -4  293.27   21.40
   7   1  -4  319.37   21.00
   7   1  -4  284.97   23.60
   6  -1  -4  339.17   21.20
  -6  -1   4  343.67   20.10
  -6  -1   4  347.27   21.20
   6  -1  -4  345.67   18.50
  -6  -1   4  328.27   22.30
   6   1  -4  337.07   20.80
   6   1  -4  323.17   23.40
  -6   1   4  328.47   18.00
   6   1  -4  317.37   21.30
  -6   1   4  297.57   21.00
   5  -1  -4 3679.73  179.08
  -5  -1   4 3964.80  178.68
  -5  -1   4 3759.72  179.68
  -5  -1   4 4005.50  178.88
   5   1  -4 3664.13  178.68
   5   1  -4 3664.93  179.78
   5   1  -4 3714.53  178.88
  -5   1   4 3370.26  180.48
  -4  -1   4 4108.69  199.88
   4  -1  -4 4113.09  199.28
  -4  -1   4 4425.66  199.38
   4   1  -4 4039.30  199.08
   4   1  -4 4133.89  200.08
  -3  -1   4 1608.04   77.49
  -3  -1   4 1594.74   76.59
  -3  -1   4 1582.44   77.29
   3   1  -4 1597.64   76.59
   3   1  -4 1502.35   76.49
   2  -1  -4  775.12   37.20
  -2  -1   4  762.12   38.60
  -2  -1   4  779.72   38.60
   2   1  -4  735.43   39.40
   2   1  -4  781.32   38.70
   2   1  -4  767.52   39.00
  -1  -1   4  215.38   15.30
   1  -1  -4  240.38   13.90
  -1  -1   4  220.08   14.90
  -1   1   4  250.07   13.60
   1   1  -4  199.58   15.50
   1   1  -4  215.88   14.80
   0  -1   4  271.77   17.30
   0  -1  -4  293.67   17.00
   0  -1  -4  284.37   16.30
   0  -1   4  255.97   16.90
   0   1  -4  256.07   16.70
   0   1  -4  268.27   17.60
   0   1   4  278.67   16.50
  -1  -1  -4 4501.15  214.18
  -1  -1  -4 4620.84  214.38
   1  -1   4 4611.04  215.08
   1  -1   4 4276.17  214.28
  -1   1  -4 4382.26  214.38
   1   1   4 4538.55  214.28
   1   1   4 4619.54  214.28
  -1   1  -4 4328.87  214.28
   2  -1   4 4255.57  206.38
   2  -1   4 4240.28  206.28
  -2  -1  -4 4286.97  206.28
  -2  -1  -4 4480.85  206.48
  -2   1  -4 4246.77  206.38
   2   1   4 4468.75  206.38
  -2   1  -4 4213.78  206.28
   2   1   4 4304.87  206.38
   3  -1   4 2650.14  127.59
  -3  -1  -4 2770.32  127.89
  -3  -1  -4 2609.64  127.59
  -3  -1  -4 2742.83  128.59
   3  -1   4 2641.74  127.59
   3   1   4 2615.64  127.69
  -3   1  -4 2561.94  127.49
   3   1   4 2582.04  128.79
  -3   1  -4 2614.14  127.39
  -4  -1  -4  253.77   20.80
  -4  -1  -4  292.77   20.90
  -4  -1  -4  294.57   19.50
   4  -1   4  277.97   19.20
   4  -1   4  295.07   19.30
   4   1   4  262.97   19.60
   4   1   4  290.07   20.50
  -4   1  -4  264.77   18.70
  -4   1  -4  264.27   19.40
   5  -1   4  136.29   14.70
  -5  -1  -4   95.09   12.50
  -5  -1  -4  124.69   13.30
   5  -1   4  158.78   14.80
  -5  -1  -4  125.79   14.90
   5   1   4  123.69   13.30
  -5   1  -4  107.69   14.80
  -5   1  -4  133.79   14.20
   5   1   4  141.39   15.60
  -5   1  -4  123.69   12.80
  -6  -1  -4  488.05   29.70
   6  -1   4  522.45   32.10
  -6  -1  -4  473.05   28.50
   6  -1   4  504.05   28.90
  -6  -1  -4  465.35   30.30
  -6   1  -4  496.15   28.80
   6   1   4  482.15   29.30
  -6   1  -4  483.75   28.70
  -6   1  -4  450.15   30.20
   6   1   4  496.15   29.10
   7  -1   4  900.51   48.40
   7  -1   4  875.81   47.90
  -7  -1  -4  873.31   47.60
  -7  -1  -4  890.31   49.60
  -7  -1  -4  899.71   48.60
  -7   1  -4  851.91   47.50
   7   1   4  860.51   48.50
  -7   1  -4  961.90   47.70
   7   1   4  949.40   48.50
  -7   1  -4 1013.70   48.70
  -8  -1  -4  111.89   15.90
  -8  -1  -4  106.29   14.00
   8  -1   4  122.79   14.00
  -8  -1  -4   96.09   14.90
   8  -1   4   95.79   14.20
  -8   1  -4  113.49   13.70
   8   1   4  104.69   14.40
   8   1   4  115.79   15.40
  -8   1  -4  112.79   14.50
  -8   1  -4  114.09   14.80
  -9  -1  -4   30.60   14.70
   9  -1   4   51.89   15.90
  -9  -1  -4   65.39   13.40
  -9  -1  -4   80.79   21.30
   9  -1   4   71.19   13.70
   9   1   4   37.00   13.60
   9   1   4   48.80   14.70
  -9   1  -4   55.29   13.60
  -9   1  -4   58.59   12.90
  -9   1  -4   60.69   14.30
 -10  -1  -4  104.89   15.40
 -10  -1  -4   48.50   16.30
  10  -1   4   77.39   15.10
 -10  -1  -4   81.19   26.80
  10  -1   4   64.29   15.40
 -10   1  -4   64.49   14.40
 -10   1  -4   77.19   15.50
  10   1   4   94.69   16.10
 -10   1  -4   79.39   15.40
  10   1   4   94.09   24.90
 -11  -1  -4   24.40   16.40
 -11  -1  -4    4.70   16.20
  11  -1   4   38.80   15.30
 -11  -1  -4   17.00   14.00
  11  -1   4   55.79   15.50
 -11   1  -4   41.50   13.90
 -11   1  -4   44.80   19.20
  11   1   4   43.30   16.60
  11   1   4   44.40   16.20
 -11   1  -4   35.00   14.80
 -12  -1  -4  106.29   17.30
 -12  -1  -4  106.19   29.70
 -12  -1  -4  107.09   19.50
  12  -1   4  130.79   19.10
 -12   1  -4  102.19   16.80
 -12   1  -4   94.49   19.20
  12   1   4  116.99   19.70
  12   1   4   88.29   18.70
 -12   1  -4   75.79   16.90
 -13  -1  -4   47.40   16.50
  13  -1   4   49.50   18.80
 -13  -1  -4   37.40   18.10
  13  -1   4   43.00   17.90
 -13  -1  -4   56.99   20.40
 -13   1  -4   59.19   18.60
 -13   1  -4   51.99   15.90
  13   1   4   40.20   17.80
 -13   1  -4   54.19   17.30
  13   1   4   22.70   18.10
 -14  -1  -4   26.00   29.30
  14  -1   4   69.09   19.30
 -14  -1  -4   27.40   18.00
  14  -1   4   10.70   19.10
 -14  -1  -4   26.90   25.10
 -14   1  -4   69.39   20.00
  14   1   4   63.09   20.80
 -14   1  -4   31.80   15.00
 -14   1  -4   59.69   18.10
  14   1   4   26.20   27.80
 -16  -2   4   -1.80   16.30
  16  -2  -4  -28.50   22.30
 -16  -2   4  -21.10   17.30
 -16  -2   4   -1.40   16.50
  16  -2  -4   37.00   18.10
  16   2  -4    4.00   19.30
  16   2  -4   28.00   20.60
 -16   2   4    3.20   14.00
  16   2  -4   45.70   21.00
 -16   2   4   29.60   18.00
  15  -2  -4   37.80   27.30
  15  -2  -4   36.50   18.80
  15  -2  -4   42.30   15.60
 -15  -2   4   68.29   19.00
 -15  -2   4   50.09   19.40
 -15  -2   4   47.60   17.60
 -15   2   4   27.90   16.40
 -15   2   4   30.10   13.50
  15   2  -4   60.19   19.90
  15   2  -4   20.30   17.50
  15   2  -4   41.00   18.20
  14  -2  -4  103.39   16.70
  14  -2  -4  119.39   18.60
 -14  -2   4   91.19   17.90
  14  -2  -4  132.99   19.30
 -14  -2   4  104.19   19.60
 -14  -2   4   81.99   19.10
  14   2  -4  111.59   22.00
 -14   2   4   89.49   14.20
 -14   2   4   78.59   18.30
  14   2  -4  114.49   20.70
  14   2  -4  121.49   19.80
  13  -2  -4   62.39   13.70
 -13  -2   4   15.10   15.40
  13  -2  -4   23.30   14.90
 -13  -2   4   59.39   16.20
 -13  -2   4   31.50   15.30
  13  -2  -4   74.29   15.00
 -13   2   4   57.19   12.90
  13   2  -4   53.99   16.20
 -13   2   4   36.30   15.00
  13   2  -4   37.60   16.30
  13   2  -4   50.29   19.60
 -13   2   4   47.90   12.20
 -12  -2   4   14.40   14.30
 -12  -2   4    9.80   13.30
  12  -2  -4    1.40   13.10
 -12  -2   4   25.30   15.00
  12  -2  -4   20.80   12.60
  12  -2  -4   24.40   14.30
  12   2  -4    2.20   14.70
 -12   2   4   34.20   11.40
  12   2  -4    2.10   14.30
 -12   2   4    8.80   13.10
  12   2  -4    8.70   14.30
 -12   2   4   26.80   20.00
 -11  -2   4  157.78   22.20
 -11  -2   4  187.28   19.10
  11  -2  -4  207.38   19.30
 -11  -2   4  128.79   16.60
  11  -2  -4  133.49   17.00
  11  -2  -4  157.78   19.70
  11   2  -4  136.09   17.70
 -11   2   4  160.08   15.70
 -11   2   4  151.28   14.40
  11   2  -4  164.98   20.30
 -11   2   4  134.59   18.50
  11   2  -4  144.79   21.80
  10  -2  -4   86.39   13.20
 -10  -2   4   90.99   13.50
 -10  -2   4   69.49   14.70
 -10  -2   4   87.39   14.30
  10  -2  -4  100.69   12.90
  10  -2  -4   80.59   11.40
 -10   2   4   83.59   13.30
  10   2  -4   56.69   13.70
  10   2  -4   77.99   15.70
  10   2  -4   92.89   14.30
 -10   2   4   97.09   12.50
 -10   2   4   84.19   10.00
  -9  -2   4   57.39   11.50
  -9  -2   4   65.49   12.60
   9  -2  -4   60.09    9.30
   9  -2  -4   64.39   11.70
  -9  -2   4   36.40   12.90
   9  -2  -4   71.39   11.30
  -9   2   4   50.89   11.10
   9   2  -4   31.70   11.90
  -9   2   4   57.39    8.40
  -9   2   4   40.40    8.10
   9   2  -4   46.90   18.30
   9   2  -4   60.69   15.30
  -8  -2   4  184.78   18.20
   8  -2  -4  196.58   15.60
  -8  -2   4  175.28   19.30
  -8  -2   4  181.48   19.00
   8  -2  -4  181.18   13.60
  -8   2   4  130.69   15.60
   8   2  -4  160.38   20.40
  -8   2   4  185.58   12.30
   8   2  -4  159.58   20.70
   8   2  -4  165.98   18.30
  -8   2   4  177.98   13.00
   7  -2  -4  199.88   15.10
  -7  -2   4  201.88   22.80
  -7  -2   4  177.88   18.50
  -7  -2   4  201.18   18.40
   7  -2  -4  235.18   13.50
   7   2  -4  176.48   18.20
   7   2  -4  190.48   17.60
   7   2  -4  191.88   20.00
  -6  -2   4   66.19   11.00
  -6  -2   4   51.39   11.00
   6  -2  -4   80.09   10.40
  -6  -2   4   43.20   11.20
   6   2  -4   57.89   10.20
   6   2  -4   65.29   13.30
   6   2  -4   42.00   10.40
   5  -2  -4  164.88   12.50
  -5  -2   4  148.29   15.90
  -5  -2   4  151.78   16.80
  -5  -2   4  181.68   15.50
   5   2  -4  161.08   15.70
   5   2  -4  193.68   18.50
   5   2  -4  150.68   16.30
  -4  -2   4  561.44   30.50
   4  -2  -4  456.35   27.80
  -4  -2   4  564.74   30.40
   4   2  -4  569.04   29.60
   4   2  -4  542.05   31.00
  -3  -2   4  130.79   15.20
   3  -2  -4   98.89    9.50
  -3  -2   4  121.39   14.10
  -3  -2   4  121.29   15.10
   3   2  -4  159.28   14.60
   3   2  -4  157.28   15.40
   3   2  -4  127.79   13.90
   2  -2  -4  525.95   26.70
  -2  -2   4  516.25   29.00
   2  -2  -4  484.35   27.20
  -2  -2   4  530.15   29.30
   2   2  -4  534.15   29.00
   2   2  -4  562.34   31.20
  -2   2   4  559.64   27.00
   1  -2  -4  377.86   22.50
  -1  -2   4  427.56   23.60
   1  -2  -4  387.96   21.70
  -1  -2   4  392.36   23.80
  -1   2   4  415.06   22.00
   1   2  -4  438.36   23.60
   1   2  -4  382.56   24.70
   0  -2  -4  290.07   18.70
   0  -2  -4  317.27   19.70
   0  -2   4  344.07   20.30
   0  -2   4  316.07   19.70
   0   2  -4  315.37   20.90
   0   2   4  302.17   19.00
   0   2   4  308.97   18.90
   0   2  -4  298.67   19.10
   0   2  -4  333.17   19.60
   1  -2   4  939.41   46.10
   1  -2   4  938.81   46.30
  -1  -2  -4  936.61   46.60
  -1  -2  -4  883.71   45.80
  -1   2  -4  923.71   46.10
   1   2   4  870.21   45.90
   1   2   4  894.71   46.00
  -1   2  -4  899.11   46.50
   2  -2   4  511.25   27.60
  -2  -2  -4  533.85   29.00
   2  -2   4  496.45   27.80
  -2  -2  -4  507.45   28.70
  -2  -2  -4  480.85   27.50
   2   2   4  493.95   28.10
   2   2   4  469.65   27.70
  -2   2  -4  499.05   27.30
  -2   2  -4  486.05   27.90
   3  -2   4  704.63   38.30
  -3  -2  -4  734.53   39.60
  -3  -2  -4  680.33   38.10
  -3  -2  -4  790.12   40.30
   3  -2   4  737.73   38.10
   3   2   4  774.72   44.20
  -3   2  -4  699.83   38.30
  -3   2  -4  734.33   38.10
   3   2   4  730.83   38.40
  -4  -2  -4   37.00   11.20
   4  -2   4   40.60    9.20
  -4  -2  -4   41.20    9.40
  -4  -2  -4   29.20   11.30
   4  -2   4   43.90    8.90
   4   2   4   31.30    9.40
   4   2   4   28.90    9.70
  -4   2  -4   41.60    8.70
  -4   2  -4   47.40   10.00
   5  -2   4   15.60    8.50
  -5  -2  -4    7.30   10.50
   5  -2   4   15.30    9.00
  -5  -2  -4   10.70   10.60
  -5  -2  -4   14.30    9.10
   5   2   4   19.80    9.70
   5   2   4   15.00   10.00
  -5   2  -4   26.10    8.30
  -5   2  -4   15.10    9.60
  -5   2  -4   10.00    8.30
   6  -2   4  399.66   25.60
  -6  -2  -4  398.06   25.80
  -6  -2  -4  407.66   27.40
  -6  -2  -4  404.36   28.20
   6  -2   4  426.36   25.50
   6   2   4  402.46   26.40
  -6   2  -4  412.06   26.00
   6   2   4  399.76   26.90
  -6   2  -4  407.46   24.90
  -6   2  -4  434.36   25.00
  -7  -2  -4   43.60   13.80
  -7  -2  -4   35.10   14.10
   7  -2   4   37.20   10.80
  -7  -2  -4   24.40   11.00
   7  -2   4   22.00   10.80
  -7   2  -4   43.90   11.20
   7   2   4   49.80   12.90
  -7   2  -4   48.10   11.60
   7   2   4   28.20   12.40
  -7   2  -4   34.30   11.40
  -8  -2  -4   90.09   21.40
   8  -2   4  123.79   15.10
  -8  -2  -4  123.39   17.60
  -8  -2  -4   97.69   14.50
   8  -2   4  107.29   16.40
  -8   2  -4   99.39   14.50
  -8   2  -4  111.89   14.60
   8   2   4  101.49   15.60
   8   2   4  117.69   16.30
  -8   2  -4  129.49   21.90
  -9  -2  -4   85.89   14.10
   9  -2   4  125.49   23.40
  -9  -2  -4   63.39   16.80
  -9  -2  -4  101.39   17.90
   9  -2   4   82.59   14.70
   9   2   4   93.99   15.80
   9   2   4  101.29   16.80
  -9   2  -4   88.79   14.90
  -9   2  -4   76.69   14.40
  -9   2  -4   99.29   15.10
 -10  -2  -4  142.79   17.40
 -10  -2  -4   99.09   19.10
  10  -2   4  150.68   17.40
  10  -2   4   87.69   16.90
 -10  -2  -4  121.59   20.40
  10   2   4  147.89   19.60
 -10   2  -4  129.79   16.50
  10   2   4  118.39   18.80
 -10   2  -4  125.39   17.70
 -10   2  -4  123.79   16.50
 -11  -2  -4   27.00   19.20
 -11  -2  -4   17.90   17.10
 -11  -2  -4   25.30   13.90
  11  -2   4    5.50   20.50
  11  -2   4   35.60   15.10
 -11   2  -4   24.60   13.60
  11   2   4   -7.40   15.70
  11   2   4   26.40   16.20
 -11   2  -4   34.80   15.00
 -11   2  -4   17.70   14.60
 -12  -2  -4  -11.50   16.10
 -12  -2  -4    9.80   15.10
 -12  -2  -4    9.50   18.30
  12  -2   4    0.60   15.70
  12  -2   4   30.30   16.30
  12   2   4  -11.10   17.00
 -12   2  -4   12.00   13.70
 -12   2  -4   -3.30   15.40
  12   2   4   16.80   17.80
 -12   2  -4   11.60   15.20
 -13  -2  -4  -17.00   18.60
 -13  -2  -4   12.00   16.50
  13  -2   4    3.10   16.80
 -13   2  -4   12.60   14.90
  13   2   4  -10.30   18.60
 -13   2  -4    9.50   17.30
  13   2   4   27.00   19.00
 -14  -2  -4   25.20   20.90
  14  -2   4   12.70   17.70
  14   2   4   43.60   21.40
 -14   2  -4    1.30   16.90
  15  -3  -4   -0.50   13.40
  15  -3  -4  -15.40   11.60
 -15  -3   4    8.40   18.20
 -15  -3   4   -9.50   17.60
 -15  -3   4  -11.50   19.00
  15   3  -4  -14.00   17.30
 -15   3   4   -4.60   15.30
 -15   3   4   24.70   12.80
  15   3  -4  -11.60   18.80
  15   3  -4  -23.20   17.30
 -15   3   4   -2.40   12.20
 -14  -3   4   16.90   17.00
 -14  -3   4    1.00   17.50
  14  -3  -4    5.20   12.40
 -14  -3   4  -10.50   17.00
  14  -3  -4    3.40   10.90
 -14   3   4    3.10   11.80
  14   3  -4   -4.10   17.90
  14   3  -4   21.20   18.90
  14   3  -4    3.50   17.40
 -14   3   4   11.10   13.80
  13  -3  -4  192.58   16.70
 -13  -3   4  145.19   21.40
  13  -3  -4  167.58   20.60
 -13  -3   4  145.69   22.90
  13  -3  -4  200.18   19.60
 -13  -3   4  126.49   19.80
  13   3  -4  145.49   22.00
  13   3  -4  145.99   23.70
 -13   3   4  139.79   19.90
 -13   3   4  166.38   18.90
 -13   3   4  160.08   17.70
  13   3  -4  158.08   22.00
  12  -3  -4  236.98   20.30
 -12  -3   4  181.48   22.20
  12  -3  -4  200.68   19.10
  12  -3  -4  231.18   17.10
 -12  -3   4  195.38   22.90
 -12  -3   4  243.38   26.70
 -12   3   4  197.68   17.90
 -12   3   4  231.78   18.70
 -12   3   4  185.58   20.00
  12   3  -4  219.08   24.50
  12   3  -4  212.38   27.70
  12   3  -4  200.68   24.10
  11  -3  -4   78.59   12.90
 -11  -3   4   66.59   18.30
 -11  -3   4   76.69   15.80
 -11  -3   4   87.99   16.80
  11  -3  -4   74.99   12.30
  11  -3  -4   81.29    9.90
  11   3  -4   55.99   16.30
 -11   3   4   85.39   11.30
  11   3  -4   63.89   16.80
  11   3  -4   72.39   18.80
 -11   3   4   70.19   12.10
 -10  -3   4   27.20   13.10
 -10  -3   4   14.60   15.40
 -10  -3   4   37.00   14.60
  10  -3  -4   34.10    7.90
  10  -3  -4   58.69   10.50
  10  -3  -4   28.90   10.10
 -10   3   4   30.00    9.00
  10   3  -4   28.30   15.40
  10   3  -4   15.50   13.70
  10   3  -4   36.90   14.50
 -10   3   4   39.00    9.30
  -9  -3   4  548.65   33.40
   9  -3  -4  548.15   27.20
   9  -3  -4  494.75   28.40
   9  -3  -4  496.75   29.00
  -9  -3   4  531.15   31.90
  -9   3   4  504.45   27.70
   9   3  -4  478.05   35.10
   9   3  -4  508.35   32.50
  -9   3   4  531.85   28.10
   9   3  -4  471.15   33.60
  -8  -3   4  414.96   27.40
   8  -3  -4  416.66   23.20
  -8  -3   4  436.06   28.80
   8  -3  -4  448.36   23.70
  -8  -3   4  413.06   29.20
   8   3  -4  401.06   30.80
   8   3  -4  406.16   27.90
   8   3  -4  400.46   28.60
  -8   3   4  419.76   23.00
  -7  -3   4   65.49   13.10
   7  -3  -4   52.49    7.10
  -7  -3   4   55.09   11.70
  -7  -3   4   67.29   14.10
   7   3  -4   32.90   12.00
   7   3  -4   45.80   11.70
   7   3  -4   43.10   13.70
  -6  -3   4    9.20   10.90
   6  -3  -4   11.90    5.50
  -6  -3   4   -1.90   10.70
   6  -3  -4   14.50    5.40
   6   3  -4    8.20   11.80
   6   3  -4   21.00   10.30
  -5  -3   4  264.57   21.10
   5  -3  -4  219.88   14.90
   5  -3  -4  262.77   15.50
  -5  -3   4  265.57   20.10
   5  -3  -4  277.27   15.10
   5   3  -4  274.17   21.00
  -5   3   4  280.67   15.80
   5   3  -4  284.77   19.90
  -4  -3   4 1411.36   68.29
   4  -3  -4 1311.37   65.49
   4  -3  -4 1314.97   65.49
  -4  -3   4 1352.66   67.79
  -4  -3   4 1387.66   67.89
   4  -3  -4 1406.66   65.89
  -4   3   4 1352.76   65.59
  -4   3   4 1242.28   65.39
   4   3  -4 1334.77   67.69
   4   3  -4 1416.26   68.59
   4   3  -4 1360.26   67.79
  -3  -3   4  533.45   29.90
   3  -3  -4  471.05   26.60
  -3  -3   4  477.05   28.30
  -3  -3   4  509.85   29.20
   3  -3  -4  484.35   26.20
   3   3  -4  522.25   29.00
   3   3  -4  570.14   29.80
  -3   3   4  546.45   26.30
   3   3  -4  519.35   28.70
  -3   3   4  432.86   25.90
  -2  -3   4  708.83   38.50
  -2  -3   4  760.02   39.20
   2  -3  -4  729.13   37.00
   2   3  -4  696.53   38.60
   2   3  -4  766.22   38.40
   2   3  -4  691.53   38.20
  -2   3   4  709.63   36.60
   1  -3  -4  231.08   17.70
   1  -3  -4  324.57   17.80
   1  -3  -4  274.27   18.50
  -1  -3   4  319.57   19.50
   1   3  -4  292.67   18.70
  -1   3   4  260.27   17.50
   1   3  -4  313.07   19.60
   0  -3   4 1069.79   52.69
   0  -3  -4 1027.50   52.19
   0  -3  -4 1072.09   52.49
   0  -3  -4  987.70   51.69
   0  -3   4 1009.00   56.19
   0   3  -4 1090.09   51.79
   0   3   4 1059.09   51.99
   0   3   4 1023.40   51.79
   0   3  -4  965.70   52.69
  -1  -3  -4  224.18   17.60
   1  -3   4  213.58   17.00
  -1  -3  -4  199.08   17.50
  -1  -3  -4  188.88   16.20
   1  -3   4  277.27   17.50
  -1   3  -4  218.48   18.60
   1   3   4  235.38   17.20
  -1   3  -4  217.58   15.00
   1   3   4  204.48   16.20
  -1   3  -4  245.38   18.90
  -2  -3  -4  477.15   27.10
   2  -3   4  456.85   26.00
  -2  -3  -4  416.26   25.90
  -2  -3  -4  476.85   27.40
   2  -3   4  442.56   25.90
   2   3   4  437.06   25.80
  -2   3  -4  427.46   24.00
  -2   3  -4  438.76   27.00
  -2   3  -4  418.76   25.80
   2   3   4  463.85   26.60
  -3  -3  -4  458.65   27.60
   3  -3   4  484.05   27.40
   3  -3   4  494.05   27.80
  -3  -3  -4  482.95   29.60
  -3  -3  -4  494.05   29.00
   3   3   4  463.25   28.30
  -3   3  -4  456.85   28.30
   3   3   4  462.75   27.90
  -3   3  -4  470.65   27.20
   4  -3   4   21.10    9.30
   4  -3   4   36.30    9.70
  -4  -3  -4   46.80   12.30
  -4  -3  -4   31.60   12.70
  -4  -3  -4   37.50   10.40
   4   3   4   35.80   10.90
  -4   3  -4   42.70    9.50
  -4   3  -4   35.10   11.00
   4   3   4   35.50   10.20
  -5  -3  -4  143.09   17.60
  -5  -3  -4  137.89   17.00
  -5  -3  -4  155.48   19.50
   5  -3   4  144.99   16.00
   5  -3   4  143.69   16.00
   5   3   4  139.29   15.30
   5   3   4  136.79   15.20
  -5   3  -4  130.19   14.10
  -5   3  -4  140.69   15.30
  -5   3  -4  155.78   17.50
   6  -3   4  240.48   19.50
  -6  -3  -4  228.78   22.70
  -6  -3  -4  208.48   24.00
  -6  -3  -4  206.98   20.30
   6  -3   4  232.08   20.80
  -6   3  -4  240.98   21.00
   6   3   4  219.38   22.00
   6   3   4  214.68   21.30
  -6   3  -4  225.08   18.70
  -6   3  -4  243.58   17.30
  -7  -3  -4  480.05   32.40
   7  -3   4  516.85   29.60
  -7  -3  -4  424.46   30.00
   7  -3   4  437.26   29.30
  -7   3  -4  460.85   27.90
  -7   3  -4  491.95   30.20
   7   3   4  467.75   30.80
  -7   3  -4  486.05   28.60
   7   3   4  457.65   31.40
   8  -3   4  110.59   14.20
   8  -3   4   57.19   13.60
  -8  -3  -4   77.79   15.10
  -8  -3  -4   79.59   17.00
  -8  -3  -4   96.69   18.30
   8   3   4   98.79   16.40
  -8   3  -4   90.59   13.20
  -8   3  -4   91.39   13.60
   8   3   4   89.19   16.40
  -8   3  -4  104.99   15.10
  -9  -3  -4   24.00   17.30
  -9  -3  -4   36.10   22.30
   9  -3   4   24.60   12.90
   9  -3   4   18.40   13.30
  -9  -3  -4   16.20   20.40
  -9   3  -4   41.40   14.20
  -9   3  -4   15.40   12.00
  -9   3  -4   14.80   12.30
   9   3   4   27.90   15.70
 -10  -3  -4   75.19   18.90
 -10  -3  -4   65.69   16.00
 -10   3  -4   78.79   16.30
 -10   3  -4   87.79   15.10
  10   3   4   86.49   17.90
  10   3   4   76.79   17.30
 -10   3  -4   59.39   15.70
 -11  -3  -4   26.50   15.50
  11  -3   4    6.50   17.40
 -11  -3  -4   -9.10   18.40
 -11  -3  -4  -14.60   17.50
  11  -3   4   19.00   14.80
 -11   3  -4    4.50   15.20
  11   3   4  -15.00   16.10
  11   3   4   20.40   16.60
 -11   3  -4    3.40   13.60
 -12  -3  -4   -0.70   19.10
 -12  -3  -4   -5.00   15.30
 -12   3  -4  -10.90   22.60
  12   3   4  -18.40   18.40
 -12   3  -4   -8.60   14.60
  12   3   4    4.30   23.20
  13  -3   4  -16.90   17.70
 -13  -3  -4  -34.20   26.00
  13   3   4   60.19   19.60
 -13   3  -4   24.50   17.20
 -13  -4   4    7.90   23.00
  13  -4  -4   29.30   10.90
 -13  -4   4   -0.40   20.30
  13  -4  -4   19.30   12.40
  13   4  -4   25.80   22.20
  13   4  -4   28.90   24.50
  13   4  -4   27.10   35.90
 -12  -4   4   39.00   18.70
 -12  -4   4   77.19   17.30
  12  -4  -4   78.29   13.30
 -12  -4   4   89.49   19.60
  12   4  -4   80.19   18.90
  12   4  -4   89.19   22.70
 -12   4   4   75.49   12.90
  12   4  -4   69.59   19.20
 -11  -4   4   65.49   17.90
 -11  -4   4   62.49   17.70
  11  -4  -4   63.29   12.70
 -11   4   4   72.59   12.00
  11   4  -4   88.59   21.70
  11   4  -4   55.09   17.90
  11   4  -4   88.09   20.30
 -10  -4   4   32.80   15.50
 -10  -4   4   41.00   16.80
  10  -4  -4   10.00   10.20
 -10  -4   4   32.00   17.00
  10   4  -4   41.40   16.70
  10   4  -4   31.10   18.80
 -10   4   4   18.50    9.40
  10   4  -4    7.80   15.60
   9  -4  -4   65.49   10.30
  -9  -4   4   80.39   16.20
  -9  -4   4   77.49   17.30
  -9  -4   4   72.59   17.70
   9   4  -4  107.49   20.30
   9   4  -4   77.29   17.30
   9   4  -4   43.30   16.00
  -9   4   4   84.89   10.30
   8  -4  -4   74.29   10.10
  -8  -4   4   86.29   30.50
   8   4  -4   67.19   15.50
   8   4  -4   88.19   28.90
  -8   4   4   80.89    9.60
  -7  -4   4  298.87   25.30
   7  -4  -4  254.37   17.40
  -7  -4   4  268.97   24.60
  -7   4   4  259.57   17.30
   7   4  -4  306.97   26.20
   7   4  -4  259.27   23.50
   6  -4  -4  202.48   15.70
  -6  -4   4  213.28   22.30
  -6  -4   4  221.18   21.20
   6  -4  -4  223.48   15.50
   6   4  -4  196.68   21.10
   6   4  -4  228.08   23.20
  -6   4   4  194.58   15.60
  -5  -4   4   29.50   12.60
  -5  -4   4   -4.40   11.40
  -5  -4   4   29.00   13.10
   5  -4  -4   34.60    7.40
   5  -4  -4   11.30    8.40
   5   4  -4   15.80   11.40
  -5   4   4   32.60    8.20
   5   4  -4   32.50   13.20
   5   4  -4    3.90   11.90
  -5   4   4   19.80    8.30
  -4  -4   4  201.58   20.50
   4  -4  -4  211.88   16.20
  -4  -4   4  191.98   19.70
   4  -4  -4  218.98   16.90
  -4  -4   4  214.38   21.70
   4   4  -4  244.78   20.80
   4   4  -4  245.18   20.20
   4   4  -4  232.28   20.70
  -4   4   4  236.38   15.50
  -4   4   4  248.48   16.10
   3  -4  -4  359.16   22.30
  -3  -4   4  377.86   24.30
   3  -4  -4  342.57   20.30
  -3  -4   4  420.36   26.90
  -3  -4   4  357.46   25.60
   3  -4  -4  397.66   22.90
   3   4  -4  371.36   25.50
  -3   4   4  386.76   22.20
   3   4  -4  412.36   25.30
   3   4  -4  381.56   25.00
  -3   4   4  367.86   21.80
  -2  -4   4  332.87   24.70
   2  -4  -4  286.67   21.10
   2  -4  -4  317.37   21.60
  -2  -4   4  312.67   23.50
   2  -4  -4  390.66   22.10
   2   4  -4  364.26   24.30
  -2   4   4  360.26   21.10
   2   4  -4  334.57   23.20
   2   4  -4  359.66   22.70
  -2   4   4  336.27   20.50
   1  -4  -4  161.78   15.70
   1  -4  -4  216.08   17.50
  -1  -4   4  244.08   19.10
  -1  -4   4  223.18   20.00
   1   4  -4  230.28   18.30
   1   4  -4  235.68   16.90
  -1   4   4  191.88   16.00
   1   4  -4  187.98   19.40
   0  -4  -4  277.77   19.60
   0  -4  -4  209.98   18.50
   0  -4   4  247.68   20.70
   0  -4   4  254.57   19.80
   0   4  -4  219.68   20.60
   0   4   4  252.57   18.30
   0   4  -4  248.18   19.30
   1  -4   4  248.58   20.10
  -1  -4  -4  273.47   19.60
  -1  -4  -4  283.67   20.50
  -1  -4  -4  209.18   19.80
   1   4   4  238.08   19.80
  -1   4  -4  250.17   19.30
   1   4   4  228.88   18.70
  -1   4  -4  246.68   16.30
   2  -4   4  305.57   22.00
  -2  -4  -4  321.17   22.00
  -2  -4  -4  300.77   23.30
  -2  -4  -4  349.96   23.60
   2  -4   4  276.47   25.30
   2   4   4  272.97   21.40
  -2   4  -4  288.67   24.70
   2   4   4  328.67   27.00
  -2   4  -4  288.27   17.70
  -3  -4  -4  381.06   27.80
  -3  -4  -4  305.77   25.70
   3  -4   4  342.37   24.10
  -3  -4  -4  373.66   25.90
  -3   4  -4  306.87   35.50
  -3   4  -4  350.16   19.10
   3   4   4  345.67   24.20
   3   4   4  353.26   25.30
  -3   4  -4  372.56   26.10
  -4  -4  -4   -3.20   12.60
   4  -4   4   11.10   10.40
   4  -4   4   10.20   11.00
  -4  -4  -4  -14.10   12.70
  -4   4  -4    2.80   12.80
  -4   4  -4   16.00   10.60
   4   4   4  -15.80   11.70
   5  -4   4  209.68   20.40
  -5  -4  -4  233.68   23.60
   5  -4   4  237.98   20.20
  -5  -4  -4  186.98   23.10
  -5  -4  -4  196.18   20.90
   5   4   4  179.28   20.80
  -5   4  -4  225.38   19.40
  -5   4  -4  208.08   13.20
   5   4   4  219.08   22.60
  -5   4  -4  233.38   22.10
  -6  -4  -4   47.70   16.00
   6  -4   4   70.09   12.80
  -6  -4  -4   43.10   13.60
  -6  -4  -4   60.59   18.20
   6  -4   4   46.80   13.10
  -6   4  -4   52.49    7.60
   6   4   4   66.59   14.90
   6   4   4   69.39   15.50
  -6   4  -4   78.19   12.80
  -6   4  -4   38.90   14.20
   7  -4   4   28.40   13.10
   7  -4   4   28.20   12.40
  -7  -4  -4    5.50   13.00
  -7  -4  -4   43.20   18.30
  -7  -4  -4   51.09   16.80
  -7   4  -4   46.00   14.70
   7   4   4   51.99   16.20
  -7   4  -4   43.40   12.10
  -7   4  -4   38.60    8.90
  -8  -4  -4   14.50   15.90
  -8  -4  -4   34.30   14.60
   8  -4   4   16.30   12.50
  -8  -4  -4    8.70   16.10
   8   4   4   20.00   15.90
   8   4   4   29.20   16.00
  -8   4  -4   18.10   11.90
  -8   4  -4   25.60   14.40
   9  -4   4   25.00   13.40
  -9  -4  -4   31.00   15.30
   9  -4   4   44.20   14.10
  -9  -4  -4   30.30   19.80
  -9  -4  -4   35.60   26.10
   9   4   4   59.39   18.10
  -9   4  -4   48.40   13.00
  -9   4  -4   47.80   15.70
  -9   4  -4   45.10   10.40
   9   4   4   54.69   18.40
  10  -4   4   30.90   14.20
 -10  -4  -4    1.30   17.00
 -10  -4  -4   14.60   15.60
 -10  -4  -4   11.40   18.10
  10  -4   4  -13.60   15.70
  10   4   4   -3.10   15.60
 -10   4  -4   21.90   16.30
  10   4   4    9.50   17.00
 -10   4  -4    8.90   10.50
 -10   4  -4   -1.00   11.90
 -11  -4  -4   -1.30   21.30
 -11  -4  -4   10.40   17.60
  11  -4   4    0.70   14.80
 -11  -4  -4   48.40   19.10
  11  -4   4    4.70   14.70
 -11   4  -4   -9.90   12.80
 -11   4  -4   36.40   16.50
  11   4   4   52.19   30.50
  11   4   4    2.30   17.20
 -11   4  -4    2.40   11.40
  11  -5  -4   25.50   11.20
 -11  -5   4   12.00   17.20
 -11  -5   4   44.20   18.50
  11   5  -4   24.10   20.10
  11   5  -4   18.40   19.20
 -10  -5   4   81.59   21.00
 -10  -5   4  121.09   22.50
 -10   5   4  100.99   15.30
  10   5  -4  109.79   23.20
  10   5  -4   83.69   19.90
  -9  -5   4   40.30   16.60
  -9  -5   4   51.99   19.10
   9  -5  -4   50.89   11.30
   9  -5  -4   29.90   11.80
   9   5  -4   53.89   18.20
   9   5  -4   67.59   18.80
  -9   5   4   40.00   11.60
  -9   5   4   48.10   11.90
   8  -5  -4   37.50   10.80
  -8  -5   4   16.60   15.80
   8  -5  -4   46.90   10.00
  -8  -5   4   48.20   18.00
   8   5  -4   42.90   16.80
  -8   5   4   45.00   12.30
   8   5  -4   32.20   16.90
  -7  -5   4   45.60   16.90
  -7  -5   4   42.50   15.00
   7  -5  -4   40.20    9.70
  -7  -5   4   19.50   15.60
   7  -5  -4   36.20   10.40
  -7   5   4   37.60   12.80
   7   5  -4   34.80   16.00
   7   5  -4   52.09   19.40
   7   5  -4   47.60   14.50
  -6  -5   4  273.27   34.30
   6  -5  -4  202.48   17.00
   6  -5  -4  225.98   18.10
  -6  -5   4  201.48   24.70
  -6  -5   4  202.58   22.00
  -6   5   4  195.78   16.80
   6   5  -4  203.08   23.90
   6   5  -4  214.38   23.70
   6   5  -4  195.08   22.20
  -6   5   4  222.88   18.40
   5  -5  -4  261.17   19.60
   5  -5  -4  256.57   18.50
  -5  -5   4  252.67   25.70
  -5  -5   4  221.38   21.50
  -5  -5   4  232.38   24.60
  -5   5   4  238.28   18.50
   5   5  -4  269.07   23.10
   5   5  -4  276.97   24.40
   5   5  -4  267.37   24.10
   4  -5  -4  261.77   19.30
   4  -5  -4  278.27   19.80
  -4  -5   4  195.48   21.00
  -4  -5   4  231.08   23.50
  -4  -5   4  242.38   24.00
   4   5  -4  225.18   23.30
   4   5  -4  259.27   23.00
   4   5  -4  213.88   22.30
  -4   5   4  255.27   18.40
  -4   5   4  259.47   19.00
   3  -5  -4  354.46   22.90
   3  -5  -4  377.76   23.40
  -3  -5   4  260.37   24.90
  -3  -5   4  306.47   26.70
   3   5  -4  322.07   24.00
   3   5  -4  330.37   26.10
  -3   5   4  311.27   22.10
  -3   5   4  333.97   21.80
   3   5  -4  315.87   25.00
  -2  -5   4  506.15   33.10
   2  -5  -4  504.05   31.90
  -2  -5   4  558.54   34.80
   2  -5  -4  638.84   32.40
   2  -5  -4  530.75   28.30
   2   5  -4  523.75   32.80
   2   5  -4  498.95   33.50
  -2   5   4  519.45   30.30
   2   5  -4  514.45   31.10
  -2   5   4  521.85   30.50
  -1  -5   4  103.39   14.80
   1  -5  -4  119.09   14.30
  -1  -5   4   78.39   14.80
   1  -5  -4  138.69   17.30
   1  -5  -4   80.19   10.60
  -1   5   4   82.89   13.10
   1   5  -4  127.89   16.20
   1   5  -4  108.89   14.40
   1   5  -4  100.39   14.00
  -1   5   4   51.59   11.30
   0  -5   4  528.05   32.00
   0  -5  -4  528.15   31.00
   0  -5   4  506.85   32.50
   0  -5  -4  446.56   28.60
   0   5  -4  482.75   31.30
   0   5  -4  468.55   32.10
   0   5   4  520.45   30.70
   1  -5   4  111.79   14.90
  -1  -5  -4   77.69   13.10
  -1  -5  -4  102.89   15.50
   1  -5   4   93.99   15.40
  -1   5  -4  105.19   16.10
  -1   5  -4   99.39    9.60
  -1   5  -4  107.89   14.60
   1   5   4   80.39   13.30
   2  -5   4   80.19   13.90
  -2  -5  -4   90.69   14.70
  -2  -5  -4   70.99   13.90
   2   5   4   75.39   13.80
  -2   5  -4   93.09   14.50
  -2   5  -4   86.09   15.60
   3  -5   4   15.30   12.10
  -3  -5  -4    9.70   14.00
  -3  -5  -4    1.00   12.60
  -3  -5  -4   -0.30   13.00
   3   5   4   12.30   13.60
   3   5   4   17.90   12.10
  -3   5  -4   18.20   12.50
  -4  -5  -4   36.80   15.20
   4  -5   4   45.60   17.70
  -4  -5  -4   44.70   14.90
  -4  -5  -4   31.50   14.20
   4   5   4   42.90   14.10
   4   5   4   65.99   15.40
   5  -5   4   73.89   15.40
   5  -5   4   98.39   15.70
  -5  -5  -4   72.79   16.40
  -5  -5  -4  100.09   23.20
  -5  -5  -4   73.99   18.60
  -5   5  -4   84.19   14.10
   5   5   4   95.29   16.30
   5   5   4   95.39   17.60
   6  -5   4   67.89   14.60
  -6  -5  -4   51.89   19.30
  -6  -5  -4   39.40   16.40
  -6  -5  -4   75.79   18.80
   6  -5   4   64.89   14.60
   6   5   4   55.19   16.90
  -6   5  -4   63.49   17.00
  -6   5  -4   42.90   13.00
   6   5   4   57.39   16.40
  -7  -5  -4   80.99   23.90
   7  -5   4   51.69   16.00
  -7  -5  -4   63.39   15.70
   7  -5   4   89.29   15.60
  -7  -5  -4   39.30   17.10
  -7   5  -4   72.59   17.80
   7   5   4   47.20   15.10
   8  -5   4   60.39   15.00
  -8  -5  -4   12.30   17.80
  -8  -5  -4   12.60   19.60
  -8  -5  -4   39.00   16.20
   8   5   4   30.90   16.90
  -8   5  -4   58.29   25.90
   8   5   4   64.59   18.70
  -8   5  -4   34.40   12.10
   9  -5   4   21.10   14.80
   9  -5   4   49.80   15.00
  -9  -5  -4   21.20   15.80
  -9  -5  -4   73.09   19.40
  -9  -5  -4   31.40   19.00
   9   5   4   26.70   21.30
   9   5   4   55.49   18.70
  -9   5  -4   41.00   14.20
  -9   5  -4   26.50   17.40
  -7  -6   4  140.29   21.40
   7  -6  -4  172.48   18.00
  -7  -6   4  152.28   26.50
  -7  -6   4  167.68   21.80
   7  -6  -4  150.78   16.40
   7   6  -4  148.89   27.80
   7   6  -4  138.59   20.80
   7   6  -4  172.08   24.40
  -6  -6   4   55.89   15.80
   6  -6  -4   43.70   14.20
   6  -6  -4   57.79   11.40
  -6  -6   4   65.29   16.90
  -6  -6   4   41.50   18.10
   6   6  -4   52.59   17.50
   6   6  -4   41.70   16.20
   6   6  -4   46.00   16.10
  -6   6   4   68.89   10.80
  -5  -6   4  296.57   28.80
  -5  -6   4  298.67   28.60
   5  -6  -4  314.77   23.20
   5  -6  -4  305.47   21.90
  -5  -6   4  234.38   23.70
  -5   6   4  320.77   25.20
   5   6  -4  340.97   25.90
   5   6  -4  247.78   27.20
   5   6  -4  259.97   26.10
  -5   6   4  300.07   23.30
   4  -6  -4    6.70   12.20
   4  -6  -4    7.40   10.90
  -4  -6   4   30.50   16.70
  -4  -6   4   42.00   15.20
   4   6  -4   26.30   15.70
   4   6  -4    6.60   13.80
   4   6  -4   20.50   12.80
  -4   6   4   23.90   11.30
  -3  -6   4   30.50   14.90
   3  -6  -4   24.10   13.70
   3  -6  -4   45.20   12.00
  -3   6   4   23.20   12.50
   3   6  -4   37.30   13.90
  -3   6   4   34.40   13.00
   3   6  -4   22.30   12.10
   3   6  -4   27.10   14.90
   2  -6  -4  112.79   15.70
  -2  -6   4   82.79   16.40
  -2  -6   4   70.39   17.00
   2  -6  -4   90.29   14.90
  -2   6   4  116.39   18.40
   2   6  -4   92.49   17.40
   2   6  -4   85.69   12.40
   2   6  -4   91.59   16.10
  -2   6   4   95.59   12.80
  -1  -6   4  255.97   25.10
   1  -6  -4  228.58   21.70
   1  -6  -4  265.97   24.90
  -1  -6   4  254.87   25.60
   1  -6  -4  273.07   23.50
   1   6  -4  266.97   23.40
  -1   6   4  262.77   20.50
   1   6  -4  244.38   24.90
  -1   6   4  236.78   23.10
   0  -6  -4   79.29   11.50
   0  -6   4  102.49   17.30
   0  -6  -4   74.79   15.70
   0  -6  -4   73.59   14.90
   0  -6   4   95.39   16.50
   0   6  -4  104.09   16.10
   0   6  -4   91.09   15.80
   0   6   4   67.49   16.50
  -1  -6  -4   96.49   13.80
  -1  -6  -4  111.19   17.70
   1  -6   4  118.19   17.10
  -1  -6  -4  107.69   17.50
   1  -6   4   97.49   17.50
  -1   6  -4   89.89   15.30
   1   6   4   93.49   15.00
  -1   6  -4  108.79   17.30
   1   6   4   98.89   13.90
  -2  -6  -4  101.29   17.40
  -2  -6  -4   79.79   14.80
   2  -6   4   95.49   16.60
   2  -6   4  100.59   18.40
  -2   6  -4   95.29   17.10
  -2   6  -4  105.09   15.90
  -3  -6  -4   88.89   16.80
   3  -6   4  144.99   18.40
  -3  -6  -4   98.49   16.30
  -3   6  -4  117.59   16.30
   4  -6   4  101.99   18.80
  -4  -6  -4   87.19   19.40
  -4  -6  -4   80.39   15.90
  -4   6  -4   86.69   18.90
   4   6   4   53.09   18.30
  -5  -6  -4  155.58   23.50
   5  -6   4  136.19   21.40
  -5  -6  -4  102.99   18.00
  -5   6  -4  120.29   18.00
   5   6   4  129.39   19.30
 -17   0   5  -19.60   20.10
  17   0  -5  -12.90   23.00
  17   0  -5   -8.30   17.50
  17   0  -5  -25.90   18.00
 -17   0   5  -40.50   15.20
 -16   0   5   -0.30   16.00
  16   0  -5    9.50   16.40
 -16   0   5  -27.20   14.30
  16   0  -5  -18.10   18.30
  16   0  -5   12.40   17.70
 -15   0   5   17.60   15.20
  15   0  -5    4.30   16.90
  15   0  -5    5.70   18.20
 -15   0   5    9.60   16.70
  15   0  -5   21.40   15.60
  14   0  -5   33.90   17.60
  14   0  -5   51.99   16.10
 -14   0   5   49.00   15.30
 -14   0   5   43.40   16.80
  14   0  -5   23.40   14.60
  13   0  -5    3.80   13.90
 -13   0   5   -8.30   13.10
 -13   0   5   -4.80   14.00
  13   0  -5    7.70   16.20
  13   0  -5    4.70   13.00
  12   0  -5  236.68   25.80
 -12   0   5  302.57   24.50
 -12   0   5  209.08   26.90
  12   0  -5  346.27   24.10
  12   0  -5  267.37   25.90
  11   0  -5   14.40   10.80
 -11   0   5   -4.50   12.20
 -11   0   5   37.20    9.30
  11   0  -5    8.20   13.90
  11   0  -5   24.10   11.70
 -11   0   5    5.50   11.10
 -10   0   5   43.90   10.60
 -10   0   5   55.99   12.50
  10   0  -5   56.19   13.30
  10   0  -5   61.79   11.00
 -10   0   5   57.69    9.70
  10   0  -5   70.99   11.10
   9   0  -5    1.90   11.70
   9   0  -5    5.40    8.80
  -9   0   5   -1.40    9.90
  -9   0   5    7.80    7.70
   9   0  -5   -9.10    8.70
  -9   0   5    6.80    9.00
   8   0  -5 1042.40   56.69
  -8   0   5 1102.69   56.79
   8   0  -5 1090.59   54.79
  -8   0   5 1122.19   54.09
  -8   0   5 1087.79   54.59
   8   0  -5 1121.09   54.69
   7   0  -5   48.20    8.30
   7   0  -5   63.59   12.30
  -7   0   5   40.40   10.60
  -7   0   5   52.19    7.40
  -7   0   5   68.39    8.80
   7   0  -5   51.49    8.20
   6   0  -5    4.10    6.50
   6   0  -5    9.10   10.20
  -6   0   5    2.70    6.90
  -6   0   5   -3.70    9.60
   6   0  -5   -3.50    6.70
  -6   0   5    0.00    6.00
   5   0  -5   94.19   12.30
   5   0  -5   80.29    8.00
  -5   0   5   93.99    8.50
  -5   0   5   91.69   11.70
   4   0  -5  419.66   24.80
   4   0  -5  411.06   21.30
   4   0  -5  398.66   21.50
   3   0  -5 1225.98   59.09
  -3   0   5 1185.98   59.69
   3   0  -5 1165.58   62.49
   3   0  -5 1291.67   58.99
  -2   0   5  210.98   15.20
   2   0  -5  244.78   13.50
   2   0  -5  210.28   13.80
  -2   0   5  223.48   13.50
  -1   0   5  280.17   17.60
   1   0  -5  286.27   16.10
  -1   0   5  263.37   16.20
   1   0  -5  246.48   16.10
   0   0   5  474.95   26.00
   0   0  -5  493.75   25.50
   0   0  -5  481.95   26.10
  -1   0  -5  675.43   35.30
  -1   0  -5  668.13   35.80
   1   0   5  740.53   35.90
   1   0   5  679.33   35.70
  -2   0  -5  464.05   26.00
  -2   0  -5  454.55   25.40
   2   0   5  452.45   26.50
   2   0   5  446.66   25.70
  -3   0  -5  152.28   16.20
   3   0   5  130.79   14.70
   3   0   5  129.79   15.90
  -3   0  -5  141.49   14.70
   4   0   5   19.90    8.80
  -4   0  -5   19.90    8.70
  -4   0  -5   10.10    9.80
   4   0   5    7.00    9.50
  -5   0  -5 1481.55   71.79
   5   0   5 1408.16   71.19
  -5   0  -5 1452.25   70.89
   5   0   5 1396.16   70.69
  -5   0  -5 1372.26   70.89
   6   0   5  423.46   26.40
  -6   0  -5  402.56   26.30
  -6   0  -5  384.16   26.60
   6   0   5  414.76   25.70
  -6   0  -5  413.76   25.60
  -7   0  -5  106.59   14.20
  -7   0  -5  126.29   14.60
  -7   0  -5  106.99   13.00
   7   0   5  118.89   13.90
   7   0   5  101.59   14.00
  -8   0  -5  114.99   15.80
  -8   0  -5   89.69   13.40
   8   0   5   99.79   15.20
   8   0   5  106.59   14.60
  -8   0  -5   95.19   14.90
  -9   0  -5  170.08   20.30
  -9   0  -5  209.88   22.70
   9   0   5  188.78   21.10
  -9   0  -5  166.18   22.00
   9   0   5  202.98   22.40
 -10   0  -5    2.50   12.60
  10   0   5   -9.20   14.00
 -10   0  -5    5.60   14.10
 -10   0  -5  -18.50   13.90
  10   0   5   11.90   13.70
 -11   0  -5    0.00   14.90
  11   0   5   28.50   15.40
 -11   0  -5    0.10   13.50
  11   0   5   12.60   15.60
 -11   0  -5   12.90   15.00
 -12   0  -5   -1.30   14.40
 -12   0  -5   14.90   16.10
  12   0   5    3.30   16.30
 -12   0  -5    7.60   17.10
  13   0   5    3.70   16.70
 -13   0  -5   -0.90   17.20
 -13   0  -5   13.60   16.80
  13   0   5    2.30   17.50
 -13   0  -5  -16.40   14.60
 -14   0  -5   30.80   15.50
 -14   0  -5    2.30   28.50
  14   0   5    2.20   19.20
 -14   0  -5   19.10   17.10
  14   0   5   15.80   20.20
 -16  -1   5  -14.20   16.20
 -16  -1   5   -4.50   13.10
  16  -1  -5    9.70   14.50
  16  -1  -5  -10.30   18.10
  16  -1  -5   -8.50   16.30
 -16   1   5    2.00   14.20
  16   1  -5   10.80   19.10
  16   1  -5  -44.10   17.20
 -16   1   5  -31.60   22.40
 -15  -1   5    1.80   16.70
 -15  -1   5   16.00   14.40
 -15  -1   5    8.80   15.70
  15  -1  -5   15.00   15.40
  15  -1  -5    8.80   17.00
  15  -1  -5   29.30   14.70
  15   1  -5   45.60   17.00
 -15   1   5   12.20   13.80
  15   1  -5    7.90   16.60
  15   1  -5    4.30   19.20
 -15   1   5    2.40   16.10
 -14  -1   5   75.89   16.50
 -14  -1   5   84.49   18.20
  14  -1  -5   95.59   16.30
 -14  -1   5   86.49   16.80
  14  -1  -5  100.29   19.10
  14  -1  -5  116.19   16.20
  14   1  -5   64.39   18.70
  14   1  -5   83.49   17.60
  14   1  -5   70.99   18.20
 -14   1   5   84.79   13.50
 -14   1   5   74.89   14.80
 -14   1   5   79.39   17.70
 -13  -1   5   64.59   15.10
  13  -1  -5  126.49   15.30
 -13  -1   5   77.89   15.70
  13  -1  -5   95.09   17.50
 -13  -1   5   72.09   16.80
  13  -1  -5   94.39   15.30
 -13   1   5   88.29   16.90
 -13   1   5   92.69   14.10
  13   1  -5   73.29   15.90
  13   1  -5   79.49   20.00
  13   1  -5   80.39   16.10
 -13   1   5   91.39   15.20
 -12  -1   5  108.89   17.10
  12  -1  -5   99.49   17.40
  12  -1  -5  146.79   15.10
 -12  -1   5  123.59   16.00
 -12  -1   5  130.99   15.30
 -12   1   5  136.19   14.30
  12   1  -5  132.99   16.50
 -12   1   5  127.99   16.50
 -12   1   5  131.09   14.30
  12   1  -5  114.69   16.50
  12   1  -5  108.49   19.80
 -11  -1   5   25.80   11.20
  11  -1  -5    3.70   12.50
 -11  -1   5   23.80   13.80
  11  -1  -5   17.30   10.50
  11  -1  -5   20.00   10.60
 -11  -1   5   38.80   12.40
  11   1  -5   34.80   12.40
 -11   1   5   16.50    9.20
 -11   1   5    3.50   10.10
  11   1  -5   -4.70   13.60
  11   1  -5   15.70   12.30
 -11   1   5    7.80   12.60
 -10  -1   5  146.19   19.50
 -10  -1   5  164.68   16.00
  10  -1  -5  140.19   18.70
 -10  -1   5  170.38   17.90
  10  -1  -5  179.38   15.80
  10  -1  -5  141.19   15.50
  10   1  -5  146.99   17.60
 -10   1   5  156.38   13.40
 -10   1   5  175.88   18.70
 -10   1   5  169.78   15.40
   9   1  -5   21.80    9.90
  -8  -1   5  207.98   19.00
   8  -1  -5  188.18   14.10
   8  -1  -5  189.98   17.50
  -8  -1   5  201.88   16.60
  -8  -1   5  192.98   15.30
  -8   1   5  218.48   12.70
   8   1  -5  163.78   17.10
   8   1  -5  151.88   16.20
   8   1  -5  166.08   19.60
  -8   1   5  173.68   17.60
  -8   1   5  216.28   13.70
  -7  -1   5  330.87   21.10
   7  -1  -5  367.76   19.60
  -7  -1   5  346.97   23.70
   7  -1  -5  354.06   22.80
  -7  -1   5  366.96   22.20
   7   1  -5  354.36   24.70
   7   1  -5  349.57   22.00
  -7   1   5  391.26   19.10
  -7   1   5  345.87   22.80
   7   1  -5  325.67   22.40
  -6  -1   5  289.27   20.90
   6  -1  -5  289.97   20.00
  -6  -1   5  295.07   19.60
   6  -1  -5  298.97   15.80
  -6  -1   5  310.07   18.40
  -6   1   5  295.37   19.60
   6   1  -5  242.78   21.40
   6   1  -5  305.67   19.00
   6   1  -5  275.87   19.40
  -5  -1   5  218.98   18.70
  -5  -1   5  238.78   17.40
   5  -1  -5  211.78   17.10
   5   1  -5  216.88   16.30
   5   1  -5  240.58   19.90
  -4  -1   5 2896.51  146.49
  -4  -1   5 3205.38  145.99
  -4  -1   5 3057.59  145.69
   4   1  -5 2939.61  145.69
   4   1  -5 3113.89  146.99
   4   1  -5 2996.00  145.69
  -3  -1   5 2174.38  104.49
   3   1  -5 2135.69  105.39
   3   1  -5 2188.28  104.49
   2  -1  -5  196.18   11.30
  -2  -1   5  168.88   14.10
  -2  -1   5  169.58   13.50
   2   1  -5  159.48   13.40
  -2   1   5  179.18   11.10
   2   1  -5  172.08   14.40
  -2   1   5  184.38   11.30
   2   1  -5  180.68   15.90
  -1  -1   5  370.56   21.50
   1  -1  -5  361.76   20.10
   1  -1  -5  387.16   20.40
   1   1  -5  371.16   20.90
  -1   1   5  354.26   20.00
   1   1  -5  376.06   21.60
   0  -1  -5  857.91   39.90
   0  -1  -5  809.62   39.60
   0  -1   5  814.72   40.20
   0  -1   5  649.93   43.30
   0   1   5  797.32   39.60
   0   1  -5  766.32   40.20
   0   1   5  789.82   39.50
   0   1  -5  777.92   40.00
   1  -1   5 2201.48  121.19
  -1  -1  -5 2603.54  119.39
   1  -1   5 2396.46  119.39
  -1  -1  -5 2454.45  119.19
   1   1   5 2558.24  119.29
   1   1   5 2538.55  119.29
  -1   1  -5 2559.34  119.59
  -2  -1  -5 2751.22  128.59
   2  -1   5 2624.44  128.39
  -2  -1  -5 2571.64  128.29
   2   1   5 2701.13  128.49
   2   1   5 2650.73  128.39
  -2   1  -5 2595.94  128.39
  -2   1  -5 2732.63  128.39
  -3  -1  -5 1186.18   60.29
   3  -1   5 1231.88   60.89
   3  -1   5 1212.78   60.49
  -3   1  -5 1237.38   60.19
  -3   1  -5 1209.88   60.49
   3   1   5 1203.28   60.49
   3   1   5 1175.38   61.49
   4  -1   5   89.79   11.30
  -4  -1  -5   88.29   12.30
  -4  -1  -5  105.99   13.90
  -4  -1  -5   81.59   10.80
   4  -1   5   95.29   11.40
   4   1   5   94.99   11.90
  -4   1  -5  106.29   13.20
   4   1   5  119.49   12.40
  -4   1  -5   95.09   11.70
  -5  -1  -5  654.83   36.90
  -5  -1  -5  717.13   37.80
  -5  -1  -5  709.93   38.70
   5  -1   5  648.74   36.90
   5  -1   5  700.23   36.90
  -5   1  -5  683.53   36.60
  -5   1  -5  664.93   37.10
   5   1   5  696.43   37.30
   5   1   5  660.83   37.40
  -6  -1  -5  907.41   49.00
   6  -1   5 1001.20   49.20
  -6  -1  -5  967.80   49.70
   6  -1   5  911.71   49.20
  -6  -1  -5  898.01   50.39
  -6   1  -5  966.70   48.90
   6   1   5  937.81   49.30
  -6   1  -5  952.90   49.30
   6   1   5  906.31   49.60
  -6   1  -5  946.81   49.50
  -7  -1  -5  580.24   35.60
  -7  -1  -5  571.14   34.90
   7  -1   5  571.24   34.40
  -7  -1  -5  590.84   34.00
   7  -1   5  610.74   34.00
  -7   1  -5  573.44   34.00
   7   1   5  549.35   34.30
   7   1   5  563.84   34.90
  -7   1  -5  617.84   34.50
  -7   1  -5  603.04   33.70
   8  -1   5  125.39   16.10
   8  -1   5  194.08   19.30
  -8  -1  -5  147.09   21.10
  -8  -1  -5  145.69   17.40
  -8  -1  -5  140.69   15.80
   8   1   5  165.28   17.50
  -8   1  -5  152.58   19.70
   8   1   5  128.89   16.00
  -8   1  -5  140.29   18.10
  -8   1  -5  164.18   16.70
   9  -1   5    6.20   13.30
  -9  -1  -5   17.40   12.40
  -9  -1  -5   26.30   14.90
   9  -1   5   13.50   13.80
  -9  -1  -5   12.80   14.60
  -9   1  -5   25.70   13.60
   9   1   5   34.00   13.80
  -9   1  -5   23.30   12.30
   9   1   5   24.20   14.20
  -9   1  -5   29.00   14.50
  10  -1   5   18.50   14.00
 -10  -1  -5   -8.30   14.30
 -10  -1  -5   -5.00   15.00
 -10  -1  -5   22.10   13.30
  10  -1   5    1.30   14.20
  10   1   5   15.60   15.20
  10   1   5   -3.20   14.60
 -10   1  -5   13.30   14.00
 -10   1  -5   10.00   12.80
 -10   1  -5   -0.70   15.50
  11  -1   5  294.77   25.70
 -11  -1  -5  243.28   27.00
 -11  -1  -5  201.38   22.70
 -11  -1  -5  219.68   23.30
  11  -1   5  235.78   25.30
 -11   1  -5  193.28   25.40
  11   1   5  196.68   25.70
 -11   1  -5  208.68   22.50
  11   1   5  175.38   22.40
 -11   1  -5  204.68   24.80
 -12  -1  -5   79.59   16.80
 -12  -1  -5   66.89   18.30
  12  -1   5   88.09   18.60
  12  -1   5   64.99   17.40
 -12  -1  -5   28.10   16.70
  12   1   5   71.19   29.50
 -12   1  -5   33.20   17.20
 -12   1  -5   73.09   16.30
 -12   1  -5   63.29   17.10
  12   1   5   70.89   17.90
 -13  -1  -5   50.19   20.10
  13  -1   5   39.30   19.10
 -13  -1  -5   37.50   18.60
 -13  -1  -5   51.19   17.20
  13  -1   5   59.69   22.70
 -13   1  -5   24.10   19.50
  13   1   5   52.19   18.70
 -13   1  -5   35.00   15.30
  13   1   5   65.19   19.60
  14  -1   5   10.20   19.70
 -14  -1  -5   -9.60   18.30
  14  -1   5   -1.50   18.00
 -14  -1  -5   24.60   25.90
 -14  -1  -5   10.70   18.50
  14   1   5   -7.20   22.00
 -14   1  -5   -2.20   17.00
 -14   1  -5   10.00   18.40
 -14   1  -5    3.00   15.20
  14   1   5    7.80   20.00
  16  -2  -5   -5.50   13.90
  16  -2  -5   -1.40   17.20
 -16  -2   5   -2.30   17.60
 -16  -2   5    9.50   16.70
 -16  -2   5   -6.70   18.50
 -16   2   5   19.00   13.90
  16   2  -5  -24.80   18.30
 -16   2   5  -10.70   16.50
  16   2  -5   10.80   23.40
 -16   2   5    3.40   12.50
  16   2  -5   10.70   21.00
 -15  -2   5   19.90   17.00
 -15  -2   5   31.40   17.30
  15  -2  -5   21.90   16.70
  15  -2  -5   30.90   13.70
 -15  -2   5   19.70   18.10
  15   2  -5   36.30   17.80
  15   2  -5   21.50   18.90
 -15   2   5   21.20   16.30
 -15   2   5   24.00   12.40
  15   2  -5   30.10   18.40
 -14  -2   5   97.69   18.40
 -14  -2   5   52.39   18.00
  14  -2  -5   81.99   17.30
 -14  -2   5   91.99   18.80
  14  -2  -5  139.49   15.30
  14  -2  -5  125.09   18.80
  14   2  -5  100.89   21.30
  14   2  -5   99.19   18.80
  14   2  -5  117.29   22.60
 -14   2   5   85.59   13.30
 -14   2   5  108.39   18.90
 -13  -2   5   -5.60   13.40
 -13  -2   5   -9.90   14.80
  13  -2  -5    3.70   12.80
 -13  -2   5    1.10   14.50
  13  -2  -5   14.60   10.90
  13  -2  -5    7.30   14.50
 -13   2   5    5.40   10.50
  13   2  -5    7.90   15.30
 -13   2   5   -5.80   12.00
  13   2  -5    4.60   18.00
  13   2  -5  -32.10   14.50
 -13   2   5    1.20   14.10
 -12  -2   5   57.29   15.60
  12  -2  -5  104.09   11.50
 -12  -2   5   93.89   14.90
 -12  -2   5   68.69   15.60
  12  -2  -5   94.29   15.90
  12  -2  -5   56.99   15.00
 -12   2   5   85.79   11.60
  12   2  -5   71.79   18.80
 -12   2   5   58.79   15.10
  12   2  -5   59.79   16.00
 -12   2   5   79.69   10.90
  12   2  -5   81.79   17.00
 -11  -2   5   56.79   14.00
  11  -2  -5   61.19   11.40
 -11  -2   5   67.59   14.00
  11  -2  -5   64.89    9.30
 -11  -2   5   37.40   14.50
  11  -2  -5   65.79   13.90
 -11   2   5   44.20   13.60
 -11   2   5   55.59   10.50
 -11   2   5   56.79    9.20
  11   2  -5   56.59   14.70
  11   2  -5   45.30   16.70
  10  -2  -5   95.59   10.90
 -10  -2   5   94.59   14.20
 -10  -2   5  102.39   17.20
  10  -2  -5   93.49   13.40
  10  -2  -5  117.29   10.90
  10   2  -5   89.79   18.30
  10   2  -5   66.19   14.30
 -10   2   5   51.19   13.40
 -10   2   5   88.59   10.40
 -10   2   5   88.69    9.30
  10   2  -5   76.39   15.00
   9  -2  -5  105.99   11.60
  -9  -2   5   77.09   13.80
  -9  -2   5   98.09   14.70
   9  -2  -5   97.49   12.10
  -9  -2   5   82.69   13.60
   9   2  -5   91.99   16.70
   9   2  -5   65.59   13.40
  -9   2   5   98.99    9.70
  -9   2   5  101.69   13.00
   9   2  -5   92.89   13.30
   8  -2  -5  623.24   30.70
  -8  -2   5  563.04   32.10
  -8  -2   5  552.84   33.00
  -8  -2   5  514.65   31.10
   8   2  -5  495.15   33.60
   8   2  -5  523.65   32.00
   8   2  -5  533.75   31.50
  -7  -2   5   50.39   10.90
  -7  -2   5   70.49   10.40
   7  -2  -5   57.79    9.20
  -7  -2   5   47.70   10.80
   7   2  -5   40.80   10.70
   7   2  -5   66.19   14.00
   7   2  -5   54.89   10.50
  -6  -2   5  708.03   39.30
   6  -2  -5  720.63   37.80
  -6  -2   5  792.12   39.10
   6   2  -5  697.93   38.20
   6   2  -5  694.73   40.10
  -5  -2   5  775.92   40.50
  -5  -2   5  760.02   40.60
   5  -2  -5  784.92   39.70
   5   2  -5  752.92   39.90
   5   2  -5  733.83   41.20
  -4  -2   5  463.45   25.60
  -4  -2   5  434.76   26.20
  -4  -2   5  402.86   25.80
   4   2  -5  419.96   26.30
   4   2  -5  427.46   25.20
   4   2  -5  459.85   25.50
  -3  -2   5  594.14   32.60
  -3  -2   5  579.84   32.90
  -3  -2   5  576.84   33.10
   3   2  -5  609.64   32.40
   3   2  -5  616.54   32.60
   3   2  -5  638.34   33.60
  -2  -2   5  517.55   28.80
   2  -2  -5  493.15   26.80
   2  -2  -5  505.45   26.20
  -2   2   5  532.45   26.30
   2   2  -5  518.95   29.00
  -2   2   5  510.45   26.50
   2   2  -5  531.35   28.50
  -1  -2   5  875.51   44.80
  -1  -2   5  918.31   45.00
   1  -2  -5  859.51   43.50
   1  -2  -5  905.81   44.00
   1   2  -5  856.61   44.70
  -1   2   5  853.91   43.60
   1   2  -5  871.41   44.80
   1   2  -5  872.81   45.30
   0  -2   5  376.46   21.60
   0  -2  -5  314.17   20.00
   0  -2  -5  316.47   21.10
   0  -2   5  368.26   21.50
   0   2  -5  351.56   21.20
   0   2  -5  349.57   22.00
   0   2   5  330.67   20.30
   0   2   5  341.17   20.30
   1  -2   5  291.07   19.00
  -1  -2  -5  297.17   19.40
  -1  -2  -5  252.37   17.90
   1  -2   5  243.18   22.50
   1   2   5  262.47   18.10
   1   2   5  267.27   18.40
  -1   2  -5  273.47   19.10
  -1   2  -5  288.67   18.30
  -2  -2  -5  175.78   15.40
   2  -2   5  180.78   15.70
  -2  -2  -5  185.88   16.80
  -2  -2  -5  159.68   17.00
  -2   2  -5  183.98   15.70
   2   2   5  162.28   15.80
  -2   2  -5  176.18   14.90
   2   2   5  159.78   15.20
  -3  -2  -5  425.46   27.40
  -3  -2  -5  398.96   25.20
   3  -2   5  407.76   25.10
  -3  -2  -5  483.05   33.60
   3  -2   5  462.65   30.80
   3   2   5  400.36   25.20
   3   2   5  482.35   31.70
  -3   2  -5  407.56   24.80
  -3   2  -5  419.06   25.60
   4  -2   5   22.10   10.90
  -4  -2  -5   22.70   10.90
  -4  -2  -5   24.70   11.00
   4  -2   5   30.80    9.20
  -4  -2  -5   27.50    9.10
   4   2   5   23.50    9.50
   4   2   5   27.50   10.20
  -4   2  -5    8.80    8.40
  -4   2  -5   20.30    9.80
  -5  -2  -5  321.17   24.80
   5  -2   5  316.87   22.00
  -5  -2  -5  301.97   23.70
   5  -2   5  317.17   22.10
  -5  -2  -5  304.37   22.00
  -5   2  -5  322.57   22.50
   5   2   5  328.07   22.40
   5   2   5  295.07   22.60
  -5   2  -5  335.87   21.10
  -6  -2  -5   61.89   14.70
  -6  -2  -5   59.19   13.50
   6  -2   5   90.69   12.20
  -6  -2  -5   51.49   11.60
   6  -2   5   64.09   11.70
  -6   2  -5   86.09   12.00
   6   2   5   77.09   13.10
   6   2   5   78.39   12.70
  -6   2  -5   73.19   12.40
  -6   2  -5   88.79   11.50
   7  -2   5   38.20   11.40
  -7  -2  -5   26.10   11.40
   7  -2   5   37.80   11.70
  -7  -2  -5   29.60   14.60
  -7  -2  -5    6.00   13.30
  -7   2  -5   17.00   11.40
   7   2   5   35.60   12.90
   7   2   5   19.60   12.50
  -7   2  -5   28.10   12.10
  -7   2  -5   38.90   11.10
  -8  -2  -5  150.68   22.60
  -8  -2  -5  162.48   19.60
   8  -2   5  164.38   19.80
  -8  -2  -5  172.38   20.20
   8  -2   5  122.79   16.40
   8   2   5  139.99   17.50
  -8   2  -5  177.98   18.90
  -8   2  -5  148.19   18.50
  -8   2  -5  173.98   20.70
   8   2   5  158.78   18.70
   9  -2   5   87.99   15.00
   9  -2   5   59.39   14.80
  -9  -2  -5   63.89   18.10
  -9  -2  -5   57.09   13.60
  -9  -2  -5   49.40   16.10
  -9   2  -5   79.49   15.30
   9   2   5   52.59   15.60
  -9   2  -5   74.09   13.70
  -9   2  -5   70.39   14.30
   9   2   5   56.99   16.90
 -10  -2  -5  -15.10   13.00
  10  -2   5    8.50   13.70
 -10  -2  -5  -28.60   16.40
  10  -2   5    4.80   14.50
 -10  -2  -5   -6.10   16.10
 -10   2  -5    7.10   12.80
  10   2   5  -46.40   14.80
 -10   2  -5  -19.30   13.40
  10   2   5   -9.30   14.80
 -10   2  -5   -0.20   14.30
  11  -2   5  -12.40   16.40
 -11  -2  -5   -6.80   17.00
 -11  -2  -5  -28.30   18.30
 -11  -2  -5    2.90   18.70
  11  -2   5   -7.00   15.00
  11   2   5    7.60   16.20
 -11   2  -5    9.50   13.60
 -11   2  -5   -2.80   14.90
 -12  -2  -5   14.00   15.20
 -12  -2  -5   13.50   26.20
  12  -2   5   32.00   17.30
 -12  -2  -5   23.30   20.60
  12  -2   5    8.00   16.30
 -12   2  -5    8.70   16.10
 -12   2  -5    7.10   16.60
 -12   2  -5   13.40   13.80
  12   2   5    6.70   19.20
 -13  -2  -5    2.90   19.50
  13  -2   5   14.10   17.50
  13  -2   5   31.40   18.00
 -13  -2  -5   43.90   17.60
 -13  -2  -5    6.10   19.30
 -13   2  -5   28.30   17.50
  13   2   5   17.50   20.80
 -13   2  -5   40.00   17.30
 -13   2  -5   -2.40   14.60
  13   2   5   44.40   18.50
  15  -3  -5    3.30   13.50
  15  -3  -5   30.60   15.90
  15  -3  -5    8.80   10.40
 -15  -3   5   -3.20   14.90
 -15  -3   5   -3.40   17.30
 -15  -3   5  -11.80   17.60
  15   3  -5   13.80   18.80
  15   3  -5   15.40   20.80
  15   3  -5   41.20   19.70
 -15   3   5   10.30   11.30
 -15   3   5   10.20   13.40
 -14  -3   5   -3.40   18.30
 -14  -3   5   -3.60   14.50
  14  -3  -5   24.20   14.10
 -14  -3   5  -14.90   16.50
  14  -3  -5   24.00    9.80
 -14   3   5    5.20   10.60
  14   3  -5   25.20   19.40
  14   3  -5   -1.30   17.90
  14   3  -5    0.80   17.30
 -13  -3   5    5.30   15.60
  13  -3  -5   32.80   12.90
 -13  -3   5    6.80   16.30
  13  -3  -5   21.20    9.10
 -13  -3   5   40.80   18.90
  13  -3  -5   -0.10   13.10
 -13   3   5   18.80   10.20
  13   3  -5   11.10   18.10
  13   3  -5   46.80   17.60
  13   3  -5   23.80   17.00
 -12  -3   5  101.99   18.20
 -12  -3   5  122.69   19.40
 -12  -3   5  144.09   21.80
  12  -3  -5  105.49   13.50
  12  -3  -5  136.99   17.30
  12   3  -5  121.79   18.20
  12   3  -5  153.28   23.60
  12   3  -5  111.69   19.40
 -11  -3   5  139.49   19.90
 -11  -3   5  125.39   18.60
  11  -3  -5  158.18   16.90
  11  -3  -5  145.19   17.10
 -11  -3   5  130.89   17.70
  11   3  -5   98.49   19.40
  11   3  -5  123.39   18.80
 -11   3   5  156.18   13.40
  11   3  -5  125.39   18.50
 -10  -3   5   32.30   14.10
 -10  -3   5    6.70   13.50
  10  -3  -5   35.70   10.70
  10  -3  -5   31.60    9.00
 -10  -3   5   35.50   13.60
 -10   3   5   29.00    8.60
  10   3  -5   29.20   14.20
  10   3  -5    2.20   16.50
  10   3  -5   22.20   14.20
  -9  -3   5  149.09   18.90
  -9  -3   5  155.28   19.90
  -9  -3   5  171.98   25.10
   9  -3  -5  146.59   12.70
   9  -3  -5  166.78   14.80
   9   3  -5  110.69   16.20
   9   3  -5  106.29   18.70
   9   3  -5  118.69   19.50
  -8  -3   5  182.48   20.80
   8  -3  -5  238.48   20.90
   8  -3  -5  212.48   13.40
  -8  -3   5  172.58   20.20
  -8  -3   5  167.68   18.80
   8   3  -5  170.88   18.30
   8   3  -5  180.48   19.90
   8   3  -5  164.98   22.50
  -7  -3   5  323.67   24.30
   7  -3  -5  342.47   19.30
  -7  -3   5  321.67   24.30
   7   3  -5  321.17   26.60
   7   3  -5  311.77   23.40
   6  -3  -5   42.90    7.30
  -6  -3   5   38.20   11.90
  -6  -3   5   40.40   11.50
   6   3  -5   49.60   13.10
   6   3  -5   32.70   10.80
  -5  -3   5  307.97   21.80
   5  -3  -5  280.97   17.40
   5  -3  -5  285.17   15.90
  -5  -3   5  276.77   22.10
   5  -3  -5  274.87   16.50
  -5  -3   5  316.97   22.00
   5   3  -5  323.27   21.30
   5   3  -5  333.17   21.30
   5   3  -5  305.87   23.10
   4  -3  -5   71.29    7.90
   4  -3  -5   72.19    6.70
  -4  -3   5   83.49   12.00
  -4  -3   5   72.89   11.70
  -4  -3   5   89.89   11.60
   4   3  -5   65.29   11.30
  -4   3   5   74.19    8.30
   4   3  -5   59.19   10.20
   4   3  -5   84.49   12.60
   3  -3  -5   35.80    7.40
  -3  -3   5   40.20    9.90
  -3  -3   5   45.70   10.80
  -3  -3   5   49.40   10.30
   3   3  -5   43.00   11.10
  -3   3   5   57.29    7.10
   3   3  -5   33.60    9.40
   3   3  -5   40.80   10.70
  -2  -3   5   27.20    8.90
   2  -3  -5   -7.50    7.10
  -2  -3   5   -9.70    9.20
   2   3  -5    1.80    9.20
  -2   3   5   12.40    6.60
   2   3  -5    3.40    8.10
   2   3  -5   -7.80    9.20
  -1  -3   5  111.69   11.90
   1  -3  -5   90.79   11.50
   1  -3  -5  106.59   11.00
   1   3  -5  108.49   13.30
  -1   3   5  109.49    9.90
   1   3  -5   82.99   10.80
   0  -3   5  246.38   18.20
   0  -3  -5  255.37   18.10
   0  -3  -5  217.48   16.70
   0  -3  -5  224.68   17.90
   0  -3   5  267.37   18.20
   0   3   5  249.58   16.70
   0   3  -5  203.68   19.60
   0   3  -5  265.77   17.00
   0   3  -5  228.18   18.00
   0   3   5  255.07   17.20
  -1  -3  -5  134.29   15.50
  -1  -3  -5  110.29   14.00
   1  -3   5  153.58   14.70
   1  -3   5  130.69   14.70
  -1  -3  -5  123.29   15.70
  -1   3  -5  120.79   14.10
  -1   3  -5  131.59   15.50
   1   3   5  122.49   14.70
   1   3   5  135.39   13.80
  -1   3  -5  147.29   14.20
  -2  -3  -5   68.89   10.30
  -2  -3  -5   52.69   11.20
   2  -3   5   72.39   10.70
  -2  -3  -5   70.59   12.30
   2  -3   5   56.39   10.00
  -2   3  -5   66.99   11.30
   2   3   5   64.79   10.20
   2   3   5   58.39   10.80
  -2   3  -5   73.69   10.10
   3  -3   5  157.88   16.50
  -3  -3  -5  178.88   18.40
   3  -3   5  179.98   16.50
  -3  -3  -5  179.98   19.00
  -3  -3  -5  152.58   16.60
  -3   3  -5  181.18   16.40
   3   3   5  171.78   17.50
   3   3   5  170.98   16.60
  -3   3  -5  160.18   17.60
  -4  -3  -5  187.38   18.50
  -4  -3  -5  211.68   20.40
   4  -3   5  228.58   18.60
   4  -3   5  209.78   20.70
  -4  -3  -5  203.08   21.30
  -4   3  -5  197.68   19.20
  -4   3  -5  211.98   17.80
   4   3   5  192.08   18.10
   4   3   5  194.48   19.60
   5  -3   5   42.00   11.30
  -5  -3  -5   40.00   14.00
   5  -3   5   43.00   12.20
  -5  -3  -5   31.80   11.20
  -5  -3  -5   39.20   13.80
  -5   3  -5   30.10   10.40
   5   3   5   35.30   12.60
  -5   3  -5   26.60    9.20
  -5   3  -5   30.50   11.90
   5   3   5   15.80   11.70
   6  -3   5  545.95   32.40
  -6  -3  -5  462.95   32.50
  -6  -3  -5  599.24   34.80
  -6  -3  -5  545.25   36.00
  -6   3  -5  539.85   31.80
   6   3   5  465.65   32.80
  -6   3  -5  601.84   30.70
   6   3   5  482.75   33.40
  -7  -3  -5   83.39   16.60
  -7  -3  -5  104.89   19.00
   7  -3   5   72.39   13.80
   7  -3   5   98.19   14.10
  -7  -3  -5   79.39   15.00
  -7   3  -5   77.19   14.60
   7   3   5   93.89   16.00
   7   3   5   90.89   16.00
  -7   3  -5   87.39   13.70
  -7   3  -5   97.29   13.30
  -8  -3  -5   55.79   17.40
  -8  -3  -5   61.79   21.40
  -8  -3  -5   52.09   16.80
   8  -3   5   66.69   14.60
   8  -3   5   70.49   14.20
   8   3   5   87.79   22.60
  -8   3  -5   89.19   14.80
  -8   3  -5   60.29   13.30
  -8   3  -5   66.89   14.70
   8   3   5   66.59   16.20
  -9  -3  -5   -2.10   14.50
   9  -3   5   -3.60   12.80
   9  -3   5    0.50   14.00
  -9  -3  -5   -9.00   12.90
   9   3   5   -9.50   15.40
   9   3   5  -10.30   22.00
  -9   3  -5  -26.90   11.90
  -9   3  -5   -0.40   13.70
  -9   3  -5    5.30   12.40
 -10  -3  -5  211.28   28.30
  10  -3   5  183.88   23.50
  10  -3   5  198.38   24.40
 -10  -3  -5  208.48   21.60
 -10  -3  -5  243.38   27.90
  10   3   5  183.28   24.30
 -10   3  -5  252.97   23.70
 -10   3  -5  184.88   24.60
 -10   3  -5  188.08   21.70
  10   3   5  190.88   22.50
  11  -3   5   34.10   16.00
 -11  -3  -5   29.10   15.80
 -11  -3  -5   56.29   20.20
  11  -3   5   28.90   16.30
 -11  -3  -5   30.00   20.60
  11   3   5   44.20   18.20
  11   3   5   46.30   20.40
 -11   3  -5   56.49   15.70
 -11   3  -5   41.10   16.80
 -11   3  -5   13.40   16.00
 -12  -3  -5   18.00   17.30
  12  -3   5    3.00   16.10
 -12  -3  -5   -0.90   18.90
 -12  -3  -5   -8.00   19.50
  12  -3   5   23.20   16.80
  12   3   5    8.60   18.30
 -12   3  -5   16.50   16.40
 -12   3  -5   16.10   15.70
  12   3   5   42.50   19.40
 -13  -4   5   19.60   27.00
 -13  -4   5   75.69   21.00
 -13  -4   5   53.69   28.30
  13   4  -5   46.00   18.70
  13   4  -5   74.29   22.60
  13   4  -5   26.40   28.00
 -12  -4   5   66.39   19.10
 -12  -4   5   71.49   18.40
 -12  -4   5   48.80   18.20
  12  -4  -5   63.09   13.10
  12   4  -5   68.19   21.00
  12   4  -5   82.49   23.40
  12   4  -5   66.79   18.60
 -11  -4   5  228.48   26.10
  11  -4  -5  210.68   16.70
 -11  -4   5  203.18   25.10
  11   4  -5  225.08   27.10
  11   4  -5  203.88   28.40
 -11   4   5  216.68   17.80
  11   4  -5  218.88   26.10
 -10  -4   5  199.28   25.80
  10  -4  -5  235.28   18.50
 -10  -4   5  208.68   25.70
  10   4  -5  212.18   27.50
  10   4  -5  245.08   27.30
  10   4  -5  258.77   25.10
 -10   4   5  227.88   16.60
   9  -4  -5  320.97   20.90
  -9  -4   5  277.27   27.60
  -9  -4   5  315.37   27.70
  -9   4   5  292.47   19.50
   9   4  -5  261.77   29.10
  -9   4   5  298.47   18.60
   9   4  -5  290.97   26.60
  -8  -4   5  140.49   18.80
  -8  -4   5   99.49   17.80
   8  -4  -5  103.59   12.00
   8  -4  -5  112.49   11.40
   8   4  -5  112.79   17.30
  -7  -4   5  427.96   30.10
   7  -4  -5  421.96   23.30
  -7  -4   5  418.36   30.50
   7  -4  -5  426.26   23.80
  -7  -4   5  404.26   30.00
  -7   4   5  433.36   23.10
   7   4  -5  396.76   29.00
   7   4  -5  395.96   29.10
   7   4  -5  417.06   31.50
  -7   4   5  442.06   24.00
  -6  -4   5  257.47   23.50
   6  -4  -5  247.38   16.70
  -6  -4   5  267.17   23.10
   6  -4  -5  247.88   16.00
  -6  -4   5  216.78   23.20
  -6   4   5  237.78   16.00
   6   4  -5  250.77   22.20
   6   4  -5  240.58   22.60
  -6   4   5  270.27   16.40
   6   4  -5  261.67   24.00
   5  -4  -5   54.79    6.60
  -5  -4   5   43.80   13.40
  -5  -4   5   40.50   14.00
  -5  -4   5   42.70   12.90
   5  -4  -5   58.19    7.90
   5  -4  -5   49.00    9.10
  -5   4   5   48.70    8.30
  -5   4   5   41.20    7.50
   5   4  -5   70.39   13.10
   5   4  -5   58.19   13.90
   5   4  -5   34.70   13.30
  -4  -4   5  -14.20   12.00
  -4  -4   5   -5.80   10.90
   4  -4  -5   -2.20    6.90
  -4  -4   5   16.30   11.30
   4  -4  -5  -13.80    8.00
   4   4  -5   -4.60   10.70
  -4   4   5   31.00    7.80
   4   4  -5    8.10   11.90
   4   4  -5   -5.10   11.60
   3  -4  -5  212.78   16.90
   3  -4  -5  188.68   16.50
  -3  -4   5  204.28   21.20
  -3  -4   5  217.38   20.10
  -3   4   5  236.68   15.80
   3   4  -5  264.17   20.20
  -3   4   5  215.98   15.40
   3   4  -5  202.18   20.50
   3   4  -5  201.38   19.20
   2  -4  -5  104.19   13.40
  -2  -4   5  122.09   15.30
   2  -4  -5  139.69   14.90
  -2  -4   5  120.69   14.20
   2   4  -5  154.28   16.90
   2   4  -5  157.48   15.60
  -2   4   5  137.59   13.40
   2   4  -5  138.39   16.50
   1  -4  -5  497.95   28.90
  -1  -4   5  488.15   31.20
   1  -4  -5  532.65   29.50
  -1  -4   5  451.85   30.50
   1   4  -5  554.14   29.50
   1   4  -5  500.25   31.20
  -1   4   5  517.75   28.90
   1   4  -5  506.75   30.40
   0  -4  -5  433.76   27.50
   0  -4  -5  444.56   26.90
   0  -4   5  452.45   28.40
   0  -4  -5  481.25   27.90
   0   4  -5  451.75   28.20
   0   4   5  416.76   27.00
   0   4  -5  496.65   26.60
   0   4   5  447.96   26.60
   1  -4   5   14.80   10.20
  -1  -4  -5   16.60   10.40
  -1  -4  -5  -11.40   10.50
  -1  -4  -5   12.90   11.60
   1   4   5   16.70    9.70
   1   4   5   13.00   10.60
  -1   4  -5   27.80   10.60
  -2  -4  -5    6.00   13.60
   2  -4   5    1.30   10.70
  -2  -4  -5  -14.60   11.10
  -2   4  -5   11.80   10.30
  -2   4  -5   13.00   16.50
  -2   4  -5   10.50    8.30
   3  -4   5   14.80   10.90
   3  -4   5   -1.50   10.40
  -3  -4  -5    8.20   12.60
  -3  -4  -5   -1.60   11.20
  -3  -4  -5   21.80   12.70
  -3   4  -5    4.70    7.60
   3   4   5    5.70   12.30
  -3   4  -5    1.50   10.10
   3   4   5   -6.40   11.70
  -3   4  -5  -16.20   12.70
   4  -4   5  152.48   19.00
  -4  -4  -5  177.28   19.60
  -4  -4  -5  139.99   16.30
  -4  -4  -5  164.88   21.70
   4  -4   5  183.48   18.70
   4   4   5  176.18   18.60
  -4   4  -5  169.28   18.30
  -4   4  -5  157.48   13.30
   4   4   5  171.98   17.80
  -4   4  -5  178.58   21.50
   5  -4   5  286.27   24.10
   5  -4   5  313.67   23.40
  -5  -4  -5  257.37   25.70
  -5  -4  -5  261.77   32.90
  -5  -4  -5  252.37   24.00
   5   4   5  289.47   24.90
  -5   4  -5  321.97   22.50
  -5   4  -5  302.07   25.00
   5   4   5  282.77   25.40
  -5   4  -5  268.57   22.50
   6  -4   5  137.89   15.90
   6  -4   5  118.49   15.90
  -6  -4  -5  135.69   17.00
  -6  -4  -5  149.59   20.20
  -6  -4  -5  113.29   19.30
   6   4   5   91.39   15.70
  -6   4  -5  135.29   15.30
  -6   4  -5  101.89   16.30
   6   4   5  145.19   18.20
  -7  -4  -5   -7.10   15.20
  -7  -4  -5   -5.50   13.00
   7  -4   5    6.00   13.40
  -7  -4  -5  -13.20   16.10
   7  -4   5    2.10   15.00
   7   4   5   -3.80   14.50
  -7   4  -5  -11.40   12.40
   7   4   5   -1.70   14.80
  -7   4  -5   -4.60    9.20
  -7   4  -5   10.00   14.00
   8  -4   5   80.49   17.10
  -8  -4  -5   72.09   21.00
   8  -4   5   68.39   15.40
  -8  -4  -5   71.99   21.20
  -8  -4  -5   74.39   16.40
   8   4   5   78.59   17.90
  -8   4  -5   80.19   11.70
  -8   4  -5   63.89   16.20
   8   4   5   81.79   17.90
  -8   4  -5   78.39   13.90
  -9  -4  -5  131.59   23.20
  -9  -4  -5  112.39   21.10
   9  -4   5  133.39   18.80
  -9  -4  -5  129.89   24.30
   9  -4   5  125.39   17.40
  -9   4  -5  143.39   15.60
  -9   4  -5  125.59   18.50
  -9   4  -5  103.49   18.00
   9   4   5  128.79   21.80
   9   4   5  127.09   20.70
 -10  -4  -5   69.89   18.20
 -10  -4  -5   81.49   26.90
  10  -4   5  110.29   18.00
  10  -4   5   64.99   18.10
 -10  -4  -5   94.99   26.00
  10   4   5   96.69   20.60
  10   4   5   95.19   22.60
 -10   4  -5   74.59   15.10
 -10   4  -5   97.29   20.20
 -10   4  -5   95.39   14.10
 -11  -5   5   28.60   18.70
  11  -5  -5   26.40   10.20
 -11  -5   5   12.70   16.70
  11   5  -5  -10.80   17.30
  11   5  -5    4.40   20.10
 -10  -5   5   35.70   17.90
  10  -5  -5   49.90   11.40
 -10  -5   5   41.00   19.20
  10   5  -5   36.40   17.80
  10   5  -5   38.50   20.10
  -9  -5   5  165.88   21.30
   9  -5  -5  122.29   15.20
  -9  -5   5   78.29   19.60
  -9  -5   5  156.28   22.00
   9   5  -5  142.09   21.80
   9   5  -5  118.29   20.20
  -9   5   5  157.58   17.30
   9   5  -5  103.09   19.70
   8  -5  -5   43.50    9.30
  -8  -5   5   58.89   17.80
   8  -5  -5   33.30   12.70
  -8  -5   5   57.49   17.30
  -8  -5   5   29.90   15.90
   8   5  -5   30.60   16.50
  -8   5   5   47.00   11.50
  -8   5   5   45.90   10.10
   8   5  -5   53.69   17.20
  -7  -5   5  138.29   18.60
  -7  -5   5  116.39   18.50
   7  -5  -5  119.19   13.00
   7  -5  -5  128.89   15.20
  -7  -5   5  106.79   18.40
   7   5  -5  111.29   17.60
   7   5  -5   93.09   18.90
   7   5  -5  115.59   18.00
  -6  -5   5   55.19   14.60
   6  -5  -5   62.09   12.70
   6  -5  -5   56.39    9.80
  -6  -5   5   52.99   16.30
  -6  -5   5   62.99   16.50
  -6   5   5   51.19   12.40
  -6   5   5   47.70   10.20
   6   5  -5   35.80   15.50
   6   5  -5   72.29   15.10
   6   5  -5   70.89   16.70
   5  -5  -5  -14.50   10.00
  -5  -5   5    7.10   12.70
  -5  -5   5   27.10   13.40
   5  -5  -5   17.80    8.80
   5   5  -5   17.10   14.10
   5   5  -5    8.50   14.10
  -5   5   5    5.50    9.20
   5   5  -5   10.50   12.80
  -5   5   5   16.70   10.10
   4  -5  -5  151.78   15.60
   4  -5  -5  149.29   16.20
  -4  -5   5  139.69   18.70
  -4  -5   5  144.99   18.00
   4   5  -5  174.98   20.80
  -4   5   5  152.98   15.60
   4   5  -5  145.49   17.60
   4   5  -5  174.48   20.00
  -3  -5   5  120.59   16.00
   3  -5  -5   95.89   10.30
   3  -5  -5  105.39   13.50
  -3  -5   5  118.49   17.30
   3  -5  -5  124.39   13.40
  -3   5   5  112.29   13.90
   3   5  -5  119.29   15.70
   3   5  -5  118.49   16.00
  -3   5   5  113.59   14.30
   3   5  -5  106.19   16.10
  -2  -5   5   51.69   14.70
  -2  -5   5   53.19   13.50
   2  -5  -5   27.40   11.70
   2  -5  -5   35.90   11.40
   2  -5  -5   22.90    8.30
   2   5  -5   34.30   13.90
   2   5  -5   28.80   12.80
  -2   5   5   41.10   12.40
  -2   5   5   29.00    9.70
   2   5  -5   24.60   11.80
   1  -5  -5   40.50   10.20
   1  -5  -5   40.30   12.30
  -1  -5   5   33.70   13.10
  -1  -5   5   42.00   14.50
   1   5  -5   50.29   12.90
   1   5  -5   28.00   13.90
   1   5  -5   45.70   11.30
  -1   5   5   28.20   10.50
  -1   5   5   31.30   11.20
   0  -5  -5   49.90   11.50
   0  -5   5   36.50   13.30
   0  -5  -5   73.49   13.50
   0  -5   5   46.80   14.30
   0   5  -5   66.39   13.50
   0   5   5   58.69   11.70
   0   5  -5   63.19   14.70
   0   5  -5   48.20   10.80
   1  -5   5  257.97   23.30
  -1  -5  -5  256.57   29.60
  -1  -5  -5  211.28   20.50
   1  -5   5  246.88   22.90
   1   5   5  247.38   22.10
  -1   5  -5  245.28   23.40
  -1   5  -5  239.38   16.80
  -1   5  -5  237.28   22.50
  -2  -5  -5  123.59   16.40
   2  -5   5  155.08   19.60
  -2  -5  -5  134.99   16.40
  -2  -5  -5  137.29   17.80
  -2   5  -5  157.78   18.70
   2   5   5  119.69   17.60
   2   5   5  148.69   17.00
   3  -5   5   93.79   17.40
  -3  -5  -5   87.69   15.60
  -3  -5  -5   92.89   16.60
  -3  -5  -5   94.49   17.30
   3   5   5   80.89   14.80
   3   5   5  114.19   16.30
  -3   5  -5   91.49   15.80
   4  -5   5  116.09   16.60
  -4  -5  -5  123.29   19.10
  -4  -5  -5   74.39   27.20
  -4   5  -5  108.79   15.70
   4   5   5  107.39   17.70
   4   5   5   83.19   15.40
  -5  -5  -5   74.29   17.20
  -5  -5  -5  100.69   18.10
  -5  -5  -5   93.19   17.70
   5  -5   5   94.89   15.70
   5  -5   5  102.99   15.80
   5   5   5  105.49   17.30
  -5   5  -5  100.19   14.90
  -5   5  -5   91.69   18.30
   5   5   5  123.29   18.40
  -6  -5  -5   -4.70   15.60
   6  -5   5   23.10   13.90
  -6  -5  -5   22.90   14.60
  -6  -5  -5   12.90   17.10
   6  -5   5   23.80   14.10
   6   5   5   12.80   15.10
  -6   5  -5   18.30   16.50
   6   5   5   31.80   16.30
  -7  -5  -5   15.60   14.60
  -7  -5  -5   36.70   25.90
   7  -5   5   35.70   16.90
   7   5   5   11.80   15.70
   7   5   5   56.69   17.90
  -7   5  -5   14.20   12.40
   8  -5   5    8.00   22.10
  -8  -5  -5    0.80   16.70
  -8  -5  -5    2.60   16.60
   8  -5   5  -15.40   13.90
  -8  -5  -5   -1.30   17.10
  -8   5  -5   -2.10   13.90
   8   5   5   33.10   18.10
  -8   5  -5  -29.30   15.50
  -7  -6   5   37.20   17.60
  -7  -6   5   32.70   28.40
  -7  -6   5   52.79   16.80
   7   6  -5   37.50   16.70
   7   6  -5   62.49   19.10
   7   6  -5   43.20   16.70
  -6  -6   5   96.89   19.70
   6  -6  -5   90.89   14.90
   6  -6  -5   91.19   13.70
  -6  -6   5  104.39   20.10
  -6  -6   5   83.39   16.50
   6   6  -5   88.99   18.20
  -6   6   5   73.39   12.50
   6   6  -5   60.09   17.80
   5  -6  -5   10.50   12.70
   5  -6  -5   19.30   10.30
  -5  -6   5   16.30   15.30
  -5  -6   5   43.10   16.90
  -5   6   5   -7.00   12.30
   5   6  -5    9.10   15.80
   5   6  -5    0.00   14.30
   5   6  -5    3.80   14.20
  -5   6   5    8.80    9.30
  -4  -6   5   14.80   16.00
  -4  -6   5    4.90   14.50
   4  -6  -5    4.30   11.70
   4  -6  -5   13.70   10.80
   4   6  -5   18.50   15.80
  -4   6   5    6.20   11.20
   4   6  -5    9.80   13.90
   4   6  -5   10.50   13.20
  -4   6   5   15.40   13.90
  -3  -6   5   16.30   14.50
   3  -6  -5   15.50   12.80
  -3  -6   5   34.90   15.90
   3  -6  -5   22.50   11.80
   3   6  -5    2.30   11.90
  -3   6   5    6.90   14.00
   3   6  -5   10.70   14.10
   3   6  -5   18.80   15.60
  -2  -6   5   64.69   16.40
   2  -6  -5   91.69   16.60
  -2  -6   5  161.08   22.90
   2  -6  -5  119.09   15.70
   2   6  -5  103.19   16.60
  -2   6   5  115.49   13.30
   2   6  -5  106.59   17.30
  -2   6   5  121.19   15.80
   2   6  -5   97.09   13.60
  -1  -6   5   71.39   23.60
   1  -6  -5   71.19   10.50
  -1  -6   5   80.19   16.80
   1  -6  -5   69.99   14.60
   1  -6  -5   67.89   17.00
  -1   6   5   65.79   12.70
   1   6  -5   78.59   11.00
   1   6  -5   59.89   16.50
  -1   6   5   44.10   14.60
   1   6  -5   69.09   15.50
   0  -6   5   10.70   14.00
   0  -6  -5   29.90   20.80
   0  -6  -5    1.20   13.60
   0  -6   5    8.90   14.60
   0  -6  -5   -0.60   10.10
   0   6  -5    7.60   13.00
   0   6  -5   23.90   15.50
   0   6   5   19.50   10.10
   1  -6   5   36.10   15.40
  -1  -6  -5   10.80   11.30
   1  -6   5   17.50   16.30
  -1  -6  -5   12.30   14.10
  -1   6  -5   34.00   15.60
   1   6   5   25.70   16.20
  -1   6  -5   15.20   12.90
  -2  -6  -5   30.30   16.00
   2  -6   5   36.10   15.20
  -2  -6  -5   30.10   13.10
  -2   6  -5   45.20   18.40
  -2   6  -5   36.00   12.70
   3  -6   5   75.89   16.70
   3  -6   5  123.09   18.00
  -3  -6  -5   68.69   18.80
  -3  -6  -5   52.89   17.80
  -3   6  -5  108.59   24.00
  -3   6  -5   70.99   14.40
   3   6   5   76.29   15.90
  -4  -6  -5   20.10   17.40
  -4  -6  -5   -9.60   14.20
   4  -6   5   30.90   17.30
  -4   6  -5   10.90   13.00
  -4   6  -5   12.30   15.00
   4   6   5   -3.20   13.40
 -17   0   6  -31.60   14.70
 -17   0   6   13.00   22.40
  17   0  -6   -7.90   36.70
 -17   0   6   11.20   14.40
  17   0  -6  -23.20   17.90
  16   0  -6   12.80   15.40
 -16   0   6   -9.20   14.50
 -16   0   6   -1.10   16.40
  16   0  -6   -2.20   18.80
 -16   0   6    5.70   13.10
  16   0  -6  -20.10   16.40
  15   0  -6  -37.50   15.80
 -15   0   6   -4.90   16.20
  15   0  -6   11.00   15.10
 -15   0   6  -12.30   14.00
 -15   0   6  -23.90   14.10
  15   0  -6    6.40   18.40
  14   0  -6    4.00   16.90
 -14   0   6   21.70   13.30
  14   0  -6    4.40   13.70
 -14   0   6   -6.30   14.90
 -14   0   6   25.80   14.50
  14   0  -6   -7.80   15.20
 -13   0   6   -8.30   14.50
 -13   0   6  -27.80   12.70
  13   0  -6   -4.80   12.70
  13   0  -6  -12.80   14.90
 -13   0   6    7.50   11.20
  13   0  -6  -22.10   13.10
  12   0  -6    7.30   15.00
  12   0  -6   -0.80   14.70
 -12   0   6   18.00   10.60
 -12   0   6   19.00   13.20
 -12   0   6    9.30   13.20
  12   0  -6   21.90   12.50
 -11   0   6   97.99   13.10
 -11   0   6   91.19   11.60
  11   0  -6  113.19   13.50
  11   0  -6   91.59   16.20
  11   0  -6   71.69   12.90
 -11   0   6   92.29   15.50
 -10   0   6   47.30   10.60
 -10   0   6   67.29    9.50
  10   0  -6   70.69   11.10
  10   0  -6   62.39   14.40
 -10   0   6   54.59   13.40
  10   0  -6   67.29   10.80
  -9   0   6  112.39   11.80
   9   0  -6  117.79   15.60
   9   0  -6   95.39   11.40
  -9   0   6  114.49   11.50
   9   0  -6  121.99   11.80
  -9   0   6  110.69   14.60
   8   0  -6   45.20   12.50
  -8   0   6   31.50    7.20
   8   0  -6   34.60    8.10
  -8   0   6   27.60    8.20
   8   0  -6   23.40    8.00
  -8   0   6   28.30   10.80
   7   0  -6   -2.60   10.10
  -7   0   6   -6.40    6.90
  -7   0   6    4.60   10.30
   7   0  -6   -2.20    6.60
   7   0  -6    5.90    6.90
  -6   0   6  842.62   41.30
   6   0  -6  820.82   41.20
   6   0  -6  812.12   43.80
  -6   0   6  824.02   43.80
   5   0  -6  481.65   25.50
   5   0  -6  510.05   29.30
   5   0  -6  479.45   25.70
  -5   0   6  504.75   26.00
  -4   0   6  674.13   34.20
   4   0  -6  671.63   33.90
   4   0  -6  688.33   37.00
  -3   0   6  267.57   19.40
  -3   0   6  293.37   16.30
   3   0  -6  297.77   16.20
   3   0  -6  269.27   16.50
  -2   0   6   21.10    6.60
   2   0  -6   21.00    5.80
   2   0  -6   23.50    6.20
  -2   0   6   23.80    6.00
   1   0  -6  541.05   28.50
  -1   0   6  552.64   28.60
  -1   0   6  550.04   28.30
   1   0  -6  532.25   28.20
   0   0   6 2490.65  117.99
   0   0  -6 2464.95  117.99
   0   0  -6 2427.96  117.79
   0   0   6 2410.46  117.89
   1   0   6   11.90    7.80
   1   0   6   27.00    8.50
  -1   0  -6   32.80    8.80
  -1   0  -6   17.90    7.50
   2   0   6  694.93   37.20
   2   0   6  682.63   38.70
  -2   0  -6  730.13   43.50
  -2   0  -6  743.23   37.30
  -3   0  -6 1021.10   51.19
   3   0   6  982.50   51.49
   3   0   6  995.40   51.19
  -3   0  -6 1031.50   51.49
   4   0   6  180.08   17.00
  -4   0  -6  204.48   17.10
   4   0   6  187.68   18.20
  -4   0  -6  194.48   17.90
  -5   0  -6   56.09   11.60
   5   0   6   45.50   11.50
  -5   0  -6   49.20   12.10
   5   0   6   53.59   10.50
  -5   0  -6   53.09   10.60
  -6   0  -6  154.18   18.90
  -6   0  -6  159.88   17.50
   6   0   6  174.58   17.40
   6   0   6  150.88   18.50
  -6   0  -6  144.19   18.50
  -7   0  -6  114.69   15.20
  -7   0  -6   98.29   13.60
   7   0   6  101.89   13.90
  -7   0  -6  128.59   16.00
   7   0   6   89.69   14.90
  -8   0  -6   42.30   13.80
   8   0   6   40.00   13.00
   8   0   6   33.90   14.10
  -8   0  -6   58.09   14.70
  -8   0  -6   66.09   13.00
  -9   0  -6   72.39   15.30
  -9   0  -6   75.29   14.20
   9   0   6   75.19   15.50
 -10   0  -6  135.99   18.60
  10   0   6  144.59   18.80
 -10   0  -6  110.99   16.40
 -10   0  -6  102.29   17.90
  10   0   6  110.69   18.30
 -11   0  -6   39.20   16.60
  11   0   6   41.50   16.20
 -11   0  -6   10.30   14.80
 -11   0  -6   14.90   16.50
  11   0   6   37.00   16.90
  12   0   6  -17.70   16.60
 -12   0  -6    2.30   15.00
 -12   0  -6  -19.50   15.90
  12   0   6   -7.00   16.50
 -12   0  -6  -13.40   18.20
  13   0   6   -5.70   17.90
 -13   0  -6   -8.40   17.50
 -13   0  -6  -16.60   15.40
  13   0   6   -6.70   18.40
 -17  -1   6  -12.70   15.80
  17  -1  -6   16.30   17.80
  17  -1  -6   -0.10   19.10
 -17  -1   6   -9.20   16.90
  17   1  -6   15.60   20.00
  17   1  -6    3.80   17.90
 -17   1   6    7.90   19.40
  16  -1  -6   11.00   18.70
 -16  -1   6    7.50   17.70
 -16  -1   6   -8.90   19.70
 -16  -1   6   17.70   13.00
  16  -1  -6   18.50   23.10
  16  -1  -6   19.40   16.60
  16   1  -6    2.40   19.20
  16   1  -6   26.40   18.60
 -16   1   6   11.10   13.70
 -16   1   6   -1.50   23.80
 -15  -1   6   56.49   16.60
  15  -1  -6   88.79   25.10
 -15  -1   6   65.69   18.80
 -15  -1   6   84.89   14.70
  15  -1  -6   68.49   20.00
 -15   1   6   52.49   14.40
 -15   1   6   56.49   16.20
  15   1  -6   57.79   17.80
  15   1  -6   83.79   21.70
 -15   1   6   53.49   17.50
  15   1  -6   83.79   20.50
 -14  -1   6  119.99   19.30
  14  -1  -6  114.59   15.40
 -14  -1   6   89.29   14.80
  14  -1  -6  121.69   17.30
  14  -1  -6  110.49   20.20
 -14  -1   6   64.39   16.20
  14   1  -6  100.09   21.50
 -14   1   6  101.09   17.80
  14   1  -6   90.59   17.50
 -14   1   6   89.09   17.70
  14   1  -6  128.89   28.10
 -14   1   6   92.19   14.60
 -13  -1   6  106.69   18.80
  13  -1  -6  127.69   20.00
 -13  -1   6  109.19   14.80
  13  -1  -6  169.28   20.20
  13  -1  -6  116.59   14.80
 -13  -1   6   92.49   15.90
  13   1  -6  117.19   17.10
 -13   1   6  134.49   15.20
 -13   1   6  116.69   14.20
  13   1  -6   93.09   19.80
  13   1  -6   97.89   16.90
 -13   1   6  100.29   19.80
  12  -1  -6  197.68   20.40
 -12  -1   6  159.78   20.70
 -12  -1   6  192.38   18.40
  12  -1  -6  204.68   20.50
  12  -1  -6  179.18   22.70
 -12  -1   6  179.88   18.50
  12   1  -6  180.48   20.70
  12   1  -6  172.18   22.60
 -12   1   6  216.28   16.30
  12   1  -6  202.98   21.00
 -12   1   6  183.28   22.10
 -12   1   6  187.78   18.30
  11  -1  -6  161.48   21.00
 -11  -1   6  207.68   17.40
 -11  -1   6  176.68   19.20
 -11  -1   6  186.88   21.80
  11  -1  -6  176.08   18.70
  11  -1  -6  131.49   16.30
  11   1  -6  165.08   19.40
 -11   1   6  190.48   15.00
 -11   1   6  184.28   20.60
  11   1  -6  178.08   21.60
 -11   1   6  193.58   16.40
  11   1  -6  165.08   22.80
 -10  -1   6  812.92   42.60
 -10  -1   6  780.82   45.20
 -10  -1   6  781.52   43.00
  10  -1  -6  893.31   43.60
  10  -1  -6  760.02   41.80
  10  -1  -6  773.22   44.60
 -10   1   6  836.52   44.70
 -10   1   6  858.51   41.00
  10   1  -6  762.72   43.60
  10   1  -6  778.22   45.90
  10   1  -6  785.82   43.20
 -10   1   6  871.81   41.40
   9  -1  -6 1550.14   78.19
   9  -1  -6 1731.53   77.69
   9  -1  -6 1474.95   75.79
  -9  -1   6 1519.75   77.09
  -9  -1   6 1507.65   76.69
  -9  -1   6 1515.75   78.89
   9   1  -6 1595.54   77.29
  -9   1   6 1588.64   75.49
  -9   1   6 1569.54   78.29
   9   1  -6 1532.55   79.49
   9   1  -6 1443.06   77.59
  -9   1   6 1646.84   75.59
  -8  -1   6  498.25   28.30
   8  -1  -6  501.85   25.90
  -8  -1   6  495.55   30.20
  -8  -1   6  507.75   27.50
   8  -1  -6  483.65   29.50
   8   1  -6  514.45   31.20
   8   1  -6  499.65   28.30
  -8   1   6  455.05   29.30
   8   1  -6  512.35   28.80
   7  -1  -6  548.85   31.30
  -7  -1   6  585.24   30.40
  -7  -1   6  554.84   32.40
   7   1  -6  532.65   30.50
   7   1  -6  559.44   30.10
   7   1  -6  528.35   32.70
  -6  -1   6  266.27   18.00
  -6  -1   6  237.78   19.80
   6  -1  -6  250.67   19.00
   6   1  -6  229.28   20.30
   6   1  -6  246.78   17.10
  -5  -1   6 2210.68  101.29
  -5  -1   6 2084.39  102.39
   5  -1  -6 2082.29  101.99
  -5  -1   6 2191.28  101.39
   5   1  -6 2042.30  102.69
   5   1  -6 2018.20  101.09
   5   1  -6 1990.30  101.09
  -4  -1   6 1500.15   72.19
  -4  -1   6 1561.74   72.59
   4   1  -6 1412.46   73.49
   4   1  -6 1433.06   72.19
   4   1  -6 1476.05   72.19
   3  -1  -6  284.07   15.50
  -3  -1   6  277.87   18.80
  -3  -1   6  281.57   18.20
   3   1  -6  333.17   19.50
   3   1  -6  295.17   18.00
   3   1  -6  276.57   20.60
  -2  -1   6 2173.08  105.69
  -2  -1   6 2229.68  105.79
   2  -1  -6 2271.27  104.99
   2  -1  -6 2221.98  104.89
  -2   1   6 2189.68  104.79
  -2   1   6 2128.29  104.89
   2   1  -6 2120.89  105.69
   2   1  -6 2167.88  105.69
  -1  -1   6  365.06   20.50
  -1  -1   6  411.96   21.20
   1  -1  -6  339.27   20.00
   1  -1  -6  304.97   19.60
   1   1  -6  359.66   20.40
   1   1  -6  351.26   21.20
  -1   1   6  290.77   23.50
  -1   1   6  316.47   19.40
   0  -1  -6 2376.96  116.89
   0  -1   6 2559.44  120.29
   0  -1  -6 2542.95  116.99
   0  -1   6 2312.27  117.09
   0   1   6 2257.27  116.69
   0   1   6 2451.75  116.89
   0   1  -6 2536.35  118.29
   0   1  -6 2381.56  117.09
   1  -1   6  851.11   43.40
   1  -1   6  848.12   43.10
  -1  -1  -6  870.51   43.40
  -1  -1  -6  824.62   43.00
  -1   1  -6  847.02   43.10
  -1   1  -6  854.31   43.40
   1   1   6  830.42   43.20
   1   1   6  815.62   42.90
   2  -1   6  613.44   33.10
  -2  -1  -6  598.84   33.20
  -2  -1  -6  645.74   33.80
   2  -1   6  592.94   33.20
  -2   1  -6  624.24   32.90
   2   1   6  592.04   33.10
   2   1   6  629.24   33.60
  -2   1  -6  626.94   33.40
   3  -1   6  145.89   14.80
  -3  -1  -6  142.49   14.90
  -3  -1  -6  145.29   16.90
   3  -1   6  158.78   15.60
  -3   1  -6  147.69   14.40
  -3   1  -6  155.68   15.50
   3   1   6  156.28   15.40
   3   1   6  130.29   16.10
  -4  -1  -6  259.07   19.40
  -4  -1  -6  192.18   17.70
   4  -1   6  212.38   17.80
   4  -1   6  206.48   17.70
   4   1   6  206.38   17.80
  -4   1  -6  232.08   17.00
   4   1   6  218.68   18.60
  -4   1  -6  210.38   18.30
  -5  -1  -6  187.98   19.60
  -5  -1  -6  255.97   20.00
   5  -1   6  189.28   18.50
   5  -1   6  215.08   17.90
  -5  -1  -6  206.18   18.20
  -5   1  -6  212.98   17.60
  -5   1  -6  198.68   18.80
   5   1   6  214.78   18.40
   5   1   6  185.58   18.90
   6  -1   6  229.08   21.20
  -6  -1  -6  259.87   23.00
  -6  -1  -6  262.77   22.10
   6  -1   6  269.67   20.90
  -6  -1  -6  257.17   20.90
  -6   1  -6  253.97   21.40
  -6   1  -6  280.77   20.50
  -6   1  -6  275.97   21.50
   6   1   6  243.28   21.00
   6   1   6  250.37   21.80
  -7  -1  -6  289.67   24.10
  -7  -1  -6  240.68   22.30
   7  -1   6  241.48   23.00
  -7  -1  -6  283.07   24.00
   7  -1   6  265.87   22.30
  -7   1  -6  276.17   22.10
   7   1   6  283.57   22.90
   7   1   6  251.87   23.30
  -7   1  -6  289.67   23.20
  -7   1  -6  315.57   23.40
  -8  -1  -6   69.69   15.50
  -8  -1  -6   54.09   13.00
   8  -1   6   53.29   14.60
   8  -1   6   40.90   13.30
  -8  -1  -6   76.69   16.60
   8   1   6   71.89   14.00
   8   1   6   49.10   14.50
  -8   1  -6   79.19   15.30
  -8   1  -6   63.99   13.30
  -8   1  -6   48.80   14.80
  -9  -1  -6   52.19   13.80
  -9  -1  -6   63.69   20.30
   9  -1   6   60.39   14.80
  -9  -1  -6   68.19   21.40
   9  -1   6   62.59   15.60
  -9   1  -6   47.50   14.70
   9   1   6   77.59   15.90
   9   1   6   53.49   17.20
  -9   1  -6   47.20   13.50
  -9   1  -6   56.39   14.90
 -10  -1  -6   81.39   15.40
  10  -1   6  109.49   18.10
  10  -1   6  130.89   17.80
 -10  -1  -6  112.89   18.90
 -10  -1  -6   79.19   17.70
 -10   1  -6  130.29   17.90
  10   1   6  124.29   18.30
 -10   1  -6  112.39   16.40
 -10   1  -6  100.19   17.50
  10   1   6  102.79   17.70
 -11  -1  -6   53.09   17.60
 -11  -1  -6   49.60   15.10
  11  -1   6   57.49   16.90
  11   1   6   38.90   17.50
 -11   1  -6   54.69   15.50
 -11   1  -6   56.79   16.40
 -11   1  -6   21.00   16.20
  11   1   6   56.89   18.00
 -12  -1  -6    1.20   16.10
 -12  -1  -6  -11.40   16.80
  12  -1   6   13.50   17.30
 -12  -1  -6    3.80   20.10
  12  -1   6    6.10   16.30
  12   1   6   -6.60   17.50
  12   1   6   15.40   23.50
 -12   1  -6   18.50   14.90
 -12   1  -6   -0.20   16.50
 -12   1  -6    1.30   15.90
 -13  -1  -6   23.20   22.90
 -13  -1  -6   23.10   16.30
  13  -1   6    6.90   18.90
  13  -1   6   44.80   24.70
 -13  -1  -6   14.10   23.30
 -13   1  -6    3.90   15.30
 -13   1  -6   11.80   17.30
  13   1   6   13.50   17.20
 -13   1  -6   19.40   19.40
  13   1   6   -2.00   19.50
  16  -2  -6   -9.90   17.70
 -16  -2   6   -0.60   18.70
  16  -2  -6   -4.00   13.00
 -16  -2   6    8.10   17.40
  16   2  -6  -25.80   17.30
 -16   2   6   -4.10   17.20
  16   2  -6   16.10   18.30
 -16   2   6   -3.90   11.10
  16   2  -6  -16.80   18.30
 -15  -2   6   22.30   17.20
  15  -2  -6   23.20   12.70
  15  -2  -6   56.19   18.80
 -15  -2   6   16.20   16.40
 -15  -2   6   23.30   16.60
  15   2  -6   34.10   21.50
  15   2  -6   38.50   18.00
  15   2  -6   21.00   17.60
 -15   2   6   31.40   17.40
 -15   2   6   29.60   11.20
 -14  -2   6   -5.30   14.90
 -14  -2   6   10.70   16.10
  14  -2  -6    4.70   11.00
  14  -2  -6   -6.50   12.10
  14  -2  -6    5.20   18.90
 -14   2   6    9.00   11.90
 -14   2   6  -11.60    9.90
  14   2  -6   24.50   19.40
 -14   2   6   -6.20   19.20
  14   2  -6   12.60   18.70
  14   2  -6    1.30   17.50
  13  -2  -6   30.80   11.50
 -13  -2   6   34.50   17.20
  13  -2  -6   53.39   10.40
 -13  -2   6   54.69   22.60
 -13  -2   6   27.60   15.00
  13  -2  -6   45.60   16.20
  13   2  -6   32.30   15.90
 -13   2   6   43.10   11.90
  13   2  -6   19.90   18.70
 -13   2   6    3.30   14.80
 -13   2   6   25.40   17.50
  13   2  -6   17.60   23.80
  12  -2  -6   14.70   11.40
 -12  -2   6   13.10   14.80
 -12  -2   6  -13.30   13.50
  12  -2  -6   -6.70   13.30
  12   2  -6   -0.50   13.70
  12   2  -6   15.80   17.10
 -12   2   6   10.40    8.60
 -12   2   6   -4.50    7.80
 -12   2   6  -32.10   13.30
  12   2  -6   -0.90   14.10
 -11  -2   6   22.30   16.00
 -11  -2   6   59.39   13.60
  11  -2  -6   68.89   10.10
  11  -2  -6   49.20   13.80
 -11  -2   6   57.39   13.40
  11   2  -6   48.10   13.90
  11   2  -6   39.90   14.20
 -11   2   6   42.00   14.10
  11   2  -6   39.10   16.40
 -11   2   6   58.09    7.90
 -10  -2   6   70.09   14.80
  10  -2  -6  103.29   14.10
  10  -2  -6  100.99   11.70
 -10  -2   6   98.09   14.20
 -10  -2   6  122.69   13.90
 -10   2   6  100.79    9.40
  10   2  -6  107.59   14.70
  10   2  -6   76.69   16.90
  10   2  -6  109.29   16.40
  -9  -2   6   43.90   12.10
  -9  -2   6   57.79   13.20
   9  -2  -6   44.60   11.10
  -9  -2   6   59.19   11.40
   9   2  -6   48.00   14.80
   9   2  -6   36.90   11.90
   9   2  -6   39.60   12.00
  -8  -2   6  181.78   16.00
   8  -2  -6  156.38   15.60
  -8  -2   6  181.58   17.90
  -8  -2   6  173.78   19.50
   8   2  -6  182.58   21.50
   8   2  -6  156.48   17.70
   8   2  -6  154.48   16.90
  -7  -2   6  316.77   23.20
  -7  -2   6  316.87   22.10
   7  -2  -6  329.37   20.70
   7   2  -6  291.67   21.30
   7   2  -6  297.97   23.70
  -6  -2   6 1196.18   56.29
  -6  -2   6 1122.19   57.49
   6  -2  -6 1114.59   55.69
  -6  -2   6 1137.89   56.59
   6   2  -6 1063.79   55.99
   6   2  -6 1085.19   56.09
   6   2  -6 1041.30   57.69
  -5  -2   6  359.66   23.50
  -5  -2   6  402.76   22.90
   5  -2  -6  321.97   21.50
  -5  -2   6  387.86   23.40
   5   2  -6  330.77   22.00
   5   2  -6  357.66   22.50
   5   2  -6  344.57   24.00
  -4  -2   6  578.94   31.80
  -4  -2   6  537.45   31.70
  -4  -2   6  592.24   31.20
   4   2  -6  563.04   30.90
   4   2  -6  567.84   32.70
   4   2  -6  559.24   31.20
  -3  -2   6  285.77   20.00
   3   2  -6  333.77   20.10
   3   2  -6  313.27   21.20
  -2  -2   6 1683.33   83.49
   2  -2  -6 1824.62   82.29
   2  -2  -6 1715.33   82.09
  -2  -2   6 1730.93   83.49
   2   2  -6 1663.93   83.69
  -2   2   6 1727.03   81.99
   2   2  -6 1676.53   83.39
  -2   2   6 1622.34   82.09
   2   2  -6 1668.43   83.79
  -1  -2   6 1264.57   60.89
   1  -2  -6 1162.78   59.59
  -1  -2   6 1188.98   60.69
   1  -2  -6 1296.27   60.09
   1   2  -6 1196.38   60.59
   1   2  -6 1230.48   61.09
  -1   2   6 1178.88   59.59
   1   2  -6 1219.68   60.89
   0  -2   6  129.39   13.10
   0  -2  -6   54.09    9.00
   0  -2  -6   80.29   10.40
   0  -2   6   76.99    9.60
   0   2  -6   79.79   10.50
   0   2  -6  103.39   12.40
   0   2   6   92.19   11.80
   0   2   6   74.29    9.20
  -1  -2  -6  455.25   27.20
   1  -2   6  511.05   28.00
  -1  -2  -6  532.55   28.10
   1  -2   6  462.95   27.50
  -1   2  -6  475.45   27.90
   1   2   6  493.75   27.40
  -1   2  -6  488.55   27.50
   1   2   6  484.35   27.10
  -2  -2  -6  577.84   31.40
   2  -2   6  582.24   30.70
   2  -2   6  563.14   30.40
  -2  -2  -6  519.05   30.40
   2   2   6  553.54   30.60
  -2   2  -6  516.95   30.90
   2   2   6  531.75   30.30
  -2   2  -6  555.54   30.50
  -3  -2  -6  631.04   36.20
   3  -2   6  650.13   34.50
  -3  -2  -6  712.23   37.90
   3  -2   6  641.14   34.80
  -3  -2  -6  586.74   34.30
   3   2   6  642.94   34.80
  -3   2  -6  621.14   34.80
  -3   2  -6  632.94   34.50
   3   2   6  604.84   35.10
  -4  -2  -6  176.78   17.10
   4  -2   6  181.18   17.30
   4  -2   6  182.08   17.00
  -4  -2  -6  202.68   19.50
  -4  -2  -6  159.58   19.30
   4   2   6  171.68   17.20
  -4   2  -6  204.08   16.80
   4   2   6  198.58   18.10
  -4   2  -6  196.18   18.20
  -5  -2  -6  233.58   20.70
   5  -2   6  303.97   20.80
  -5  -2  -6  276.67   23.00
  -5  -2  -6  262.77   23.10
   5  -2   6  265.17   20.90
  -5   2  -6  272.07   21.60
  -5   2  -6  300.07   20.40
   5   2   6  272.17   21.50
   5   2   6  251.07   21.80
  -6  -2  -6   12.80   11.00
   6  -2   6   38.50   11.20
  -6  -2  -6   13.40   13.50
  -6  -2  -6   39.00   14.30
   6  -2   6   19.80   11.30
   6   2   6   13.80   12.00
   6   2   6   11.90   11.80
  -6   2  -6   32.60   11.90
  -6   2  -6   26.90   10.40
  -6   2  -6   28.70   10.70
  -7  -2  -6   32.30   12.20
  -7  -2  -6   15.30   14.80
  -7  -2  -6   39.70   16.40
   7  -2   6   26.90   12.10
  -7   2  -6   35.20   12.20
   7   2   6   25.50   13.00
   7   2   6   49.20   13.90
  -7   2  -6   45.10   16.30
  -7   2  -6   47.20   12.40
   8  -2   6   31.50   13.70
  -8  -2  -6   20.80   13.10
  -8  -2  -6   16.60   14.40
   8  -2   6   44.90   13.20
  -8  -2  -6   22.20   16.30
  -8   2  -6   30.30   13.20
  -8   2  -6   37.70   12.80
   8   2   6   30.50   14.50
   8   2   6   37.10   15.40
  -8   2  -6   27.30   13.10
  -9  -2  -6   47.70   14.60
   9  -2   6   58.99   14.50
  -9  -2  -6   50.19   17.40
   9  -2   6   41.40   15.50
  -9   2  -6   42.00   14.80
   9   2   6   62.19   17.00
  -9   2  -6   40.20   13.80
   9   2   6   65.29   18.90
  -9   2  -6   53.59   15.40
 -10  -2  -6   29.40   17.00
  10  -2   6   33.30   15.50
 -10  -2  -6   34.90   18.40
  10   2   6   28.60   20.80
  10   2   6   21.30   16.00
 -10   2  -6   34.70   14.20
 -10   2  -6   48.50   17.80
 -10   2  -6   14.60   14.80
  11  -2   6   62.99   17.80
  11  -2   6   96.19   18.10
 -11  -2  -6   54.39   19.40
 -11  -2  -6  100.69   17.50
 -11  -2  -6   84.39   21.00
 -11   2  -6   68.19   17.50
  11   2   6   71.99   18.50
 -11   2  -6   57.19   15.40
  11   2   6   50.59   20.00
 -11   2  -6   47.70   16.20
 -12  -2  -6  -10.90   15.00
 -12  -2  -6  -22.90   18.90
  12  -2   6   -4.30   16.80
 -12  -2  -6  -31.70   17.50
  12   2   6   -2.40   17.90
 -12   2  -6  -19.00   16.30
 -12   2  -6   -6.30   15.30
  12   2   6  -19.50   17.70
  15  -3  -6   44.80   12.70
 -15  -3   6   -1.60   17.60
 -15  -3   6    7.10   16.70
  15  -3  -6   19.00   15.40
 -15  -3   6   28.70   20.40
  15   3  -6   14.70   20.40
  15   3  -6  -10.30   18.70
  15   3  -6   54.89   20.30
  14  -3  -6   54.39   14.70
 -14  -3   6   42.90   20.10
 -14  -3   6   42.30   18.70
 -14  -3   6   55.59   17.60
  14  -3  -6   44.50   11.60
  14   3  -6   59.49   19.30
  14   3  -6   40.00   21.50
  14   3  -6   29.70   18.00
 -13  -3   6   64.49   18.20
  13  -3  -6   93.09   13.20
 -13  -3   6   78.79   19.50
 -13  -3   6   80.69   20.30
  13  -3  -6   85.39   15.30
  13   3  -6   53.59   18.50
  13   3  -6   83.79   18.10
  13   3  -6   73.69   19.30
 -12  -3   6   55.99   19.10
 -12  -3   6   32.70   16.30
  12  -3  -6   65.49   13.90
 -12  -3   6   25.80   15.80
  12   3  -6   73.39   17.90
  12   3  -6   40.00   19.80
  12   3  -6   51.39   16.50
 -11  -3   6   79.99   16.50
 -11  -3   6   91.69   16.60
  11  -3  -6  111.09   12.40
  11  -3  -6  118.49   16.80
 -11  -3   6   97.29   16.10
  11   3  -6   78.29   16.70
  11   3  -6   55.79   17.60
  11   3  -6   69.19   17.10
 -10  -3   6   90.49   15.40
  10  -3  -6  104.59   14.90
 -10  -3   6   66.29   15.50
 -10  -3   6   61.49   17.50
  10   3  -6   74.69   15.60
  10   3  -6   86.49   19.70
  10   3  -6   54.89   15.40
   9  -3  -6  491.15   26.00
  -9  -3   6  433.36   37.80
   9   3  -6  404.76   29.30
   9   3  -6  374.06   38.60
  -8  -3   6  142.79   20.90
  -8  -3   6  141.39   16.40
   8  -3  -6  179.08   14.20
   8   3  -6  134.49   18.70
   8   3  -6  135.69   16.40
  -7  -3   6   99.59   15.70
   7  -3  -6  105.69   12.40
  -7  -3   6  145.89   15.50
  -7  -3   6   99.49   14.70
   7   3  -6  100.69   14.10
   7   3  -6  128.99   17.60
  -6  -3   6  110.29   14.70
   6  -3  -6   90.19   10.70
  -6  -3   6  104.59   13.50
  -6  -3   6   81.99   13.60
   6   3  -6   96.89   15.60
   6   3  -6  106.79   13.30
   6   3  -6   77.59   11.90
  -5  -3   6  132.69   15.80
  -5  -3   6   86.99   13.20
  -5  -3   6  125.49   14.30
   5  -3  -6   94.19   10.80
   5   3  -6  100.99   14.30
   5   3  -6   76.49   12.40
   5   3  -6   96.39   12.10
  -4  -3   6  317.07   22.40
   4  -3  -6  274.07   16.30
   4  -3  -6  289.37   17.20
  -4  -3   6  316.17   21.40
  -4  -3   6  314.07   21.40
   4   3  -6  313.07   22.40
   4   3  -6  284.47   20.90
   4   3  -6  305.37   21.60
  -3  -3   6  236.68   18.80
  -3  -3   6  229.48   19.70
   3  -3  -6  219.08   15.60
   3   3  -6  231.18   18.40
  -3   3   6  242.58   14.80
   3   3  -6  281.57   19.50
   3   3  -6  230.18   19.30
  -2  -3   6  532.75   30.50
   2  -3  -6  555.54   29.10
   2  -3  -6  535.95   28.10
  -2   3   6  529.75   28.30
   2   3  -6  584.44   30.70
   2   3  -6  486.95   30.50
  -1  -3   6  212.98   17.70
  -1  -3   6  202.88   17.20
   1  -3  -6  187.18   14.90
   1  -3  -6  195.98   16.20
   1   3  -6  213.78   19.10
   1   3  -6  216.98   17.00
  -1   3   6  198.78   14.70
   1   3  -6  200.88   17.20
   0  -3   6  206.38   17.10
   0  -3  -6  166.98   15.70
   0  -3  -6  204.18   17.00
   0  -3   6  190.38   17.20
   0   3  -6  216.28   16.00
   0   3  -6  225.48   17.10
   0   3   6  181.28   15.00
   0   3   6  192.78   15.80
   0   3  -6  172.28   18.70
   1  -3   6   95.09   11.60
  -1  -3  -6   83.89   11.30
  -1  -3  -6   98.99   12.60
  -1  -3  -6  118.79   13.10
   1  -3   6  113.99   12.10
   1   3   6  105.59   11.90
  -1   3  -6  107.79   11.80
  -1   3  -6  113.39   13.50
  -1   3  -6   99.69   13.10
   1   3   6   77.79   11.10
  -2  -3  -6  203.08   18.50
  -2  -3  -6  199.18   19.60
   2  -3   6  209.78   17.30
   2  -3   6  178.78   17.60
  -2  -3  -6  173.48   17.20
  -2   3  -6  202.18   17.00
  -2   3  -6  187.28   18.40
   2   3   6  167.28   16.80
   2   3   6  189.58   17.90
  -3  -3  -6   27.10   11.30
  -3  -3  -6   23.70   10.30
   3  -3   6   31.20   10.00
   3  -3   6   29.00   10.60
  -3  -3  -6   38.00   12.20
  -3   3  -6   24.90   11.30
  -3   3  -6   33.10   10.00
   3   3   6   24.00   10.40
   3   3   6   24.60   11.10
  -4  -3  -6   30.00   11.40
   4  -3   6   46.60   11.20
   4  -3   6   26.40   11.10
  -4  -3  -6   36.60   13.50
  -4  -3  -6   34.10   14.00
  -4   3  -6   40.90   12.00
  -4   3  -6   46.50   11.00
   4   3   6   37.60   11.80
   4   3   6   36.30   12.30
  -5  -3  -6   92.59   16.70
   5  -3   6   87.69   12.80
  -5  -3  -6   74.59   15.60
  -5  -3  -6   97.49   14.20
   5   3   6   94.99   15.00
  -5   3  -6   91.09   12.90
   5   3   6   68.99   14.00
  -5   3  -6  110.29   18.40
  -6  -3  -6    0.60   14.70
  -6  -3  -6  -13.30   14.10
  -6  -3  -6    7.80   19.40
   6  -3   6   -2.60   11.60
   6  -3   6    5.70   11.10
  -6   3  -6    8.80   12.50
   6   3   6  -13.80   13.20
  -6   3  -6   -3.10    9.70
   6   3   6   -5.50   17.50
  -6   3  -6    4.30   11.00
  -7  -3  -6   84.69   15.00
   7  -3   6  107.99   15.20
  -7  -3  -6   71.59   17.90
   7  -3   6   82.09   15.60
  -7  -3  -6   78.79   17.70
  -7   3  -6   97.79   15.40
   7   3   6   94.09   17.00
   7   3   6  101.19   17.10
  -7   3  -6   98.99   14.00
  -7   3  -6  131.19   16.80
  -8  -3  -6   18.00   17.60
   8  -3   6   11.90   13.50
  -8  -3  -6   -3.30   16.60
   8  -3   6   32.10   13.50
  -8  -3  -6   -2.30   13.00
   8   3   6    0.30   15.40
  -8   3  -6    6.40   12.30
  -8   3  -6   34.70   14.20
  -8   3  -6   15.50   12.40
   8   3   6   13.60   15.60
  -9  -3  -6    2.30   13.80
  -9  -3  -6   -6.90   17.20
   9  -3   6    7.90   20.00
  -9  -3  -6   35.40   22.90
   9  -3   6   20.70   14.40
  -9   3  -6   10.40   13.70
  -9   3  -6   -9.10   13.00
  -9   3  -6   11.70   15.00
   9   3   6    2.90   16.60
   9   3   6   53.19   29.60
 -10  -3  -6   40.60   16.00
  10  -3   6   34.10   16.20
  10  -3   6   35.10   15.70
 -10  -3  -6   22.80   17.50
 -10  -3  -6   38.90   19.70
 -10   3  -6   18.60   14.70
  10   3   6   42.70   17.90
 -10   3  -6   24.70   13.70
  10   3   6   45.00   19.60
 -10   3  -6   22.10   15.90
 -11  -3  -6   -1.40   19.10
 -11  -3  -6  -24.60   15.10
 -11  -3  -6   25.60   28.40
  11  -3   6    2.80   15.90
 -11   3  -6   12.50   18.50
 -11   3  -6    7.90   19.60
  11   3   6   23.50   21.20
  11   3   6   27.20   19.30
 -11   3  -6   -3.80   16.00
 -13  -4   6  117.29   18.70
 -13  -4   6  106.09   45.20
  13   4  -6   86.09   20.50
 -12  -4   6   83.19   19.40
 -12  -4   6   67.49   18.80
  12  -4  -6   62.09   10.70
 -12  -4   6   54.99   18.90
  12  -4  -6   79.29   11.50
  12   4  -6   36.50   18.70
  12   4  -6   56.79   18.70
 -11  -4   6    3.10   16.00
  11   4  -6  -10.40   16.30
  11   4  -6   -2.80   18.30
  10  -4  -6  152.18   16.00
 -10  -4   6  149.09   20.80
 -10  -4   6  151.28   20.70
  10   4  -6  133.89   19.60
  10   4  -6  174.88   24.10
  -9  -4   6   58.19   16.50
  -9  -4   6   70.29   17.50
   9   4  -6   40.30   17.00
   9   4  -6   44.80   15.80
   8  -4  -6  147.69   11.80
  -8  -4   6  150.98   18.80
  -8  -4   6  163.58   19.60
  -8  -4   6  171.48   21.20
   8   4  -6  140.19   18.50
   8   4  -6  160.48   19.00
   8   4  -6  163.18   23.40
   7  -4  -6    6.30    6.50
  -7  -4   6    5.20   14.00
  -7  -4   6   21.10   13.30
   7   4  -6    7.00   15.60
   7   4  -6   30.80   12.70
   7   4  -6   13.00   13.70
   6  -4  -6   52.19    6.90
  -6  -4   6   24.10   13.50
   6  -4  -6   23.80    8.80
  -6  -4   6   32.80   13.80
  -6  -4   6   40.10   14.50
   6  -4  -6   48.00    7.70
   6   4  -6   18.60   12.10
  -6   4   6   49.99    8.10
   6   4  -6   44.40   13.80
   6   4  -6   36.00   14.90
  -6   4   6   45.70    6.80
  -5  -4   6  185.58   18.80
   5  -4  -6  166.78   12.60
  -5  -4   6  155.58   16.80
   5  -4  -6  147.09   13.80
   5  -4  -6  164.58   12.70
  -5  -4   6  154.68   17.10
  -5   4   6  163.78   12.50
   5   4  -6  134.19   16.40
  -5   4   6  173.48   12.20
   5   4  -6  170.58   18.00
   5   4  -6  184.48   19.50
  -4  -4   6   55.49   14.10
   4  -4  -6   88.29    9.20
   4  -4  -6   52.19    9.80
  -4  -4   6   59.39   12.90
  -4   4   6   93.99   10.60
   4   4  -6   65.49   13.80
   4   4  -6   89.59   14.80
  -4   4   6   89.69   11.00
   4   4  -6   75.99   12.80
  -3  -4   6  267.87   22.10
   3  -4  -6  321.27   19.20
   3  -4  -6  221.18   18.20
  -3  -4   6  277.27   23.40
  -3   4   6  274.67   17.50
   3   4  -6  267.37   21.80
   3   4  -6  245.28   23.20
  -3   4   6  286.87   17.70
   3   4  -6  302.47   22.00
  -2  -4   6  146.49   15.90
   2  -4  -6  118.59   14.90
  -2  -4   6  147.99   15.10
   2  -4  -6  100.99   14.60
   2   4  -6  117.29   17.00
  -2   4   6  113.59   13.50
   2   4  -6  142.59   15.30
   2   4  -6  158.08   16.40
   1  -4  -6   61.79   11.40
   1  -4  -6   69.39   12.00
  -1  -4   6   52.09   12.30
   1   4  -6   65.49   11.90
  -1   4   6   44.00   10.10
   1   4  -6   63.29   12.20
   0  -4  -6  168.08   17.70
   0  -4   6  181.08   19.00
   0  -4  -6  200.48   18.70
   0   4  -6  192.78   18.50
   0   4  -6  199.78   16.80
   0   4   6  164.68   17.30
  -1  -4  -6   36.40   12.60
  -1  -4  -6   24.00   11.00
   1  -4   6   29.40   11.70
   1  -4   6   36.70   18.60
  -1  -4  -6   37.70   12.80
  -1   4  -6   38.50   11.80
  -1   4  -6   40.70   17.70
   1   4   6   43.10   11.80
  -1   4  -6   48.20   10.20
   1   4   6    4.10   11.70
  -2  -4  -6   65.89   22.80
  -2  -4  -6   33.60   13.30
  -2  -4  -6   31.20   11.40
   2  -4   6   30.40   12.30
   2  -4   6   27.10   11.40
  -2   4  -6   41.60    9.80
  -2   4  -6   37.10   11.40
   2   4   6   19.60   14.90
  -2   4  -6   29.70   14.90
   2   4   6   26.80   11.80
  -3  -4  -6  307.07   24.90
   3  -4   6  328.07   24.90
  -3  -4  -6  357.46   26.90
  -3  -4  -6  325.57   26.60
   3  -4   6  336.67   24.70
   3   4   6  309.67   23.90
  -3   4  -6  338.07   27.00
  -3   4  -6  362.36   24.80
   3   4   6  341.07   25.60
  -3   4  -6  342.37   21.10
  -4  -4  -6  399.06   29.90
   4  -4   6  378.26   27.70
  -4  -4  -6  364.46   27.60
   4  -4   6  397.66   27.30
  -4  -4  -6  380.96   28.80
  -4   4  -6  390.96   29.30
  -4   4  -6  384.56   22.90
   4   4   6  353.66   26.80
   4   4   6  379.76   28.30
  -4   4  -6  375.36   27.10
  -5  -4  -6   -0.10   14.20
   5  -4   6   24.00   11.90
  -5  -4  -6   12.20   15.00
  -5  -4  -6    4.50   12.80
   5  -4   6   15.10   13.00
  -5   4  -6   16.70   13.90
  -5   4  -6    9.60   11.90
  -5   4  -6   22.90    9.00
   5   4   6   14.80   14.50
   5   4   6   10.20   12.90
   6  -4   6  201.08   21.00
  -6  -4  -6  158.78   18.90
  -6  -4  -6  175.48   22.10
   6  -4   6  196.08   22.30
  -6  -4  -6  199.78   23.90
   6   4   6  161.18   19.60
   6   4   6  215.58   24.20
  -6   4  -6  194.18   23.00
  -6   4  -6  173.28   22.60
  -6   4  -6  192.18   16.50
  -7  -4  -6  139.09   21.60
  -7  -4  -6  132.49   19.80
   7  -4   6  131.49   17.20
   7  -4   6  123.59   18.30
   7   4   6  170.38   20.20
   7   4   6  117.29   19.00
  -7   4  -6  132.39   16.40
  -7   4  -6  130.19   18.30
  -7   4  -6  122.59   15.70
   8  -4   6   99.09   16.30
  -8  -4  -6  113.29   22.50
   8  -4   6   61.39   15.80
  -8   4  -6   71.79   16.80
  -8   4  -6   97.39   13.50
   8   4   6  108.59   19.20
   8   4   6   70.29   18.30
  -8   4  -6   39.90   15.80
  -9  -4  -6   -6.40   14.70
  -9  -4  -6    8.20   20.30
   9  -4   6   10.90   14.30
  -9  -4  -6    9.40   18.40
   9   4   6   10.50   17.90
  -9   4  -6    3.70   11.20
   9   4   6   48.40   17.70
  -9   4  -6    2.40   12.70
 -10  -4  -6   70.49   24.80
  10  -4   6   45.50   16.60
 -10  -4  -6   83.69   18.30
  10  -4   6   80.39   17.20
 -10  -4  -6   47.90   20.50
 -10   4  -6   78.89   17.80
 -10   4  -6  114.09   14.90
  10   4   6   78.99   23.50
  10   4   6  105.19   20.20
 -10   4  -6   53.69   16.50
 -11  -5   6   13.40   20.00
 -11  -5   6    5.10   16.30
 -11  -5   6    8.70   24.60
  11  -5  -6   20.30   10.00
  11   5  -6   16.10   21.60
  11   5  -6   26.80   19.60
  11   5  -6    9.30   18.50
  10  -5  -6   28.70   10.40
 -10  -5   6    0.40   17.80
 -10  -5   6   36.10   18.20
  10  -5  -6   36.40   10.50
  10   5  -6    9.90   18.40
  10   5  -6   25.70   15.70
  10   5  -6   24.80   18.10
  -9  -5   6  245.68   25.60
   9  -5  -6  205.58   16.80
   9  -5  -6  211.48   17.10
  -9  -5   6  240.28   27.10
  -9  -5   6  244.38   29.50
   9   5  -6  222.48   28.40
   9   5  -6  224.08   27.10
   9   5  -6  240.18   25.80
  -8  -5   6   12.90   15.70
   8  -5  -6   -7.20    9.70
  -8  -5   6   -1.40   16.50
  -8  -5   6    2.20   15.80
   8  -5  -6    4.60    8.30
   8   5  -6   20.60   16.90
   8   5  -6    0.20   14.00
   8   5  -6   14.60   16.50
  -7  -5   6   44.00   17.30
  -7  -5   6   37.30   14.80
   7  -5  -6   27.10    8.20
  -7  -5   6   27.00   15.50
   7   5  -6    7.60   19.60
   7   5  -6   29.00   16.40
   7   5  -6   18.90   16.20
  -7   5   6   15.10    9.20
  -6  -5   6   69.19   17.40
   6  -5  -6   69.19   11.30
  -6  -5   6   74.19   16.30
  -6  -5   6   51.09   15.80
   6  -5  -6   78.59    9.60
   6   5  -6   72.79   15.10
  -6   5   6   58.39   10.10
   6   5  -6   89.59   17.60
   6   5  -6   72.19   17.30
  -5  -5   6   30.50   14.70
   5  -5  -6   77.39    9.80
  -5  -5   6   49.40   16.40
   5  -5  -6   65.09   12.90
   5   5  -6   68.19   14.70
   5   5  -6   51.09   15.60
  -5   5   6   74.09   10.50
   5   5  -6   44.30   16.40
   4  -5  -6   88.69   12.30
  -4  -5   6  100.19   15.50
   4  -5  -6   77.89    9.60
   4  -5  -6   99.79   11.00
   4   5  -6   81.79   15.60
  -4   5   6   93.99   11.30
   4   5  -6   98.29   17.00
  -4   5   6   73.89   12.20
   4   5  -6   78.59   15.30
  -3  -5   6   45.50   13.80
   3  -5  -6   57.99    9.60
   3  -5  -6   50.39   11.50
  -3  -5   6   43.50   15.40
   3  -5  -6   49.99   10.70
   3   5  -6   55.89   14.00
   3   5  -6   81.39   16.40
  -3   5   6   49.30   10.90
   3   5  -6   40.30   13.60
   2  -5  -6   52.89   13.30
   2  -5  -6   49.80   10.30
  -2  -5   6   41.20   14.70
   2  -5  -6   35.10   11.90
  -2  -5   6   50.09   13.90
  -2   5   6   46.70   11.00
  -2   5   6   43.90   12.20
   2   5  -6   57.09   15.50
   2   5  -6   36.10   13.90
   2   5  -6   62.49   13.00
   1  -5  -6   17.20   10.40
  -1  -5   6   20.20   13.20
   1  -5  -6   29.70   13.10
   1   5  -6   28.50   11.10
   1   5  -6   15.70   12.60
  -1   5   6   11.30   11.10
   1   5  -6   30.30   14.90
   0  -5   6   48.70   14.60
   0  -5  -6   80.49   15.60
   0  -5   6   71.59   15.40
   0  -5  -6   74.99   12.90
   0   5  -6   51.29   15.70
   0   5  -6   85.49   14.30
   0   5   6   57.89   13.10
   0   5  -6   74.59   11.90
  -1  -5  -6   63.99   18.30
  -1  -5  -6   43.00   12.60
  -1  -5  -6   26.50   13.00
   1  -5   6   45.40   13.60
  -1   5  -6   51.39   13.30
   1   5   6   37.20   13.50
  -1   5  -6   47.10   11.20
  -2  -5  -6   41.90   14.20
   2  -5   6   51.89   14.50
  -2  -5  -6    8.50   13.80
  -2   5  -6   42.10   13.80
   2   5   6   33.70   13.70
   2   5   6   35.10   13.60
  -2   5  -6   39.90   10.40
  -3  -5  -6   20.00   16.20
  -3  -5  -6   21.10   16.60
  -3  -5  -6   26.20   17.30
  -3   5  -6   34.00   13.00
   3   5   6    8.60   14.60
  -3   5  -6   27.90    7.10
   3   5   6   32.50   14.40
  -4  -5  -6   32.50   15.20
   4  -5   6   20.50   13.80
  -4  -5  -6   27.10   14.40
  -4  -5  -6   24.70   15.20
   4  -5   6   16.10   14.50
   4   5   6    5.80   15.10
  -4   5  -6   25.30   13.90
  -4   5  -6   -1.90   16.50
   4   5   6   32.10   15.10
  -5  -5  -6    6.90   15.40
   5  -5   6    3.80   13.60
  -5  -5  -6   12.30   14.60
  -5  -5  -6   15.10   16.70
   5  -5   6   42.50   14.10
   5   5   6    7.50   14.30
  -5   5  -6   30.60   16.80
  -5   5  -6    6.40   12.80
   5   5   6   40.10   16.00
   6  -5   6  140.79   21.30
  -6  -5  -6  166.58   25.60
   6  -5   6  187.08   22.40
  -6  -5  -6  182.08   24.90
  -6  -5  -6  165.98   20.40
   6   5   6  109.49   19.00
   6   5   6  204.58   25.20
  -6   5  -6  136.79   19.10
  -6   5  -6  144.19   27.60
  -7  -5  -6  -12.00   15.70
   7  -5   6  -15.60   17.30
   7  -5   6    2.20   14.00
  -7  -5  -6   10.60   21.70
  -7   5  -6    3.30   16.70
   7   5   6   23.10   17.40
  -7   5  -6   25.80   14.60
  -8  -5  -6   -9.70   21.50
   8  -5   6   26.10   17.50
   8   5   6   31.40   18.40
  -8   5  -6   10.50   17.30
  -7  -6   6    8.00   16.60
   7  -6  -6   14.00    9.10
  -7  -6   6   10.80   14.60
  -7  -6   6   -4.40   20.10
   7   6  -6   23.90   16.50
   7   6  -6    5.40   17.50
   7   6  -6   23.80   15.20
   6  -6  -6   15.70   10.90
  -6  -6   6    8.60   18.40
  -6  -6   6   36.80   17.30
   6   6  -6   14.10   14.80
   6   6  -6   28.10   16.20
   6   6  -6   29.40   17.80
   5  -6  -6  113.89   15.00
   5  -6  -6  113.39   15.40
  -5  -6   6  122.19   20.70
  -5  -6   6  116.49   19.80
  -5   6   6  123.39   14.00
   5   6  -6   85.79   20.00
   5   6  -6   82.19   18.10
   5   6  -6  103.69   20.60
   4  -6  -6   12.60   13.00
  -4  -6   6   34.70   16.10
  -4  -6   6   56.69   16.90
   4  -6  -6   53.89   11.20
   4   6  -6   20.70   14.20
  -4   6   6   33.60    9.90
   4   6  -6   19.70   15.70
  -4   6   6   15.80   13.50
   4   6  -6   31.20   15.80
   3  -6  -6   77.69   14.40
  -3  -6   6   82.99   17.10
   3  -6  -6   68.09   13.10
  -3  -6   6   78.29   17.40
   3   6  -6   66.49   15.60
   3   6  -6   75.09   14.50
   3   6  -6   41.90   17.00
  -3   6   6   88.49   14.90
   2  -6  -6   31.50   14.00
   2  -6  -6   27.80    9.10
  -2  -6   6   35.20   15.40
   2  -6  -6   31.60   12.10
   2   6  -6   31.90   15.10
   2   6  -6   29.30   11.70
  -2   6   6   16.70   14.10
   2   6  -6   33.40   16.60
  -1  -6   6   80.39   17.30
   1  -6  -6   57.49   10.70
  -1  -6   6   62.69   17.00
   1  -6  -6   50.59   14.20
   1  -6  -6   62.19   16.30
  -1   6   6   60.29   12.30
   1   6  -6   65.09   16.50
   1   6  -6   56.39   11.40
   1   6  -6   45.30   15.80
   0  -6  -6   15.70   10.80
   0  -6   6   12.90   15.30
   0  -6   6   21.50   17.30
   0  -6  -6   24.60   18.20
   0  -6  -6  -14.20   16.20
   0   6   6   24.90   11.20
   0   6  -6   27.40   16.20
   0   6  -6   20.80   14.40
  -1  -6  -6   82.39   14.50
  -1  -6  -6   91.29   17.00
   1  -6   6  106.49   27.40
  -1   6  -6   86.19   19.00
   1   6   6   52.29   16.40
  -1   6  -6   83.49   14.80
  -2  -6  -6   69.39   17.10
   2  -6   6   82.99   17.40
  -2  -6  -6   66.89   17.00
   2   6   6   70.49   16.80
  -2   6  -6   91.19   17.30
   3  -6   6  121.79   22.60
   3  -6   6   92.69   18.70
  -3  -6  -6   52.79   15.90
  -3  -6  -6   89.39   18.80
  -3   6  -6   79.79   17.60
   3   6   6   74.79   16.20
  -3   6  -6   68.79   15.00
  17   0  -7   50.19   16.90
 -17   0   7    5.40   23.00
 -17   0   7   21.00   18.60
  17   0  -7   18.20   18.30
 -17   0   7   38.00   14.60
 -16   0   7   14.20   16.70
 -16   0   7   12.20   15.10
  16   0  -7    3.90   19.90
 -16   0   7  -16.40   14.20
  16   0  -7   16.20   19.30
  16   0  -7   11.00   17.20
  15   0  -7   11.80   16.00
 -15   0   7   42.90   15.00
  15   0  -7   33.70   19.30
 -15   0   7   14.10   17.80
 -15   0   7    9.80   13.10
  14   0  -7   59.49   15.60
 -14   0   7   48.10   14.70
 -14   0   7   60.29   13.00
  14   0  -7   63.79   19.20
 -14   0   7   58.59   16.20
  14   0  -7   83.69   16.50
  13   0  -7   62.19   14.60
 -13   0   7   25.90   14.90
  13   0  -7   55.59   18.00
  13   0  -7   42.20   12.90
 -13   0   7   52.59   13.60
  12   0  -7   -3.00   14.30
  12   0  -7    1.10   11.90
 -12   0   7  -26.30   11.50
 -12   0   7  -16.70   24.90
  12   0  -7  -18.60   17.20
 -12   0   7    0.70    9.50
 -11   0   7   35.70   13.30
 -11   0   7   16.20   10.70
  11   0  -7   23.90   10.90
  11   0  -7    7.00   10.40
 -11   0   7   19.80    9.10
  11   0  -7   16.40   14.20
  10   0  -7   78.09   11.20
 -10   0   7   93.99   11.60
 -10   0   7   71.99   14.50
  10   0  -7   95.49   11.80
  10   0  -7   90.09   15.80
 -10   0   7   93.09   10.30
   9   0  -7  132.79   18.80
  -9   0   7   99.69   13.20
   9   0  -7  116.89   13.40
   9   0  -7  105.49   13.30
  -9   0   7  129.99   17.30
   8   0  -7  128.49   15.10
  -8   0   7  116.89   12.10
   8   0  -7  116.89   12.40
  -8   0   7  114.19   14.00
  -7   0   7  542.05   28.10
  -7   0   7  526.65   31.60
   7   0  -7  525.05   31.50
   7   0  -7  534.35   28.10
  -6   0   7  558.24   28.70
   6   0  -7  529.25   31.80
   6   0  -7  536.05   28.20
   6   0  -7  566.94   28.50
   5   0  -7 2757.12  136.99
   5   0  -7 2863.71  138.89
  -5   0   7 2995.00  137.19
   5   0  -7 2827.52  136.99
   4   0  -7   27.00   10.70
   4   0  -7   13.50    5.80
  -3   0   7 2168.68  103.99
  -3   0   7 2186.38  104.09
   3   0  -7 2113.89  104.09
   3   0  -7 2186.48  104.09
  -2   0   7  628.74   32.10
  -2   0   7  655.23   31.80
   2   0  -7  607.04   32.00
   2   0  -7  581.04   31.70
   1   0  -7 3931.71  188.68
  -1   0   7 3979.00  188.78
   1   0  -7 3983.30  188.78
  -1   0   7 3880.51  188.68
   0   0   7  122.79   13.70
   0   0  -7  120.89   13.50
   0   0  -7  103.69   12.30
   0   0   7  121.69   12.70
  -1   0  -7  918.51   46.10
   1   0   7  885.11   46.10
  -1   0  -7  899.41   45.60
   1   0   7  895.01   45.80
   2   0   7    9.30    9.10
  -2   0  -7   18.50    9.20
   2   0   7    7.60    8.60
  -2   0  -7    8.20    7.70
  -3   0  -7  827.32   43.00
   3   0   7  819.92   43.10
  -3   0  -7  825.92   42.60
   3   0   7  791.82   42.50
  -4   0  -7   41.10    9.80
  -4   0  -7   42.90   10.80
   4   0   7   31.70   11.00
   4   0   7   41.40   10.00
  -5   0  -7  156.78   17.30
   5   0   7  133.59   16.50
  -5   0  -7  130.29   16.70
   5   0   7  132.99   14.80
  -6   0  -7    7.50   11.60
   6   0   7  -10.00   10.30
  -6   0  -7   -9.50   10.90
  -6   0  -7   10.00   10.40
   6   0   7   -6.60   11.60
   7   0   7   -9.30   11.80
   7   0   7  -25.10   12.40
  -7   0  -7    2.80   12.80
  -7   0  -7    1.10   12.90
  -7   0  -7   -9.80   11.40
  -8   0  -7    3.10   14.50
  -8   0  -7  -26.90   13.30
   8   0   7  -21.60   13.40
   8   0   7   -5.30   13.00
  -8   0  -7   -7.50   12.00
  -9   0  -7   -1.50   14.40
   9   0   7   -9.30   13.80
   9   0   7   -3.30   14.70
  -9   0  -7  -23.00   12.50
  -9   0  -7   -6.00   13.20
 -10   0  -7   13.90   13.90
  10   0   7  -37.20   14.20
  10   0   7   -6.40   15.10
 -10   0  -7   -3.80   14.80
 -10   0  -7   10.70   14.90
  11   0   7   29.60   17.10
 -11   0  -7    9.30   16.20
  11   0   7   18.50   27.90
 -11   0  -7   -0.50   15.00
 -12   0  -7   -8.70   17.50
  12   0   7  -15.60   17.50
 -12   0  -7  -20.50   15.20
  12   0   7   -5.60   17.60
 -12   0  -7   -5.60   16.10
  13   0   7    8.00   20.30
 -13   0  -7   12.70   25.20
 -13   0  -7   26.60   18.50
  13   0   7   49.70   22.80
 -13   0  -7  -10.70   19.50
  16  -1  -7   18.70   14.30
 -16  -1   7  -20.00   17.80
  16  -1  -7  -10.60   15.30
  16  -1  -7  -19.80   18.10
 -16  -1   7    8.40   17.70
 -16   1   7   14.10   12.90
  16   1  -7  -26.70   16.40
  16   1  -7    5.40   24.20
  15  -1  -7   74.29   19.90
 -15  -1   7   79.79   19.20
 -15  -1   7   64.59   16.00
  15  -1  -7  117.49   16.90
  15   1  -7   79.29   17.60
  15   1  -7   98.19   18.30
  15   1  -7   77.99   21.00
 -15   1   7   74.49   18.70
 -15   1   7   52.69   13.70
 -15   1   7   93.99   16.50
  14  -1  -7  200.28   21.70
 -14  -1   7   91.39   16.80
 -14  -1   7  154.58   21.50
  14  -1  -7  170.58   21.20
 -14  -1   7  150.18   19.00
  14  -1  -7  165.28   21.20
 -14   1   7  186.28   21.90
  14   1  -7  160.88   18.90
 -14   1   7  123.59   20.10
 -14   1   7  128.19   15.00
  14   1  -7  121.09   20.50
  13  -1  -7   30.10   11.50
 -13  -1   7   29.90   15.80
 -13  -1   7   28.80   11.70
 -13  -1   7   11.60   13.30
  13  -1  -7   47.00   13.90
  13  -1  -7   41.60   25.20
  13   1  -7   34.20   17.10
  13   1  -7   17.50   14.00
  13   1  -7   30.20   14.20
 -13   1   7   22.90   14.60
 -12  -1   7   96.49   17.00
  12  -1  -7  149.99   15.90
  12  -1  -7  188.18   18.50
  12  -1  -7  119.49   18.00
 -12  -1   7  138.99   16.50
 -12  -1   7  125.59   15.70
 -12   1   7  116.09   12.80
  12   1  -7  117.99   19.60
  12   1  -7  115.39   16.10
  12   1  -7  142.79   16.30
 -12   1   7  146.49   21.60
 -11  -1   7  386.86   26.20
  11  -1  -7  431.76   30.00
  11  -1  -7  431.46   25.30
 -11  -1   7  382.16   38.00
 -11  -1   7  465.45   28.10
 -11   1   7  476.35   30.10
  11   1  -7  417.26   27.50
 -11   1   7  437.46   26.90
 -11   1   7  435.06   25.00
  11   1  -7  436.36   34.80
  10  -1  -7  263.77   19.00
 -10  -1   7  310.47   24.50
  10  -1  -7  275.97   24.10
 -10  -1   7  284.87   20.40
 -10  -1   7  305.57   21.70
 -10   1   7  302.27   19.10
 -10   1   7  324.57   18.70
 -10   1   7  354.36   24.20
  10   1  -7  317.17   21.90
  10   1  -7  296.07   26.60
  10   1  -7  299.67   22.90
   9  -1  -7   31.40   12.00
  -9  -1   7   50.29   13.00
  -9  -1   7   52.09   10.60
   9  -1  -7   45.40    7.40
   9   1  -7   38.10   10.10
  -9   1   7   53.09    7.00
  -9   1   7   41.90   12.50
   9   1  -7   32.60   10.20
   9   1  -7   62.49   14.70
   8  -1  -7  167.68   17.30
  -8  -1   7  164.78   18.60
  -8  -1   7  169.38   15.90
   8   1  -7  171.88   15.50
   8   1  -7  177.38   20.20
  -7  -1   7  562.04   30.50
  -7  -1   7  610.14   30.40
  -7  -1   7  523.05   32.40
   7  -1  -7  555.64   31.80
   7   1  -7  532.45   30.10
   7   1  -7  544.15   33.50
  -6  -1   7 1140.49   59.99
   6  -1  -7 1181.58   59.69
  -6  -1   7 1268.87   58.79
  -6  -1   7 1236.38   58.49
   6   1  -7 1118.99   58.19
   6   1  -7 1146.19   60.49
   6   1  -7 1137.89   58.29
  -5  -1   7 1200.48   57.89
   5  -1  -7 1113.59   58.89
  -5  -1   7 1203.18   58.09
   5   1  -7 1102.39   57.69
   5   1  -7 1168.78   57.89
   5   1  -7 1213.78   60.09
  -4  -1   7  917.41   43.40
   4  -1  -7  805.12   41.30
   4   1  -7  854.51   43.20
   4   1  -7  838.72   45.10
   3  -1  -7  417.66   22.60
   3  -1  -7  413.36   22.90
  -3  -1   7  431.96   25.10
  -3  -1   7  458.05   24.60
   3   1  -7  438.86   25.00
  -3   1   7  467.55   23.10
  -3   1   7  437.06   22.50
   3   1  -7  469.25   27.30
   3   1  -7  421.36   24.50
   2  -1  -7  301.27   17.70
   2  -1  -7  307.47   18.00
  -2  -1   7  323.97   19.90
  -2  -1   7  288.27   18.90
   2   1  -7  300.07   19.50
   2   1  -7  308.17   19.00
  -2   1   7  305.67   17.40
  -1  -1   7  151.18   16.80
  -1  -1   7  155.28   13.60
   1  -1  -7  147.49   13.10
   1  -1  -7  132.19   13.10
   1   1  -7  131.79   13.30
  -1   1   7  153.38   13.20
   1   1  -7  131.69   14.30
  -1   1   7  145.59   12.40
   0  -1  -7  634.64   32.40
   0  -1   7  591.74   32.40
   0  -1   7  617.74   32.90
   0  -1  -7  607.14   32.20
   0   1  -7  603.04   32.40
   0   1   7  617.44   32.40
   0   1   7  575.04   31.90
   0   1  -7  605.24   32.90
  -1  -1  -7 1346.07   62.49
   1  -1   7 1255.67   62.29
  -1  -1  -7 1242.88   62.19
   1  -1   7 1262.27   62.39
  -1   1  -7 1239.38   62.19
   1   1   7 1157.68   61.89
  -1   1  -7 1234.88   62.59
   1   1   7 1277.27   62.39
   2  -1   7 2002.20   99.59
  -2  -1  -7 2019.90   99.49
   2  -1   7 2071.29   99.69
  -2  -1  -7 2178.98   99.69
  -2   1  -7 2114.39   99.49
   2   1   7 1916.11   99.89
  -2   1  -7 2055.39   99.69
   2   1   7 1959.50   99.29
   3  -1   7 1134.09   58.79
   3  -1   7 1125.69   58.69
  -3  -1  -7 1139.09   58.69
  -3  -1  -7 1240.58   59.09
   3   1   7 1132.59   58.59
  -3   1  -7 1142.89   58.39
  -3   1  -7 1204.18   58.99
   3   1   7 1179.58   58.99
   4  -1   7   26.60    9.60
   4  -1   7   39.50   10.30
  -4  -1  -7   21.10    9.40
  -4  -1  -7   24.80   11.30
   4   1   7   24.70    9.90
   4   1   7   31.00   11.10
  -4   1  -7   30.20    9.30
  -4   1  -7   28.30   10.20
   5  -1   7  802.52   42.00
  -5  -1  -7  799.22   42.70
   5  -1   7  713.23   42.10
  -5  -1  -7  775.62   43.50
  -5  -1  -7  758.02   41.90
   5   1   7  775.82   42.60
  -5   1  -7  815.22   41.80
  -5   1  -7  765.02   42.00
   5   1   7  772.72   42.00
  -6  -1  -7  864.81   47.40
  -6  -1  -7  825.62   46.60
   6  -1   7  890.51   46.80
   6  -1   7  855.81   47.10
  -6   1  -7  839.82   47.00
   6   1   7  848.82   47.50
  -6   1  -7  967.80   47.90
   6   1   7  860.41   46.90
  -6   1  -7  864.01   46.60
   7  -1   7  135.49   16.50
  -7  -1  -7  140.69   17.10
   7  -1   7  154.98   19.40
  -7  -1  -7   60.69   25.90
  -7  -1  -7  133.09   16.00
  -7   1  -7  155.38   16.80
  -7   1  -7  144.59   15.80
   7   1   7  155.88   17.70
   7   1   7  125.49   16.30
  -7   1  -7  147.59   19.80
  -8  -1  -7   63.39   14.10
  -8  -1  -7   50.19   15.50
   8  -1   7   54.29   16.40
  -8  -1  -7   28.10   14.60
   8  -1   7   57.69   14.00
  -8   1  -7   63.29   15.40
   8   1   7   50.29   15.50
  -8   1  -7   55.59   13.50
  -8   1  -7   65.99   15.10
   8   1   7   46.10   14.60
   9  -1   7   88.99   16.40
  -9  -1  -7   98.29   23.40
  -9  -1  -7   80.59   15.60
   9  -1   7   71.29   16.90
  -9  -1  -7   75.49   19.20
  -9   1  -7   77.69   15.10
  -9   1  -7  106.89   17.40
   9   1   7  150.78   22.60
  -9   1  -7   89.59   16.50
   9   1   7   89.89   16.70
  10  -1   7   88.99   17.80
 -10  -1  -7  117.39   17.70
 -10  -1  -7  113.49   22.30
 -10  -1  -7   95.09   19.00
  10  -1   7   97.99   18.60
  10   1   7   77.89   18.30
  10   1   7  111.99   19.80
 -10   1  -7   66.49   17.20
 -10   1  -7   91.19   17.00
 -10   1  -7   85.19   17.30
 -11  -1  -7   38.90   21.50
  11  -1   7   28.20   17.20
  11  -1   7   31.60   16.50
 -11  -1  -7   44.80   19.10
 -11  -1  -7    0.80   17.50
  11   1   7   -0.30   16.90
 -11   1  -7   18.40   15.80
 -11   1  -7   25.30   15.20
 -11   1  -7   33.60   16.50
 -12  -1  -7   22.00   16.10
 -12  -1  -7   20.30   18.30
  12  -1   7   -1.00   17.70
 -12  -1  -7    2.30   25.40
  12  -1   7   -7.00   18.50
  12   1   7   35.90   18.40
 -12   1  -7   12.00   17.50
 -12   1  -7  -18.00   21.80
 -12   1  -7   13.20   15.30
  12   1   7  -10.80   17.30
 -16  -2   7   16.90   17.90
  16  -2  -7   32.90   14.90
  16  -2  -7   23.50   18.00
 -16  -2   7    3.80   15.70
  16  -2  -7  -12.90   12.00
 -16   2   7    9.60   10.90
  16   2  -7   50.09   19.10
 -16   2   7   60.09   19.10
  16   2  -7    5.80   19.40
 -15  -2   7   20.40   15.50
  15  -2  -7   -0.70   16.50
  15  -2  -7   24.50   12.90
 -15  -2   7    8.10   15.10
  15   2  -7   -2.90   19.30
 -15   2   7   -2.60   16.50
 -15   2   7   -0.90   10.20
  15   2  -7   24.90   17.40
  15   2  -7   13.60   21.60
  14  -2  -7    8.00    9.60
  14  -2  -7    4.00   11.00
 -14  -2   7    1.60   14.30
 -14  -2   7    2.20   14.30
 -14  -2   7  -24.40   14.70
  14   2  -7   16.90   16.30
  14   2  -7   21.60   16.90
 -14   2   7   18.40   24.50
  14   2  -7  -11.10   16.90
 -14   2   7    7.20   11.60
  13  -2  -7   -2.30   11.30
  13  -2  -7    4.00   14.80
 -13  -2   7   22.00   14.70
 -13  -2   7   24.70   15.50
 -13  -2   7   16.30   14.90
 -13   2   7   -1.40   15.00
  13   2  -7  -12.70   14.50
 -13   2   7   11.40    9.20
  13   2  -7  -13.90   18.20
  13   2  -7   -2.60   15.20
  12  -2  -7   74.09   15.70
 -12  -2   7   88.59   18.30
 -12  -2   7   94.79   15.60
  12  -2  -7  102.39   12.60
 -12  -2   7  106.29   15.30
  12   2  -7   52.99   16.00
  12   2  -7   98.49   20.20
  12   2  -7   71.89   15.40
 -12   2   7  110.29   11.40
 -11  -2   7  103.09   15.10
  11  -2  -7  108.89   11.10
 -11  -2   7   66.89   15.90
 -11  -2   7  108.09   14.50
  11  -2  -7   96.19   15.10
  11   2  -7   88.19   15.80
  11   2  -7   81.89   18.10
  11   2  -7   86.99   15.30
  10  -2  -7  109.39   14.60
 -10  -2   7  129.99   14.50
  10   2  -7  100.79   14.70
  10   2  -7   90.39   22.20
  -9  -2   7   25.60   11.60
   9  -2  -7   20.50   11.20
  -9  -2   7   12.10   13.10
   9   2  -7    0.20   13.80
   9   2  -7   32.70   11.60
   8  -2  -7  185.18   17.30
  -8  -2   7  173.18   17.80
  -8  -2   7  169.08   19.00
   8   2  -7  165.18   17.20
   8   2  -7  165.98   20.90
  -7  -2   7  393.06   27.30
  -7  -2   7  452.85   26.30
  -7  -2   7  420.66   26.30
   7  -2  -7  412.96   25.30
   7   2  -7  404.86   25.60
   7   2  -7  422.06   28.70
   7   2  -7  414.36   25.30
  -6  -2   7  -12.60    9.10
  -6  -2   7   17.00    9.10
  -6  -2   7    7.90   11.10
   6  -2  -7    0.50    8.50
   6   2  -7    1.90   11.60
   6   2  -7   13.90    9.10
   6   2  -7   16.50    8.50
   5  -2  -7  271.27   20.10
  -5  -2   7  312.87   20.50
  -5  -2   7  311.17   21.30
   5   2  -7  307.37   22.30
   5   2  -7  304.97   20.50
   5   2  -7  309.77   20.00
  -4  -2   7  308.47   21.70
  -4  -2   7  345.67   21.20
   4   2  -7  320.87   21.20
   4   2  -7  341.17   22.70
   4   2  -7  308.47   20.60
   3  -2  -7  141.99   10.50
  -3  -2   7  137.49   14.30
   3   2  -7  144.69   14.20
   3   2  -7  153.18   16.70
   2  -2  -7  294.97   18.30
  -2  -2   7  310.77   20.60
  -2  -2   7  347.47   21.00
   2  -2  -7  308.17   18.80
   2   2  -7  331.37   21.90
  -2   2   7  328.47   18.30
   2   2  -7  311.47   21.80
  -2   2   7  333.67   18.30
   2   2  -7  319.47   20.40
   1  -2  -7  430.96   26.00
  -1  -2   7  509.25   27.60
  -1  -2   7  479.65   27.20
   1  -2  -7  492.45   26.50
   1   2  -7  490.35   27.20
  -1   2   7  479.35   25.90
   1   2  -7  481.95   27.80
   0  -2   7  527.65   29.40
   0  -2   7  556.54   29.60
   0  -2  -7  556.64   29.60
   0  -2  -7  482.05   28.80
   0   2   7  507.95   28.80
   0   2  -7  520.55   30.00
   0   2   7  565.54   28.90
   0   2  -7  527.25   29.50
   1  -2   7  412.66   24.80
  -1  -2  -7  388.66   24.30
   1  -2   7  425.16   25.30
  -1  -2  -7  459.65   25.50
  -1   2  -7  396.16   25.50
   1   2   7  402.26   24.30
  -1   2  -7  412.86   24.70
   1   2   7  414.86   24.60
   2  -2   7  622.34   32.90
  -2  -2  -7  553.34   32.40
   2  -2   7  578.34   33.10
  -2  -2  -7  629.04   33.60
  -2   2  -7  586.54   32.60
  -2   2  -7  616.24   33.20
   2   2   7  574.44   32.70
   2   2   7  573.34   32.90
   3  -2   7  103.69   12.60
  -3  -2  -7   88.69   11.80
   3  -2   7  119.49   12.70
  -3  -2  -7  133.09   14.80
  -3   2  -7  116.19   13.10
   3   2   7   89.99   12.90
   3   2   7  110.29   13.40
  -3   2  -7  119.49   12.40
   4  -2   7  338.37   22.70
   4  -2   7  311.57   22.60
  -4  -2  -7  322.17   24.40
  -4  -2  -7  282.77   22.50
  -4  -2  -7  331.27   24.80
   4   2   7  321.67   23.70
  -4   2  -7  313.27   23.30
   4   2   7  306.57   22.90
  -4   2  -7  324.87   22.10
  -5  -2  -7  158.98   17.10
   5  -2   7  113.49   14.30
  -5  -2  -7  107.99   14.20
  -5  -2  -7  130.79   17.50
   5  -2   7  114.19   14.40
  -5   2  -7  138.19   16.20
   5   2   7   95.49   14.10
  -5   2  -7  111.79   14.60
   5   2   7  127.79   15.40
   6  -2   7  218.98   21.20
  -6  -2  -7  195.28   20.80
  -6  -2  -7  165.18   35.70
   6  -2   7  232.68   20.80
  -6  -2  -7  205.18   23.90
  -6   2  -7  225.78   20.40
  -6   2  -7  235.58   20.00
  -6   2  -7  208.78   21.70
   6   2   7  195.98   22.30
   6   2   7  231.88   21.50
  -7  -2  -7  151.18   17.00
  -7  -2  -7  185.88   20.30
   7  -2   7  156.58   16.90
  -7  -2  -7  155.08   20.10
   7  -2   7  135.49   17.40
  -7   2  -7  131.29   16.60
  -7   2  -7  150.08   19.20
   7   2   7  144.29   18.10
  -7   2  -7  115.29   15.50
   7   2   7  123.79   17.10
  -8  -2  -7   80.99   16.70
  -8  -2  -7  120.59   19.40
   8  -2   7   99.19   16.40
  -8  -2  -7   66.09   26.50
   8  -2   7   88.79   15.20
   8   2   7   71.69   16.40
  -8   2  -7   78.29   14.60
  -8   2  -7   93.89   15.10
  -8   2  -7  121.39   16.60
  -9  -2  -7  -18.80   13.20
   9  -2   7   -6.80   14.10
   9  -2   7  -20.60   13.90
  -9  -2  -7   13.30   17.10
  -9  -2  -7    2.00   16.90
  -9   2  -7  -12.80   13.20
   9   2   7  -11.40   18.70
  -9   2  -7   -0.50   14.20
  -9   2  -7    5.00   14.90
   9   2   7    2.20   16.60
  10  -2   7   17.80   15.00
 -10  -2  -7  -22.80   17.30
  10  -2   7    5.30   16.20
 -10  -2  -7  -14.10   13.90
 -10  -2  -7    7.10   17.20
 -10   2  -7  -13.70   14.50
  10   2   7   16.50   16.80
 -10   2  -7   16.80   14.30
 -10   2  -7    7.50   15.30
  10   2   7  -24.00   15.70
  11  -2   7   58.29   17.90
 -11  -2  -7   18.20   19.10
 -11  -2  -7   43.00   19.30
  11  -2   7   54.69   17.20
 -11  -2  -7   15.60   15.40
  11   2   7   35.20   18.20
  11   2   7   58.59   19.20
 -11   2  -7   36.60   15.50
 -11   2  -7   49.20   17.20
 -11   2  -7   48.60   17.00
 -12  -2  -7    0.30   16.00
  12  -2   7  -12.60   17.70
  12  -2   7    0.70   17.80
 -12  -2  -7   -4.40   18.50
 -12  -2  -7    4.80   22.40
  12   2   7    5.30   21.30
  12   2   7   19.70   17.60
 -12   2  -7    4.70   16.30
 -12   2  -7    6.30   17.70
 -12   2  -7  -11.10   15.70
  15  -3  -7   88.69   23.00
 -15  -3   7   78.09   20.70
 -15  -3   7   65.59   22.20
 -15  -3   7  130.59   22.20
  15   3  -7   97.79   20.90
  15   3  -7   52.19   19.70
  15   3  -7  101.99   24.20
 -14  -3   7   45.10   17.60
 -14  -3   7   18.70   19.50
 -14  -3   7   35.40   20.30
  14  -3  -7   49.10   15.20
  14   3  -7   65.79   20.90
  14   3  -7   35.80   24.80
  14   3  -7   36.70   17.40
  13  -3  -7   40.30    9.80
 -13  -3   7   16.80   15.80
  13  -3  -7   53.59   14.70
 -13  -3   7    2.70   16.40
 -13  -3   7   36.20   18.60
  13   3  -7   34.00   18.40
  13   3  -7   38.30   19.20
  13   3  -7   28.40   17.20
 -12  -3   7  147.89   18.00
 -12  -3   7  156.48   20.20
 -12  -3   7  149.99   25.10
  12  -3  -7  170.48   19.70
  12   3  -7  163.98   24.10
  12   3  -7  143.79   20.30
  11  -3  -7  126.19   17.10
 -11  -3   7   79.09   18.20
 -11  -3   7  101.09   16.80
  11   3  -7   66.79   18.20
  11   3  -7  116.29   18.10
  10  -3  -7  131.59   16.30
 -10  -3   7  176.38   23.40
 -10  -3   7  132.39   18.10
  10   3  -7  138.49   21.60
  10   3  -7  111.79   17.00
   9  -3  -7  181.38   16.20
  -9  -3   7  149.69   22.00
  -9  -3   7  159.38   20.60
   9   3  -7   89.39   26.60
   9   3  -7  157.58   17.90
  -8  -3   7  225.68   22.40
   8  -3  -7  235.18   17.20
  -8  -3   7  196.28   23.10
  -8  -3   7  216.68   21.70
   8   3  -7  198.78   20.70
   8   3  -7  201.28   24.80
   8   3  -7  180.48   20.80
   7  -3  -7   13.70    8.60
  -7  -3   7    9.80   12.10
  -7  -3   7    3.00   11.80
  -7  -3   7   -2.70   13.00
   7   3  -7   -3.30   13.10
   7   3  -7    5.50   11.30
   7   3  -7   -3.20   11.10
   6  -3  -7   64.99   10.40
  -6  -3   7   89.19   14.50
  -6  -3   7   87.39   12.80
  -6  -3   7   73.99   13.60
   6   3  -7   78.99   12.60
   6   3  -7   90.79   14.90
   6   3  -7   83.89   12.90
  -5  -3   7  456.35   27.80
  -5  -3   7  423.76   28.60
   5   3  -7  474.65   28.90
   5   3  -7  436.36   27.90
   5   3  -7  442.66   27.50
  -4  -3   7  181.58   18.90
   4  -3  -7  175.88   13.10
  -4  -3   7  225.08   18.00
   4   3  -7  190.08   18.50
   4   3  -7  200.18   19.20
   4   3  -7  180.68   17.10
  -3  -3   7  121.09   15.40
  -3  -3   7  132.89   13.90
   3  -3  -7   91.09   11.80
   3   3  -7  112.79   12.60
   3   3  -7  127.29   13.60
   3   3  -7  131.39   16.30
  -3   3   7  126.29   10.60
  -2  -3   7  128.69   15.80
   2  -3  -7   98.49   13.10
   2  -3  -7  121.49   11.50
  -2   3   7  117.69   11.60
   2   3  -7  125.29   13.00
  -2   3   7  108.69   11.30
   2   3  -7  126.09   16.30
  -1  -3   7  124.29   13.10
  -1  -3   7  123.99   15.80
   1  -3  -7  128.59   14.40
   1  -3  -7  112.29   13.30
   1   3  -7  120.59   14.70
  -1   3   7  129.29   12.70
   1   3  -7  138.89   15.30
   1   3  -7  138.69   15.00
   0  -3  -7  225.68   17.80
   0  -3   7  229.88   19.10
   0  -3  -7  264.87   19.10
   0  -3   7  257.07   19.40
   0   3   7  222.48   17.40
   0   3   7  227.98   18.00
   0   3  -7  241.88   19.10
   0   3  -7  246.98   21.30
   0   3  -7  268.77   18.90
   1  -3   7  660.63   36.20
  -1  -3  -7  730.63   36.70
   1  -3   7  662.23   36.20
  -1  -3  -7  618.84   35.60
  -1   3  -7  652.33   35.30
   1   3   7  617.24   35.20
  -1   3  -7  598.24   36.90
  -1   3  -7  639.84   36.10
   1   3   7  674.03   35.60
  -2  -3  -7  239.08   20.90
  -2  -3  -7  210.38   19.40
  -2  -3  -7  261.97   20.80
   2  -3   7  260.97   19.60
   2  -3   7  249.38   20.10
  -2   3  -7  205.78   20.80
   2   3   7  220.88   18.60
  -2   3  -7  249.48   19.70
   2   3   7  243.68   20.00
  -3  -3  -7  136.19   17.60
  -3  -3  -7  156.68   19.70
   3  -3   7  137.69   18.30
  -3  -3  -7  161.68   20.00
   3  -3   7  169.08   17.40
  -3   3  -7  155.48   17.30
  -3   3  -7  156.88   19.20
   3   3   7  170.88   16.40
   3   3   7  134.29   15.00
  -4  -3  -7  389.86   29.90
   4  -3   7  447.76   28.30
  -4  -3  -7  417.46   30.30
   4  -3   7  431.86   27.60
  -4  -3  -7  432.16   30.50
   4   3   7  407.96   28.70
   4   3   7  397.26   27.70
  -4   3  -7  421.86   28.80
  -4   3  -7  449.86   27.70
  -5  -3  -7  605.04   38.90
   5  -3   7  671.53   38.20
  -5  -3  -7  626.14   39.80
  -5  -3  -7  627.94   43.40
   5  -3   7  683.73   37.50
  -5   3  -7  649.83   37.20
  -5   3  -7  642.44   38.20
   5   3   7  626.54   38.30
  -6  -3  -7  213.08   24.80
   6  -3   7  227.18   21.30
  -6  -3  -7  195.68   24.50
   6  -3   7  160.28   20.90
  -6  -3  -7  165.28   21.20
  -6   3  -7  221.18   19.30
   6   3   7  189.08   19.90
   6   3   7  182.68   21.60
  -6   3  -7  224.18   22.30
  -6   3  -7  188.78   20.20
   7  -3   7   68.69   14.30
  -7  -3  -7   43.30   17.70
  -7  -3  -7   52.79   14.50
  -7  -3  -7   58.59   16.00
   7  -3   7   56.29   15.00
   7   3   7   63.09   17.20
  -7   3  -7   91.79   14.00
  -7   3  -7   86.79   15.50
  -7   3  -7   89.39   14.80
   7   3   7   69.19   16.70
   8  -3   7   83.29   19.30
  -8  -3  -7  112.29   27.50
  -8  -3  -7   87.29   19.30
   8  -3   7  103.49   16.70
  -8  -3  -7  101.19   16.80
   8   3   7  128.69   18.90
  -8   3  -7  117.29   16.60
  -8   3  -7   99.19   17.30
   8   3   7  132.19   21.00
  -8   3  -7   83.79   17.00
   9  -3   7  177.58   22.50
   9  -3   7  161.08   19.40
  -9  -3  -7  196.58   27.70
  -9  -3  -7  163.28   20.20
  -9  -3  -7  142.39   22.10
  -9   3  -7  201.48   22.00
  -9   3  -7  196.08   24.50
   9   3   7  204.98   25.60
  -9   3  -7  192.58   22.20
   9   3   7  174.98   24.00
 -10  -3  -7   75.19   20.80
 -10  -3  -7   52.79   30.80
  10  -3   7   66.49   17.40
 -10  -3  -7   45.40   21.80
  10  -3   7   45.90   20.80
 -10   3  -7   76.69   23.60
 -10   3  -7   34.90   17.60
  10   3   7   72.19   19.70
 -10   3  -7   81.39   17.70
  10   3   7   31.80   20.20
 -11  -3  -7   -5.20   19.40
 -11  -3  -7    9.40   16.10
  11  -3   7   29.40   17.00
 -11  -3  -7   39.40   22.00
  11  -3   7    7.40   18.80
 -11   3  -7   15.50   16.60
  11   3   7    4.40   20.40
 -11   3  -7   18.20   16.40
 -11   3  -7    3.20   17.00
 -13  -4   7   73.69   37.70
  13  -4  -7   62.89   12.10
  13   4  -7   74.99   32.10
  13   4  -7   37.70   20.70
 -12  -4   7   39.60   17.80
  12  -4  -7   51.99   11.10
 -12  -4   7   29.50   17.90
  12   4  -7   44.50   19.10
  12   4  -7   34.60   18.00
 -11  -4   7   95.79   20.00
  11  -4  -7  133.79   14.30
 -11  -4   7  115.79   26.50
  11   4  -7   84.19   20.80
  11   4  -7  107.09   19.10
 -10  -4   7  202.48   31.20
 -10  -4   7  147.09   20.80
 -10  -4   7  171.08   25.60
  10  -4  -7  196.18   15.90
  10   4  -7  112.59   21.20
  10   4  -7  213.78   26.80
  10   4  -7  173.28   22.30
  -9  -4   7   95.79   16.80
  -9  -4   7  111.19   18.00
  -9  -4   7   83.59   17.10
   9   4  -7   87.29   16.70
   9   4  -7  109.19   17.70
   9   4  -7   78.69   18.10
  -8  -4   7  112.29   17.90
  -8  -4   7  113.49   18.20
  -8  -4   7   90.89   17.90
   8   4  -7  131.19   20.60
   8   4  -7  106.89   17.40
  -7  -4   7   33.10   14.20
   7  -4  -7   19.50   13.90
  -7  -4   7   19.40   15.00
  -7  -4   7   17.10   14.40
   7   4  -7   19.90   15.40
   7   4  -7   42.10   14.40
   7   4  -7   13.40   12.90
  -6  -4   7  114.79   16.90
  -6  -4   7   86.89   15.30
   6  -4  -7   96.39   12.80
   6   4  -7   74.49   14.10
   6   4  -7   95.09   18.00
   6   4  -7   90.89   15.90
   5  -4  -7  151.88   13.90
   5  -4  -7  165.98   12.00
   5  -4  -7  184.58   13.90
  -5  -4   7  137.99   17.60
  -5  -4   7  144.99   17.00
  -5   4   7  169.48   11.30
   5   4  -7  121.09   16.00
  -5   4   7  151.58   13.30
   5   4  -7  139.49   21.00
   5   4  -7  171.68   17.60
   4  -4  -7   54.69    9.90
   4  -4  -7   70.19    8.70
  -4  -4   7   62.79   14.50
  -4  -4   7   34.90   12.80
   4   4  -7   70.29   14.40
   4   4  -7   77.39   14.60
   4   4  -7   46.60   12.30
  -4   4   7   66.69    7.70
  -4   4   7   75.29    9.40
   3  -4  -7  222.68   16.80
  -3  -4   7  168.08   21.10
  -3  -4   7  199.48   20.30
  -3   4   7  216.48   15.20
   3   4  -7  199.48   19.20
   3   4  -7  185.38   19.80
   3   4  -7  215.68   20.40
  -2  -4   7  222.68   20.30
   2  -4  -7  209.68   18.10
  -2  -4   7  211.88   21.40
   2  -4  -7  169.18   17.90
   2   4  -7  230.68   21.90
   2   4  -7  248.28   20.00
   2   4  -7  234.28   20.40
   1  -4  -7  312.57   21.40
  -1  -4   7  251.77   22.60
   1  -4  -7  298.77   20.50
   1  -4  -7  242.68   21.20
  -1   4   7  252.77   21.00
   1   4  -7  306.57   21.40
   1   4  -7  267.37   22.10
   0  -4   7   17.60   13.20
   0  -4  -7    7.40   11.80
   0  -4  -7   -5.90    9.90
   0  -4  -7   -6.40   10.60
   0   4   7    3.70   10.00
   0   4  -7   16.90   11.10
   0   4   7    1.50    9.40
   0   4  -7    5.10   10.10
   1  -4   7   94.99   14.10
  -1  -4  -7   94.59   15.10
  -1  -4  -7   67.59   14.90
  -1  -4  -7   68.09   12.80
   1  -4   7   88.99   17.30
  -1   4  -7   84.49   13.50
  -1   4  -7  104.59   12.70
  -1   4  -7   80.79   18.80
   1   4   7  101.79   13.60
   1   4   7   82.49   12.40
  -2  -4  -7   15.80   11.60
  -2  -4  -7   13.90   12.40
   2  -4   7   -4.70   11.60
   2  -4   7   -3.40   11.00
   2   4   7   -8.00   11.80
  -2   4  -7    7.50    9.60
  -2   4  -7   -9.80   10.90
  -2   4  -7    3.20   13.80
   2   4   7   29.90   14.60
  -3  -4  -7   11.50   13.70
   3  -4   7   16.80   12.70
   3  -4   7   21.80   11.80
  -3  -4  -7   15.80   12.60
  -3  -4  -7    3.80   13.20
   3   4   7    1.60   13.90
   3   4   7   28.00   13.70
  -3   4  -7   23.50    9.90
  -3   4  -7    7.80   14.00
  -3   4  -7   11.70   11.80
  -4  -4  -7  110.59   18.80
  -4  -4  -7  113.29   17.10
   4  -4   7   96.19   14.60
   4  -4   7  110.59   16.20
  -4  -4  -7   84.09   15.60
  -4   4  -7   93.19   15.90
  -4   4  -7  106.19   14.30
  -4   4  -7  104.39   17.10
   4   4   7  131.89   17.30
   4   4   7   71.39   15.50
   5  -4   7   15.50   13.40
  -5  -4  -7   46.30   16.00
  -5  -4  -7   33.20   15.50
  -5  -4  -7   45.90   14.10
   5  -4   7   25.60   12.90
  -5   4  -7   17.70   12.30
  -5   4  -7   12.50   14.50
   5   4   7   19.10   14.10
   5   4   7   43.10   15.50
   6  -4   7  250.67   24.30
  -6  -4  -7  284.57   27.90
  -6  -4  -7  249.58   28.10
  -6  -4  -7  267.27   29.00
  -6   4  -7  279.37   20.40
   6   4   7  260.67   25.90
   6   4   7  312.87   27.30
  -6   4  -7  307.27   26.90
  -6   4  -7  320.27   27.00
   7  -4   7   80.89   16.90
   7  -4   7  123.99   16.70
  -7  -4  -7  104.39   26.50
  -7  -4  -7   85.19   25.50
  -7  -4  -7   89.09   19.30
   7   4   7  131.69   19.70
  -7   4  -7   96.59   17.30
   7   4   7  116.69   19.80
  -7   4  -7  126.09   15.00
  -7   4  -7   85.59   17.50
  -8  -4  -7   -1.80   18.80
   8  -4   7   17.90   15.50
  -8  -4  -7   15.00   20.00
  -8  -4  -7    8.00   15.00
   8  -4   7   17.20   14.10
   8   4   7   -8.30   16.60
  -8   4  -7    3.20   13.10
  -8   4  -7   14.80   12.00
  -8   4  -7   19.60   17.10
   8   4   7   12.60   21.00
   9  -4   7   82.39   17.90
  -9  -4  -7   65.59   17.40
   9  -4   7   67.29   17.10
  -9  -4  -7   66.69   20.30
  -9   4  -7   52.19   17.10
  -9   4  -7  101.19   15.10
  -9   4  -7   89.59   18.40
   9   4   7   72.39   21.00
   9   4   7  103.29   20.30
 -11  -5   7   22.50   16.60
 -11  -5   7   20.30   24.30
  11   5  -7    6.00   18.70
  11   5  -7   19.60   18.40
  11   5  -7   27.90   18.50
 -10  -5   7   66.09   24.10
 -10  -5   7   87.79   19.30
 -10  -5   7   40.80   19.80
  10   5  -7   60.29   20.00
  10   5  -7   33.40   18.70
  10   5  -7   32.80   20.50
  -9  -5   7    6.40   18.00
  -9  -5   7   11.00   17.40
  -9  -5   7   -0.80   16.50
   9   5  -7   11.10   17.40
   9   5  -7  -10.90   17.10
  -8  -5   7  217.48   27.70
  -8  -5   7  259.57   25.40
  -8  -5   7  228.38   27.70
   8   5  -7  248.68   26.40
   8   5  -7  201.68   27.40
   8   5  -7  230.88   25.10
  -7  -5   7  178.88   21.90
  -7  -5   7  161.08   21.70
  -7  -5   7  226.18   23.30
   7  -5  -7  197.88   17.60
   7  -5  -7  199.58   14.50
   7   5  -7  189.48   25.30
   7   5  -7  190.68   22.50
   7   5  -7  201.88   23.30
  -6  -5   7   40.00   16.20
   6  -5  -7   52.09    8.20
  -6  -5   7   54.79   15.60
   6   5  -7   26.50   16.50
  -6   5   7   41.80   10.30
   6   5  -7   36.00   24.90
   6   5  -7   36.10   15.20
   5  -5  -7   43.40    8.50
   5  -5  -7   16.00   10.30
  -5  -5   7   18.10   14.00
  -5  -5   7   28.60   15.30
   5  -5  -7   13.50   10.10
   5  -5  -7   34.10    8.90
   5   5  -7   37.90   15.60
  -5   5   7   31.10   10.00
   5   5  -7   22.30   13.70
  -5   5   7   35.50    9.50
   5   5  -7   48.60   16.10
   4  -5  -7  146.49   14.60
   4  -5  -7  128.29   15.20
  -4  -5   7   99.79   16.90
  -4  -5   7  110.59   17.90
   4  -5  -7  122.59   13.10
  -4   5   7  188.48   17.80
   4   5  -7  170.18   20.60
  -4   5   7  161.28   16.80
   4   5  -7  128.49   18.60
   4   5  -7  147.99   20.80
  -3  -5   7  285.67   35.20
   3  -5  -7  296.57   22.30
  -3  -5   7  244.48   24.60
   3  -5  -7  265.87   20.60
   3  -5  -7  259.07   19.10
  -3   5   7  308.37   21.40
   3   5  -7  265.87   23.30
   3   5  -7  251.57   26.00
   3   5  -7  307.07   24.40
  -3   5   7  281.47   22.30
  -2  -5   7  473.25   40.30
  -2  -5   7  366.66   29.20
   2  -5  -7  424.06   26.80
   2  -5  -7  345.87   24.70
   2   5  -7  417.76   28.80
  -2   5   7  406.36   25.70
  -2   5   7  378.06   25.80
   2   5  -7  400.46   27.10
   2   5  -7  395.66   30.30
  -1  -5   7  179.68   22.70
  -1  -5   7  166.68   21.40
   1  -5  -7  179.98   21.60
   1  -5  -7  156.08   17.60
   1   5  -7  196.38   20.40
   1   5  -7  180.78   18.30
  -1   5   7  153.98   17.90
   1   5  -7  176.78   20.90
   0  -5  -7   36.30   12.50
   0  -5  -7   42.40   13.60
   0  -5   7   62.39   14.30
   0  -5   7   49.10   14.60
   0   5   7   40.10   12.00
   0   5  -7   69.39   12.30
   0   5  -7   78.69   14.60
   0   5  -7   51.79   15.50
   1  -5   7  114.49   17.30
  -1  -5  -7  120.69   16.00
  -1  -5  -7  158.88   19.00
   1   5   7  153.38   16.00
  -1   5  -7   98.19   14.90
  -1   5  -7  121.49   17.20
   1   5   7   92.69   15.40
  -2  -5  -7  142.59   17.90
  -2  -5  -7  155.18   18.70
  -2  -5  -7  148.39   19.10
   2   5   7  179.58   21.40
  -2   5  -7  131.59   14.80
   2   5   7  110.99   15.30
  -2   5  -7  150.18   17.40
   3  -5   7  176.88   23.10
  -3  -5  -7  227.28   23.40
  -3  -5  -7  219.18   24.00
   3  -5   7  189.58   23.20
  -3  -5  -7  193.08   23.10
   3   5   7  252.97   23.30
  -3   5  -7  182.08   22.20
   3   5   7  176.78   20.20
  -3   5  -7  207.08   22.20
   4  -5   7  104.49   16.70
  -4  -5  -7   94.19   17.40
   4  -5   7   82.69   17.40
  -4  -5  -7  112.19   18.50
  -4  -5  -7  130.99   19.70
  -4   5  -7   93.69   19.90
   4   5   7  142.59   18.40
  -4   5  -7  100.49   15.70
   4   5   7  102.89   16.00
  -4   5  -7   98.59   17.70
  -5  -5  -7   70.29   16.80
  -5  -5  -7   78.89   20.00
   5  -5   7   65.39   17.20
  -5  -5  -7   78.49   17.90
   5  -5   7   86.09   16.10
   5   5   7   45.70   15.80
  -5   5  -7   60.69   20.60
  -5   5  -7   70.19   11.80
   5   5   7  101.49   17.70
  -5   5  -7   60.39   16.50
  -5   5  -7   81.29   11.50
   6  -5   7   94.59   17.20
   6  -5   7   38.70   16.90
  -6  -5  -7   80.59   22.80
  -6  -5  -7   75.39   29.70
  -6  -5  -7   47.20   17.30
  -6   5  -7   55.29   19.30
  -6   5  -7   51.09   15.10
   6   5   7   85.69   18.60
  -7  -5  -7   13.00   17.90
   7  -5   7   14.30   16.20
  -7  -5  -7    7.40   15.80
   7  -5   7    9.30   15.10
  -7   5  -7   27.50   17.60
   7   5   7   44.10   17.80
  -7   5  -7   15.40   14.30
   7   5   7   14.80   16.40
  -6  -6   7    7.60   16.20
  -6  -6   7    8.30   22.90
   6   6  -7   14.10   15.70
   6   6  -7    7.40   17.30
   6   6  -7   22.50   16.10
  -5  -6   7   91.69   19.80
  -5  -6   7  121.89   20.40
   5  -6  -7  110.29   14.10
  -5   6   7  111.79   13.60
   5   6  -7  114.79   29.30
   5   6  -7   89.09   17.40
   5   6  -7   97.79   20.30
   4  -6  -7   73.59   15.10
  -4  -6   7   99.59   19.20
   4  -6  -7  102.09   14.20
  -4  -6   7   95.69   19.60
   4   6  -7   71.29   21.80
  -4   6   7   94.59   13.10
   4   6  -7   91.39   16.70
   4   6  -7   67.59   19.80
  -3  -6   7  100.79   18.20
  -3  -6   7   53.29   19.90
   3  -6  -7   99.09   13.50
   3   6  -7  100.69   17.90
  -3   6   7   93.09   12.60
   3   6  -7   90.09   15.50
   3   6  -7   64.59   17.60
   2  -6  -7   42.20   13.10
   2  -6  -7   25.80    9.60
  -2  -6   7   45.80   18.80
   2  -6  -7   73.39   15.30
  -2  -6   7   60.69   17.00
   2   6  -7   65.09   16.50
   2   6  -7   37.10   13.00
   2   6  -7   31.00   16.90
  -1  -6   7   62.49   16.90
   1  -6  -7   44.20   16.10
  -1  -6   7    3.90   21.40
   1  -6  -7   27.70   10.60
   1  -6  -7   56.69   16.00
   1   6  -7   38.90   11.50
   1   6  -7   41.80   16.10
  -1   6   7   31.80   13.10
  -1   6   7   46.00   10.90
   1   6  -7   48.30   16.50
   0  -6  -7   64.89   12.80
   0  -6  -7   89.09   20.70
   0  -6   7   43.40   16.20
   0   6  -7   69.09   10.90
   0   6   7   27.80   13.60
   0   6  -7   54.29   17.10
   0   6  -7   89.29   18.50
   1  -6   7  186.98   21.80
  -1  -6  -7  161.38   20.40
   1  -6   7  197.38   25.70
   1   6   7  166.48   20.70
  -1   6  -7  193.78   23.90
  -1   6  -7  197.68   32.40
   2  -6   7   65.89   17.70
  -2  -6  -7   20.80   14.10
  -2  -6  -7   52.99   18.20
   2  -6   7   75.89   16.40
  -2   6  -7   56.79   15.70
   2   6   7   47.00   13.40
  -2   6  -7   55.29   19.40
 -17   0   8   20.60   15.50
 -17   0   8   31.10   34.70
  17   0  -8   16.10   29.80
  17   0  -8  -12.00   18.80
  16   0  -8  -37.80   15.60
 -16   0   8   22.40   12.90
 -16   0   8   -5.90   14.30
 -16   0   8   20.60   17.00
  16   0  -8   13.10   18.20
  16   0  -8   -0.50   19.80
  15   0  -8  254.17   24.90
 -15   0   8  218.38   20.10
  15   0  -8  213.88   27.80
 -15   0   8  190.78   35.60
 -15   0   8  222.08   22.60
  15   0  -8  218.98   26.10
  14   0  -8  112.39   15.40
 -14   0   8   79.29   18.10
  14   0  -8  150.38   17.60
 -14   0   8  107.19   15.20
  14   0  -8  104.99   21.40
 -13   0   8   44.80   13.50
  13   0  -8   54.69   13.20
 -13   0   8   27.30   12.60
  13   0  -8   38.20   13.80
  13   0  -8   35.90   17.90
 -13   0   8   33.10   16.70
 -12   0   8   19.90   16.10
  12   0  -8   10.80   12.30
 -12   0   8    8.70   10.30
  12   0  -8    3.40   11.80
  12   0  -8   25.10   21.60
 -12   0   8   -7.10   12.10
  11   0  -8  140.39   16.30
 -11   0   8  130.39   16.40
  11   0  -8  166.98   17.50
 -11   0   8  157.18   21.40
  11   0  -8  151.98   18.40
 -11   0   8  158.68   14.40
 -10   0   8  160.98   15.30
  10   0  -8  141.99   21.20
  10   0  -8  158.98   15.80
 -10   0   8  174.28   20.90
   9   0  -8   -3.80    8.20
   9   0  -8   15.90   12.70
  -9   0   8   -4.80    8.00
  -9   0   8  -11.90    6.80
  -9   0   8   -3.40   12.30
  -8   0   8  -11.10    7.20
   8   0  -8   18.70    7.50
   8   0  -8    4.60   11.50
   8   0  -8   -5.00    6.20
  -8   0   8   -5.50    6.10
  -7   0   8   32.30    7.40
   7   0  -8   32.60    7.10
  -7   0   8    9.00    6.40
   7   0  -8   28.00    6.20
   7   0  -8   39.20   11.40
  -6   0   8  269.37   16.80
   6   0  -8  285.87   21.60
   6   0  -8  261.37   16.30
   6   0  -8  281.97   16.50
   5   0  -8  518.05   27.50
  -5   0   8  541.85   27.90
   5   0  -8  531.55   31.00
   4   0  -8   54.59    7.70
  -4   0   8   58.79    7.20
   4   0  -8   53.39    7.30
  -4   0   8   71.39   10.80
   3   0  -8    7.10    6.30
   3   0  -8    4.70    6.50
  -3   0   8   15.60    6.10
  -3   0   8   -0.10    7.00
   2   0  -8    3.50    6.50
  -2   0   8   -3.80    7.30
   2   0  -8   -1.60    6.80
  -2   0   8    4.20    6.30
  -1   0   8    5.80    7.90
   1   0  -8   -0.90    7.40
   1   0  -8   -7.30    6.50
  -1   0   8   -1.50    6.80
   0   0   8  221.08   17.10
   0   0  -8  232.08   16.80
   0   0   8  220.88   16.10
   0   0  -8  212.08   15.80
   1   0   8  390.96   25.70
   1   0   8  400.36   23.90
  -1   0  -8  412.76   23.90
   2   0   8   25.90    9.10
  -2   0  -8   19.60    8.40
  -2   0  -8   31.70    9.90
   2   0   8   16.00    9.50
   3   0   8   -0.30    9.10
  -3   0  -8   -0.60    9.40
   3   0   8   10.20    9.90
  -3   0  -8    3.10    8.60
  -4   0  -8   26.40   10.70
   4   0   8    7.80   10.20
   4   0   8    3.90   11.00
  -4   0  -8   15.80   10.00
  -5   0  -8   13.40   10.40
   5   0   8    6.20   10.90
   5   0   8   13.80   11.80
  -5   0  -8   16.10   11.40
   6   0   8    2.80   12.70
  -6   0  -8   10.80   12.90
  -6   0  -8    5.80   12.40
  -6   0  -8   -6.50   11.00
   6   0   8   23.80   12.20
   7   0   8  -23.60   11.80
   7   0   8  -25.20   13.00
  -7   0  -8   -8.10   18.00
  -7   0  -8  -21.90   11.70
  -7   0  -8  -14.40   12.70
   8   0   8  -18.40   21.30
  -8   0  -8   -2.00   12.70
  -8   0  -8   -6.80   12.50
   8   0   8  -31.00   12.90
   9   0   8  133.79   19.30
   9   0   8   74.69   16.70
  -9   0  -8   66.39   16.80
  -9   0  -8   88.79   16.30
  -9   0  -8  112.39   18.10
 -10   0  -8    2.80   17.40
  10   0   8    9.80   16.30
  10   0   8  -40.20   14.90
 -10   0  -8   -4.50   14.30
 -10   0  -8  -24.70   15.00
 -11   0  -8   -1.10   16.30
  11   0   8    2.00   16.90
 -11   0  -8   -1.10   15.90
 -12   0  -8  -10.80   23.60
 -12   0  -8  -34.20   15.40
  12   0   8  -14.40   17.10
 -12   0  -8   16.40   20.90
  12   0   8    6.50   18.80
 -16  -1   8    6.90   17.40
  16  -1  -8   32.90   19.40
 -16  -1   8   38.00   19.80
  16  -1  -8   72.69   15.30
 -16   1   8   32.90   12.40
 -16   1   8   43.70   26.10
  16   1  -8   16.40   16.80
  16   1  -8   39.20   27.20
 -15  -1   8   -0.70   14.10
  15  -1  -8   34.60   13.50
 -15  -1   8   44.00   17.80
  15  -1  -8   19.20   17.40
 -15   1   8   27.90   18.50
 -15   1   8   18.20   11.60
  15   1  -8   13.40   15.40
  15   1  -8   -3.20   17.20
 -15   1   8   15.00   10.00
 -14  -1   8   61.59   21.70
  14  -1  -8   26.00   12.40
  14  -1  -8   16.00   12.30
  14  -1  -8   40.20   17.60
 -14  -1   8   19.20   13.70
 -14   1   8   10.00   10.90
 -14   1   8   11.50   16.60
  14   1  -8   32.00   17.60
  14   1  -8    5.10   14.60
  13  -1  -8  149.99   20.80
 -13  -1   8   91.79   17.70
  13  -1  -8  135.59   15.90
 -13  -1   8  126.49   16.30
 -13   1   8  158.58   13.40
 -13   1   8  121.99   17.00
  13   1  -8  122.49   17.50
  13   1  -8  122.99   16.60
  13   1  -8  110.29   20.20
 -13   1   8  132.59   19.60
 -12  -1   8  104.79   14.40
  12  -1  -8   90.19   17.10
 -12  -1   8  151.58   21.50
  12  -1  -8   83.39   11.70
  12   1  -8   96.19   14.60
  12   1  -8   72.69   14.70
  12   1  -8  100.09   18.90
 -12   1   8  113.99   12.20
 -12   1   8  114.89   17.30
 -12   1   8  133.39   14.40
  11  -1  -8    9.40   13.60
  11  -1  -8   34.90    9.20
 -11  -1   8   15.70   13.90
  11  -1  -8    5.70    8.00
 -11   1   8   17.80    7.90
 -11   1   8   19.10   13.60
  11   1  -8    7.40   13.30
  11   1  -8   23.90   18.60
  11   1  -8    4.00   11.40
  10  -1  -8  284.47   24.00
 -10  -1   8  315.27   21.60
 -10  -1   8  322.67   26.20
  10   1  -8  315.27   21.60
  10   1  -8  281.47   26.00
  -9  -1   8  511.05   33.20
   9  -1  -8  504.35   31.90
  -9  -1   8  541.15   29.80
  -9  -1   8  562.44   29.90
   9   1  -8  489.95   33.20
   9   1  -8  497.05   29.50
  -8  -1   8  168.98   15.20
   8  -1  -8  126.59   17.70
  -8  -1   8  125.79   15.90
  -8  -1   8  125.59   14.80
   8   1  -8  142.19   17.60
   8   1  -8  115.49   13.40
   8   1  -8  128.29   14.20
  -7  -1   8  376.66   25.80
  -7  -1   8  409.96   23.10
  -7  -1   8  404.26   23.50
   7  -1  -8  404.96   25.60
   7   1  -8  376.26   26.50
   7   1  -8  355.96   22.80
   7   1  -8  359.36   22.40
   6  -1  -8   47.20   11.10
  -6  -1   8   36.70    8.90
  -6  -1   8   55.89    9.00
   6   1  -8   61.79   13.10
   6   1  -8   49.20    8.30
   6   1  -8   51.09    8.80
  -5  -1   8  167.58   15.40
   5  -1  -8  163.68   16.30
  -5  -1   8  171.88   14.90
   5   1  -8  191.78   14.70
   5   1  -8  205.58   18.90
   5   1  -8  169.48   14.00
  -4  -1   8  516.45   26.90
  -4  -1   8  522.15   27.20
   4  -1  -8  496.25   24.80
   4  -1  -8  455.95   25.10
  -4   1   8  502.75   25.20
   4   1  -8  493.45   27.40
  -4   1   8  482.65   24.60
   4   1  -8  478.25   26.70
   4   1  -8  460.75   29.20
  -3  -1   8  171.68   13.50
  -3  -1   8  155.38   14.70
   3  -1  -8  156.78   11.30
   3  -1  -8  138.69   12.10
  -3   1   8  157.58   11.00
   3   1  -8  161.28   16.70
   3   1  -8  158.98   14.50
  -3   1   8  169.18   12.50
   3   1  -8  163.18   13.50
   2  -1  -8  132.19   11.60
  -2  -1   8  110.59   12.70
  -2  -1   8  132.79   13.50
   2  -1  -8  109.59   12.00
   2   1  -8  141.49   13.80
  -2   1   8  133.39   11.10
   2   1  -8  125.39   12.80
  -1  -1   8  298.07   19.30
   1  -1  -8  284.57   18.20
  -1  -1   8  271.87   18.40
   1  -1  -8  298.87   18.10
  -1   1   8  303.37   18.50
  -1   1   8  273.67   17.70
   1   1  -8  285.77   18.60
   1   1  -8  238.08   24.90
   0  -1  -8  596.94   29.90
   0  -1   8  521.45   29.70
   0  -1  -8  518.35   29.60
   0  -1   8  541.55   30.30
   0   1  -8  547.15   29.80
   0   1   8  511.25   29.30
   0   1   8  585.54   30.10
   0   1  -8  530.75   30.30
  -1  -1  -8   54.39    9.30
   1  -1   8   49.20    9.90
  -1  -1  -8   50.29   10.10
   1  -1   8   34.80    9.00
   1   1   8   47.40    9.10
   1   1   8   48.90    9.90
  -1   1  -8   50.49    9.80
  -1   1  -8   51.49    9.10
  -2  -1  -8  524.65   31.60
   2  -1   8  561.44   31.70
   2  -1   8  552.34   32.20
   2   1   8  554.24   31.60
   2   1   8  614.94   34.10
  -2   1  -8  602.74   31.60
  -2   1  -8  589.34   32.30
   3  -1   8  136.29   16.20
  -3  -1  -8  114.89   13.50
  -3  -1  -8  122.69   13.00
   3  -1   8  122.59   15.00
   3   1   8  100.79   12.40
   3   1   8  102.69   13.20
  -3   1  -8  115.29   14.40
  -3   1  -8   97.69   12.70
  -4  -1  -8  159.28   17.30
  -4  -1  -8  172.68   18.80
   4  -1   8  170.78   17.30
   4  -1   8  145.89   17.70
  -4   1  -8  153.08   18.10
   4   1   8  157.88   17.30
  -4   1  -8  183.28   16.90
   4   1   8  142.49   18.60
   5  -1   8  300.57   22.30
  -5  -1  -8  246.48   22.00
  -5  -1  -8  277.17   24.00
   5  -1   8  264.57   23.00
  -5  -1  -8  292.07   23.70
   5   1   8  309.77   23.40
  -5   1  -8  271.77   22.90
   5   1   8  290.47   22.30
  -5   1  -8  305.77   22.00
  -6  -1  -8  398.46   28.40
   6  -1   8  441.36   28.60
   6  -1   8  445.16   29.60
  -6  -1  -8  420.46   29.90
  -6   1  -8  429.06   28.50
   6   1   8  424.16   29.50
  -6   1  -8  430.86   28.90
   6   1   8  429.36   28.70
  -7  -1  -8  288.07   24.80
  -7  -1  -8  293.97   26.40
   7  -1   8  301.97   26.70
   7  -1   8  304.17   24.80
  -7  -1  -8  295.07   26.60
   7   1   8  286.07   25.00
  -7   1  -8  322.27   28.00
  -7   1  -8  304.87   24.60
   7   1   8  289.17   26.00
  -7   1  -8  330.97   25.90
   8  -1   8   89.39   16.60
   8  -1   8   74.19   15.20
  -8  -1  -8   99.99   18.00
  -8  -1  -8   57.19   14.80
  -8  -1  -8   78.49   17.30
   8   1   8   81.89   16.60
  -8   1  -8   81.79   14.90
   8   1   8   62.79   16.40
  -8   1  -8  101.99   16.50
  -8   1  -8   86.19   17.10
  -9  -1  -8   13.00   16.30
   9  -1   8   37.50   15.40
  -9  -1  -8   14.90   16.10
   9  -1   8   24.70   15.90
  -9  -1  -8   38.20   26.00
  -9   1  -8   29.80   14.20
  -9   1  -8   26.70   15.50
  -9   1  -8   39.20   15.30
   9   1   8   36.70   16.50
 -10  -1  -8   66.29   16.00
 -10  -1  -8   66.89   17.00
  10  -1   8  102.49   18.20
 -10  -1  -8   88.69   18.80
  10  -1   8   81.19   27.70
 -10   1  -8   79.49   17.20
  10   1   8   52.99   17.10
 -10   1  -8   90.69   16.80
  10   1   8   73.49   19.00
 -10   1  -8   78.29   17.70
 -11  -1  -8   49.20   18.60
  11  -1   8   35.40   17.90
 -11  -1  -8   19.90   15.80
  11  -1   8   56.59   17.80
 -11  -1  -8   27.80   18.60
 -11   1  -8   56.29   27.80
 -11   1  -8   48.90   17.30
 -11   1  -8   46.90   16.40
  11   1   8   37.90   19.80
  12  -1   8    4.10   19.30
 -12  -1  -8    4.40   19.20
 -12  -1  -8   -4.90   18.90
 -12  -1  -8   -2.10   15.60
  12   1   8   -0.60   18.40
 -12   1  -8   -7.60   17.10
 -12   1  -8  -16.50   18.10
  12   1   8  -32.40   18.40
 -12   1  -8   -8.20   17.30
 -16  -2   8   17.60   18.50
  16  -2  -8   30.20   18.50
 -16  -2   8    7.00   16.50
  16   2  -8   19.30   17.90
  16   2  -8    9.10   21.20
  16   2  -8   41.00   18.20
 -15  -2   8   60.79   16.90
 -15  -2   8   76.89   19.50
 -15  -2   8   78.09   19.80
  15  -2  -8   66.79   18.70
  15   2  -8   35.10   21.30
  15   2  -8   67.39   18.30
  14  -2  -8   12.60   16.80
 -14  -2   8   -4.40   15.20
 -14  -2   8   10.10   15.80
 -14  -2   8   17.30   14.10
  14   2  -8   26.60   16.50
  14   2  -8   11.20   15.50
  14   2  -8    8.90   18.80
  13  -2  -8  155.28   21.90
 -13  -2   8  130.09   17.90
 -13  -2   8  141.59   24.50
 -13  -2   8  154.38   17.70
  13   2  -8  167.68   24.00
  13   2  -8  139.19   18.60
 -12  -2   8  361.16   29.60
 -12  -2   8  333.67   26.80
 -12  -2   8  357.06   26.40
  12  -2  -8  339.17   21.20
  12  -2  -8  345.77   26.90
  12   2  -8  375.66   28.60
  12   2  -8  354.56   30.90
  12   2  -8  353.86   26.70
  11  -2  -8  236.98   22.80
 -11  -2   8  277.97   23.10
 -11  -2   8  289.37   25.70
  11   2  -8  263.87   28.10
  11   2  -8  261.17   22.90
  10  -2  -8   32.50   12.60
 -10  -2   8   47.00   13.20
 -10  -2   8   30.60   14.60
  10   2  -8   16.50   17.20
  10   2  -8   10.50   12.00
   9  -2  -8  166.58   18.70
  -9  -2   8  148.89   20.50
  -9  -2   8  155.78   18.60
  -9  -2   8  155.08   18.00
   9   2  -8  135.59   17.60
   9   2  -8  148.49   19.30
  -8  -2   8  367.86   23.50
  -8  -2   8  315.27   25.00
   8  -2  -8  339.77   23.60
  -8  -2   8  326.47   23.10
   8   2  -8  310.47   26.00
   8   2  -8  307.77   22.20
   8   2  -8  312.27   22.60
   7  -2  -8   61.49   11.30
  -7  -2   8   58.19   11.60
  -7  -2   8   63.69   11.10
  -7  -2   8   60.29   14.00
   7   2  -8   38.10   10.30
   7   2  -8   48.40   10.90
   7   2  -8   63.59   13.70
  -6  -2   8  458.35   26.40
   6  -2  -8  455.35   26.80
  -6  -2   8  444.26   26.80
   6   2  -8  404.96   26.10
   6   2  -8  434.26   25.90
   6   2  -8  411.26   28.40
  -5  -2   8  186.68   17.80
  -5  -2   8  202.78   17.10
   5   2  -8  221.28   17.50
   5   2  -8  204.78   16.30
   5   2  -8  212.78   19.30
  -4  -2   8  456.85   27.30
   4   2  -8  516.75   29.40
   4   2  -8  448.86   27.10
   3  -2  -8  597.64   29.80
   3  -2  -8  579.44   29.80
  -3  -2   8  615.94   32.20
  -3  -2   8  558.34   32.20
   3   2  -8  619.14   33.90
  -3   2   8  577.04   29.50
   3   2  -8  561.34   32.00
   3   2  -8  579.54   32.90
  -2  -2   8  361.46   22.40
   2  -2  -8  320.27   20.50
   2  -2  -8  372.86   20.50
  -2  -2   8  351.96   22.40
   2   2  -8  366.46   22.30
   2   2  -8  346.77   23.20
  -2   2   8  363.56   20.10
  -2   2   8  353.36   19.90
   2   2  -8  374.56   23.40
  -1  -2   8  272.17   18.60
   1  -2  -8  231.78   17.10
   1  -2  -8  276.87   17.50
  -1  -2   8  269.77   18.40
   1   2  -8  247.48   19.10
   1   2  -8  252.47   18.10
  -1   2   8  228.78   16.40
   0  -2  -8  172.48   15.40
   0  -2   8  159.08   15.70
   0  -2  -8  129.69   14.50
   0  -2   8  167.58   15.00
   0   2  -8  135.59   16.30
   0   2  -8  157.38   15.00
   0   2   8  134.49   13.80
   0   2   8  154.18   14.70
  -1  -2  -8  281.57   20.50
   1  -2   8  260.77   19.70
   1  -2   8  321.87   20.60
  -1  -2  -8  280.47   19.50
   1   2   8  241.58   19.10
  -1   2  -8  296.07   21.00
   1   2   8  262.47   20.10
  -1   2  -8  287.97   20.00
   2  -2   8  678.83   37.20
   2  -2   8  680.73   37.30
  -2  -2  -8  699.23   37.90
  -2  -2  -8  613.84   36.70
  -2   2  -8  680.03   37.80
  -2   2  -8  687.03   37.00
   2   2   8  681.13   37.60
   2   2   8  702.53   37.00
   3  -2   8   52.89   11.70
  -3  -2  -8   59.29   13.20
  -3  -2  -8   54.49   11.00
   3  -2   8   58.49   11.00
   3   2   8   43.00   12.10
   3   2   8   48.30   11.40
  -3   2  -8   57.99   11.00
  -3   2  -8   77.29   12.60
  -4  -2  -8  152.78   20.30
   4  -2   8  140.09   15.00
   4  -2   8  158.88   18.50
  -4  -2  -8  184.18   18.00
  -4  -2  -8  134.49   14.90
  -4   2  -8  156.88   17.40
   4   2   8  120.09   15.30
   4   2   8  151.18   16.20
  -4   2  -8  155.68   18.90
  -5  -2  -8  119.99   17.20
   5  -2   8  101.09   14.70
   5  -2   8   92.79   13.80
  -5  -2  -8   91.29   14.00
   5   2   8   99.89   15.50
  -5   2  -8  111.49   13.70
   5   2   8   74.59   14.60
  -5   2  -8  101.29   14.70
   6  -2   8  200.58   20.60
  -6  -2  -8  192.08   23.00
  -6  -2  -8  162.98   18.60
  -6  -2  -8  180.58   23.50
   6  -2   8   95.09   22.40
   6   2   8  179.58   22.70
  -6   2  -8  210.88   20.10
  -6   2  -8  160.38   23.80
   6   2   8  183.18   21.90
  -7  -2  -8   58.09   17.50
  -7  -2  -8   43.00   15.00
   7  -2   8   45.60   13.80
  -7  -2  -8   37.80   18.20
   7  -2   8   46.90   14.30
   7   2   8   50.09   16.80
  -7   2  -8   54.29   13.70
   7   2   8   24.90   15.30
  -7   2  -8   69.89   15.40
  -7   2  -8   61.59   13.80
  -8  -2  -8  -23.40   16.10
  -8  -2  -8  -21.50   12.70
   8  -2   8   27.70   15.10
  -8  -2  -8    9.60   15.70
   8  -2   8    1.80   13.80
   8   2   8  -33.40   14.50
  -8   2  -8    4.80   13.20
  -8   2  -8    8.70   13.30
  -8   2  -8   -7.10   13.70
   8   2   8  -14.90   15.40
  -9  -2  -8   18.60   15.90
  -9  -2  -8   19.10   14.10
  -9  -2  -8   29.40   17.90
   9  -2   8   17.70   15.10
   9   2   8   43.60   16.90
  -9   2  -8   33.10   15.70
  -9   2  -8   25.00   15.20
  -9   2  -8   34.90   15.30
   9   2   8   25.60   16.40
  10  -2   8    4.80   15.20
 -10  -2  -8   -5.90   14.50
 -10  -2  -8   -8.40   19.30
 -10  -2  -8   16.10   18.50
  10  -2   8   21.00   17.60
 -10   2  -8  -13.20   16.00
  10   2   8   19.60   17.20
 -10   2  -8    2.50   15.60
  10   2   8  -24.70   18.50
 -10   2  -8   14.90   15.70
 -11  -2  -8   36.40   27.70
  11  -2   8   19.30   17.00
 -11  -2  -8   31.20   19.30
 -11  -2  -8   11.30   18.30
 -11   2  -8   22.40   15.60
 -11   2  -8   52.19   17.90
 -11   2  -8    7.10   18.70
  11   2   8    6.40   20.10
 -15  -3   8    4.00   16.90
 -15  -3   8   -5.60   17.00
  15  -3  -8   22.70   20.20
  15   3  -8   70.39   24.00
  15   3  -8   -5.40   18.20
  15   3  -8   -0.70   20.90
 -14  -3   8   28.50   28.20
 -14  -3   8    8.20   15.60
  14  -3  -8    5.60   14.80
  14   3  -8   17.50   22.00
  14   3  -8   -1.20   16.60
 -13  -3   8    1.10   14.90
 -13  -3   8   23.10   18.30
  13  -3  -8   19.80   14.20
  13   3  -8  -21.40   19.30
  13   3  -8  -18.80   16.10
  12  -3  -8   22.90   13.20
 -12  -3   8   21.50   14.90
  12   3  -8    5.50   17.70
  12   3  -8   16.20   15.60
 -11  -3   8   -1.60   14.10
 -11  -3   8   -4.80   16.20
  11  -3  -8   16.20   12.10
  11   3  -8  -11.70   17.10
  11   3  -8  -13.80   13.80
 -10  -3   8  171.48   21.10
 -10  -3   8  125.09   18.90
  10  -3  -8  176.68   18.10
 -10  -3   8  170.98   21.70
  10   3  -8  150.88   19.00
  10   3  -8  150.58   18.50
  10   3  -8  165.48   22.90
   9  -3  -8  195.78   17.50
  -9  -3   8  185.58   21.00
  -9  -3   8  157.88   21.90
  -9  -3   8  177.18   19.30
   9   3  -8  105.29   20.30
   9   3  -8  159.58   20.40
   9   3  -8  135.39   20.60
   8  -3  -8  116.29   14.70
  -8  -3   8   74.99   14.80
  -8  -3   8   83.29   18.00
  -8  -3   8  125.69   20.10
   8   3  -8   92.29   14.60
   8   3  -8   71.69   14.10
   8   3  -8   95.09   18.00
  -7  -3   8   31.00   14.00
  -7  -3   8   10.80   11.70
   7  -3  -8   -5.20    9.10
  -7  -3   8   12.70   12.00
   7   3  -8   -0.80   10.70
   7   3  -8    9.50   11.70
   7   3  -8    6.60   14.40
   6  -3  -8  292.67   21.60
  -6  -3   8  361.06   24.30
  -6  -3   8  345.57   24.70
   6   3  -8  298.87   23.20
   6   3  -8  333.57   24.10
   6   3  -8  362.66   25.90
  -5  -3   8  406.76   25.90
  -5  -3   8  417.56   26.70
   5   3  -8  379.36   27.60
   5   3  -8  388.36   25.30
   5   3  -8  359.36   26.10
  -4  -3   8  263.27   21.60
   4  -3  -8  282.57   16.10
  -4  -3   8  237.28   20.70
   4   3  -8  245.68   20.40
   4   3  -8  285.27   21.60
   4   3  -8  288.37   22.70
   3  -3  -8  336.17   19.60
   3  -3  -8  334.57   18.50
  -3  -3   8  297.67   22.70
   3   3  -8  337.67   24.00
  -3   3   8  332.77   18.90
   3   3  -8  297.67   22.40
   2  -3  -8  467.75   24.80
  -2  -3   8  442.06   27.50
  -2  -3   8  420.26   27.40
   2  -3  -8  436.46   25.40
  -2   3   8  400.66   24.20
  -2   3   8  466.35   25.00
   2   3  -8  458.35   27.80
   2   3  -8  447.46   27.20
   2   3  -8  432.16   28.90
   1  -3  -8  446.46   26.80
   1  -3  -8  470.55   27.60
  -1  -3   8  479.65   28.60
  -1  -3   8  477.35   28.50
   1   3  -8  495.35   28.50
   1   3  -8  481.05   28.40
   1   3  -8  441.06   29.80
  -1   3   8  445.06   26.40
   0  -3   8  367.86   24.70
   0  -3  -8  403.36   24.80
   0  -3  -8  350.06   23.70
   0  -3   8  375.96   24.80
   0   3  -8  357.56   26.50
   0   3  -8  379.46   24.70
   0   3   8  396.16   23.50
   0   3  -8  384.26   24.20
   0   3   8  328.27   22.70
   1  -3   8   77.79   12.80
  -1  -3  -8   78.69   12.00
   1  -3   8   92.09   13.00
  -1  -3  -8  116.39   14.40
  -1   3  -8   90.99   12.60
   1   3   8   85.59   12.30
   1   3   8  114.39   12.90
  -1   3  -8   98.89   14.20
   2  -3   8   21.20   10.80
   2  -3   8   21.40   11.40
  -2  -3  -8   28.30   11.20
  -2  -3  -8   30.00   13.20
  -2  -3  -8   29.80   14.00
  -2   3  -8   26.40   11.00
  -2   3  -8   23.50   12.50
   2   3   8   24.40   11.80
   2   3   8   26.40   10.90
  -3  -3  -8  127.59   22.20
  -3  -3  -8  163.08   20.60
   3  -3   8  151.48   18.40
   3  -3   8  155.58   19.50
  -3  -3  -8  170.68   18.30
  -3   3  -8  131.09   16.30
   3   3   8  134.19   15.90
  -3   3  -8  145.19   17.80
   4  -3   8   29.50   16.10
   4  -3   8   52.59   12.40
  -4  -3  -8   50.79   12.90
  -4  -3  -8   60.99   19.40
  -4  -3  -8   55.89   15.70
   4   3   8   62.59   14.40
   4   3   8   35.50   13.90
  -4   3  -8   65.79   12.60
  -4   3  -8   59.99   18.50
  -5  -3  -8   20.10   12.60
  -5  -3  -8    6.80   15.50
  -5  -3  -8   14.70   13.50
   5  -3   8   30.10   13.60
   5  -3   8   25.40   11.90
  -5   3  -8   43.00   14.00
   5   3   8   30.80   14.10
  -5   3  -8   29.30   12.40
   5   3   8   30.60   14.20
  -6  -3  -8   21.20   16.20
  -6  -3  -8    7.00   17.10
  -6  -3  -8    3.80   12.90
   6  -3   8   -6.90   13.50
   6  -3   8   17.80   12.70
  -6   3  -8    5.60   11.90
  -6   3  -8   19.80   13.60
   6   3   8  -12.90   14.70
   6   3   8  -18.10   14.00
  -6   3  -8    2.10   12.00
   7  -3   8  168.78   22.50
   7  -3   8  208.08   22.70
  -7  -3  -8  179.48   22.40
  -7  -3  -8  186.68   26.20
  -7  -3  -8  176.58   20.00
   7   3   8  227.28   25.00
  -7   3  -8  194.68   23.70
   7   3   8  188.48   20.80
  -7   3  -8  189.68   20.50
   8  -3   8   34.00   15.60
  -8  -3  -8   27.30   28.40
  -8  -3  -8   22.70   18.40
   8  -3   8   30.60   14.50
  -8  -3  -8   39.30   15.00
   8   3   8   59.29   18.90
   8   3   8   45.10   17.10
  -8   3  -8   38.50   14.40
  -8   3  -8   21.90   15.30
  -8   3  -8   32.20   14.90
  -9  -3  -8   -4.50   18.20
   9  -3   8   18.80   15.20
   9  -3   8   -5.70   15.50
  -9  -3  -8   25.10   15.80
  -9   3  -8   27.90   15.70
   9   3   8  -11.10   17.60
  -9   3  -8   14.00   17.80
  -9   3  -8   -5.20   13.90
   9   3   8   25.70   17.60
 -10  -3  -8   -1.50   19.80
 -10  -3  -8  -14.20   18.70
  10  -3   8  -13.80   15.60
  10  -3   8  -13.90   17.20
 -10  -3  -8  -15.00   15.10
  10   3   8  -14.30   17.10
 -10   3  -8  -10.70   14.50
 -10   3  -8    9.20   15.60
  10   3   8  -12.80   17.00
 -10   3  -8    3.20   16.90
 -13  -4   8    9.40   17.50
  13  -4  -8   30.30   11.90
 -13  -4   8   21.20   22.50
 -13  -4   8    8.90   19.00
  13   4  -8   17.00   18.90
  13   4  -8    5.60   20.80
  13   4  -8   25.50   22.50
 -12  -4   8   68.89   19.40
  12  -4  -8   89.59   13.20
 -12  -4   8   51.49   19.10
 -12  -4   8   43.50   18.20
  12   4  -8   49.40   20.40
  12   4  -8   42.90   21.90
  12   4  -8   73.09   20.60
 -11  -4   8   15.70   16.90
  11  -4  -8   36.00   10.80
 -11  -4   8   -1.30   17.80
  11   4  -8   24.30   17.50
  11   4  -8   -4.30   16.20
  11   4  -8    9.30   18.70
 -10  -4   8   89.59   26.80
 -10  -4   8   52.19   17.00
 -10  -4   8   72.69   18.60
  10  -4  -8  108.09   13.80
  10   4  -8   62.79   18.40
  10   4  -8   69.29   18.10
  10   4  -8   84.29   21.10
   9  -4  -8  101.69   11.90
  -9  -4   8  119.19   19.10
  -9  -4   8  103.99   18.00
  -9  -4   8   87.99   18.90
   9   4  -8   60.29   16.50
   9   4  -8   72.49   17.00
   9   4  -8   80.09   19.10
   8  -4  -8   54.89   10.40
  -8  -4   8   82.59   17.20
  -8  -4   8   46.10   15.60
  -8  -4   8   68.19   16.30
   8   4  -8   61.89   18.70
   8   4  -8   55.19   16.30
   8   4  -8   41.40   15.20
   7  -4  -8   95.99   13.00
  -7  -4   8   59.89   15.20
  -7  -4   8   85.39   20.50
  -7  -4   8   84.99   16.60
   7   4  -8   85.99   33.60
   7   4  -8   76.09   17.60
   7   4  -8   54.69   15.70
  -6  -4   8  475.65   33.40
   6  -4  -8  536.05   28.50
  -6  -4   8  488.15   33.20
   6   4  -8  520.85   33.10
   6   4  -8  491.45   34.30
   6   4  -8  498.35   32.60
  -5  -4   8   11.20   12.50
   5  -4  -8    0.50    5.50
   5   4  -8    4.40   13.40
   5   4  -8   -1.40   13.70
   5   4  -8    0.90   11.50
  -4  -4   8   26.20   13.30
  -4  -4   8   21.00   12.60
   4  -4  -8   22.90    9.10
  -4   4   8   33.70    9.00
  -4   4   8   25.00    6.40
   4   4  -8   35.60   14.40
   4   4  -8   23.30   14.20
   4   4  -8   15.50   11.90
  -3  -4   8   37.20   12.60
   3  -4  -8   13.40    9.90
  -3  -4   8   49.80   13.60
   3   4  -8   41.40   13.50
   3   4  -8   46.60   12.30
   3   4  -8   36.30   13.80
   2  -4  -8   30.60   11.20
  -2  -4   8   35.80   12.60
   2   4  -8   46.20   13.10
   2   4  -8   43.90   12.50
  -2   4   8   32.70    9.50
   1  -4  -8   26.60   11.90
   1  -4  -8   47.10   10.50
   1  -4  -8   24.80   12.00
  -1  -4   8   38.10   16.70
   1   4  -8   42.90   12.40
  -1   4   8   32.30   10.10
   1   4  -8   16.30   11.80
   0  -4  -8   55.39   12.90
   0  -4   8   64.29   14.60
   0  -4   8   42.50   12.90
   0  -4  -8   45.70   13.10
   0  -4  -8   39.70   11.50
   0   4   8   45.10   11.40
   0   4   8   44.70   11.80
   0   4  -8   63.99   12.70
   0   4  -8   57.69   16.40
   0   4  -8   53.09   12.50
   1  -4   8  179.88   20.20
  -1  -4  -8  161.98   19.70
  -1  -4  -8  178.58   21.00
   1  -4   8  197.08   20.20
  -1  -4  -8  178.58   20.40
   1   4   8  161.38   19.20
  -1   4  -8  174.28   18.40
  -1   4  -8  182.58   19.90
   1   4   8  182.18   19.30
  -1   4  -8  206.38   20.90
  -2  -4  -8  113.89   17.90
   2  -4   8   99.89   16.10
  -2  -4  -8  103.69   15.50
   2  -4   8  161.98   17.10
  -2   4  -8  135.89   15.80
   2   4   8  113.69   16.50
  -2   4  -8  159.68   18.80
  -2   4  -8  132.99   16.40
   2   4   8  142.99   18.50
  -3  -4  -8  106.69   17.60
  -3  -4  -8   90.39   15.30
   3  -4   8  116.89   15.40
  -3  -4  -8   90.39   16.40
   3  -4   8  102.69   16.80
   3   4   8   99.69   15.40
   3   4   8  106.19   16.50
  -3   4  -8  126.89   17.90
  -3   4  -8  116.19   16.00
  -3   4  -8  117.49   13.70
   4  -4   8   86.09   15.50
   4  -4   8   87.69   15.10
  -4  -4  -8   94.89   18.40
  -4  -4  -8   66.49   15.40
  -4  -4  -8   89.39   18.10
  -4   4  -8   72.19   14.30
   4   4   8   99.09   16.70
   4   4   8   71.89   14.70
  -4   4  -8   76.59   16.70
  -5  -4  -8  117.19   20.80
   5  -4   8   79.89   15.40
   5  -4   8  139.99   24.80
  -5  -4  -8  123.29   19.50
   5   4   8   98.09   17.10
  -5   4  -8   90.89   16.20
  -5   4  -8  100.19   17.80
   5   4   8  135.39   18.70
  -6  -4  -8   54.79   20.80
  -6  -4  -8   85.99   17.30
  -6  -4  -8   65.19   18.50
   6  -4   8   81.59   15.30
   6  -4   8   77.09   17.30
  -6   4  -8   95.69   13.80
  -6   4  -8   87.09   16.80
  -6   4  -8   71.99   17.60
   6   4   8  123.39   18.30
   6   4   8   66.99   17.70
  -7  -4  -8   15.80   17.40
  -7  -4  -8   11.60   17.60
   7  -4   8   -5.20   13.60
  -7  -4  -8    0.60   14.50
   7  -4   8    9.50   15.20
  -7   4  -8   -0.90   12.80
   7   4   8   10.40   16.60
  -7   4  -8    3.50   15.70
   7   4   8    8.80   16.60
  -7   4  -8   -9.00   11.60
   8  -4   8  198.68   24.30
  -8  -4  -8  221.38   29.00
  -8  -4  -8  186.98   23.70
  -8  -4  -8  128.89   19.90
   8   4   8  263.97   37.50
  -8   4  -8  157.58   21.90
  -8   4  -8  195.38   20.70
  -8   4  -8  248.88   30.40
   8   4   8  179.88   25.60
 -10  -5   8   31.30   20.30
 -10  -5   8   13.50   16.40
  10   5  -8   16.40   17.90
  10   5  -8   22.10   18.80
  -9  -5   8   67.69   20.30
  -9  -5   8   63.29   17.90
   9   5  -8   26.60   18.00
   9   5  -8   60.99   18.30
   9   5  -8   64.49   18.80
  -8  -5   8   72.39   17.60
  -8  -5   8   49.10   17.80
  -8  -5   8   64.99   18.00
   8   5  -8   53.49   17.80
   8   5  -8   78.49   17.90
   8   5  -8   26.70   17.50
   7  -5  -8    0.50    8.30
  -7  -5   8   11.90   15.90
   7  -5  -8   11.30    8.50
  -7  -5   8    5.70   15.80
   7   5  -8   12.10   16.40
   7   5  -8   32.00   14.80
   7   5  -8   25.40   16.10
   6  -5  -8   92.69   12.90
  -6  -5   8   76.89   17.30
   6  -5  -8   92.89   10.00
  -6  -5   8  108.89   17.90
   6  -5  -8   53.89   13.10
   6   5  -8   90.19   16.60
   6   5  -8  110.79   19.80
   6   5  -8   87.19   17.80
  -5  -5   8   36.60   15.80
   5  -5  -8   37.80    8.00
   5  -5  -8   10.50    8.30
  -5  -5   8   27.60   15.10
   5  -5  -8   57.29    9.40
  -5   5   8   30.30   10.00
  -5   5   8   31.90    8.20
   5   5  -8   21.20   15.20
   5   5  -8   18.40   14.70
   5   5  -8   16.10   15.20
   4  -5  -8   98.49   13.50
   4  -5  -8   76.39   11.10
  -4  -5   8   75.09   16.60
  -4  -5   8   90.89   16.40
   4  -5  -8   98.39   11.40
   4   5  -8   82.19   16.40
   4   5  -8   84.89   16.80
   4   5  -8   71.89   15.40
  -4   5   8   92.89   13.20
  -3  -5   8   43.00   15.20
  -3  -5   8   37.80   14.50
   3  -5  -8   49.10   13.20
   3  -5  -8   64.89   11.60
   3  -5  -8   69.39   11.70
   3   5  -8   77.39   16.50
   3   5  -8   56.39   14.80
  -3   5   8   57.39   11.40
   3   5  -8   59.19   15.30
  -3   5   8   61.19   10.40
  -2  -5   8   13.50   14.00
   2  -5  -8   -0.80   10.30
  -2  -5   8    2.20   13.30
   2  -5  -8   -3.30   11.20
   2   5  -8    0.60   12.90
   2   5  -8    9.30   15.70
  -2   5   8   -6.80   10.50
   2   5  -8    0.70   13.20
  -1  -5   8   11.00   13.10
   1  -5  -8    3.70   12.70
   1  -5  -8   11.70   11.40
  -1  -5   8   10.30   14.30
   1   5  -8   10.80   15.30
   1   5  -8    5.60   13.10
  -1   5   8   -4.60   10.20
   1   5  -8    3.00   12.10
   0  -5  -8    3.70   11.80
   0  -5   8   12.00   16.10
   0  -5  -8    7.20   12.90
   0  -5  -8   -3.70   12.40
   0   5   8    2.30   11.60
   0   5  -8   15.80   13.20
   0   5  -8    4.00   11.60
  -1  -5  -8   10.10   13.10
  -1  -5  -8   23.90   13.60
  -1  -5  -8   28.70   14.50
   1   5   8   47.30   12.50
  -1   5  -8   15.10   14.60
   1   5   8    5.70   12.90
  -1   5  -8   27.10   11.60
  -2  -5  -8   22.20   14.20
  -2  -5  -8   11.10   13.60
   2  -5   8   38.50   15.50
  -2  -5  -8   -3.60   15.30
   2   5   8   -1.90   11.40
   2   5   8   20.90   21.40
  -2   5  -8   13.40   13.70
  -2   5  -8   12.30   10.50
   3  -5   8   94.79   17.60
   3  -5   8   67.69   16.10
  -3  -5  -8   40.00   17.30
  -3  -5  -8   65.89   15.70
  -3  -5  -8   59.59   15.70
  -3   5  -8   54.59   18.40
   3   5   8   40.60   16.70
  -3   5  -8   70.89   11.70
  -3   5  -8   72.19   16.50
   3   5   8   83.49   16.10
  -4  -5  -8   70.39   20.20
  -4  -5  -8   71.89   18.00
   4  -5   8   94.29   17.00
  -4  -5  -8   62.09   17.00
   4  -5   8   70.59   17.20
  -4   5  -8   87.39   20.50
   4   5   8  113.89   17.50
  -4   5  -8   92.79   13.40
  -4   5  -8   77.69   15.30
  -5  -5  -8   94.29   24.40
  -5  -5  -8  106.29   22.40
  -5  -5  -8   73.79   20.00
   5  -5   8  101.89   17.60
  -5   5  -8  110.79   13.90
   5   5   8  165.98   19.90
  -5   5  -8   91.29   12.20
   5   5   8   83.69   18.70
  -5   5  -8  111.29   19.10
  -5   5  -8  145.39   23.70
  -6  -5  -8   15.20   17.40
  -6  -5  -8   20.30   16.10
   6  -5   8   22.40   15.50
   6  -5   8   -8.70   17.40
  -6  -5  -8   19.20   21.10
  -6   5  -8   16.30   17.20
   6   5   8   57.89   17.80
  -6   5  -8   -0.10   13.80
   6   5   8   50.59   17.20
  -6   5  -8   18.60    9.30
  -6   5  -8   44.50   11.40
  -5  -6   8   32.00   17.50
   5  -6  -8   49.20   11.10
   5   6  -8   28.20   16.10
   5   6  -8   13.80   17.90
   5   6  -8   -1.50   16.00
   4  -6  -8   53.59   13.30
  -4  -6   8   58.29   19.20
   4  -6  -8   35.50   13.20
   4  -6  -8   70.09   12.40
   4   6  -8   64.79   19.30
   4   6  -8   61.29   17.80
  -4   6   8   69.09   11.00
   4   6  -8   55.09   15.90
  -3  -6   8   48.70   16.90
   3  -6  -8   37.00   12.30
   3  -6  -8   34.20    9.60
   3  -6  -8   59.19   12.80
   3   6  -8   44.60   15.00
   3   6  -8   50.39   17.60
  -3   6   8   53.99   12.30
   2  -6  -8   13.60   10.10
  -2  -6   8   16.00   15.40
   2  -6  -8   17.10   13.70
   2  -6  -8   24.00   14.60
   2   6  -8   46.00   18.10
   2   6  -8   23.60   12.90
  -2   6   8   28.20   11.20
   2   6  -8   16.40   15.20
  -2   6   8   13.00   11.60
  -1  -6   8   29.10   15.90
   1  -6  -8    3.10   14.40
   1  -6  -8  -10.90   10.50
   1   6  -8   25.10   16.80
  -1   6   8    3.30   13.40
   1   6  -8    5.60   14.40
   1   6  -8   16.90   11.60
  -1   6   8   18.20   14.40
   0  -6   8   25.70   15.70
   0  -6  -8   -3.50   17.80
   0  -6   8   -3.60   15.20
   0  -6  -8    1.60   11.50
   0   6  -8    3.10    9.80
   0   6  -8   15.50   14.70
   0   6  -8   68.29   23.80
   0   6   8   -5.00   12.70
   1  -6   8   33.90   16.40
   1  -6   8   41.10   16.30
  17   0  -9  171.48   29.00
 -17   0   9  139.59   32.40
  16   0  -9    5.00   18.90
  16   0  -9   25.20   16.70
 -16   0   9   48.20   19.00
  16   0  -9   14.50   24.10
 -16   0   9   13.80   14.30
 -15   0   9   19.60   28.40
  15   0  -9   20.60   23.00
  15   0  -9    9.40   15.70
 -15   0   9    9.00   13.40
  15   0  -9   33.40   18.90
 -14   0   9   94.29   16.00
  14   0  -9  107.49   18.10
  14   0  -9   80.99   19.50
 -14   0   9   68.19   19.10
  14   0  -9   73.99   14.20
 -14   0   9   62.59   13.80
 -13   0   9   15.20   11.80
  13   0  -9    5.90   17.40
  13   0  -9   20.10   11.90
  13   0  -9    2.70   13.10
 -13   0   9   -1.00   16.10
 -12   0   9  152.18   21.60
  12   0  -9  125.89   19.20
 -12   0   9   97.99   19.50
  12   0  -9  142.99   17.90
 -11   0   9  122.69   12.90
  11   0  -9  136.39   13.60
 -11   0   9  106.29   18.30
  11   0  -9  106.59   18.00
 -11   0   9  107.69   14.40
  10   0  -9   -0.60    9.00
 -10   0   9   -7.90    8.30
 -10   0   9   -3.40    8.80
  10   0  -9    4.20   13.00
  10   0  -9  -20.40    7.70
 -10   0   9    5.50   13.70
   9   0  -9  268.97   17.50
  -9   0   9  216.78   16.60
   9   0  -9  275.57   23.50
  -9   0   9  251.87   17.10
   9   0  -9  244.48   16.40
  -8   0   9  524.95   29.90
   8   0  -9  562.94   30.00
   8   0  -9  591.44   35.10
  -8   0   9  591.94   30.30
   8   0  -9  595.84   30.40
  -7   0   9 2736.33  126.39
   7   0  -9 2547.55  126.29
   7   0  -9 2554.14  126.29
   7   0  -9 2672.03  129.09
   6   0  -9  187.18   18.40
   6   0  -9  179.78   13.10
   6   0  -9  188.18   13.40
  -6   0   9  194.58   13.90
   5   0  -9   28.00   11.00
   5   0  -9   26.40    7.00
   5   0  -9   15.20    6.20
  -4   0   9  401.66   23.10
   4   0  -9  370.36   22.80
   4   0  -9  483.65   23.30
  -4   0   9  424.56   22.80
  -3   0   9 1520.35   73.79
   3   0  -9 1494.65   73.79
   3   0  -9 1524.75   73.89
  -3   0   9 1514.15   73.99
  -2   0   9 1048.70   53.39
   2   0  -9 1109.79   53.29
   2   0  -9 1040.90   53.09
  -2   0   9 1071.69   52.99
  -1   0   9  323.07   20.20
  -1   0   9  294.17   19.20
   1   0  -9  332.97   19.70
   1   0  -9  286.27   19.10
   0   0   9  122.99   14.80
   0   0  -9  121.89   14.00
   0   0  -9  127.29   13.40
   0   0   9  127.79   13.50
  -1   0  -9  721.13   38.70
  -1   0  -9  778.52   39.20
   1   0   9  748.13   39.20
   1   0   9  697.43   38.80
  -2   0  -9  812.92   42.10
  -2   0  -9  770.32   41.50
   2   0   9  769.92   41.60
   2   0   9  788.62   42.10
   3   0   9   18.50    9.90
  -3   0  -9   21.90   10.90
   3   0   9   13.80   10.80
  -3   0  -9   12.10    9.40
   4   0   9   72.59   12.80
  -4   0  -9   81.99   13.60
  -4   0  -9   85.09   12.90
   4   0   9   64.49   13.50
  -5   0  -9  113.69   15.30
   5   0   9   97.29   14.50
   5   0   9  136.89   16.60
  -5   0  -9  127.49   14.90
   6   0   9   13.80   13.80
  -6   0  -9   18.70   16.60
   6   0   9    0.60   13.10
  -6   0  -9   -7.20   12.90
  -6   0  -9   14.70   12.10
  -7   0  -9   -3.10   14.00
   7   0   9  -11.40   13.60
  -7   0  -9    2.30   13.10
   7   0   9   -3.40   14.60
  -7   0  -9   15.70   13.10
  -8   0  -9   65.49   16.60
  -8   0  -9   54.69   16.70
   8   0   9   77.39   17.10
  -8   0  -9   67.19   15.30
   8   0   9   67.59   17.20
  -9   0  -9   87.59   18.10
  -9   0  -9   95.79   19.40
   9   0   9   91.89   19.00
  -9   0  -9   51.09   20.70
  10   0   9  152.58   26.10
 -10   0  -9  120.29   20.50
 -10   0  -9   95.79   20.90
 -10   0  -9  129.79   19.60
  10   0   9  114.79   20.70
  11   0   9  101.99   22.90
 -11   0  -9   97.49   20.80
 -11   0  -9   63.59   17.80
  11   0   9   88.39   19.30
 -11   0  -9   93.59   19.70
  16  -1  -9   40.50   19.90
  16  -1  -9   59.69   15.90
  16  -1  -9   90.89   14.60
  16   1  -9   43.70   16.60
  16   1  -9   15.70   25.20
 -16   1   9   46.70   11.50
 -16   1   9   83.49   20.90
  15  -1  -9   31.00   12.60
  15  -1  -9   25.30   17.70
 -15  -1   9   34.30   18.30
  15  -1  -9   18.60   12.40
 -15  -1   9   -1.70   11.80
 -15  -1   9   26.90   14.60
  15   1  -9   32.10   16.00
 -15   1   9   21.20   10.80
 -15   1   9    9.30   18.10
  15   1  -9   27.30   15.00
  15   1  -9   34.30   19.50
  14  -1  -9   52.69   11.10
 -14  -1   9   22.70   13.80
  14  -1  -9   95.99   13.00
  14  -1  -9   34.10   17.00
 -14   1   9   48.40   10.60
  14   1  -9   48.60   15.20
 -14   1   9   44.30   18.00
  14   1  -9   44.50   20.20
  13  -1  -9  245.38   25.40
 -13  -1   9  203.08   21.20
  13  -1  -9  242.58   18.30
 -13  -1   9  181.28   27.60
  13   1  -9  244.78   27.50
  13   1  -9  231.38   23.40
  13   1  -9  225.58   21.90
 -13   1   9  231.68   18.10
 -13   1   9  245.78   25.70
 -12  -1   9  395.16   30.90
 -12  -1   9  391.06   26.50
  12  -1  -9  385.56   31.20
  12   1  -9  428.36   27.20
  12   1  -9  376.06   32.00
 -11  -1   9  561.54   34.60
 -11  -1   9  577.54   33.10
 -11  -1   9  544.95   36.40
  11  -1  -9  546.75   36.10
  11   1  -9  555.44   37.80
  11   1  -9  566.54   32.70
 -10  -1   9   60.79   16.90
 -10  -1   9   70.49   11.90
 -10  -1   9   66.59   12.40
  10  -1  -9   70.49   14.50
  10   1  -9   59.79   11.60
  10   1  -9   66.79   16.60
  10   1  -9   39.70   12.40
  -9  -1   9    8.60    9.50
  -9  -1   9   20.40   13.10
   9  -1  -9   23.50   12.70
  -9  -1   9   15.60   10.00
   9   1  -9   12.50    8.80
   9   1  -9   25.30    9.50
   9   1  -9   17.20   13.90
   8  -1  -9   21.50   12.40
  -8  -1   9   26.80    9.40
  -8  -1   9   31.90    9.70
   8   1  -9   13.10    8.20
   8   1  -9   12.00   13.70
   8   1  -9   35.30    9.30
  -7  -1   9  101.39   13.40
   7  -1  -9  113.79   13.80
  -7  -1   9  112.49   14.00
   7   1  -9  104.69   12.40
   7   1  -9  106.69   13.10
   7   1  -9  128.29   18.40
  -6  -1   9  204.88   16.00
  -6  -1   9  209.08   16.30
   6  -1  -9  213.08   19.20
   6   1  -9  190.68   19.30
   6   1  -9  182.18   14.90
   6   1  -9  185.38   15.50
  -5  -1   9   87.79   10.30
   5  -1  -9   66.49    8.10
   5   1  -9   99.09   13.90
   5   1  -9   77.19    9.50
   4  -1  -9   44.30    5.90
  -4  -1   9   28.40    8.40
   4  -1  -9   25.40    6.30
  -4  -1   9   25.50    7.80
   4   1  -9   20.60    7.60
  -4   1   9   36.70    6.80
   4   1  -9   48.20    8.90
   4   1  -9   47.10   11.20
  -4   1   9   30.70    5.40
  -3  -1   9  500.15   27.10
   3  -1  -9  478.05   25.00
  -3  -1   9  493.95   26.50
   3  -1  -9  454.15   25.60
  -3   1   9  495.05   24.90
   3   1  -9  491.55   26.90
   3   1  -9  502.65   26.60
  -3   1   9  402.86   25.40
   2  -1  -9   95.19   11.10
  -2  -1   9  107.59   12.20
   2  -1  -9   92.09   12.00
   2   1  -9  115.29   10.80
  -2   1   9  138.99   15.70
   2   1  -9  106.79   17.20
  -2   1   9   93.29   10.60
   1  -1  -9  131.79   14.20
  -1  -1   9  173.48   15.60
   1  -1  -9  144.69   13.90
  -1  -1   9  180.98   14.40
  -1   1   9  165.68   14.90
   1   1  -9  161.98   15.20
  -1   1   9  132.09   13.20
   1   1  -9  166.78   14.40
   0  -1  -9  256.17   17.50
   0  -1   9  228.48   17.40
   0  -1  -9  209.18   17.50
   0  -1   9  250.07   18.20
   0   1   9  232.08   18.10
   0   1  -9  212.18   18.20
   0   1   9  223.08   16.90
   0   1  -9  245.88   17.30
   1  -1   9  268.07   19.50
   1  -1   9  277.47   20.40
  -1  -1  -9  253.57   19.40
  -1  -1  -9  306.17   20.20
   1   1   9  265.37   19.20
  -1   1  -9  264.97   19.20
  -1   1  -9  287.07   20.20
   1   1   9  258.17   20.30
   2  -1   9  174.98   18.20
   2  -1   9  177.18   17.20
  -2  -1  -9  176.08   17.50
  -2  -1  -9  185.88   18.20
   2   1   9  191.58   18.50
   2   1   9  193.88   17.10
  -2   1  -9  190.08   16.50
  -2   1  -9  184.48   18.00
  -3  -1  -9   61.49   12.90
  -3  -1  -9   56.19   11.60
   3  -1   9   75.69   12.20
   3  -1   9   47.80   11.00
  -3   1  -9   65.69   12.00
   3   1   9   66.99   12.70
   3   1   9   58.49   11.80
  -3   1  -9   78.29   11.40
  -4  -1  -9  138.89   16.80
   4  -1   9  114.49   15.00
  -4  -1  -9  134.39   14.60
   4  -1   9  157.88   17.70
  -4   1  -9  166.88   18.80
   4   1   9  116.59   14.70
  -4   1  -9  143.49   17.30
   4   1   9  154.18   16.10
   5  -1   9  177.88   21.00
  -5  -1  -9  103.29   27.50
  -5  -1  -9  196.18   20.30
   5  -1   9  181.88   19.80
  -5  -1  -9  205.48   22.00
  -5   1  -9  201.68   21.20
   5   1   9  206.68   20.20
   5   1   9  163.28   21.70
  -5   1  -9  203.08   19.70
  -6  -1  -9  101.39   15.20
  -6  -1  -9  109.69   17.30
  -6  -1  -9  115.39   18.00
   6  -1   9  103.29   15.00
   6  -1   9  100.49   16.00
  -6   1  -9  100.39   14.70
   6   1   9   98.29   15.70
  -6   1  -9  100.59   15.20
   6   1   9  102.49   16.20
  -7  -1  -9   57.79   16.40
   7  -1   9   60.79   16.60
  -7  -1  -9   29.20   17.80
   7  -1   9   55.29   14.60
  -7  -1  -9   33.60   16.30
  -7   1  -9   70.49   16.00
  -7   1  -9   70.09   15.40
   7   1   9   22.50   15.20
  -7   1  -9   48.80   14.60
   8  -1   9   82.99   17.60
  -8  -1  -9   94.59   21.20
  -8  -1  -9   80.99   16.30
  -8  -1  -9   93.59   18.40
   8  -1   9   82.09   16.20
   8   1   9   46.00   28.10
  -8   1  -9   99.49   17.00
   8   1   9   65.89   16.20
  -8   1  -9   99.19   16.90
  -8   1  -9   77.29   16.10
   9  -1   9   33.20   15.60
   9  -1   9   27.80   17.00
  -9  -1  -9    2.30   14.60
  -9  -1  -9   13.20   16.60
  -9  -1  -9   22.90   17.20
  -9   1  -9   34.70   16.00
  -9   1  -9   20.20   15.00
   9   1   9   13.50   16.70
   9   1   9   26.00   17.10
  -9   1  -9   29.40   14.80
  10  -1   9   39.10   17.10
 -10  -1  -9   43.90   16.00
  10  -1   9   40.20   19.80
 -10  -1  -9   48.60   19.00
 -10  -1  -9   66.89   20.60
 -10   1  -9   25.40   16.00
  10   1   9   51.79   19.30
  10   1   9   38.10   18.30
 -10   1  -9   62.69   17.30
 -11  -1  -9   19.00   18.10
  11  -1   9   12.20   19.00
 -11  -1  -9    7.60   15.80
 -11  -1  -9    3.90   17.50
  11  -1   9   53.99   20.90
 -11   1  -9   24.10   17.80
  11   1   9   52.29   19.30
 -11   1  -9    9.10   18.60
 -11   1  -9   12.90   22.60
  11   1   9    5.60   17.70
 -16  -2   9   13.60   16.30
 -16  -2   9   41.90   16.30
  16  -2  -9   22.60   18.60
 -16  -2   9   57.39   20.10
  16   2  -9    9.60   29.20
  16   2  -9   43.80   18.00
  16   2  -9    8.60   17.50
  15  -2  -9   50.19   10.90
 -15  -2   9   68.29   29.10
 -15  -2   9   36.70   14.00
  15  -2  -9   36.70   18.10
  15   2  -9   -8.10   16.20
 -14  -2   9   65.79   16.10
 -14  -2   9   56.99   17.70
  14  -2  -9   88.49   18.40
  14   2  -9   66.99   17.10
  14   2  -9   75.89   21.70
  14   2  -9   91.09   17.30
 -13  -2   9   78.09   16.40
 -13  -2   9  153.48   38.30
  13  -2  -9  100.99   21.30
  13   2  -9  100.69   20.50
  13   2  -9   75.29   16.90
 -12  -2   9  228.88   22.50
 -12  -2   9  307.37   28.10
 -12  -2   9  256.57   24.10
  12  -2  -9  202.88   23.50
  12   2  -9  232.28   22.70
  12   2  -9  260.47   34.70
 -11  -2   9  174.58   19.30
 -11  -2   9  158.48   18.00
 -11  -2   9  164.28   23.10
  11  -2  -9  149.39   20.50
  11   2  -9  134.39   17.00
  11   2  -9  160.98   19.60
  11   2  -9  124.29   19.60
 -10  -2   9  600.54   40.00
  10  -2  -9  691.23   38.80
 -10  -2   9  678.33   37.70
 -10  -2   9  701.93   39.40
  10   2  -9  654.33   37.50
  10   2  -9  594.94   37.90
  10   2  -9  656.53   42.00
  -9  -2   9  156.28   18.60
  -9  -2   9   99.99   28.30
   9  -2  -9  175.28   19.30
   9   2  -9  172.18   24.00
   9   2  -9  161.68   18.00
   9   2  -9  176.18   20.80
  -8  -2   9  203.38   18.70
  -8  -2   9  173.38   18.30
  -8  -2   9  185.38   21.00
   8  -2  -9  186.08   19.10
   8   2  -9  183.18   22.20
   8   2  -9  174.88   17.40
   8   2  -9  201.08   18.10
   7  -2  -9  113.29   16.10
  -7  -2   9  122.79   15.90
  -7  -2   9  115.49   13.50
   7   2  -9  105.29   15.60
   7   2  -9  109.69   13.00
   7   2  -9  108.09   12.90
   6  -2  -9  375.96   24.90
  -6  -2   9  398.96   25.10
  -6  -2   9  433.66   24.50
   6   2  -9  351.66   24.50
   6   2  -9  398.56   27.10
   6   2  -9  345.97   23.80
  -5  -2   9  299.97   20.90
  -5  -2   9  312.47   21.40
   5   2  -9  267.37   20.10
   5   2  -9  297.87   23.30
   5   2  -9  293.07   20.70
  -4  -2   9   61.49   10.50
   4  -2  -9   56.09    7.20
   4   2  -9   41.90    9.60
   4   2  -9   68.39   13.20
   3  -2  -9  118.19   10.30
  -3  -2   9  134.89   13.00
   3  -2  -9  122.29   11.00
  -3  -2   9  130.39   14.50
   3   2  -9  127.19   16.60
  -3   2   9  132.49   10.50
  -3   2   9  122.99   11.00
   3   2  -9  117.09   14.30
   3   2  -9  138.99   16.10
   2  -2  -9  418.46   21.80
   2  -2  -9  317.57   21.80
  -2  -2   9  386.26   23.90
  -2  -2   9  360.06   23.60
   2   2  -9  389.16   23.30
  -2   2   9  384.66   21.20
   2   2  -9  368.46   24.30
   2   2  -9  412.46   25.20
  -2   2   9  325.57   21.20
   1  -2  -9  147.89   15.30
   1  -2  -9  185.58   15.20
  -1  -2   9  196.58   17.10
  -1  -2   9  191.98   16.30
  -1   2   9  174.58   16.90
  -1   2   9  161.08   14.20
   1   2  -9  182.18   16.10
   1   2  -9  173.18   17.30
   0  -2  -9  124.29   15.60
   0  -2  -9  153.88   15.80
   0  -2   9  168.68   15.80
   0  -2   9  143.39   16.50
   0   2  -9  178.18   16.10
   0   2   9  148.09   14.40
   0   2   9  154.18   16.00
   0   2  -9  152.88   17.20
   1  -2   9   87.29   12.40
   1  -2   9   94.99   12.90
  -1  -2  -9  104.39   12.20
  -1  -2  -9  126.69   16.10
  -1   2  -9  121.89   12.90
   1   2   9  110.29   13.10
   1   2   9  101.09   12.00
  -1   2  -9  125.49   14.10
  -2  -2  -9   44.60   11.00
  -2  -2  -9   63.29   20.60
   2  -2   9   55.79   11.40
   2  -2   9   49.40   12.00
   2   2   9   42.10   11.20
   2   2   9   51.69   19.20
  -2   2  -9   58.99   12.50
  -2   2  -9   50.59   10.90
  -3  -2  -9   93.39   13.00
  -3  -2  -9  105.69   15.60
   3  -2   9   90.59   13.00
   3  -2   9   71.69   13.70
   3   2   9  102.79   14.00
   3   2   9   99.19   14.20
  -3   2  -9   90.19   13.90
  -3   2  -9  107.59   13.20
  -4  -2  -9  220.08   29.40
  -4  -2  -9  264.97   23.00
   4  -2   9  261.37   23.30
   4  -2   9  251.77   22.30
  -4  -2  -9  301.97   24.70
   4   2   9  236.98   21.80
   4   2   9  240.68   23.30
  -4   2  -9  280.97   21.80
  -4   2  -9  289.57   23.50
   5  -2   9  272.57   24.70
   5  -2   9  272.87   23.30
  -5  -2  -9  271.17   25.60
  -5  -2  -9  291.67   26.30
  -5  -2  -9  267.07   27.00
  -5   2  -9  305.57   26.30
   5   2   9  231.68   27.60
  -5   2  -9  268.97   22.30
   5   2   9  257.87   24.90
  -6  -2  -9  125.59   18.60
   6  -2   9  133.49   17.00
  -6  -2  -9  104.79   16.60
   6  -2   9  111.09   17.30
  -6  -2  -9  145.79   17.10
   6   2   9  142.79   18.10
  -6   2  -9  130.79   16.60
  -6   2  -9  122.39   17.50
   6   2   9  119.59   17.50
  -7  -2  -9  129.89   19.60
  -7  -2  -9  159.68   20.80
   7  -2   9  133.49   18.40
   7  -2   9  185.48   21.70
  -7  -2  -9   91.59   16.50
  -7   2  -9  120.79   17.10
   7   2   9  137.89   18.50
  -7   2  -9   99.79   16.90
  -7   2  -9  168.98   24.30
   7   2   9  161.48   19.70
  -8  -2  -9   33.70   14.50
   8  -2   9   23.90   15.70
   8  -2   9   26.90   14.90
  -8  -2  -9   42.90   19.10
  -8   2  -9   31.70   15.20
  -8   2  -9   30.40   15.70
   8   2   9   25.30   20.20
  -8   2  -9   35.20   14.60
   8   2   9   23.90   16.80
   9  -2   9  108.99   18.20
  -9  -2  -9   94.09   22.20
  -9  -2  -9   86.89   19.60
  -9  -2  -9  110.59   18.00
   9  -2   9   99.49   19.80
   9   2   9   66.59   20.60
  -9   2  -9   89.69   18.00
   9   2   9   93.39   19.10
  -9   2  -9   56.79   16.90
  -9   2  -9  128.19   19.60
  10  -2   9   38.50   17.40
  10  -2   9   39.20   18.90
 -10  -2  -9   -5.60   17.90
 -10  -2  -9   32.80   20.30
 -10   2  -9   69.99   17.90
  10   2   9   30.10   20.40
 -10   2  -9   18.90   23.80
 -10   2  -9   29.40   16.70
  10   2   9   63.39   18.70
  15  -3  -9   45.40   17.70
 -15  -3   9   79.09   19.00
 -15  -3   9   43.70   19.80
 -15  -3   9   96.49   25.30
  15   3  -9   35.60   19.80
  15   3  -9   65.09   21.00
  14  -3  -9   97.49   18.90
 -14  -3   9   87.49   20.40
  14   3  -9   85.99   19.70
  14   3  -9   60.69   31.80
 -13  -3   9   47.60   20.00
 -13  -3   9   35.90   21.90
 -13  -3   9   24.70   16.10
  13  -3  -9   44.80   14.50
  13   3  -9   -5.80   16.20
  13   3  -9    9.40   16.50
  13   3  -9   -7.40   19.20
 -12  -3   9   11.40   18.20
  12  -3  -9   51.19   14.10
 -12  -3   9   64.59   16.50
 -12  -3   9   27.90   17.10
  12   3  -9   16.00   18.90
  12   3  -9   32.10   15.80
  11  -3  -9   16.90   12.30
 -11  -3   9   -5.60   16.10
 -11  -3   9  -16.80   15.00
 -11  -3   9   -0.30   14.50
  11   3  -9    0.80   18.40
  11   3  -9   -4.10   14.70
  11   3  -9    1.80   13.80
  10  -3  -9   20.50   11.60
 -10  -3   9    4.80   15.60
 -10  -3   9   22.20   13.90
 -10  -3   9   10.50   14.60
  10   3  -9   -3.30   16.80
  10   3  -9    5.60   13.50
  10   3  -9   -2.80   12.60
   9  -3  -9  200.78   18.70
  -9  -3   9  176.88   21.30
  -9  -3   9  166.18   23.00
  -9  -3   9  164.28   18.80
   9   3  -9  136.19   18.60
   9   3  -9  182.88   20.60
   9   3  -9  153.78   20.50
  -8  -3   9  386.96   27.40
  -8  -3   9  346.07   26.90
  -8  -3   9  380.86   30.00
   8  -3  -9  383.06   24.50
   8   3  -9  335.67   25.80
   8   3  -9  261.57   40.00
   7  -3  -9  507.85   28.90
  -7  -3   9  499.95   35.80
  -7  -3   9  425.76   30.30
   7   3  -9  460.25   33.30
   7   3  -9  462.95   30.60
   7   3  -9  482.15   30.60
  -6  -3   9  453.45   29.90
  -6  -3   9  447.76   30.50
   6  -3  -9  454.35   28.30
   6   3  -9  485.35   31.60
   6   3  -9  500.75   30.00
   6   3  -9  476.75   30.00
  -5  -3   9  432.16   28.00
  -5  -3   9  394.06   27.10
   5   3  -9  415.36   27.80
   5   3  -9  405.76   27.10
   5   3  -9  432.26   29.30
  -4  -3   9  260.57   23.10
  -4  -3   9  313.87   22.80
   4   3  -9  311.97   23.30
   4   3  -9  356.06   25.10
   4   3  -9  286.97   22.20
   3  -3  -9  642.64   32.30
  -3  -3   9  645.44   35.30
   3  -3  -9  624.14   31.80
  -3   3   9  540.55   31.30
  -3   3   9  634.94   31.70
   3   3  -9  617.84   36.40
   3   3  -9  593.44   35.10
  -2  -3   9  283.37   21.60
   2  -3  -9  264.57   19.10
  -2  -3   9  316.17   21.80
   2  -3  -9  250.47   18.50
   2   3  -9  272.87   23.30
   2   3  -9  291.67   22.70
  -2   3   9  269.37   18.00
   2   3  -9  275.87   21.20
  -2   3   9  264.37   17.90
  -1  -3   9  152.98   17.40
  -1  -3   9  113.09   13.70
   1  -3  -9  106.49   13.00
   1  -3  -9   89.79   12.00
   1   3  -9  117.09   17.10
   1   3  -9  113.99   15.80
   1   3  -9  115.59   13.90
  -1   3   9  102.79   12.10
   0  -3  -9  295.47   23.80
   0  -3   9  387.56   24.60
   0  -3   9  356.46   24.60
   0  -3  -9  356.46   24.50
   0   3   9  315.77   22.50
   0   3   9  356.96   23.00
   0   3  -9  338.07   24.00
   0   3  -9  346.57   24.30
   0   3  -9  345.87   26.40
   1  -3   9  824.82   46.20
   1  -3   9  860.11   46.00
  -1  -3  -9  949.60   46.40
  -1   3  -9  788.32   46.00
   1   3   9  808.92   45.20
  -1   3  -9  841.42   46.90
   2  -3   9  189.98   20.30
  -2  -3  -9  153.48   16.10
   2  -3   9  166.28   18.70
  -2  -3  -9  166.18   24.80
  -2  -3  -9  145.29   20.60
   2   3   9  168.08   17.90
  -2   3  -9  178.28   18.90
  -2   3  -9  155.68   17.80
   2   3   9  139.89   15.90
  -3  -3  -9   41.90   12.70
  -3  -3  -9   55.89   15.60
   3  -3   9   58.59   13.30
  -3  -3  -9   61.99   20.70
   3   3   9   50.19   13.60
   3   3   9   54.89   13.40
  -3   3  -9   62.59   13.30
  -3   3  -9   69.99   23.10
  -4  -3  -9   86.69   15.00
  -4  -3  -9  124.79   18.40
  -4  -3  -9  126.49   19.20
   4  -3   9  107.49   14.70
   4  -3   9   94.69   15.70
  -4   3  -9   94.99   14.60
   4   3   9  104.19   16.10
  -4   3  -9   95.69   16.40
   4   3   9  106.49   16.80
  -5  -3  -9  113.29   16.70
   5  -3   9  126.49   17.80
  -5  -3  -9  141.19   19.60
   5  -3   9  120.39   16.10
  -5  -3  -9  105.69   17.60
  -5   3  -9  106.89   17.20
   5   3   9  111.59   18.50
   5   3   9  154.58   18.20
  -5   3  -9  116.49   16.30
  -6  -3  -9   24.10   14.00
   6  -3   9   24.30   14.80
   6  -3   9    5.40   13.10
  -6  -3  -9   22.70   19.60
  -6  -3  -9   17.10   15.80
  -6   3  -9   15.50   14.50
   6   3   9   10.10   15.70
  -6   3  -9   19.00   13.10
   6   3   9   32.00   15.50
  -7  -3  -9   21.50   18.10
  -7  -3  -9   16.00   19.90
  -7  -3  -9   13.70   17.60
   7  -3   9   14.60   13.80
  -7   3  -9   24.90   14.80
  -7   3  -9   16.10   15.10
   7   3   9    2.70   17.60
   7   3   9   36.30   16.80
  -7   3  -9   13.00   13.20
  -8  -3  -9    1.50   18.40
   8  -3   9  -15.00   14.60
  -8  -3  -9  -10.80   15.70
   8  -3   9   15.30   14.40
  -8  -3  -9    2.30   17.20
  -8   3  -9   -1.70   15.80
  -8   3  -9   26.40   15.70
   8   3   9   14.20   18.50
  -8   3  -9    2.90   22.10
   9  -3   9  -18.10   24.00
   9  -3   9   -5.30   15.20
  -9  -3  -9  -35.40   23.20
  -9  -3  -9   11.60   15.70
  -9  -3  -9  -12.30   20.20
  -9   3  -9   -4.50   14.80
  -9   3  -9  -13.50   23.10
   9   3   9  -15.40   16.70
  -9   3  -9  -21.90   14.20
   9   3   9    9.60   17.60
 -13  -4   9    3.10   19.30
 -13  -4   9   26.60   17.50
  13  -4  -9   30.20   13.10
 -13  -4   9    1.80   19.20
  13   4  -9   -3.70   20.40
  13   4  -9   26.10   19.70
 -12  -4   9    6.50   18.10
  12  -4  -9   29.30   12.10
 -12  -4   9   -5.00   19.80
  12   4  -9    3.10   17.90
  12   4  -9   13.10   17.00
  12   4  -9   -0.20   17.90
  11  -4  -9   51.39   11.80
 -11  -4   9   23.70   19.10
 -11  -4   9   15.20   16.20
  11   4  -9   22.10   20.30
  11   4  -9   33.40   17.50
  10  -4  -9   79.69   12.20
 -10  -4   9   74.09   21.10
 -10  -4   9   59.39   24.60
 -10  -4   9   75.39   17.20
  10   4  -9   58.79   18.80
  10   4  -9   74.59   17.40
  10   4  -9   78.89   19.30
  -9  -4   9  161.48   20.40
  -9  -4   9  150.58   20.30
  -9  -4   9  188.28   23.30
   9  -4  -9  171.48   16.80
   9   4  -9  180.98   22.90
   9   4  -9  173.18   22.10
   9   4  -9  181.18   25.70
  -8  -4   9   52.19   16.20
   8  -4  -9   53.09   11.20
  -8  -4   9   52.29   16.00
   8   4  -9   58.59   17.70
   8   4  -9   44.50   14.50
   8   4  -9   41.30   16.00
  -7  -4   9   40.00   15.10
  -7  -4   9   62.19   14.50
   7  -4  -9   54.89   10.80
   7   4  -9   52.09   14.60
   7   4  -9   64.09   17.00
   7   4  -9   66.09   15.20
  -6  -4   9  534.25   34.70
   6  -4  -9  522.55   30.10
  -6  -4   9  476.15   34.90
   6   4  -9  583.64   41.70
   6   4  -9  497.95   35.30
   6   4  -9  543.15   36.50
  -5  -4   9  132.99   17.00
  -5  -4   9  150.18   18.30
   5   4  -9  175.58   21.00
   5   4  -9  104.59   15.70
   5   4  -9  149.39   19.50
  -4  -4   9  162.68   18.50
   4  -4  -9  183.48   15.90
  -4  -4   9  181.28   20.10
   4   4  -9  205.38   21.90
   4   4  -9  184.38   22.50
  -3  -4   9  255.47   23.60
   3  -4  -9  238.08   18.80
   3   4  -9  279.27   24.30
  -3   4   9  245.98   18.80
   3   4  -9  262.77   22.80
   3   4  -9  268.47   24.00
   2  -4  -9  234.68   19.50
   2  -4  -9  272.87   18.30
  -2  -4   9  196.78   29.70
  -2   4   9  220.28   17.50
   2   4  -9  238.38   22.70
   2   4  -9  241.78   21.90
   1  -4  -9  300.67   22.60
  -1  -4   9  351.96   27.20
   1  -4  -9  327.57   21.80
   1   4  -9  259.77   23.60
  -1   4   9  274.17   20.60
   1   4  -9  317.87   24.10
   0  -4   9  433.96   27.70
   0  -4  -9  472.75   27.50
   0  -4  -9  385.46   26.10
   0  -4   9  386.96   27.90
   0  -4  -9  378.46   27.90
   0   4   9  334.57   25.20
   0   4  -9  367.06   28.00
   0   4  -9  408.16   27.00
   0   4   9  365.46   25.40
   0   4  -9  374.66   30.50
   1  -4   9  583.54   38.70
  -1  -4  -9  583.04   38.90
  -1  -4  -9  682.03   38.50
   1  -4   9  653.23   38.90
  -1  -4  -9  603.84   37.70
  -1   4  -9  691.43   39.00
  -1   4  -9  706.33   41.10
   1   4   9  660.53   37.40
  -1   4  -9  648.04   37.10
   1   4   9  661.43   37.90
   2  -4   9   20.90   14.30
  -2  -4  -9   44.60   22.50
   2  -4   9    6.30   12.30
  -2  -4  -9   11.90   12.80
  -2  -4  -9   19.80   14.80
   2   4   9   14.70   14.70
   2   4   9   15.20   14.00
  -2   4  -9   30.00   15.70
  -2   4  -9   12.10   12.60
  -2   4  -9   13.40   11.80
   3  -4   9   81.59   15.20
   3  -4   9   74.09   16.10
  -3  -4  -9   74.29   17.40
  -3  -4  -9   57.89   15.40
  -3  -4  -9  131.39   19.40
  -3   4  -9  115.89   14.30
   3   4   9  107.49   16.70
  -3   4  -9   96.29   16.20
  -3   4  -9  105.89   17.80
   3   4   9   79.49   14.60
   4  -4   9  269.57   25.50
  -4  -4  -9  233.28   30.40
  -4  -4  -9  302.77   27.50
  -4  -4  -9  273.67   27.60
   4  -4   9  317.47   28.10
   4   4   9  297.67   26.10
   4   4   9  243.68   26.20
  -4   4  -9  291.27   25.40
  -4   4  -9  293.17   27.40
  -5  -4  -9   32.80   20.80
   5  -4   9   33.90   15.60
  -5  -4  -9   26.10   14.90
   5  -4   9   37.00   13.90
  -5  -4  -9   51.09   19.40
  -5   4  -9   64.49   16.50
   5   4   9   28.50   15.20
  -5   4  -9   68.69   17.00
   5   4   9   48.60   16.60
  -6  -4  -9   29.20   16.30
   6  -4   9   26.30   14.00
  -6  -4  -9   22.80   15.70
   6  -4   9   21.70   16.30
  -6  -4  -9   20.90   17.50
   6   4   9   44.70   16.90
   6   4   9   14.20   14.90
  -6   4  -9   12.30   14.30
  -6   4  -9   21.30   16.00
  -6   4  -9   20.20   12.40
   7  -4   9   28.20   15.00
  -7  -4  -9   39.20   19.50
  -7  -4  -9   62.29   21.00
  -7  -4  -9   42.40   17.80
  -7   4  -9   29.70   12.80
  -7   4  -9   47.60   16.20
   7   4   9   50.39   18.10
   7   4   9   32.40   21.00
  -8  -4  -9   36.20   21.00
   8  -4   9   37.20   16.50
  -8  -4  -9   31.70   23.30
   8  -4   9   -3.00   16.00
  -8   4  -9   34.30   17.20
   8   4   9    0.10   18.30
   8   4   9   47.60   19.30
  -8   4  -9   42.20   14.10
  -8   4  -9   29.40   16.60
 -10  -5   9   36.20   16.10
 -10  -5   9   43.10   23.40
  10   5  -9   59.19   16.90
  10   5  -9   20.40   17.50
  10   5  -9   61.09   21.00
  -9  -5   9   53.89   19.00
   9  -5  -9   14.40   10.90
  -9  -5   9   44.90   17.60
   9   5  -9   49.99   20.10
   9   5  -9   17.00   17.50
  -8  -5   9  237.28   29.00
   8  -5  -9  181.28   19.60
   8   5  -9  243.08   28.00
[truncated: 145,884 more chars]
