# Supplementary material for: First and Second Dissociation Enthalpies in Bi-Component Crystals Consisting of Maleic Acid and L-Phenylalanine
Source: Molecules. 2021 Sep 21;26(18):5714. doi: 10.3390/molecules26185714 (PMC8469174; doi:10.3390/molecules26185714)
Supplement: Supplementary file 1 [file molecules-26-05714-s001.zip › MA-Phe2_293K_R1.cif]

 
data_shelx
 
_audit_creation_method            'SHELXL-2018/3'
_shelx_SHELXL_version_number      '2018/3'
_chemical_name_systematic         ?
_chemical_name_common             ?
_chemical_melting_point           ?
_chemical_formula_moiety          ?
_chemical_formula_sum
 'C22 H26 N2 O8' 
_chemical_formula_weight          446.45

loop_
 _atom_type_symbol
 _atom_type_description
 _atom_type_scat_dispersion_real
 _atom_type_scat_dispersion_imag
 _atom_type_scat_source
 'C'  'C'   0.0033   0.0016
 'International Tables Vol C Tables 4.2.6.8 and 6.1.1.4'
 'H'  'H'   0.0000   0.0000
 'International Tables Vol C Tables 4.2.6.8 and 6.1.1.4'
 'N'  'N'   0.0061   0.0033
 'International Tables Vol C Tables 4.2.6.8 and 6.1.1.4'
 'O'  'O'   0.0106   0.0060
 'International Tables Vol C Tables 4.2.6.8 and 6.1.1.4'
 
_space_group_crystal_system       monoclinic
_space_group_IT_number            4
_space_group_name_H-M_alt         'P 21'
_space_group_name_Hall            'P 2yb'
 
_shelx_space_group_comment
;
The symmetry employed for this shelxl refinement is uniquely defined
by the following loop, which should always be used as a source of
symmetry information in preference to the above space-group names.
They are only intended as comments.
;
 
loop_
 _space_group_symop_operation_xyz
 'x, y, z'
 '-x, y+1/2, -z'
 
_cell_length_a                    13.9549(17)
_cell_length_b                    5.4179(6)
_cell_length_c                    15.4056(16)
_cell_angle_alpha                 90
_cell_angle_beta                  108.795(3)
_cell_angle_gamma                 90
_cell_volume                      1102.7(2)
_cell_formula_units_Z             2
_cell_measurement_temperature     293(2)
_cell_measurement_reflns_used     9767
_cell_measurement_theta_min       2.79
_cell_measurement_theta_max       26.36
 
_exptl_crystal_description        'plate'
_exptl_crystal_colour             'colourless'
_exptl_crystal_density_meas       ?
_exptl_crystal_density_method     ?
_exptl_crystal_density_diffrn     1.345          
_exptl_crystal_F_000              472
_exptl_transmission_factor_min    ?
_exptl_transmission_factor_max    ?
_exptl_crystal_size_max           0.800
_exptl_crystal_size_mid           0.600
_exptl_crystal_size_min           0.200
_exptl_absorpt_coefficient_mu     0.103
_shelx_estimated_absorpt_T_min    0.922
_shelx_estimated_absorpt_T_max    0.980
_exptl_absorpt_correction_type    'multi-scan'
_exptl_absorpt_correction_T_min   0.6574
_exptl_absorpt_correction_T_max   0.7454
_exptl_absorpt_process_details    ?
_exptl_absorpt_special_details    ?
_diffrn_ambient_temperature       293(2)
_diffrn_radiation_wavelength      0.71073
_diffrn_radiation_type            MoK\a
_diffrn_source                    ?
_diffrn_measurement_device_type   'Bruker AXS-KAPPA APEX II'
_diffrn_measurement_method        '\f and \w scans'
_diffrn_detector_area_resol_mean  ?
_diffrn_reflns_number             48992
_diffrn_reflns_av_unetI/netI      0.0222
_diffrn_reflns_av_R_equivalents   0.0519
_diffrn_reflns_limit_h_min        -17
_diffrn_reflns_limit_h_max        17
_diffrn_reflns_limit_k_min        -6
_diffrn_reflns_limit_k_max        6
_diffrn_reflns_limit_l_min        -19
_diffrn_reflns_limit_l_max        19
_diffrn_reflns_theta_min          2.390
_diffrn_reflns_theta_max          26.447
_diffrn_reflns_theta_full         25.242
_diffrn_measured_fraction_theta_max   0.972
_diffrn_measured_fraction_theta_full  0.969
_diffrn_reflns_Laue_measured_fraction_max    0.972
_diffrn_reflns_Laue_measured_fraction_full   0.969
_diffrn_reflns_point_group_measured_fraction_max   0.975
_diffrn_reflns_point_group_measured_fraction_full  0.974
_reflns_number_total              4451
_reflns_number_gt                 4088
_reflns_threshold_expression      'I > 2\s(I)'
_reflns_Friedel_coverage          0.807
_reflns_Friedel_fraction_max      0.979
_reflns_Friedel_fraction_full     0.979
 
_reflns_special_details
;
 Reflections were merged by SHELXL according to the crystal
 class for the calculation of statistics and refinement.
 
 _reflns_Friedel_fraction is defined as the number of unique
 Friedel pairs measured divided by the number that would be
 possible theoretically, ignoring centric projections and
 systematic absences.
;
 
_computing_data_collection        'Bruker APEX3'
_computing_cell_refinement        'Bruker SAINT'
_computing_data_reduction         'Bruker SAINT'
_computing_structure_solution     'SHELXT 2014/5 (Sheldrick, 2014)'
_computing_structure_refinement 'SHELXL-2018/3 (Sheldrick, 2018)'
_computing_molecular_graphics     'Mercury'
_computing_publication_material   ?
_refine_special_details           ?
_refine_ls_structure_factor_coef  Fsqd
_refine_ls_matrix_type            full
_refine_ls_weighting_scheme       calc
_refine_ls_weighting_details
'w=1/[\s^2^(Fo^2^)+(0.0319P)^2^+0.3479P] where P=(Fo^2^+2Fc^2^)/3'
_atom_sites_solution_primary      ?
_atom_sites_solution_secondary    ?
_atom_sites_solution_hydrogens    mixed
_refine_ls_hydrogen_treatment     mixed
_refine_ls_extinction_method      none
_refine_ls_extinction_coef        .
_refine_ls_abs_structure_details
;
 Flack x determined using 1716 quotients [(I+)-(I-)]/[(I+)+(I-)]
 (Parsons, Flack and Wagner, Acta Cryst. B69 (2013) 249-259).
;
_refine_ls_abs_structure_Flack    0.4(2)
_chemical_absolute_configuration  'syn'
_refine_ls_number_reflns          4451
_refine_ls_number_parameters      321
_refine_ls_number_restraints      1
_refine_ls_R_factor_all           0.0439
_refine_ls_R_factor_gt            0.0368
_refine_ls_wR_factor_ref          0.0878
_refine_ls_wR_factor_gt           0.0844
_refine_ls_goodness_of_fit_ref    1.054
_refine_ls_restrained_S_all       1.054
_refine_ls_shift/su_max           0.001
_refine_ls_shift/su_mean          0.000
 
loop_
 _atom_site_label
 _atom_site_type_symbol
 _atom_site_fract_x
 _atom_site_fract_y
 _atom_site_fract_z
 _atom_site_U_iso_or_equiv
 _atom_site_adp_type
 _atom_site_occupancy
 _atom_site_site_symmetry_order  
 _atom_site_calc_flag
 _atom_site_refinement_flags_posn
 _atom_site_refinement_flags_adp
 _atom_site_refinement_flags_occupancy
 _atom_site_disorder_assembly
 _atom_site_disorder_group
O5 O 0.91689(14) 0.5683(3) 0.34466(12) 0.0381(4) Uani 1 1 d . . . . .
O8 O 0.90006(14) 0.4432(3) 0.60514(11) 0.0370(4) Uani 1 1 d . . . . .
O6 O 0.79836(16) 0.6986(3) 0.40252(13) 0.0422(5) Uani 1 1 d . . . . .
O7 O 0.79423(16) 0.3001(4) 0.47390(11) 0.0441(5) Uani 1 1 d . . . . .
O1 O 0.87629(16) 0.5465(4) -0.21741(12) 0.0483(5) Uani 1 1 d . . . . .
O3 O 0.90841(17) 0.7533(3) 0.05981(13) 0.0461(5) Uani 1 1 d . . . . .
O4 O 0.90166(16) 0.4616(4) 0.15582(12) 0.0492(5) Uani 1 1 d . . . . .
N1 N 0.91655(17) 0.9874(4) 0.25251(14) 0.0311(4) Uani 1 1 d . . . . .
N2 N 0.89824(18) 0.0305(5) 0.69797(14) 0.0355(5) Uani 1 1 d . . . . .
C13 C 0.85851(18) 0.7239(4) 0.35540(14) 0.0282(5) Uani 1 1 d . . . . .
C12 C 0.85070(18) 0.9799(4) 0.31190(15) 0.0304(5) Uani 1 1 d . . . . .
H12 H 0.877727 1.099375 0.361537 0.036 Uiso 1 1 calc R U . . .
C14 C 0.84647(19) 0.2809(4) 0.55818(15) 0.0300(5) Uani 1 1 d . . . . .
C3 C 0.8687(2) 0.3433(5) 0.00299(17) 0.0393(6) Uani 1 1 d . . . . .
H3 H 0.855490 0.186249 0.020696 0.047 Uiso 1 1 calc R U . . .
C15 C 0.83843(19) 0.0283(4) 0.59876(15) 0.0329(5) Uani 1 1 d . . . . .
H15 H 0.869684 -0.092297 0.568759 0.039 Uiso 1 1 calc R U . . .
C2 C 0.8610(2) 0.3632(5) -0.08513(18) 0.0398(6) Uani 1 1 d . . . . .
H2 H 0.843335 0.218184 -0.118815 0.048 Uiso 1 1 calc R U . . .
C10 C 0.68999(19) 0.8927(5) 0.17898(18) 0.0376(6) Uani 1 1 d . . . . .
C4 C 0.89468(18) 0.5280(5) 0.07742(16) 0.0340(5) Uani 1 1 d . . . . .
C11 C 0.74236(19) 1.0569(5) 0.25892(17) 0.0380(5) Uani 1 1 d . . . . .
H11A H 0.703202 1.058577 0.300752 0.046 Uiso 1 1 calc R U . . .
H11B H 0.743340 1.223990 0.236582 0.046 Uiso 1 1 calc R U . . .
C1 C 0.87599(19) 0.5795(5) -0.13802(16) 0.0360(5) Uani 1 1 d . . . . .
C16 C 0.7295(2) -0.0552(5) 0.58363(19) 0.0423(6) Uani 1 1 d . . . . .
H16A H 0.693934 -0.060581 0.518193 0.051 Uiso 1 1 calc R U . . .
H16B H 0.730963 -0.221918 0.607022 0.051 Uiso 1 1 calc R U . . .
C5 C 0.6350(2) 0.6860(5) 0.1897(2) 0.0486(7) Uani 1 1 d . . . . .
H5 H 0.628520 0.651353 0.246647 0.058 Uiso 1 1 calc R U . . .
C17 C 0.67027(19) 0.1052(5) 0.62804(19) 0.0425(6) Uani 1 1 d . . . . .
C18 C 0.6182(2) 0.3109(6) 0.5835(3) 0.0579(8) Uani 1 1 d . . . . .
H18 H 0.619517 0.351580 0.525231 0.069 Uiso 1 1 calc R U . . .
C9 C 0.6960(2) 0.9389(6) 0.09258(19) 0.0489(7) Uani 1 1 d . . . . .
H9 H 0.729885 1.078824 0.083071 0.059 Uiso 1 1 calc R U . . .
C22 C 0.6665(2) 0.0519(7) 0.7144(2) 0.0584(8) Uani 1 1 d . . . . .
H22 H 0.700976 -0.085274 0.745448 0.070 Uiso 1 1 calc R U . . .
C8 C 0.6522(3) 0.7797(8) 0.0196(2) 0.0663(10) Uani 1 1 d . . . . .
H8 H 0.659361 0.809841 -0.037466 0.080 Uiso 1 1 calc R U . . .
C7 C 0.5986(3) 0.5787(7) 0.0320(3) 0.0669(10) Uani 1 1 d . . . . .
H7 H 0.568033 0.474041 -0.016892 0.080 Uiso 1 1 calc R U . . .
C6 C 0.5901(2) 0.5323(7) 0.1158(3) 0.0663(10) Uani 1 1 d . . . . .
H6 H 0.553643 0.395372 0.123774 0.080 Uiso 1 1 calc R U . . .
C19 C 0.5637(3) 0.4572(8) 0.6256(4) 0.0796(12) Uani 1 1 d . . . . .
H19 H 0.528891 0.594754 0.595212 0.096 Uiso 1 1 calc R U . . .
C20 C 0.5612(3) 0.4001(9) 0.7111(4) 0.0906(14) Uani 1 1 d . . . . .
H20 H 0.524726 0.498506 0.738773 0.109 Uiso 1 1 calc R U . . .
O2 O 0.8875(2) 0.7928(4) -0.10172(14) 0.0562(6) Uani 1 1 d . . . . .
C21 C 0.6122(3) 0.1990(10) 0.7558(3) 0.0834(13) Uani 1 1 d . . . . .
H21 H 0.610652 0.160029 0.814162 0.100 Uiso 1 1 calc R U . . .
H2NB H 0.962(3) 0.041(7) 0.706(2) 0.056(9) Uiso 1 1 d . . . . .
H2NA H 0.880(2) 0.164(6) 0.7256(18) 0.032(7) Uiso 1 1 d . . . . .
H1NB H 0.903(2) 0.850(6) 0.2109(19) 0.033(7) Uiso 1 1 d . . . . .
H1NC H 0.908(3) 1.133(7) 0.219(2) 0.058(10) Uiso 1 1 d . . . . .
H2NC H 0.891(2) -0.107(7) 0.726(2) 0.043(8) Uiso 1 1 d . . . . .
H2O H 0.897(2) 0.775(7) -0.023(2) 0.050(9) Uiso 1 1 d . . . . .
H1NA H 0.986(2) 0.974(6) 0.290(2) 0.044(8) Uiso 1 1 d . . . . .
H6O H 0.798(3) 0.512(9) 0.438(3) 0.086(12) Uiso 1 1 d . . . . .
 
loop_
 _atom_site_aniso_label
 _atom_site_aniso_U_11
 _atom_site_aniso_U_22
 _atom_site_aniso_U_33
 _atom_site_aniso_U_23
 _atom_site_aniso_U_13
 _atom_site_aniso_U_12
O5 0.0506(10) 0.0268(9) 0.0428(9) 0.0038(8) 0.0231(8) 0.0032(8)
O8 0.0483(10) 0.0257(9) 0.0325(8) 0.0027(7) 0.0065(8) -0.0023(8)
O6 0.0605(12) 0.0356(10) 0.0418(10) 0.0110(8) 0.0322(9) 0.0081(8)
O7 0.0678(12) 0.0358(10) 0.0248(8) 0.0029(7) 0.0095(8) -0.0130(9)
O1 0.0730(13) 0.0452(11) 0.0305(9) 0.0059(9) 0.0218(9) -0.0021(10)
O3 0.0705(13) 0.0290(10) 0.0423(10) -0.0081(8) 0.0230(9) -0.0055(9)
O4 0.0673(13) 0.0543(12) 0.0293(9) 0.0019(9) 0.0204(9) 0.0013(10)
N1 0.0397(11) 0.0266(11) 0.0276(9) 0.0047(9) 0.0118(8) -0.0030(9)
N2 0.0420(12) 0.0317(12) 0.0349(11) 0.0131(10) 0.0150(9) 0.0036(10)
C13 0.0401(12) 0.0230(11) 0.0213(10) -0.0009(8) 0.0097(9) -0.0009(9)
C12 0.0448(13) 0.0231(11) 0.0249(10) 0.0014(9) 0.0136(9) -0.0009(9)
C14 0.0433(13) 0.0240(11) 0.0264(11) 0.0007(9) 0.0166(10) -0.0002(10)
C3 0.0666(17) 0.0224(11) 0.0343(13) 0.0020(10) 0.0237(12) -0.0038(11)
C15 0.0476(13) 0.0247(11) 0.0295(11) 0.0008(10) 0.0169(10) -0.0014(10)
C2 0.0681(18) 0.0230(11) 0.0325(12) -0.0044(10) 0.0220(12) -0.0055(12)
C10 0.0308(12) 0.0327(13) 0.0459(14) 0.0053(11) 0.0077(10) 0.0094(10)
C4 0.0401(12) 0.0320(13) 0.0318(12) 0.0005(10) 0.0144(10) 0.0018(11)
C11 0.0445(13) 0.0269(11) 0.0446(13) 0.0057(11) 0.0172(11) 0.0064(11)
C1 0.0470(14) 0.0302(13) 0.0326(12) 0.0043(11) 0.0153(10) 0.0005(11)
C16 0.0548(16) 0.0280(12) 0.0429(14) 0.0013(11) 0.0139(12) -0.0123(12)
C5 0.0416(15) 0.0396(15) 0.0571(17) 0.0110(13) 0.0056(13) 0.0006(12)
C17 0.0348(13) 0.0387(15) 0.0507(15) 0.0050(12) 0.0091(11) -0.0094(11)
C18 0.0444(16) 0.0495(18) 0.076(2) 0.0142(16) 0.0135(15) -0.0053(14)
C9 0.0391(14) 0.0583(18) 0.0460(15) 0.0037(14) 0.0090(12) 0.0040(13)
C22 0.0508(16) 0.068(2) 0.0612(18) 0.0155(18) 0.0250(14) 0.0064(17)
C8 0.0523(18) 0.092(3) 0.0455(16) -0.0011(19) 0.0024(14) 0.0126(19)
C7 0.0560(19) 0.056(2) 0.068(2) -0.0115(18) -0.0086(16) 0.0066(17)
C6 0.0487(17) 0.0443(18) 0.085(2) 0.0045(18) -0.0080(16) -0.0049(15)
C19 0.0507(19) 0.056(2) 0.132(4) 0.016(2) 0.029(2) 0.0078(17)
C20 0.073(3) 0.084(3) 0.134(4) -0.009(3) 0.061(3) 0.005(2)
O2 0.1042(18) 0.0246(10) 0.0462(11) 0.0059(8) 0.0333(12) -0.0026(10)
C21 0.077(3) 0.101(3) 0.089(3) 0.006(3) 0.050(2) 0.006(3)
 
_geom_special_details
;
 All esds (except the esd in the dihedral angle between two l.s. planes)
 are estimated using the full covariance matrix.  The cell esds are taken
 into account individually in the estimation of esds in distances, angles
 and torsion angles; correlations between esds in cell parameters are only
 used when they are defined by crystal symmetry.  An approximate (isotropic)
 treatment of cell esds is used for estimating esds involving l.s. planes.
;
 
loop_
 _geom_bond_atom_site_label_1
 _geom_bond_atom_site_label_2
 _geom_bond_distance
 _geom_bond_site_symmetry_2
 _geom_bond_publ_flag
O5 C13 1.220(3) . ?
O8 C14 1.228(3) . ?
O6 C13 1.282(3) . ?
O6 H6O 1.15(5) . ?
O7 C14 1.272(3) . ?
O1 C1 1.237(3) . ?
O3 C4 1.278(3) . ?
O3 H2O 1.24(3) . ?
O4 C4 1.234(3) . ?
N1 C12 1.492(3) . ?
N1 H1NB 0.96(3) . ?
N1 H1NC 0.93(4) . ?
N1 H1NA 0.96(3) . ?
N2 C15 1.487(3) . ?
N2 H2NB 0.86(4) . ?
N2 H2NA 0.92(3) . ?
N2 H2NC 0.89(4) . ?
C13 C12 1.529(3) . ?
C12 C11 1.527(3) . ?
C12 H12 0.9800 . ?
C14 C15 1.524(3) . ?
C3 C2 1.331(3) . ?
C3 C4 1.476(3) . ?
C3 H3 0.9300 . ?
C15 C16 1.530(4) . ?
C15 H15 0.9800 . ?
C2 C1 1.480(3) . ?
C2 H2 0.9300 . ?
C10 C9 1.383(4) . ?
C10 C5 1.397(4) . ?
C10 C11 1.504(4) . ?
C11 H11A 0.9700 . ?
C11 H11B 0.9700 . ?
C1 O2 1.271(3) . ?
C16 C17 1.507(4) . ?
C16 H16A 0.9700 . ?
C16 H16B 0.9700 . ?
C5 C6 1.386(5) . ?
C5 H5 0.9300 . ?
C17 C22 1.378(4) . ?
C17 C18 1.386(4) . ?
C18 C19 1.394(6) . ?
C18 H18 0.9300 . ?
C9 C8 1.392(5) . ?
C9 H9 0.9300 . ?
C22 C21 1.389(6) . ?
C22 H22 0.9300 . ?
C8 C7 1.369(6) . ?
C8 H8 0.9300 . ?
C7 C6 1.357(5) . ?
C7 H7 0.9300 . ?
C6 H6 0.9300 . ?
C19 C20 1.364(7) . ?
C19 H19 0.9300 . ?
C20 C21 1.361(7) . ?
C20 H20 0.9300 . ?
O2 H2O 1.18(3) . ?
C21 H21 0.9300 . ?
 
loop_
 _geom_angle_atom_site_label_1
 _geom_angle_atom_site_label_2
 _geom_angle_atom_site_label_3
 _geom_angle
 _geom_angle_site_symmetry_1
 _geom_angle_site_symmetry_3
 _geom_angle_publ_flag
C13 O6 H6O 118(2) . . ?
C4 O3 H2O 109.4(17) . . ?
C12 N1 H1NB 111.4(16) . . ?
C12 N1 H1NC 111(2) . . ?
H1NB N1 H1NC 109(2) . . ?
C12 N1 H1NA 109.3(18) . . ?
H1NB N1 H1NA 106(2) . . ?
H1NC N1 H1NA 109(3) . . ?
C15 N2 H2NB 111(2) . . ?
C15 N2 H2NA 109.6(17) . . ?
H2NB N2 H2NA 108(3) . . ?
C15 N2 H2NC 113(2) . . ?
H2NB N2 H2NC 105(3) . . ?
H2NA N2 H2NC 110(2) . . ?
O5 C13 O6 126.2(2) . . ?
O5 C13 C12 121.6(2) . . ?
O6 C13 C12 112.2(2) . . ?
N1 C12 C11 111.36(19) . . ?
N1 C12 C13 108.83(19) . . ?
C11 C12 C13 113.6(2) . . ?
N1 C12 H12 107.6 . . ?
C11 C12 H12 107.6 . . ?
C13 C12 H12 107.6 . . ?
O8 C14 O7 125.7(2) . . ?
O8 C14 C15 120.9(2) . . ?
O7 C14 C15 113.5(2) . . ?
C2 C3 C4 131.0(2) . . ?
C2 C3 H3 114.5 . . ?
C4 C3 H3 114.5 . . ?
N2 C15 C14 108.85(19) . . ?
N2 C15 C16 111.1(2) . . ?
C14 C15 C16 113.8(2) . . ?
N2 C15 H15 107.6 . . ?
C14 C15 H15 107.6 . . ?
C16 C15 H15 107.6 . . ?
C3 C2 C1 130.2(2) . . ?
C3 C2 H2 114.9 . . ?
C1 C2 H2 114.9 . . ?
C9 C10 C5 117.7(3) . . ?
C9 C10 C11 121.1(2) . . ?
C5 C10 C11 121.2(3) . . ?
O4 C4 O3 121.1(2) . . ?
O4 C4 C3 119.0(2) . . ?
O3 C4 C3 119.9(2) . . ?
C10 C11 C12 114.3(2) . . ?
C10 C11 H11A 108.7 . . ?
C12 C11 H11A 108.7 . . ?
C10 C11 H11B 108.7 . . ?
C12 C11 H11B 108.7 . . ?
H11A C11 H11B 107.6 . . ?
O1 C1 O2 121.7(2) . . ?
O1 C1 C2 118.4(2) . . ?
O2 C1 C2 119.9(2) . . ?
C17 C16 C15 115.1(2) . . ?
C17 C16 H16A 108.5 . . ?
C15 C16 H16A 108.5 . . ?
C17 C16 H16B 108.5 . . ?
C15 C16 H16B 108.5 . . ?
H16A C16 H16B 107.5 . . ?
C6 C5 C10 120.3(3) . . ?
C6 C5 H5 119.8 . . ?
C10 C5 H5 119.8 . . ?
C22 C17 C18 118.0(3) . . ?
C22 C17 C16 121.0(3) . . ?
C18 C17 C16 121.1(3) . . ?
C17 C18 C19 120.3(3) . . ?
C17 C18 H18 119.9 . . ?
C19 C18 H18 119.9 . . ?
C10 C9 C8 121.2(3) . . ?
C10 C9 H9 119.4 . . ?
C8 C9 H9 119.4 . . ?
C17 C22 C21 121.3(4) . . ?
C17 C22 H22 119.3 . . ?
C21 C22 H22 119.3 . . ?
C7 C8 C9 119.8(3) . . ?
C7 C8 H8 120.1 . . ?
C9 C8 H8 120.1 . . ?
C6 C7 C8 120.0(3) . . ?
C6 C7 H7 120.0 . . ?
C8 C7 H7 120.0 . . ?
C7 C6 C5 121.0(3) . . ?
C7 C6 H6 119.5 . . ?
C5 C6 H6 119.5 . . ?
C20 C19 C18 120.5(4) . . ?
C20 C19 H19 119.7 . . ?
C18 C19 H19 119.7 . . ?
C21 C20 C19 119.9(4) . . ?
C21 C20 H20 120.1 . . ?
C19 C20 H20 120.1 . . ?
C1 O2 H2O 109.6(18) . . ?
C20 C21 C22 120.0(4) . . ?
C20 C21 H21 120.0 . . ?
C22 C21 H21 120.0 . . ?
 
loop_
 _geom_torsion_atom_site_label_1
 _geom_torsion_atom_site_label_2
 _geom_torsion_atom_site_label_3
 _geom_torsion_atom_site_label_4
 _geom_torsion
 _geom_torsion_site_symmetry_1
 _geom_torsion_site_symmetry_2
 _geom_torsion_site_symmetry_3
 _geom_torsion_site_symmetry_4
 _geom_torsion_publ_flag
O5 C13 C12 N1 4.8(3) . . . . ?
O6 C13 C12 N1 -175.5(2) . . . . ?
O5 C13 C12 C11 129.5(2) . . . . ?
O6 C13 C12 C11 -50.8(3) . . . . ?
O8 C14 C15 N2 3.2(3) . . . . ?
O7 C14 C15 N2 -177.4(2) . . . . ?
O8 C14 C15 C16 127.8(3) . . . . ?
O7 C14 C15 C16 -52.9(3) . . . . ?
C4 C3 C2 C1 0.0(6) . . . . ?
C2 C3 C4 O4 -176.6(3) . . . . ?
C2 C3 C4 O3 4.1(5) . . . . ?
C9 C10 C11 C12 -89.6(3) . . . . ?
C5 C10 C11 C12 89.3(3) . . . . ?
N1 C12 C11 C10 61.6(3) . . . . ?
C13 C12 C11 C10 -61.7(3) . . . . ?
C3 C2 C1 O1 171.5(3) . . . . ?
C3 C2 C1 O2 -8.9(5) . . . . ?
N2 C15 C16 C17 60.5(3) . . . . ?
C14 C15 C16 C17 -62.8(3) . . . . ?
C9 C10 C5 C6 1.1(4) . . . . ?
C11 C10 C5 C6 -177.8(3) . . . . ?
C15 C16 C17 C22 -93.1(3) . . . . ?
C15 C16 C17 C18 86.8(3) . . . . ?
C22 C17 C18 C19 -0.2(4) . . . . ?
C16 C17 C18 C19 180.0(3) . . . . ?
C5 C10 C9 C8 -2.5(4) . . . . ?
C11 C10 C9 C8 176.5(3) . . . . ?
C18 C17 C22 C21 0.1(5) . . . . ?
C16 C17 C22 C21 179.9(3) . . . . ?
C10 C9 C8 C7 2.7(5) . . . . ?
C9 C8 C7 C6 -1.4(5) . . . . ?
C8 C7 C6 C5 0.1(5) . . . . ?
C10 C5 C6 C7 0.1(5) . . . . ?
C17 C18 C19 C20 0.1(6) . . . . ?
C18 C19 C20 C21 0.0(7) . . . . ?
C19 C20 C21 C22 -0.1(7) . . . . ?
C17 C22 C21 C20 0.1(7) . . . . ?
 
_refine_diff_density_max    0.149
_refine_diff_density_min   -0.122
_refine_diff_density_rms    0.029

_shelx_res_file
;
TITL maleicacid_lPhe_1_2_a.res in P2(1)
    shelx.res
    created by SHELXL-2018/3 at 12:24:42 on 01-Sep-2021
CELL  0.71073  13.9549   5.4179  15.4056   90.000  108.795   90.000
ZERR     2.00   0.0017   0.0006   0.0016    0.000    0.003    0.000
LATT  -1
SYMM  - X, 1/2 + Y, - Z
SFAC  C    H    N    O
UNIT  44 52 4 16
MERG   2
OMIT     0.00 180.00
OMIT     0   0   4
OMIT    -8   0   8
FMAP   2
PLAN   20
SIZE     0.200   0.600   0.800
ACTA
BOND   $H
CONF
LIST   6
L.S.  10
TEMP     25.00
WGHT    0.031900    0.347900
FVAR       2.56801
O5    4    0.916887    0.568332    0.344656    11.00000    0.05059    0.02679 =
         0.04278    0.00379    0.02313    0.00318
O8    4    0.900058    0.443211    0.605142    11.00000    0.04829    0.02566 =
         0.03247    0.00272    0.00648   -0.00232
O6    4    0.798359    0.698641    0.402522    11.00000    0.06046    0.03559 =
         0.04177    0.01099    0.03215    0.00808
O7    4    0.794226    0.300050    0.473896    11.00000    0.06777    0.03579 =
         0.02484    0.00291    0.00947   -0.01298
O1    4    0.876287    0.546538   -0.217411    11.00000    0.07301    0.04516 =
         0.03049    0.00591    0.02177   -0.00215
O3    4    0.908415    0.753326    0.059810    11.00000    0.07047    0.02903 =
         0.04231   -0.00815    0.02303   -0.00549
O4    4    0.901664    0.461558    0.155825    11.00000    0.06733    0.05428 =
         0.02931    0.00195    0.02038    0.00134
N1    3    0.916551    0.987405    0.252513    11.00000    0.03973    0.02665 =
         0.02759    0.00473    0.01175   -0.00298
N2    3    0.898242    0.030498    0.697967    11.00000    0.04197    0.03165 =
         0.03489    0.01307    0.01501    0.00365
C13   1    0.858514    0.723901    0.355396    11.00000    0.04010    0.02296 =
         0.02128   -0.00086    0.00965   -0.00090
C12   1    0.850702    0.979857    0.311902    11.00000    0.04481    0.02310 =
         0.02491    0.00139    0.01362   -0.00090
AFIX  13
H12   2    0.877727    1.099375    0.361537    11.00000   -1.20000
AFIX   0
C14   1    0.846471    0.280921    0.558183    11.00000    0.04327    0.02404 =
         0.02643    0.00075    0.01660   -0.00022
C3    1    0.868703    0.343306    0.002987    11.00000    0.06664    0.02237 =
         0.03434    0.00204    0.02369   -0.00378
AFIX  43
H3    2    0.855490    0.186249    0.020696    11.00000   -1.20000
AFIX   0
C15   1    0.838426    0.028258    0.598759    11.00000    0.04764    0.02468 =
         0.02955    0.00083    0.01689   -0.00139
AFIX  13
H15   2    0.869684   -0.092297    0.568759    11.00000   -1.20000
AFIX   0
C2    1    0.860970    0.363200   -0.085128    11.00000    0.06810    0.02296 =
         0.03253   -0.00444    0.02204   -0.00548
AFIX  43
H2    2    0.843335    0.218184   -0.118815    11.00000   -1.20000
AFIX   0
C10   1    0.689986    0.892654    0.178976    11.00000    0.03081    0.03273 =
         0.04587    0.00534    0.00767    0.00944
C4    1    0.894677    0.528037    0.077416    11.00000    0.04011    0.03197 =
         0.03181    0.00050    0.01439    0.00176
C11   1    0.742364    1.056931    0.258924    11.00000    0.04445    0.02688 =
         0.04457    0.00574    0.01717    0.00638
AFIX  23
H11A  2    0.703202    1.058577    0.300752    11.00000   -1.20000
H11B  2    0.743340    1.223990    0.236582    11.00000   -1.20000
AFIX   0
C1    1    0.875986    0.579519   -0.138016    11.00000    0.04705    0.03016 =
         0.03264    0.00432    0.01529    0.00054
C16   1    0.729481   -0.055249    0.583628    11.00000    0.05482    0.02802 =
         0.04288    0.00129    0.01393   -0.01230
AFIX  23
H16A  2    0.693934   -0.060581    0.518193    11.00000   -1.20000
H16B  2    0.730963   -0.221918    0.607022    11.00000   -1.20000
AFIX   0
C5    1    0.635027    0.686014    0.189685    11.00000    0.04160    0.03956 =
         0.05714    0.01099    0.00562    0.00063
AFIX  43
H5    2    0.628520    0.651353    0.246647    11.00000   -1.20000
AFIX   0
C17   1    0.670269    0.105161    0.628038    11.00000    0.03477    0.03865 =
         0.05071    0.00502    0.00905   -0.00936
C18   1    0.618171    0.310914    0.583476    11.00000    0.04444    0.04945 =
         0.07558    0.01418    0.01351   -0.00532
AFIX  43
H18   2    0.619517    0.351580    0.525231    11.00000   -1.20000
AFIX   0
C9    1    0.695985    0.938860    0.092577    11.00000    0.03907    0.05825 =
         0.04596    0.00374    0.00904    0.00401
AFIX  43
H9    2    0.729885    1.078824    0.083071    11.00000   -1.20000
AFIX   0
C22   1    0.666484    0.051895    0.714351    11.00000    0.05077    0.06841 =
         0.06119    0.01547    0.02503    0.00638
AFIX  43
H22   2    0.700976   -0.085274    0.745448    11.00000   -1.20000
AFIX   0
C8    1    0.652216    0.779726    0.019564    11.00000    0.05228    0.09156 =
         0.04553   -0.00108    0.00244    0.01257
AFIX  43
H8    2    0.659361    0.809841   -0.037466    11.00000   -1.20000
AFIX   0
C7    1    0.598616    0.578733    0.032044    11.00000    0.05604    0.05623 =
         0.06787   -0.01150   -0.00860    0.00655
AFIX  43
H7    2    0.568033    0.474041   -0.016892    11.00000   -1.20000
AFIX   0
C6    1    0.590122    0.532307    0.115806    11.00000    0.04865    0.04429 =
         0.08472    0.00450   -0.00804   -0.00485
AFIX  43
H6    2    0.553643    0.395372    0.123774    11.00000   -1.20000
AFIX   0
C19   1    0.563750    0.457174    0.625625    11.00000    0.05070    0.05562 =
         0.13199    0.01559    0.02858    0.00783
AFIX  43
H19   2    0.528891    0.594754    0.595212    11.00000   -1.20000
AFIX   0
C20   1    0.561216    0.400127    0.711107    11.00000    0.07347    0.08372 =
         0.13439   -0.00888    0.06086    0.00472
AFIX  43
H20   2    0.524726    0.498506    0.738773    11.00000   -1.20000
AFIX   0
O2    4    0.887505    0.792831   -0.101716    11.00000    0.10423    0.02464 =
         0.04620    0.00586    0.03328   -0.00258
C21   1    0.612181    0.198993    0.755831    11.00000    0.07673    0.10129 =
         0.08925    0.00570    0.05042    0.00594
AFIX  43
H21   2    0.610652    0.160029    0.814162    11.00000   -1.20000
AFIX   0
H2NB  2    0.962177    0.040728    0.706229    11.00000    0.05551
H2NA  2    0.880055    0.164181    0.725556    11.00000    0.03194
H1NB  2    0.903385    0.849546    0.210864    11.00000    0.03335
H1NC  2    0.907781    1.132606    0.219160    11.00000    0.05826
H2NC  2    0.890666   -0.106694    0.726384    11.00000    0.04275
H2O   2    0.896618    0.775444   -0.023344    11.00000    0.05011
H1NA  2    0.986346    0.973604    0.290238    11.00000    0.04438
H6O   2    0.797676    0.512189    0.438064    11.00000    0.08630
HKLF    4


REM  maleicacid_lPhe_1_2_a.res in P2(1)
REM wR2 = 0.0878, GooF = S = 1.054, Restrained GooF = 1.054 for all data
REM R1 = 0.0368 for 4088 Fo > 4sig(Fo) and 0.0439 for all 4451 data
REM 321 parameters refined using 1 restraints

END

WGHT      0.0253      0.3535

REM Highest difference peak  0.149,  deepest hole -0.122,  1-sigma level  0.029
Q1    1   0.8627  0.6845  0.4543  11.00000  0.05    0.15
Q2    1   0.8286  0.1738  0.5871  11.00000  0.05    0.15
Q3    1   0.8443  0.8464  0.3226  11.00000  0.05    0.13
Q4    1   0.8476  0.4887 -0.1134  11.00000  0.05    0.12
Q5    1   0.8984  0.0570  0.7867  11.00000  0.05    0.11
Q6    1   0.9568  0.2062 -0.0831  11.00000  0.05    0.10
Q7    1   0.8649  0.4518  0.0333  11.00000  0.05    0.10
Q8    1   0.7950  0.1758 -0.0001  11.00000  0.05    0.10
Q9    1   0.7438  0.3630  0.3439  11.00000  0.05    0.10
Q10   1   0.8957  0.2006  0.0431  11.00000  0.05    0.10
Q11   1   0.6786  0.9636  0.1386  11.00000  0.05    0.10
Q12   1   0.5285  0.3897 -0.0032  11.00000  0.05    0.10
Q13   1   0.9398  1.0550  0.1543  11.00000  0.05    0.10
Q14   1   0.6400  0.2147  0.6146  11.00000  0.05    0.10
Q15   1   0.5544  0.4590  0.5532  11.00000  0.05    0.09
Q16   1   0.6581 -0.0161  0.6105  11.00000  0.05    0.09
Q17   1   0.8933  0.2184 -0.1085  11.00000  0.05    0.09
Q18   1   0.4976  0.7418  0.6498  11.00000  0.05    0.09
Q19   1   0.8981  0.6065  0.1852  11.00000  0.05    0.09
Q20   1   0.9399 -0.0942  0.5383  11.00000  0.05    0.09
;
_shelx_res_checksum   86220

_shelx_hkl_file
;
   0  -1   0   -5.30    9.60
   0  -1   0    2.40    7.70
   0  -1   0    8.90    8.10
   0  -1   0    6.30    8.00
   0  -1   0   -9.80   11.80
   0  -1   0   11.10    8.50
   0  -1   0    4.30    9.60
   0   1   0    7.30    8.80
   0   1   0    8.00    7.50
   0   1   0    5.50    8.80
   0   1   0    3.80   12.20
   0   1   0    5.50    8.50
   0   1   0    1.00    7.30
   0   1   0   -2.40    7.70
   0  -3   0    5.40   17.50
   0  -3   0   10.70    9.50
   0  -3   0    7.80   14.00
   0  -3   0   13.90   16.00
   0  -3   0   11.10   14.50
   0  -3   0    5.30   13.10
   0   3   0   11.80   13.60
   0   3   0    5.30   12.50
   0   3   0   10.60   15.10
   0   3   0   -3.40   15.50
   0   3   0   -7.70   19.40
   0   3   0   11.60   13.80
   0   3   0   -2.80   15.10
   0  -4   0 4731.23  155.38
   0  -4   0 5196.98  145.09
   0  -4   0 5268.57  141.49
   0  -4   0 5064.29  136.49
   0  -4   0 5097.19  146.69
   0   4   0 5252.07  142.39
   0   4   0 5326.87  144.49
   0   4   0 5049.99  156.68
   0   4   0 5312.47  144.29
   0   4   0 4629.74  144.09
   0   4   0 4818.72  140.79
   0   4   0 5254.37  146.39
   0  -5   0  -14.40   21.70
   0  -5   0  -13.60   10.90
   0  -5   0   18.70   19.60
   0  -5   0   29.70   20.40
   0   5   0    8.90   27.10
   0   5   0   20.70   19.50
   0   5   0  -16.80   21.90
   0   5   0    6.50   21.60
   0   5   0    6.10   18.40
   0   5   0   25.20   18.10
   0   5   0   16.80   22.60
   0  -6   0  123.69   25.70
   0  -6   0  103.39   22.70
   0  -6   0  154.18   29.10
   0  -6   0   86.19   44.10
   0  -6   0   92.19   26.70
   0   6   0  123.29   24.80
   0   6   0   91.79   22.00
   0   6   0   90.49   26.00
   0   6   0  111.39   27.60
   0   6   0   82.69   21.40
   0   6   0   66.89   31.00
   0   6   0  128.29   29.20
   1   6   0   -7.00   22.80
   1   6   0  -11.10   19.50
   1   6   0   21.40   24.80
   1   6   0   21.50   20.50
   1   6   0    6.50   23.90
   1   6   0   -3.90   27.80
   1   6   0   -6.50   22.80
  -1  -6   0   44.00   25.20
  -1  -6   0   -0.10   48.10
  -1  -6   0  -19.90   20.20
  -1  -6   0   34.00   26.20
  -1  -6   0   -5.60   22.10
   1   5   0  541.15   34.20
   1   5   0  644.14   44.90
   1   5   0  517.45   39.10
   1   5   0  561.44   39.40
   1   5   0  529.35   55.29
   1   5   0  568.84   42.10
   1   5   0  599.74   37.10
  -1  -5   0  532.25   39.40
  -1  -5   0  532.15   42.20
  -1  -5   0  540.55   44.10
  -1  -5   0  556.34   35.10
  -1  -5   0  499.05   40.40
   1   4   0 2770.22   87.59
   1   4   0 3148.98   87.39
   1   4   0 2763.92   83.39
   1   4   0 2758.12   82.79
   1   4   0 2752.02   85.59
   1   4   0 2774.62   98.89
   1   4   0 2727.73   86.89
  -1  -4   0 2749.62   87.69
  -1  -4   0 2746.83   88.29
  -1  -4   0 2738.33   75.69
  -1  -4   0 2794.02   84.89
  -1  -4   0 2846.32   83.29
   1   3   0 2921.41   85.99
   1   3   0 2864.51   86.49
   1   3   0 3029.60   96.39
   1   3   0 2921.91   83.29
   1   3   0 2916.71   86.29
   1   3   0 2800.92   85.79
   1   3   0 2965.10   83.69
  -1  -3   0 2915.41   78.59
  -1  -3   0 2991.10   83.59
  -1  -3   0 2808.42   87.09
  -1  -3   0 2967.30   83.99
  -1  -3   0 2813.22   97.09
   1   2   0 1441.16   46.40
   1   2   0 1490.35   53.59
   1   2   0 1466.25   46.50
   1   2   0 1413.26   43.50
   1   2   0 1404.96   46.00
   1   2   0 1469.65   55.39
   1   2   0 1476.35   43.90
  -1  -2   0 1494.55   54.29
  -1  -2   0 1425.06   46.20
  -1  -2   0 1350.56   43.40
  -1  -2   0 1412.36   44.20
   1   1   0 1042.00   33.80
   1   1   0 1028.50   30.80
   1   1   0 1045.90   31.60
   1   1   0 1106.09   32.70
   1   1   0 1078.19   37.70
  -1  -1   0 1086.69   31.50
  -1  -1   0 1023.90   37.30
  -1  -1   0 1024.00   33.90
  -1  -1   0 1069.39   32.60
  -1  -1   0 1070.29   31.80
  -1  -1   0 1009.70   32.30
   1  -1   0 1087.49   32.80
   1  -1   0 1014.60   30.60
   1  -1   0 1049.09   31.70
   1  -1   0 1174.18   32.00
   1  -1   0  976.50   29.80
   1  -1   0 1046.00   31.70
   1  -1   0 1098.89   33.90
  -1   1   0 1095.39   31.70
  -1   1   0 1000.90   31.80
  -1   1   0 1055.19   34.50
  -1   1   0 1011.80   32.10
  -1   1   0 1038.20   32.00
  -1   1   0 1049.59   29.70
  -1   1   0 1035.00   31.10
   1  -2   0 1502.05   43.10
   1  -2   0 1421.16   45.80
   1  -2   0 1459.25   46.00
   1  -2   0 1476.45   47.60
   1  -2   0 1433.06   43.60
   1  -2   0 1515.05   44.50
  -1   2   0 1442.06   44.30
  -1   2   0 1484.55   43.90
  -1   2   0 1437.96   43.00
  -1   2   0 1409.76   45.30
  -1   2   0 1395.26   54.49
  -1   2   0 1467.65   47.90
  -1   2   0 1400.16   45.70
   1  -3   0 2941.21   86.69
   1  -3   0 2926.41   83.29
   1  -3   0 2859.21   85.89
   1  -3   0 2983.10   88.39
   1  -3   0 3001.40   81.69
   1  -3   0 3020.30   84.09
  -1   3   0 3004.00   88.49
  -1   3   0 2772.22   85.49
  -1   3   0 2825.22   85.19
  -1   3   0 2956.10   96.79
  -1   3   0 2868.61   82.69
  -1   3   0 2893.11   84.09
  -1   3   0 2782.52   82.99
   1  -4   0 2692.93   82.09
   1  -4   0 2702.33   85.89
   1  -4   0 2782.22   86.19
   1  -4   0 2979.10   80.49
   1  -4   0 2843.62   89.09
  -1   4   0 2751.72   99.29
  -1   4   0 2706.23   85.09
  -1   4   0 2731.83   84.99
  -1   4   0 2810.22   88.49
  -1   4   0 2708.23   81.89
  -1   4   0 2831.02   82.49
   1  -5   0  517.75   38.30
   1  -5   0  518.85   43.40
   1  -5   0  512.05   39.70
   1  -5   0  503.05   33.90
  -1   5   0  497.35   34.30
  -1   5   0  579.24   44.40
  -1   5   0  533.65   35.50
  -1   5   0  504.15   41.40
  -1   5   0  550.54   38.40
  -1   5   0  535.85   57.79
  -1   5   0  523.55   35.90
   1  -6   0    1.30   22.50
   1  -6   0    8.90   24.50
   1  -6   0   23.60   25.20
   1  -6   0    2.50   20.20
  -1   6   0   16.90   26.60
  -1   6   0    9.60   19.80
  -1   6   0   14.40   24.00
  -1   6   0    2.20   20.20
  -1   6   0   19.80   19.50
  -1   6   0  -24.00   24.50
  -1   6   0    9.20   30.40
   2   6   0   -7.50   24.90
   2   6   0    4.80   19.80
   2   6   0   28.80   29.60
   2   6   0    3.40   20.50
   2   6   0   -0.90   22.40
   2   6   0   15.50   25.00
   2   6   0  -16.30   23.40
  -2  -6   0    5.40   22.60
  -2  -6   0  -14.20   26.30
  -2  -6   0   30.80   24.50
  -2  -6   0   26.30   22.00
  -2  -6   0   19.90   26.00
   2   5   0 1137.09   66.89
   2   5   0 1038.70   44.30
   2   5   0 1000.30   51.09
   2   5   0 1048.20   47.30
   2   5   0  982.40   50.49
   2   5   0 1022.60   50.99
   2   5   0 1096.99   59.79
  -2  -5   0 1043.70   45.50
  -2  -5   0 1128.19   49.20
  -2  -5   0 1016.60   60.69
  -2  -5   0 1056.39   50.29
  -2  -5   0  975.60   51.59
   2   4   0   83.19   20.60
   2   4   0   53.09   15.80
   2   4   0   49.10   20.40
   2   4   0   58.19   20.30
   2   4   0   47.20   16.30
   2   4   0   68.09   19.00
   2   4   0   68.19   23.20
  -2  -4   0   58.29   17.60
  -2  -4   0   59.79   27.80
  -2  -4   0   32.70   19.50
  -2  -4   0   23.40   21.10
  -2  -4   0   28.80   18.20
  -2  -4   0   35.90   18.10
   2   3   0 1214.08   54.19
   2   3   0 1184.28   46.10
   2   3   0 1226.38   41.00
   2   3   0 1230.38   44.20
   2   3   0 1164.78   45.40
   2   3   0 1258.47   41.70
   2   3   0 1159.38   44.70
  -2  -3   0 1149.19   44.90
  -2  -3   0 1170.48   34.00
  -2  -3   0 1132.59   42.90
  -2  -3   0 1143.39   45.10
  -2  -3   0 1203.78   40.00
  -2  -3   0 1110.19   56.29
  -2  -3   0 1170.38   45.50
   2   2   0 2120.69   61.49
   2   2   0 2246.18   62.09
   2   2   0 2134.69   65.39
   2   2   0 2167.48   70.49
   2   2   0 2285.87   64.79
  -2  -2   0 2042.30   64.39
  -2  -2   0 2143.59   58.09
  -2  -2   0 2134.49   64.19
  -2  -2   0 1992.50   61.29
  -2  -2   0 2052.19   61.79
  -2  -2   0 2239.48   71.69
  -2  -2   0 2054.69   63.39
   2  -2   0 2178.88   65.89
   2  -2   0 2116.69   63.39
   2  -2   0 2171.68   59.29
   2  -2   0 2170.78   61.99
   2  -2   0 2185.98   61.79
   2  -2   0 2106.79   63.89
   2  -2   0 2209.58   62.69
  -2   2   0 2150.08   63.39
  -2   2   0 2139.89   61.79
  -2   2   0 2049.29   62.09
  -2   2   0 2152.78   59.09
  -2   2   0 2100.59   62.69
  -2   2   0 2234.18   66.29
   2  -3   0 1141.49   40.00
   2  -3   0 1191.08   46.70
   2  -3   0 1114.89   43.00
   2  -3   0 1208.78   40.90
   2  -3   0 1178.28   43.80
   2  -3   0 1183.78   44.80
  -2   3   0 1175.78   41.20
  -2   3   0 1170.38   42.30
  -2   3   0 1142.59   43.80
  -2   3   0 1152.88   47.40
  -2   3   0 1158.28   40.40
  -2   3   0 1137.79   37.80
  -2   3   0 1207.38   56.79
   2  -4   0   61.49   16.90
   2  -4   0   69.39   14.90
   2  -4   0   31.80   19.70
   2  -4   0   55.59   20.10
   2  -4   0   72.79   23.40
  -2   4   0   46.50   17.30
  -2   4   0   50.69   26.90
  -2   4   0   42.10   18.90
  -2   4   0   42.70   16.60
  -2   4   0   49.70   19.00
  -2   4   0   48.60   22.50
  -2   4   0   47.00   19.50
   2  -5   0 1114.89   47.90
   2  -5   0 1107.79   50.69
   2  -5   0  997.50   44.20
   2  -5   0 1070.59   52.79
   2  -5   0 1028.30   53.69
   2  -5   0 1083.29   40.40
  -2   5   0  985.70   43.90
  -2   5   0 1014.40   53.99
  -2   5   0  949.71   41.20
  -2   5   0 1012.90   67.69
  -2   5   0 1047.70   46.80
  -2   5   0 1007.30   48.00
  -2   5   0 1082.49   51.29
   2  -6   0   -5.80   21.80
   2  -6   0  -11.80   19.30
   2  -6   0  -17.60   15.20
   2  -6   0   12.60   24.10
  -2   6   0  -27.60   24.00
  -2   6   0   24.10   26.30
  -2   6   0  -15.40   17.10
  -2   6   0    6.70   31.70
  -2   6   0   11.40   19.50
  -2   6   0   10.30   19.20
  -2   6   0  -17.80   23.30
   3   6   0   98.19   34.20
   3   6   0   87.89   24.00
   3   6   0   65.89   25.50
   3   6   0   80.09   26.60
   3   6   0   99.79   28.40
   3   6   0   78.99   22.00
   3   6   0  111.19   28.90
  -3  -6   0  101.19   27.50
  -3  -6   0  129.39   32.70
  -3  -6   0  113.29   27.10
  -3  -6   0  114.39   29.30
  -3  -6   0   84.79   24.20
   3   5   0 1153.48   65.59
   3   5   0 1281.17   56.29
   3   5   0 1275.37   58.29
   3   5   0 1350.16   50.89
   3   5   0 1250.57   58.19
   3   5   0 1400.56   71.89
   3   5   0 1259.57   51.59
  -3  -5   0 1287.47   56.69
  -3  -5   0 1277.47   51.59
  -3  -5   0 1226.18   57.99
  -3  -5   0 1362.66   53.99
  -3  -5   0 1266.27   69.69
   3   4   0 1492.65   67.39
   3   4   0 1468.85   57.59
   3   4   0 1508.25   57.99
   3   4   0 1482.45   52.19
   3   4   0 1449.95   55.69
   3   4   0 1476.25   50.79
   3   4   0 1489.65   54.39
  -3  -4   0 1376.36   56.19
  -3  -4   0 1406.46   55.79
  -3  -4   0 1401.46   51.09
  -3  -4   0 1435.56   52.69
  -3  -4   0 1446.86   70.79
  -3  -4   0 1382.86   55.19
   3   3   0 2323.77   74.49
   3   3   0 2570.14   83.09
   3   3   0 2360.66   74.79
   3   3   0 2370.76   75.19
   3   3   0 2335.57   69.99
   3   3   0 2278.57   73.59
   3   3   0 2410.96   72.19
  -3  -3   0 2461.45   85.69
  -3  -3   0 2265.47   73.29
  -3  -3   0 2293.47   72.59
  -3  -3   0 2370.86   64.19
  -3  -3   0 2372.36   70.19
  -3  -3   0 2247.78   73.39
  -3  -3   0 2327.57   83.99
   3   2   0  744.63   39.20
   3   2   0  623.14   32.40
   3   2   0  667.63   34.40
   3   2   0  657.43   28.70
   3   2   0  669.33   28.10
  -3  -2   0  622.04   29.50
  -3  -2   0  685.63   23.70
  -3  -2   0  622.74   32.00
  -3  -2   0  672.23   33.10
  -3  -2   0  597.44   40.10
  -3  -2   0  614.34   28.90
  -3  -2   0  656.83   27.90
   3  -2   0  654.03   27.50
   3  -2   0  680.33   30.70
   3  -2   0  708.73   30.60
   3  -2   0  641.34   28.20
   3  -2   0  673.93   22.30
   3  -2   0  700.63   30.20
   3  -2   0  677.03   33.00
  -3   2   0  711.83   29.40
  -3   2   0  659.13   36.40
  -3   2   0  670.33   28.10
  -3   2   0  687.03   28.60
  -3   2   0  690.13   34.70
  -3   2   0  710.43   29.10
   3  -3   0 2362.26   69.29
   3  -3   0 2349.96   71.59
   3  -3   0 2393.86   70.19
   3  -3   0 2482.15   75.49
   3  -3   0 2379.76   70.49
   3  -3   0 2374.16   71.99
  -3   3   0 2181.18   70.39
  -3   3   0 2250.17   70.59
  -3   3   0 2373.06   70.69
  -3   3   0 2400.26   69.69
  -3   3   0 2216.88   64.59
  -3   3   0 2385.76   75.49
   3  -4   0 1512.05   51.69
   3  -4   0 1401.16   55.19
   3  -4   0 1446.06   49.40
   3  -4   0 1323.27   53.49
   3  -4   0 1379.06   49.40
   3  -4   0 1499.55   58.09
  -3   4   0 1445.36   58.09
  -3   4   0 1385.36   51.99
  -3   4   0 1464.95   50.29
  -3   4   0 1371.66   44.20
  -3   4   0 1397.06   52.69
  -3   4   0 1498.75   53.49
  -3   4   0 1348.77   69.99
   3  -5   0 1260.17   47.90
   3  -5   0 1274.47   59.99
   3  -5   0 1259.17   55.59
   3  -5   0 1315.57   56.29
   3  -5   0 1250.87   50.19
   3  -5   0 1313.07   52.79
  -3   5   0 1306.17   51.99
  -3   5   0 1333.07   50.79
  -3   5   0 1299.27   53.39
  -3   5   0 1293.17   56.09
  -3   5   0 1266.87   74.09
  -3   5   0 1281.07   60.39
   3  -6   0   71.89   19.50
   3  -6   0   77.69   21.70
   3  -6   0   67.09   31.20
   3  -6   0   99.79   27.50
   3  -6   0   80.49   24.40
  -3   6   0   39.30   26.00
  -3   6   0   92.79   31.20
  -3   6   0  101.29   22.90
  -3   6   0  100.39   21.00
  -3   6   0  100.59   22.90
  -3   6   0   74.79   25.40
  -3   6   0  111.29   36.60
   4   6   0   33.60   21.50
   4   6   0  113.19   29.00
   4   6   0   47.50   28.10
   4   6   0   34.90   21.20
   4   6   0   56.99   32.60
   4   6   0   42.00   25.10
  -4  -6   0   59.99   24.30
  -4  -6   0   99.89   29.50
  -4  -6   0   79.99   27.10
  -4  -6   0   92.59   28.70
  -4  -6   0   79.29   26.20
   4   5   0  151.98   22.70
   4   5   0  103.49   27.40
   4   5   0  118.99   22.30
   4   5   0  151.88   27.40
   4   5   0  126.69   28.00
   4   5   0  182.78   30.90
  -4  -5   0  153.68   38.20
  -4  -5   0  200.98   27.20
  -4  -5   0  133.39   23.80
  -4  -5   0  135.59   27.50
  -4  -5   0  121.69   29.40
  -4  -5   0  144.89   28.20
   4   4   0 2142.79   68.09
   4   4   0 2119.59   73.39
   4   4   0 2061.39   83.19
   4   4   0 2184.68   68.69
   4   4   0 2177.58   73.69
   4   4   0 2122.79   75.39
  -4  -4   0 2118.89   87.89
  -4  -4   0 2111.79   68.59
  -4  -4   0 2083.19   71.99
  -4  -4   0 2191.68   72.89
  -4  -4   0 2087.09   69.69
  -4  -4   0 2156.48   73.29
   4   3   0 1179.78   53.89
   4   3   0 1160.48   44.70
   4   3   0 1180.28   41.80
   4   3   0 1192.08   42.40
   4   3   0 1197.98   48.50
  -4  -3   0 1175.88   46.60
  -4  -3   0 1145.79   56.69
  -4  -3   0 1207.58   46.10
  -4  -3   0 1105.69   43.40
  -4  -3   0 1168.58   35.70
  -4  -3   0 1198.28   42.00
  -4  -3   0 1113.29   43.70
   4   2   0  565.04   37.10
   4   2   0  461.65   32.50
   4   2   0  454.75   28.20
   4   2   0  477.65   24.10
   4   2   0  523.15   27.50
   4   2   0  501.55   34.50
   4   2   0  541.45   27.10
  -4  -2   0  521.25   32.00
  -4  -2   0  543.55   23.70
  -4  -2   0  521.05   27.70
  -4  -2   0  536.05   32.20
  -4  -2   0  544.35   27.60
  -4  -2   0  527.05   39.30
  -4  -2   0  495.25   25.00
   4  -2   0  566.24   28.80
   4  -2   0  509.75   30.30
   4  -2   0  548.45   28.00
   4  -2   0  541.95   29.10
   4  -2   0  503.45   19.50
   4  -2   0  473.15   24.20
   4  -2   0  572.84   32.40
  -4   2   0  496.85   30.50
  -4   2   0  555.04   34.20
  -4   2   0  586.64   28.10
  -4   2   0  544.55   28.40
  -4   2   0  590.74   27.50
  -4   2   0  506.25   27.00
  -4   2   0  469.15   33.20
   4  -3   0 1207.68   43.50
   4  -3   0 1156.68   47.10
   4  -3   0 1168.68   39.80
   4  -3   0 1156.18   43.90
   4  -3   0 1263.37   45.40
   4  -3   0 1167.98   42.10
  -4   3   0 1158.38   42.30
  -4   3   0 1165.08   42.20
  -4   3   0 1087.59   49.80
  -4   3   0 1147.89   41.40
  -4   3   0 1195.78   48.60
  -4   3   0 1155.78   42.50
   4  -4   0 2192.38   69.99
   4  -4   0 2196.28   72.99
   4  -4   0 2148.69   68.89
   4  -4   0 2268.07   68.59
   4  -4   0 2112.69   71.89
   4  -4   0 2204.78   75.89
  -4   4   0 2149.08   69.39
  -4   4   0 2145.29   68.69
  -4   4   0 2106.39   69.79
  -4   4   0 2080.09   70.99
  -4   4   0 2197.58   77.39
   4  -5   0  157.08   22.40
   4  -5   0  183.58   24.60
   4  -5   0  107.99   24.70
   4  -5   0  104.29   25.10
   4  -5   0  161.48   24.10
   4  -5   0  154.88   26.90
  -4   5   0  167.98   37.30
  -4   5   0  117.09   23.90
  -4   5   0  110.69   23.10
  -4   5   0  143.59   29.60
  -4   5   0  114.69   24.60
  -4   5   0  147.69   36.20
  -4   5   0  150.88   23.10
   4  -6   0   76.89   28.20
   4  -6   0   43.90   25.70
   4  -6   0   50.29   21.00
   4  -6   0   75.39   21.20
   4  -6   0   53.59   23.50
   4  -6   0   60.39   27.10
  -4   6   0   81.49   30.40
  -4   6   0   49.10   30.30
  -4   6   0   29.90   25.70
  -4   6   0   66.59   22.30
  -4   6   0   69.69   22.60
  -4   6   0   39.40   24.40
   5   6   0  210.78   41.30
   5   6   0  206.38   41.80
   5   6   0  209.48   29.50
   5   6   0  210.08   50.59
   5   6   0  152.88   31.80
   5   6   0  213.98   33.30
  -5  -6   0  228.48   48.20
  -5  -6   0  273.37   33.10
  -5  -6   0  233.08   37.10
  -5  -6   0  218.18   36.40
   5   5   0   72.49   29.00
   5   5   0  128.99   22.30
   5   5   0  168.08   32.00
   5   5   0   92.89   26.20
   5   5   0  151.48   23.00
   5   5   0  110.89   28.20
  -5  -5   0  118.69   29.50
  -5  -5   0  118.89   26.90
  -5  -5   0  146.39   26.70
  -5  -5   0  107.19   24.10
  -5  -5   0   84.69   32.90
  -5  -5   0  111.79   27.30
   5   4   0  355.76   46.10
   5   4   0  339.07   40.70
   5   4   0  297.27   26.60
   5   4   0  346.77   43.60
   5   4   0  319.07   31.50
   5   4   0  307.97   36.50
  -5  -4   0  306.27   36.20
  -5  -4   0  324.97   33.50
  -5  -4   0  345.27   31.20
  -5  -4   0  347.77   51.99
  -5  -4   0  351.56   32.30
  -5  -4   0  380.16   33.70
   5   3   0  442.06   35.30
   5   3   0  453.75   38.80
   5   3   0  443.06   27.70
   5   3   0  444.56   28.40
  -5  -3   0  461.05   33.10
  -5  -3   0  450.95   21.50
  -5  -3   0  433.36   33.30
  -5  -3   0  449.26   29.80
  -5  -3   0  486.35   43.60
  -5  -3   0  436.66   29.00
  -5  -3   0  408.56   28.00
   5   1   0  614.44   35.40
   5   1   0  524.35   28.10
   5   1   0  527.85   27.40
   5   1   0  547.15   30.60
   5   1   0  569.84   25.20
   5   1   0  520.45   30.80
  -5  -1   0  563.84   25.90
  -5  -1   0  549.95   29.20
  -5  -1   0  560.94   28.60
  -5  -1   0  618.24   36.90
  -5  -1   0  514.25   32.30
  -5  -1   0  562.94   30.80
   5  -1   0  542.75   30.40
   5  -1   0  550.04   26.70
   5  -1   0  524.25   30.30
   5  -1   0  571.94   25.40
   5  -1   0  538.15   27.10
   5  -1   0  570.24   27.00
  -5   1   0  510.75   24.90
  -5   1   0  544.15   28.20
  -5   1   0  591.94   30.90
  -5   1   0  552.84   25.70
  -5   1   0  596.14   32.60
  -5   1   0  565.34   26.80
   5  -3   0  460.75   30.20
   5  -3   0  513.65   30.00
   5  -3   0  469.75   31.80
   5  -3   0  447.66   26.80
   5  -3   0  484.75   33.50
   5  -3   0  479.55   30.60
  -5   3   0  466.75   35.70
  -5   3   0  494.85   29.80
  -5   3   0  466.85   28.30
  -5   3   0  477.55   27.70
  -5   3   0  373.56   35.40
  -5   3   0  542.45   49.60
   5  -4   0  365.66   32.40
   5  -4   0  310.57   33.80
   5  -4   0  330.47   32.30
   5  -4   0  334.87   31.80
   5  -4   0  325.07   28.80
   5  -4   0  365.66   38.40
  -5   4   0  332.27   33.40
  -5   4   0  447.86   36.80
  -5   4   0  445.56   41.40
  -5   4   0  420.66   31.70
  -5   4   0  330.87   29.50
  -5   4   0  350.06   43.70
   5  -5   0  132.09   26.30
   5  -5   0  143.79   26.20
   5  -5   0  101.79   27.30
   5  -5   0   96.89   20.50
   5  -5   0  119.59   23.50
   5  -5   0  127.49   22.80
  -5   5   0  108.79   24.40
  -5   5   0   96.49   26.90
  -5   5   0  134.19   36.20
  -5   5   0   89.49   34.10
  -5   5   0   97.89   23.10
  -5   5   0   88.59   21.50
  -5   5   0   92.89   23.60
   5  -6   0  181.68   33.30
   5  -6   0  236.18   46.20
   5  -6   0  192.88   26.80
   5  -6   0  287.87   43.60
   5  -6   0  154.28   25.90
   5  -6   0  206.28   26.20
  -5   6   0  183.88   35.50
  -5   6   0  251.97   46.10
  -5   6   0  180.28   38.60
  -5   6   0  226.78   27.90
  -5   6   0  343.87   51.49
  -5   6   0  206.08   26.80
  -5   6   0  163.68   39.40
   6   6   0   16.10   22.60
   6   6   0   72.99   31.40
   6   6   0   55.99   24.20
   6   6   0   85.59   45.20
   6   6   0   18.30   32.80
  -6  -6   0   82.89   41.10
  -6  -6   0   89.69   36.40
  -6  -6   0   66.29   29.40
  -6  -6   0   58.99   34.50
  -6  -6   0   76.99   26.50
   6   5   0  456.25   37.70
   6   5   0  429.56   52.39
   6   5   0  449.46   43.10
   6   5   0  361.36   46.70
   6   5   0  437.46   48.60
   6   5   0  452.95   58.09
  -6  -5   0  456.95   42.80
  -6  -5   0  445.46   41.30
  -6  -5   0  478.95   60.19
  -6  -5   0  413.46   40.80
  -6  -5   0  459.95   38.80
  -6  -5   0  426.26   39.80
   6   4   0  368.76   32.30
   6   4   0  331.07   61.09
   6   4   0  387.86   33.10
   6   4   0  381.86   42.50
   6   4   0  480.35   58.09
  -6  -4   0  368.46   35.00
  -6  -4   0  324.07   55.59
  -6  -4   0  380.36   39.20
  -6  -4   0  364.86   20.10
  -6  -4   0  390.86   35.30
  -6  -4   0  491.25   52.49
  -6  -4   0  408.66   49.99
   6   3   0  669.43   42.10
   6   3   0  654.03   33.40
   6   3   0  681.63   45.00
   6   3   0  735.63   34.60
   6   3   0  617.94   39.80
  -6  -3   0  646.24   38.70
  -6  -3   0  678.43   29.80
  -6  -3   0  686.83   38.30
  -6  -3   0  640.64   35.30
  -6  -3   0  676.73   34.30
  -6  -3   0  671.33   34.10
  -6  -3   0  640.64   49.50
   6   2   0 4553.54  129.59
   6   2   0 4609.54  135.19
   6   2   0 4707.13  129.99
   6   2   0 4783.92  130.59
   6   2   0 4295.27  125.49
   6   2   0 4528.45  126.39
   6   2   0 4389.46  125.99
  -6  -2   0 4339.47  126.49
  -6  -2   0 4511.25  125.89
  -6  -2   0 4425.36  127.99
  -6  -2   0 4614.54  127.99
  -6  -2   0 4654.63  126.99
   6   1   0  272.47   22.10
   6   1   0  254.77   27.10
   6   1   0  245.18   25.50
   6   1   0  225.48   25.50
   6   1   0  297.97   25.90
   6   1   0  325.27   34.00
   6   1   0  264.87   29.70
  -6  -1   0  274.07   28.60
  -6  -1   0  291.47   28.50
  -6  -1   0  320.07   36.20
  -6  -1   0  252.17   25.40
  -6  -1   0  317.57   36.40
  -6  -1   0  336.37   27.40
  -6   0   0 6717.53  184.48
   6  -1   0  254.17   22.50
   6  -1   0  324.47   25.30
   6  -1   0  292.57   29.00
   6  -1   0  284.57   25.50
   6  -1   0  247.58   26.30
   6  -1   0  277.27   25.40
  -6   1   0  268.67   23.20
  -6   1   0  291.37   26.50
  -6   1   0  319.77   25.60
  -6   1   0  357.16   26.20
  -6   1   0  275.47   31.00
  -6   1   0  281.17   29.90
   6  -2   0 4478.05  127.79
   6  -2   0 4522.65  125.29
   6  -2   0 4547.84  128.49
   6  -2   0 4452.35  124.39
   6  -2   0 4648.44  124.19
   6  -2   0 4520.05  125.09
  -6   2   0 4470.45  128.69
  -6   2   0 4394.46  124.39
  -6   2   0 4621.14  127.39
  -6   2   0 4235.78  123.69
  -6   2   0 4291.17  123.99
  -6   2   0 4287.17  128.29
  -6   2   0 4558.94  128.89
   6  -3   0  634.74   35.20
   6  -3   0  667.93   36.80
   6  -3   0  708.93   35.40
   6  -3   0  707.13   34.10
   6  -3   0  622.14   31.80
  -6   3   0  632.74   41.40
  -6   3   0  699.93   37.40
  -6   3   0  658.83   34.30
  -6   3   0  673.23   33.10
  -6   3   0  685.93   33.70
  -6   3   0  670.83   33.70
  -6   3   0  608.04   40.00
   6  -4   0  384.76   33.30
   6  -4   0  368.86   43.20
   6  -4   0  374.36   31.00
   6  -4   0  386.96   39.60
   6  -4   0  407.56   36.20
  -6   4   0  388.86   45.30
  -6   4   0  369.36   32.20
  -6   4   0  441.56   37.30
  -6   4   0  381.16   49.40
  -6   4   0  378.76   43.70
  -6   4   0  359.86   34.30
   6  -5   0  471.95   39.60
   6  -5   0  412.46   33.60
   6  -5   0  425.56   36.50
   6  -5   0  436.36   38.10
   6  -5   0  426.46   46.50
   6  -5   0  390.96   40.70
  -6   5   0  383.06   38.30
  -6   5   0  478.55   52.39
  -6   5   0  431.66   38.80
  -6   5   0  445.56   47.80
  -6   5   0  444.36   35.10
  -6   5   0  387.66   36.50
   6  -6   0   43.50   21.50
   6  -6   0   56.89   23.40
   6  -6   0   48.20   33.80
   6  -6   0   28.90   24.10
   6  -6   0   38.00   26.80
   6  -6   0   80.39   37.30
  -6   6   0   57.39   24.20
  -6   6   0   87.49   45.00
  -6   6   0   49.70   43.60
  -6   6   0   22.80   39.80
  -6   6   0   44.10   23.50
  -6   6   0   89.79   32.10
  -6   6   0  -20.70   35.30
   7   6   0   16.30   29.70
   7   6   0   15.80   32.90
   7   6   0   -9.90   22.70
   7   6   0   32.10   29.20
   7   6   0   65.69   35.60
   7   6   0   -3.90   24.00
  -7  -6   0   16.50   25.80
  -7  -6   0   64.49   36.40
  -7  -6   0   64.99   37.30
  -7  -6   0    8.60   27.00
  -7  -6   0   47.50   29.60
  -7  -6   0   48.80   29.10
   7   5   0  362.26   35.80
   7   5   0  301.87   47.20
   7   5   0  403.36   51.29
   7   5   0  325.57   50.79
   7   5   0  389.66   60.09
   7   5   0  310.87   35.10
  -7  -5   0  334.57   37.70
  -7  -5   0  360.36   41.50
  -7  -5   0  364.36   42.60
  -7  -5   0  362.66   38.70
  -7  -5   0  412.36   41.60
  -7  -5   0  267.67   58.79
   7   4   0   18.80   26.40
   7   4   0   29.30   22.20
   7   4   0   27.10   19.10
   7   4   0   21.60   18.00
   7   4   0   24.20   22.00
  -7  -4   0   56.89   23.60
  -7  -4   0   26.10   21.80
  -7  -4   0   34.10   14.60
  -7  -4   0   35.60   20.80
  -7  -4   0   39.40   23.90
  -7  -4   0   42.50   24.30
  -7  -4   0    2.00   27.10
   7   3   0  556.14   29.70
   7   3   0  470.35   34.20
   7   3   0  481.75   31.80
   7   3   0  502.25   39.10
   7   3   0  500.05   43.50
   7   3   0  460.85   28.60
  -7  -3   0  497.25   28.30
  -7  -3   0  449.46   48.60
  -7  -3   0  469.55   33.90
  -7  -3   0  450.95   29.60
  -7  -3   0  496.55   32.50
  -7  -3   0  469.35   38.30
  -7  -3   0  479.65   33.30
   7   2   0 2876.01   85.89
   7   2   0 2937.71   89.89
   7   2   0 2820.32   85.99
   7   2   0 2930.51   86.09
   7   2   0 3067.39   96.09
   7   2   0 2946.21   89.89
   7   2   0 2877.31   91.59
   7   2   0 2951.10   89.69
  -7  -2   0 2798.22   86.29
  -7  -2   0 2984.80   86.49
  -7  -2   0 2950.60   88.59
  -7  -2   0 2729.93   97.79
  -7  -2   0 2884.41   87.99
  -7  -2   0 2819.12   85.29
   7   1   0 5590.44  153.38
   7   1   0 5874.41  162.78
   7   1   0 5597.34  155.28
   7   1   0 5762.12  154.08
   7   1   0 5296.97  155.38
   7   1   0 5682.43  156.18
   7   1   0 5591.24  155.78
  -7  -1   0 5485.45  154.08
  -7  -1   0 5817.42  155.48
  -7  -1   0 5473.55  163.18
  -7  -1   0 5515.85  153.68
  -7  -1   0 5448.65  154.68
  -7  -1   0 5651.23  156.48
   7   0   0  623.84   31.10
   7   0   0  624.74   31.70
   7   0   0  612.54   34.30
   7   0   0  635.94   31.20
   7   0   0  573.84   32.50
   7   0   0  563.94   32.80
  -7   0   0  577.04   33.80
  -7   0   0  589.04   40.90
  -7   0   0  524.75   31.50
  -7   0   0  627.14   37.00
  -7   0   0  548.65   28.70
  -7   0   0  534.55   31.70
  -7   0   0  546.85   30.70
   7  -1   0 5666.73  155.38
   7  -1   0 5658.83  155.98
   7  -1   0 5817.12  157.08
   7  -1   0 5342.77  158.78
   7  -1   0 5764.12  155.88
   7  -1   0 5692.23  155.88
  -7   1   0 5671.73  156.28
  -7   1   0 5638.24  157.78
  -7   1   0 5721.23  156.08
  -7   1   0 5703.93  155.98
  -7   1   0 5635.94  160.08
  -7   1   0 5665.53  155.68
  -7   1   0 5668.63  155.38
   7  -2   0 2918.31   86.39
   7  -2   0 2958.10   89.69
   7  -2   0 2896.91   90.99
   7  -2   0 2979.10   87.49
   7  -2   0 2953.10   86.39
   7  -2   0 2910.21   86.29
  -7   2   0 2880.51   88.89
  -7   2   0 2808.12   86.29
  -7   2   0 3032.30   92.39
  -7   2   0 3018.80   86.79
  -7   2   0 2911.41   86.89
  -7   2   0 2901.41   86.29
  -7   2   0 2931.61   91.09
   7  -3   0  468.95   30.70
   7  -3   0  513.55   33.60
   7  -3   0  503.65   37.90
   7  -3   0  444.36   33.50
   7  -3   0  483.75   31.60
   7  -3   0  511.75   35.90
  -7   3   0  491.15   31.90
  -7   3   0  469.15   33.60
  -7   3   0  454.15   38.00
  -7   3   0  488.75   32.20
  -7   3   0  509.05   32.20
  -7   3   0  494.95   38.10
  -7   3   0  458.45   40.60
   7  -4   0   34.20   19.90
   7  -4   0    7.70   21.50
   7  -4   0   17.60   21.20
   7  -4   0   31.70   23.80
   7  -4   0   16.00   19.00
   7  -4   0   63.99   26.60
  -7   4   0   22.70   20.40
  -7   4   0   51.19   27.90
  -7   4   0   25.90   20.50
  -7   4   0   23.50   21.30
  -7   4   0   21.30   20.90
  -7   4   0   44.70   30.40
   7  -5   0  350.16   35.20
   7  -5   0  313.17   38.20
   7  -5   0  328.97   39.10
   7  -5   0  360.26   43.40
   7  -5   0  385.06   41.00
   7  -5   0  326.87   32.90
  -7   5   0  352.56   38.40
  -7   5   0  272.97   39.40
  -7   5   0  338.87   34.60
  -7   5   0  379.36   46.80
  -7   5   0  376.66   50.89
   7  -6   0   12.90   26.30
   7  -6   0   -1.90   23.10
   7  -6   0  -11.20   24.90
   7  -6   0    9.40   32.60
   7  -6   0   19.40   21.60
   7  -6   0   32.10   26.60
  -7   6   0  -26.90   26.10
  -7   6   0   22.10   24.30
  -7   6   0   30.30   23.80
  -7   6   0   53.99   35.90
  -7   6   0   57.39   32.90
  -7   6   0   56.99   44.60
  -7   6   0  -22.00   25.70
   8   5   0   38.60   26.90
   8   5   0   62.99   23.90
   8   5   0   62.89   23.60
   8   5   0   81.29   29.90
   8   5   0   46.90   29.80
  -8  -5   0   80.09   23.90
  -8  -5   0  110.99   29.00
  -8  -5   0   85.89   39.20
  -8  -5   0   76.19   26.70
  -8  -5   0   64.59   28.40
  -8  -5   0   86.19   28.50
   8   4   0  325.77   47.70
   8   4   0  405.66   35.70
   8   4   0  321.77   33.90
   8   4   0  310.17   46.10
  -8  -4   0  343.77   38.70
  -8  -4   0  356.16   36.50
  -8  -4   0  316.97   35.30
  -8  -4   0  296.77   42.40
  -8  -4   0  355.46   40.00
  -8  -4   0  324.47   40.40
  -8  -4   0  362.46   25.00
   8   3   0 1647.44   65.69
   8   3   0 1620.34   58.59
   8   3   0 1639.54   71.59
   8   3   0 1683.03   64.39
   8   3   0 1615.54   56.49
   8   3   0 1708.43   65.19
   8   3   0 1664.93   58.19
  -8  -3   0 1608.34   61.59
  -8  -3   0 1674.53   60.19
  -8  -3   0 1508.85   75.99
  -8  -3   0 1570.34   57.79
  -8  -3   0 1537.45   59.69
  -8  -3   0 1644.64   55.99
  -8  -3   0 1665.03   59.19
   8   2   0  297.97   35.30
   8   2   0  290.07   33.50
   8   2   0  322.47   37.60
   8   2   0  323.17   28.20
   8   2   0  270.77   31.40
   8   2   0  287.17   27.50
   8   2   0  271.47   27.60
   8   2   0  253.27   34.10
  -8  -2   0  305.47   32.60
  -8  -2   0  288.47   27.10
  -8  -2   0  305.47   29.30
  -8  -2   0  293.07   28.50
  -8  -2   0  275.87   32.40
  -8  -2   0  309.17   42.90
   8   1   0 1620.14   52.99
   8   1   0 1533.35   51.39
   8   1   0 1502.75   54.89
   8   1   0 1583.24   56.09
   8   1   0 1503.95   61.79
   8   1   0 1503.55   55.79
   8   1   0 1563.44   53.79
  -8  -1   0 1548.35   55.89
  -8  -1   0 1522.15   55.09
  -8  -1   0 1495.55   54.49
  -8  -1   0 1484.45   64.29
  -8  -1   0 1522.85   53.19
  -8  -1   0 1441.66   53.19
   8   0   0 1259.27   45.70
   8   0   0 1167.78   48.60
   8   0   0 1279.97   45.40
   8   0   0 1272.27   45.30
   8   0   0 1258.27   47.20
   8   0   0 1281.87   45.60
  -8   0   0 1223.88   47.20
  -8   0   0 1160.18   55.39
  -8   0   0 1263.87   50.79
  -8   0   0 1205.28   46.30
  -8   0   0 1260.57   47.20
  -8   0   0 1142.39   45.50
  -8   0   0 1175.18   43.70
   8  -1   0 1612.74   54.49
   8  -1   0 1495.65   51.59
   8  -1   0 1540.15   53.59
   8  -1   0 1563.14   51.59
   8  -1   0 1550.14   53.29
  -8   1   0 1519.55   58.59
  -8   1   0 1580.04   54.29
  -8   1   0 1537.15   56.09
  -8   1   0 1519.35   53.69
  -8   1   0 1515.25   53.19
  -8   1   0 1547.65   53.09
   8  -2   0  283.67   33.10
   8  -2   0  303.37   24.50
   8  -2   0  300.17   27.30
   8  -2   0  311.37   25.40
   8  -2   0  324.27   29.70
  -8   2   0  268.37   30.50
  -8   2   0  290.57   25.10
  -8   2   0  304.67   35.80
  -8   2   0  325.67   35.00
  -8   2   0  338.67   28.80
  -8   2   0  328.87   29.70
  -8   2   0  326.77   28.50
   8  -3   0 1579.94   57.59
   8  -3   0 1626.94   59.89
   8  -3   0 1691.03   64.39
   8  -3   0 1594.04   57.89
   8  -3   0 1626.64   47.30
   8  -3   0 1696.73   58.09
   8  -3   0 1690.63   63.99
  -8   3   0 1644.24   58.59
  -8   3   0 1549.84   56.39
  -8   3   0 1683.83   64.89
  -8   3   0 1631.94   60.99
  -8   3   0 1547.05   57.69
  -8   3   0 1646.54   63.19
  -8   3   0 1641.24   66.59
   8  -4   0  346.57   38.10
   8  -4   0  325.07   41.80
   8  -4   0  319.77   35.50
   8  -4   0  316.87   39.40
   8  -4   0  386.16   33.40
   8  -4   0  366.16   37.30
  -8   4   0  350.26   35.50
  -8   4   0  409.16   58.19
  -8   4   0  357.96   45.20
  -8   4   0  357.46   35.20
  -8   4   0  301.47   34.10
  -8   4   0  346.87   38.60
   8  -5   0   42.10   24.80
   8  -5   0   55.19   22.60
   8  -5   0   72.49   22.50
   8  -5   0   49.70   25.60
   8  -5   0   77.89   28.10
   8  -5   0   69.29   25.60
  -8   5   0   88.29   31.20
  -8   5   0   88.19   24.40
  -8   5   0   88.39   26.30
  -8   5   0   82.69   23.20
  -8   5   0   40.50   34.20
  -8   5   0   42.00   23.40
   9   5   0    4.40   29.90
   9   5   0  -29.60   42.30
   9   5   0    8.70   23.20
   9   5   0    6.00   35.30
   9   5   0   19.90   32.40
   9   5   0   33.70   28.90
   9   5   0   -0.40   22.90
  -9  -5   0   24.70   37.00
  -9  -5   0   43.00   27.80
  -9  -5   0   29.60   23.00
  -9  -5   0   21.80   28.50
  -9  -5   0   -0.90   25.10
  -9  -5   0    7.60   27.10
   9   4   0   42.40   22.50
   9   4   0   55.19   28.30
   9   4   0   77.19   30.40
   9   4   0   87.59   33.80
   9   4   0   70.29   23.80
  -9  -4   0   81.79   18.70
  -9  -4   0   74.99   26.30
  -9  -4   0   61.99   24.30
  -9  -4   0   68.59   35.80
  -9  -4   0   70.19   22.90
  -9  -4   0   66.29   26.80
  -9  -4   0   70.59   26.40
   9   3   0  526.85   36.80
   9   3   0  538.05   42.90
   9   3   0  463.35   46.80
   9   3   0  553.14   40.50
   9   3   0  480.15   56.89
   9   3   0  505.45   35.30
   9   3   0  590.34   38.50
   9   3   0  473.15   48.90
  -9  -3   0  530.65   40.30
  -9  -3   0  544.15   42.30
  -9  -3   0  544.75   35.30
  -9  -3   0  553.04   36.90
  -9  -3   0  593.74   67.49
  -9  -3   0  543.45   38.50
  -9  -3   0  477.85   57.19
   9   2   0  412.36   31.90
   9   2   0  356.46   31.40
   9   2   0  344.47   34.20
   9   2   0  367.36   36.80
   9   2   0  370.06   39.60
   9   2   0  349.07   31.70
   9   2   0  386.66   34.00
   9   2   0  395.16   42.10
  -9  -2   0  357.96   35.90
  -9  -2   0  335.67   48.00
  -9  -2   0  378.16   36.00
  -9  -2   0  370.46   34.20
  -9  -2   0  403.06   33.60
  -9  -2   0  375.36   32.80
   9   1   0  247.28   32.60
   9   1   0  308.57   29.30
   9   1   0  271.37   26.00
   9   1   0  350.56   29.70
   9   1   0  315.57   33.70
   9   1   0  304.17   30.40
  -9  -1   0  336.77   33.30
  -9  -1   0  328.37   42.20
  -9  -1   0  289.67   29.90
  -9  -1   0  270.77   32.20
  -9  -1   0  287.87   30.70
  -9  -1   0  281.87   29.10
   9   0   0 2970.30   91.79
   9   0   0 2955.60   95.29
   9   0   0 3058.19   90.89
   9   0   0 3030.80   91.19
   9   0   0 3217.18   93.19
   9   0   0 3153.18   90.69
  -9   0   0 3129.79   96.89
  -9   0   0 3178.18   91.99
  -9   0   0 2989.20   91.29
  -9   0   0 3042.60   90.49
  -9   0   0 2958.70  102.49
  -9   0   0 3027.80   92.39
  -9   0   0 3013.50   92.39
   9  -1   0  273.87   33.60
   9  -1   0  334.07   27.30
   9  -1   0  325.77   30.40
   9  -1   0  321.17   28.40
   9  -1   0  363.06   31.00
   9  -1   0  327.07   26.30
  -9   1   0  306.27   28.90
  -9   1   0  333.97   31.60
  -9   1   0  326.37   26.70
  -9   1   0  303.57   26.80
  -9   1   0  325.87   35.80
  -9   1   0  345.27   33.30
  -9   1   0  318.37   27.50
   9  -2   0  385.66   37.90
   9  -2   0  351.76   30.90
   9  -2   0  359.36   28.70
   9  -2   0  384.76   31.50
   9  -2   0  358.46   31.60
  -9   2   0  387.96   33.90
  -9   2   0  361.56   31.80
  -9   2   0  362.96   34.30
  -9   2   0  356.96   38.70
  -9   2   0  417.56   38.00
  -9   2   0  349.57   28.60
  -9   2   0  359.36   34.10
   9  -3   0  520.25   40.50
   9  -3   0  664.33   60.29
   9  -3   0  519.15   43.50
   9  -3   0  503.45   23.50
   9  -3   0  485.95   56.39
   9  -3   0  513.15   36.70
  -9   3   0  440.06   38.40
  -9   3   0  477.65   36.40
  -9   3   0  577.34   45.10
  -9   3   0  536.75   39.70
  -9   3   0  546.75   42.20
  -9   3   0  543.85   77.09
   9  -4   0   83.69   25.10
   9  -4   0   57.59   21.60
   9  -4   0   75.09   28.50
   9  -4   0   35.10   22.60
   9  -4   0   48.40   25.30
   9  -4   0   94.59   30.20
  -9   4   0   40.00   22.80
  -9   4   0   52.29   24.10
  -9   4   0   64.89   28.90
  -9   4   0   49.10   21.40
  -9   4   0   55.69   30.40
  -9   4   0   60.29   23.10
   9  -5   0   25.90   24.50
   9  -5   0  -18.60   29.50
   9  -5   0    2.50   25.00
   9  -5   0   -2.80   24.10
   9  -5   0   20.40   24.80
   9  -5   0   -8.50   21.90
  -9   5   0   -2.10   37.00
  -9   5   0   24.40   24.60
  -9   5   0  -29.20   23.50
  -9   5   0   20.50   23.50
  -9   5   0  -35.50   24.00
  -9   5   0   51.69   32.30
  10   5   0   52.69   38.60
  10   5   0  118.89   37.20
  10   5   0   29.60   24.30
  10   5   0   97.99   32.40
  10   5   0  126.19   48.00
  10   5   0   12.80   41.60
 -10  -5   0   45.20   26.20
 -10  -5   0   84.99   26.40
 -10  -5   0   86.19   45.70
 -10  -5   0   72.19   65.79
 -10  -5   0   63.29   28.40
 -10  -5   0   49.60   31.50
  10   4   0   57.69   24.10
  10   4   0   40.10   31.10
  10   4   0   55.29   23.50
  10   4   0   60.09   30.70
 -10  -4   0   67.19   19.90
 -10  -4   0   39.70   28.20
 -10  -4   0   48.60   26.60
 -10  -4   0   46.40   25.30
 -10  -4   0   38.60   25.90
 -10  -4   0   37.20   22.30
  10   3   0  439.66   36.40
  10   3   0  424.76   37.60
  10   3   0  465.55   62.09
  10   3   0  402.06   35.50
  10   3   0  428.26   46.00
  10   3   0  426.16   43.40
  10   3   0  400.36   47.60
  10   3   0  367.36   49.40
 -10  -3   0  420.16   36.00
 -10  -3   0  456.05   36.60
 -10  -3   0  367.46   56.59
 -10  -3   0  411.06   35.00
 -10  -3   0  395.26   40.10
 -10  -3   0  405.76   40.50
  10   2   0  432.36   42.70
  10   2   0  473.75   35.30
  10   2   0  403.16   35.80
  10   2   0  443.36   37.50
  10   2   0  434.66   53.19
  10   2   0  431.36   35.50
  10   2   0  476.25   60.19
  10   2   0  452.55   42.30
 -10  -2   0  404.66   35.10
 -10  -2   0  296.97   51.39
 -10  -2   0  433.66   34.30
 -10  -2   0  412.66   35.60
 -10  -2   0  438.06   38.10
 -10  -2   0  470.05   37.30
  10   1   0  327.67   35.90
  10   1   0  369.16   37.00
  10   1   0  345.17   31.20
  10   1   0  332.67   31.60
  10   1   0  379.76   35.00
  10   1   0  344.87   31.90
 -10  -1   0  332.27   30.60
 -10  -1   0  334.37   35.10
 -10  -1   0  326.27   33.60
 -10  -1   0  384.26   36.00
 -10  -1   0  264.87   45.60
 -10  -1   0  350.46   36.30
  10   0   0 1506.25   52.49
  10   0   0 1488.15   54.39
  10   0   0 1439.96   54.49
  10   0   0 1485.25   53.89
  10   0   0 1490.45   56.49
  10   0   0 1385.66   58.39
 -10   0   0 1328.17   55.29
 -10   0   0 1558.94   56.79
 -10   0   0 1479.55   56.09
 -10   0   0 1494.05   60.99
 -10   0   0 1451.15   54.59
 -10   0   0 1387.46   52.79
 -10   0   0 1381.36   66.69
 -10   0   0 1499.45   54.19
  10  -1   0  354.06   32.10
  10  -1   0  339.57   33.40
  10  -1   0  390.76   37.60
  10  -1   0  337.77   31.40
  10  -1   0  375.76   33.90
  10  -1   0  371.86   32.60
 -10   1   0  353.66   33.20
 -10   1   0  305.27   42.90
 -10   1   0  356.06   36.30
 -10   1   0  336.77   34.90
 -10   1   0  335.87   32.40
 -10   1   0  366.66   38.70
 -10   1   0  333.27   32.40
 -10   1   0  341.17   30.40
  10  -2   0  464.05   36.00
  10  -2   0  392.96   32.60
  10  -2   0  438.86   38.70
  10  -2   0  519.25   44.00
  10  -2   0  484.25   36.70
  10  -2   0  472.55   36.60
 -10   2   0  471.25   36.30
 -10   2   0  492.45   38.90
 -10   2   0  481.15   37.60
 -10   2   0  522.15   41.00
 -10   2   0  462.25   38.80
 -10   2   0  492.15   45.00
 -10   2   0  464.25   41.80
  10  -3   0  466.15   38.10
  10  -3   0  435.26   38.50
  10  -3   0  415.16   23.60
  10  -3   0  446.66   44.50
  10  -3   0  401.46   34.30
  10  -3   0  446.66   37.90
 -10   3   0  400.36   42.30
 -10   3   0  454.65   46.30
 -10   3   0  438.96   38.20
 -10   3   0  542.65   46.80
 -10   3   0  401.46   34.50
 -10   3   0  491.65   43.20
 -10   3   0  422.26   37.90
  10  -4   0   55.19   25.00
  10  -4   0   53.69   26.20
  10  -4   0   75.29   23.40
  10  -4   0   24.90   23.00
  10  -4   0   89.79   23.30
 -10   4   0   80.99   34.80
 -10   4   0   75.29   33.90
 -10   4   0   30.60   25.10
 -10   4   0   38.90   24.40
 -10   4   0   25.70   28.80
  10  -5   0   24.50   31.00
  10  -5   0   64.49   35.40
  10  -5   0   52.39   24.50
  10  -5   0   66.19   24.60
  10  -5   0   34.50   36.00
 -10   5   0   48.00   34.70
 -10   5   0  105.39   57.39
 -10   5   0   49.80   36.40
 -10   5   0  110.59   27.30
 -10   5   0   97.59   38.80
  11   5   0   86.49   38.90
  11   5   0   13.10   26.40
  11   5   0   14.00   26.10
  11   5   0   87.79   39.10
  11   5   0   32.90   31.90
  11   5   0  102.59   62.99
 -11  -5   0  104.09   32.00
 -11  -5   0   25.60   35.00
 -11  -5   0   78.49   25.10
 -11  -5   0  108.29   34.10
 -11  -5   0   68.39   33.80
 -11  -5   0   26.80   42.70
  11   4   0  500.85   54.39
  11   4   0  346.07   35.30
  11   4   0  393.96   46.70
  11   4   0  313.97   54.89
 -11  -4   0  404.86   44.60
 -11  -4   0  456.95   43.30
 -11  -4   0  342.77   44.00
 -11  -4   0  303.77   46.80
 -11  -4   0  397.16   32.80
 -11  -4   0  353.26   44.90
  11   3   0  322.07   46.90
  11   3   0  266.97   40.00
  11   3   0  273.47   49.40
  11   3   0  301.27   32.50
  11   3   0  365.76   48.10
  11   3   0  332.57   38.20
  11   3   0  303.57   36.40
  11   3   0  288.17   35.20
 -11  -3   0  268.07   43.20
 -11  -3   0  303.07   35.70
 -11  -3   0  304.27   39.50
 -11  -3   0  302.87   40.60
 -11  -3   0  310.87   42.00
 -11  -3   0  296.67   37.40
 -11  -3   0  305.97   35.60
  11   2   0   53.29   20.70
  11   2   0   45.60   23.30
  11   2   0   86.49   28.90
  11   2   0   42.00   28.40
  11   2   0   38.40   22.70
  11   2   0   17.20   28.40
  11   2   0   23.30   21.30
  11   2   0   74.59   22.60
 -11  -2   0   75.99   27.20
 -11  -2   0   25.60   28.20
 -11  -2   0   81.19   26.80
 -11  -2   0   70.09   33.70
 -11  -2   0   35.10   24.10
 -11  -2   0   57.39   24.80
  11   1   0  530.35   45.80
  11   1   0  594.14   40.00
  11   1   0  572.84   38.20
  11   1   0  577.34   44.30
  11   1   0  604.04   41.50
  11   1   0  600.24   35.50
  11   1   0  614.04   38.80
 -11  -1   0  596.04   38.80
 -11  -1   0  576.64   36.90
 -11  -1   0  554.74   40.40
 -11  -1   0  561.34   42.50
 -11  -1   0  639.64   44.40
 -11  -1   0  518.45   87.09
  11   0   0  129.49   26.00
  11   0   0  168.28   29.10
  11   0   0   95.49   22.70
  11   0   0  127.39   21.20
  11   0   0  176.58   24.40
  11   0   0  157.28   25.10
 -11   0   0  114.49   29.50
 -11   0   0  152.18   26.60
 -11   0   0  112.49   27.00
 -11   0   0  120.29   23.70
 -11   0   0  136.09   25.00
 -11   0   0  144.49   24.90
 -11   0   0  123.79   25.20
 -11   0   0  140.49   28.80
  11  -1   0  549.54   49.30
  11  -1   0  599.64   39.10
  11  -1   0  556.54   40.40
  11  -1   0  556.54   40.70
  11  -1   0  594.14   38.30
  11  -1   0  567.94   38.20
 -11   1   0  562.34   39.60
 -11   1   0  532.85   39.50
 -11   1   0  590.54   74.29
 -11   1   0  497.45   41.10
 -11   1   0  561.34   40.60
 -11   1   0  522.35   62.89
 -11   1   0  585.54   43.00
 -11   1   0  574.64   39.30
  11  -2   0   51.19   25.00
  11  -2   0   52.79   22.90
  11  -2   0   71.99   24.20
  11  -2   0   51.79   24.40
  11  -2   0   63.69   23.00
 -11   2   0   46.80   26.70
 -11   2   0   55.69   25.30
 -11   2   0   69.09   29.20
 -11   2   0   66.59   27.30
 -11   2   0   59.39   23.60
 -11   2   0   64.59   26.30
  11  -3   0  301.37   37.80
  11  -3   0  276.17   38.30
  11  -3   0  325.27   42.50
  11  -3   0  298.07   37.40
  11  -3   0  365.86   36.30
  11  -3   0  311.57   37.60
 -11   3   0  250.97   34.10
 -11   3   0  245.68   36.40
 -11   3   0  285.77   38.50
 -11   3   0  365.66   46.00
 -11   3   0  325.27   33.70
 -11   3   0  267.67   37.80
 -11   3   0  269.07   42.30
  11  -4   0  324.57   41.60
  11  -4   0  340.27   51.59
  11  -4   0  376.66   40.10
  11  -4   0  387.96   39.00
 -11   4   0  371.96   47.30
 -11   4   0  361.36   38.80
 -11   4   0  383.36   45.10
 -11   4   0  327.67   39.80
 -11   4   0  357.56   49.50
  11  -5   0   57.79   26.10
  11  -5   0   41.90   25.10
  11  -5   0   47.40   27.10
  11  -5   0   68.19   28.90
  11  -5   0   70.89   34.20
 -11   5   0   65.99   27.20
 -11   5   0   32.40   36.70
 -11   5   0  -28.60   28.10
 -11   5   0  100.89   34.60
 -11   5   0   92.89   28.20
  12   4   0  141.39   43.70
  12   4   0  280.57   50.99
  12   4   0  141.59   29.40
  12   4   0  167.58   34.50
  12   4   0  113.69   27.40
  12   4   0  189.18   37.60
 -12  -4   0  215.08   29.70
 -12  -4   0  183.78   31.20
 -12  -4   0  232.98   32.80
 -12  -4   0  184.48   34.50
 -12  -4   0  225.08   34.90
 -12  -4   0  114.99   44.70
 -12  -4   0  143.79   30.70
  12   3   0  529.25   42.50
  12   3   0  495.25   44.70
  12   3   0  600.34   52.99
  12   3   0  532.75   56.29
  12   3   0  490.35   57.89
  12   3   0  624.94   58.29
  12   3   0  588.84   42.50
  12   3   0  582.44   43.10
 -12  -3   0  542.15   47.00
 -12  -3   0  631.24   48.40
 -12  -3   0  561.54   41.00
 -12  -3   0  543.05   42.10
 -12  -3   0  578.54   76.49
 -12  -3   0  560.84   44.90
  12   2   0  749.62   53.89
  12   2   0  800.22   46.00
  12   2   0  993.20   66.89
  12   2   0  901.81   55.49
  12   2   0  766.42   47.60
  12   2   0  897.51   76.19
  12   2   0  731.53   57.89
  12   2   0  741.63   46.20
 -12  -2   0  860.41   49.80
 -12  -2   0  761.12   48.30
 -12  -2   0  742.73   68.19
 -12  -2   0  837.42   48.70
 -12  -2   0  838.32   48.50
 -12  -2   0  905.41   53.99
  12   1   0  236.48   32.50
  12   1   0  239.48   39.20
  12   1   0  273.37   41.20
  12   1   0  252.77   31.50
  12   1   0  222.58   52.29
  12   1   0  256.07   31.40
  12   1   0  241.78   33.70
 -12  -1   0  263.37   38.60
 -12  -1   0  180.58   28.00
 -12  -1   0  341.17   51.09
 -12  -1   0  242.48   33.60
 -12  -1   0  303.57   50.69
  12   0   0   80.89   26.70
  12   0   0   53.79   23.90
  12   0   0   73.99   29.90
  12   0   0   50.99   24.20
  12   0   0  100.29   25.60
  12   0   0   62.89   23.30
 -12   0   0   85.59   26.40
 -12   0   0   23.80   26.00
 -12   0   0   50.19   28.20
 -12   0   0   65.89   27.10
 -12   0   0   82.29   25.30
 -12   0   0   19.10   24.10
 -12   0   0   59.09   23.30
  12  -1   0  247.18   35.20
  12  -1   0  261.47   38.90
  12  -1   0  262.67   34.30
  12  -1   0  314.07   40.70
  12  -1   0  209.58   31.50
  12  -1   0  245.98   36.00
 -12   1   0  247.18   30.40
 -12   1   0  284.67   32.90
 -12   1   0  264.37   35.90
 -12   1   0  265.67   38.70
 -12   1   0  300.17   45.30
 -12   1   0  224.58   37.30
 -12   1   0  218.48   31.60
 -12   1   0  287.47   39.90
  12  -2   0  802.72   46.80
  12  -2   0  839.02   47.80
  12  -2   0  691.13   50.99
  12  -2   0  780.52   46.60
  12  -2   0  801.92   48.50
  12  -2   0  834.72   41.80
  12  -2   0  859.01   47.50
 -12   2   0  826.92   52.69
 -12   2   0  932.81   57.79
 -12   2   0  788.82   49.20
 -12   2   0  825.12   48.40
 -12   2   0  826.12   50.59
  12  -3   0  537.05   29.80
  12  -3   0  558.94   43.10
  12  -3   0  491.35   45.00
  12  -3   0  380.16   50.89
  12  -3   0  428.76   38.00
  12  -3   0  540.15   44.20
  12  -3   0  515.95   28.40
 -12   3   0  557.94   48.50
 -12   3   0  568.34   72.19
 -12   3   0  508.45   51.99
 -12   3   0  512.35   39.20
 -12   3   0  597.04   44.10
 -12   3   0  498.45   51.39
  12  -4   0  133.09   30.10
  12  -4   0  134.49   32.10
  12  -4   0  137.19   27.70
  12  -4   0  124.49   27.00
 -12   4   0  117.69   43.40
 -12   4   0  177.78   31.50
 -12   4   0  179.68   39.90
 -12   4   0  133.09   33.60
 -12   4   0  160.48   30.40
  13   4   0  143.59   36.90
  13   4   0   58.39   24.10
  13   4   0   81.59   29.60
  13   4   0   34.00   30.00
  13   4   0  -25.00   26.80
  13   4   0  -17.50   30.00
  13   4   0   37.30   34.40
  13   4   0  110.89   38.30
 -13  -4   0   26.20   30.80
 -13  -4   0   10.10   28.80
 -13  -4   0   30.50   24.60
 -13  -4   0   77.09   32.00
 -13  -4   0   50.59   31.60
 -13  -4   0   49.70   24.00
 -13  -4   0   30.50   41.70
  13   3   0  326.17   51.19
  13   3   0  276.47   36.20
  13   3   0  306.97   40.80
  13   3   0  263.77   32.20
  13   3   0  325.07   39.70
  13   3   0  209.78   37.20
  13   3   0  392.16   50.19
  13   3   0  416.36   54.49
 -13  -3   0  324.87   45.30
 -13  -3   0  359.76   40.90
 -13  -3   0  382.16   57.49
 -13  -3   0  211.08   59.29
 -13  -3   0  328.67   44.10
 -13  -3   0  208.78   32.20
 -13  -3   0  327.17   38.40
  13   2   0  112.09   25.60
  13   2   0  100.09   26.60
  13   2   0  155.28   33.60
  13   2   0  125.89   33.50
  13   2   0   94.49   28.50
  13   2   0  196.08   35.40
  13   2   0  175.48   32.00
 -13  -2   0   92.19   27.50
 -13  -2   0  115.29   29.60
 -13  -2   0  122.69   30.50
 -13  -2   0  133.69   31.70
 -13  -2   0  148.39   32.70
  13   1   0  156.28   28.30
  13   1   0  120.69   29.00
  13   1   0  160.88   27.00
  13   1   0  249.97   35.50
  13   1   0  218.98   33.60
  13   1   0  204.28   29.50
  13   1   0  140.09   25.70
 -13  -1   0  211.88   31.60
 -13  -1   0  136.29   28.10
 -13  -1   0  197.08   30.50
 -13  -1   0  114.59   26.10
 -13  -1   0  174.18   38.30
 -13  -1   0  216.58   35.50
  13   0   0    0.40   27.40
  13   0   0   17.50   22.80
  13   0   0   11.20   26.50
  13   0   0   -4.10   21.70
  13   0   0  -14.80   43.80
  13   0   0   21.20   24.40
  13   0   0   43.40   46.90
 -13   0   0    7.80   26.70
 -13   0   0   32.70   23.80
 -13   0   0   -7.50   30.60
 -13   0   0   -6.00   26.10
 -13   0   0   41.90   25.80
 -13   0   0   14.60   26.10
 -13   0   0   26.50   26.90
  13  -1   0  167.88   27.70
  13  -1   0  197.08   29.40
  13  -1   0  223.38   30.30
  13  -1   0  134.29   25.10
  13  -1   0  184.58   27.50
  13  -1   0  186.28   32.00
  13  -1   0  187.58   28.20
 -13   1   0  223.08   35.40
 -13   1   0  190.08   35.90
 -13   1   0  129.89   26.10
 -13   1   0  113.69   31.10
 -13   1   0  128.99   25.60
 -13   1   0  185.28   34.70
 -13   1   0  210.18   32.20
 -13   1   0  152.38   27.90
  13  -2   0   72.79   26.70
  13  -2   0  116.19   28.70
  13  -2   0  143.39   29.00
  13  -2   0  120.19   23.30
  13  -2   0  119.39   28.20
  13  -2   0   87.09   26.10
 -13   2   0   76.49   28.60
 -13   2   0  129.29   30.90
 -13   2   0   85.19   31.90
 -13   2   0  137.49   74.59
 -13   2   0  146.89   30.50
 -13   2   0   94.39   28.90
 -13   2   0  108.09   29.10
 -13   2   0  110.69   31.10
  13  -3   0  205.28   29.90
  13  -3   0  277.27   26.00
  13  -3   0  343.37   40.80
  13  -3   0  305.47   27.80
  13  -3   0  339.57   41.90
  13  -3   0  284.67   41.50
 -13   3   0  231.08   34.20
 -13   3   0  293.87   41.40
 -13   3   0  327.17   45.20
 -13   3   0  329.97   46.90
 -13   3   0  302.57   42.40
 -13   3   0  246.38   37.40
  13  -4   0   -3.80   25.00
  13  -4   0   12.70   26.40
  13  -4   0   59.69   26.70
  13  -4   0    6.00   26.70
 -13   4   0  -28.00   27.60
 -13   4   0  -22.40   41.30
 -13   4   0   60.39   36.10
 -13   4   0    4.10   33.70
 -13   4   0   26.30   26.80
  14   3   0    1.80   24.10
  14   3   0  131.59   38.60
  14   3   0   69.59   27.90
  14   3   0   50.29   27.30
  14   3   0   12.70   38.20
  14   3   0   -3.70   27.60
  14   3   0   93.29   34.30
  14   3   0   51.29   36.60
 -14  -3   0   36.90   30.90
 -14  -3   0   43.10   26.30
 -14  -3   0   46.40   28.10
 -14  -3   0   51.99   27.90
 -14  -3   0   -9.40   43.30
 -14  -3   0   59.19   32.60
 -14  -3   0   29.60   39.60
  14   2   0  250.47   39.30
  14   2   0  138.99   29.30
  14   2   0   99.59   26.20
  14   2   0  158.28   29.90
  14   2   0  124.09   28.40
 -14  -2   0  198.68   34.40
 -14  -2   0  156.58   29.60
 -14  -2   0  141.39   32.00
 -14  -2   0  124.49   39.10
 -14  -2   0  243.88   36.80
 -14  -2   0  156.68   30.10
  14   1   0   51.89   30.30
  14   1   0   24.30   22.90
  14   1   0   83.29   47.90
  14   1   0   74.29   31.20
  14   1   0   11.70   23.80
  14   1   0   20.50   30.00
 -14  -1   0   47.10   27.10
 -14  -1   0   50.69   31.90
 -14  -1   0   40.70   29.00
 -14  -1   0   31.30   33.90
  14   0   0   16.90   25.60
  14   0   0  -26.20   24.60
  14   0   0    4.90   29.10
  14   0   0  -13.70   25.20
  14   0   0   -2.60   22.10
  14   0   0  -14.50   27.70
  14   0   0   14.30   23.40
 -14   0   0   -9.30   29.50
 -14   0   0   28.90   26.40
 -14   0   0   21.30   26.00
 -14   0   0   17.30   24.60
 -14   0   0   -6.80   27.80
 -14   0   0  -12.00   28.40
 -14   0   0  -36.90   45.60
  14  -1   0   46.70   30.50
  14  -1   0   18.90   24.70
  14  -1   0   35.50   27.50
  14  -1   0   41.90   25.10
  14  -1   0   59.89   27.00
  14  -1   0   19.70   25.40
  14  -1   0   70.59   29.80
 -14   1   0   48.80   31.50
 -14   1   0   28.50   29.80
 -14   1   0   50.69   29.10
 -14   1   0   -8.80   26.00
 -14   1   0   24.40   25.00
 -14   1   0   44.30   27.90
 -14   1   0   43.20   31.50
 -14   1   0   21.60   27.10
  14  -2   0  229.38   35.50
  14  -2   0  260.87   37.90
  14  -2   0  196.28   30.70
  14  -2   0  186.48   30.20
 -14   2   0  128.69   27.30
 -14   2   0  184.38   34.50
 -14   2   0  223.78   34.40
 -14   2   0  173.08   58.29
 -14   2   0  183.48   36.80
 -14   2   0  318.47   51.49
  14  -3   0   18.10   31.40
  14  -3   0   28.90   16.90
  14  -3   0   48.20   18.90
  14  -3   0   74.79   29.90
  14  -3   0   11.40   27.10
 -14   3   0    9.40   29.00
 -14   3   0   80.49   31.50
 -14   3   0   36.80   34.80
 -14   3   0   48.80   31.30
 -14   3   0   46.80   34.10
  15   2   0  138.29   45.10
  15   2   0   92.79   30.10
  15   2   0  202.48   41.50
  15   2   0  314.87   46.30
  15   2   0  183.78   37.90
 -15  -2   0   69.39   31.40
 -15  -2   0  168.68   34.80
 -15  -2   0  199.48   37.70
 -15  -2   0  127.79   30.50
  15   1   0   56.99   30.40
  15   1   0  -13.50   23.90
  15   1   0   -3.50   27.00
  15   1   0   -0.90   30.80
  15   1   0   20.40   24.50
  15   1   0   12.10   30.40
 -15  -1   0   38.20   31.00
 -15  -1   0    7.20   27.40
 -15  -1   0   13.30   32.10
 -15  -1   0   -0.60   27.20
 -15  -1   0   -5.40   35.20
 -15  -1   0    7.40   30.00
  15   0   0    5.80   24.80
  15   0   0   31.10   30.30
  15   0   0  -43.00   22.60
  15   0   0  -13.30   42.50
  15   0   0  -17.70   23.50
  15   0   0   17.90   27.40
  15   0   0   76.09   41.70
 -15   0   0   10.20   29.90
 -15   0   0   11.60   29.00
 -15   0   0  -29.80   36.10
 -15   0   0   28.50   34.50
 -15   0   0   -7.30   28.30
 -15   0   0  -10.60   29.40
 -15   0   0   33.70   47.70
  15  -1   0   24.60   27.00
  15  -1   0  -19.00   26.20
  15  -1   0   60.29   46.90
  15  -1   0   -2.80   25.10
  15  -1   0    4.20   32.70
  15  -1   0   61.89   31.70
  15  -1   0   61.89   29.00
 -15   1   0   29.30   34.30
 -15   1   0   40.60   31.30
 -15   1   0   39.00   36.70
 -15   1   0  -29.20   30.10
 -15   1   0   34.20   30.00
 -15   1   0   27.40   28.30
 -15   1   0   65.59   30.00
 -15   1   0   21.60   37.50
  15  -2   0   24.90   37.20
  15  -2   0   56.49   25.60
  15  -2   0  219.88   35.50
  15  -2   0  134.09   28.20
  15  -2   0   70.49   32.30
  15  -2   0  132.09   31.30
 -15   2   0  110.49   31.20
 -15   2   0   84.19   50.79
 -15   2   0   59.19   29.80
 -15   2   0  119.89   33.90
 -15   2   0  143.89   33.50
 -15   2   0  174.58   38.10
 -15   2   0  253.67   49.80
  16   1   0   36.70   29.80
  16   1   0   57.59   33.30
  16   1   0   45.10   28.00
  16   1   0  -30.40   26.90
  16   1   0  160.88   37.60
  16   1   0   44.90   29.40
 -16  -1   0   47.40   29.80
 -16  -1   0   68.09   31.50
 -16  -1   0   77.59   33.70
 -16  -1   0   82.69   33.50
 -16  -1   0  -15.70   37.70
 -16  -1   0   21.40   29.90
 -16  -1   0   81.59   36.20
  16   0   0  155.98   35.20
  16   0   0   91.59   51.69
  16   0   0    3.80   25.30
  16   0   0   79.09   27.20
  16   0   0  -13.80   44.10
  16   0   0   54.49   42.00
 -16   0   0   37.90   31.00
 -16   0   0   51.59   32.60
 -16   0   0   27.60   28.20
 -16   0   0  196.38   72.29
 -16   0   0   59.19   28.90
 -16   0   0  -26.40   38.70
  16  -1   0   -8.50   29.00
  16  -1   0   -1.20   25.10
  16  -1   0   72.29   27.00
  16  -1   0   84.89   37.80
  16  -1   0   71.59   31.10
  16  -1   0   77.89   32.70
 -16   1   0   78.29   33.10
 -16   1   0  114.19   35.20
 -16   1   0   14.00   32.30
 -16   1   0   90.39   37.30
 -16   1   0  200.28   44.90
 -16   1  -1  137.19   35.70
 -16   1  -1  114.59   35.60
 -16   1  -1  189.08   36.80
 -16   1  -1  143.09   37.40
 -16   1  -1   98.19   32.20
 -16   1  -1  220.98   39.40
  16  -1   1  129.99   31.90
  16  -1   1  152.28   36.50
  16  -1   1  207.48   38.60
  16  -1   1  153.28   32.10
 -16   0  -1   71.09   30.50
 -16   0  -1  125.79   34.30
 -16   0  -1   82.39   32.70
 -16   0  -1    9.90   41.80
 -16   0  -1   68.09   33.60
 -16   0  -1  132.39   41.00
  16   0   1   69.99   26.00
  16   0   1   87.69   31.90
  16   0   1   16.10   29.80
  16   0   1  135.59   33.00
  16   0   1   27.30   30.90
  16   0   1   81.29   35.60
 -16  -1  -1  209.38   54.69
 -16  -1  -1  116.29   31.70
 -16  -1  -1  129.19   36.20
 -16  -1  -1  116.49   35.90
  16   1   1  113.29   37.10
  16   1   1  177.98   37.10
  16   1   1  125.09   28.90
 -15   2  -1   58.29   31.30
 -15   2  -1   68.29   34.20
 -15   2  -1  130.89   38.80
 -15   2  -1   40.20   31.80
 -15   2  -1   36.90   39.50
 -15   2  -1   24.60   28.90
 -15   2  -1   70.89   33.70
 -15   2  -1  108.39   36.00
  15  -2   1  135.99   33.70
  15  -2   1   30.50   39.60
  15  -2   1  107.29   31.60
  15  -2   1   99.49   26.10
  15  -2   1    9.70   27.10
  15  -2   1  110.09   37.20
 -15   1  -1  -34.70   30.40
 -15   1  -1  -11.90   27.50
 -15   1  -1   -5.90   29.20
 -15   1  -1   34.80   33.10
 -15   1  -1   21.30   46.50
 -15   1  -1  -54.19   38.60
 -15   1  -1   -3.30   27.40
 -15   1  -1    8.90   31.60
  15  -1   1   12.40   26.00
  15  -1   1   -1.50   29.90
  15  -1   1   31.80   24.20
  15  -1   1  -17.90   25.30
  15  -1   1   37.20   29.90
  15  -1   1   22.00   42.30
  15  -1   1  -15.10   28.30
 -15   0  -1   53.69   42.40
 -15   0  -1   93.99   37.30
 -15   0  -1   94.39   32.60
 -15   0  -1   58.19   29.40
 -15   0  -1  102.49   29.40
 -15   0  -1   33.90   27.50
 -15   0  -1  113.99   34.10
  15   0   1  116.49   27.30
  15   0   1  140.39   34.00
  15   0   1   61.09   28.40
  15   0   1   47.40   28.50
  15   0   1   42.40   27.70
  15   0   1   83.99   30.70
  15   0   1  157.28   34.40
 -15  -1  -1  -50.59   27.80
 -15  -1  -1   -5.90   27.40
 -15  -1  -1   -1.60   29.10
 -15  -1  -1  -43.20   40.70
 -15  -1  -1   23.30   31.20
 -15  -1  -1  -17.00   29.10
 -15  -1  -1   56.99   28.50
  15   1   1   -1.40   31.40
  15   1   1    6.00   26.60
  15   1   1   72.89   30.90
  15   1   1  -32.30   22.90
  15   1   1  -48.20   25.20
  15   1   1   -4.60   28.10
 -15  -2  -1   95.99   33.90
 -15  -2  -1   62.49   32.20
 -15  -2  -1   75.09   32.10
 -15  -2  -1   85.89   33.40
 -15  -2  -1   40.70   30.70
 -15  -2  -1    5.80   59.99
  15   2   1  147.09   35.10
  15   2   1   31.50   28.30
  15   2   1   32.00   26.00
  15   2   1   96.89   33.50
  15   2   1  174.48   38.20
  15   2   1   68.39   27.70
 -14   3  -1  168.48   42.80
 -14   3  -1   81.69   36.20
 -14   3  -1   49.60   28.60
 -14   3  -1   63.09   35.00
 -14   3  -1   69.09   27.20
 -14   3  -1   54.79   42.90
 -14   3  -1   42.40   34.20
  14  -3   1   72.69   32.60
  14  -3   1  100.19   19.40
  14  -3   1  105.09   35.40
  14  -3   1    0.60   26.30
  14  -3   1   79.19   26.40
 -14   2  -1   32.10   41.50
 -14   2  -1   87.59   32.10
 -14   2  -1   46.90   26.40
 -14   2  -1   42.30   26.20
 -14   2  -1    4.00   27.80
 -14   2  -1   35.00   36.30
 -14   2  -1   49.80   30.40
 -14   2  -1   11.40   28.40
  14  -2   1   47.30   29.30
  14  -2   1   49.00   35.20
  14  -2   1   -3.40   23.10
  14  -2   1  107.89   31.10
  14  -2   1   44.10   22.90
  14  -2   1    3.70   22.70
 -14   1  -1   20.60   25.70
 -14   1  -1   61.29   29.20
 -14   1  -1   47.40   28.40
 -14   1  -1   39.00   36.30
 -14   1  -1   40.70   31.60
 -14   1  -1   18.30   29.30
 -14   1  -1   36.10   29.80
 -14   1  -1    0.00   28.10
  14  -1   1   31.30   33.10
  14  -1   1   11.50   24.70
  14  -1   1   12.70   23.00
  14  -1   1   71.39   29.70
  14  -1   1   73.79   29.40
  14  -1   1  100.89   45.00
  14  -1   1   53.29   24.80
 -14   0  -1  -11.60   28.10
 -14   0  -1    0.30   28.90
 -14   0  -1   -0.90   34.10
 -14   0  -1   -3.80   25.60
 -14   0  -1   37.30   33.80
 -14   0  -1   17.00   28.90
 -14   0  -1   18.90   27.40
  14   0   1   34.60   27.60
  14   0   1   42.50   31.10
  14   0   1  -19.00   24.40
  14   0   1   27.30   28.90
  14   0   1   -7.30   22.40
  14   0   1    3.60   26.60
  14   0   1  -19.90   24.60
 -14  -1  -1   24.70   27.90
 -14  -1  -1   69.39   32.50
 -14  -1  -1   41.00   48.00
 -14  -1  -1   18.80   37.40
 -14  -1  -1   36.30   28.70
 -14  -1  -1   63.79   29.90
  14   1   1   73.89   37.50
  14   1   1   51.69   30.30
  14   1   1    2.80   25.20
  14   1   1   18.50   25.20
  14   1   1   70.59   24.50
  14   1   1   44.60   31.40
 -14  -2  -1   40.60   28.50
 -14  -2  -1   54.09   28.50
 -14  -2  -1   20.00   26.10
 -14  -2  -1   34.60   30.40
 -14  -2  -1   69.79   31.60
 -14  -2  -1   14.60   39.60
  14   2   1   30.60   26.70
  14   2   1   66.89   46.10
  14   2   1    0.90   26.20
  14   2   1   66.89   34.90
  14   2   1   84.39   34.50
  14   2   1  -19.00   22.30
  14   2   1   37.80   25.70
 -14  -3  -1   77.29   29.30
 -14  -3  -1   81.49   43.20
 -14  -3  -1   77.69   32.00
 -14  -3  -1    9.40   43.40
 -14  -3  -1   58.39   28.70
 -14  -3  -1   75.99   30.00
  14   3   1  137.59   36.10
  14   3   1   23.30   28.30
  14   3   1  132.89   32.60
  14   3   1   30.20   25.60
  14   3   1   14.60   25.60
  14   3   1   55.09   30.30
 -13   4  -1   65.89   37.90
 -13   4  -1  139.09   37.90
 -13   4  -1  117.19   32.10
 -13   4  -1   94.49   30.10
  13  -4   1  105.59   29.80
  13  -4   1  119.29   30.30
 -13   3  -1   26.40   25.50
 -13   3  -1    5.60   27.30
 -13   3  -1   43.60   26.50
 -13   3  -1   65.19   36.30
 -13   3  -1   -1.40   26.80
 -13   3  -1   43.00   30.10
 -13   3  -1   68.79   30.10
  13  -3   1   11.70   24.20
  13  -3   1   12.50   25.40
  13  -3   1   41.10   26.80
  13  -3   1   58.29   16.40
  13  -3   1   27.20   26.90
  13  -3   1   20.80   25.20
 -13   2  -1  340.77   40.90
 -13   2  -1  241.78   41.70
 -13   2  -1  255.27   35.00
 -13   2  -1  329.67   50.29
 -13   2  -1  146.29   44.60
 -13   2  -1  288.17   41.80
 -13   2  -1  257.77   33.00
 -13   2  -1  304.67   39.40
  13  -2   1  256.07   33.00
  13  -2   1  298.27   41.60
  13  -2   1  322.97   45.00
  13  -2   1  217.78   28.70
 -13   1  -1  269.97   54.39
 -13   1  -1  334.87   42.00
 -13   1  -1  313.67   40.40
 -13   1  -1  362.76   49.50
 -13   1  -1  357.86   43.70
 -13   1  -1  362.66   41.30
 -13   1  -1  319.27   40.20
 -13   1  -1  318.17   45.50
  13  -1   1  297.67   43.80
  13  -1   1  370.76   40.10
  13  -1   1  352.86   43.00
  13  -1   1  342.97   39.60
  13  -1   1  362.36   44.00
  13  -1   1  349.27   36.00
  13  -1   1  285.07   38.70
 -13   0  -1   41.40   47.50
 -13   0  -1   51.09   27.80
 -13   0  -1   28.20   28.20
 -13   0  -1   65.89   45.00
 -13   0  -1   63.09   33.50
 -13   0  -1   28.60   29.40
 -13   0  -1   50.39   26.20
  13   0   1   54.49   29.20
  13   0   1   55.59   23.00
  13   0   1   32.30   24.50
  13   0   1   23.30   24.00
  13   0   1   66.89   31.40
  13   0   1   47.30   34.50
  13   0   1   64.89   29.40
 -13  -1  -1  312.97   43.60
 -13  -1  -1  388.36   47.40
 -13  -1  -1  306.77   59.29
 -13  -1  -1  294.47   39.00
 -13  -1  -1  298.17   41.20
 -13  -1  -1  334.37   40.10
  13   1   1  257.17   41.40
  13   1   1  288.07   44.60
  13   1   1  233.58   29.00
  13   1   1  366.26   47.30
  13   1   1  321.77   35.00
  13   1   1  343.27   43.10
  13   1   1  404.76   42.10
 -13  -2  -1  288.27   42.80
 -13  -2  -1  278.17   47.80
 -13  -2  -1  302.67   43.20
 -13  -2  -1  331.67   44.90
 -13  -2  -1  346.77   40.50
 -13  -2  -1  292.77   35.10
  13   2   1  247.38   30.30
  13   2   1  285.27   41.60
  13   2   1  329.07   41.80
  13   2   1  381.76   49.50
  13   2   1  256.07   35.30
  13   2   1  378.56   50.49
 -13  -3  -1   64.49   30.60
 -13  -3  -1   37.30   26.80
 -13  -3  -1   83.89   32.30
 -13  -3  -1   37.20   29.30
 -13  -3  -1   56.59   27.00
 -13  -3  -1   39.40   27.20
 -13  -3  -1   21.10   38.50
  13   3   1   32.00   27.00
  13   3   1   96.59   34.70
  13   3   1   36.30   31.60
  13   3   1   55.09   34.90
  13   3   1   55.39   30.70
  13   3   1   76.79   28.70
  13   3   1   41.80   25.60
  13   3   1  -14.60   22.50
 -13  -4  -1  115.49   34.70
 -13  -4  -1   90.89   31.60
  13   4   1   17.70   28.80
  13   4   1  211.68   43.80
  13   4   1  102.09   32.40
 -12   4  -1   -7.30   39.30
 -12   4  -1   79.99   27.10
 -12   4  -1   51.19   33.00
 -12   4  -1   67.29   28.70
 -12   4  -1   66.29   43.30
  12  -4   1   38.70   29.10
  12  -4   1   22.90   36.00
  12  -4   1   52.79   25.80
  12  -4   1   78.19   25.90
 -12   3  -1  349.47   43.50
 -12   3  -1  385.86   49.10
 -12   3  -1  377.06   49.30
 -12   3  -1  307.97   42.90
 -12   3  -1  320.37   40.10
 -12   3  -1  321.57   39.60
  12  -3   1  283.17   39.70
  12  -3   1  343.87   39.70
  12  -3   1  360.86   38.90
  12  -3   1  207.38   42.20
  12  -3   1  343.47   41.40
  12  -3   1  315.47   27.30
 -12   2  -1  735.73   46.20
 -12   2  -1  760.82   49.20
 -12   2  -1  714.93   52.49
 -12   2  -1  684.93   55.19
 -12   2  -1  793.42   47.50
 -12   2  -1  743.23   45.90
 -12   2  -1  710.43   45.70
  12  -2   1  762.02   45.40
  12  -2   1  711.83   40.30
  12  -2   1  800.92   43.80
  12  -2   1  693.73   50.99
  12  -2   1  742.83   45.40
  12  -2   1  785.62   47.10
 -12   1  -1  180.78   32.50
 -12   1  -1  172.88   29.20
 -12   1  -1  136.49   28.30
 -12   1  -1  222.98   48.90
 -12   1  -1  107.99   25.90
 -12   1  -1  125.19   33.80
 -12   1  -1  187.78   30.30
 -12   1  -1  113.89   26.60
  12  -1   1  202.88   30.20
  12  -1   1  212.88   28.00
  12  -1   1  190.28   45.60
  12  -1   1  151.98   28.10
  12  -1   1  123.49   26.10
  12  -1   1  171.18   25.20
  12  -1   1  128.29   23.30
 -12   0  -1  305.27   40.80
 -12   0  -1  274.17   39.60
 -12   0  -1  221.48   29.70
 -12   0  -1  252.27   37.20
 -12   0  -1  252.67   44.20
 -12   0  -1  244.28   37.20
  12   0   1  259.97   28.20
  12   0   1  236.58   38.20
  12   0   1  263.97   31.40
  12   0   1  241.68   35.60
  12   0   1  251.17   31.60
  12   0   1  265.57   40.30
  12   0   1  315.57   33.30
 -12  -1  -1  156.18   28.30
 -12  -1  -1  151.48   48.70
 -12  -1  -1  241.78   36.80
 -12  -1  -1  214.48   30.40
 -12  -1  -1  124.39   34.30
 -12  -1  -1  148.19   28.80
  12   1   1  132.49   27.20
  12   1   1  159.68   25.10
  12   1   1  128.09   31.10
  12   1   1  202.88   27.80
  12   1   1  222.28   33.50
  12   1   1  201.08   33.00
  12   1   1   91.89   22.10
 -12  -2  -1  814.62   51.09
 -12  -2  -1  638.24   66.49
 -12  -2  -1  757.42   50.39
 -12  -2  -1  767.02   48.20
 -12  -2  -1  690.53   47.60
  12   2   1  761.32   46.10
  12   2   1  656.13   47.40
  12   2   1  893.31   55.89
  12   2   1  800.72   55.09
  12   2   1  770.62   54.39
  12   2   1  700.13   44.40
  12   2   1  717.63   43.70
 -12  -3  -1  365.86   44.50
 -12  -3  -1  262.87   39.50
 -12  -3  -1  292.87   44.90
 -12  -3  -1  349.37   39.80
 -12  -3  -1  302.47   59.79
 -12  -3  -1  313.17   37.80
 -12  -3  -1  322.67   45.70
  12   3   1  332.87   40.00
  12   3   1  309.07   51.99
  12   3   1  322.47   35.60
  12   3   1  384.86   44.70
  12   3   1  339.87   49.20
  12   3   1  378.36   52.59
  12   3   1  336.17   40.60
 -12  -4  -1   53.49   46.00
 -12  -4  -1   79.19   31.40
 -12  -4  -1   53.99   27.80
 -12  -4  -1   79.19   25.10
 -12  -4  -1   94.19   31.00
 -12  -4  -1   74.99   24.80
  12   4   1   65.19   31.20
  12   4   1  139.89   41.70
  12   4   1  -10.40   34.20
  12   4   1   22.30   26.30
  12   4   1   41.90   26.90
  12   4   1   25.00   41.30
 -11   4  -1  141.09   37.00
 -11   4  -1  146.49   34.00
 -11   4  -1   77.79   27.00
 -11   4  -1  136.29   28.70
 -11   4  -1   97.89   27.80
 -11   4  -1  196.18   46.90
  11  -4   1   61.69   25.60
  11  -4   1   97.69   24.90
  11  -4   1   91.59   25.20
  11  -4   1  130.39   28.40
 -11   3  -1  134.39   26.00
 -11   3  -1  203.58   36.20
 -11   3  -1  187.78   30.00
 -11   3  -1  221.08   34.40
 -11   3  -1  115.59   24.80
 -11   3  -1  208.48   29.60
 -11   3  -1  136.79   31.60
  11  -3   1  189.78   27.10
  11  -3   1  200.48   26.30
  11  -3   1  170.18   22.60
  11  -3   1  153.38   26.90
  11  -3   1  211.58   35.90
  11  -3   1  124.59   24.80
 -11   2  -1  524.65   39.90
 -11   2  -1  577.04   47.80
 -11   2  -1  479.45   39.20
 -11   2  -1  604.74   40.80
 -11   2  -1  569.64   41.80
 -11   2  -1  549.54   43.20
 -11   2  -1  504.45   48.60
  11  -2   1  529.25   46.70
  11  -2   1  549.85   39.70
  11  -2   1  469.25   39.00
  11  -2   1  534.95   40.70
  11  -2   1  573.44   41.40
  11  -2   1  525.35   33.80
 -11   1  -1  151.28   25.50
 -11   1  -1  143.39   42.80
 -11   1  -1  155.28   30.00
 -11   1  -1  115.59   26.80
 -11   1  -1  156.38   27.60
 -11   1  -1  234.58   45.80
 -11   1  -1  157.88   27.00
 -11   1  -1  162.38   33.30
  11  -1   1  150.18   28.10
  11  -1   1  164.48   25.60
  11  -1   1  179.38   31.60
  11  -1   1  161.18   24.90
  11  -1   1  148.89   23.00
  11  -1   1  196.88   25.80
  11  -1   1  194.18   28.10
 -11   0  -1  314.17   31.80
 -11   0  -1  369.06   34.00
 -11   0  -1  305.87   36.10
 -11   0  -1  303.57   36.10
 -11   0  -1  355.76   42.40
 -11   0  -1  309.47   38.00
 -11   0  -1  314.07   56.69
 -11   0  -1  372.16   39.10
  11   0   1  333.07   38.50
  11   0   1  320.67   30.50
  11   0   1  353.86   53.89
  11   0   1  337.07   35.00
  11   0   1  382.06   31.70
  11   0   1  301.67   34.10
  11   0   1  341.17   39.40
 -11  -1  -1  143.89   35.00
 -11  -1  -1  149.69   24.50
 -11  -1  -1  143.39   26.20
 -11  -1  -1  188.48   29.10
 -11  -1  -1  241.08   34.10
 -11  -1  -1  172.28   27.60
  11   1   1  130.59   24.90
  11   1   1  170.38   28.90
  11   1   1  142.29   22.40
  11   1   1  161.28   24.30
  11   1   1  168.48   24.70
  11   1   1  144.69   29.00
  11   1   1  177.88   30.80
 -11  -2  -1  556.44   46.20
 -11  -2  -1  581.24   41.10
 -11  -2  -1  541.25   42.60
 -11  -2  -1  520.55   44.20
 -11  -2  -1  525.85   41.80
 -11  -2  -1  452.65   58.99
  11   2   1  461.95   38.20
  11   2   1  473.15   50.69
  11   2   1  545.15   40.00
  11   2   1  564.74   48.20
  11   2   1  540.85   49.40
  11   2   1  508.45   36.20
  11   2   1  471.75   42.10
  11   2   1  482.85   47.00
 -11  -3  -1  160.78   30.80
 -11  -3  -1  129.69   28.80
 -11  -3  -1  177.08   28.60
 -11  -3  -1  125.19   37.80
 -11  -3  -1  126.59   25.20
 -11  -3  -1  203.68   30.40
 -11  -3  -1  108.89   27.50
  11   3   1  189.98   36.60
  11   3   1  192.88   27.80
  11   3   1  228.88   31.10
  11   3   1  240.08   36.50
  11   3   1  206.38   35.20
  11   3   1  236.68   36.70
 -11  -4  -1  129.69   30.90
 -11  -4  -1  101.39   29.30
 -11  -4  -1  158.38   42.70
 -11  -4  -1  148.29   32.50
 -11  -4  -1  134.09   25.20
 -11  -4  -1  110.39   29.50
 -11  -4  -1  118.39   27.30
  11   4   1  156.58   35.50
  11   4   1   87.99   34.10
  11   4   1  111.89   35.10
  11   4   1  120.39   27.90
  11   4   1   88.69   26.50
  11   4   1  213.18   38.40
 -10   5  -1   36.40   28.40
 -10   5  -1  119.89   27.00
 -10   5  -1  107.59   32.30
 -10   5  -1   88.19   32.70
 -10   5  -1  120.29   70.09
 -10   5  -1  101.09   27.40
  10  -5   1   83.59   28.50
  10  -5   1  105.49   25.60
  10  -5   1   73.59   25.00
  10  -5   1  116.09   28.40
 -10   4  -1  143.09   25.60
 -10   4  -1  102.29   26.00
 -10   4  -1   98.49   27.40
 -10   4  -1  124.29   50.49
 -10   4  -1   87.19   32.10
  10  -4   1  115.69   23.90
  10  -4   1   96.79   25.80
  10  -4   1  113.29   23.30
  10  -4   1  109.39   26.10
  10  -4   1  137.59   33.30
 -10   3  -1  207.38   32.00
 -10   3  -1  244.58   42.80
 -10   3  -1  211.38   33.80
 -10   3  -1  171.78   26.30
 -10   3  -1  117.39   23.00
 -10   3  -1  133.09   26.20
 -10   3  -1  122.59   25.90
  10  -3   1  197.58   33.80
  10  -3   1  163.38   17.50
  10  -3   1  164.98   26.00
  10  -3   1  157.88   25.60
  10  -3   1  170.48   17.70
  10  -3   1  169.98   25.90
 -10   2  -1  214.28   27.30
 -10   2  -1  223.78   28.30
 -10   2  -1  197.98   30.30
 -10   2  -1  234.68   33.60
 -10   2  -1  249.38   33.20
 -10   2  -1  183.98   26.60
  10  -2   1  188.68   24.70
  10  -2   1  241.68   40.80
  10  -2   1  201.48   28.90
  10  -2   1  232.58   32.00
  10  -2   1  227.68   25.70
  10  -2   1  191.38   38.50
 -10   1  -1   45.80   25.40
 -10   1  -1   29.30   23.50
 -10   1  -1   35.00   21.20
 -10   1  -1   14.40   18.80
 -10   1  -1   28.40   22.10
 -10   1  -1   22.80   19.70
 -10   1  -1   34.00   19.70
 -10   1  -1   25.70   18.90
  10  -1   1   48.50   18.80
  10  -1   1   30.10   19.30
  10  -1   1   48.80   25.60
  10  -1   1   53.79   18.90
  10  -1   1   43.20   21.60
  10  -1   1   41.20   19.90
  10  -1   1   23.50   18.00
 -10   0  -1  211.78   26.10
 -10   0  -1  196.78   25.00
 -10   0  -1  226.68   27.30
 -10   0  -1  215.38   31.30
 -10   0  -1  207.98   31.40
 -10   0  -1  200.78   28.90
 -10   0  -1  203.38   31.40
  10   0   1  229.58   26.90
  10   0   1  159.88   22.60
  10   0   1  162.38   22.90
  10   0   1  229.28   27.30
  10   0   1  215.58   30.30
  10   0   1  230.18   26.40
  10   0   1  250.27   31.40
 -10  -1  -1   67.49   24.80
 -10  -1  -1   41.50   21.70
 -10  -1  -1   54.99   23.40
 -10  -1  -1   23.30   19.50
 -10  -1  -1    7.20   23.60
 -10  -1  -1   29.60   21.90
  10   1   1   45.50   20.20
  10   1   1   72.09   25.50
  10   1   1   67.59   24.30
  10   1   1   41.30   22.10
  10   1   1   25.00   20.50
  10   1   1   42.90   19.30
  10   1   1   59.89   20.40
 -10  -2  -1  140.99   23.80
 -10  -2  -1  165.88   37.40
 -10  -2  -1  179.48   26.80
 -10  -2  -1  184.58   29.50
 -10  -2  -1  242.68   36.20
 -10  -2  -1  262.27   35.20
  10   2   1  324.47   46.80
  10   2   1  165.08   26.10
  10   2   1  197.18   39.30
  10   2   1  194.68   33.10
  10   2   1  209.98   29.70
  10   2   1  269.97   32.80
  10   2   1  214.38   29.50
  10   2   1  230.18   26.60
 -10  -3  -1  160.28   25.90
 -10  -3  -1   99.79   32.70
 -10  -3  -1  173.18   29.00
 -10  -3  -1  196.58   27.30
 -10  -3  -1  155.08   26.00
 -10  -3  -1  178.48   30.00
  10   3   1  145.89   29.70
  10   3   1  180.18   26.60
  10   3   1  187.88   35.20
  10   3   1  147.89   30.60
  10   3   1  179.58   30.60
  10   3   1  177.98   27.40
  10   3   1  167.78   24.50
 -10  -4  -1  129.49   28.90
 -10  -4  -1  217.48   35.00
 -10  -4  -1  121.19   25.70
 -10  -4  -1   92.59   45.00
 -10  -4  -1  145.09   24.00
 -10  -4  -1  117.99   31.00
 -10  -4  -1  153.68   32.70
  10   4   1  103.19   26.80
  10   4   1  125.09   33.80
  10   4   1  153.48   37.20
  10   4   1  113.79   45.50
  10   4   1  207.08   38.20
 -10  -5  -1  152.88   32.60
 -10  -5  -1  119.79   32.90
 -10  -5  -1  116.79   33.20
 -10  -5  -1  114.49   43.30
 -10  -5  -1   90.59   25.70
 -10  -5  -1  138.99   34.50
  10   5   1   44.60   32.30
  10   5   1  152.38   37.70
  10   5   1  102.79   27.80
  10   5   1  123.19   35.20
  10   5   1   81.89   34.80
  10   5   1   87.09   28.60
  10   5   1  176.68   42.20
  -9   5  -1  130.59   25.60
  -9   5  -1  216.68   39.00
  -9   5  -1  148.69   27.40
  -9   5  -1  103.19   28.10
  -9   5  -1  234.78   43.80
  -9   5  -1   57.59   26.70
   9  -5   1  148.39   25.20
   9  -5   1  107.99   30.20
   9  -5   1  123.09   25.20
   9  -5   1  181.58   34.20
   9  -5   1   93.99   29.90
   9  -5   1  191.78   30.80
  -9   4  -1  186.88   26.80
  -9   4  -1  263.27   38.30
  -9   4  -1  168.98   25.60
  -9   4  -1  176.78   26.60
  -9   4  -1  168.08   25.90
   9  -4   1  220.68   32.00
   9  -4   1  224.88   28.70
   9  -4   1  186.88   24.60
   9  -4   1  147.39   23.70
   9  -4   1  195.28   27.80
  -9   3  -1  732.33   50.89
  -9   3  -1  711.93   44.70
  -9   3  -1  684.53   41.90
  -9   3  -1  728.63   49.50
  -9   3  -1  668.63   40.70
  -9   3  -1  736.33   44.70
  -9   3  -1  705.13   40.50
   9  -3   1  722.73   38.00
   9  -3   1  648.94   58.99
   9  -3   1  728.23   41.80
   9  -3   1  676.73   40.10
   9  -3   1  745.83   40.40
  -9   2  -1  685.03   36.00
  -9   2  -1  679.63   37.50
  -9   2  -1  694.63   38.90
  -9   2  -1  715.43   45.30
  -9   2  -1  728.73   46.20
  -9   2  -1  698.63   35.20
  -9   2  -1  698.53   41.70
   9  -2   1  672.43   37.50
   9  -2   1  700.03   44.30
   9  -2   1  721.63   32.10
   9  -2   1  725.63   43.30
   9  -2   1  696.73   38.80
   9  -2   1  665.13   35.00
  -9   1  -1  457.95   33.40
  -9   1  -1  497.55   29.40
  -9   1  -1  477.15   37.00
  -9   1  -1  432.46   31.10
  -9   1  -1  449.56   33.00
  -9   1  -1  419.56   31.50
  -9   1  -1  474.55   39.70
   9  -1   1  457.35   28.90
   9  -1   1  437.46   36.30
   9  -1   1  446.86   30.10
   9  -1   1  466.15   31.40
   9  -1   1  467.75   32.80
   9  -1   1  485.95   31.10
   9  -1   1  430.96   31.10
  -9   0  -1  259.07   31.20
  -9   0  -1  231.98   34.80
  -9   0  -1  255.57   40.00
  -9   0  -1  235.68   28.50
  -9   0  -1  228.88   27.30
  -9   0  -1  253.97   28.80
  -9   0  -1  213.38   28.00
   9   0   1  185.48   26.50
   9   0   1  188.08   30.30
   9   0   1  224.58   24.70
   9   0   1  192.88   31.30
   9   0   1  230.98   31.60
   9   0   1  260.57   27.90
   9   0   1  241.68   24.50
  -9  -1  -1  473.05   32.80
  -9  -1  -1  448.06   36.20
  -9  -1  -1  424.96   46.40
  -9  -1  -1  454.95   30.40
  -9  -1  -1  455.25   37.60
  -9  -1  -1  453.05   33.70
   9   1   1  440.16   34.70
   9   1   1  447.66   30.90
   9   1   1  431.36   37.80
   9   1   1  488.45   32.30
   9   1   1  480.75   37.60
   9   1   1  427.46   29.20
   9   1   1  448.36   33.40
  -9  -2  -1  676.73   36.90
  -9  -2  -1  735.03   43.20
  -9  -2  -1  758.82   43.20
  -9  -2  -1  682.83   55.79
  -9  -2  -1  696.53   41.00
  -9  -2  -1  742.83   41.40
   9   2   1  698.43   39.80
   9   2   1  672.13   46.40
   9   2   1  747.53   45.70
   9   2   1  715.13   38.50
   9   2   1  649.83   37.80
   9   2   1  746.13   49.90
   9   2   1  655.83   40.90
   9   2   1  678.03   40.20
  -9  -3  -1  742.63   40.70
  -9  -3  -1  654.43   42.00
  -9  -3  -1  766.82   43.70
  -9  -3  -1  762.12   47.40
  -9  -3  -1  741.83   51.99
  -9  -3  -1  759.52   43.90
  -9  -3  -1  697.73   60.69
   9   3   1  711.03   52.79
   9   3   1  768.22   41.80
   9   3   1  803.42   50.19
   9   3   1  682.23   40.10
   9   3   1  676.53   51.49
   9   3   1  650.83   53.59
   9   3   1  746.43   46.50
   9   3   1  737.23   41.60
  -9  -4  -1  179.48   29.70
  -9  -4  -1  163.38   26.90
  -9  -4  -1  217.58   31.80
  -9  -4  -1  184.28   27.80
  -9  -4  -1  133.99   34.70
  -9  -4  -1  252.67   33.20
  -9  -4  -1  250.27   33.20
   9   4   1  173.98   25.20
   9   4   1  242.78   38.40
   9   4   1  194.18   27.10
   9   4   1  203.98   35.20
   9   4   1  232.08   36.20
  -9  -5  -1  121.29   41.20
  -9  -5  -1  165.38   31.50
  -9  -5  -1  124.99   30.40
  -9  -5  -1  189.38   35.20
  -9  -5  -1  183.28   30.10
  -9  -5  -1  155.68   32.10
   9   5   1   78.49   30.60
   9   5   1  143.39   35.20
   9   5   1  146.39   35.30
   9   5   1  126.19   27.00
   9   5   1  155.28   35.00
   9   5   1  109.69   30.60
  -8   5  -1  155.78   33.30
  -8   5  -1  126.49   36.30
  -8   5  -1  111.19   25.50
  -8   5  -1  149.29   26.90
  -8   5  -1  169.88   26.20
  -8   5  -1  187.18   26.20
   8  -5   1  163.88   24.90
   8  -5   1  131.19   28.20
   8  -5   1  177.78   24.90
   8  -5   1  148.99   28.20
   8  -5   1  214.98   36.90
   8  -5   1  125.19   26.80
  -8   4  -1  377.66   45.90
  -8   4  -1  352.76   34.80
  -8   4  -1  338.77   34.50
  -8   4  -1  302.47   36.00
  -8   4  -1  347.67   43.70
  -8   4  -1  357.66   36.50
   8  -4   1  392.86   32.70
   8  -4   1  441.16   43.30
   8  -4   1  338.07   41.10
   8  -4   1  372.26   35.20
   8  -4   1  345.77   36.20
   8  -4   1  349.27   39.40
  -8   3  -1 2045.30   88.69
  -8   3  -1 2070.39   77.19
  -8   3  -1 2110.39   75.39
  -8   3  -1 2044.30   68.59
  -8   3  -1 2058.29   72.49
  -8   3  -1 2082.89   70.89
  -8   3  -1 2062.99   69.39
   8  -3   1 2072.79   72.19
   8  -3   1 2095.19   68.19
   8  -3   1 2048.70   74.99
   8  -3   1 2055.69   68.19
   8  -3   1 2007.10   69.39
  -8   2  -1  380.16   32.10
  -8   2  -1  454.65   30.20
  -8   2  -1  434.16   30.60
  -8   2  -1  394.96   30.70
  -8   2  -1  401.16   37.70
  -8   2  -1  376.76   30.70
  -8   2  -1  411.06   37.70
   8  -2   1  407.86   36.40
   8  -2   1  452.65   30.20
   8  -2   1  412.26   29.80
   8  -2   1  443.66   30.10
   8  -2   1  385.96   27.80
   8  -2   1  379.76   29.60
  -8   1  -1 1340.27   49.50
  -8   1  -1 1353.16   55.49
  -8   1  -1 1277.47   47.20
  -8   1  -1 1355.16   49.60
  -8   1  -1 1322.47   52.69
  -8   1  -1 1335.67   48.20
  -8   1  -1 1260.07   48.20
   8  -1   1 1349.16   53.39
   8  -1   1 1355.56   48.20
   8  -1   1 1315.87   49.00
   8  -1   1 1355.36   48.30
   8  -1   1 1398.36   48.20
  -8   0  -1  705.83   41.20
  -8   0  -1  711.73   32.70
  -8   0  -1  688.43   35.50
  -8   0  -1  718.53   45.40
  -8   0  -1  757.52   37.40
  -8   0  -1  765.42   34.80
  -8   0  -1  653.73   34.20
   8   0   1  714.33   34.20
   8   0   1  718.43   37.30
   8   0   1  724.93   37.50
   8   0   1  784.02   32.90
   8   0   1  719.23   32.50
   8   0   1  747.73   38.60
   8   0   1  740.13   37.00
  -8  -1  -1 1220.08   49.10
  -8  -1  -1 1277.47   48.60
  -8  -1  -1 1341.37   51.49
  -8  -1  -1 1283.37   46.60
  -8  -1  -1 1199.98   59.59
  -8  -1  -1 1370.46   50.69
   8   1   1 1421.16   57.89
   8   1   1 1335.07   47.70
   8   1   1 1285.37   47.40
   8   1   1 1268.37   50.59
   8   1   1 1257.47   51.39
   8   1   1 1333.57   47.10
   8   1   1 1223.78   48.80
   8   1   1 1229.28   52.49
  -8  -2  -1  378.36   29.60
  -8  -2  -1  411.16   46.30
  -8  -2  -1  393.16   31.90
  -8  -2  -1  416.56   36.10
  -8  -2  -1  413.36   35.20
  -8  -2  -1  416.66   32.10
   8   2   1  393.16   31.60
   8   2   1  429.06   27.70
   8   2   1  420.26   30.80
   8   2   1  389.26   32.90
   8   2   1  396.06   36.90
   8   2   1  427.76   40.30
   8   2   1  371.56   37.30
   8   2   1  380.16   38.60
  -8  -3  -1 2017.00   69.49
  -8  -3  -1 2013.10   66.99
  -8  -3  -1 2080.09   73.09
  -8  -3  -1 2046.20   72.89
  -8  -3  -1 1920.51   69.19
  -8  -3  -1 1966.80   68.89
  -8  -3  -1 2115.19   90.79
   8   3   1 2004.90   67.59
   8   3   1 2019.20   75.89
   8   3   1 2083.29   68.89
   8   3   1 1980.10   73.09
   8   3   1 1952.30   80.79
   8   3   1 2031.00  100.79
   8   3   1 2062.29   68.69
   8   3   1 2006.50   74.89
  -8  -4  -1  370.06   41.00
  -8  -4  -1  413.76   38.40
  -8  -4  -1  343.97   57.59
  -8  -4  -1  409.46   44.10
  -8  -4  -1  353.86   42.60
  -8  -4  -1  382.96   28.60
  -8  -4  -1  351.06   37.50
   8   4   1  369.86   36.70
   8   4   1  378.06   36.40
   8   4   1  295.57   46.60
   8   4   1  370.16   49.40
  -8  -5  -1  194.18   32.30
  -8  -5  -1  142.39   31.30
  -8  -5  -1  205.28   33.00
  -8  -5  -1  149.69   38.60
  -8  -5  -1  174.98   30.70
  -8  -5  -1  209.78   30.40
   8   5   1  174.98   35.10
   8   5   1  241.28   40.30
   8   5   1  129.39   26.10
   8   5   1  148.59   39.00
   8   5   1  126.39   25.30
   8   5   1  123.79   31.20
  -7   6  -1   65.39   45.50
  -7   6  -1   36.60   29.90
  -7   6  -1  -14.00   26.00
  -7   6  -1  -49.30   25.20
  -7   6  -1   32.70   24.00
  -7   6  -1   41.60   23.70
  -7   6  -1   76.79   36.60
   7  -6   1  -17.70   25.20
   7  -6   1  -17.50   25.90
   7  -6   1   19.10   26.10
   7  -6   1    6.60   22.10
   7  -6   1    9.30   20.80
   7  -6   1   62.69   26.40
  -7   5  -1   74.69   38.30
  -7   5  -1   86.29   23.20
  -7   5  -1   83.19   26.90
  -7   5  -1   59.59   22.00
  -7   5  -1   13.80   24.30
  -7   5  -1  101.69   32.90
   7  -5   1   45.60   21.30
   7  -5   1   29.70   23.50
   7  -5   1   53.29   24.30
   7  -5   1   67.19   20.60
   7  -5   1   68.59   24.50
   7  -5   1   42.60   25.50
  -7   4  -1  839.52   44.60
  -7   4  -1  769.72   42.30
  -7   4  -1  796.62   52.49
  -7   4  -1  775.82   40.20
  -7   4  -1  795.22   41.10
  -7   4  -1  779.12   51.39
   7  -4   1  833.72   50.09
   7  -4   1  838.12   45.70
   7  -4   1  831.82   40.50
   7  -4   1  771.62   43.00
   7  -4   1  811.62   39.60
   7  -4   1  867.81   45.80
  -7   3  -1  364.36   39.80
  -7   3  -1  294.07   32.50
  -7   3  -1  269.67   28.60
  -7   3  -1  291.67   34.40
  -7   3  -1  309.47   28.60
  -7   3  -1  307.07   28.80
  -7   3  -1  343.87   35.30
   7  -3   1  385.26   36.00
   7  -3   1  334.87   34.40
   7  -3   1  318.87   29.90
   7  -3   1  309.37   32.10
   7  -3   1  332.17   29.90
   7  -3   1  323.47   27.40
  -7   2  -1  855.81   35.80
  -7   2  -1  849.52   42.70
  -7   2  -1  849.12   37.40
  -7   2  -1  868.21   42.70
  -7   2  -1  805.12   36.20
  -7   2  -1  798.92   37.90
  -7   2  -1  850.11   36.10
   7  -2   1  819.02   35.80
   7  -2   1  872.31   36.60
   7  -2   1  845.72   36.50
   7  -2   1  805.62   41.50
   7  -2   1  865.41   36.10
  -7   1  -1  488.55   30.70
  -7   1  -1  505.75   28.70
  -7   1  -1  518.35   35.20
  -7   1  -1  505.75   28.10
  -7   1  -1  460.65   36.00
  -7   1  -1  463.05   26.40
  -7   1  -1  496.65   30.10
   7  -1   1  540.75   29.10
   7  -1   1  504.05   28.80
   7  -1   1  536.65   29.30
   7  -1   1  460.75   33.60
   7  -1   1  484.35   29.30
   7  -1   1  473.75   29.60
  -7   0  -1  409.96   32.70
  -7   0  -1  377.46   30.50
  -7   0  -1  392.46   27.70
  -7   0  -1  403.86   28.10
  -7   0  -1  443.76   34.60
  -7   0  -1  409.06   29.20
  -7   0  -1  411.96   37.80
   7   0   1  440.26   27.60
   7   0   1  450.05   25.60
   7   0   1  419.16   31.50
   7   0   1  362.16   33.60
   7   0   1  383.76   30.60
   7   0   1  441.66   25.60
  -7  -1  -1  518.45   33.20
  -7  -1  -1  490.75   41.00
  -7  -1  -1  497.85   31.10
  -7  -1  -1  493.95   27.70
  -7  -1  -1  458.75   32.80
  -7  -1  -1  478.85   33.10
   7   1   1  456.35   34.90
   7   1   1  534.05   29.90
   7   1   1  476.55   33.70
   7   1   1  433.06   32.90
   7   1   1  496.95   26.80
   7   1   1  485.85   29.40
   7   1   1  440.06   31.80
   7   1   1  524.85   38.20
  -7  -2  -1  763.72   37.00
  -7  -2  -1  866.01   40.70
  -7  -2  -1  771.82   40.00
  -7  -2  -1  843.02   37.00
  -7  -2  -1  690.43   36.70
  -7  -2  -1  758.22   49.70
   7   2   1  771.32   41.60
   7   2   1  833.92   42.60
   7   2   1  888.51   46.40
   7   2   1  774.82   43.00
   7   2   1  760.42   34.60
   7   2   1  782.82   37.10
   7   2   1  725.43   38.90
   7   2   1  871.31   36.70
  -7  -3  -1  330.57   31.80
  -7  -3  -1  365.36   31.70
  -7  -3  -1  300.17   47.60
  -7  -3  -1  311.47   32.30
  -7  -3  -1  328.77   35.90
  -7  -3  -1  326.57   27.30
  -7  -3  -1  336.17   32.70
   7   3   1  338.77   30.40
   7   3   1  328.47   39.70
   7   3   1  349.07   31.40
   7   3   1  305.77   41.40
   7   3   1  283.27   38.90
   7   3   1  308.07   28.10
   7   3   1  289.07   37.30
  -7  -4  -1  789.12   34.30
  -7  -4  -1  829.02   55.19
  -7  -4  -1  733.13   44.20
  -7  -4  -1  737.73   63.39
  -7  -4  -1  761.02   45.60
  -7  -4  -1  827.82   49.30
  -7  -4  -1  782.52   40.50
   7   4   1  706.33   52.39
   7   4   1  867.51   43.60
   7   4   1  821.32   42.90
   7   4   1  776.82   46.80
   7   4   1  760.52   56.79
  -7  -5  -1   85.99   25.50
  -7  -5  -1   37.60   25.70
  -7  -5  -1   50.69   28.70
  -7  -5  -1   68.49   28.20
  -7  -5  -1   70.29   43.30
  -7  -5  -1   55.19   27.20
   7   5   1   48.10   28.50
   7   5   1   50.89   23.30
   7   5   1   37.50   28.20
   7   5   1   46.30   22.20
   7   5   1   53.39   31.90
   7   5   1   39.10   41.80
  -7  -6  -1   47.00   31.70
  -7  -6  -1   19.90   27.40
  -7  -6  -1   12.30   25.00
  -7  -6  -1   52.09   38.50
  -7  -6  -1   45.90   33.80
  -7  -6  -1   32.10   26.40
   7   6   1  -10.70   32.10
   7   6   1   35.00   30.20
   7   6   1   35.70   28.90
   7   6   1    0.80   22.90
   7   6   1   45.70   30.80
  -6   6  -1   29.90   22.90
  -6   6  -1   39.20   28.60
  -6   6  -1  -44.60   23.70
  -6   6  -1  -73.19   29.20
  -6   6  -1   61.69   43.80
  -6   6  -1   47.90   36.10
  -6   6  -1   -1.00   21.70
   6  -6   1    4.30   25.30
   6  -6   1    8.90   32.30
   6  -6   1    5.10   20.00
   6  -6   1    5.80   21.70
   6  -6   1  -15.80   29.70
   6  -6   1  -25.50   23.40
  -6   5  -1  175.68   36.00
  -6   5  -1  199.98   29.10
  -6   5  -1  218.28   38.50
  -6   5  -1  265.67   36.50
  -6   5  -1  254.87   33.10
  -6   5  -1  278.37   31.30
   6  -5   1  243.78   29.70
   6  -5   1  274.97   38.00
   6  -5   1  253.37   29.40
   6  -5   1  232.58   28.60
   6  -5   1  204.18   24.40
   6  -5   1  205.38   33.30
  -6   4  -1  720.53   49.30
  -6   4  -1  757.72   39.90
  -6   4  -1  759.42   39.10
  -6   4  -1  763.42   40.70
  -6   4  -1  730.23   41.20
  -6   4  -1  699.03   49.90
   6  -4   1  763.32   39.30
   6  -4   1  750.92   44.60
   6  -4   1  761.12   42.90
   6  -4   1  747.43   47.00
   6  -4   1  773.82   40.80
   6  -4   1  760.72   37.00
  -6   3  -1  287.07   30.70
  -6   3  -1  271.07   36.30
  -6   3  -1  292.77   25.70
  -6   3  -1  245.58   33.40
  -6   3  -1  292.07   26.10
  -6   3  -1  238.88   35.50
  -6   3  -1  249.68   25.30
   6  -3   1  274.47   32.40
   6  -3   1  295.67   31.10
   6  -3   1  254.07   27.70
   6  -3   1  288.27   24.80
   6  -3   1  357.66   37.90
   6  -3   1  284.67   27.00
  -6   2  -1  915.21   39.10
  -6   2  -1  954.00   36.40
  -6   2  -1  888.11   37.10
  -6   2  -1  914.11   36.50
  -6   2  -1  909.41   42.80
  -6   2  -1  955.90   36.40
  -6   2  -1  906.71   42.90
   6  -2   1  945.61   36.70
   6  -2   1  878.81   41.20
   6  -2   1  855.21   35.50
   6  -2   1  914.01   37.50
   6  -2   1  902.31   36.80
  -6   1  -1  743.43   39.70
  -6   1  -1  725.53   33.70
  -6   1  -1  754.02   33.00
  -6   1  -1  749.42   32.60
  -6   1  -1  741.63   38.80
  -6   1  -1  726.53   31.50
  -6   1  -1  745.63   33.10
   6  -1   1  773.22   38.10
   6  -1   1  708.53   37.40
   6  -1   1  729.73   30.80
   6  -1   1  733.13   32.20
   6  -1   1  747.03   33.40
  -6   0  -1  256.37   24.50
  -6   0  -1  268.07   22.30
  -6   0  -1  270.27   27.80
  -6   0  -1  288.27   31.20
  -6   0  -1  325.37   26.40
  -6   0  -1  297.17   25.40
   6   0   1  262.97   22.90
   6   0   1  280.37   22.40
   6   0   1  287.97   25.30
   6   0   1  245.68   27.10
   6   0   1  253.27   24.30
   6   0   1  235.28   28.30
  -6  -1  -1  775.22   36.80
  -6  -1  -1  717.63   36.80
  -6  -1  -1  736.03   44.70
  -6  -1  -1  711.03   31.80
  -6  -1  -1  708.83   36.70
  -6  -1  -1  743.43   34.60
   6   1   1  748.43   34.20
   6   1   1  689.53   34.50
   6   1   1  774.82   33.70
   6   1   1  716.33   35.20
   6   1   1  776.82   42.30
   6   1   1  688.13   37.50
   6   1   1  736.63   31.10
   6   1   1  727.43   39.20
  -6  -2  -1  966.40   50.29
  -6  -2  -1  884.41   37.20
  -6  -2  -1  877.81   37.80
  -6  -2  -1  844.72   36.10
  -6  -2  -1  838.72   37.80
  -6  -2  -1  886.11   40.90
   6   2   1  843.12   42.10
   6   2   1  838.22   34.50
   6   2   1  876.01   37.30
   6   2   1  909.51   45.80
   6   2   1  845.92   41.20
   6   2   1  824.32   42.70
   6   2   1  807.82   36.30
  -6  -3  -1  232.38   25.10
  -6  -3  -1  272.57   33.40
  -6  -3  -1  282.37   41.90
  -6  -3  -1  251.97   28.60
  -6  -3  -1  226.28   29.30
  -6  -3  -1  271.07   22.90
  -6  -3  -1  232.98   33.60
   6   3   1  238.78   34.50
   6   3   1  254.27   36.00
   6   3   1  271.97   38.60
   6   3   1  258.77   27.20
   6   3   1  252.77   27.30
  -6  -4  -1  773.32   43.80
  -6  -4  -1  730.63   62.59
  -6  -4  -1  802.52   42.50
  -6  -4  -1  748.23   42.90
  -6  -4  -1  713.13   43.00
  -6  -4  -1  753.42   47.30
   6   4   1  764.12   49.00
   6   4   1  776.92   41.00
   6   4   1  813.12   38.60
   6   4   1  851.31   54.69
   6   4   1  798.12   81.69
   6   4   1  834.32   57.49
  -6  -5  -1  264.97   31.90
  -6  -5  -1  240.48   31.80
  -6  -5  -1  243.78   36.30
  -6  -5  -1  243.28   37.50
  -6  -5  -1  251.07   33.60
  -6  -5  -1  250.67   44.70
   6   5   1  238.78   36.60
   6   5   1  277.07   34.60
   6   5   1  314.37   38.40
   6   5   1  210.08   32.10
   6   5   1  230.28   27.10
   6   5   1  188.88   37.30
  -6  -6  -1   21.50   26.70
  -6  -6  -1   41.40   30.30
  -6  -6  -1   61.49   48.50
  -6  -6  -1   13.30   26.10
  -6  -6  -1   26.00   44.80
  -6  -6  -1   12.40   27.90
   6   6   1   21.80   23.00
   6   6   1  -13.80   31.10
   6   6   1   22.90   29.50
   6   6   1  -40.80   33.90
   6   6   1  -26.50   25.50
  -5   6  -1  200.98   40.30
  -5   6  -1  194.88   46.20
  -5   6  -1  167.48   24.90
  -5   6  -1   73.39   39.20
  -5   6  -1  154.38   25.40
   5  -6   1  158.68   22.90
   5  -6   1  196.88   25.60
   5  -6   1  169.48   36.90
   5  -6   1  270.27   38.20
   5  -6   1  180.68   26.70
  -5   5  -1  186.18   25.00
  -5   5  -1   89.09   32.90
  -5   5  -1  145.99   24.20
  -5   5  -1  164.68   23.50
  -5   5  -1  204.58   39.50
  -5   5  -1  136.79   24.30
  -5   5  -1  214.98   34.60
   5  -5   1  151.28   21.40
   5  -5   1  216.08   27.00
   5  -5   1  151.18   26.50
   5  -5   1  181.58   23.20
   5  -5   1  174.88   27.10
   5  -5   1  180.28   32.70
  -5   4  -1 1117.59   47.50
  -5   4  -1 1195.38   60.99
  -5   4  -1 1125.59   44.80
  -5   4  -1 1129.69   57.69
  -5   4  -1 1102.99   59.09
  -5   4  -1 1126.09   57.59
   5  -4   1 1173.68   48.90
   5  -4   1 1371.56   68.19
   5  -4   1 1179.68   44.30
   5  -4   1 1138.69   52.99
   5  -4   1 1195.58   49.99
   5  -4   1  933.21   63.59
  -5   3  -1  171.58   25.10
  -5   3  -1  185.48   22.20
  -5   3  -1  130.99   21.80
  -5   3  -1  175.28   26.70
  -5   3  -1  159.48   26.70
  -5   3  -1  199.88   23.30
  -5   3  -1  173.78   24.00
   5  -3   1  190.48   22.20
   5  -3   1  140.79   18.70
   5  -3   1  186.98   26.70
   5  -3   1  183.18   29.00
   5  -3   1  172.88   20.90
   5  -3   1  180.48   24.00
  -5   1  -1 6083.49  167.78
   5  -1   1 6050.39  167.18
  -5   0  -1 1049.89   42.10
  -5   0  -1 1143.89   37.90
  -5   0  -1 1109.39   37.00
  -5   0  -1 1026.80   39.20
  -5   0  -1 1093.99   37.50
  -5   0  -1 1068.19   37.80
   5   0   1  959.00   37.20
   5   0   1 1068.89   39.40
   5   0   1  957.40   40.60
   5   0   1 1121.69   38.00
   5   0   1 1134.59   36.50
   5   0   1 1046.30   36.70
  -5  -1  -1 6023.70  162.38
   5   1   1 5734.13  164.18
   5   1   1 6052.29  163.08
  -5  -3  -1  162.98   27.40
  -5  -3  -1  164.58   19.10
  -5  -3  -1  179.98   26.50
  -5  -3  -1  133.59   20.10
  -5  -3  -1  110.59   20.50
  -5  -3  -1  118.09   20.60
  -5  -3  -1  129.09   21.60
   5   3   1  184.38   33.90
   5   3   1  144.49   21.00
   5   3   1  149.59   18.30
   5   3   1  142.09   20.80
  -5  -4  -1 1192.98   54.49
  -5  -4  -1 1248.08   50.99
  -5  -4  -1 1161.48   48.90
  -5  -4  -1 1134.79   68.99
  -5  -4  -1 1179.68   39.10
  -5  -4  -1 1132.29   51.39
  -5  -4  -1 1124.29   59.59
   5   4   1 1173.58   54.69
   5   4   1 1244.38   48.90
   5   4   1 1207.78   58.39
   5   4   1 1349.77   83.39
   5   4   1 1214.08   48.80
   5   4   1 1165.28   62.89
  -5  -5  -1  160.78   36.30
  -5  -5  -1  185.58   31.60
  -5  -5  -1  164.68   28.60
  -5  -5  -1  155.98   29.60
  -5  -5  -1  135.49   23.50
  -5  -5  -1  146.79   27.90
   5   5   1  159.48   28.90
   5   5   1  164.68   25.00
   5   5   1  142.39   29.00
   5   5   1  152.38   30.30
   5   5   1  125.19   30.80
   5   5   1  188.68   25.20
  -5  -6  -1  139.49   30.60
  -5  -6  -1  242.58   35.50
  -5  -6  -1  172.48   32.10
  -5  -6  -1  186.98   28.40
   5   6   1  161.38   33.60
   5   6   1  149.59   39.10
   5   6   1  137.09   24.90
   5   6   1  175.08   31.10
   5   6   1  277.97   46.90
  -4   6  -1   28.90   21.40
  -4   6  -1  159.78   49.20
  -4   6  -1   25.30   26.80
  -4   6  -1   47.70   20.80
  -4   6  -1   -0.30   24.40
  -4   6  -1  -12.70   23.00
  -4   6  -1   72.89   36.20
   4  -6   1   12.20   28.10
   4  -6   1   30.60   26.10
   4  -6   1   16.90   25.00
   4  -6   1   18.80   19.80
   4  -6   1   29.40   19.50
   4  -6   1   12.40   20.70
  -4   5  -1  606.04   48.40
  -4   5  -1  627.24   38.90
  -4   5  -1  599.84   37.50
  -4   5  -1  622.14   39.30
  -4   5  -1  618.14   39.70
  -4   5  -1  569.44   61.79
   4  -5   1  607.54   34.60
   4  -5   1  637.04   40.40
   4  -5   1  647.64   42.50
   4  -5   1  596.34   35.80
   4  -5   1  625.04   37.20
   4  -5   1  530.85   46.70
  -4   4  -1  628.54   44.10
  -4   4  -1  583.24   33.30
  -4   4  -1  612.54   33.20
  -4   4  -1  540.75   37.50
  -4   4  -1  654.53   36.00
   4  -4   1  610.14   33.20
   4  -4   1  573.34   34.60
   4  -4   1  565.24   36.70
   4  -4   1  528.65   36.60
   4  -4   1  552.84   30.60
  -4   3  -1  675.73   31.50
  -4   3  -1  569.54   38.60
  -4   3  -1  651.93   31.50
  -4   3  -1  681.73   30.20
  -4   3  -1  707.73   32.80
  -4   3  -1  704.43   38.70
  -4   3  -1  643.04   29.40
   4  -3   1  649.43   31.70
   4  -3   1  668.03   33.40
   4  -3   1  667.53   29.00
   4  -3   1  664.53   30.40
   4  -3   1  675.73   33.10
  -4   2  -1 2817.72   79.19
  -4   2  -1 2759.12   79.99
  -4   2  -1 2733.93   84.89
  -4   2  -1 2685.03   83.09
  -4   2  -1 2666.73   79.09
  -4   2  -1 2671.13   78.99
  -4   2  -1 2794.12   83.19
   4  -2   1 2803.02   78.89
   4  -2   1 2918.41   80.29
   4  -2   1 2772.12   82.59
   4  -2   1 2822.42   79.09
   4  -2   1 2761.82   83.79
   4  -2   1 2777.02   80.49
  -4   0  -1 2335.67   68.09
  -4   0  -1 2343.97   71.29
  -4   0  -1 2545.05   68.89
  -4   0  -1 2430.56   74.49
  -4   0  -1 2646.54   73.59
  -4   0  -1 2439.86   67.39
  -4   0  -1 2471.95   67.89
   4   0   1 2248.77   67.99
   4   0   1 2302.27   68.59
   4   0   1 2423.46   68.99
   4   0   1 2300.27   67.89
   4   0   1 2217.98   70.09
  -4  -2  -1 2740.03   89.99
  -4  -2  -1 2780.22   81.29
  -4  -2  -1 2865.81   80.69
  -4  -2  -1 2792.52   83.89
  -4  -2  -1 2878.01   83.89
  -4  -2  -1 2706.03   80.79
  -4  -2  -1 2893.91   79.49
   4   2   1 2820.22   84.19
   4   2   1 2617.34   80.09
   4   2   1 2591.74   79.39
   4   2   1 2616.14   82.29
   4   2   1 3019.40   89.19
   4   2   1 2657.33   85.19
   4   2   1 2778.42   79.69
  -4  -3  -1  686.63   45.60
  -4  -3  -1  665.13   36.90
  -4  -3  -1  615.94   32.60
  -4  -3  -1  659.63   26.60
  -4  -3  -1  627.04   31.70
  -4  -3  -1  636.14   37.20
  -4  -3  -1  656.83   34.00
   4   3   1  630.24   31.30
   4   3   1  670.03   37.10
   4   3   1  669.43   39.00
   4   3   1  597.24   29.20
   4   3   1  752.02   44.10
  -4  -4  -1  532.75   23.20
  -4  -4  -1  581.04   37.30
  -4  -4  -1  561.74   55.59
  -4  -4  -1  520.95   39.70
  -4  -4  -1  560.04   37.50
  -4  -4  -1  614.24   40.80
  -4  -4  -1  529.35   42.40
   4   4   1  536.15   35.20
   4   4   1  550.14   40.30
   4   4   1  585.24   44.30
   4   4   1  561.04   48.10
   4   4   1  561.94   33.30
   4   4   1  524.15   40.80
  -4  -5  -1  623.34   45.80
  -4  -5  -1  653.03   62.99
  -4  -5  -1  570.04   40.90
  -4  -5  -1  576.14   39.40
  -4  -5  -1  602.34   44.90
  -4  -5  -1  594.84   44.80
   4   5   1  626.14   40.80
   4   5   1  671.23   46.10
   4   5   1  652.13   56.89
   4   5   1  649.93   40.40
   4   5   1  601.84   46.60
   4   5   1  589.84   58.49
  -4  -6  -1   55.09   27.30
  -4  -6  -1   70.99   28.50
  -4  -6  -1   38.00   23.90
  -4  -6  -1   47.20   51.09
  -4  -6  -1   24.80   27.50
   4   6   1   13.10   21.80
   4   6   1   28.20   21.60
   4   6   1   28.00   27.20
   4   6   1   36.00   28.30
   4   6   1   45.20   29.40
   4   6   1   42.70   31.50
  -3   6  -1   43.70   30.50
  -3   6  -1   -9.00   24.50
  -3   6  -1  -15.20   22.50
  -3   6  -1   16.60   25.80
  -3   6  -1   12.20   20.00
  -3   6  -1   50.19   20.90
   3  -6   1   44.10   21.40
   3  -6   1   20.00   29.70
   3  -6   1   38.00   19.90
   3  -6   1   32.20   17.90
   3  -6   1   26.10   24.80
  -3   5  -1 1076.49   36.50
  -3   5  -1 1130.69   49.30
  -3   5  -1 1170.58   73.19
  -3   5  -1 1128.29   46.60
  -3   5  -1 1129.99   50.39
  -3   5  -1 1177.18   58.89
  -3   5  -1 1138.49   50.29
   3  -5   1 1235.08   53.79
   3  -5   1 1214.68   57.99
   3  -5   1 1223.78   49.00
   3  -5   1 1199.68   46.20
   3  -5   1 1191.38   51.79
   3  -5   1 1148.39   45.20
  -3   4  -1 2248.68   92.39
  -3   4  -1 2453.05   73.59
  -3   4  -1 2349.67   74.19
  -3   4  -1 2534.05   81.69
  -3   4  -1 2369.86   74.69
  -3   4  -1 2369.46   73.29
   3  -4   1 2338.87   76.39
   3  -4   1 2356.96   76.69
   3  -4   1 2321.57   71.89
   3  -4   1 2362.76   72.79
   3  -4   1 2448.35   73.19
  -3   3  -1  782.52   33.30
  -3   3  -1  703.93   31.10
  -3   3  -1  677.83   31.30
  -3   3  -1  747.23   30.40
  -3   3  -1  761.92   39.70
   3  -3   1  820.42   30.30
   3  -3   1  751.32   34.20
   3  -3   1  775.22   32.90
   3  -3   1  768.42   37.70
   3  -3   1  770.72   34.20
   3  -3   1  750.52   31.80
  -3   2  -1  353.76   21.40
  -3   2  -1  365.06   23.20
  -3   2  -1  302.57   23.40
  -3   2  -1  320.57   20.60
  -3   2  -1  289.37   30.20
  -3   2  -1  374.76   38.30
   3  -2   1  339.77   22.10
   3  -2   1  324.17   24.60
   3  -2   1  347.67   25.00
   3  -2   1  309.27   19.80
   3  -2   1  317.97   22.50
   3  -2   1  327.37   28.60
  -3   1  -1 1823.62   55.59
  -3   1  -1 1815.62   53.19
  -3   1  -1 1774.62   52.39
  -3   1  -1 1827.82   51.99
  -3   1  -1 1853.81   55.29
  -3   1  -1 1665.53   59.39
   3  -1   1 1917.41   52.29
   3  -1   1 1829.42   52.09
   3  -1   1 1810.82   51.99
   3  -1   1 1809.52   51.89
   3  -1   1 1803.92   54.89
  -3   0  -1   44.00   12.00
  -3   0  -1   33.60   11.20
  -3   0  -1   41.70    9.40
   3   0   1   29.70   13.30
   3   0   1   44.10   10.60
   3   0   1   22.50    9.60
   3   0   1   44.50   10.40
  -3  -1  -1 1798.52   53.39
  -3  -1  -1 1865.71   55.19
  -3  -1  -1 1769.92   53.89
  -3  -1  -1 1737.63   52.29
  -3  -1  -1 2006.40   64.39
  -3  -1  -1 1812.62   52.69
   3   1   1 1731.43   52.89
   3   1   1 1729.33   54.79
   3   1   1 1828.92   54.89
   3   1   1 1760.12   53.29
   3   1   1 1773.92   59.19
   3   1   1 1729.43   51.99
   3   1   1 1923.71   57.99
  -3  -2  -1  305.57   33.60
  -3  -2  -1  306.47   21.00
  -3  -2  -1  281.17   29.90
  -3  -2  -1  314.47   29.40
  -3  -2  -1  306.77   43.80
  -3  -2  -1  314.27   25.00
  -3  -2  -1  354.46   20.30
   3   2   1  299.07   21.60
   3   2   1  295.27   30.00
   3   2   1  312.47   21.00
   3   2   1  351.56   33.50
   3   2   1  242.48   28.80
  -3  -3  -1  730.63   35.10
  -3  -3  -1  711.43   37.60
  -3  -3  -1  719.13   34.70
  -3  -3  -1  733.03   39.00
  -3  -3  -1  765.82   27.10
  -3  -3  -1  738.23   47.20
  -3  -3  -1  710.83   32.50
   3   3   1  732.63   35.20
   3   3   1  759.72   43.80
   3   3   1  759.92   32.80
   3   3   1  772.62   39.50
   3   3   1  741.13   39.70
   3   3   1  745.03   33.50
  -3  -4  -1 2300.47   73.59
  -3  -4  -1 2315.57   78.39
  -3  -4  -1 2473.25   77.39
  -3  -4  -1 2392.96   92.39
  -3  -4  -1 2339.47   79.29
  -3  -4  -1 2405.36   77.89
  -3  -4  -1 2351.66   66.79
   3   4   1 2476.85   81.29
   3   4   1 2293.57   79.39
   3   4   1 2506.25   89.69
   3   4   1 2446.66   73.79
   3   4   1 2418.36   75.69
   3   4   1 2382.66   77.99
  -3  -5  -1 1175.28   54.29
  -3  -5  -1 1130.49   57.49
  -3  -5  -1 1154.18   55.59
  -3  -5  -1 1103.59   54.79
  -3  -5  -1 1037.30   68.49
   3   5   1 1134.49   56.29
   3   5   1 1131.39   51.89
   3   5   1 1211.68   68.29
   3   5   1 1197.88   56.19
   3   5   1 1221.98   50.09
   3   5   1 1229.68   50.69
  -3  -6  -1   32.20   27.30
  -3  -6  -1    1.00   23.00
  -3  -6  -1   47.10   27.90
  -3  -6  -1   57.09   37.60
  -3  -6  -1   46.40   26.50
   3   6   1    5.60   28.50
   3   6   1    6.00   22.40
   3   6   1   16.80   26.60
   3   6   1   29.60   26.50
   3   6   1   13.20   25.70
   3   6   1    2.50   21.80
  -2   6  -1  214.48   31.20
  -2   6  -1  168.38   23.40
  -2   6  -1  187.88   36.80
  -2   6  -1  144.79   28.50
  -2   6  -1  190.48   22.90
  -2   6  -1  201.18   28.10
  -2   6  -1  279.87   36.50
   2  -6   1  125.09   25.30
   2  -6   1  218.48   26.60
   2  -6   1  195.98   26.20
   2  -6   1  186.48   24.20
  -2   5  -1   96.49   23.90
  -2   5  -1   95.39   17.80
  -2   5  -1   92.19   19.60
  -2   5  -1  105.19   30.30
  -2   5  -1   73.79   22.50
  -2   5  -1  130.19   28.70
  -2   5  -1   88.09   20.70
   2  -5   1  109.99   25.20
   2  -5   1  119.79   19.90
   2  -5   1  131.39   18.20
   2  -5   1  110.79   33.60
   2  -5   1  124.49   24.90
   2  -5   1  108.69   27.70
  -2   4  -1 1374.96   56.09
  -2   4  -1 1288.17   43.60
  -2   4  -1 1391.06   49.50
  -2   4  -1 1402.56   51.29
  -2   4  -1 1411.76   48.30
  -2   4  -1 1339.17   49.20
  -2   4  -1 1371.56   68.49
   2  -4   1 1336.67   50.89
   2  -4   1 1425.26   46.40
   2  -4   1 1379.36   52.99
   2  -4   1 1372.86   48.80
   2  -4   1 1417.86   56.69
   2  -4   1 1388.16   47.10
  -2   3  -1 3205.58   94.09
  -2   3  -1 3328.77   94.79
  -2   3  -1 3310.97   93.69
  -2   3  -1 3322.97   98.99
  -2   3  -1 3223.58   89.59
  -2   3  -1 3207.68   93.19
   2  -3   1 3301.27   95.49
   2  -3   1 3268.07   96.69
   2  -3   1 3270.37   93.19
   2  -3   1 3418.26   98.89
   2  -3   1 3382.36   95.69
   2  -3   1 3489.55   96.59
  -2   2  -1 1590.74   49.20
  -2   2  -1 1601.54   48.70
  -2   2  -1 1622.74   53.79
  -2   2  -1 1536.25   48.80
  -2   2  -1 1711.93   49.60
  -2   2  -1 1658.73   47.90
   2  -2   1 1741.83   49.70
   2  -2   1 1588.54   52.79
   2  -2   1 1518.05   49.70
   2  -2   1 1538.65   47.80
   2  -2   1 1634.44   49.50
   2  -1   1 3062.19   84.49
   2  -1   1 2995.60   83.79
  -2  -1  -1 2882.21   81.99
  -2  -1  -1 2880.11   80.99
  -2  -1  -1 2868.31   79.29
  -2  -1  -1 2896.71   80.89
   2   1   1 2777.12   80.19
   2   1   1 2962.80   81.09
   2   1   1 2887.11   81.69
   2   1   1 2898.51   79.39
  -2  -2  -1 1494.45   47.80
  -2  -2  -1 1553.64   50.59
  -2  -2  -1 1556.04   57.99
  -2  -2  -1 1549.54   46.50
  -2  -2  -1 1519.25   52.39
  -2  -2  -1 1563.64   49.40
  -2  -2  -1 1509.75   50.59
   2   2   1 1597.44   53.19
   2   2   1 1636.64   49.40
   2   2   1 1531.25   47.80
   2   2   1 1611.94   51.39
   2   2   1 1787.22   58.09
  -2  -3  -1 3285.27   90.59
  -2  -3  -1 3144.89   97.59
  -2  -3  -1 3334.27   95.29
  -2  -3  -1 3152.28   97.09
  -2  -3  -1 3365.56  106.99
  -2  -3  -1 3247.07   94.59
  -2  -3  -1 3249.87   97.99
   2   3   1 3343.37   96.79
   2   3   1 3448.25   98.79
   2   3   1 3318.67  105.09
   2   3   1 3366.26   94.69
   2   3   1 3262.47   97.89
   2   3   1 3304.57   97.89
   2   3   1 3489.75   95.19
  -2  -4  -1 1341.57   41.80
  -2  -4  -1 1316.87   54.29
  -2  -4  -1 1410.36   50.49
  -2  -4  -1 1406.06   55.49
  -2  -4  -1 1345.77   54.69
  -2  -4  -1 1410.36   68.79
  -2  -4  -1 1417.76   51.69
   2   4   1 1457.95   51.39
   2   4   1 1408.66   49.80
   2   4   1 1343.57   53.69
   2   4   1 1442.06   55.79
   2   4   1 1372.56   64.29
   2   4   1 1390.16   54.79
   2   4   1 1412.56   55.29
  -2  -5  -1  121.39   24.00
  -2  -5  -1  128.29   27.90
  -2  -5  -1   88.49   25.50
  -2  -5  -1   87.19   22.40
  -2  -5  -1  127.59   25.40
   2   5   1  104.99   19.60
   2   5   1  129.49   26.50
   2   5   1   74.69   25.10
   2   5   1   66.19   24.70
   2   5   1  113.59   26.20
   2   5   1  108.69   25.60
   2   5   1   85.49   20.70
  -2  -6  -1  183.28   29.20
  -2  -6  -1  241.48   32.90
  -2  -6  -1  206.88   32.30
  -2  -6  -1  174.78   47.70
   2   6   1  225.58   33.20
   2   6   1  170.18   30.50
   2   6   1  199.68   31.90
   2   6   1  205.08   48.80
   2   6   1  150.48   32.90
   2   6   1  270.47   34.30
   2   6   1  229.98   28.10
  -1   6  -1   89.49   26.70
  -1   6  -1   60.09   26.70
  -1   6  -1  121.59   36.40
  -1   6  -1   71.69   20.30
  -1   6  -1   76.49   20.70
  -1   6  -1   63.29   20.30
  -1   6  -1   44.90   24.20
   1  -6   1   96.89   32.20
   1  -6   1   93.09   23.70
   1  -6   1  140.19   27.40
   1  -6   1   85.09   21.50
  -1   5  -1  569.54   35.60
  -1   5  -1  515.25   33.00
  -1   5  -1  589.74   59.29
  -1   5  -1  574.74   35.30
  -1   5  -1  527.55   39.30
  -1   5  -1  587.04   40.80
  -1   5  -1  617.74   44.40
   1  -5   1  567.64   41.70
   1  -5   1  620.14   55.39
   1  -5   1  585.54   45.30
   1  -5   1  624.14   35.60
   1  -5   1  616.44   27.30
  -1   4  -1  258.27   23.40
  -1   4  -1  285.07   26.10
  -1   4  -1  259.47   23.20
  -1   4  -1  284.97   26.70
  -1   4  -1  279.87   29.70
  -1   4  -1  271.07   43.80
  -1   4  -1  299.77   32.50
   1  -4   1  275.07   19.80
   1  -4   1  255.57   28.00
   1  -4   1  231.48   22.30
   1  -4   1  300.97   25.70
   1  -4   1  269.37   32.70
   1  -4   1  233.68   26.40
  -1   3  -1 4221.08  112.09
  -1   3  -1 4072.59  112.99
  -1   3  -1 4116.09  115.09
  -1   3  -1 4077.09  113.69
  -1   3  -1 4115.99  118.29
  -1   3  -1 4060.99  114.59
  -1   3  -1 4071.19  127.09
   1  -3   1 4137.29  115.29
   1  -3   1 3976.10  113.19
   1  -3   1 4042.90  115.19
   1  -3   1 4197.38  111.89
   1  -3   1 4134.69  118.19
  -1   2  -1 2552.84   79.69
  -1   2  -1 2772.92   80.09
  -1   2  -1 2765.32   78.99
  -1   2  -1 2769.22   79.19
  -1   2  -1 2897.01   77.69
  -1   2  -1 2905.51   83.29
  -1   2  -1 2963.20   78.89
   1  -2   1 2905.21   82.69
   1  -2   1 2973.20   80.39
   1  -2   1 2955.70   80.69
   1  -2   1 2936.21   78.99
   1  -2   1 2995.80   79.19
  -1   0  -1  462.25   14.00
  -1   0  -1  447.96   14.10
   1   0   1  420.46   16.00
   1   0   1  444.06   15.60
   1   0   1  448.16   14.40
   1   0   1  442.56   15.10
   1   0   1  450.35   14.80
  -1  -2  -1 2746.53   88.99
  -1  -2  -1 2734.73   81.39
  -1  -2  -1 2741.83   82.99
  -1  -2  -1 2981.60   83.89
  -1  -2  -1 2839.62   80.69
   1   2   1 3092.79   88.99
   1   2   1 2915.71   83.69
   1   2   1 3009.10   83.29
   1   2   1 2925.51   87.09
   1   2   1 2919.61   81.49
   1   2   1 2958.60   82.99
   1   2   1 2931.11   81.29
  -1  -3  -1 4003.70  118.79
  -1  -3  -1 3943.41  127.09
  -1  -3  -1 4025.70  115.69
   1   3   1 4127.89  118.19
   1   3   1 4348.96  126.99
   1   3   1 4194.18  118.79
   1   3   1 4269.57  115.99
   1   3   1 4206.38  118.69
   1   3   1 4252.87  118.49
  -1  -4  -1  239.38   34.70
  -1  -4  -1  280.07   26.40
  -1  -4  -1  253.07   28.60
  -1  -4  -1  231.68   31.00
  -1  -4  -1  234.68   17.10
   1   4   1  236.98   26.60
   1   4   1  284.17   26.00
   1   4   1  268.67   40.60
   1   4   1  252.47   30.70
   1   4   1  306.97   31.50
   1   4   1  291.97   32.50
   1   4   1  250.97   31.70
  -1  -5  -1  566.64   44.60
  -1  -5  -1  571.34   23.70
  -1  -5  -1  566.04   43.30
  -1  -5  -1  626.04   37.20
  -1  -5  -1  638.34   42.30
  -1  -5  -1  580.14   42.90
  -1  -5  -1  548.45   22.50
   1   5   1  663.23   44.00
   1   5   1  588.64   36.30
   1   5   1  579.64   41.20
   1   5   1  598.14   41.40
   1   5   1  579.44   43.10
   1   5   1  612.04   37.60
   1   5   1  621.34   55.89
  -1  -6  -1  129.79   29.80
  -1  -6  -1  122.69   44.40
  -1  -6  -1   83.79   25.10
  -1  -6  -1   49.20   27.60
  -1  -6  -1  127.39   29.20
   1   6   1   54.29   25.60
   1   6   1   73.19   22.80
   1   6   1  101.39   29.00
   1   6   1   58.59   27.90
   1   6   1   62.39   26.20
   1   6   1  100.49   23.70
   1   6   1   84.49   28.90
   0   6  -1  168.78   27.60
   0   6  -1  213.78   29.10
   0   6  -1  199.18   31.60
   0   6  -1  220.68   32.60
   0   6  -1  193.18   31.10
   0   6  -1  219.48   39.00
   0   6  -1  190.78   29.30
   0  -6   1  222.98   25.30
   0  -6   1  294.17   41.00
   0  -6   1  281.27   35.70
   0  -6   1  186.08   26.30
   0   5  -1  561.24   35.90
   0   5  -1  635.04   58.69
   0   5  -1  594.34   41.60
   0   5  -1  572.24   34.70
   0   5  -1  646.64   44.30
   0   5  -1  632.54   35.40
   0   5  -1  605.44   40.40
   0  -5   1  715.13   43.80
   0  -5   1  569.34   43.50
   0  -5   1  580.34   35.90
   0  -5   1  621.44   42.60
   0   4  -1  624.04   35.60
   0   4  -1  615.74   33.00
   0   4  -1  622.54   29.50
   0   4  -1  652.53   31.90
   0   4  -1  641.34   50.39
   0   4  -1  572.44   32.10
   0   4  -1  638.54   38.30
   0  -4   1  619.84   29.70
   0  -4   1  623.74   34.60
   0  -4   1  603.34   23.30
   0  -4   1  644.14   32.60
   0  -4   1  676.23   38.10
   0   3  -1 1473.25   48.50
   0   3  -1 1487.55   49.90
   0   3  -1 1586.54   54.29
   0   3  -1 1598.14   56.29
   0   3  -1 1479.25   50.99
   0   3  -1 1512.65   47.60
   0  -3   1 1539.15   51.49
   0  -3   1 1463.15   48.80
   0  -3   1 1531.35   53.29
   0  -3   1 1534.75   44.30
   0  -3   1 1584.14   51.19
   0   2  -1  637.34   26.30
   0   2  -1  680.63   27.00
   0   2  -1  641.84   24.90
   0   2  -1  680.13   24.50
   0   2  -1  669.83   25.40
   0   2  -1  674.93   37.40
   0   2  -1  657.73   33.70
   0  -2   1  599.04   24.70
   0  -2   1  691.73   27.60
   0  -2   1  720.43   29.10
   0  -2   1  675.03   28.20
   0  -2   1  657.23   21.70
   0  -2  -1  631.14   30.00
   0  -2  -1  650.13   25.00
   0  -2  -1  655.93   28.80
   0  -2  -1  647.94   29.30
   0  -2  -1  636.74   30.80
   0  -2  -1  653.53   27.10
   0   2   1  661.53   27.00
   0   2   1  679.13   27.50
   0   2   1  682.03   29.60
   0   2   1  690.03   29.80
   0   2   1  708.23   26.50
   0   2   1  708.23   36.10
   0   2   1  629.94   28.60
   0  -3  -1 1543.65   54.89
   0  -3  -1 1502.45   54.69
   0  -3  -1 1466.95   54.49
   0  -3  -1 1619.64   50.79
   0  -3  -1 1529.05   54.29
   0   3   1 1617.24   63.49
   0   3   1 1532.45   54.79
   0   3   1 1498.15   52.19
   0   3   1 1722.63   53.99
   0   3   1 1535.65   50.19
   0   3   1 1574.74   50.79
   0   3   1 1482.65   53.29
   0  -4  -1  630.44   37.70
   0  -4  -1  641.74   32.20
   0  -4  -1  592.14   25.40
   0  -4  -1  606.04   37.80
   0  -4  -1  601.74   35.20
   0   4   1  613.34   36.70
   0   4   1  601.74   33.00
   0   4   1  627.94   35.10
   0   4   1  624.14   38.20
   0   4   1  658.33   32.20
   0   4   1  658.83   48.40
   0   4   1  566.64   32.30
   0  -5  -1  550.74   43.70
   0  -5  -1  564.44   39.20
   0  -5  -1  590.04   25.70
   0  -5  -1  628.24   37.80
   0   5   1  586.04   41.30
   0   5   1  600.34   37.10
   0   5   1  571.14   42.00
   0   5   1  610.34   57.89
   0   5   1  618.64   36.40
   0   5   1  608.54   39.60
   0   5   1  644.64   45.20
   0  -6  -1  192.58   26.00
   0  -6  -1  293.37   40.50
   0  -6  -1  232.98   29.30
   0  -6  -1  193.28   34.10
   0  -6  -1  272.97   38.80
   0   6   1  131.39   30.80
   0   6   1  242.68   35.70
   0   6   1  165.48   28.30
   0   6   1  240.18   28.70
   0   6   1  196.38   31.30
   0   6   1  170.58   30.20
   0   6   1  163.98   23.90
   1   6  -1  206.28   38.80
   1   6  -1  188.68   24.50
   1   6  -1  189.68   27.10
   1   6  -1  176.58   29.30
   1   6  -1  181.68   23.60
   1   6  -1  182.88   28.40
   1   6  -1  230.18   32.80
  -1  -6   1  258.67   38.20
  -1  -6   1  170.88   24.30
  -1  -6   1  265.47   38.40
  -1  -6   1  133.39   27.90
  -1  -6   1  210.58   26.50
   1   5  -1 1464.85   52.39
   1   5  -1 1467.55   58.99
   1   5  -1 1491.85   54.19
   1   5  -1 1419.36   55.99
   1   5  -1 1481.65   75.79
   1   5  -1 1320.87   83.69
   1   5  -1 1379.06   57.69
  -1  -5   1 1437.16   54.09
  -1  -5   1 1451.65   57.79
  -1  -5   1 1443.26   59.59
  -1  -5   1 1506.85   55.69
  -1  -5   1 1456.45   68.89
   1   4  -1 1671.13   55.39
   1   4  -1 1691.43   60.39
   1   4  -1 1742.33   58.39
   1   4  -1 1638.34   57.79
   1   4  -1 1713.63   59.69
   1   4  -1 1744.03   55.59
   1   4  -1 1714.63   73.29
  -1  -4   1 1691.73   54.99
  -1  -4   1 1731.93   61.49
  -1  -4   1 1718.63   60.09
  -1  -4   1 1743.33   56.99
   1   3  -1 3082.09  100.29
   1   3  -1 3054.99   88.79
   1   3  -1 3078.49   86.39
   1   3  -1 3007.60   88.59
   1   3  -1 3110.59   86.99
   1   3  -1 3053.49   89.39
   1   3  -1 3051.89   90.19
  -1  -3   1 3106.59   90.89
  -1  -3   1 3096.19   87.19
  -1  -3   1 2987.90   86.59
   1   2  -1 3231.08   88.69
   1   2  -1 3081.29   86.79
   1   2  -1 3325.87   88.69
   1   2  -1 3171.18   90.09
   1   2  -1 3209.38   86.59
   1   2  -1 3180.38   95.89
   1   2  -1 3150.48   88.69
  -1  -2   1 3136.79   96.59
  -1  -2   1 3069.29   86.89
  -1  -2   1 3142.59   93.09
   1  -2  -1 3207.38   88.99
   1  -2  -1 3081.59   86.89
   1  -2  -1 3194.58   86.89
   1  -2  -1 3160.18   86.79
   1  -2  -1 3213.58   89.69
   1  -2  -1 3105.39   88.79
  -1   2   1 3013.00   86.59
  -1   2   1 3174.78   89.79
  -1   2   1 3119.49   87.09
  -1   2   1 3094.39   94.59
  -1   2   1 3113.59   88.19
  -1   2   1 3005.70   86.69
  -1   2   1 3163.98   88.39
   1  -3  -1 3146.09   89.89
   1  -3  -1 3049.29   84.69
   1  -3  -1 3131.39   87.99
   1  -3  -1 2769.72   85.39
   1  -3  -1 2991.50   90.59
   1  -3  -1 3142.29   88.99
   1  -3  -1 3050.79   90.39
  -1   3   1 2998.20   86.59
  -1   3   1 2903.61   87.79
  -1   3   1 3024.90   87.29
  -1   3   1 3057.99   90.69
  -1   3   1 3092.89   98.99
  -1   3   1 2979.10   85.79
  -1   3   1 2789.92   88.39
   1  -4  -1 1688.03   56.99
   1  -4  -1 1845.52   62.09
   1  -4  -1 1719.33   62.89
   1  -4  -1 1721.03   57.89
   1  -4  -1 1731.83   62.09
   1  -4  -1 1780.72   55.19
  -1   4   1 1642.34   56.49
  -1   4   1 1723.33   57.59
  -1   4   1 1703.63   58.09
  -1   4   1 1809.12   73.59
  -1   4   1 1586.54   59.49
  -1   4   1 1647.04   60.99
  -1   4   1 1751.22   63.19
   1  -5  -1 1418.76   59.99
   1  -5  -1 1387.46   46.90
   1  -5  -1 1441.86   55.99
   1  -5  -1 1405.06   61.99
   1  -5  -1 1520.45   54.89
  -1   5   1 1460.65   54.49
  -1   5   1 1400.46   55.49
  -1   5   1 1443.66   75.39
  -1   5   1 1397.86   60.29
  -1   5   1 1430.46   62.79
  -1   5   1 1373.36   58.09
  -1   5   1 1432.36   53.69
   1  -6  -1  270.97   40.10
   1  -6  -1  218.88   27.10
   1  -6  -1  211.58   28.70
   1  -6  -1  189.38   25.40
  -1   6   1  173.88   24.50
  -1   6   1  111.99   31.70
  -1   6   1  188.98   26.70
  -1   6   1  183.38   29.80
  -1   6   1  136.69   28.90
  -1   6   1  126.39   28.60
  -1   6   1  173.28   24.50
   2   6  -1   58.09   26.40
   2   6  -1   52.89   24.70
   2   6  -1   70.99   25.40
   2   6  -1   39.60   20.20
   2   6  -1   58.89   26.10
   2   6  -1   83.09   32.90
   2   6  -1   67.99   21.20
  -2  -6   1  100.49   26.80
  -2  -6   1  101.49   26.60
  -2  -6   1   81.39   28.90
  -2  -6   1   94.39   23.80
  -2  -6   1   98.49   22.80
   2   5  -1 1750.72   59.79
   2   5  -1 1791.52   61.79
   2   5  -1 1761.12   65.29
   2   5  -1 1717.73   78.79
   2   5  -1 1784.12   66.39
   2   5  -1 1769.62   65.69
   2   5  -1 1708.63   81.19
  -2  -5   1 1845.92   61.89
  -2  -5   1 1833.42   67.39
  -2  -5   1 1726.03   63.09
  -2  -5   1 1694.63   64.59
  -2  -5   1 1588.14   82.99
   2   4  -1 1149.39   47.70
   2   4  -1 1128.59   43.30
   2   4  -1 1145.69   41.90
   2   4  -1 1188.28   60.19
   2   4  -1 1085.69   45.60
   2   4  -1 1220.78   47.50
   2   4  -1 1115.59   46.70
  -2  -4   1 1140.39   43.50
  -2  -4   1 1108.19   48.60
  -2  -4   1 1146.89   47.90
  -2  -4   1 1112.09   42.10
  -2  -4   1 1261.57   46.90
   2   3  -1 1434.66   49.50
   2   3  -1 1470.75   49.10
   2   3  -1 1382.46   50.09
   2   3  -1 1409.36   46.60
   2   3  -1 1436.96   50.39
   2   3  -1 1416.56   45.30
   2   3  -1 1377.26   59.69
  -2  -3   1 1427.86   50.49
  -2  -3   1 1457.95   48.90
  -2  -3   1 1455.85   45.80
  -2  -3   1 1423.16   50.09
  -2  -3   1 1348.07   62.39
  -2  -3   1 1377.06   47.20
   2   2  -1 1157.98   39.60
   2   2  -1 1173.38   35.70
   2   2  -1 1129.09   47.00
   2   2  -1 1145.39   38.30
   2   2  -1 1104.19   36.60
  -2  -2   1 1150.48   36.20
  -2  -2   1 1092.49   39.70
  -2  -2   1 1134.29   47.60
  -2  -2   1 1078.19   48.00
  -2  -2   1 1147.79   35.90
  -2  -2   1 1091.19   38.30
   2  -1  -1 2917.31   81.99
   2  -1  -1 3070.09   82.09
  -2   1   1 3066.99   83.09
  -2   1   1 2877.31   81.59
  -2   1   1 3026.10   81.69
   2  -2  -1 1106.69   40.50
   2  -2  -1 1135.19   39.40
   2  -2  -1 1139.29   37.40
   2  -2  -1 1085.39   36.70
   2  -2  -1 1125.99   37.10
   2  -2  -1 1145.19   39.80
   2  -2  -1 1142.79   35.60
  -2   2   1 1085.89   38.50
  -2   2   1 1086.39   37.00
  -2   2   1 1117.79   37.80
  -2   2   1 1096.29   41.50
  -2   2   1 1070.19   35.20
  -2   2   1 1032.10   38.60
   2  -3  -1 1322.17   46.10
   2  -3  -1 1282.07   50.49
   2  -3  -1 1439.06   51.79
   2  -3  -1 1362.96   48.30
   2  -3  -1 1469.15   45.30
   2  -3  -1 1439.36   45.70
   2  -3  -1 1344.27   49.90
  -2   3   1 1348.07   48.10
  -2   3   1 1404.46   61.09
  -2   3   1 1485.25   45.60
  -2   3   1 1439.96   49.10
  -2   3   1 1354.76   46.60
  -2   3   1 1386.26   49.20
  -2   3   1 1391.96   52.39
   2  -4  -1 1174.48   41.10
   2  -4  -1 1132.79   49.80
   2  -4  -1 1164.28   48.60
   2  -4  -1 1065.79   41.30
   2  -4  -1 1184.68   48.00
   2  -4  -1 1085.69   45.20
  -2   4   1 1013.40   45.80
  -2   4   1 1158.58   45.60
  -2   4   1 1066.99   46.80
  -2   4   1 1099.19   60.09
  -2   4   1 1151.08   42.20
  -2   4   1 1185.58   50.69
  -2   4   1 1193.78   42.10
   2  -5  -1 1809.92   69.89
   2  -5  -1 1782.22   68.39
   2  -5  -1 1817.62   64.09
   2  -5  -1 1777.62   70.79
   2  -5  -1 1889.71   63.19
   2  -5  -1 1780.92   57.89
  -2   5   1 1771.52   83.89
  -2   5   1 1751.02   66.09
  -2   5   1 1738.83   63.09
  -2   5   1 1800.42   70.99
  -2   5   1 1856.31   68.69
  -2   5   1 1755.52   62.39
  -2   5   1 1671.73   60.29
   2  -6  -1   58.49   29.70
   2  -6  -1   45.40   22.40
   2  -6  -1   92.19   25.20
   2  -6  -1   59.49   17.10
  -2   6   1   49.60   25.30
  -2   6   1  100.29   22.60
  -2   6   1   78.89   27.60
  -2   6   1   62.19   21.70
  -2   6   1   78.59   20.90
  -2   6   1   66.99   31.10
  -2   6   1   81.79   29.50
   3   6  -1   75.19   25.20
   3   6  -1   70.69   21.70
   3   6  -1   81.89   25.60
   3   6  -1  105.59   27.50
   3   6  -1   83.09   33.60
   3   6  -1   86.99   31.40
   3   6  -1   88.39   21.70
  -3  -6   1   79.09   22.70
  -3  -6   1  100.59   27.10
  -3  -6   1   79.69   24.80
  -3  -6   1  104.69   29.00
  -3  -6   1   74.49   26.30
   3   5  -1  680.33   45.10
   3   5  -1  604.14   44.10
   3   5  -1  559.24   41.60
   3   5  -1  568.84   39.60
   3   5  -1  607.74   56.79
   3   5  -1  632.34   34.90
   3   5  -1  571.94   37.60
  -3  -5   1  604.44   44.10
  -3  -5   1  640.94   36.20
  -3  -5   1  593.04   40.70
  -3  -5   1  648.44   45.50
  -3  -5   1  582.74   38.50
   3   4  -1  208.58   23.80
   3   4  -1  264.27   36.30
   3   4  -1  257.37   25.60
   3   4  -1  234.38   32.40
   3   4  -1  206.08   23.80
   3   4  -1  161.08   25.80
   3   4  -1  210.98   28.70
  -3  -4   1  177.98   29.90
  -3  -4   1  197.78   26.20
  -3  -4   1  204.38   30.20
  -3  -4   1  246.48   29.90
  -3  -4   1  192.88   23.70
   3   3  -1  745.63   44.30
   3   3  -1  754.62   30.30
   3   3  -1  704.73   36.30
   3   3  -1  651.63   33.70
   3   3  -1  703.93   32.50
   3   3  -1  682.63   29.30
   3   3  -1  735.83   36.60
  -3  -3   1  683.43   35.40
  -3  -3   1  720.83   29.80
  -3  -3   1  659.43   33.60
  -3  -3   1  719.03   31.70
  -3  -3   1  646.64   46.30
  -3  -3   1  695.53   33.70
   3   2  -1 1385.56   46.70
   3   2  -1 1475.75   44.40
   3   2  -1 1374.36   43.70
   3   2  -1 1435.66   54.19
   3   2  -1 1427.16   43.30
  -3  -2   1 1339.87   54.69
  -3  -2   1 1445.56   46.40
  -3  -2   1 1398.06   38.70
  -3  -2   1 1266.67   44.10
  -3  -2   1 1342.77   46.10
  -3  -2   1 1357.06   43.10
  -3  -2   1 1365.36   53.09
   3  -2  -1 1374.56   48.40
   3  -2  -1 1375.36   41.90
   3  -2  -1 1459.75   44.70
   3  -2  -1 1420.06   46.10
   3  -2  -1 1369.86   46.80
   3  -2  -1 1439.76   47.30
   3  -2  -1 1371.66   44.70
  -3   2   1 1346.07   41.20
  -3   2   1 1310.77   51.19
  -3   2   1 1318.17   44.40
  -3   2   1 1375.16   46.40
  -3   2   1 1413.56   49.10
  -3   2   1 1449.15   45.50
  -3   2   1 1393.66   44.80
   3  -3  -1  700.53   27.50
   3  -3  -1  684.23   30.90
   3  -3  -1  724.73   36.70
   3  -3  -1  647.24   33.80
   3  -3  -1  740.63   31.80
   3  -3  -1  682.43   34.60
  -3   3   1  689.73   33.60
  -3   3   1  686.53   29.50
  -3   3   1  693.13   33.40
  -3   3   1  688.33   37.60
  -3   3   1  692.73   27.20
   3  -4  -1  212.08   33.00
   3  -4  -1  237.38   25.60
   3  -4  -1  203.38   29.90
   3  -4  -1  182.68   25.80
   3  -4  -1  210.28   27.40
   3  -4  -1  197.08   24.50
  -3   4   1  184.98   31.00
  -3   4   1  262.57   34.40
  -3   4   1  221.88   23.60
  -3   4   1  228.08   30.00
  -3   4   1  182.48   23.20
  -3   4   1  210.88   23.30
  -3   4   1  219.18   32.20
   3  -5  -1  569.94   36.80
   3  -5  -1  686.83   41.10
   3  -5  -1  611.64   42.70
   3  -5  -1  621.54   44.00
   3  -5  -1  585.84   33.00
   3  -5  -1  612.44   46.10
  -3   5   1  626.94   47.00
  -3   5   1  579.24   40.00
  -3   5   1  582.54   32.30
  -3   5   1  579.34   42.10
  -3   5   1  565.54   40.10
  -3   5   1  624.04   36.70
  -3   5   1  580.14   58.99
   3  -6  -1   69.09   20.20
   3  -6  -1   96.89   25.60
   3  -6  -1   71.99   27.30
   3  -6  -1   75.19   23.80
   3  -6  -1   77.69   50.09
  -3   6   1   41.80   24.90
  -3   6   1   51.59   26.60
  -3   6   1   99.89   23.60
  -3   6   1  118.29   23.60
  -3   6   1   69.09   33.60
  -3   6   1   70.09   18.40
  -3   6   1   84.29   28.80
   4   6  -1   56.99   21.90
   4   6  -1   46.40   27.20
   4   6  -1   42.50   24.70
   4   6  -1   21.60   20.60
   4   6  -1   24.40   31.60
   4   6  -1   44.40   26.30
  -4  -6   1   44.20   25.00
  -4  -6   1   56.19   25.30
  -4  -6   1   40.80   22.40
  -4  -6   1   44.70   28.00
  -4  -6   1   32.60   24.30
   4   5  -1  453.85   39.50
   4   5  -1  483.35   39.40
   4   5  -1  562.04   75.29
   4   5  -1  460.85   43.10
   4   5  -1  432.56   42.60
   4   5  -1  467.35   33.10
   4   5  -1  455.55   34.50
  -4  -5   1  524.85   39.90
  -4  -5   1  519.15   39.60
  -4  -5   1  517.05   40.50
  -4  -5   1  485.05   60.39
  -4  -5   1  499.35   34.80
  -4  -5   1  492.85   41.90
   4   4  -1  194.98   24.30
   4   4  -1  207.18   28.90
   4   4  -1  233.28   27.80
   4   4  -1  216.68   26.40
   4   4  -1  258.07   27.20
   4   4  -1  228.58   25.10
   4   4  -1  369.86   61.49
  -4  -4   1  214.58   30.30
  -4  -4   1  232.58   28.20
  -4  -4   1  207.08   30.60
  -4  -4   1  215.78   31.80
  -4  -4   1  217.08   30.80
  -4  -4   1  196.58   34.00
   4   3  -1  644.44   36.50
   4   3  -1  661.63   33.70
   4   3  -1  602.94   41.60
   4   3  -1  646.34   28.80
   4   3  -1  649.93   30.30
  -4  -3   1  599.94   45.10
  -4  -3   1  640.14   31.80
  -4  -3   1  618.04   32.80
  -4  -3   1  627.04   33.80
  -4  -3   1  660.73   29.00
  -4  -3   1  639.24   31.20
   4   2  -1 2222.88   61.79
   4   2  -1 2220.88   74.39
   4   2  -1 2179.98   63.59
   4   2  -1 2202.98   64.89
   4   2  -1 2138.29   67.59
   4   2  -1 2092.99   65.79
  -4  -2   1 2183.38   63.69
  -4  -2   1 2300.97   67.19
  -4  -2   1 2043.60   68.09
  -4  -2   1 2305.77   66.19
  -4  -2   1 2196.28   61.49
  -4  -2   1 2175.18   65.09
   4   1  -1 3720.53  108.09
   4   1  -1 3668.03  101.29
   4   1  -1 3742.13  103.69
   4   1  -1 3629.54  100.09
  -4  -1   1 3466.65  100.09
  -4  -1   1 3722.43  101.29
  -4  -1   1 3725.73  111.39
   4  -1  -1 3412.96  100.19
   4  -1  -1 3408.06   98.09
   4  -1  -1 3527.35   97.89
   4  -1  -1 3331.57  101.89
   4  -1  -1 3643.84  101.09
   4  -1  -1 3434.86  104.79
  -4   1   1 3908.01  107.39
  -4   1   1 3541.15   99.79
  -4   1   1 3463.45   97.89
  -4   1   1 3639.34   98.29
  -4   1   1 3606.84   98.59
  -4   1   1 3630.34   98.59
  -4   1   1 3959.50  101.99
   4  -2  -1 2195.38   69.39
   4  -2  -1 2138.39   67.89
   4  -2  -1 2198.78   67.89
   4  -2  -1 2241.58   68.69
   4  -2  -1 2179.88   66.09
   4  -2  -1 2141.39   62.59
   4  -2  -1 2178.48   65.09
  -4   2   1 2337.07   67.19
  -4   2   1 2267.07   71.59
  -4   2   1 2195.48   65.79
  -4   2   1 2229.18   66.79
  -4   2   1 2374.86   70.99
  -4   2   1 2250.17   66.39
   4  -3  -1  652.93   36.10
   4  -3  -1  719.53   32.60
   4  -3  -1  632.04   33.40
   4  -3  -1  643.94   34.90
   4  -3  -1  639.34   30.00
   4  -3  -1  626.24   25.30
   4  -3  -1  637.04   30.70
  -4   3   1  646.24   31.80
  -4   3   1  667.43   32.30
  -4   3   1  668.73   37.30
  -4   3   1  645.44   30.80
  -4   3   1  680.23   32.60
  -4   3   1  553.74   39.80
   4  -4  -1  228.28   27.30
   4  -4  -1  185.88   26.30
   4  -4  -1  248.08   34.30
   4  -4  -1  220.38   25.80
   4  -4  -1  194.38   22.30
   4  -4  -1  227.18   31.40
  -4   4   1  211.18   30.20
  -4   4   1  219.08   30.80
  -4   4   1  183.48   20.00
  -4   4   1  233.28   29.60
  -4   4   1  255.17   37.40
  -4   4   1  212.78   27.40
  -4   4   1  247.28   36.60
   4  -5  -1  442.76   40.30
   4  -5  -1  487.25   43.50
   4  -5  -1  454.25   38.70
   4  -5  -1  465.65   34.40
   4  -5  -1  428.76   32.00
   4  -5  -1  484.75   44.20
  -4   5   1  442.46   39.50
  -4   5   1  464.05   35.50
  -4   5   1  577.44   54.59
  -4   5   1  442.46   45.30
  -4   5   1  519.25   37.70
  -4   5   1  434.66   37.80
  -4   5   1  506.75   58.49
  -4   5   1  432.36   38.10
   4  -6  -1   36.50   30.80
   4  -6  -1   39.40   21.50
   4  -6  -1   37.40   21.60
   4  -6  -1   40.20   24.50
   4  -6  -1   67.19   26.90
   4  -6  -1   46.50   27.50
  -4   6   1  134.19   44.50
  -4   6   1   59.79   22.40
  -4   6   1   27.40   26.50
  -4   6   1   58.49   34.40
  -4   6   1   15.00   25.40
  -4   6   1   45.80   29.50
  -4   6   1   77.79   23.30
   5   6  -1   13.10   20.90
   5   6  -1   57.49   29.80
   5   6  -1   13.70   32.50
   5   6  -1   17.40   27.90
   5   6  -1   24.60   26.90
   5   6  -1   40.80   22.00
  -5  -6   1   24.90   29.10
  -5  -6   1   30.60   26.50
  -5  -6   1   30.90   23.00
  -5  -6   1   18.10   23.20
  -5  -6   1   33.40   26.30
   5   5  -1  421.56   32.90
   5   5  -1  433.96   35.20
   5   5  -1  391.06   49.10
   5   5  -1  359.26   38.90
   5   5  -1  428.86   52.89
   5   5  -1  446.06   43.20
  -5  -5   1  405.66   38.90
  -5  -5   1  418.06   41.20
  -5  -5   1  446.46   41.70
  -5  -5   1  378.56   58.29
  -5  -5   1  409.86   39.00
  -5  -5   1  424.76   34.70
   5   4  -1 3486.55  119.59
   5   4  -1 3752.92  110.89
   5   4  -1 3650.93  104.29
   5   4  -1 3531.55  111.49
   5   4  -1 3499.85  108.69
   5   4  -1 3641.94  104.49
  -5  -4   1 3331.37  122.59
  -5  -4   1 3682.03  108.19
  -5  -4   1 3559.24  106.99
  -5  -4   1 3575.84  108.29
  -5  -4   1 3488.25  104.89
  -5  -4   1 3581.34  104.39
   5   3  -1  893.41   48.50
   5   3  -1  854.81   35.50
   5   3  -1  884.31   44.30
   5   3  -1  903.11   36.10
  -5  -3   1  902.51   37.40
  -5  -3   1  926.01   39.90
  -5  -3   1  901.51   40.00
  -5  -3   1  921.51   52.69
  -5  -3   1  886.81   28.90
  -5  -3   1  900.21   36.90
  -5  -3   1  916.31   36.20
   5   2  -1 1927.51   63.09
   5   2  -1 1950.20   59.99
   5   2  -1 1866.91   57.69
   5   2  -1 1883.41   62.69
   5   2  -1 1994.00   69.29
   5   2  -1 1987.90   59.69
  -5  -2   1 1973.20   60.29
  -5  -2   1 1877.21   71.09
  -5  -2   1 2002.10   59.89
  -5  -2   1 2039.10   62.59
  -5  -2   1 1932.01   58.89
  -5  -2   1 2037.60   62.59
  -5  -2   1 1948.41   57.79
   5   1  -1  783.92   29.50
   5   1  -1  733.93   31.40
   5   1  -1  768.42   35.50
   5   1  -1  843.82   38.80
   5   1  -1  802.02   31.00
   5   1  -1  782.42   33.50
   5   1  -1  784.32   31.20
  -5  -1   1  848.62   32.30
  -5  -1   1  832.32   31.70
  -5  -1   1  789.52   29.80
  -5  -1   1  791.22   32.10
  -5  -1   1  808.82   33.30
   5  -1  -1  860.31   33.60
   5  -1  -1  650.73   52.39
   5  -1  -1  761.32   30.20
   5  -1  -1  822.32   32.70
   5  -1  -1  828.52   34.90
   5  -1  -1  792.22   34.90
   5  -1  -1  736.23   35.80
  -5   1   1  812.42   30.60
  -5   1   1  831.32   33.90
  -5   1   1  857.71   32.90
  -5   1   1  863.51   35.00
  -5   1   1  769.52   35.90
  -5   1   1  817.02   32.80
  -5   1   1  820.02   30.50
   5  -2  -1 1973.40   59.69
   5  -2  -1 1985.80   62.29
   5  -2  -1 2123.49   63.89
   5  -2  -1 1993.90   62.29
   5  -2  -1 1925.31   63.79
   5  -2  -1 1970.50   63.99
   5  -2  -1 1805.72   56.19
  -5   2   1 1901.91   64.29
  -5   2   1 2065.09   61.19
  -5   2   1 1892.91   59.89
  -5   2   1 2016.20   61.09
  -5   2   1 1953.50   65.19
  -5   2   1 1914.71   64.99
   5  -3  -1  915.31   39.80
   5  -3  -1  912.31   42.50
   5  -3  -1  884.11   30.40
   5  -3  -1  898.81   39.80
   5  -3  -1  873.41   37.30
   5  -3  -1  879.41   36.60
   5  -3  -1  923.31   37.90
  -5   3   1  999.50   38.60
  -5   3   1  929.71   44.00
  -5   3   1  923.41   38.10
  -5   3   1  905.61   45.00
  -5   3   1  923.51   37.40
  -5   3   1  928.01   38.10
   5  -4  -1 3624.54  106.39
   5  -4  -1 3535.35  107.49
   5  -4  -1 3620.84  111.09
   5  -4  -1 3532.25  104.89
   5  -4  -1 3607.44  104.09
   5  -4  -1 3612.64  108.39
  -5   4   1 3474.65  113.59
  -5   4   1 3553.84  105.19
  -5   4   1 3190.38  103.69
  -5   4   1 3539.15  105.99
  -5   4   1 3638.84  111.69
  -5   4   1 3553.74  105.79
   5  -5  -1  386.66   40.20
   5  -5  -1  397.96   36.40
   5  -5  -1  389.06   34.10
   5  -5  -1  415.06   41.90
   5  -5  -1  381.46   43.40
   5  -5  -1  406.56   35.20
  -5   5   1  458.65   57.99
  -5   5   1  436.86   37.50
  -5   5   1  447.76   51.99
  -5   5   1  438.06   35.70
  -5   5   1  426.76   40.70
  -5   5   1  455.75   37.50
  -5   5   1  397.26   45.20
   5  -6  -1    8.30   28.20
   5  -6  -1   19.60   23.30
   5  -6  -1    8.80   23.10
   5  -6  -1   29.90   21.30
   5  -6  -1   29.50   48.00
   5  -6  -1   16.80   28.40
  -5   6   1   11.20   29.20
  -5   6   1   89.49   39.30
  -5   6   1   48.60   35.80
  -5   6   1   46.10   23.80
  -5   6   1   -9.70   25.60
  -5   6   1   10.40   21.60
  -5   6   1  -13.70   27.80
   6   6  -1  -23.90   20.70
   6   6  -1  -11.20   20.90
   6   6  -1   33.50   38.80
   6   6  -1   -3.80   32.20
  -6  -6   1   24.40   45.30
  -6  -6   1   -8.00   22.60
  -6  -6   1   13.10   22.40
  -6  -6   1   45.10   49.00
  -6  -6   1   15.30   26.80
   6   5  -1  381.16   34.00
   6   5  -1  408.96   34.00
   6   5  -1  384.46   53.19
   6   5  -1  393.66   46.50
   6   5  -1  376.96   40.40
   6   5  -1  400.66   44.00
  -6  -5   1  324.07   57.89
  -6  -5   1  358.26   49.60
  -6  -5   1  409.66   41.00
  -6  -5   1  406.66   42.60
  -6  -5   1  439.66   36.00
  -6  -5   1  436.36   39.30
   6   4  -1 1328.77   51.69
   6   4  -1 1328.67   60.99
   6   4  -1 1301.17   99.09
   6   4  -1 1480.25   52.09
  -6  -4   1 1408.16   52.49
  -6  -4   1 1363.06   54.09
  -6  -4   1 1366.56   60.99
  -6  -4   1 1464.95   85.39
  -6  -4   1 1394.86   53.69
   6   3  -1  273.97   36.30
   6   3  -1  250.67   25.70
   6   3  -1  299.77   34.10
   6   3  -1  253.67   24.80
   6   3  -1  251.27   19.70
   6   3  -1  293.67   31.80
  -6  -3   1  291.47   25.40
  -6  -3   1  305.87   28.80
  -6  -3   1  284.67   29.70
  -6  -3   1  285.27   19.10
  -6  -3   1  413.26   59.79
  -6  -3   1  310.07   30.70
  -6  -3   1  259.87   25.30
   6   2  -1 3068.49   91.19
   6   2  -1 2958.30   87.99
   6   2  -1 3091.09   87.89
   6   2  -1 3049.50   87.79
   6   2  -1 3092.69   91.19
   6   2  -1 3178.58   97.69
   6   2  -1 3067.99   93.09
  -6  -2   1 3064.29   88.49
  -6  -2   1 3037.40   87.49
  -6  -2   1 3072.19   89.89
  -6  -2   1 2932.41   89.69
  -6  -2   1 2936.31   86.49
  -6  -2   1 3048.40   88.19
   6   1  -1 2426.96   71.19
   6   1  -1 2331.67   72.99
   6   1  -1 2455.45   75.29
   6   1  -1 2531.35   72.59
   6   1  -1 2468.95   79.99
   6   1  -1 2457.75   74.29
   6   1  -1 2433.26   73.09
  -6  -1   1 2534.05   81.69
  -6  -1   1 2518.35   73.79
  -6  -1   1 2240.08   72.19
  -6  -1   1 2420.36   73.59
  -6  -1   1 2397.26   72.59
  -6  -1   1 2450.55   71.49
   6  -1  -1 2579.84   76.39
   6  -1  -1 2478.05   72.69
   6  -1  -1 2541.45   73.49
   6  -1  -1 2429.26   76.49
   6  -1  -1 2441.36   72.69
   6  -1  -1 2534.55   73.49
  -6   1   1 2437.06   74.09
  -6   1   1 2430.56   77.59
  -6   1   1 2560.14   75.39
  -6   1   1 2390.16   72.69
  -6   1   1 2356.86   72.09
  -6   1   1 2478.15   75.09
  -6   1   1 2417.96   72.29
   6  -2  -1 3092.59   90.09
   6  -2  -1 3054.79   87.09
   6  -2  -1 3086.29   88.29
   6  -2  -1 2955.20   90.79
   6  -2  -1 2888.81   82.79
   6  -2  -1 2972.60   87.39
   6  -2  -1 2838.02   86.79
  -6   2   1 3053.19   91.29
  -6   2   1 2943.11   87.79
  -6   2   1 2880.41   86.89
  -6   2   1 3061.49   90.99
  -6   2   1 2951.60   86.49
  -6   2   1 3088.09   87.79
  -6   2   1 3017.80   91.09
   6  -3  -1  328.27   30.10
   6  -3  -1  340.27   30.60
   6  -3  -1  299.97   26.90
   6  -3  -1  335.57   31.60
   6  -3  -1  273.67   18.10
   6  -3  -1  296.87   26.20
   6  -3  -1  317.57   29.40
  -6   3   1  301.27   27.60
  -6   3   1  238.48   34.00
  -6   3   1  313.17   27.90
  -6   3   1  317.67   28.70
  -6   3   1  303.37   27.30
  -6   3   1  298.67   34.60
   6  -4  -1 1330.37   51.79
   6  -4  -1 1391.56   54.49
   6  -4  -1 1326.07   65.19
   6  -4  -1 1300.57   55.99
   6  -4  -1 1395.46   51.69
  -6   4   1 1361.46   65.39
  -6   4   1 1406.46   58.19
  -6   4   1 1280.47   53.39
  -6   4   1 1324.77   63.09
  -6   4   1 1313.17   52.09
   6  -5  -1  382.66   40.20
   6  -5  -1  343.77   43.90
   6  -5  -1  394.76   34.30
   6  -5  -1  395.06   37.10
   6  -5  -1  430.66   42.50
   6  -5  -1  381.26   36.50
  -6   5   1  439.96   38.00
  -6   5   1  437.46   45.90
  -6   5   1  349.96   36.70
  -6   5   1  360.26   57.39
  -6   5   1  436.66   36.20
  -6   5   1  393.36   50.89
  -6   5   1  397.26   38.20
   6  -6  -1   -4.40   22.40
   6  -6  -1  -22.40   35.20
   6  -6  -1   16.90   34.60
   6  -6  -1  -34.20   21.50
   6  -6  -1    3.40   26.00
  -6   6   1    8.10   39.90
  -6   6   1   36.80   22.60
  -6   6   1   68.69   58.19
  -6   6   1   20.20   23.90
  -6   6   1   10.30   30.50
  -6   6   1  -66.79   38.40
   7   6  -1   84.09   34.70
   7   6  -1   91.99   25.40
   7   6  -1   65.49   25.60
   7   6  -1   93.49   31.60
   7   6  -1  160.88   32.10
   7   6  -1  119.79   33.80
  -7  -6   1  120.99   27.60
  -7  -6   1  105.69   36.70
  -7  -6   1  139.39   30.80
  -7  -6   1  123.19   29.40
  -7  -6   1  131.09   40.20
  -7  -6   1  144.69   31.20
   7   5  -1  179.78   24.70
   7   5  -1   89.89   27.20
   7   5  -1  183.88   35.00
   7   5  -1  142.09   23.50
   7   5  -1  182.88   42.70
  -7  -5   1  142.39   41.90
  -7  -5   1  180.98   28.20
  -7  -5   1  152.48   28.50
  -7  -5   1  126.99   26.90
  -7  -5   1  154.78   26.80
   7   4  -1 1240.48   49.99
   7   4  -1 1282.07   50.79
   7   4  -1 1263.27   57.29
  -7  -4   1 1268.67   52.89
  -7  -4   1 1341.97   56.59
  -7  -4   1 1206.98   51.29
  -7  -4   1 1319.57   51.49
  -7  -4   1 1192.18   55.89
  -7  -4   1 1160.08   72.09
   7   3  -1   15.00   20.50
   7   3  -1   20.20   23.30
   7   3  -1   25.00   21.30
   7   3  -1   36.70   16.20
   7   3  -1   14.30   14.60
   7   3  -1   32.40   21.90
   7   3  -1   46.40   16.40
  -7  -3   1   14.30   18.70
  -7  -3   1   47.10   16.70
  -7  -3   1   34.40   24.00
  -7  -3   1   33.10   18.00
  -7  -3   1   56.59   18.70
  -7  -3   1   34.00   19.60
   7   2  -1 1573.54   56.39
   7   2  -1 1575.34   52.89
   7   2  -1 1567.04   57.89
   7   2  -1 1564.74   56.39
   7   2  -1 1657.83   52.69
   7   2  -1 1558.64   51.89
   7   2  -1 1649.04   63.09
  -7  -2   1 1506.15   51.69
  -7  -2   1 1602.84   55.19
  -7  -2   1 1547.55   53.29
  -7  -2   1 1517.25   65.49
  -7  -2   1 1639.34   55.89
  -7  -2   1 1583.24   52.19
   7   0  -1  744.03   35.50
   7   0  -1  793.22   32.70
   7   0  -1  805.32   34.40
   7   0  -1  762.42   35.70
   7   0  -1  734.43   36.60
   7   0  -1  741.63   33.30
  -7   0   1  703.43   31.90
  -7   0   1  709.13   36.50
  -7   0   1  785.72   44.20
  -7   0   1  737.83   34.80
  -7   0   1  709.13   35.80
  -7   0   1  729.83   33.60
  -7   0   1  716.53   38.30
   7  -2  -1 1663.53   57.39
   7  -2  -1 1629.14   53.99
   7  -2  -1 1620.54   58.19
   7  -2  -1 1648.73   55.29
   7  -2  -1 1599.84   55.19
   7  -2  -1 1557.64   53.69
  -7   2   1 1646.94   59.09
  -7   2   1 1558.34   55.09
  -7   2   1 1634.64   54.59
  -7   2   1 1635.34   54.19
  -7   2   1 1606.74   54.39
  -7   2   1 1635.04   59.59
  -7   2   1 1560.44   57.59
   7  -3  -1   49.10   18.50
   7  -3  -1   55.99   19.70
   7  -3  -1   35.60   10.60
   7  -3  -1   63.09   21.00
   7  -3  -1   49.90   19.10
   7  -3  -1   20.50   17.00
   7  -3  -1   44.70   18.00
  -7   3   1   41.90   18.30
  -7   3   1   52.39   19.00
  -7   3   1   51.29   19.70
  -7   3   1   44.10   25.40
  -7   3   1   35.00   20.00
  -7   3   1   46.00   19.60
   7  -4  -1 1244.18   50.69
   7  -4  -1 1193.28   53.69
   7  -4  -1 1234.58   54.89
   7  -4  -1 1241.68   49.90
   7  -4  -1 1289.97   55.59
   7  -4  -1 1217.38   57.09
  -7   4   1 1212.68   50.99
  -7   4   1 1195.58   52.19
  -7   4   1 1198.58   51.49
  -7   4   1 1224.18   60.89
  -7   4   1 1195.88   59.89
  -7   4   1 1207.38   52.59
   7  -5  -1  126.69   26.70
   7  -5  -1  156.88   27.70
   7  -5  -1  152.48   37.30
   7  -5  -1  181.48   25.90
   7  -5  -1  161.68   28.20
  -7   5   1  162.78   38.30
  -7   5   1  129.69   37.70
  -7   5   1  142.39   25.10
  -7   5   1  205.58   35.00
  -7   5   1  138.59   25.90
   7  -6  -1  160.18   32.20
   7  -6  -1   54.59   26.70
   7  -6  -1  111.89   39.00
   7  -6  -1   72.59   28.20
   7  -6  -1  101.69   28.30
   7  -6  -1   83.39   26.20
  -7   6   1   50.29   28.90
  -7   6   1   39.40   27.70
  -7   6   1  159.08   28.50
  -7   6   1  168.28   36.10
  -7   6   1  100.59   35.10
  -7   6   1  188.28   55.79
   8   5  -1  305.17   43.10
   8   5  -1  333.97   39.80
   8   5  -1  262.37   50.49
   8   5  -1  264.37   33.90
   8   5  -1  283.37   36.60
   8   5  -1  275.17   35.10
  -8  -5   1  330.77   41.10
  -8  -5   1  365.76   40.40
  -8  -5   1  320.77   64.09
  -8  -5   1  347.27   38.00
  -8  -5   1  354.56   37.20
  -8  -5   1  328.07   40.30
   8   4  -1  182.38   33.40
   8   4  -1  147.39   22.80
   8   4  -1   99.79   25.90
   8   4  -1  146.59   32.50
   8   4  -1  161.18   35.70
  -8  -4   1  138.39   35.50
  -8  -4   1  132.69   25.80
  -8  -4   1  138.09   26.10
  -8  -4   1  154.38   23.90
  -8  -4   1  145.79   25.80
  -8  -4   1  153.78   23.50
   8   3  -1 1034.00   46.80
   8   3  -1 1084.99   57.59
   8   3  -1 1103.59   44.40
   8   3  -1  985.80   50.19
   8   3  -1  972.80   53.29
   8   3  -1  995.40   40.80
   8   3  -1 1034.30   51.99
  -8  -3   1 1017.90   42.80
  -8  -3   1 1057.49   45.60
  -8  -3   1 1038.50   40.20
  -8  -3   1  993.50   45.10
  -8  -3   1 1018.00   43.40
  -8  -3   1  964.80   62.29
  -8  -3   1 1088.59   47.30
   8   2  -1  603.74   32.00
   8   2  -1  580.24   37.80
   8   2  -1  670.63   43.50
   8   2  -1  571.04   32.40
   8   2  -1  596.04   38.00
   8   2  -1  611.34   36.70
   8   2  -1  619.94   37.70
  -8  -2   1  589.74   36.20
  -8  -2   1  564.54   47.90
  -8  -2   1  597.34   33.70
  -8  -2   1  611.84   36.10
  -8  -2   1  608.54   33.40
  -8  -2   1  627.94   33.10
   8   1  -1 2591.34   80.59
   8   1  -1 2561.64   80.99
   8   1  -1 2660.93   78.29
   8   1  -1 2498.15   79.79
   8   1  -1 2651.23   80.29
   8   1  -1 2800.32   88.99
   8   1  -1 2778.62   79.29
  -8  -1   1 2638.24   81.49
  -8  -1   1 2582.44   79.59
  -8  -1   1 2667.43   79.89
  -8  -1   1 2450.85   89.19
  -8  -1   1 2561.14   80.09
  -8  -1   1 2620.04   79.29
   8   0  -1 2589.64   77.59
   8   0  -1 2538.85   77.09
   8   0  -1 2491.35   76.09
   8   0  -1 2456.95   74.89
   8   0  -1 2420.46   78.59
   8   0  -1 2573.04   76.19
  -8   0   1 2474.45   78.49
  -8   0   1 2541.85   76.19
  -8   0   1 2498.25   76.29
  -8   0   1 2571.74   77.29
  -8   0   1 2419.66   75.59
  -8   0   1 2475.35   74.99
  -8   0   1 2505.15   85.79
  -8   0   1 2518.35   80.09
   8  -1  -1 2693.63   80.89
   8  -1  -1 2670.73   80.49
   8  -1  -1 2678.23   82.79
   8  -1  -1 2631.94   80.39
   8  -1  -1 2535.05   83.59
   8  -1  -1 2794.72   80.99
  -8   1   1 2676.93   81.99
  -8   1   1 2673.63   79.69
  -8   1   1 2621.84   79.99
  -8   1   1 2681.63   85.59
  -8   1   1 2658.93   80.39
  -8   1   1 2522.75   81.89
  -8   1   1 2849.31   81.59
   8  -2  -1  652.43   34.80
   8  -2  -1  586.54   39.60
   8  -2  -1  665.93   36.40
   8  -2  -1  664.53   34.00
   8  -2  -1  647.94   34.50
   8  -2  -1  661.73   38.50
   8  -2  -1  585.84   31.10
  -8   2   1  627.34   33.90
  -8   2   1  647.54   40.30
  -8   2   1  645.14   39.30
  -8   2   1  669.63   43.50
  -8   2   1  653.33   35.90
  -8   2   1  561.24   36.90
  -8   2   1  627.64   33.80
   8  -3  -1 1030.10   44.70
   8  -3  -1 1077.69   50.19
   8  -3  -1 1088.49   50.39
   8  -3  -1 1090.39   50.09
   8  -3  -1 1059.49   45.80
   8  -3  -1 1054.49   47.30
   8  -3  -1  995.20   35.50
  -8   3   1 1058.69   52.99
  -8   3   1 1070.49   61.39
  -8   3   1  974.20   42.80
  -8   3   1 1059.09   51.49
  -8   3   1 1037.70   46.60
   8  -4  -1  127.39   25.10
   8  -4  -1  176.58   28.30
   8  -4  -1  136.09   22.80
   8  -4  -1  226.98   31.10
   8  -4  -1  170.08   27.10
   8  -4  -1  155.28   25.00
  -8   4   1  167.18   40.50
  -8   4   1  144.29   29.80
  -8   4   1  248.98   57.49
  -8   4   1  159.38   25.40
  -8   4   1  125.49   24.40
  -8   4   1  136.99   24.40
   8  -5  -1  342.67   41.90
   8  -5  -1  320.27   43.90
   8  -5  -1  271.47   37.20
   8  -5  -1  273.67   41.10
   8  -5  -1  307.97   36.50
   8  -5  -1  345.67   40.10
  -8   5   1  225.48   39.50
  -8   5   1  264.07   30.70
  -8   5   1  328.67   47.70
  -8   5   1  289.57   38.40
  -8   5   1  311.37   38.00
   9   5  -1   28.00   27.50
   9   5  -1    8.20   31.80
   9   5  -1  -16.30   21.60
   9   5  -1   28.30   29.80
   9   5  -1   24.30   27.20
   9   5  -1   12.00   22.20
   9   5  -1  -13.90   26.00
  -9  -5   1   18.30   23.70
  -9  -5   1   30.80   27.50
  -9  -5   1   45.80   37.40
  -9  -5   1   -4.00   26.60
  -9  -5   1   41.30   22.70
  -9  -5   1   34.10   25.50
   9   4  -1  624.84   41.40
   9   4  -1  512.55   49.90
   9   4  -1  613.04   36.20
   9   4  -1  638.64   55.89
   9   4  -1  707.33   50.49
   9   4  -1  699.03   49.20
  -9  -4   1  574.84   44.40
  -9  -4   1  540.65   63.79
  -9  -4   1  665.73   45.10
  -9  -4   1  576.04   39.10
  -9  -4   1  625.14   44.60
  -9  -4   1  653.93   41.60
   9   3  -1  167.08   32.60
   9   3  -1  132.99   22.00
   9   3  -1   95.09   19.60
   9   3  -1  118.29   31.20
   9   3  -1  121.99   21.90
   9   3  -1  122.89   37.20
   9   3  -1   69.09   22.40
   9   3  -1   99.09   24.60
  -9  -3   1  118.49   21.50
  -9  -3   1   94.79   32.80
  -9  -3   1  135.19   21.70
  -9  -3   1   85.79   22.60
  -9  -3   1  109.29   20.50
  -9  -3   1  131.59   23.30
   9   2  -1  424.36   31.20
   9   2  -1  510.05   32.30
   9   2  -1  453.25   36.40
   9   2  -1  450.65   42.90
   9   2  -1  450.15   32.40
   9   2  -1  477.55   38.50
   9   2  -1  406.36   36.90
  -9  -2   1  446.36   33.10
  -9  -2   1  425.56   35.70
  -9  -2   1  456.35   34.60
  -9  -2   1  457.15   35.50
  -9  -2   1  464.75   33.50
  -9  -2   1  414.86   47.20
   9   1  -1 1056.29   42.80
   9   1  -1 1035.70   52.29
   9   1  -1 1019.90   44.50
   9   1  -1 1000.20   45.60
   9   1  -1 1061.89   44.00
   9   1  -1  984.00   44.50
   9   1  -1 1125.89   43.60
  -9  -1   1 1063.99   45.00
  -9  -1   1 1105.49   46.70
  -9  -1   1 1019.10   41.60
  -9  -1   1 1106.89   44.80
  -9  -1   1 1131.49   46.10
  -9  -1   1 1040.10   56.69
   9   0  -1 3235.88   98.29
   9   0  -1 3219.68  100.59
   9   0  -1 3392.66   97.09
   9   0  -1 3224.98   97.99
   9   0  -1 3336.67   97.19
   9   0  -1 3343.97   97.69
  -9   0   1 3268.97   96.99
  -9   0   1 3361.76   98.49
  -9   0   1 3154.78   95.99
  -9   0   1 3355.76   97.39
  -9   0   1 3380.36  101.59
  -9   0   1 3252.07   99.39
  -9   0   1 3325.27   97.49
   9  -1  -1 1113.49   44.10
   9  -1  -1 1054.79   42.30
   9  -1  -1 1076.69   47.70
   9  -1  -1 1112.69   43.80
   9  -1  -1 1037.50   43.90
   9  -1  -1  993.00   45.80
  -9   1   1 1072.79   45.10
  -9   1   1 1008.30   45.20
  -9   1   1 1054.99   41.90
  -9   1   1 1106.09   44.80
  -9   1   1  994.00   42.80
  -9   1   1 1105.89   50.09
  -9   1   1 1060.49   45.30
   9  -2  -1  480.05   33.80
   9  -2  -1  487.55   33.00
   9  -2  -1  446.56   38.30
   9  -2  -1  467.95   33.80
   9  -2  -1  468.35   30.40
   9  -2  -1  528.85   39.00
  -9   2   1  446.66   33.80
  -9   2   1  493.75   35.80
  -9   2   1  464.65   36.40
  -9   2   1  495.45   38.80
  -9   2   1  437.86   32.50
  -9   2   1  458.25   30.50
  -9   2   1  511.75   40.80
   9  -3  -1   67.29   34.10
   9  -3  -1  122.59   23.10
   9  -3  -1  163.88   28.40
   9  -3  -1  104.39   21.90
   9  -3  -1  119.69   27.40
   9  -3  -1  127.79   19.90
   9  -3  -1  127.29   22.80
  -9   3   1  140.59   28.80
  -9   3   1  140.39   24.60
  -9   3   1  160.98   36.00
  -9   3   1  155.38   24.80
  -9   3   1   82.89   23.20
  -9   3   1  151.68   30.60
   9  -4  -1  623.04   46.80
   9  -4  -1  624.74   47.40
   9  -4  -1  617.64   40.80
   9  -4  -1  655.73   40.70
   9  -4  -1  549.35   45.70
   9  -4  -1  659.13   44.20
  -9   4   1  560.84   42.30
  -9   4   1  618.84   41.90
  -9   4   1  638.84   50.79
  -9   4   1  610.14   44.10
  -9   4   1  672.43   42.50
  -9   4   1  657.73   50.79
   9  -5  -1   19.20   24.80
   9  -5  -1   -6.50   22.60
   9  -5  -1   37.40   22.80
   9  -5  -1   15.90   24.40
   9  -5  -1  -18.80   27.50
   9  -5  -1   -7.20   24.20
  -9   5   1  -22.50   24.30
  -9   5   1   36.90   24.80
  -9   5   1   31.60   28.00
  -9   5   1   13.90   22.70
  -9   5   1  -33.20   23.60
  10   5  -1  158.78   33.60
  10   5  -1  280.97   42.10
  10   5  -1  148.99   33.10
  10   5  -1  169.98   28.50
  10   5  -1  193.48   29.40
 -10  -5   1  185.68   29.20
 -10  -5   1  252.37   36.60
 -10  -5   1  330.77   47.00
 -10  -5   1  252.17   34.90
 -10  -5   1  143.49   64.09
  10   4  -1  285.57   50.49
  10   4  -1  391.66   54.99
  10   4  -1  273.67   35.50
  10   4  -1  262.27   43.40
  10   4  -1  229.58   33.80
  10   4  -1  345.77   35.50
 -10  -4   1  331.87   41.40
 -10  -4   1  307.27   37.90
 -10  -4   1  304.17   41.10
 -10  -4   1  273.87   40.20
 -10  -4   1  191.48   49.20
 -10  -4   1  301.97   34.80
  10   3  -1 1099.89   60.69
  10   3  -1 1201.98   59.29
  10   3  -1 1176.68   50.19
  10   3  -1 1148.69   64.99
  10   3  -1 1251.47   83.39
  10   3  -1 1152.58   63.39
  10   3  -1 1140.79   48.50
  10   3  -1 1183.08   48.10
 -10  -3   1 1159.18   51.89
 -10  -3   1 1173.78   48.90
 -10  -3   1 1194.18   48.60
 -10  -3   1 1107.79   53.09
 -10  -3   1 1161.28   52.59
 -10  -3   1 1284.97   75.59
 -10  -3   1 1007.50   69.89
  10   2  -1 1915.21   71.19
  10   2  -1 2051.39   73.79
  10   2  -1 1991.00   80.29
  10   2  -1 2071.29   68.49
  10   2  -1 2046.60   69.49
  10   2  -1 2058.49   68.19
  10   2  -1 2034.60   73.29
 -10  -2   1 1974.40   69.49
 -10  -2   1 2106.69   69.49
 -10  -2   1 2048.70   69.89
 -10  -2   1 2018.20   69.29
 -10  -2   1 1800.22   84.59
 -10  -2   1 1939.21   68.79
  10   1  -1  658.63   41.60
  10   1  -1  690.93   38.50
  10   1  -1  729.33   39.40
  10   1  -1  671.03   36.80
  10   1  -1  751.82   37.90
  10   1  -1  685.13   39.10
 -10  -1   1  699.73   39.70
 -10  -1   1  659.73   40.40
 -10  -1   1  694.73   42.10
 -10  -1   1  710.03   41.20
 -10  -1   1  592.84   51.49
 -10  -1   1  695.53   35.90
  10   0  -1 2870.51   88.39
  10   0  -1 3056.39   88.29
  10   0  -1 3048.20   86.59
  10   0  -1 2817.32   86.59
  10   0  -1 2836.02   87.79
  10   0  -1 2747.72   90.79
 -10   0   1 2997.60   88.89
 -10   0   1 2718.53   86.89
 -10   0   1 2809.92   86.89
 -10   0   1 2724.83   85.49
 -10   0   1 2752.02   86.79
 -10   0   1 2885.81   92.59
 -10   0   1 2732.93   89.19
 -10   0   1 2583.14   97.99
  10  -1  -1  698.03   37.90
  10  -1  -1  690.33   38.60
  10  -1  -1  680.53   39.20
  10  -1  -1  676.63   42.30
  10  -1  -1  694.03   40.00
  10  -1  -1  724.13   38.30
 -10   1   1  674.53   38.30
 -10   1   1  650.93   44.40
 -10   1   1  685.33   38.60
 -10   1   1  664.83   39.60
 -10   1   1  737.23   39.40
 -10   1   1  586.04   48.90
 -10   1   1  699.83   40.10
 -10   1   1  665.03   39.80
  10  -2  -1 1997.50   73.39
  10  -2  -1 2062.69   74.69
  10  -2  -1 1962.30   68.69
  10  -2  -1 1949.90   67.69
  10  -2  -1 2040.00   67.69
  10  -2  -1 2050.19   69.59
 -10   2   1 2068.19   72.19
 -10   2   1 1966.00   69.79
 -10   2   1 1895.01   67.09
 -10   2   1 2027.70   69.89
 -10   2   1 2018.70   73.49
 -10   2   1 2111.69   76.79
  10  -3  -1 1155.88   51.49
  10  -3  -1 1237.08   51.59
  10  -3  -1 1160.78   54.29
  10  -3  -1 1076.19   56.99
  10  -3  -1 1200.98   51.49
 -10   3   1 1122.39   54.99
 -10   3   1 1200.78   59.59
 -10   3   1 1140.39   56.79
 -10   3   1 1089.39   51.29
 -10   3   1 1164.78   51.69
 -10   3   1 1139.59   52.19
  10  -4  -1  277.77   42.60
  10  -4  -1  285.37   43.80
  10  -4  -1  274.27   31.60
  10  -4  -1  315.57   37.60
  10  -4  -1  251.67   31.90
  10  -4  -1  328.37   36.60
 -10   4   1  293.37   39.90
 -10   4   1  282.17   46.00
 -10   4   1  298.17   46.00
 -10   4   1  315.27   38.40
 -10   4   1  319.87   37.70
  10  -5  -1  246.58   44.30
  10  -5  -1  224.78   36.30
  10  -5  -1  217.78   29.50
  10  -5  -1  248.58   37.30
  10  -5  -1  282.37   42.60
 -10   5   1  330.67   51.89
 -10   5   1  230.28   31.50
 -10   5   1  293.87   48.70
 -10   5   1  232.88   30.60
 -10   5   1  166.98   32.40
  11   5  -1   30.50   27.10
  11   5  -1   46.20   30.30
  11   5  -1  105.69   66.09
  11   5  -1   61.99   35.50
  11   5  -1   46.70   32.70
 -11  -5   1   58.19   32.40
 -11  -5   1   83.79   25.60
 -11  -5   1   64.19   40.30
 -11  -5   1   29.80   28.90
 -11  -5   1   52.39   28.00
 -11  -5   1   76.69   34.30
  11   4  -1  247.88   37.30
  11   4  -1  292.57   52.59
  11   4  -1  253.87   35.90
  11   4  -1  282.77   38.00
  11   4  -1  372.76   43.50
  11   4  -1  277.77   44.30
 -11  -4   1  210.58   41.80
 -11  -4   1  319.67   42.20
 -11  -4   1  281.37   39.90
 -11  -4   1  345.67   35.50
 -11  -4   1  351.16   44.40
 -11  -4   1  333.87   43.40
  11   3  -1   83.19   30.80
  11   3  -1  109.99   29.20
  11   3  -1  134.69   25.40
  11   3  -1  102.09   27.90
  11   3  -1  121.09   24.70
  11   3  -1  117.89   29.60
  11   3  -1  108.79   29.40
  11   3  -1  107.29   23.20
 -11  -3   1  148.09   25.50
 -11  -3   1  116.49   26.10
 -11  -3   1  148.49   28.20
 -11  -3   1  124.59   28.60
 -11  -3   1   51.79   29.90
 -11  -3   1   95.69   22.60
 -11  -3   1  120.79   27.70
  11   2  -1  700.23   40.20
  11   2  -1  646.34   52.79
  11   2  -1  723.63   41.60
  11   2  -1  669.13   41.30
  11   2  -1  685.93   43.60
  11   2  -1  703.93   47.90
  11   2  -1  653.33   50.29
  11   2  -1  701.93   52.49
 -11  -2   1  684.43   59.99
 -11  -2   1  634.64   59.99
 -11  -2   1  715.53   44.00
 -11  -2   1  706.43   43.10
 -11  -2   1  740.13   46.40
 -11  -2   1  694.63   43.80
  11   1  -1   18.10   22.00
  11   1  -1   47.00   20.70
  11   1  -1   22.50   18.60
  11   1  -1   26.90   19.40
  11   1  -1   37.60   24.50
  11   1  -1   53.79   25.20
 -11  -1   1   30.20   24.10
 -11  -1   1   31.40   20.10
 -11  -1   1   35.00   24.80
 -11  -1   1   14.20   23.50
 -11  -1   1   38.60   23.10
 -11  -1   1   18.00   43.90
  11   0  -1  116.69   22.90
  11   0  -1  133.49   24.90
  11   0  -1  127.39   23.00
  11   0  -1  142.09   21.20
  11   0  -1  125.49   25.00
  11   0  -1  100.49   23.80
 -11   0   1  112.99   31.00
 -11   0   1  112.79   23.10
 -11   0   1  107.29   21.60
 -11   0   1  101.89   28.30
 -11   0   1  113.99   24.60
 -11   0   1   97.39   22.50
 -11   0   1  119.19   23.10
 -11   0   1  129.79   30.20
  11  -1  -1   74.19   26.50
  11  -1  -1    0.00   21.40
  11  -1  -1   39.00   20.60
  11  -1  -1   60.99   21.30
  11  -1  -1   50.89   22.20
  11  -1  -1   64.59   31.70
 -11   1   1   11.60   25.60
 -11   1   1   50.89   26.10
 -11   1   1   10.30   19.90
 -11   1   1   -1.30   21.70
 -11   1   1   24.30   23.70
 -11   1   1   26.80   22.40
 -11   1   1   36.60   27.70
 -11   1   1   43.90   20.60
  11  -2  -1  679.53   46.00
  11  -2  -1  716.53   43.00
  11  -2  -1  702.13   43.00
  11  -2  -1  678.93   39.60
  11  -2  -1  690.93   43.00
  11  -2  -1  775.42   48.80
 -11   2   1  727.93   44.10
 -11   2   1  703.23   50.69
 -11   2   1  739.43   43.30
 -11   2   1  607.64   41.40
 -11   2   1  642.34   47.20
 -11   2   1  673.93   45.40
 -11   2   1  700.13   45.70
  11  -3  -1  131.19   17.40
  11  -3  -1   97.09   25.80
  11  -3  -1  101.49   25.20
  11  -3  -1  142.49   26.10
  11  -3  -1   95.49   25.40
 -11   3   1  110.39   31.60
 -11   3   1   99.19   27.00
 -11   3   1  117.39   25.30
 -11   3   1   86.79   27.30
 -11   3   1  121.99   32.30
 -11   3   1  126.29   26.80
  11  -4  -1  320.17   38.40
  11  -4  -1  294.07   40.90
  11  -4  -1  277.47   45.90
  11  -4  -1  322.17   39.40
 -11   4   1  240.28   31.00
 -11   4   1  407.16   49.30
 -11   4   1  291.47   41.80
 -11   4   1  304.67   47.90
 -11   4   1  319.77   39.70
  11  -5  -1   16.00   32.50
  11  -5  -1   19.40   33.80
  11  -5  -1   47.70   27.30
  11  -5  -1   62.79   26.70
  11  -5  -1   33.70   26.10
  11  -5  -1   43.30   27.30
 -11   5   1   54.29   41.80
 -11   5   1   48.80   26.80
 -11   5   1   69.49   28.00
 -11   5   1   32.70   30.10
  12   4  -1  164.38   34.40
  12   4  -1  234.88   38.60
  12   4  -1  177.68   29.40
  12   4  -1  323.17   42.30
  12   4  -1  205.78   33.10
  12   4  -1  184.68   40.50
  12   4  -1  293.87   31.70
 -12  -4   1  255.37   36.20
 -12  -4   1  200.38   32.70
 -12  -4   1  233.08   37.10
 -12  -4   1  230.68   33.30
 -12  -4   1  173.38   45.00
 -12  -4   1  260.47   34.50
  12   3  -1  123.19   26.20
  12   3  -1  135.59   26.80
  12   3  -1  158.58   28.10
  12   3  -1  125.79   30.00
  12   3  -1  125.09   33.70
  12   3  -1   78.29   29.60
  12   3  -1  200.08   35.60
 -12  -3   1  153.48   24.70
 -12  -3   1  128.89   28.10
 -12  -3   1  148.59   29.10
 -12  -3   1  146.89   27.20
 -12  -3   1  159.98   30.00
  12   2  -1  382.66   46.40
  12   2  -1  365.36   37.80
  12   2  -1  335.57   33.70
  12   2  -1  321.87   48.40
  12   2  -1  404.26   46.50
  12   2  -1  330.07   38.40
  12   2  -1  337.47   38.10
 -12  -2   1  347.57   39.80
 -12  -2   1  380.26   40.70
 -12  -2   1  415.76   58.49
 -12  -2   1  369.56   39.90
 -12  -2   1  354.66   40.70
  12   1  -1  196.38   26.50
  12   1  -1  125.19   23.90
  12   1  -1  142.09   23.20
  12   1  -1  134.69   27.00
  12   1  -1  174.18   28.20
 -12  -1   1  231.88   34.30
 -12  -1   1  139.89   26.40
 -12  -1   1  142.69   25.00
 -12  -1   1  216.38   40.60
 -12  -1   1  112.79   31.20
 -12  -1   1  170.08   28.20
  12   0  -1   58.89   23.30
  12   0  -1   74.09   24.40
  12   0  -1   84.99   23.60
  12   0  -1   19.20   23.80
  12   0  -1   74.69   25.10
  12   0  -1   49.70   22.10
 -12   0   1   52.09   28.40
 -12   0   1   58.39   22.40
 -12   0   1   91.29   31.70
 -12   0   1   39.50   28.80
 -12   0   1   83.79   26.90
 -12   0   1   69.39   22.90
 -12   0   1   93.89   24.50
 -12   0   1   97.69   24.30
  12  -1  -1  216.78   33.80
  12  -1  -1  246.28   29.90
  12  -1  -1  205.78   28.30
  12  -1  -1  153.48   24.90
  12  -1  -1  144.89   27.30
  12  -1  -1  217.88   31.00
 -12   1   1  201.68   30.30
 -12   1   1  200.18   29.20
 -12   1   1  164.88   31.00
 -12   1   1  213.48   35.90
 -12   1   1  198.58   29.70
 -12   1   1  141.89   33.40
 -12   1   1  148.99   27.00
 -12   1   1  202.78   27.40
  12  -2  -1  373.26   39.90
  12  -2  -1  360.26   38.60
  12  -2  -1  413.36   39.80
  12  -2  -1  370.86   39.60
  12  -2  -1  348.47   41.40
 -12   2   1  404.36   40.40
 -12   2   1  393.96   36.60
 -12   2   1  313.57   46.70
 -12   2   1  399.16   40.00
 -12   2   1  390.36   47.50
 -12   2   1  341.47   43.10
 -12   2   1  397.76   42.70
  12  -3  -1   88.19   25.90
  12  -3  -1  135.89   18.60
  12  -3  -1  123.69   27.40
  12  -3  -1  176.48   28.80
  12  -3  -1  130.99   27.00
  12  -3  -1   83.89   27.30
 -12   3   1   83.49   28.40
 -12   3   1  162.98   36.60
 -12   3   1  146.79   29.80
 -12   3   1  126.19   29.20
 -12   3   1   74.49   30.00
 -12   3   1  173.98   35.60
  12  -4  -1   86.89   27.30
  12  -4  -1  232.18   40.80
  12  -4  -1  228.48   31.10
  12  -4  -1  143.39   30.30
  12  -4  -1  223.98   30.80
 -12   4   1  280.37   40.90
 -12   4   1  141.99   31.70
 -12   4   1  150.98   29.20
 -12   4   1  181.78   37.10
 -12   4   1  176.98   28.20
 -12   4   1  169.28   30.40
  13   4  -1  763.22   67.99
  13   4  -1  579.44   40.50
  13   4  -1  459.85   44.40
  13   4  -1  460.75   61.09
  13   4  -1  521.75   57.29
  13   4  -1  480.75   51.59
  13   4  -1  572.44   51.99
 -13  -4   1  576.94   48.70
 -13  -4   1  588.64   50.89
 -13  -4   1  510.15   47.60
 -13  -4   1  547.25   75.69
 -13  -4   1  565.84   41.30
  13   3  -1  132.69   31.40
  13   3  -1  155.58   28.60
  13   3  -1  145.99   30.50
  13   3  -1  129.69   45.90
  13   3  -1  234.48   37.40
  13   3  -1  260.37   39.30
  13   3  -1  105.99   26.00
  13   3  -1  218.18   39.10
 -13  -3   1  230.28   32.60
 -13  -3   1  119.09   29.00
 -13  -3   1  211.58   33.30
 -13  -3   1  198.18   32.50
 -13  -3   1  172.98   26.60
 -13  -3   1  123.59   39.40
 -13  -3   1  173.98   29.10
  13   2  -1   52.39   25.00
  13   2  -1   53.89   26.60
  13   2  -1   50.29   26.90
  13   2  -1   28.20   25.10
  13   2  -1   97.59   32.20
  13   2  -1   73.09   30.80
  13   2  -1   62.59   27.90
 -13  -2   1   72.99   28.30
 -13  -2   1   43.50   28.90
 -13  -2   1   60.39   35.70
 -13  -2   1   30.80   27.40
  13   1  -1  622.74   48.50
  13   1  -1  568.74   42.80
  13   1  -1  539.25   38.10
  13   1  -1  502.45   41.50
  13   1  -1  541.85   43.30
  13   1  -1  549.15   47.10
 -13  -1   1  532.25   49.10
 -13  -1   1  552.24   44.70
 -13  -1   1  530.25   41.30
 -13  -1   1  505.05   60.19
 -13  -1   1  511.55   45.70
  13   0  -1   61.09   22.00
  13   0  -1   80.39   25.50
  13   0  -1   87.49   27.90
  13   0  -1   83.59   25.20
  13   0  -1   97.29   25.90
 -13   0   1   72.29   24.20
 -13   0   1  132.29   34.40
 -13   0   1  109.79   27.50
 -13   0   1  131.09   33.50
 -13   0   1   24.90   24.90
 -13   0   1   53.59   25.20
 -13   0   1  113.89   26.80
  13  -1  -1  574.24   42.60
  13  -1  -1  524.85   42.30
  13  -1  -1  604.04   45.70
  13  -1  -1  635.44   45.40
  13  -1  -1  564.04   47.50
 -13   1   1  602.74   41.50
 -13   1   1  499.65   57.89
 -13   1   1  496.75   46.80
 -13   1   1  541.05   43.70
 -13   1   1  597.34   46.20
 -13   1   1  540.65   51.39
 -13   1   1  576.74   45.30
  13  -2  -1   35.90   23.60
  13  -2  -1   54.99   28.80
  13  -2  -1   42.70   25.70
  13  -2  -1   42.70   43.90
  13  -2  -1   63.79   24.50
  13  -2  -1   77.99   26.20
 -13   2   1   21.60   24.90
 -13   2   1   14.60   23.60
 -13   2   1   43.30   34.30
 -13   2   1   18.20   23.00
 -13   2   1   54.89   29.50
 -13   2   1   19.60   29.70
 -13   2   1  101.99   31.90
 -13   2   1   73.79   34.20
  13  -3  -1  199.08   31.30
  13  -3  -1  164.08   21.40
  13  -3  -1  105.89   28.60
  13  -3  -1  142.69   30.30
  13  -3  -1  137.99   27.30
  13  -3  -1  162.68   26.50
  13  -3  -1  121.89   29.20
 -13   3   1  133.79   30.90
 -13   3   1  134.29   34.60
 -13   3   1  119.59   27.60
 -13   3   1  175.78   35.50
 -13   3   1  178.28   36.70
  13  -4  -1  582.74   47.00
  13  -4  -1  448.86   64.49
  13  -4  -1  435.16   47.90
  13  -4  -1  524.85   55.09
 -13   4   1  514.55   74.59
 -13   4   1  619.94   77.59
 -13   4   1  419.66   64.39
 -13   4   1  624.44   47.80
 -13   4   1  590.74   49.90
  14   3  -1  209.18   40.60
  14   3  -1   41.60   27.70
  14   3  -1   35.50   55.69
  14   3  -1  196.58   38.80
  14   3  -1   95.59   30.40
  14   3  -1  113.79   28.40
  14   3  -1   88.29   28.70
 -14  -3   1  135.89   27.20
 -14  -3   1   85.19   28.60
 -14  -3   1   32.40   45.60
 -14  -3   1  151.88   29.60
 -14  -3   1   69.99   33.10
 -14  -3   1   64.09   30.80
 -14  -3   1   73.69   29.00
  14   2  -1   36.70   24.20
  14   2  -1  109.59   34.00
  14   2  -1   59.99   26.10
  14   2  -1   63.09   25.50
  14   2  -1  136.69   34.00
  14   2  -1   82.69   26.50
 -14  -2   1  119.19   31.70
 -14  -2   1  115.09   31.30
 -14  -2   1   92.89   29.30
 -14  -2   1   94.19   31.30
 -14  -2   1   41.80   33.50
 -14  -2   1  139.09   32.80
  14   1  -1  634.94   47.90
  14   1  -1  576.14   66.79
  14   1  -1  629.54   41.80
  14   1  -1  737.33   48.40
  14   1  -1  619.94   45.80
  14   1  -1  644.74   52.09
  14   1  -1  654.13   52.99
 -14  -1   1  659.93   49.80
 -14  -1   1  607.44   53.39
 -14  -1   1  677.53   48.80
 -14  -1   1  700.23   53.09
 -14  -1   1  648.04   44.10
 -14  -1   1  612.44   44.50
  14   0  -1  360.16   40.80
  14   0  -1  374.96   40.40
  14   0  -1  384.86   45.30
  14   0  -1  368.56   40.00
  14   0  -1  363.96   43.30
 -14   0   1  387.46   45.00
 -14   0   1  419.66   50.19
 -14   0   1  362.36   38.90
 -14   0   1  348.57   59.59
 -14   0   1  347.17   39.10
 -14   0   1  369.26   41.40
 -14   0   1  357.96   48.20
  14  -1  -1  429.06   76.49
  14  -1  -1  648.84   46.30
  14  -1  -1  631.84   46.30
  14  -1  -1  661.53   45.40
  14  -1  -1  714.93   49.60
  14  -1  -1  663.33   46.60
 -14   1   1  751.22   57.49
 -14   1   1  602.94   49.10
 -14   1   1  685.93   49.30
 -14   1   1  613.74   53.19
 -14   1   1  675.83   48.20
 -14   1   1  648.74   47.00
  14  -2  -1  116.19   30.00
  14  -2  -1   69.89   29.70
  14  -2  -1   51.99   25.70
  14  -2  -1   63.49   27.00
  14  -2  -1   85.09   28.60
  14  -2  -1  140.39   30.90
 -14   2   1   93.19   30.00
 -14   2   1  134.69   33.30
 -14   2   1  112.79   32.00
 -14   2   1   71.89   30.00
 -14   2   1   82.89   32.30
 -14   2   1   30.40   28.50
 -14   2   1  100.19   30.10
 -14   2   1  119.09   34.30
  14  -3  -1   97.09   29.60
  14  -3  -1   87.99   26.50
  14  -3  -1   59.49   30.10
  14  -3  -1   77.59   20.70
  14  -3  -1   76.19   29.20
  14  -3  -1  101.79   19.30
 -14   3   1   31.10   28.70
 -14   3   1  124.89   36.00
 -14   3   1   58.09   31.40
 -14   3   1   35.30   30.50
 -14   3   1  126.99   37.50
 -14   3   1  123.39   33.00
  15   3  -1  202.28   38.40
  15   3  -1  183.18   51.79
  15   3  -1  274.97   40.80
  15   3  -1  220.48   37.40
  15   3  -1  409.86   58.39
 -15  -3   1  253.27   38.60
 -15  -3   1  249.88   49.99
 -15  -3   1  228.58   36.40
 -15  -3   1  330.47   40.70
 -15  -3   1  222.78   30.70
 -15  -3   1  155.38   33.70
  15   2  -1   41.70   26.90
  15   2  -1   88.29   37.60
  15   2  -1   36.80   27.30
  15   2  -1  101.49   35.00
  15   2  -1   53.49   35.30
  15   2  -1   54.59   28.00
 -15  -2   1   18.20   45.30
 -15  -2   1   44.00   46.90
 -15  -2   1   81.09   32.50
 -15  -2   1   51.49   30.30
 -15  -2   1   89.19   31.60
 -15  -2   1   15.60   27.20
  15   1  -1  -13.00   23.40
  15   1  -1    4.50   42.30
  15   1  -1   28.90   35.40
  15   1  -1   -9.60   25.20
  15   1  -1   67.89   32.50
  15   1  -1   14.40   24.80
 -15  -1   1   52.49   30.90
 -15  -1   1   25.20   26.60
 -15  -1   1   33.60   30.70
 -15  -1   1   39.80   31.30
 -15  -1   1   27.10   26.20
 -15  -1   1   19.00   29.50
 -15  -1   1    2.60   36.70
  15   0  -1  343.17   35.00
  15   0  -1  268.57   37.20
  15   0  -1  340.37   50.89
  15   0  -1  296.57   39.00
  15   0  -1  366.26   45.90
  15   0  -1  262.97   43.40
  15   0  -1  328.67   46.20
 -15   0   1  351.96   49.40
 -15   0   1  345.87   49.00
 -15   0   1  362.46   44.90
 -15   0   1  334.67   41.50
 -15   0   1  346.77   45.70
 -15   0   1  279.47   47.90
 -15   0   1  316.77   47.40
  15  -1  -1    2.50   23.60
  15  -1  -1  -31.70   24.30
  15  -1  -1    4.80   27.70
  15  -1  -1   21.70   25.70
  15  -1  -1   12.20   29.30
  15  -1  -1    6.10   26.40
  15  -1  -1   37.40   27.50
 -15   1   1   17.80   30.10
 -15   1   1   49.30   34.50
 -15   1   1   30.10   28.50
 -15   1   1   47.00   35.80
 -15   1   1   29.90   26.80
 -15   1   1   12.90   26.00
 -15   1   1   10.00   26.40
 -15   1   1    6.20   30.90
  15  -2  -1   55.29   25.50
  15  -2  -1   44.90   29.40
  15  -2  -1    9.50   28.00
  15  -2  -1   40.00   41.30
  15  -2  -1   51.29   30.00
  15  -2  -1   87.29   31.00
  15  -2  -1   48.50   27.40
 -15   2   1   75.59   32.50
 -15   2   1   74.89   34.60
 -15   2   1   23.80   31.20
 -15   2   1   69.69   32.00
 -15   2   1   54.39   31.50
 -15   2   1  128.89   51.29
 -15   2   1   15.00   43.20
 -15   2   1    7.10   25.60
  15  -3  -1  245.28   35.40
  15  -3  -1  317.37   45.60
  15  -3  -1  226.88   29.60
  15  -3  -1  243.98   32.10
 -15   3   1  300.57   47.20
 -15   3   1  171.28   33.40
 -15   3   1  181.28   36.80
 -15   3   1  250.17   37.40
  16   2  -1   79.69   37.70
  16   2  -1   35.00   37.40
  16   2  -1  -12.90   28.50
  16   2  -1  138.89   70.79
 -16  -2   1   11.50   29.90
 -16  -2   1   49.10   32.50
 -16  -2   1   13.10   28.30
 -16  -2   1    4.10   30.20
  16   1  -1  147.99   36.00
  16   1  -1  123.19   30.60
  16   1  -1   83.39   27.60
  16   1  -1  147.89   32.00
  16   1  -1  235.18   39.00
  16   1  -1  192.58   37.50
  16   1  -1  248.18   39.90
 -16  -1   1  112.59   30.60
 -16  -1   1  113.69   30.10
 -16  -1   1  132.39   33.60
 -16  -1   1  146.09   34.30
 -16  -1   1  147.39   34.70
 -16  -1   1  136.49   65.39
  16   0  -1   -7.00   28.80
  16   0  -1   40.70   43.40
  16   0  -1   57.89   32.80
  16   0  -1  -46.40   25.00
  16   0  -1  -16.10   27.40
  16   0  -1    3.60   26.50
 -16   0   1    6.30   31.40
 -16   0   1   21.90   30.70
 -16   0   1   31.10   29.00
 -16   0   1   20.60   28.20
 -16   0   1   -0.30   31.50
 -16   0   1  -49.50   43.10
 -16   0   1   13.90   28.30
  16  -1  -1  149.79   32.00
  16  -1  -1  118.49   32.80
  16  -1  -1   98.69   38.30
  16  -1  -1  107.69   31.30
  16  -1  -1  224.68   39.20
  16  -1  -1  137.29   30.10
 -16   1   1   88.59   31.60
 -16   1   1  108.09   31.30
 -16   1   1  143.79   38.30
 -16   1   1  147.19   39.00
 -16   1   1  223.18   42.00
 -16   1   1   77.79   30.20
 -16   1   1   97.39   44.00
 -16   1   1   83.69   43.20
  16  -2  -1   -0.60   30.20
  16  -2  -1   58.49   35.10
  16  -2  -1    5.50   27.10
  16  -2  -1  -49.60   26.40
  16  -2  -1  -14.90   28.00
 -16   2   1   29.10   32.70
 -16   2   1    4.10   36.00
 -16   2   1  -29.10   28.50
 -16   2   1   -1.60   37.00
 -16   2   1   -3.50   29.70
 -16   2   1    8.60   31.20
 -15   2  -2   32.80   33.80
 -15   2  -2   40.50   35.60
 -15   2  -2    7.60   30.30
 -15   2  -2    2.20   44.50
 -15   2  -2  -25.60   26.30
 -15   2  -2  -58.49   36.40
 -15   2  -2  -40.30   41.10
 -15   2  -2    1.80   29.70
  15  -2   2  -17.00   23.60
  15  -2   2    0.30   23.10
  15  -2   2  -35.00   24.30
  15  -2   2   27.10   30.70
  15  -2   2   32.00   37.10
  15  -2   2   64.59   31.90
 -15   1  -2   70.19   43.60
 -15   1  -2   79.89   30.60
 -15   1  -2   68.89   32.50
 -15   1  -2   65.59   38.60
 -15   1  -2   59.69   27.80
 -15   1  -2   77.39   34.50
  15  -1   2   31.10   38.90
  15  -1   2   68.69   32.50
  15  -1   2  103.59   32.70
  15  -1   2  112.39   33.30
  15  -1   2   20.70   28.00
  15  -1   2  108.09   30.40
  15  -1   2  137.59   26.10
 -15   0  -2   24.70   26.70
 -15   0  -2   -0.80   31.30
 -15   0  -2  -51.39   54.29
 -15   0  -2    5.30   29.80
 -15   0  -2    0.30   28.70
 -15   0  -2   -4.40   33.90
 -15   0  -2   10.80   35.70
  15   0   2   50.99   30.40
  15   0   2  -16.10   26.80
  15   0   2   20.80   22.30
  15   0   2    5.50   30.60
  15   0   2  104.29   35.00
  15   0   2   32.30   37.30
  15   0   2  -22.80   23.70
 -15  -1  -2   15.70   38.30
 -15  -1  -2   93.69   37.80
 -15  -1  -2   82.89   30.50
 -15  -1  -2   99.09   32.90
 -15  -1  -2   67.09   37.90
 -15  -1  -2   63.39   30.80
  15   1   2   44.50   29.00
  15   1   2   62.29   25.60
  15   1   2  106.09   32.60
  15   1   2   79.09   30.50
  15   1   2   20.70   28.10
  15   1   2  136.29   38.90
 -15  -2  -2   -5.40   33.50
 -15  -2  -2  -18.50   40.60
 -15  -2  -2   22.70   32.50
 -15  -2  -2  -23.60   32.10
 -15  -2  -2   12.50   33.30
 -15  -2  -2   33.20   30.30
  15   2   2   -2.50   30.00
  15   2   2   -7.90   23.60
  15   2   2   10.80   28.80
  15   2   2   20.20   32.20
  15   2   2  113.09   38.30
 -14   3  -2   26.70   34.60
 -14   3  -2  -18.60   26.30
 -14   3  -2   12.20   32.90
 -14   3  -2   85.79   38.80
 -14   3  -2  -10.90   29.80
 -14   3  -2   86.19   31.30
  14  -3   2  -33.20   25.90
  14  -3   2   68.79   30.40
  14  -3   2   76.79   30.10
  14  -3   2  -41.50   24.40
  14  -3   2   54.09   37.20
 -14   2  -2  130.19   32.10
 -14   2  -2  120.39   49.20
 -14   2  -2   77.59   29.80
 -14   2  -2   85.99   26.80
 -14   2  -2   80.79   51.19
 -14   2  -2  157.08   33.30
 -14   2  -2   54.29   31.00
  14  -2   2   98.79   28.30
  14  -2   2  152.48   43.20
  14  -2   2   74.69   30.10
  14  -2   2  103.79   30.00
  14  -2   2  160.88   26.20
 -14   1  -2    9.60   24.30
 -14   1  -2   -2.20   32.70
 -14   1  -2   48.50   29.70
 -14   1  -2   41.10   29.40
 -14   1  -2   28.20   33.80
 -14   1  -2    1.90   30.90
 -14   1  -2   28.20   30.10
  14  -1   2   35.50   33.80
  14  -1   2   64.29   29.80
  14  -1   2   58.39   23.70
  14  -1   2   26.10   25.00
  14  -1   2    6.60   25.40
 -14   0  -2  363.56   45.70
 -14   0  -2  300.47   38.80
 -14   0  -2  245.58   43.60
 -14   0  -2  365.76   39.90
 -14   0  -2  306.17   43.40
 -14   0  -2  264.27   35.00
  14   0   2  281.07   36.40
  14   0   2  288.57   40.90
  14   0   2  429.26   48.40
  14   0   2  344.07   34.50
  14   0   2  430.36   49.20
  14   0   2  341.17   44.40
 -14  -1  -2  -30.00   37.20
 -14  -1  -2   45.70   34.70
 -14  -1  -2   25.40   28.90
 -14  -1  -2    4.30   28.40
 -14  -1  -2   33.50   28.10
  14   1   2   -2.80   22.40
  14   1   2   55.69   33.00
  14   1   2   25.30   39.20
  14   1   2   -2.30   24.90
  14   1   2   61.89   37.80
  14   1   2   19.10   21.40
  14   1   2   30.90   30.00
 -14  -2  -2  111.59   33.10
 -14  -2  -2  166.78   36.90
 -14  -2  -2  117.69   33.70
 -14  -2  -2   39.00   33.70
 -14  -2  -2   95.19   48.20
 -14  -2  -2   53.29   28.50
  14   2   2  189.58   38.50
  14   2   2  144.59   49.30
  14   2   2   54.39   26.40
  14   2   2   96.09   26.30
  14   2   2   57.39   25.70
  14   2   2  143.79   61.09
  14   2   2  151.48   38.90
 -14  -3  -2   60.29   33.00
 -14  -3  -2   77.79   34.90
 -14  -3  -2    7.90   42.90
 -14  -3  -2   34.80   29.70
 -14  -3  -2   75.39   30.40
  14   3   2   88.39   62.59
  14   3   2  132.59   43.40
  14   3   2   -3.30   26.40
  14   3   2   61.09   29.30
  14   3   2  116.19   41.60
  14   3   2   79.89   46.60
 -13   3  -2  210.38   40.30
 -13   3  -2  193.48   32.40
 -13   3  -2  200.38   36.50
 -13   3  -2  180.08   34.00
 -13   3  -2  149.09   37.10
 -13   3  -2  101.79   27.80
  13  -3   2  198.08   28.40
  13  -3   2  196.38   31.00
  13  -3   2  132.29   34.00
  13  -3   2  164.08   30.50
  13  -3   2   94.89   28.80
 -13   2  -2  106.29   28.00
 -13   2  -2  105.39   29.90
 -13   2  -2   76.49   30.10
 -13   2  -2  129.09   27.40
 -13   2  -2  132.69   36.70
 -13   2  -2  154.78   37.30
  13  -2   2  111.39   26.40
  13  -2   2  184.78   25.70
  13  -2   2  162.48   29.70
  13  -2   2  132.79   26.70
  13  -2   2   71.39   25.40
  13  -2   2   73.99   25.80
 -13   1  -2  600.14   45.70
 -13   1  -2  526.65   50.59
 -13   1  -2  490.75   47.70
 -13   1  -2  586.54   43.00
 -13   1  -2  538.25   50.29
 -13   1  -2  509.65   39.80
 -13   1  -2  565.64   53.19
  13  -1   2  569.64   43.50
  13  -1   2  533.65   37.80
  13  -1   2  596.44   50.09
  13  -1   2  627.94   47.20
  13  -1   2  480.45   38.50
  13  -1   2  545.85   43.60
 -13   0  -2  366.16   49.99
 -13   0  -2  314.77   60.79
 -13   0  -2  367.86   39.10
 -13   0  -2  371.26   37.50
 -13   0  -2  367.06   46.50
  13   0   2  387.96   45.60
  13   0   2  308.77   39.80
  13   0   2  344.47   38.70
  13   0   2  428.36   41.40
  13   0   2  386.06   43.30
  13   0   2  331.17   44.10
  13   0   2  348.77   33.20
 -13  -1  -2  561.74   46.00
 -13  -1  -2  544.65   43.20
 -13  -1  -2  569.74   48.80
 -13  -1  -2  532.25   41.50
 -13  -1  -2  551.44   52.49
  13   1   2  560.14   43.10
  13   1   2  542.95   37.40
  13   1   2  644.74   51.29
  13   1   2  403.66   48.20
  13   1   2  506.25   38.90
  13   1   2  482.85   46.50
  13   1   2  624.34   52.09
 -13  -2  -2  184.48   33.50
 -13  -2  -2  150.48   42.20
 -13  -2  -2  124.89   31.00
 -13  -2  -2  130.39   32.00
 -13  -2  -2  168.38   34.90
 -13  -2  -2  156.18   30.70
  13   2   2   79.49   29.50
  13   2   2  130.39   32.90
  13   2   2  104.09   25.20
  13   2   2  190.78   37.40
  13   2   2  105.49   26.10
  13   2   2  154.78   29.40
  13   2   2  192.98   34.30
 -13  -3  -2  153.28   31.40
 -13  -3  -2  145.59   30.80
 -13  -3  -2  128.89   50.29
 -13  -3  -2  164.58   33.50
 -13  -3  -2  127.39   32.10
 -13  -3  -2  182.08   33.90
  13   3   2  151.98   38.70
  13   3   2  127.09   36.90
  13   3   2   94.89   27.20
  13   3   2  126.39   28.70
  13   3   2  191.18   33.00
  13   3   2  201.98   37.40
  13   3   2  233.98   37.30
  13   3   2  153.48   30.80
 -12   4  -2  338.67   40.80
 -12   4  -2  408.66   56.29
 -12   4  -2  385.46   49.00
 -12   4  -2  289.97   46.00
 -12   4  -2  413.66   47.10
  12  -4   2  386.96   42.90
  12  -4   2  421.96   58.79
  12  -4   2  255.37   45.10
  12  -4   2  315.27   41.70
 -12   3  -2  151.28   27.30
 -12   3  -2  146.59   28.90
 -12   3  -2  199.78   31.60
 -12   3  -2  217.08   40.10
 -12   3  -2  137.69   34.60
 -12   3  -2  218.28   33.90
 -12   3  -2  217.98   31.10
  12  -3   2  142.49   31.90
  12  -3   2  167.08   27.60
  12  -3   2  124.19   26.10
  12  -3   2  199.68   29.30
  12  -3   2  194.18   28.50
 -12   2  -2    6.40   24.60
 -12   2  -2    9.60   33.40
 -12   2  -2    5.90   25.50
 -12   2  -2    0.10   24.60
 -12   2  -2   -4.60   25.20
 -12   2  -2   -6.60   26.70
 -12   2  -2   -1.20   22.90
  12  -2   2   14.90   19.90
  12  -2   2  -12.80   21.00
  12  -2   2   24.30   25.40
  12  -2   2   15.00   25.00
  12  -2   2    8.30   20.00
  12  -2   2   37.00   28.60
 -12   1  -2  122.49   24.80
 -12   1  -2  204.68   29.70
 -12   1  -2  241.48   39.10
 -12   1  -2  114.59   30.60
 -12   1  -2  155.38   28.40
 -12   1  -2  130.19   31.80
 -12   1  -2  128.49   25.10
 -12   1  -2  194.88   30.80
  12  -1   2  115.19   27.40
  12  -1   2  201.48   30.10
  12  -1   2  143.59   27.20
  12  -1   2  194.48   27.20
  12  -1   2  145.89   25.60
  12  -1   2  217.18   26.50
  12  -1   2  169.58   26.50
 -12   0  -2   20.30   30.60
 -12   0  -2   59.89   27.00
 -12   0  -2   41.60   37.40
 -12   0  -2   96.09   44.00
 -12   0  -2   12.60   24.80
 -12   0  -2   24.70   24.50
 -12   0  -2   48.20   24.60
  12   0   2   75.79   28.20
  12   0   2   21.30   20.60
  12   0   2   44.30   25.90
  12   0   2   25.70   24.30
  12   0   2   34.50   25.60
  12   0   2   49.70   20.70
 -12  -1  -2  183.08   29.50
 -12  -1  -2  173.08   38.40
 -12  -1  -2  106.49   45.90
 -12  -1  -2  202.88   32.40
 -12  -1  -2  158.78   32.00
 -12  -1  -2  149.99   25.90
  12   1   2  176.98   26.80
  12   1   2  187.88   30.00
  12   1   2  253.87   36.00
  12   1   2  183.18   42.40
  12   1   2  164.28   24.40
  12   1   2  177.28   27.10
  12   1   2  220.28   33.90
 -12  -2  -2   18.80   28.30
 -12  -2  -2   18.80   25.60
 -12  -2  -2   26.30   26.90
 -12  -2  -2   -0.40   27.00
 -12  -2  -2   -4.80   34.60
 -12  -2  -2   45.30   26.90
  12   2   2    5.40   29.80
  12   2   2   10.60   22.10
  12   2   2   20.20   24.90
  12   2   2   29.30   29.20
  12   2   2  -15.10   22.40
  12   2   2   12.80   22.10
  12   2   2  -12.50   30.80
 -12  -3  -2  205.18   33.10
 -12  -3  -2  162.58   32.00
 -12  -3  -2  166.68   33.70
 -12  -3  -2  140.19   28.70
 -12  -3  -2  116.39   40.70
 -12  -3  -2  236.28   35.00
  12   3   2  250.07   40.50
  12   3   2  155.08   29.20
  12   3   2  108.39   24.80
  12   3   2  202.38   34.20
  12   3   2  173.88   30.10
  12   3   2  116.79   31.20
  12   3   2  165.18   34.10
 -12  -4  -2  474.65   50.79
 -12  -4  -2  376.96   53.69
 -12  -4  -2  377.46   51.99
 -12  -4  -2  263.97   52.59
 -12  -4  -2  357.86   43.10
 -12  -4  -2  417.06   48.50
  12   4   2  351.86   47.10
  12   4   2  362.06   57.79
  12   4   2  245.68   38.10
  12   4   2  634.54   93.39
 -11   4  -2  101.49   26.40
 -11   4  -2  154.68   37.80
 -11   4  -2  143.29   33.20
 -11   4  -2   83.89   26.70
 -11   4  -2  167.08   33.10
 -11   4  -2  134.09   28.50
 -11   4  -2  107.79   28.00
  11  -4   2  105.19   24.90
  11  -4   2   77.19   24.80
  11  -4   2   88.69   23.80
  11  -4   2   89.49   30.80
  11  -4   2  110.49   27.30
 -11   3  -2  167.08   28.50
 -11   3  -2  142.39   25.50
 -11   3  -2  136.69   32.50
 -11   3  -2  215.58   32.70
 -11   3  -2  238.08   39.80
 -11   3  -2  203.28   38.50
  11  -3   2  171.18   26.10
  11  -3   2  184.28   18.30
  11  -3   2  217.38   37.70
  11  -3   2  115.59   24.80
  11  -3   2  184.38   26.90
  11  -3   2  188.48   46.20
 -11   2  -2  269.17   36.80
 -11   2  -2  235.18   34.70
 -11   2  -2  273.17   34.70
 -11   2  -2  238.98   29.70
 -11   2  -2  257.07   36.80
 -11   2  -2  241.68   37.90
 -11   2  -2  232.38   29.70
  11  -2   2  253.67   36.90
  11  -2   2  251.87   37.10
  11  -2   2  177.18   25.40
  11  -2   2  230.58   28.50
  11  -2   2  254.47   42.30
 -11   1  -2  192.18   27.20
 -11   1  -2  191.98   36.00
 -11   1  -2  167.58   28.00
 -11   1  -2  161.28   34.60
 -11   1  -2   88.29   23.00
 -11   1  -2  168.78   33.20
 -11   1  -2  137.69   26.70
  11  -1   2  164.68   23.80
  11  -1   2  167.98   25.30
  11  -1   2  155.48   27.40
  11  -1   2  192.48   34.30
  11  -1   2  131.59   23.60
  11  -1   2  118.09   24.30
  11  -1   2  121.89   38.40
 -11   0  -2   70.89   27.60
 -11   0  -2   82.39   24.50
 -11   0  -2   72.79   23.70
 -11   0  -2  139.29   27.60
 -11   0  -2  123.19   35.40
  11   0   2   98.99   30.20
  11   0   2   77.39   24.40
  11   0   2  104.59   27.40
  11   0   2  139.69   21.90
  11   0   2   88.49   21.00
  11   0   2  130.09   28.90
  11   0   2   97.69   24.70
 -11  -1  -2  154.48   27.90
 -11  -1  -2  113.09   33.70
 -11  -1  -2  213.98   38.20
 -11  -1  -2  172.08   27.80
 -11  -1  -2  144.89   28.40
  11   1   2  184.78   26.30
  11   1   2  119.99   42.40
  11   1   2  160.68   30.40
  11   1   2  124.29   27.30
  11   1   2  166.18   28.30
 -11  -2  -2  195.18   38.50
 -11  -2  -2  273.87   33.90
 -11  -2  -2  202.88   30.10
 -11  -2  -2  248.48   39.90
 -11  -2  -2  162.68   28.70
  11   2   2  209.98   32.70
  11   2   2  267.87   35.90
  11   2   2  229.78   32.60
  11   2   2  130.19   26.10
  11   2   2  283.57   36.50
  11   2   2  200.18   28.20
  11   2   2  182.18   28.80
 -11  -3  -2  161.18   28.40
 -11  -3  -2  107.79   34.80
 -11  -3  -2  203.48   32.90
 -11  -3  -2  156.88   29.00
 -11  -3  -2  193.08   32.60
 -11  -3  -2  187.58   28.50
 -11  -3  -2  175.48   30.30
  11   3   2  213.38   35.90
  11   3   2  229.08   38.00
  11   3   2  215.18   37.90
  11   3   2  134.99   30.00
  11   3   2  256.77   44.00
  11   3   2  113.79   24.40
  11   3   2  149.19   26.30
 -11  -4  -2  117.59   26.20
 -11  -4  -2  145.69   28.90
 -11  -4  -2  107.39   29.70
 -11  -4  -2   81.69   39.70
 -11  -4  -2  237.28   37.60
 -11  -4  -2  125.09   31.40
 -11  -4  -2  118.39   30.40
  11   4   2  195.28   38.10
  11   4   2  124.59   28.00
  11   4   2  153.28   35.00
  11   4   2   67.29   24.10
  11   4   2  187.28   40.80
  11   4   2   84.39   34.20
 -10   5  -2   64.39   33.10
 -10   5  -2   29.10   37.40
 -10   5  -2  -40.90   25.40
 -10   5  -2   47.30   24.30
 -10   5  -2    3.30   24.30
 -10   5  -2  -41.10   25.50
  10  -5   2   18.70   23.60
  10  -5   2   23.30   25.40
  10  -5   2   25.60   22.60
  10  -5   2   10.70   26.80
  10  -5   2   34.80   25.60
 -10   4  -2   -0.40   23.30
 -10   4  -2    6.10   23.00
 -10   4  -2    9.00   34.70
 -10   4  -2  -17.60   22.20
 -10   4  -2   19.50   22.90
 -10   4  -2   28.80   30.20
 -10   4  -2   49.10   30.50
  10  -4   2   14.80   21.60
  10  -4   2   15.00   29.20
  10  -4   2   25.60   22.90
  10  -4   2  -13.20   22.80
  10  -4   2   20.80   21.50
 -10   3  -2  193.58   27.80
 -10   3  -2  272.07   34.90
 -10   3  -2  144.09   24.20
 -10   3  -2  223.88   35.90
 -10   3  -2  173.68   29.50
 -10   3  -2  240.98   34.10
 -10   3  -2  267.97   38.30
  10  -3   2  220.58   27.10
  10  -3   2  146.89   24.50
  10  -3   2  235.28   33.40
  10  -3   2  160.18   28.00
  10  -3   2  228.38   27.10
 -10   2  -2  405.86   38.70
 -10   2  -2  424.06   45.10
 -10   2  -2  384.76   37.60
 -10   2  -2  403.76   36.20
 -10   2  -2  397.16   34.90
 -10   2  -2  456.95   38.50
  10  -2   2  406.66   43.50
  10  -2   2  446.56   37.00
  10  -2   2  435.26   38.60
  10  -2   2  405.86   42.00
  10  -2   2  427.96   29.40
 -10   1  -2   34.70   26.30
 -10   1  -2   75.89   21.50
 -10   1  -2   73.39   19.90
 -10   1  -2   81.29   30.30
 -10   1  -2   35.60   19.10
 -10   1  -2   33.40   24.20
 -10   1  -2   35.00   20.50
 -10   1  -2   62.19   23.30
  10  -1   2   47.90   20.70
  10  -1   2   77.29   20.60
  10  -1   2   48.10   21.70
  10  -1   2   77.29   21.00
  10  -1   2   81.59   23.00
  10  -1   2   42.70   19.30
  10  -1   2   49.10   20.60
 -10   0  -2   39.00   26.00
 -10   0  -2  -16.00   21.80
 -10   0  -2   -8.50   20.10
 -10   0  -2    3.10   27.30
 -10   0  -2   17.40   20.50
 -10   0  -2    3.30   18.50
  10   0   2    0.10   17.10
  10   0   2   -8.00   20.60
  10   0   2    1.00   17.20
  10   0   2   -7.20   21.60
  10   0   2    4.50   17.10
  10   0   2   -9.70   20.10
  10   0   2   -4.50   19.60
 -10  -1  -2   60.09   24.40
 -10  -1  -2   48.10   22.70
 -10  -1  -2   21.10   22.90
 -10  -1  -2   52.59   23.00
 -10  -1  -2   77.79   22.80
 -10  -1  -2   69.19   25.10
  10   1   2   93.39   21.10
  10   1   2   63.19   22.30
  10   1   2   28.60   21.70
  10   1   2   70.69   26.50
  10   1   2   63.29   21.00
  10   1   2   68.79   19.70
  10   1   2   92.39   26.80
 -10  -2  -2  466.35   40.70
 -10  -2  -2  461.45   42.80
 -10  -2  -2  365.26   54.79
 -10  -2  -2  430.46   37.70
 -10  -2  -2  449.16   36.20
 -10  -2  -2  470.15   39.20
  10   2   2  399.16   44.80
  10   2   2  436.76   44.70
  10   2   2  394.46   46.90
  10   2   2  406.06   33.00
  10   2   2  416.46   36.00
  10   2   2  468.15   37.60
  10   2   2  375.06   45.00
  10   2   2  424.66   39.70
 -10  -3  -2  235.98   35.80
 -10  -3  -2  216.78   29.00
 -10  -3  -2  214.38   40.80
 -10  -3  -2  187.38   30.10
 -10  -3  -2  198.38   29.90
 -10  -3  -2  263.07   30.90
 -10  -3  -2  195.78   34.10
  10   3   2  234.78   35.90
  10   3   2  163.48   32.40
  10   3   2  249.88   36.40
  10   3   2  174.98   29.50
  10   3   2  290.57   38.80
  10   3   2  208.38   31.30
  10   3   2  178.68   32.30
 -10  -4  -2   29.40   26.70
 -10  -4  -2   21.20   23.00
 -10  -4  -2   23.10   26.20
 -10  -4  -2  -15.90   20.90
 -10  -4  -2   -2.80   28.80
 -10  -4  -2   10.50   32.80
 -10  -4  -2   31.30   28.00
  10   4   2  -16.90   24.10
  10   4   2  -25.10   28.30
  10   4   2   24.90   29.80
  10   4   2   -4.00   30.80
  10   4   2  -16.10   23.40
 -10  -5  -2  108.89   36.70
 -10  -5  -2   13.40   18.30
 -10  -5  -2   65.69   52.59
 -10  -5  -2   27.90   30.30
 -10  -5  -2   53.69   30.10
 -10  -5  -2   28.70   33.60
 -10  -5  -2   59.79   44.10
  10   5   2    9.10   26.70
  10   5   2   49.30   35.20
  10   5   2   16.60   31.00
  10   5   2   18.70   27.50
  10   5   2   56.79   34.00
  10   5   2   36.70   37.20
  -9   5  -2  168.28   27.20
  -9   5  -2  150.28   40.60
  -9   5  -2  126.09   25.50
  -9   5  -2   -6.70   43.50
  -9   5  -2   87.29   39.20
   9  -5   2   82.99   23.70
   9  -5   2  103.49   30.70
   9  -5   2  125.09   24.10
   9  -5   2  109.99   44.60
  -9   4  -2    9.60   21.70
  -9   4  -2   35.90   28.70
  -9   4  -2   33.60   23.50
  -9   4  -2   11.80   30.20
  -9   4  -2   -0.50   26.90
  -9   4  -2   11.30   27.90
  -9   4  -2   -9.20   26.00
   9  -4   2   -9.50   20.90
   9  -4   2  -16.20   23.40
   9  -4   2  -16.40   21.90
   9  -4   2    6.90   20.10
   9  -4   2   17.80   20.30
  -9   3  -2 1093.09   47.80
  -9   3  -2 1007.00   48.50
  -9   3  -2 1042.20   47.40
  -9   3  -2 1085.39   58.89
  -9   3  -2 1091.09   50.29
  -9   3  -2 1062.69   51.49
  -9   3  -2 1120.09   70.79
   9  -3   2 1043.10   47.90
   9  -3   2 1095.69   48.90
   9  -3   2 1113.29   48.70
   9  -3   2 1047.30   54.89
   9  -3   2 1098.79   47.50
  -9   2  -2 2145.99   71.29
  -9   2  -2 2288.47   81.29
  -9   2  -2 2115.49   70.59
  -9   2  -2 2118.79   71.69
  -9   2  -2 2222.58   79.59
  -9   2  -2 2173.38   73.99
   9  -2   2 2233.88   72.69
   9  -2   2 2187.28   71.69
   9  -2   2 2260.07   72.49
   9  -2   2 2177.78   66.99
   9  -2   2 2256.67   79.39
   9  -2   2 2175.08   71.79
  -9   1  -2  271.57   37.00
  -9   1  -2  272.47   26.00
  -9   1  -2  220.38   30.20
  -9   1  -2  290.37   26.80
  -9   1  -2  288.77   37.40
  -9   1  -2  301.37   32.80
  -9   1  -2  253.87   31.50
   9  -1   2  304.67   36.40
   9  -1   2  226.08   28.50
   9  -1   2  293.97   28.90
   9  -1   2  255.67   28.70
   9  -1   2  277.97   27.00
   9  -1   2  242.88   30.40
   9  -1   2  288.77   35.10
  -9   0  -2 1691.13   59.89
  -9   0  -2 1792.42   60.29
  -9   0  -2 1685.63   72.09
  -9   0  -2 1691.93   60.19
  -9   0  -2 1802.12   61.89
  -9   0  -2 1840.92   58.79
  -9   0  -2 1691.93   66.99
   9   0   2 1602.84   61.99
   9   0   2 1796.32   62.39
   9   0   2 1784.02   58.29
   9   0   2 1771.02   62.69
   9   0   2 1811.72   56.89
   9   0   2 1678.63   65.19
   9   0   2 1667.73   58.59
  -9  -1  -2  287.57   32.00
  -9  -1  -2  247.88   34.70
  -9  -1  -2  291.17   45.20
  -9  -1  -2  252.97   31.10
  -9  -1  -2  236.18   33.00
  -9  -1  -2  249.08   34.40
   9   1   2  279.07   33.60
   9   1   2  318.27   27.30
   9   1   2  271.97   35.60
   9   1   2  244.78   32.10
   9   1   2  307.67   30.00
   9   1   2  278.67   29.20
   9   1   2  262.07   35.50
  -9  -2  -2 2221.58   72.79
  -9  -2  -2 2280.67   75.49
  -9  -2  -2 1957.00   88.99
  -9  -2  -2 2289.27   75.09
  -9  -2  -2 2211.68   76.29
  -9  -2  -2 2229.98   76.79
   9   2   2 2146.39   84.79
   9   2   2 2272.27   81.39
   9   2   2 2276.77   73.79
   9   2   2 2175.08   71.59
   9   2   2 2294.27   80.19
   9   2   2 2211.08   76.09
   9   2   2 2151.38   76.79
   9   2   2 2264.77   74.29
  -9  -3  -2  992.90   68.19
  -9  -3  -2 1082.59   49.00
  -9  -3  -2 1115.19   51.69
  -9  -3  -2 1014.50   51.49
  -9  -3  -2 1163.08   54.99
  -9  -3  -2 1052.49   51.59
  -9  -3  -2 1116.69   52.29
   9   3   2 1072.79   57.99
   9   3   2 1069.59   47.10
   9   3   2 1145.69   50.89
   9   3   2 1010.70   61.89
   9   3   2 1133.19   53.69
   9   3   2 1096.59   50.39
   9   3   2 1135.99   59.49
   9   3   2 1067.29   59.59
  -9  -4  -2   18.50   23.90
  -9  -4  -2   21.70   28.40
  -9  -4  -2    9.20   26.60
  -9  -4  -2   39.40   24.90
  -9  -4  -2    2.80   33.00
  -9  -4  -2   20.20   27.70
  -9  -4  -2   -7.20   19.90
   9   4   2   -0.40   27.60
   9   4   2   22.20   28.20
   9   4   2   15.40   23.20
   9   4   2    1.90   34.90
   9   4   2   28.10   30.60
  -9  -5  -2  120.19   34.90
  -9  -5  -2  136.89   42.70
  -9  -5  -2  122.69   31.60
  -9  -5  -2  110.69   32.40
  -9  -5  -2  108.09   20.00
  -9  -5  -2   84.99   25.10
  -9  -5  -2  115.69   47.40
   9   5   2  116.89   50.69
   9   5   2   99.79   28.10
   9   5   2   73.99   36.00
   9   5   2  128.49   35.00
   9   5   2  125.79   28.20
   9   5   2   63.99   32.50
  -8   5  -2   61.09   22.60
  -8   5  -2   39.00   23.70
  -8   5  -2   45.30   33.10
  -8   5  -2   35.40   23.40
  -8   5  -2   94.69   34.00
  -8   5  -2  109.09   24.60
   8  -5   2   65.19   22.10
   8  -5   2   71.29   29.90
   8  -5   2  114.59   22.30
   8  -5   2   75.89   29.20
   8  -5   2   83.89   24.80
   8  -5   2   60.69   23.80
  -8   4  -2  413.26   37.60
  -8   4  -2  530.15   39.80
  -8   4  -2  433.96   35.20
  -8   4  -2  472.25   37.70
  -8   4  -2  561.14   49.50
  -8   4  -2  465.85   44.10
   8  -4   2  502.85   36.40
   8  -4   2  456.35   61.29
   8  -4   2  482.75   36.10
   8  -4   2  508.25   39.90
   8  -4   2  493.05   40.20
  -8   3  -2  102.69   22.80
  -8   3  -2   66.49   21.00
  -8   3  -2  140.29   34.50
  -8   3  -2  100.79   23.80
  -8   3  -2  112.59   24.70
  -8   3  -2   78.19   25.90
   8  -3   2   94.69   19.70
   8  -3   2   92.89   20.10
   8  -3   2   94.09   24.10
  -8   2  -2  476.15   40.10
  -8   2  -2  451.85   31.70
  -8   2  -2  452.45   33.00
  -8   2  -2  447.86   30.90
  -8   2  -2  460.45   30.80
  -8   2  -2  456.75   31.00
  -8   2  -2  452.95   39.80
   8  -2   2  375.06   29.30
   8  -2   2  451.95   31.90
   8  -2   2  448.86   30.80
   8  -2   2  442.06   30.50
   8  -2   2  440.96   32.00
   8  -2   2  411.46   37.30
  -8   1  -2  535.65   39.10
  -8   1  -2  547.15   28.90
  -8   1  -2  538.05   37.80
  -8   1  -2  573.14   33.60
  -8   1  -2  486.55   31.10
  -8   1  -2  511.65   32.40
  -8   1  -2  558.74   29.20
   8  -1   2  568.24   32.50
   8  -1   2  535.55   33.70
   8  -1   2  583.24   31.50
   8  -1   2  506.05   30.40
   8  -1   2  525.15   31.10
   8  -1   2  500.45   36.70
   8  -1   2  532.55   29.30
  -8   0  -2  295.47   29.60
  -8   0  -2  303.27   26.30
  -8   0  -2  335.97   38.30
  -8   0  -2  312.17   28.20
  -8   0  -2  317.17   25.70
  -8   0  -2  297.37   34.10
  -8   0  -2  279.27   24.60
   8   0   2  256.37   31.30
   8   0   2  324.97   23.10
   8   0   2  259.47   29.50
   8   0   2  261.27   23.80
   8   0   2  294.17   26.70
   8   0   2  270.27   27.50
   8   0   2  255.57   29.60
  -8  -1  -2  490.25   32.50
  -8  -1  -2  532.65   33.20
  -8  -1  -2  529.25   35.80
  -8  -1  -2  532.25   33.20
  -8  -1  -2  561.74   37.60
  -8  -1  -2  547.35   45.20
   8   1   2  568.54   32.20
   8   1   2  558.04   29.60
   8   1   2  544.55   36.80
   8   1   2  498.95   36.00
   8   1   2  544.25   32.60
   8   1   2  502.45   37.50
   8   1   2  482.75   36.80
  -8  -2  -2  435.86   34.50
  -8  -2  -2  418.96   33.40
  -8  -2  -2  441.36   48.10
  -8  -2  -2  406.46   33.20
  -8  -2  -2  484.95   37.20
  -8  -2  -2  365.86   32.90
   8   2   2  431.26   42.20
   8   2   2  428.86   34.90
   8   2   2  453.45   29.30
   8   2   2  402.06   34.80
   8   2   2  403.66   32.90
   8   2   2  411.56   32.60
   8   2   2  431.06   40.30
   8   2   2  425.46   36.10
  -8  -3  -2   52.49   40.60
  -8  -3  -2   99.09   21.60
  -8  -3  -2  152.78   24.60
  -8  -3  -2  105.79   22.40
  -8  -3  -2   75.69   25.10
  -8  -3  -2   91.59   24.40
  -8  -3  -2   80.19   21.70
   8   3   2   96.39   28.80
   8   3   2  106.49   27.00
   8   3   2  129.29   29.50
   8   3   2   95.79   22.40
   8   3   2  108.79   20.60
   8   3   2   92.09   28.50
   8   3   2   71.39   27.90
   8   3   2   98.29   22.60
  -8  -4  -2  454.55   61.49
  -8  -4  -2  449.95   44.90
  -8  -4  -2  477.95   32.30
  -8  -4  -2  472.75   36.90
  -8  -4  -2  458.45   41.30
  -8  -4  -2  477.65   44.00
   8   4   2  448.76   50.69
   8   4   2  531.65   40.20
   8   4   2  537.35   43.90
   8   4   2  454.65   51.99
   8   4   2  501.85   39.10
  -8  -5  -2   46.20   23.40
  -8  -5  -2   78.89   29.60
  -8  -5  -2  102.09   32.30
  -8  -5  -2  122.89   32.70
  -8  -5  -2  123.89   41.40
  -8  -5  -2   98.59   41.60
  -8  -5  -2   84.59   17.60
   8   5   2   34.80   27.60
   8   5   2   49.10   28.20
   8   5   2   57.39   33.20
   8   5   2   69.49   26.40
   8   5   2   70.39   26.20
   8   5   2   70.59   36.60
  -7   5  -2   76.79   31.40
  -7   5  -2   51.49   23.00
  -7   5  -2  109.29   22.60
  -7   5  -2  143.39   40.60
  -7   5  -2   97.39   23.10
  -7   5  -2   87.09   23.70
   7  -5   2   77.39   21.20
   7  -5   2   99.39   24.70
   7  -5   2   70.49   30.40
   7  -5   2   71.19   20.50
   7  -5   2   75.59   35.30
   7  -5   2  108.19   25.20
  -7   4  -2  820.32   46.70
  -7   4  -2  816.52   42.60
  -7   4  -2  828.72   43.60
  -7   4  -2  815.72   50.49
  -7   4  -2  777.62   40.10
  -7   4  -2  778.72   53.59
  -7   4  -2  735.53   40.30
   7  -4   2  788.12   42.70
   7  -4   2  809.42   50.69
   7  -4   2  891.61   47.30
   7  -4   2  825.92   41.20
   7  -4   2  871.91   44.90
   7  -4   2  866.71   39.50
  -7   3  -2  789.72   48.30
  -7   3  -2  792.32   37.30
  -7   3  -2  801.92   42.30
  -7   3  -2  830.82   45.90
  -7   3  -2  721.53   36.70
  -7   3  -2  776.62   38.40
  -7   3  -2  685.83   39.90
   7  -3   2  740.53   36.10
   7  -3   2  788.12   43.90
   7  -3   2  795.32   40.30
   7  -3   2  813.42   41.40
   7  -3   2  781.42   38.20
  -7   2  -2  450.15   36.10
  -7   2  -2  439.76   29.10
  -7   2  -2  469.65   36.90
  -7   2  -2  457.85   28.30
  -7   2  -2  487.25   36.80
  -7   2  -2  442.46   28.20
  -7   2  -2  431.16   28.20
   7  -2   2  456.25   28.00
   7  -2   2  520.25   29.00
   7  -2   2  463.65   32.70
   7  -2   2  389.96   22.10
   7  -2   2  445.66   27.60
   7  -2   2  447.56   34.90
  -7   1  -2  398.36   25.70
  -7   1  -2  407.16   27.70
  -7   1  -2  400.36   26.70
  -7   1  -2  395.86   35.30
  -7   1  -2  419.06   28.90
  -7   1  -2  447.96   25.10
  -7   1  -2  427.76   34.20
   7  -1   2  414.66   27.00
   7  -1   2  398.16   32.60
   7  -1   2  437.46   25.90
   7  -1   2  375.76   26.20
   7  -1   2  394.76   27.80
   7  -1   2  447.76   27.10
  -7   0  -2  146.29   18.00
  -7   0  -2  166.68   21.50
  -7   0  -2  209.28   22.30
  -7   0  -2  189.18   22.90
  -7   0  -2  168.98   19.90
  -7   0  -2  187.38   24.00
  -7   0  -2  156.88   23.50
   7   0   2  209.68   21.80
   7   0   2  136.19   19.90
   7   0   2  168.68   24.10
   7   0   2  179.78   23.90
   7   0   2  164.78   20.20
   7   0   2  176.58   23.70
   7   0   2  183.88   21.00
  -7  -1  -2  365.96   31.80
  -7  -1  -2  394.76   26.10
  -7  -1  -2  409.16   29.60
  -7  -1  -2  375.46   40.30
  -7  -1  -2  390.36   32.40
  -7  -1  -2  382.76   31.30
   7   1   2  411.96   29.50
   7   1   2  406.86   28.40
   7   1   2  430.86   26.30
   7   1   2  341.37   33.10
   7   1   2  434.16   35.90
   7   1   2  391.86   31.10
   7   1   2  363.06   32.80
   7   1   2  404.06   25.30
  -7  -2  -2  406.76   34.80
  -7  -2  -2  470.85   43.70
  -7  -2  -2  457.15   31.70
  -7  -2  -2  443.96   35.60
  -7  -2  -2  456.15   31.30
  -7  -2  -2  455.05   29.60
   7   2   2  444.16   30.90
   7   2   2  416.36   36.70
   7   2   2  397.06   36.00
   7   2   2  424.66   27.50
   7   2   2  435.26   32.20
   7   2   2  419.96   31.70
   7   2   2  427.26   37.40
   7   2   2  465.85   39.20
  -7  -3  -2  727.83   40.80
  -7  -3  -2  812.92   46.10
  -7  -3  -2  789.02   38.30
  -7  -3  -2  736.63   56.29
  -7  -3  -2  804.02   46.60
  -7  -3  -2  752.82   41.40
  -7  -3  -2  766.82   42.20
   7   3   2  797.22   40.20
   7   3   2  815.72   40.00
   7   3   2  793.62   48.80
   7   3   2  799.82   51.99
   7   3   2  801.32   49.50
  -7  -4  -2  815.92   46.60
  -7  -4  -2  937.51   71.59
  -7  -4  -2  863.01   46.10
  -7  -4  -2  816.82   36.80
  -7  -4  -2  794.52   46.10
  -7  -4  -2  842.82   52.59
  -7  -4  -2  786.62   65.49
   7   4   2  818.22   41.50
   7   4   2  842.12   53.69
   7   4   2  900.01   45.10
   7   4   2  803.52   56.99
   7   4   2  774.32   54.59
  -7  -5  -2   97.19   31.40
  -7  -5  -2   77.39   25.50
  -7  -5  -2  111.39   31.60
  -7  -5  -2   82.99   37.40
  -7  -5  -2   44.10   24.70
  -7  -5  -2   92.39   31.00
  -7  -5  -2  107.69   21.00
   7   5   2  101.89   63.59
   7   5   2   51.79   28.40
   7   5   2   87.59   44.10
   7   5   2   94.89   31.30
   7   5   2   68.99   25.10
   7   5   2  103.19   25.90
  -6   6  -2   21.80   24.80
  -6   6  -2   97.39   33.60
  -6   6  -2  104.79   23.90
  -6   6  -2  104.39   24.60
  -6   6  -2   76.89   35.10
  -6   6  -2  161.58   42.30
  -6   6  -2   32.00   26.90
   6  -6   2   58.39   22.30
   6  -6   2   99.39   27.40
   6  -6   2   72.09   33.40
   6  -6   2   87.59   26.20
   6  -6   2   82.29   32.80
  -6   5  -2   46.50   21.40
  -6   5  -2   48.30   32.30
  -6   5  -2   -2.70   25.50
  -6   5  -2   12.40   19.50
  -6   5  -2   -6.70   37.00
   6  -5   2    5.80   22.00
   6  -5   2   35.90   30.00
   6  -5   2   17.00   19.10
   6  -5   2   17.90   23.70
   6  -5   2   31.40   22.20
  -6   4  -2 1268.87   59.49
  -6   4  -2 1298.37   50.49
  -6   4  -2 1326.17   54.49
  -6   4  -2 1229.38   48.20
  -6   4  -2 1192.58   49.90
  -6   4  -2 1275.47   61.19
   6  -4   2 1269.07   48.30
   6  -4   2 1250.57   58.99
   6  -4   2 1213.38   54.99
   6  -4   2 1268.97   54.29
   6  -4   2 1228.38   50.99
   6  -4   2 1302.87   52.69
  -6   3  -2  158.28   18.90
  -6   3  -2  183.38   31.10
  -6   3  -2  149.29   23.90
  -6   3  -2  166.98   20.50
  -6   3  -2  147.09   24.10
  -6   3  -2  164.58   23.90
  -6   3  -2  179.28   25.90
   6  -3   2  178.48   30.70
   6  -3   2  184.98   21.00
   6  -3   2  221.08   32.20
   6  -3   2  214.18   25.30
   6  -3   2  192.48   24.90
   6  -3   2  175.98   24.30
  -6   2  -2  928.91   37.00
  -6   2  -2  898.61   36.00
  -6   2  -2  937.41   38.10
  -6   2  -2  903.91   37.70
  -6   2  -2  920.61   44.00
  -6   2  -2  906.21   35.90
  -6   2  -2  929.91   43.50
   6  -2   2  885.31   29.60
   6  -2   2  973.40   36.50
   6  -2   2  896.91   42.60
   6  -2   2  975.40   37.50
   6  -2   2  884.81   35.60
   6  -2   2  934.51   36.70
  -6   1  -2 4231.18  119.29
  -6   1  -2 4421.46  118.79
  -6   1  -2 4304.37  124.29
  -6   1  -2 4132.19  118.29
  -6   1  -2 4358.26  117.89
  -6   1  -2 4345.47  123.29
  -6   1  -2 4150.98  118.29
   6  -1   2 4416.26  118.59
   6  -1   2 4309.37  119.09
   6  -1   2 3702.03  122.29
   6  -1   2 4373.86  118.29
   6  -1   2 4308.47  118.69
   6  -1   2 4243.18  119.09
   6  -1   2 4322.17  123.59
  -6   0  -2   21.50   21.30
  -6   0  -2  -12.30   14.60
  -6   0  -2    2.40   15.70
  -6   0  -2   -2.80   17.20
  -6   0  -2    8.70   15.40
  -6   0  -2   -3.80   16.90
  -6   0  -2    5.10   16.90
   6   0   2   -6.20   17.30
   6   0   2    0.40   14.60
   6   0   2    4.80   15.30
   6   0   2  -29.70   16.60
   6   0   2  -11.70   14.80
   6   0   2   -2.30   12.90
   6   0   2   -6.30   15.90
  -6  -1  -2 4372.36  124.59
  -6  -1  -2 4404.06  123.49
  -6  -1  -2 4292.27  130.09
  -6  -1  -2 4319.57  121.69
  -6  -1  -2 4308.67  122.29
  -6  -1  -2 4064.39  120.79
   6   1   2 4182.18  124.99
   6   1   2 4404.66  121.29
   6   1   2 4283.47  124.29
   6   1   2 4498.05  121.29
   6   1   2 4270.87  123.19
   6   1   2 4267.57  123.89
   6   1   2 4535.65  121.39
   6   1   2 4534.05  129.49
  -6  -2  -2  887.91   49.90
  -6  -2  -2  848.72   39.40
  -6  -2  -2  910.71   36.50
  -6  -2  -2  833.72   39.60
  -6  -2  -2  954.50   39.00
  -6  -2  -2  870.31   38.90
   6   2   2  899.91   38.00
   6   2   2  920.01   44.70
   6   2   2  957.30   46.80
   6   2   2  858.41   37.40
   6   2   2  874.01   38.80
   6   2   2  872.31   40.20
   6   2   2  852.51   43.00
  -6  -3  -2  172.28   23.50
  -6  -3  -2  165.68   24.20
  -6  -3  -2  138.39   27.30
  -6  -3  -2  222.58   25.30
  -6  -3  -2  187.18   22.80
  -6  -3  -2  139.19   23.40
  -6  -3  -2  203.28   29.40
   6   3   2  195.68   28.50
   6   3   2  158.98   25.20
   6   3   2  124.09   22.20
   6   3   2  185.98   36.10
   6   3   2  195.88   27.60
  -6  -4  -2 1248.88   53.39
  -6  -4  -2 1361.16   55.89
  -6  -4  -2 1162.68   71.29
  -6  -4  -2 1282.57   59.29
  -6  -4  -2 1266.07   45.70
  -6  -4  -2 1306.97   59.19
  -6  -4  -2 1195.78   54.69
   6   4   2 1228.08   51.89
   6   4   2 1322.67   66.59
   6   4   2 1335.27   53.09
   6   4   2 1328.87   61.89
   6   4   2 1315.97   60.49
   6   4   2 1301.57   62.69
  -6  -5  -2   40.90   27.70
  -6  -5  -2   38.70   23.50
  -6  -5  -2   24.90   28.50
  -6  -5  -2   29.40   16.60
  -6  -5  -2   22.00   33.80
  -6  -5  -2   21.70   29.40
  -6  -5  -2    6.80   24.80
   6   5   2   12.80   25.30
   6   5   2   25.00   23.00
   6   5   2   24.60   22.80
   6   5   2   10.00   27.70
   6   5   2    4.30   27.20
  -6  -6  -2  100.89   30.00
  -6  -6  -2  101.69   41.40
  -6  -6  -2   65.79   24.60
  -6  -6  -2   63.09   30.90
  -6  -6  -2  101.49   39.70
   6   6   2   63.79   30.30
   6   6   2   94.39   27.10
   6   6   2   40.90   36.20
   6   6   2   47.50   45.70
   6   6   2   52.79   25.00
   6   6   2   73.49   31.80
  -5   6  -2   35.20   36.70
  -5   6  -2   54.39   48.00
  -5   6  -2   50.09   21.40
  -5   6  -2   41.10   22.10
  -5   6  -2   62.69   37.20
  -5   6  -2  -14.50   43.30
   5  -6   2   28.00   32.40
   5  -6   2   30.30   20.80
   5  -6   2   20.20   22.20
   5  -6   2  -11.00   30.60
   5  -6   2   25.40   34.70
  -5   5  -2  492.85   33.80
  -5   5  -2  495.55   37.10
  -5   5  -2  518.65   36.90
  -5   5  -2  556.94   53.99
  -5   5  -2  535.35   49.40
  -5   5  -2  554.74   38.30
  -5   5  -2  551.54   63.09
   5  -5   2  526.95   37.60
   5  -5   2  519.15   46.90
   5  -5   2  476.05   40.60
   5  -5   2  569.14   40.30
  -5   4  -2  219.08   26.00
  -5   4  -2  273.97   33.50
  -5   4  -2  186.48   22.20
  -5   4  -2  224.48   42.20
  -5   4  -2  222.48   34.70
   5  -4   2  240.08   27.90
   5  -4   2  209.28   31.50
   5  -4   2  206.28   30.50
   5  -4   2  200.88   27.10
   5  -4   2  215.78   36.80
  -5   3  -2  332.57   25.90
  -5   3  -2  290.07   35.20
  -5   3  -2  376.46   30.30
  -5   3  -2  331.57   23.80
  -5   3  -2  338.47   25.80
  -5   3  -2  269.27   32.00
  -5   3  -2  268.37   26.60
   5  -3   2  322.57   32.50
   5  -3   2  339.47   24.70
   5  -3   2  334.57   29.70
   5  -3   2  325.57   25.60
   5  -3   2  342.07   28.20
   5  -3   2  346.17   24.10
  -5   2  -2 2631.94   79.99
  -5   2  -2 2588.14   74.19
  -5   2  -2 2555.54   80.59
  -5   2  -2 2332.77   73.59
  -5   2  -2 2553.04   74.59
  -5   2  -2 2527.85   74.59
  -5   2  -2 2542.55   76.79
   5  -2   2 2611.24   74.09
   5  -2   2 2537.15   73.99
   5  -2   2 2533.25   79.39
   5  -2   2 2518.95   74.49
   5  -2   2 2586.34   75.09
  -5   1  -2 2741.13   76.29
  -5   1  -2 2593.04   76.69
  -5   1  -2 2613.24   77.79
  -5   1  -2 2718.63   78.09
  -5   1  -2 2719.83   82.99
  -5   1  -2 2635.44   77.39
  -5   1  -2 2829.82   83.39
   5  -1   2 2665.53   82.29
   5  -1   2 2648.44   77.69
   5  -1   2 2856.51   77.79
   5  -1   2 2710.63   77.99
   5  -1   2 2712.13   77.59
   5  -1   2 2539.65   76.19
   5  -1   2 2633.34   77.29
  -5  -1  -2 2577.74   76.89
  -5  -1  -2 2710.53   80.49
  -5  -1  -2 2667.83   80.19
  -5  -1  -2 2657.43   78.89
  -5  -1  -2 2610.14   85.89
  -5  -1  -2 2655.13   77.99
   5   1   2 2738.13   80.99
   5   1   2 2670.13   77.49
   5   1   2 2630.14   80.69
   5   1   2 2593.34   76.59
   5   1   2 2351.46   90.19
   5   1   2 2907.51   85.49
   5   1   2 2723.53   77.99
   5   1   2 2556.24   81.79
  -5  -2  -2 2453.05   75.79
  -5  -2  -2 2585.64   86.59
  -5  -2  -2 2597.64   76.69
  -5  -2  -2 2607.24   77.09
  -5  -2  -2 2541.35   79.49
  -5  -2  -2 2573.04   79.79
   5   2   2 2470.35   81.59
   5   2   2 2540.15   83.99
   5   2   2 2469.15   75.39
   5   2   2 2475.95   80.49
   5   2   2 2639.04   76.59
   5   2   2 2447.96   76.99
   5   2   2 2791.72   80.89
  -5  -3  -2  310.07   24.30
  -5  -3  -2  302.27   40.50
  -5  -3  -2  278.87   33.80
  -5  -3  -2  293.47   28.30
  -5  -3  -2  297.67   29.30
  -5  -3  -2  253.87   34.20
  -5  -3  -2  315.87   29.70
   5   3   2  368.16   37.80
   5   3   2  329.07   36.00
   5   3   2  343.77   28.20
   5   3   2  325.47   28.30
  -5  -4  -2  223.18   34.50
  -5  -4  -2  157.98   35.60
  -5  -4  -2  190.58   23.40
  -5  -4  -2  166.58   28.40
  -5  -4  -2  217.28   32.70
  -5  -4  -2  187.68   26.50
   5   4   2  236.48   41.80
   5   4   2  225.58   31.00
   5   4   2  201.98   31.10
   5   4   2  226.18   32.20
   5   4   2  156.48   25.20
  -5  -5  -2  452.15   40.80
  -5  -5  -2  597.24   61.29
  -5  -5  -2  554.54   44.60
  -5  -5  -2  487.05   43.30
  -5  -5  -2  525.85   46.30
  -5  -5  -2  481.35   39.80
  -5  -5  -2  527.35   23.40
   5   5   2  499.85   53.39
   5   5   2  564.44   46.60
   5   5   2  535.35   39.10
   5   5   2  512.45   37.80
   5   5   2  442.96   46.40
   5   5   2  505.85   48.70
  -5  -6  -2   59.79   23.20
  -5  -6  -2   33.90   26.90
  -5  -6  -2    9.30   30.30
  -5  -6  -2   37.40   34.20
   5   6   2   29.30   31.80
   5   6   2   36.70   40.10
   5   6   2   -9.50   23.30
   5   6   2    7.50   34.50
   5   6   2   31.20   26.20
   5   6   2   42.70   30.80
  -4   6  -2  -46.80   29.20
  -4   6  -2    8.50   20.20
  -4   6  -2   11.70   29.30
  -4   6  -2  -27.30   22.40
  -4   6  -2  -10.20   19.30
  -4   6  -2   27.30   44.70
   4  -6   2  -10.50   24.50
   4  -6   2   -4.80   18.90
   4  -6   2   31.50   31.20
   4  -6   2   -4.80   23.10
   4  -6   2   -0.20   35.60
  -4   5  -2  471.55   33.80
  -4   5  -2  430.06   47.30
  -4   5  -2  447.56   36.40
  -4   5  -2  471.25   59.89
  -4   5  -2  464.15   35.50
   4  -5   2  463.35   44.90
   4  -5   2  445.56   33.20
   4  -5   2  419.56   33.00
   4  -5   2  458.35   38.40
   4  -5   2  479.95   38.70
  -4   4  -2 3238.28   94.89
  -4   4  -2 3404.96   96.89
  -4   4  -2 3283.97   96.39
  -4   4  -2 3215.18  104.99
  -4   4  -2 3194.98   96.89
   4  -4   2 3288.17   98.19
   4  -4   2 3342.57  103.89
   4  -4   2 3148.49   97.39
   4  -4   2 3236.18   98.19
   4  -4   2 3306.87   95.49
  -4   3  -2 3095.89   89.89
  -4   3  -2 3107.49   90.19
  -4   3  -2 3196.68   93.29
  -4   3  -2 3200.38   90.39
  -4   3  -2 3092.29   89.79
   4  -3   2 3136.49   93.39
   4  -3   2 3217.08   91.89
   4  -3   2 3067.39   89.59
   4  -3   2 3223.58   91.49
   4  -3   2 3152.98   96.09
  -4   2  -2 1268.17   47.60
  -4   2  -2 1241.48   49.00
  -4   2  -2 1271.97   41.90
  -4   2  -2 1172.58   46.00
  -4   2  -2 1332.17   42.10
  -4   2  -2 1160.58   40.90
  -4   2  -2 1214.78   42.60
   4  -2   2 1279.27   47.90
   4  -2   2 1248.98   41.00
   4  -2   2 1296.77   41.90
   4  -2   2 1303.57   42.90
   4  -2   2 1193.18   46.60
  -4   1  -2 2341.97   66.49
  -4   1  -2 2291.57   65.09
  -4   1  -2 2252.17   65.79
  -4   1  -2 2338.67   70.69
  -4   1  -2 2332.17   65.79
  -4   1  -2 2191.68   65.69
  -4   1  -2 2296.77   70.39
   4  -1   2 2304.07   65.79
   4  -1   2 2173.58   64.39
   4  -1   2 2202.48   65.79
   4  -1   2 2390.96   65.79
   4  -1   2 2401.26   65.69
   4  -1   2 2212.18   69.99
  -4  -1  -2 2411.76   74.69
  -4  -1  -2 2362.96   72.19
  -4  -1  -2 2348.36   70.19
  -4  -1  -2 2343.07   70.99
  -4  -1  -2 2347.07   82.69
  -4  -1  -2 2163.38   66.99
   4   1   2 2473.85   73.99
   4   1   2 2241.08   67.79
   4   1   2 2214.98   69.19
   4   1   2 2132.29   71.49
   4   1   2 2484.45   69.69
   4   1   2 2270.27   70.49
   4   1   2 2253.37   69.99
  -4  -2  -2 1200.88   44.20
  -4  -2  -2 1288.67   45.30
  -4  -2  -2 1286.27   56.09
  -4  -2  -2 1261.87   53.59
  -4  -2  -2 1277.47   44.80
  -4  -2  -2 1183.38   48.10
  -4  -2  -2 1184.18   45.80
   4   2   2 1164.28   56.89
   4   2   2 1183.38   43.50
   4   2   2 1125.89   45.60
   4   2   2 1336.37   52.09
   4   2   2 1204.88   49.99
   4   2   2 1210.48   44.00
   4   2   2 1158.58   48.20
  -4  -3  -2 3175.38   96.09
  -4  -3  -2 3035.80  103.99
  -4  -3  -2 3012.00   92.59
  -4  -3  -2 3142.39   92.39
  -4  -3  -2 3071.29   93.89
  -4  -3  -2 3106.19   96.29
   4   3   2 3082.29   92.19
   4   3   2 3117.69   96.69
   4   3   2 3328.47  102.39
   4   3   2 3336.47   92.59
   4   3   2 3142.89   97.79
  -4  -4  -2 3118.79  113.99
  -4  -4  -2 3148.78   94.29
  -4  -4  -2 3274.67  103.09
  -4  -4  -2 3204.88  100.89
  -4  -4  -2 3177.48   98.09
  -4  -4  -2 3314.67  103.19
  -4  -4  -2 3082.89   98.89
   4   4   2 3311.67  103.69
   4   4   2 3377.56   98.19
   4   4   2 3341.37  103.59
   4   4   2 3362.66   98.39
   4   4   2 3239.38  110.89
   4   4   2 3251.87  105.19
  -4  -5  -2  439.76   41.60
  -4  -5  -2  401.06   41.00
  -4  -5  -2  434.06   21.30
  -4  -5  -2  426.06   46.40
  -4  -5  -2  447.26   44.40
  -4  -5  -2  471.85   39.00
  -4  -5  -2  426.96   57.89
   4   5   2  412.96   45.00
   4   5   2  395.66   44.50
   4   5   2  460.55   36.80
   4   5   2  449.76   37.30
   4   5   2  442.56   53.49
   4   5   2  415.16   44.10
  -4  -6  -2    8.10   29.50
  -4  -6  -2   71.39   46.30
  -4  -6  -2    0.20   28.90
  -4  -6  -2  -22.80   24.60
  -4  -6  -2   33.50   22.50
   4   6   2  -16.80   28.10
   4   6   2    4.70   27.90
   4   6   2    0.40   22.60
   4   6   2   10.00   27.50
   4   6   2  -22.20   33.70
   4   6   2    2.80   22.30
  -3   6  -2   19.10   22.50
  -3   6  -2   74.29   21.10
  -3   6  -2   84.29   36.10
  -3   6  -2    2.10   24.10
  -3   6  -2   54.69   28.10
  -3   6  -2   42.40   20.00
   3  -6   2   30.90   25.90
   3  -6   2   43.40   24.60
   3  -6   2   58.39   18.40
  -3   5  -2  656.03   38.00
  -3   5  -2  685.33   48.60
  -3   5  -2  676.43   38.70
  -3   5  -2  605.14   34.30
  -3   5  -2  617.14   61.89
  -3   5  -2  636.84   40.40
   3  -5   2  610.34   36.70
   3  -5   2  664.63   34.50
   3  -5   2  703.43   39.70
   3  -5   2  653.93   43.20
   3  -5   2  685.43   48.10
  -3   4  -2 1663.53   78.09
  -3   4  -2 1705.93   57.89
  -3   4  -2 1673.23   56.19
  -3   4  -2 1701.33   55.39
  -3   4  -2 1644.34   56.99
  -3   4  -2 1780.42   66.29
   3  -4   2 1780.22   65.09
   3  -4   2 1725.93   60.39
   3  -4   2 1688.23   58.79
   3  -4   2 1714.33   56.19
   3  -4   2 1781.72   57.69
  -3   3  -2 2349.17   70.99
  -3   3  -2 2348.57   71.69
  -3   3  -2 2322.17   71.49
  -3   3  -2 2517.25   78.99
  -3   3  -2 2407.16   71.19
  -3   3  -2 2520.05   73.49
   3  -3   2 2495.95   71.19
   3  -3   2 2436.16   73.29
   3  -3   2 2488.85   73.29
   3  -3   2 2503.85   77.99
   3  -3   2 2495.85   73.79
  -3   2  -2 4263.17  117.39
  -3   2  -2 4286.17  117.19
  -3   2  -2 4235.28  116.89
  -3   2  -2 4200.78  116.99
  -3   2  -2 4439.86  120.59
  -3   2  -2 4326.47  122.69
   3  -2   2 4305.77  120.39
   3  -2   2 4286.97  117.89
   3  -2   2 4235.18  121.79
   3  -2   2 4220.78  116.69
   3  -2   2 4466.25  117.99
   3  -1   2 5072.59  138.99
  -3   0  -2  848.12   30.40
  -3   0  -2  860.21   30.60
  -3   0  -2  860.11   33.70
  -3   0  -2  820.92   27.80
  -3   0  -2  897.11   30.20
  -3   0  -2  925.61   35.00
  -3   0  -2  949.71   31.90
   3   0   2  853.91   30.60
   3   0   2  861.01   30.30
   3   0   2  835.32   31.30
   3   0   2  841.12   28.90
   3   0   2  840.52   29.00
   3   0   2  839.82   26.00
   3   0   2  795.52   33.10
  -3  -1  -2 4943.31  137.99
  -3  -1  -2 5030.70  135.79
  -3  -1  -2 4902.61  135.69
   3   1   2 5081.69  135.99
   3   1   2 4852.61  136.69
  -3  -2  -2 4332.47  117.09
  -3  -2  -2 4059.99  116.99
  -3  -2  -2 4230.78  118.59
  -3  -2  -2 3994.70  124.49
  -3  -2  -2 4276.97  117.59
  -3  -2  -2 4215.08  120.39
  -3  -2  -2 4066.29  119.49
   3   2   2 4547.75  124.69
   3   2   2 4336.07  117.69
   3   2   2 4296.97  117.49
   3   2   2 4191.28  121.79
  -3  -3  -2 2337.67   75.89
  -3  -3  -2 2326.17   77.39
  -3  -3  -2 2396.66   73.79
  -3  -3  -2 2240.88   83.99
  -3  -3  -2 2383.36   75.59
  -3  -3  -2 2406.16   70.29
   3   3   2 2561.54   83.49
   3   3   2 2472.75   78.79
   3   3   2 2569.14   74.39
   3   3   2 2391.96   76.29
   3   3   2 2502.85   73.89
   3   3   2 2402.76   77.69
  -3  -4  -2 1758.72   76.99
  -3  -4  -2 1708.33   61.89
  -3  -4  -2 1793.42   65.69
  -3  -4  -2 1683.53   65.59
  -3  -4  -2 1689.33   60.19
  -3  -4  -2 1693.53   63.49
  -3  -4  -2 1723.73   53.09
   3   4   2 1890.21   66.09
   3   4   2 1750.92   65.59
   3   4   2 1709.43   66.09
   3   4   2 1662.63   57.79
   3   4   2 1781.82   60.89
   3   4   2 1707.13   73.19
  -3  -5  -2  617.34   25.50
  -3  -5  -2  678.23   62.79
  -3  -5  -2  644.74   41.70
  -3  -5  -2  677.83   47.20
  -3  -5  -2  672.83   44.70
  -3  -5  -2  652.63   48.40
  -3  -5  -2  613.24   45.20
   3   5   2  668.63   48.30
   3   5   2  623.54   56.29
   3   5   2  716.73   47.50
   3   5   2  657.33   39.90
   3   5   2  668.93   41.40
   3   5   2  692.93   50.39
  -3  -6  -2   83.69   29.90
  -3  -6  -2   55.09   25.60
  -3  -6  -2   82.89   27.20
  -3  -6  -2   99.69   30.70
  -3  -6  -2   80.09   26.20
   3   6   2   19.70   28.30
   3   6   2   47.50   27.30
   3   6   2   76.59   25.20
   3   6   2   64.19   24.30
   3   6   2   62.29   27.70
   3   6   2   13.10   27.50
  -2   6  -2   67.49   34.50
  -2   6  -2  -14.60   23.80
  -2   6  -2   20.30   19.60
  -2   6  -2  -37.30   21.90
  -2   6  -2   26.90   25.90
  -2   6  -2    2.30   18.60
   2  -6   2   -2.70   26.40
   2  -6   2    8.90   11.60
  -2   5  -2  292.57   34.90
  -2   5  -2  237.08   21.20
  -2   5  -2  297.77   29.00
  -2   5  -2  330.87   42.40
  -2   5  -2  242.48   32.20
  -2   5  -2  304.67   54.09
  -2   5  -2  293.07   30.60
   2  -5   2  257.07   30.40
   2  -5   2  287.97   39.50
   2  -5   2  265.57   24.30
   2  -5   2  313.37   32.50
  -2   4  -2  611.04   33.60
  -2   4  -2  577.24   52.79
  -2   4  -2  629.44   41.50
  -2   4  -2  601.84   31.70
  -2   4  -2  624.04   30.40
  -2   4  -2  499.65   23.70
  -2   4  -2  635.54   31.00
   2  -4   2  603.54   35.60
   2  -4   2  607.94   30.70
   2  -4   2  528.15   34.10
   2  -4   2  602.34   39.20
   2  -4   2  616.54   29.50
  -2   3  -2  119.59   22.00
  -2   3  -2   62.89   13.80
  -2   3  -2   54.49   13.00
  -2   3  -2   50.89   13.50
  -2   3  -2   62.69   14.50
   2  -3   2  105.99   19.50
   2  -3   2   78.79   15.40
   2  -3   2   76.89   13.20
   2  -3   2   89.79   14.60
   2  -3   2  105.39   15.90
  -2   2  -2 1602.34   47.10
  -2   2  -2 1533.95   47.90
  -2   2  -2 1585.84   48.10
  -2   2  -2 1478.35   47.00
  -2   2  -2 1679.43   50.39
   2  -2   2 1565.64   48.10
   2  -2   2 1607.64   47.40
   2  -2   2 1609.14   49.20
   2  -2   2 1625.94   53.59
   2  -2   2 1633.84   50.39
  -2  -2  -2 1597.14   52.09
  -2  -2  -2 1530.85   48.80
  -2  -2  -2 1561.04   54.69
  -2  -2  -2 1581.94   50.49
  -2  -2  -2 1594.54   48.80
  -2  -2  -2 1530.75   50.99
  -2  -2  -2 1583.34   57.89
  -2  -2  -2 1592.84   55.09
   2   2   2 1368.26   64.89
   2   2   2 1600.94   56.69
   2   2   2 1543.25   54.49
   2   2   2 1526.45   54.39
   2   2   2 1579.44   48.70
   2   2   2 1607.44   52.49
  -2  -3  -2   87.39   14.50
  -2  -3  -2   59.69   21.30
  -2  -3  -2   33.50   20.20
  -2  -3  -2   99.39   19.40
  -2  -3  -2   67.69   17.10
  -2  -3  -2   59.09   21.40
  -2  -3  -2   65.79   16.90
   2   3   2   66.49   20.80
   2   3   2   91.69   21.60
   2   3   2   79.79   16.40
   2   3   2   59.89   15.30
   2   3   2   72.99   20.10
   2   3   2  102.99   20.60
  -2  -4  -2  572.84   26.90
  -2  -4  -2  590.04   38.60
  -2  -4  -2  626.54   41.70
  -2  -4  -2  606.54   36.40
  -2  -4  -2  625.94   43.50
  -2  -4  -2  560.44   40.60
  -2  -4  -2  575.64   52.49
   2   4   2  595.14   47.50
   2   4   2  580.74   35.30
   2   4   2  633.24   41.40
   2   4   2  590.44   40.00
   2   4   2  643.74   40.00
   2   4   2  609.94   36.70
   2   4   2  609.44   38.40
  -2  -5  -2  254.47   38.80
  -2  -5  -2  258.27   19.80
  -2  -5  -2  319.87   30.80
  -2  -5  -2  311.07   44.60
  -2  -5  -2  300.77   40.70
  -2  -5  -2  294.37   37.60
   2   5   2  250.47   28.80
   2   5   2  308.97   36.20
   2   5   2  255.47   32.00
   2   5   2  318.37   37.90
   2   5   2  293.67   39.60
   2   5   2  235.98   30.10
   2   5   2  277.47   49.90
  -2  -6  -2   21.70   23.50
  -2  -6  -2   37.30   28.10
  -2  -6  -2   69.99   28.80
  -2  -6  -2   21.70   25.80
  -2  -6  -2   -1.90   26.70
   2   6   2    6.30   26.60
   2   6   2   -4.90   26.80
   2   6   2   21.10   27.40
   2   6   2   32.80   22.90
   2   6   2   30.70   22.70
   2   6   2   21.00   25.40
  -1   6  -2  155.38   31.40
  -1   6  -2   97.59   24.40
  -1   6  -2  114.19   20.70
  -1   6  -2  127.29   21.60
  -1   6  -2   92.29   32.00
  -1   6  -2  135.59   20.00
  -1   6  -2   88.49   25.90
   1  -6   2  140.29   39.10
   1  -6   2  173.58   28.80
  -1   5  -2 2194.38   93.39
  -1   5  -2 2081.19   68.09
  -1   5  -2 2011.40   76.59
  -1   5  -2 2128.49   71.89
  -1   5  -2 2032.30   64.99
  -1   5  -2 2013.90   70.49
  -1   5  -2 2062.49   67.39
   1  -5   2 2068.89   71.29
   1  -5   2 2167.18   77.69
   1  -5   2 2129.49   61.89
   1  -5   2 2096.79   68.79
  -1   4  -2  554.34   28.80
  -1   4  -2  601.24   30.50
  -1   4  -2  536.95   49.90
  -1   4  -2  585.54   39.00
  -1   4  -2  595.94   30.10
  -1   4  -2  568.14   27.50
  -1   4  -2  552.14   32.60
   1  -4   2  522.25   36.90
   1  -4   2  578.54   25.20
   1  -4   2  552.54   34.30
   1  -4   2  558.54   29.50
   1  -4   2  496.05   33.10
  -1   3  -2 2087.69   62.29
  -1   3  -2 2033.00   63.49
  -1   3  -2 2057.19   59.89
  -1   3  -2 2102.89   77.99
  -1   3  -2 2043.60   61.39
  -1   3  -2 2206.18   62.79
  -1   3  -2 2104.19   68.49
   1  -3   2 2094.89   64.29
   1  -3   2 2036.20   67.49
   1  -3   2 2045.20   61.69
   1  -3   2 2220.18   64.29
   1  -3   2 2113.09   61.09
  -1   2  -2 5757.02  159.08
   1  -2   2 5894.41  159.48
   1  -2   2 6265.77  159.68
  -1  -2  -2 5865.71  158.78
   1   2   2 5879.61  158.68
   1   2   2 5750.02  158.68
   1   2   2 5655.03  158.38
  -1  -3  -2 2123.89   65.29
  -1  -3  -2 2034.60   75.69
  -1  -3  -2 2056.99   63.29
  -1  -3  -2 1992.80   67.19
  -1  -3  -2 2173.98   68.09
   1   3   2 2091.09   67.79
   1   3   2 2194.68   68.29
   1   3   2 2098.79   73.89
   1   3   2 1987.70   63.89
   1   3   2 2020.90   62.89
   1   3   2 2161.08   66.89
   1   3   2 2002.60   67.79
  -1  -4  -2  543.25   41.40
  -1  -4  -2  558.64   37.80
  -1  -4  -2  507.65   32.80
  -1  -4  -2  535.75   34.10
   1   4   2  569.94   46.20
   1   4   2  585.14   39.60
   1   4   2  600.14   37.90
   1   4   2  521.25   33.60
   1   4   2  513.25   33.70
   1   4   2  542.05   31.80
   1   4   2  568.04   37.20
  -1  -5  -2 2118.79   72.09
  -1  -5  -2 2064.89   77.19
  -1  -5  -2 2147.79   78.39
  -1  -5  -2 2160.38   73.69
  -1  -5  -2 2000.00   77.19
  -1  -5  -2 2178.78   64.09
  -1  -5  -2 2051.89   64.99
   1   5   2 2115.79   72.19
   1   5   2 2007.10   77.39
   1   5   2 2051.19   76.69
   1   5   2 2182.08   75.69
   1   5   2 2052.99   88.39
   1   5   2 2151.88   76.59
   1   5   2 2279.67   72.89
  -1  -6  -2  111.29   26.50
  -1  -6  -2  115.39   28.50
  -1  -6  -2  122.19   29.50
  -1  -6  -2  187.38   32.00
  -1  -6  -2  116.09   26.10
   1   6   2  108.99   24.20
   1   6   2   88.79   28.00
   1   6   2  111.39   27.50
   1   6   2  119.59   42.90
   1   6   2   77.19   27.60
   1   6   2   99.29   25.70
   1   6   2  135.49   24.70
   0   6  -2  334.67   40.40
   0   6  -2  308.87   42.50
   0   6  -2  312.07   57.29
   0   6  -2  388.36   32.20
   0   6  -2  438.06   36.30
   0   6  -2  335.47   31.90
   0   6  -2  303.97   37.70
   0  -6   2  391.96   39.50
   0   5  -2 1468.65   52.59
   0   5  -2 1452.25   76.99
   0   5  -2 1421.36   53.09
   0   5  -2 1491.05   53.59
   0   5  -2 1544.15   57.99
   0   5  -2 1496.85   55.69
   0   5  -2 1536.55   64.09
   0  -5   2 1498.15   62.69
   0  -5   2 1546.85   59.19
   0  -5   2 1410.06   54.09
   0   4  -2  336.07   22.60
   0   4  -2  379.86   26.30
   0   4  -2  361.96   33.00
   0   4  -2  341.57   29.80
   0   4  -2  359.96   25.60
   0   4  -2  353.36   26.60
   0   4  -2  360.16   44.60
   0  -4   2  355.16   28.10
   0  -4   2  356.36   32.70
   0  -4   2  336.67   17.20
   0  -4   2  354.26   26.10
   0   3  -2 1210.88   40.70
   0   3  -2 1195.58   47.00
   0   3  -2 1253.37   42.50
   0   3  -2 1281.57   58.19
   0   3  -2 1233.68   41.40
   0   3  -2 1207.78   39.40
   0   3  -2 1207.08   42.70
   0  -3   2 1292.37   46.90
   0  -3   2 1268.67   41.10
   0  -3   2 1215.08   37.20
   0  -3   2 1269.17   43.70
   0   0  -2  747.83   21.10
   0   0  -2  683.73   21.30
   0   0  -2  733.23   21.20
   0   0  -2  713.93   24.30
   0   0   2  753.22   24.00
   0   0   2  717.93   21.30
   0   0   2  856.21   21.70
   0   0   2  723.53   21.20
   0  -3  -2 1253.57   44.10
   0  -3  -2 1228.38   48.40
   0  -3  -2 1142.39   47.50
   0  -3  -2 1251.07   46.60
   0  -3  -2 1256.17   46.40
   0  -3  -2 1185.38   44.80
   0   3   2 1181.08   43.40
   0   3   2 1254.27   46.30
   0   3   2 1308.07   55.29
   0   3   2 1244.88   42.30
   0   3   2 1255.87   47.40
   0   3   2 1283.67   47.80
   0   3   2 1239.08   47.70
   0  -4  -2  374.26   29.10
   0  -4  -2  369.76   34.90
   0  -4  -2  320.37   30.00
   0  -4  -2  328.97   33.10
   0   4   2  312.47   34.90
   0   4   2  342.77   33.40
   0   4   2  371.16   32.80
   0   4   2  342.27   42.50
   0   4   2  366.36   28.50
   0   4   2  374.86   28.90
   0   4   2  368.76   32.00
   0  -5  -2 1596.64   58.79
   0  -5  -2 1484.65   63.19
   0  -5  -2 1525.75   59.09
   0  -5  -2 1465.15   48.80
   0   5   2 1478.95   59.69
   0   5   2 1479.45   75.49
   0   5   2 1472.65   56.89
   0   5   2 1548.45   63.29
   0   5   2 1482.85   61.99
   0   5   2 1441.16   61.29
   0  -6  -2  343.67   24.70
   0  -6  -2  405.06   38.60
   0  -6  -2  457.45   40.90
   0  -6  -2  337.67   42.00
   0  -6  -2  478.05   43.10
   0   6   2  337.87   46.10
   0   6   2  394.66   40.20
   0   6   2  344.77   55.49
   0   6   2  348.07   39.40
   0   6   2  381.36   43.90
   0   6   2  397.26   36.00
   0   6   2  388.96   42.20
   1   6  -2  132.99   24.00
   1   6  -2  123.89   21.70
   1   6  -2  145.69   28.30
   1   6  -2  113.39   20.90
   1   6  -2   84.19   25.20
   1   6  -2   98.69   31.30
   1   6  -2  148.09   27.70
  -1  -6   2  173.58   26.60
  -1  -6   2  138.09   28.30
  -1  -6   2  159.18   27.30
  -1  -6   2  182.38   38.70
   1   5  -2  328.17   33.10
   1   5  -2  377.46   29.90
   1   5  -2  389.36   36.40
   1   5  -2  344.57   30.40
   1   5  -2  373.26   51.69
   1   5  -2  314.57   34.20
   1   5  -2  355.56   54.69
  -1  -5   2  350.86   36.10
  -1  -5   2  390.06   32.70
  -1  -5   2  338.57   37.90
   1   4  -2  405.96   30.10
   1   4  -2  416.86   33.20
   1   4  -2  392.26   29.30
   1   4  -2  366.16   28.40
   1   4  -2  365.76   43.80
   1   4  -2  358.76   23.40
   1   4  -2  345.97   25.70
  -1  -4   2  376.26   32.10
  -1  -4   2  326.77   30.80
  -1  -4   2  401.06   27.40
   1   3  -2  788.92   30.10
   1   3  -2  777.92   29.60
   1   3  -2  778.22   36.00
   1   3  -2  803.52   32.60
   1   3  -2  785.62   33.50
   1   3  -2  749.82   33.20
   1   3  -2  808.12   47.80
  -1  -3   2  729.63   30.50
  -1  -3   2  721.23   33.80
  -1  -3   2  817.72   35.70
   1  -3  -2  777.22   35.50
   1  -3  -2  769.72   38.00
   1  -3  -2  719.83   37.90
   1  -3  -2  759.82   33.30
   1  -3  -2  693.83   34.30
   1  -3  -2  804.72   34.90
  -1   3   2  798.02   38.40
  -1   3   2  773.92   37.40
  -1   3   2  790.02   33.50
  -1   3   2  757.92   45.30
  -1   3   2  798.92   36.90
  -1   3   2  737.73   33.80
  -1   3   2  824.42   35.50
   1  -4  -2  338.17   29.80
   1  -4  -2  330.77   33.10
   1  -4  -2  370.96   29.20
   1  -4  -2  317.47   35.00
   1  -4  -2  353.96   34.40
   1  -4  -2  373.66   23.50
  -1   4   2  336.67   28.30
  -1   4   2  369.06   30.90
  -1   4   2  353.76   29.60
  -1   4   2  356.06   33.20
  -1   4   2  370.36   34.90
  -1   4   2  339.67   43.30
  -1   4   2  380.76   32.90
   1  -5  -2  383.66   50.19
   1  -5  -2  357.26   40.80
   1  -5  -2  294.37   25.00
   1  -5  -2  301.97   39.70
   1  -5  -2  345.67   36.60
  -1   5   2  394.86   41.00
  -1   5   2  338.27   38.50
  -1   5   2  353.96   33.80
  -1   5   2  311.37   41.10
  -1   5   2  337.47   39.40
  -1   5   2  362.46   35.60
  -1   5   2  371.66   52.79
   1  -6  -2  136.29   18.00
   1  -6  -2  178.78   30.50
   1  -6  -2  169.48   27.10
   1  -6  -2  146.09   33.10
   1  -6  -2  159.28   27.80
  -1   6   2  136.29   29.60
  -1   6   2  136.99   29.80
  -1   6   2  172.98   27.00
  -1   6   2  114.89   23.60
  -1   6   2  187.98   32.90
  -1   6   2  103.29   31.40
  -1   6   2  148.89   24.40
   2   6  -2  398.16   34.50
   2   6  -2  340.07   36.90
   2   6  -2  325.27   36.10
   2   6  -2  369.16   32.60
   2   6  -2  369.26   40.20
   2   6  -2  301.97   54.69
   2   6  -2  295.37   39.90
  -2  -6   2  335.37   41.00
  -2  -6   2  408.16   36.10
  -2  -6   2  417.76   41.10
  -2  -6   2  439.76   40.00
   2   5  -2  789.12   43.20
   2   5  -2  811.02   45.80
   2   5  -2  812.32   44.00
   2   5  -2  824.02   44.80
   2   5  -2  747.83   60.09
   2   5  -2  796.52   37.80
  -2  -5   2  815.32   45.50
  -2  -5   2  821.92   48.90
  -2  -5   2  794.12   44.10
  -2  -5   2  787.02   40.60
   2   4  -2 1718.43   54.89
   2   4  -2 1637.04   58.69
   2   4  -2 1668.53   54.29
   2   4  -2 1676.43   56.99
   2   4  -2 1668.13   59.89
   2   4  -2 1746.23   72.99
   2   4  -2 1727.93   58.49
  -2  -4   2 1712.83   59.19
  -2  -4   2 1617.24   57.99
  -2  -4   2 1687.53   55.79
  -2  -4   2 1730.53   60.49
   2   3  -2 6445.56  179.18
   2   3  -2 6732.03  178.48
   2   3  -2 7003.10  189.78
   2   3  -2 6447.16  178.38
   2   3  -2 6519.95  178.98
  -2  -3   2 6266.17  189.68
  -2  -3   2 6484.95  178.08
  -2  -3   2 6456.65  178.08
  -2  -3   2 6695.83  179.78
  -2  -3   2 6591.24  176.48
   2   2  -2 5395.76  146.59
   2   2  -2 5084.99  138.49
  -2  -2   2 5333.77  147.39
  -2  -2   2 4903.91  137.99
  -2  -2   2 4882.21  137.99
   2  -2  -2 5296.87  137.99
   2  -2  -2 5089.99  139.79
   2  -2  -2 5022.90  139.69
  -2   2   2 5190.38  140.19
  -2   2   2 5060.19  138.19
  -2   2   2 4836.02  139.19
  -2   2   2 5185.28  137.49
  -2   2   2 4965.00  139.19
   2  -3  -2 6432.96  173.88
   2  -3  -2 6035.40  172.98
   2  -3  -2 6683.53  173.48
   2  -3  -2 6505.25  176.48
   2  -3  -2 6316.87  177.18
   2  -3  -2 6282.57  175.78
  -2   3   2 6479.45  177.18
  -2   3   2 6440.96  184.08
  -2   3   2 6408.56  175.38
  -2   3   2 6238.08  175.48
  -2   3   2 6277.27  173.28
  -2   3   2 6500.05  173.08
  -2   3   2 6399.96  173.98
   2  -4  -2 1661.63   54.49
   2  -4  -2 1755.02   62.29
   2  -4  -2 1663.33   61.79
   2  -4  -2 1703.33   62.69
   2  -4  -2 1695.63   57.09
   2  -4  -2 1643.54   57.79
   2  -4  -2 1641.44   55.89
  -2   4   2 1632.34   60.39
  -2   4   2 1633.24   60.49
  -2   4   2 1648.94   57.89
  -2   4   2 1710.43   72.79
  -2   4   2 1687.03   56.79
  -2   4   2 1637.34   57.09
  -2   4   2 1729.23   63.19
   2  -5  -2  755.82   47.50
   2  -5  -2  758.42   35.70
   2  -5  -2  789.92   45.10
   2  -5  -2  774.12   49.90
   2  -5  -2  752.82   48.30
  -2   5   2  729.93   46.20
  -2   5   2  705.13   41.80
  -2   5   2  731.13   60.29
  -2   5   2  881.21   50.59
  -2   5   2  794.92   42.10
  -2   5   2  778.72   42.70
  -2   5   2  760.42   40.20
   2  -6  -2  333.27   42.70
   2  -6  -2  336.27   26.60
   2  -6  -2  358.66   44.00
   2  -6  -2  375.06   36.30
  -2   6   2  327.57   34.60
  -2   6   2  315.57   43.50
  -2   6   2  379.56   41.40
  -2   6   2  379.06   35.90
  -2   6   2  363.46   58.39
  -2   6   2  387.76   37.60
  -2   6   2  340.57   44.70
   3   6  -2  152.48   22.20
   3   6  -2  244.28   31.70
   3   6  -2  195.38   24.50
   3   6  -2  189.18   30.20
   3   6  -2  126.69   31.60
   3   6  -2  155.98   28.20
   3   6  -2  181.48   27.20
  -3  -6   2  244.68   27.70
  -3  -6   2  219.98   32.50
  -3  -6   2  303.47   38.40
  -3  -6   2  186.78   28.10
   3   5  -2 1021.40   65.89
   3   5  -2 1082.09   44.10
   3   5  -2 1048.60   49.20
   3   5  -2 1043.90   50.49
   3   5  -2 1038.70   50.89
   3   5  -2 1119.79   50.19
   3   5  -2 1055.39   44.70
  -3  -5   2  954.00   49.10
  -3  -5   2 1032.30   49.80
  -3  -5   2 1037.90   51.59
  -3  -5   2 1087.79   49.20
   3   4  -2  578.74   30.90
   3   4  -2  593.44   48.40
   3   4  -2  561.44   36.70
   3   4  -2  515.05   36.00
   3   4  -2  559.34   33.20
   3   4  -2  581.04   34.00
   3   4  -2  544.55   28.30
  -3  -4   2  539.15   35.20
  -3  -4   2  556.64   32.20
  -3  -4   2  608.64   42.00
  -3  -4   2  591.04   35.30
  -3  -4   2  512.55   33.20
  -3  -4   2  529.05   51.79
   3   3  -2  677.63   27.30
   3   3  -2  635.14   32.50
   3   3  -2  597.84   33.50
   3   3  -2  619.84   28.60
   3   3  -2  709.53   43.70
   3   3  -2  711.23   31.10
  -3  -3   2  668.43   31.30
  -3  -3   2  662.03   31.90
  -3  -3   2  556.84   45.50
  -3  -3   2  660.63   32.60
  -3  -3   2  669.53   29.20
   3   2  -2 1369.66   52.69
   3   2  -2 1353.46   41.40
   3   2  -2 1336.57   40.50
   3   2  -2 1258.67   44.30
   3   2  -2 1336.47   41.90
  -3  -2   2 1332.57   43.60
  -3  -2   2 1309.97   42.90
  -3  -2   2 1304.57   42.70
  -3  -2   2 1300.07   54.29
  -3  -2   2 1226.28   41.40
   3  -2  -2 1301.67   46.20
   3  -2  -2 1287.07   46.10
   3  -2  -2 1316.17   43.30
   3  -2  -2 1331.87   42.00
   3  -2  -2 1295.47   44.60
   3  -2  -2 1312.07   44.50
   3  -2  -2 1268.37   45.80
  -3   2   2 1274.67   45.00
  -3   2   2 1249.28   44.00
  -3   2   2 1343.87   47.20
  -3   2   2 1273.27   43.50
  -3   2   2 1297.87   45.10
  -3   2   2 1277.97   41.30
  -3   2   2 1243.58   49.40
   3  -3  -2  657.33   29.50
   3  -3  -2  637.54   35.10
   3  -3  -2  684.73   31.40
   3  -3  -2  656.73   29.20
   3  -3  -2  637.04   31.70
   3  -3  -2  660.73   35.80
   3  -3  -2  678.03   35.10
  -3   3   2  705.93   41.30
  -3   3   2  642.94   36.60
  -3   3   2  683.13   31.70
  -3   3   2  669.53   32.70
  -3   3   2  681.53   34.20
  -3   3   2  632.94   31.40
   3  -4  -2  563.44   33.80
   3  -4  -2  564.54   30.00
   3  -4  -2  519.65   39.10
   3  -4  -2  501.05   30.80
   3  -4  -2  522.85   37.50
   3  -4  -2  543.85   30.00
   3  -4  -2  510.75   38.20
  -3   4   2  549.05   34.50
  -3   4   2  555.14   40.20
  -3   4   2  519.05   36.60
  -3   4   2  570.94   30.40
  -3   4   2  564.54   35.80
  -3   4   2  566.84   50.19
  -3   4   2  550.24   33.00
   3  -5  -2 1094.49   69.69
   3  -5  -2 1003.20   43.30
   3  -5  -2 1057.69   53.39
   3  -5  -2 1098.59   50.49
   3  -5  -2 1027.20   54.29
   3  -5  -2 1026.40   53.39
  -3   5   2 1013.90   48.00
  -3   5   2 1003.10   42.80
  -3   5   2  988.10   67.49
  -3   5   2  991.60   50.69
  -3   5   2 1038.00   54.69
  -3   5   2 1025.90   53.29
  -3   5   2 1048.00   51.89
   3  -6  -2  159.18   26.40
   3  -6  -2  138.09   30.70
   3  -6  -2  228.28   36.60
   3  -6  -2  225.18   29.60
   3  -6  -2  220.78   27.70
  -3   6   2  134.39   32.90
  -3   6   2  172.38   25.50
  -3   6   2  166.28   28.70
  -3   6   2  186.98   29.00
  -3   6   2  161.38   30.90
  -3   6   2  179.38   25.70
  -3   6   2  289.47   43.60
   4   6  -2   85.59   25.10
   4   6  -2   86.79   25.20
   4   6  -2   22.80   27.90
   4   6  -2   68.59   21.20
   4   6  -2   65.89   26.90
   4   6  -2   67.59   20.20
   4   6  -2   82.69   28.10
  -4  -6   2   84.29   24.90
  -4  -6   2   95.69   22.70
  -4  -6   2   94.79   26.10
  -4  -6   2   96.49   26.60
  -4  -6   2   82.39   25.00
   4   5  -2 2732.53   87.69
   4   5  -2 2640.24   82.99
   4   5  -2 2722.33  105.09
   4   5  -2 2699.43   90.99
   4   5  -2 2679.43   84.29
   4   5  -2 2700.23   89.69
   4   5  -2 2651.63   87.59
  -4  -5   2 2666.53   89.19
  -4  -5   2 2695.13   83.79
  -4  -5   2 2704.83   88.59
  -4  -5   2 2728.53   87.69
  -4  -5   2 2764.52   86.09
   4   4  -2  235.68   25.90
   4   4  -2  250.77   25.60
   4   4  -2  193.98   28.60
   4   4  -2  208.18   28.40
   4   4  -2  218.08   33.60
   4   4  -2  234.98   23.80
   4   4  -2  224.38   43.10
  -4  -4   2  226.68   31.20
  -4  -4   2  268.67   24.70
  -4  -4   2  233.18   34.80
  -4  -4   2  246.88   25.40
  -4  -4   2  266.67   29.30
  -4  -4   2  222.48   28.70
   4   3  -2 1408.66   48.10
   4   3  -2 1371.66   45.20
   4   3  -2 1371.96   45.80
   4   3  -2 1352.06   44.20
  -4  -3   2 1321.17   44.10
  -4  -3   2 1284.17   61.09
  -4  -3   2 1385.56   45.20
  -4  -3   2 1370.06   48.40
  -4  -3   2 1356.26   47.20
  -4  -3   2 1298.97   47.00
   4  -2  -2 8184.98  215.18
  -4   2   2 7764.42  217.58
   4  -3  -2 1302.37   46.40
   4  -3  -2 1292.67   44.60
   4  -3  -2 1314.37   43.00
   4  -3  -2 1266.07   48.70
   4  -3  -2 1274.97   47.20
   4  -3  -2 1371.76   47.30
   4  -3  -2 1345.07   50.69
  -4   3   2 1336.97   45.00
  -4   3   2 1328.17   54.59
  -4   3   2 1305.97   51.09
  -4   3   2 1323.27   47.00
  -4   3   2 1317.17   42.60
  -4   3   2 1251.27   47.70
  -4   3   2 1267.57   47.60
   4  -4  -2  227.48   27.70
   4  -4  -2  204.88   27.90
   4  -4  -2  198.08   22.30
   4  -4  -2  212.88   25.60
   4  -4  -2  214.08   27.30
   4  -4  -2  197.38   28.70
   4  -4  -2  224.28   24.00
  -4   4   2  214.18   27.10
  -4   4   2  160.28   29.00
  -4   4   2  236.58   36.20
  -4   4   2  174.08   22.50
  -4   4   2  252.67   33.90
  -4   4   2  201.78   23.40
  -4   4   2  206.58   25.00
  -4   4   2  252.07   36.70
   4  -5  -2 2680.63   84.79
   4  -5  -2 2590.34   90.89
   4  -5  -2 2789.12   93.19
   4  -5  -2 2593.14   90.89
   4  -5  -2 2773.52   87.49
   4  -5  -2 2649.63   93.69
  -4   5   2 2693.13   80.49
  -4   5   2 2704.63  100.99
  -4   5   2 2695.83   89.09
  -4   5   2 2670.53   89.19
  -4   5   2 2736.13   88.19
  -4   5   2 2671.83   93.39
  -4   5   2 2794.32  107.59
  -4   5   2 2657.73  107.49
   4  -6  -2   93.39   27.90
   4  -6  -2   66.19   28.70
   4  -6  -2   65.99   23.70
   4  -6  -2   56.59   26.20
   4  -6  -2  108.29   24.70
   4  -6  -2   54.39   22.50
  -4   6   2   86.99   23.20
  -4   6   2   85.89   30.40
  -4   6   2   91.89   23.80
  -4   6   2   92.59   20.60
  -4   6   2   45.20   27.00
  -4   6   2  167.48   44.10
  -4   6   2   35.20   27.40
  -4   6   2   80.99   34.60
   5   6  -2   45.20   21.80
   5   6  -2   85.49   28.30
   5   6  -2   46.80   52.49
   5   6  -2   71.59   29.60
   5   6  -2   80.69   29.60
   5   6  -2   75.49   21.70
  -5  -6   2   92.39   30.00
  -5  -6   2   48.00   22.00
  -5  -6   2   31.50   22.90
  -5  -6   2   81.99   26.00
  -5  -6   2   69.39   26.20
   5   5  -2  642.14   38.10
   5   5  -2  648.44   37.80
   5   5  -2  679.53   45.50
   5   5  -2  641.04   57.49
   5   5  -2  689.33   56.09
   5   5  -2  682.73   44.80
  -5  -5   2  695.13   42.20
  -5  -5   2  648.74   42.20
  -5  -5   2  642.64   43.80
  -5  -5   2  639.94   43.90
  -5  -5   2  692.93   39.50
  -5  -5   2  680.03   64.59
   5   4  -2 1828.72   60.29
   5   4  -2 1698.03   67.39
   5   4  -2 1817.32   76.89
   5   4  -2 1901.11   59.39
   5   4  -2 1722.83   63.79
   5   4  -2 1854.71   66.19
  -5  -4   2 1737.33   59.09
  -5  -4   2 1910.81   78.19
  -5  -4   2 1763.52   62.89
  -5  -4   2 1816.32   63.89
  -5  -4   2 1772.72   62.89
  -5  -4   2 1773.02   81.79
   5   3  -2 2368.56   73.09
   5   3  -2 2536.95   73.29
   5   3  -2 2439.46   85.89
   5   3  -2 2445.56   76.99
  -5  -3   2 2493.25   74.59
  -5  -3   2 2442.46   88.89
  -5  -3   2 2508.85   73.79
  -5  -3   2 2521.85   76.19
  -5  -3   2 2444.56   73.09
  -5  -3   2 2583.74   76.09
   5   2  -2 5046.40  143.79
   5   2  -2 4985.90  134.89
   5   2  -2 4824.92  137.09
   5   2  -2 5005.50  140.39
   5   2  -2 4785.32  136.79
   5   2  -2 4900.81  134.49
  -5  -2   2 4848.81  133.79
  -5  -2   2 5025.50  136.09
  -5  -2   2 4948.41  134.89
  -5  -2   2 4773.92  144.79
  -5  -2   2 5148.39  136.39
   5   1  -2 4198.58  116.29
   5   1  -2 4204.18  115.19
   5   1  -2 4145.08  116.19
   5   1  -2 4223.48  118.69
   5   1  -2 4080.49  115.39
  -5  -1   2 4296.57  115.89
  -5  -1   2 4339.37  115.39
  -5  -1   2 4080.49  115.59
  -5  -1   2 4354.46  116.29
   5   0  -2 1839.92   60.09
   5   0  -2 2010.30   58.59
   5   0  -2 1918.71   62.19
   5   0  -2 1855.81   70.79
   5   0  -2 1954.40   57.89
   5   0  -2 2010.50   58.69
  -5   0   2 2005.10   61.19
  -5   0   2 2087.79   58.59
  -5   0   2 2040.10   58.59
  -5   0   2 2007.50   56.79
  -5   0   2 1980.20   58.29
  -5   0   2 2184.38   64.69
   5  -1  -2 4285.47  116.19
   5  -1  -2 4154.98  115.49
   5  -1  -2 4180.78  115.99
   5  -1  -2 4199.08  115.49
   5  -1  -2 4119.69  117.99
   5  -1  -2 4094.29  115.09
  -5   1   2 4233.78  115.79
  -5   1   2 4297.37  118.29
  -5   1   2 4336.57  115.69
  -5   1   2 4096.79  119.79
   5  -2  -2 4862.91  137.59
   5  -2  -2 5036.90  135.59
   5  -2  -2 4953.90  135.39
   5  -2  -2 4909.11  136.79
   5  -2  -2 5000.90  137.19
   5  -2  -2 4893.31  132.99
   5  -2  -2 4960.20  138.29
  -5   2   2 5057.89  139.79
  -5   2   2 4978.30  138.09
  -5   2   2 4667.53  135.29
  -5   2   2 4752.12  135.59
  -5   2   2 4965.00  135.99
  -5   2   2 4809.62  135.89
   5  -3  -2 2607.44   75.99
   5  -3  -2 2399.76   78.09
   5  -3  -2 2429.86   78.09
   5  -3  -2 2500.85   75.89
   5  -3  -2 2622.24   80.39
   5  -3  -2 2515.45   72.09
   5  -3  -2 2610.54   78.49
  -5   3   2 2511.35   76.89
  -5   3   2 2525.05   76.59
  -5   3   2 2428.46   82.59
  -5   3   2 2445.76   76.69
  -5   3   2 2391.56   74.79
  -5   3   2 2542.35   80.59
   5  -4  -2 1794.12   57.79
   5  -4  -2 1831.12   68.29
   5  -4  -2 1731.83   65.09
   5  -4  -2 1791.12   62.89
   5  -4  -2 1732.23   66.99
   5  -4  -2 1795.22   63.19
   5  -4  -2 1781.62   65.39
  -5   4   2 1828.42   63.49
  -5   4   2 1775.22   68.29
  -5   4   2 1735.53   62.59
  -5   4   2 1718.63   72.09
  -5   4   2 1770.22   64.59
  -5   4   2 1887.11   62.19
   5  -5  -2  630.74   39.00
   5  -5  -2  666.43   47.80
   5  -5  -2  588.44   45.10
   5  -5  -2  698.93   44.20
   5  -5  -2  653.63   39.10
   5  -5  -2  649.34   45.40
  -5   5   2  725.93   57.39
  -5   5   2  769.42   49.80
  -5   5   2  622.04   63.19
  -5   5   2  650.63   46.20
  -5   5   2  702.13   52.19
  -5   5   2  707.83   44.20
  -5   5   2  611.04   42.40
   5  -6  -2   58.19   24.30
   5  -6  -2   56.89   25.50
   5  -6  -2   96.79   33.30
   5  -6  -2   69.09   22.60
   5  -6  -2   15.00   27.30
   5  -6  -2   53.69   43.10
  -5   6   2   20.60   25.80
  -5   6   2   95.79   48.80
  -5   6   2   79.49   34.90
  -5   6   2   63.39   23.70
  -5   6   2   30.00   29.60
  -5   6   2  136.29   45.50
  -5   6   2   55.89   22.90
   6   6  -2   17.20   24.00
   6   6  -2   38.70   30.60
   6   6  -2    3.80   20.70
  -6  -6   2   31.00   25.60
  -6  -6   2   31.40   23.00
  -6  -6   2    3.10   22.30
   6   5  -2   70.49   26.80
   6   5  -2  124.79   30.10
   6   5  -2  136.39   22.20
   6   5  -2   99.39   25.70
   6   5  -2  122.39   27.60
   6   5  -2  112.09   21.60
  -6  -5   2  106.59   23.00
  -6  -5   2   99.99   36.90
  -6  -5   2  114.79   25.30
  -6  -5   2   95.89   25.60
  -6  -5   2   95.89   25.10
  -6  -5   2  101.09   24.10
   6   4  -2  604.74   33.20
   6   4  -2  618.84   35.50
   6   4  -2  551.84   44.60
  -6  -4   2  563.54   33.90
  -6  -4   2  520.65   74.89
  -6  -4   2  582.54   57.09
  -6  -4   2  583.74   65.59
  -6  -4   2  629.34   36.50
  -6  -4   2  572.94   36.40
   6   3  -2 1320.67   41.00
   6   3  -2 1285.97   51.19
   6   3  -2 1298.47   50.39
   6   3  -2 1350.76   59.39
   6   3  -2 1346.77   50.39
   6   3  -2 1345.57   46.40
  -6  -3   2 1411.16   50.09
  -6  -3   2 1369.46   46.80
  -6  -3   2 1351.86   54.09
  -6  -3   2 1350.06   50.59
  -6  -3   2 1347.87   47.00
   6   2  -2 2955.50   91.69
   6   2  -2 2783.72   81.59
   6   2  -2 2891.11   84.59
   6   2  -2 2810.42   80.49
   6   2  -2 2766.62   80.59
   6   2  -2 2743.43   87.49
   6   2  -2 2826.72   84.79
  -6  -2   2 2874.71   81.89
  -6  -2   2 2742.83   93.19
  -6  -2   2 2868.11   87.39
  -6  -2   2 2781.82   80.39
  -6  -2   2 2806.82   82.59
  -6  -2   2 2759.52   82.19
  -6  -2   2 2857.61   83.19
   6   1  -2 3061.39   90.39
   6   1  -2 3059.79   88.39
   6   1  -2 3193.58   89.19
   6   1  -2 3184.98   93.19
   6   1  -2 3297.47   97.09
   6   1  -2 3107.49   90.29
   6   1  -2 3120.89   89.79
  -6  -1   2 3156.48   89.89
  -6  -1   2 3141.49   93.89
  -6  -1   2 3153.88   90.49
  -6  -1   2 3068.69   89.49
  -6  -1   2 3177.88   97.79
  -6  -1   2 3027.80   88.29
  -6  -1   2 3047.79   89.39
   6  -1  -2 3160.28   90.49
   6  -1  -2 3268.07   93.79
   6  -1  -2 2991.00   89.89
   6  -1  -2 3098.79   93.19
   6  -1  -2 3067.69   89.99
   6  -1  -2 3115.59   89.89
  -6   1   2 3113.49   92.89
  -6   1   2 3146.09   90.79
  -6   1   2 3227.08   90.09
  -6   1   2 3094.89   93.59
  -6   1   2 3205.98   90.59
  -6   1   2 3200.58   90.49
  -6   1   2 3035.30   89.09
   6  -2  -2 2952.50   83.29
   6  -2  -2 2833.62   84.19
   6  -2  -2 2837.42   86.49
   6  -2  -2 2893.31   83.59
   6  -2  -2 2796.22   88.69
   6  -2  -2 2852.71   82.89
   6  -2  -2 2807.72   85.09
   6  -2  -2 2712.73   79.59
  -6   2   2 2769.92   82.99
  -6   2   2 2722.93   82.39
  -6   2   2 2776.82   82.29
  -6   2   2 2865.81   85.79
  -6   2   2 2751.72   86.69
  -6   2   2 2836.42   83.69
   6  -3  -2 1357.76   43.90
   6  -3  -2 1187.78   65.09
   6  -3  -2 1342.37   53.19
   6  -3  -2 1365.76   49.30
   6  -3  -2 1380.16   52.09
   6  -3  -2 1376.76   52.09
   6  -3  -2 1421.76   52.09
  -6   3   2 1368.96   50.19
  -6   3   2 1381.36   50.29
  -6   3   2 1384.76   56.89
  -6   3   2 1435.86   55.19
  -6   3   2 1383.36   49.70
  -6   3   2 1332.67   49.90
   6  -4  -2  576.04   38.40
   6  -4  -2  558.04   26.90
   6  -4  -2  668.93   39.30
   6  -4  -2  562.74   40.40
   6  -4  -2  605.24   35.80
   6  -4  -2  556.54   59.79
  -6   4   2  584.34   47.70
  -6   4   2  493.75   64.29
  -6   4   2  547.15   34.70
  -6   4   2  655.73   39.30
   6  -5  -2  156.28   26.50
   6  -5  -2  136.79   23.90
   6  -5  -2  112.29   27.50
   6  -5  -2  111.79   24.40
   6  -5  -2   88.39   23.10
   6  -5  -2   97.19   27.30
  -6   5   2   83.79   32.60
  -6   5   2  107.19   24.10
  -6   5   2   87.89   24.70
  -6   5   2  131.69   26.60
  -6   5   2  113.19   28.90
  -6   5   2  123.69   27.20
  -6   5   2  112.19   36.90
   6  -6  -2   28.60   24.00
   6  -6  -2   -8.70   23.90
   6  -6  -2    5.50   21.50
   6  -6  -2  -17.90   24.40
  -6   6   2   33.20   24.60
  -6   6   2   17.40   31.50
  -6   6   2   40.40   43.80
  -6   6   2    7.80   24.80
  -6   6   2   36.90   37.70
  -6   6   2  -59.09   41.00
   7   6  -2  209.78   34.30
   7   6  -2  105.69   51.99
   7   6  -2  138.39   25.90
   7   6  -2  119.79   32.70
   7   6  -2  140.49   30.90
   7   6  -2  122.59   25.50
  -7  -6   2  168.18   30.40
  -7  -6   2  184.48   29.90
  -7  -6   2  175.58   33.60
  -7  -6   2  211.28   45.30
  -7  -6   2  178.78   29.30
  -7  -6   2  153.88   27.10
   7   5  -2  316.87   32.60
   7   5  -2  304.17   49.90
   7   5  -2  325.37   46.00
   7   5  -2  311.27   32.90
  -7  -5   2  366.86   35.80
  -7  -5   2  341.07   40.30
  -7  -5   2  278.57   36.40
  -7  -5   2  321.97   37.60
  -7  -5   2  300.37   40.20
   7   4  -2  842.92   56.89
   7   4  -2  884.41   69.79
   7   4  -2  886.11   40.50
   7   4  -2  830.42   40.90
   7   4  -2  873.21   47.20
  -7  -4   2  804.62   63.99
  -7  -4   2  879.31   41.30
  -7  -4   2  852.91   41.40
  -7  -4   2  768.22   46.00
  -7  -4   2  923.11   45.30
  -7  -4   2  817.32   42.80
   7   3  -2 1213.48   54.29
   7   3  -2 1328.67   59.59
   7   3  -2 1258.87   50.29
   7   3  -2 1293.37   47.00
   7   3  -2 1277.37   44.40
   7   3  -2 1183.98   51.39
   7   3  -2 1318.87   43.90
  -7  -3   2 1256.57   48.10
  -7  -3   2 1196.28   45.90
  -7  -3   2 1264.57   48.70
  -7  -3   2 1279.77   47.30
  -7  -3   2 1185.98   63.99
  -7  -3   2 1252.87   45.10
   7   2  -2  810.42   35.80
   7   2  -2  738.23   40.40
   7   2  -2  862.71   45.30
   7   2  -2  788.52   37.80
   7   2  -2  864.61   34.60
   7   2  -2  799.72   32.70
   7   2  -2  771.62   33.50
  -7  -2   2  787.32   33.30
  -7  -2   2  734.73   32.20
  -7  -2   2  811.22   36.30
  -7  -2   2  803.92   36.70
  -7  -2   2  842.02   31.40
  -7  -2   2  826.52   36.70
  -7  -2   2  750.62   47.50
   7   1  -2  974.00   38.60
   7   1  -2  957.10   42.80
   7   1  -2  945.21   38.90
   7   1  -2 1032.00   39.00
   7   1  -2  994.10   40.40
   7   1  -2 1078.69   47.90
   7   1  -2 1027.80   38.80
  -7  -1   2  999.10   40.70
  -7  -1   2 1031.60   49.50
  -7  -1   2  950.00   36.80
  -7  -1   2  969.60   44.90
  -7  -1   2 1040.30   39.70
  -7  -1   2  997.50   40.40
  -7  -1   2  938.01   40.50
   7   0  -2  135.69   17.30
   7   0  -2  258.57   26.10
   7   0  -2  198.48   20.30
   7   0  -2  171.88   22.70
   7   0  -2  188.28   26.80
   7   0  -2  187.68   22.40
  -7   0   2  195.08   28.30
  -7   0   2  154.38   20.50
  -7   0   2  201.88   33.40
  -7   0   2  182.28   22.50
  -7   0   2  194.38   24.20
  -7   0   2  167.48   19.80
  -7   0   2  153.38   18.90
  -7   0   2  204.68   25.40
   7  -1  -2 1014.50   44.40
   7  -1  -2 1024.90   38.20
   7  -1  -2  965.70   43.00
   7  -1  -2  997.00   40.00
   7  -1  -2  978.70   38.20
   7  -1  -2 1006.60   39.80
  -7   1   2  998.50   41.20
  -7   1   2  951.50   38.40
  -7   1   2 1055.69   38.20
  -7   1   2 1007.20   40.50
  -7   1   2 1013.60   43.20
  -7   1   2 1024.00   39.60
  -7   1   2  960.30   44.20
   7  -2  -2  802.92   38.60
   7  -2  -2  817.92   34.30
   7  -2  -2  794.32   35.30
   7  -2  -2  842.32   38.20
   7  -2  -2  832.72   37.70
   7  -2  -2  837.82   40.30
   7  -2  -2  762.62   43.30
   7  -2  -2  822.62   36.00
  -7   2   2  838.82   40.60
  -7   2   2  849.61   36.70
  -7   2   2  790.32   39.40
  -7   2   2  806.62   40.70
  -7   2   2  860.61   38.20
  -7   2   2  841.42   34.90
   7  -3  -2 1304.97   52.79
   7  -3  -2 1308.87   48.70
   7  -3  -2 1282.47   52.39
   7  -3  -2 1381.56   49.30
   7  -3  -2 1288.67   51.49
   7  -3  -2 1213.58   50.89
   7  -3  -2 1319.17   42.60
  -7   3   2 1227.28   49.60
  -7   3   2 1234.48   49.50
  -7   3   2 1347.07   55.19
  -7   3   2 1316.77   49.99
  -7   3   2 1192.48   54.69
  -7   3   2 1317.87   54.59
   7  -4  -2  850.41   46.40
   7  -4  -2  843.52   31.90
   7  -4  -2  904.81   47.60
   7  -4  -2  848.02   43.10
   7  -4  -2  847.32   49.30
   7  -4  -2  843.92   42.40
  -7   4   2  887.31   45.70
  -7   4   2  922.31   44.00
  -7   4   2  832.42   51.89
  -7   4   2  793.62   91.09
  -7   4   2  815.52   44.60
  -7   4   2  855.71   55.89
   7  -5  -2  359.96   41.10
   7  -5  -2  241.18   40.30
   7  -5  -2  327.97   35.10
   7  -5  -2  332.87   40.70
   7  -5  -2  295.47   34.50
   7  -5  -2  362.56   38.30
  -7   5   2  384.86   52.69
  -7   5   2  299.07   37.70
  -7   5   2  367.16   45.50
  -7   5   2  295.67   36.20
  -7   5   2  381.26   38.60
   7  -6  -2  139.69   27.70
   7  -6  -2  164.98   28.60
   7  -6  -2  150.58   33.80
   7  -6  -2  211.68   39.30
   7  -6  -2  121.79   30.20
   7  -6  -2  144.39   30.90
  -7   6   2   45.20   28.60
  -7   6   2  206.48   50.09
  -7   6   2  171.18   47.60
  -7   6   2   76.69   33.80
  -7   6   2  142.79   27.90
  -7   6   2  126.99   27.00
  -7   6   2  160.68   73.49
   8   6  -2   31.80   35.20
   8   6  -2   23.40   23.70
   8   6  -2    2.30   22.70
  -8  -6   2   20.30   28.40
  -8  -6   2   65.49   26.50
  -8  -6   2   31.20   24.90
  -8  -6   2   67.89   28.70
  -8  -6   2   34.60   25.70
   8   5  -2   99.99   23.20
   8   5  -2   92.99   23.20
   8   5  -2   78.29   29.40
   8   5  -2   77.69   30.90
   8   5  -2  149.79   33.90
   8   5  -2  143.59   30.00
  -8  -5   2  127.79   27.80
  -8  -5   2   99.39   25.50
  -8  -5   2  101.29   26.80
  -8  -5   2  148.09   26.50
  -8  -5   2   64.89   38.10
  -8  -5   2  118.89   26.60
   8   4  -2  377.46   45.30
   8   4  -2  427.46   33.20
   8   4  -2  444.96   46.50
   8   4  -2  404.06   49.40
   8   4  -2  396.36   33.80
  -8  -4   2  376.16   58.89
  -8  -4   2  405.56   34.60
  -8  -4   2  420.16   39.40
  -8  -4   2  423.96   39.30
  -8  -4   2  410.76   37.70
  -8  -4   2  391.06   33.40
   8   3  -2 1171.08   59.89
   8   3  -2 1209.58   51.59
   8   3  -2 1134.99   53.79
   8   3  -2 1155.08   46.00
   8   3  -2 1186.98   52.39
   8   3  -2 1178.78   42.40
   8   3  -2 1262.37   46.00
  -8  -3   2 1034.10   63.69
  -8  -3   2 1160.28   44.20
  -8  -3   2 1171.68   46.60
  -8  -3   2 1181.48   48.90
  -8  -3   2 1128.89   49.20
  -8  -3   2 1198.18   47.80
   8   2  -2 1926.21   67.69
   8   2  -2 2105.39   68.49
   8   2  -2 2072.49   63.69
   8   2  -2 2067.19   64.79
   8   2  -2 2042.50   70.69
   8   2  -2 1979.90   74.79
   8   2  -2 2076.39   64.49
  -8  -2   2 2095.69   66.29
  -8  -2   2 2058.09   64.69
  -8  -2   2 2029.30   66.29
  -8  -2   2 2034.30   65.69
  -8  -2   2 2048.90   65.19
  -8  -2   2 2038.60   61.89
   8   1  -2  650.23   33.20
   8   1  -2  686.63   34.30
   8   1  -2  718.93   42.50
   8   1  -2  660.83   31.40
   8   1  -2  775.52   34.40
   8   1  -2  672.63   37.00
   8   1  -2  686.43   36.10
  -8  -1   2  718.73   35.80
  -8  -1   2  684.13   36.00
  -8  -1   2  721.83   34.80
  -8  -1   2  760.22   47.10
  -8  -1   2  697.03   35.60
  -8  -1   2  676.53   40.00
   8   0  -2   27.50   15.30
   8   0  -2   50.19   16.60
   8   0  -2   43.70   15.30
   8   0  -2   76.19   19.60
   8   0  -2   48.10   17.20
   8   0  -2   49.99   20.70
  -8   0   2   42.90   18.10
  -8   0   2   44.50   23.00
  -8   0   2   51.39   18.20
  -8   0   2   62.29   15.90
  -8   0   2   38.40   18.80
  -8   0   2   52.59   17.30
  -8   0   2   51.39   18.30
  -8   0   2   55.49   15.90
   8  -1  -2  734.43   33.00
   8  -1  -2  671.83   38.20
   8  -1  -2  740.53   35.00
   8  -1  -2  722.23   34.90
   8  -1  -2  717.03   38.30
   8  -1  -2  690.53   32.60
  -8   1   2  750.52   35.30
  -8   1   2  708.13   32.70
  -8   1   2  690.13   40.00
  -8   1   2  730.73   35.50
  -8   1   2  733.43   35.90
  -8   1   2  719.03   38.40
  -8   1   2  746.93   35.90
   8  -2  -2 2043.60   71.09
   8  -2  -2 2093.79   68.89
   8  -2  -2 2184.38   68.49
   8  -2  -2 2063.89   66.79
   8  -2  -2 2150.18   68.39
   8  -2  -2 2058.19   72.99
   8  -2  -2 2075.69   65.79
  -8   2   2 2052.29   70.79
  -8   2   2 2124.59   70.39
  -8   2   2 2009.70   67.49
  -8   2   2 1982.30   65.59
  -8   2   2 2149.78   67.69
   8  -3  -2 1201.18   48.40
   8  -3  -2 1200.48   52.69
   8  -3  -2 1198.78   48.40
   8  -3  -2 1246.28   52.69
   8  -3  -2 1180.88   50.49
   8  -3  -2 1188.78   46.00
   8  -3  -2 1214.08   51.19
  -8   3   2 1177.88   46.70
  -8   3   2 1073.69   48.20
  -8   3   2 1146.99   54.89
  -8   3   2 1184.78   49.50
  -8   3   2 1250.47   50.69
  -8   3   2 1233.28   54.79
   8  -4  -2  463.95   36.10
   8  -4  -2  402.56   41.70
   8  -4  -2  419.46   42.70
   8  -4  -2  405.96   36.60
   8  -4  -2  407.36   35.80
   8  -4  -2  399.26   21.90
   8  -4  -2  457.45   39.60
  -8   4   2  414.86   37.20
  -8   4   2  424.86   45.30
  -8   4   2  436.06   46.40
  -8   4   2  418.76   40.40
  -8   4   2  377.76   37.60
  -8   4   2  447.36   38.40
   8  -5  -2   77.49   26.70
   8  -5  -2  110.99   26.30
   8  -5  -2  134.49   32.40
   8  -5  -2  111.89   25.60
   8  -5  -2  197.58   32.90
   8  -5  -2  111.09   26.40
  -8   5   2  115.79   42.50
  -8   5   2   81.79   25.20
  -8   5   2  125.39   25.50
  -8   5   2   79.59   26.20
  -8   5   2  117.19   31.30
   8  -6  -2   14.00   27.40
   8  -6  -2   23.50   24.80
   8  -6  -2   21.50   26.10
   8  -6  -2   43.00   28.60
  -8   6   2  -59.99   27.00
  -8   6   2   77.49   32.60
  -8   6   2    9.10   43.30
  -8   6   2   43.80   26.50
  -8   6   2   74.09   27.10
   9   5  -2   77.09   33.90
   9   5  -2   41.40   31.70
   9   5  -2   31.00   25.10
   9   5  -2   65.99   36.60
   9   5  -2   47.20   28.50
   9   5  -2   98.49   31.90
   9   5  -2   69.89   24.30
  -9  -5   2   80.99   27.90
  -9  -5   2   78.99   37.90
  -9  -5   2  122.89   29.80
  -9  -5   2   47.40   25.30
  -9  -5   2   73.79   26.80
  -9  -5   2   53.99   38.40
   9   4  -2  160.68   23.90
   9   4  -2  140.69   29.60
   9   4  -2  158.58   23.80
   9   4  -2  180.18   29.90
   9   4  -2  185.08   37.30
   9   4  -2  108.49   29.20
  -9  -4   2  178.58   24.20
  -9  -4   2  115.89   36.00
  -9  -4   2  127.39   26.70
  -9  -4   2  180.38   28.20
  -9  -4   2  169.48   38.70
  -9  -4   2  128.89   25.20
   9   3  -2  867.91   47.90
   9   3  -2  869.41   39.30
   9   3  -2  909.91   42.10
   9   3  -2  939.51   49.10
   9   3  -2  896.71   70.99
   9   3  -2  854.91   50.49
  -9  -3   2  872.81   39.90
  -9  -3   2  947.41   45.00
  -9  -3   2 1018.00   65.49
  -9  -3   2  888.91   86.19
  -9  -3   2  929.61   45.70
   9   2  -2  708.73   41.40
   9   2  -2  687.33   42.10
   9   2  -2  733.13   47.60
   9   2  -2  681.03   35.00
   9   2  -2  764.72   39.00
   9   2  -2  690.33   35.60
   9   2  -2  663.63   40.20
  -9  -2   2  739.83   39.40
  -9  -2   2  644.64   52.99
  -9  -2   2  707.13   36.40
  -9  -2   2  686.43   37.00
  -9  -2   2  716.63   38.20
  -9  -2   2  666.53   38.30
   9   1  -2 1078.39   45.90
   9   1  -2 1095.99   44.90
   9   1  -2 1116.09   43.00
   9   1  -2 1103.69   41.40
   9   1  -2 1044.60   52.29
   9   1  -2 1103.79   45.80
   9   1  -2 1063.69   46.10
  -9  -1   2 1082.49   45.90
  -9  -1   2 1083.29   43.10
  -9  -1   2 1080.99   43.70
  -9  -1   2 1071.09   45.10
  -9  -1   2 1099.99   43.70
  -9  -1   2 1075.29   55.49
  -9  -1   2 1028.80   48.90
   9   0  -2  933.41   41.30
   9   0  -2  870.91   41.50
   9   0  -2  934.21   40.20
   9   0  -2  938.31   42.70
   9   0  -2  923.61   41.30
   9   0  -2  902.21   37.70
  -9   0   2  912.31   38.70
  -9   0   2  925.91   40.50
  -9   0   2  880.21   44.00
  -9   0   2  879.31   50.39
  -9   0   2  915.81   39.10
  -9   0   2  954.80   42.00
  -9   0   2 1011.60   45.60
  -9   0   2  911.31   38.00
   9  -1  -2 1050.19   42.40
   9  -1  -2 1157.78   44.80
   9  -1  -2 1088.69   44.50
   9  -1  -2 1070.39   47.70
   9  -1  -2 1059.39   42.30
   9  -1  -2 1010.30   47.10
  -9   1   2 1084.79   44.80
  -9   1   2 1065.59   47.20
  -9   1   2 1156.68   49.90
  -9   1   2 1088.69   42.60
  -9   1   2 1142.49   44.60
  -9   1   2 1081.79   45.60
  -9   1   2 1119.59   43.20
   9  -2  -2  724.93   38.90
   9  -2  -2  663.83   43.70
   9  -2  -2  712.43   37.50
   9  -2  -2  704.93   42.00
   9  -2  -2  770.02   39.00
   9  -2  -2  740.53   37.20
  -9   2   2  707.53   41.90
  -9   2   2  706.63   41.80
  -9   2   2  661.13   37.50
  -9   2   2  674.43   38.60
  -9   2   2  712.73   35.10
  -9   2   2  728.23   38.50
   9  -3  -2  934.11   49.99
   9  -3  -2  894.91   44.60
   9  -3  -2  852.31   43.40
   9  -3  -2  946.31   48.50
   9  -3  -2 1030.70   69.69
   9  -3  -2  845.82   41.10
   9  -3  -2  950.80   37.70
  -9   3   2  865.81   45.30
  -9   3   2  944.01   50.79
  -9   3   2 1008.30   51.49
  -9   3   2  861.01   47.70
  -9   3   2  933.41   45.40
   9  -4  -2  189.78   32.00
   9  -4  -2  142.39   24.80
   9  -4  -2  153.38   28.50
   9  -4  -2  158.18   17.40
   9  -4  -2  181.28   29.40
   9  -4  -2  113.09   25.20
   9  -4  -2  150.08   25.30
  -9   4   2  152.98   30.80
  -9   4   2  127.89   26.90
  -9   4   2  154.38   27.00
  -9   4   2  101.09   32.60
  -9   4   2  117.49   27.30
  -9   4   2  185.48   28.90
   9  -5  -2   66.39   30.60
   9  -5  -2   78.19   28.50
   9  -5  -2   67.79   25.10
   9  -5  -2  110.09   28.10
   9  -5  -2   72.59   23.70
   9  -5  -2   83.99   32.10
  -9   5   2   18.60   27.50
  -9   5   2   78.29   59.29
  -9   5   2  119.29   28.10
  -9   5   2   21.40   26.90
  -9   5   2   71.29   26.60
  -9   5   2   90.19   32.90
  10   5  -2   63.59   24.70
  10   5  -2  115.59   32.40
  10   5  -2   51.39   54.29
  10   5  -2   84.89   35.70
  10   5  -2   96.79   34.20
  10   5  -2   76.19   26.50
 -10  -5   2  137.09   33.00
 -10  -5   2  111.89   49.70
 -10  -5   2  111.19   27.30
 -10  -5   2   95.29   30.10
 -10  -5   2  126.49   29.90
  10   4  -2   81.99   30.20
  10   4  -2   99.99   33.00
  10   4  -2   57.99   22.90
  10   4  -2   46.60   25.70
  10   4  -2   60.59   22.60
  10   4  -2   66.89   35.70
 -10  -4   2   85.09   26.30
 -10  -4   2   59.49   25.70
 -10  -4   2   85.09   27.80
 -10  -4   2   63.99   24.60
 -10  -4   2   70.49   38.80
 -10  -4   2   81.89   21.60
  10   3  -2   43.60   26.60
  10   3  -2   15.20   26.00
  10   3  -2   35.10   26.80
  10   3  -2   15.70   18.90
  10   3  -2   14.90   19.00
  10   3  -2   19.30   28.60
  10   3  -2   40.00   18.90
  10   3  -2   62.69   55.29
 -10  -3   2   22.20   17.80
 -10  -3   2   46.00   23.50
 -10  -3   2   18.70   26.60
 -10  -3   2   11.60   30.70
 -10  -3   2   23.90   22.20
 -10  -3   2   41.70   22.50
 -10  -3   2    2.40   18.60
  10   2  -2  547.25   40.80
  10   2  -2  532.45   40.20
  10   2  -2  544.35   47.30
  10   2  -2  560.84   35.90
  10   2  -2  522.85   34.70
  10   2  -2  532.25   41.60
  10   2  -2  515.05   35.20
 -10  -2   2  546.65   37.00
 -10  -2   2  518.95   38.30
 -10  -2   2  524.25   38.90
 -10  -2   2  505.25   52.39
 -10  -2   2  551.94   37.30
 -10  -2   2  558.04   37.00
  10   1  -2   73.69   20.10
  10   1  -2   68.49   19.30
  10   1  -2  106.79   22.70
  10   1  -2   55.19   21.30
  10   1  -2   52.39   17.30
  10   1  -2   63.99   19.20
 -10  -1   2  103.79   27.80
 -10  -1   2   82.79   20.40
 -10  -1   2   63.19   21.20
 -10  -1   2  109.29   22.80
 -10  -1   2   85.59   21.20
 -10  -1   2   63.69   20.10
  10   0  -2  565.44   34.60
  10   0  -2  563.34   35.50
  10   0  -2  556.14   37.00
  10   0  -2  512.65   36.20
  10   0  -2  560.34   36.10
  10   0  -2  566.54   34.20
 -10   0   2  540.05   35.00
 -10   0   2  557.04   36.80
 -10   0   2  568.34   46.30
 -10   0   2  542.45   39.50
 -10   0   2  572.64   35.40
 -10   0   2  560.14   36.20
 -10   0   2  607.14   40.40
 -10   0   2  542.95   33.50
  10  -1  -2   88.49   19.10
  10  -1  -2   92.89   23.30
  10  -1  -2  119.49   21.20
  10  -1  -2   80.29   20.10
  10  -1  -2   64.19   23.90
  10  -1  -2   71.49   19.10
 -10   1   2   74.89   21.00
 -10   1   2   93.79   21.40
 -10   1   2   60.99   21.30
 -10   1   2   82.39   20.20
 -10   1   2  103.69   24.30
 -10   1   2   60.99   18.00
 -10   1   2   50.49   22.60
 -10   1   2   87.29   25.90
  10  -2  -2  501.95   34.30
  10  -2  -2  568.54   37.70
  10  -2  -2  532.05   36.10
  10  -2  -2  582.24   41.90
  10  -2  -2  495.95   37.10
  10  -2  -2  577.84   43.20
 -10   2   2  537.25   34.70
 -10   2   2  594.74   38.00
 -10   2   2  517.35   39.10
 -10   2   2  538.15   37.60
 -10   2   2  593.94   40.80
 -10   2   2  505.25   41.30
  10  -3  -2   18.00   27.10
  10  -3  -2   14.90   15.40
  10  -3  -2   15.30   30.70
  10  -3  -2   32.20   21.80
  10  -3  -2   30.70   20.00
  10  -3  -2   20.00   31.20
  10  -3  -2   31.10   20.70
 -10   3   2    4.20   22.90
 -10   3   2   18.00   23.20
 -10   3   2    9.40   21.10
 -10   3   2   29.30   29.90
  10  -4  -2  120.89   32.10
  10  -4  -2   57.09   21.40
  10  -4  -2   33.80   22.40
  10  -4  -2   86.69   12.30
  10  -4  -2   60.19   26.70
  10  -4  -2   49.80   25.10
  10  -4  -2   62.89   26.60
 -10   4   2   99.29   36.80
 -10   4   2   34.30   24.30
 -10   4   2   56.99   26.80
 -10   4   2   89.09   32.40
 -10   4   2   50.49   25.10
 -10   4   2   57.19   25.20
  10  -5  -2   55.39   23.50
  10  -5  -2   88.69   32.50
  10  -5  -2  114.49   34.60
  10  -5  -2   95.09   30.10
  10  -5  -2   60.09   25.90
 -10   5   2  114.69   28.10
 -10   5   2  147.99   44.10
 -10   5   2   66.39   30.30
 -10   5   2   30.20   28.20
 -10   5   2   87.19   28.10
  11   5  -2  -17.00   33.70
  11   5  -2    0.60   45.20
  11   5  -2  -31.00   32.10
  11   5  -2  -11.30   25.00
  11   5  -2   24.40   33.40
  11   5  -2  -23.90   23.20
 -11  -5   2   -1.90   26.20
 -11  -5   2   36.20   27.30
 -11  -5   2   30.00   23.20
 -11  -5   2   61.59   41.70
 -11  -5   2   34.00   27.60
 -11  -5   2   29.00   30.10
  11   4  -2    2.50   23.10
  11   4  -2   32.60   31.00
  11   4  -2   27.20   33.90
  11   4  -2   13.30   41.60
  11   4  -2   35.30   18.90
  11   4  -2    3.20   28.70
  11   4  -2  -21.40   22.10
 -11  -4   2   40.80   25.90
 -11  -4   2   36.10   20.90
 -11  -4   2    3.20   25.00
 -11  -4   2   33.80   34.50
 -11  -4   2   14.00   26.80
 -11  -4   2    7.60   24.60
  11   3  -2 1005.70   46.20
  11   3  -2 1103.59   48.90
  11   3  -2  936.81   54.29
  11   3  -2 1060.29   56.09
  11   3  -2  815.12   57.29
  11   3  -2 1075.89   49.20
  11   3  -2 1045.20   64.49
  11   3  -2 1063.99   58.79
 -11  -3   2 1028.40   51.89
 -11  -3   2 1008.40   70.19
 -11  -3   2 1107.29   52.99
 -11  -3   2  987.80   52.69
 -11  -3   2 1021.40   49.80
 -11  -3   2 1005.60   44.30
 -11  -3   2 1063.39   47.60
  11   2  -2  664.33   45.70
  11   2  -2  599.04   43.10
  11   2  -2  631.64   39.40
  11   2  -2  657.63   51.99
  11   2  -2  614.84   39.20
  11   2  -2  616.34   38.60
  11   2  -2  616.54   49.50
 -11  -2   2  629.74   41.60
 -11  -2   2  632.94   41.10
 -11  -2   2  625.34   55.89
 -11  -2   2  589.14   59.39
 -11  -2   2  588.94   43.00
 -11  -2   2  618.84   41.30
  11   1  -2  288.77   32.90
  11   1  -2  276.07   29.20
  11   1  -2  235.38   25.40
  11   1  -2  232.78   32.50
  11   1  -2  218.38   28.40
  11   1  -2  217.78   27.70
 -11  -1   2  205.98   30.80
 -11  -1   2  234.98   37.10
 -11  -1   2  205.78   26.60
 -11  -1   2  202.58   25.30
 -11  -1   2  193.58   29.10
 -11  -1   2  218.78   35.60
  11   0  -2   44.70   22.40
  11   0  -2   30.70   19.90
  11   0  -2   47.90   23.80
  11   0  -2   50.89   18.90
  11   0  -2   40.40   22.90
  11   0  -2   95.09   21.10
 -11   0   2   51.59   21.90
 -11   0   2   38.90   24.90
 -11   0   2   53.59   22.50
 -11   0   2   36.20   22.80
 -11   0   2   52.89   20.90
 -11   0   2   32.30   25.70
 -11   0   2   44.70   19.50
 -11   0   2   61.49   20.60
  11  -1  -2  252.27   27.90
  11  -1  -2  227.88   32.60
  11  -1  -2  291.27   33.40
  11  -1  -2  238.58   32.80
  11  -1  -2  234.48   33.40
  11  -1  -2  217.78   35.90
 -11   1   2  203.88   25.90
 -11   1   2  214.18   26.40
 -11   1   2  288.27   44.00
 -11   1   2  227.78   34.20
 -11   1   2  260.67   33.90
 -11   1   2  222.48   33.60
 -11   1   2  268.37   33.00
 -11   1   2  269.77   28.90
  11  -2  -2  664.53   42.60
  11  -2  -2  633.74   41.10
  11  -2  -2  720.13   47.70
  11  -2  -2  681.63   42.40
  11  -2  -2  652.83   47.00
 -11   2   2  646.04   38.70
 -11   2   2  664.33   43.00
 -11   2   2  655.53   44.40
 -11   2   2  655.63   45.80
 -11   2   2  606.74   46.30
  11  -3  -2 1095.69   48.20
  11  -3  -2  990.50   49.10
  11  -3  -2 1078.89   50.29
  11  -3  -2 1067.79   41.00
  11  -3  -2 1003.10   51.99
  11  -3  -2 1027.70   56.69
 -11   3   2  944.51   47.50
 -11   3   2 1026.70   48.40
 -11   3   2 1113.29   56.79
 -11   3   2 1069.89   53.79
 -11   3   2  923.81   49.40
  11  -4  -2  -18.50   28.60
  11  -4  -2    4.80   26.10
  11  -4  -2    4.50   22.80
  11  -4  -2   24.30   23.20
  11  -4  -2   12.30   26.00
 -11   4   2   22.70   28.50
 -11   4   2   21.50   35.60
 -11   4   2  -16.60   23.60
 -11   4   2  -10.20   26.50
 -11   4   2   15.10   27.10
 -11   4   2   -2.60   25.20
  11  -5  -2    6.00   25.50
  11  -5  -2   -1.60   32.30
  11  -5  -2   23.90   39.30
  11  -5  -2   19.80   27.60
  11  -5  -2   32.50   24.10
  11  -5  -2  -17.50   25.60
 -11   5   2  -39.30   26.70
 -11   5   2   41.60   35.90
 -11   5   2   23.70   41.50
 -11   5   2   13.50   26.80
  12   4  -2   74.89   24.60
  12   4  -2   60.39   29.50
  12   4  -2  165.18   34.50
  12   4  -2   42.50   29.80
  12   4  -2   59.09   25.70
  12   4  -2  134.79   33.50
  12   4  -2  134.59   34.60
 -12  -4   2   59.49   34.80
 -12  -4   2  140.69   24.10
 -12  -4   2   91.69   28.10
 -12  -4   2   97.49   28.30
 -12  -4   2   96.39   26.40
 -12  -4   2  118.39   28.40
  12   3  -2  361.66   56.59
  12   3  -2  294.47   51.09
  12   3  -2  344.77   41.80
  12   3  -2  323.97   40.70
  12   3  -2  309.67   34.60
  12   3  -2  320.27   33.60
  12   3  -2  327.77   47.30
  12   3  -2  300.07   36.50
 -12  -3   2  304.97   36.90
 -12  -3   2  314.77   32.30
 -12  -3   2  306.07   61.69
 -12  -3   2  288.77   39.10
 -12  -3   2  317.57   40.40
 -12  -3   2  367.06   42.30
  12   2  -2  610.34   40.70
  12   2  -2  468.55   51.29
  12   2  -2  699.43   64.19
  12   2  -2  561.74   57.79
  12   2  -2  613.94   37.40
  12   2  -2  554.44   40.40
  12   2  -2  584.24   48.20
 -12  -2   2  508.05   60.99
 -12  -2   2  535.55   59.99
 -12  -2   2  549.95   44.50
 -12  -2   2  547.45   42.70
 -12  -2   2  673.33   44.50
 -12  -2   2  600.74   43.30
  12   1  -2  276.37   36.00
  12   1  -2  208.58   35.60
  12   1  -2  221.48   30.30
  12   1  -2  232.88   34.40
  12   1  -2  306.27   28.90
 -12  -1   2  225.58   38.30
 -12  -1   2  240.88   29.20
 -12  -1   2  252.37   39.40
 -12  -1   2  257.17   29.00
 -12  -1   2  251.17   33.70
  12   0  -2  991.60   49.50
  12   0  -2  941.01   47.30
  12   0  -2  989.20   48.80
  12   0  -2 1016.00   50.69
  12   0  -2  998.90   47.90
 -12   0   2 1000.80   46.80
 -12   0   2  986.80   49.99
 -12   0   2  992.10   48.40
 -12   0   2  895.61   52.59
 -12   0   2 1006.60   57.19
 -12   0   2  989.30   65.59
 -12   0   2  967.70   49.80
  12  -1  -2  223.38   30.50
  12  -1  -2  237.38   31.30
  12  -1  -2  231.28   32.70
  12  -1  -2  258.37   37.30
  12  -1  -2  315.47   31.60
  12  -1  -2  296.77   40.20
 -12   1   2  218.58   28.30
 -12   1   2  234.28   40.10
 -12   1   2  282.37   36.10
 -12   1   2  253.67   30.50
 -12   1   2  267.47   36.00
 -12   1   2  277.97   38.00
 -12   1   2  301.87   43.60
  12  -2  -2  658.23   56.09
  12  -2  -2  655.33   48.30
  12  -2  -2  631.54   40.30
  12  -2  -2  585.34   47.80
  12  -2  -2  651.03   44.00
  12  -2  -2  583.54   42.10
 -12   2   2  586.54   48.40
 -12   2   2  682.03   47.90
 -12   2   2  636.44   40.90
 -12   2   2  658.93   51.29
 -12   2   2  661.23   46.60
 -12   2   2  591.64   41.90
  12  -3  -2  309.67   44.70
  12  -3  -2  310.17   39.10
  12  -3  -2  286.87   41.00
  12  -3  -2  316.37   28.70
  12  -3  -2  363.46   35.70
  12  -3  -2  269.17   40.10
 -12   3   2  240.68   35.20
 -12   3   2  299.87   44.80
 -12   3   2  289.27   43.10
 -12   3   2  323.57   41.00
 -12   3   2  309.07   45.50
  12  -4  -2   86.09   29.10
  12  -4  -2  109.59   28.60
  12  -4  -2   65.89   26.10
  12  -4  -2  112.49   25.10
  12  -4  -2   96.79   35.90
 -12   4   2  118.29   37.20
 -12   4   2  137.19   30.10
 -12   4   2  130.69   32.50
 -12   4   2   90.59   51.49
 -12   4   2   44.90   26.10
 -12   4   2   52.69   26.90
  13   4  -2   97.89   35.40
  13   4  -2   11.10   32.40
  13   4  -2   94.39   37.80
  13   4  -2  115.49   24.80
  13   4  -2   21.30   25.90
  13   4  -2   60.99   31.80
  13   4  -2   23.60   26.50
  13   4  -2  136.69   46.80
 -13  -4   2   34.10   41.00
 -13  -4   2   59.49   22.80
 -13  -4   2   69.89   29.50
 -13  -4   2   57.49   30.30
 -13  -4   2   41.90   32.70
  13   3  -2  111.49   33.20
  13   3  -2  107.39   33.70
  13   3  -2   35.00   27.10
  13   3  -2   87.89   25.30
  13   3  -2   31.10   25.60
  13   3  -2   60.89   28.50
  13   3  -2   33.10   41.60
  13   3  -2   26.80   30.10
 -13  -3   2   18.20   28.50
 -13  -3   2   69.19   29.70
 -13  -3   2   28.50   35.30
 -13  -3   2   52.79   28.60
 -13  -3   2   36.40   27.00
 -13  -3   2   37.20   21.10
  13   2  -2   41.30   29.10
  13   2  -2   52.39   25.80
  13   2  -2  121.19   32.10
  13   2  -2   34.30   24.80
  13   2  -2   37.40   23.50
 -13  -2   2   57.79   27.80
 -13  -2   2   37.00   26.10
 -13  -2   2   48.30   27.80
 -13  -2   2   60.79   26.80
 -13  -2   2   30.90   36.60
 -13  -2   2   27.10   24.90
  13   1  -2  252.47   37.10
  13   1  -2  298.87   33.80
  13   1  -2  314.07   43.10
  13   1  -2  308.77   33.40
  13   1  -2  318.97   38.40
  13   1  -2  265.57   35.00
 -13  -1   2  285.27   36.00
 -13  -1   2  298.77   33.50
 -13  -1   2  324.97   42.10
 -13  -1   2  260.47   34.60
 -13  -1   2  276.37   40.00
 -13  -1   2  306.17   39.70
  13   0  -2 1006.40   57.19
  13   0  -2 1170.18   76.39
  13   0  -2 1318.97   59.19
  13   0  -2 1276.87   56.79
  13   0  -2 1320.17   55.69
 -13   0   2 1342.67   63.69
 -13   0   2 1247.28   54.49
 -13   0   2 1156.88   71.19
 -13   0   2 1185.98   55.89
 -13   0   2 1322.37   70.89
 -13   0   2 1212.58   54.49
 -13   0   2 1261.27   61.09
  13  -1  -2  279.07   34.00
  13  -1  -2  240.08   30.80
  13  -1  -2  237.08   39.40
  13  -1  -2  282.87   38.70
  13  -1  -2  291.07   40.10
  13  -1  -2  297.87   43.10
 -13   1   2  365.26   47.40
 -13   1   2  342.17   41.00
 -13   1   2  288.57   38.00
 -13   1   2  314.47   39.70
 -13   1   2  324.17   35.10
 -13   1   2  265.87   43.70
 -13   1   2  265.97   35.90
  13  -2  -2   86.29   45.10
  13  -2  -2   38.80   23.40
  13  -2  -2   42.70   25.20
  13  -2  -2   98.39   40.10
  13  -2  -2   44.70   26.50
  13  -2  -2   34.60   22.70
 -13   2   2   52.89   33.80
 -13   2   2   72.29   30.80
 -13   2   2   57.69   28.70
 -13   2   2   66.39   28.80
 -13   2   2   68.99   44.40
 -13   2   2   12.50   24.70
  13  -3  -2   67.09   24.40
  13  -3  -2   62.99   29.30
  13  -3  -2   22.90   25.00
  13  -3  -2   50.59   18.60
  13  -3  -2   27.10   25.90
  13  -3  -2   17.10   27.90
 -13   3   2   58.19   29.50
 -13   3   2   30.20   28.10
 -13   3   2   60.29   26.10
 -13   3   2    6.30   26.30
 -13   3   2   55.99   36.90
  13  -4  -2   45.00   25.80
  13  -4  -2   41.90   28.90
  13  -4  -2   50.89   28.50
  13  -4  -2   64.59   31.00
  13  -4  -2   -4.10   34.00
 -13   4   2   61.49   49.30
 -13   4   2   28.00   30.00
 -13   4   2  133.09   36.00
 -13   4   2   38.90   25.40
 -13   4   2   -3.70   36.60
 -13   4   2   77.09   29.20
  14   3  -2   24.30   31.50
  14   3  -2   21.00   24.20
  14   3  -2  -23.10   22.90
  14   3  -2   10.70   27.90
  14   3  -2  -17.50   23.60
  14   3  -2    5.30   28.20
  14   3  -2   70.99   34.40
  14   3  -2   96.49   34.60
 -14  -3   2   30.40   22.50
 -14  -3   2   15.80   27.50
 -14  -3   2    9.40   39.80
 -14  -3   2   44.20   29.70
 -14  -3   2   21.30   28.10
 -14  -3   2    5.10   28.20
  14   2  -2   -9.50   22.50
  14   2  -2   57.99   30.20
  14   2  -2   92.69   31.60
  14   2  -2   15.60   23.80
  14   2  -2    2.90   25.10
  14   2  -2   36.40   27.20
 -14  -2   2   33.60   29.30
 -14  -2   2   58.79   39.30
 -14  -2   2   59.19   30.10
 -14  -2   2   29.90   28.00
 -14  -2   2   38.70   29.70
 -14  -2   2   60.39   28.90
  14   1  -2   56.39   27.10
  14   1  -2   17.90   24.70
  14   1  -2   39.90   27.30
  14   1  -2   47.50   28.10
  14   1  -2   45.00   23.20
  14   1  -2   47.90   25.50
 -14  -1   2   36.20   34.00
 -14  -1   2   42.40   27.90
 -14  -1   2   27.50   24.70
 -14  -1   2   74.99   29.60
 -14  -1   2   36.30   25.90
 -14  -1   2   34.00   24.10
 -14  -1   2   44.50   28.90
  14   0  -2  191.88   27.30
  14   0  -2  250.37   46.00
  14   0  -2  291.77   43.00
  14   0  -2  242.28   41.10
  14   0  -2  247.48   31.00
  14   0  -2  184.78   29.50
 -14   0   2  284.07   41.10
 -14   0   2  221.68   36.40
 -14   0   2  263.77   34.10
 -14   0   2  290.27   61.99
 -14   0   2  251.67   31.60
 -14   0   2  202.48   29.80
  14  -1  -2   45.50   26.60
  14  -1  -2   55.59   28.70
  14  -1  -2   46.30   23.10
  14  -1  -2   61.89   25.10
  14  -1  -2   62.79   32.50
 -14   1   2   71.89   28.80
 -14   1   2   37.90   29.40
 -14   1   2   69.79   39.90
 -14   1   2   59.99   28.00
 -14   1   2   27.20   25.60
 -14   1   2   80.99   29.20
 -14   1   2   54.69   28.10
 -14   1   2   51.39   31.40
  14  -2  -2   80.19   28.00
  14  -2  -2   36.30   28.40
  14  -2  -2   53.59   28.70
  14  -2  -2    6.40   23.30
  14  -2  -2   -4.90   23.10
  14  -2  -2   30.90   27.10
 -14   2   2   38.10   25.90
 -14   2   2   98.49   32.50
 -14   2   2   21.80   26.00
 -14   2   2   17.00   29.90
 -14   2   2    0.80   26.50
 -14   2   2   19.40   31.50
  14  -3  -2   44.70   28.70
  14  -3  -2   -8.80   24.30
  14  -3  -2  -19.10   24.80
  14  -3  -2   10.80   30.80
  14  -3  -2    8.90   26.30
  14  -3  -2   -5.60   18.20
 -14   3   2   15.80   28.80
 -14   3   2    0.10   28.30
 -14   3   2   83.29   39.70
 -14   3   2  -11.60   30.50
 -14   3   2   30.40   30.20
 -14   3   2   -0.90   27.90
  15   3  -2  128.79   36.40
  15   3  -2   22.50   28.70
  15   3  -2   71.69   35.20
  15   3  -2  178.98   39.60
  15   3  -2   92.29   30.40
  15   3  -2  144.49   41.10
  15   3  -2  149.09   37.40
  15   3  -2  112.29   29.40
 -15  -3   2   33.90   29.20
 -15  -3   2   78.69   31.80
 -15  -3   2   74.49   24.90
 -15  -3   2   17.60   40.90
 -15  -3   2   78.49   32.60
 -15  -3   2   87.89   32.50
  15   2  -2  -10.90   24.20
  15   2  -2   82.89   34.80
  15   2  -2   32.50   26.40
  15   2  -2   45.30   26.20
  15   2  -2   65.19   33.50
  15   2  -2   81.79   33.00
 -15  -2   2   45.30   27.40
 -15  -2   2  107.59   30.30
 -15  -2   2   70.99   31.10
 -15  -2   2   85.29   44.00
 -15  -2   2   48.70   30.50
 -15  -2   2   92.59   31.40
  15   1  -2  176.68   34.60
  15   1  -2   85.89   27.70
  15   1  -2  155.88   35.50
  15   1  -2  119.79   31.20
  15   1  -2   98.09   25.90
 -15  -1   2  192.58   37.40
 -15  -1   2  130.29   31.20
 -15  -1   2  106.49   31.90
 -15  -1   2  108.59   39.80
 -15  -1   2  133.09   32.00
 -15  -1   2  122.79   28.00
 -15  -1   2   79.99   27.70
  15   0  -2  175.48   34.00
  15   0  -2  101.59   26.70
  15   0  -2  147.29   30.40
  15   0  -2  115.19   29.60
  15   0  -2  134.79   31.60
  15   0  -2  171.08   36.80
 -15   0   2  171.98   33.60
 -15   0   2  176.88   39.90
 -15   0   2  131.49   29.30
 -15   0   2   50.09   32.80
 -15   0   2  200.78   37.10
 -15   0   2   89.69   28.80
 -15   0   2  103.39   29.10
 -15   0   2  118.89   32.30
  15  -1  -2  127.29   31.70
  15  -1  -2   56.49   25.70
  15  -1  -2   78.19   28.30
  15  -1  -2   92.49   29.40
  15  -1  -2  110.19   28.90
  15  -1  -2   81.39   27.90
 -15   1   2  108.89   31.00
 -15   1   2   84.69   29.10
 -15   1   2   73.09   49.70
 -15   1   2  148.69   32.80
 -15   1   2  101.99   31.20
 -15   1   2  195.08   39.50
 -15   1   2  127.29   36.30
 -15   1   2  124.29   38.50
  15  -2  -2  105.59   32.40
  15  -2  -2   71.89   29.30
  15  -2  -2   23.80   27.90
  15  -2  -2   40.40   33.60
  15  -2  -2   88.89   30.30
  15  -2  -2    0.20   24.20
 -15   2   2   24.20   27.70
 -15   2   2   40.40   34.20
 -15   2   2   29.70   36.30
 -15   2   2   47.70   32.00
 -15   2   2   62.79   31.10
 -15   2   2   47.60   27.90
  15  -3  -2   27.10   28.10
  15  -3  -2   84.09   36.60
  15  -3  -2   80.59   21.10
  15  -3  -2   33.70   29.20
  15  -3  -2   70.09   29.70
  15  -3  -2  109.19   32.10
 -15   3   2   47.70   29.50
 -15   3   2  113.19   33.60
 -15   3   2   -1.20   27.30
 -15   3   2  122.09   36.00
 -15   3   2   36.70   29.80
  16   2  -2   99.69   39.10
  16   2  -2   66.29   29.40
  16   2  -2  186.78   39.40
  16   2  -2   -5.90   29.40
  16   2  -2   59.99   28.10
  16   2  -2   17.10   29.10
 -16  -2   2   96.69   36.90
 -16  -2   2   39.70   26.90
 -16  -2   2   72.69   32.20
 -16  -2   2   34.20   40.90
 -16  -2   2   16.70   40.50
 -16  -2   2   -3.90   38.60
  16   1  -2   14.40   32.70
  16   1  -2  -36.90   26.00
  16   1  -2  -53.99   23.60
  16   1  -2   -3.20   30.20
  16   1  -2   45.90   33.20
  16   1  -2   94.09   35.50
  16   1  -2   -7.80   26.10
 -16  -1   2   19.10   31.40
 -16  -1   2   61.29   32.80
 -16  -1   2  -39.70   39.50
 -16  -1   2   25.30   31.00
 -16  -1   2  -15.20   29.50
 -16  -1   2   11.20   30.60
  16   0  -2   -5.20   23.80
  16   0  -2   43.40   27.70
  16   0  -2   18.90   32.50
  16   0  -2   39.60   35.30
  16   0  -2  -21.20   27.10
  16   0  -2   83.19   33.60
 -16   0   2   75.39   36.30
 -16   0   2    4.50   42.90
 -16   0   2   79.49   36.50
 -16   0   2    7.80   30.80
 -16   0   2   19.20   31.40
 -16   0   2   27.30   27.90
 -16   0   2   43.00   29.60
 -16   0   2   12.30   29.40
  16  -1  -2  -50.89   26.10
  16  -1  -2   17.80   27.00
  16  -1  -2  -11.70   41.40
  16  -1  -2   27.50   28.30
  16  -1  -2  -28.20   27.80
  16  -1  -2  -13.60   24.00
 -16   1   2   -0.90   27.50
 -16   1   2   19.20   37.90
 -16   1   2  -10.70   28.90
 -16   1   2  -40.70   64.19
 -16   1   2   18.80   28.10
 -16   1   2  -23.20   30.50
 -16   1   2  -22.40   27.10
  16  -2  -2  104.39   43.80
  16  -2  -2   72.69   37.60
  16  -2  -2  -26.90   29.00
  16  -2  -2   69.99   27.70
  16  -2  -2    7.60   28.10
  16  -2  -2   81.99   37.90
  16  -2  -2  126.29   30.50
 -16   2   2   35.80   37.60
 -16   2   2  -14.80   48.20
 -16   2   2   51.69   32.50
 -16   2   2   85.59   33.40
 -16   2   2    6.20   27.90
 -16   2   2   33.10   40.00
  17   0  -2  276.27   41.30
  17   0  -2  384.26   53.69
  17   0  -2  284.47   43.70
  17   0  -2  362.06   52.59
 -17   0   2  330.77   48.30
 -17   0   2  196.68   37.10
 -17   0   2  317.87   42.40
 -15   1  -3  161.98   39.40
 -15   1  -3  226.48   35.20
 -15   1  -3  130.59   36.20
 -15   1  -3  155.98   33.30
 -15   1  -3  172.58   49.00
 -15   1  -3   93.49   31.10
 -15   1  -3  167.68   62.39
  15  -1   3  276.87   38.90
  15  -1   3  207.68   34.10
  15  -1   3  101.29   38.40
 -15   0  -3  -18.10   38.80
 -15   0  -3   11.70   29.30
 -15   0  -3    1.10   31.90
 -15   0  -3  -18.20   30.20
 -15   0  -3   51.39   32.40
 -15   0  -3   49.00   34.40
  15   0   3   41.30   36.40
  15   0   3  -24.30   26.40
  15   0   3  -26.70   26.10
  15   0   3  110.39   35.50
  15   0   3   58.79   21.60
  15   0   3   91.79   34.00
 -15  -1  -3  153.78   32.20
 -15  -1  -3  156.18   34.30
 -15  -1  -3   68.19   41.80
 -15  -1  -3  190.18   36.80
  15   1   3  266.37   45.20
  15   1   3   61.89   31.70
  15   1   3  175.08   63.09
  15   1   3  146.09   25.50
 -14   2  -3   -5.50   26.90
 -14   2  -3   13.50   30.90
 -14   2  -3   41.70   33.30
 -14   2  -3  -36.10   36.70
 -14   2  -3   44.70   29.30
 -14   2  -3  -22.70   30.70
 -14   2  -3   -4.30   36.70
  14  -2   3   32.80   28.20
  14  -2   3   21.00   29.50
  14  -2   3  -25.00   24.20
  14  -2   3   34.20   38.00
  14  -2   3   28.90   22.80
 -14   1  -3   41.30   28.40
 -14   1  -3   17.90   25.30
 -14   1  -3   32.20   32.30
 -14   1  -3   38.30   31.80
 -14   1  -3   27.20   31.10
 -14   1  -3   39.20   27.30
 -14   1  -3   51.19   39.30
  14  -1   3   58.99   29.70
  14  -1   3   90.19   21.80
  14  -1   3    8.10   24.80
  14  -1   3   36.00   32.70
  14  -1   3   51.49   27.40
  14  -1   3   -1.60   24.20
 -14   0  -3   29.70   35.00
 -14   0  -3    5.60   32.00
 -14   0  -3   99.59   31.70
 -14   0  -3   42.10   33.10
 -14   0  -3   44.90   26.20
 -14   0  -3   31.00   28.40
  14   0   3   45.00   28.90
  14   0   3   10.80   25.40
  14   0   3   58.69   29.40
  14   0   3  110.29   31.80
  14   0   3   99.19   32.30
  14   0   3   -8.50   24.60
  14   0   3   85.99   22.00
 -14  -1  -3   54.39   30.80
 -14  -1  -3   18.90   29.50
 -14  -1  -3   17.70   31.50
 -14  -1  -3   -5.80   38.40
 -14  -1  -3   49.50   30.30
 -14  -1  -3   56.89   26.80
  14   1   3   26.50   23.70
  14   1   3   32.10   22.10
  14   1   3   91.29   30.90
  14   1   3   32.00   32.50
  14   1   3   98.19   34.90
  14   1   3    7.80   25.30
  14   1   3   37.40   29.00
 -14  -2  -3  -16.80   29.80
 -14  -2  -3  -32.30   54.29
 -14  -2  -3   11.90   31.10
 -14  -2  -3   33.40   32.70
 -14  -2  -3    8.70   31.00
 -14  -2  -3   20.70   27.50
  14   2   3   98.09   36.80
  14   2   3  -21.60   25.60
  14   2   3   44.50   31.10
  14   2   3  -59.19   25.70
  14   2   3   99.89   39.40
  14   2   3   13.70   34.60
 -13   3  -3  149.29   52.69
 -13   3  -3  116.69   75.49
 -13   3  -3   63.79   29.10
 -13   3  -3   94.89   31.60
 -13   3  -3   92.29   30.10
 -13   3  -3   87.89   28.20
  13  -3   3  129.89   29.60
  13  -3   3  105.29   30.50
  13  -3   3   45.10   36.00
  13  -3   3   49.99   26.80
 -13   2  -3   89.59   26.70
 -13   2  -3  145.19   31.70
 -13   2  -3  126.69   29.00
 -13   2  -3   46.90   32.20
 -13   2  -3   90.59   28.60
 -13   2  -3  153.38   38.30
 -13   2  -3  100.99   51.79
 -13   2  -3  141.79   31.00
  13  -2   3  172.78   30.50
  13  -2   3  120.59   27.30
  13  -2   3  125.39   23.60
  13  -2   3  157.08   30.90
  13  -2   3   63.59   28.50
 -13   1  -3   39.70   26.90
 -13   1  -3   -1.60   32.90
 -13   1  -3   34.00   26.70
 -13   1  -3   39.60   49.30
 -13   1  -3   66.39   29.80
 -13   1  -3   51.19   27.70
 -13   1  -3   80.29   28.20
 -13   1  -3   47.70   30.80
  13  -1   3   47.70   30.90
  13  -1   3   20.80   24.10
  13  -1   3   65.89   28.30
  13  -1   3   46.70   24.10
  13  -1   3   53.69   25.70
  13  -1   3   20.80   25.00
  13  -1   3  105.69   22.40
 -13   0  -3    6.20   34.00
 -13   0  -3   12.20   28.40
 -13   0  -3    9.40   26.90
 -13   0  -3  -35.80   31.30
 -13   0  -3  -29.00   29.00
 -13   0  -3  -21.70   31.90
  13   0   3   -1.50   23.40
  13   0   3   23.70   19.90
  13   0   3   38.10   30.00
  13   0   3   -3.00   28.70
  13   0   3  -21.00   23.80
  13   0   3  -12.80   26.30
 -13  -1  -3   74.59   28.90
 -13  -1  -3   25.50   33.60
 -13  -1  -3   41.20   32.60
 -13  -1  -3   48.30   30.20
 -13  -1  -3   14.10   27.40
 -13  -1  -3   64.49   30.70
  13   1   3   35.30   21.20
  13   1   3   18.00   24.00
  13   1   3   76.39   32.80
  13   1   3   52.29   32.30
  13   1   3   72.99   29.80
  13   1   3   42.60   30.40
  13   1   3   43.50   25.60
 -13  -2  -3   95.49   40.80
 -13  -2  -3  147.49   32.60
 -13  -2  -3  121.49   31.30
 -13  -2  -3  115.89   31.10
 -13  -2  -3  153.98   36.30
  13   2   3  116.59   25.30
  13   2   3   89.59   28.90
  13   2   3  164.38   38.70
  13   2   3  135.99   33.90
  13   2   3   47.20   22.90
  13   2   3   72.39   27.80
  13   2   3   84.89   30.70
 -13  -3  -3  133.59   34.30
 -13  -3  -3  124.49   33.80
 -13  -3  -3  115.19   33.40
 -13  -3  -3  105.39   33.50
 -13  -3  -3   57.79   29.00
 -13  -3  -3   -6.50   60.39
  13   3   3  110.59   29.20
  13   3   3   70.69   34.10
  13   3   3  126.29   37.10
  13   3   3   79.69   28.70
  13   3   3  193.98   40.00
  13   3   3  207.28   36.30
  13   3   3   54.99   28.10
 -12   4  -3  348.67   47.10
 -12   4  -3  235.38   36.70
 -12   4  -3  276.37   50.19
 -12   4  -3  257.17   33.00
 -12   4  -3  337.27   43.20
 -12   4  -3  361.26   54.99
 -12   4  -3  231.98   32.90
  12  -4   3  251.47   32.40
  12  -4   3  406.56   40.30
  12  -4   3  318.27   42.40
  12  -4   3  363.46   56.59
 -12   3  -3    5.20   43.80
 -12   3  -3    0.00   23.50
 -12   3  -3   24.60   28.60
 -12   3  -3   12.00   31.40
 -12   3  -3   30.90   34.80
 -12   3  -3   -6.50   24.10
 -12   3  -3   35.60   27.00
  12  -3   3  -28.20   23.10
  12  -3   3   15.00   35.00
  12  -3   3  -16.70   22.70
  12  -3   3   -0.10   18.40
  12  -3   3  -12.90   26.80
  12  -3   3   -1.80   24.30
 -12   2  -3   81.79   28.50
 -12   2  -3   47.70   29.30
 -12   2  -3  121.99   27.20
 -12   2  -3   68.69   30.90
 -12   2  -3   95.99   28.30
 -12   2  -3   87.79   27.70
  12  -2   3   56.09   24.10
  12  -2   3  107.69   27.20
  12  -2   3   78.59   20.90
  12  -2   3  107.99   28.00
  12  -2   3   93.39   25.70
 -12   1  -3  476.25   42.50
 -12   1  -3  404.26   50.49
 -12   1  -3  481.25   37.10
 -12   1  -3  425.26   56.29
 -12   1  -3  434.46   40.30
 -12   1  -3  479.35   44.10
 -12   1  -3  404.46   49.20
 -12   1  -3  424.66   40.40
  12  -1   3  382.66   38.50
  12  -1   3  497.25   44.10
  12  -1   3  484.45   33.60
  12  -1   3  480.15   39.10
  12  -1   3  439.36   46.10
  12  -1   3  435.56   38.90
  12  -1   3  455.95   39.50
 -12   0  -3  433.16   49.30
 -12   0  -3  320.87   57.09
 -12   0  -3  464.05   43.10
 -12   0  -3  356.06   39.10
 -12   0  -3  381.46   43.40
 -12   0  -3  389.16   36.50
  12   0   3  425.46   40.20
  12   0   3  402.56   38.70
  12   0   3  392.96   51.49
  12   0   3  396.56   39.60
  12   0   3  455.65   31.60
  12   0   3  430.16   45.10
  12   0   3  416.36   44.70
 -12  -1  -3  354.06   60.29
 -12  -1  -3  464.05   40.70
 -12  -1  -3  511.45   43.20
 -12  -1  -3  483.15   38.20
 -12  -1  -3  493.85   49.00
  12   1   3  434.76   46.10
  12   1   3  415.36   39.10
  12   1   3  365.36   37.10
  12   1   3  469.55   33.00
  12   1   3  356.36   45.70
  12   1   3  509.85   48.00
  12   1   3  455.25   64.69
 -12  -2  -3   79.19   29.20
 -12  -2  -3   82.69   34.50
 -12  -2  -3   59.69   30.70
 -12  -2  -3   65.19   28.90
 -12  -2  -3   74.09   51.39
 -12  -2  -3   58.79   27.60
  12   2   3  109.69   25.20
  12   2   3   95.09   29.00
  12   2   3  107.49   34.60
  12   2   3   76.39   30.00
  12   2   3  110.59   36.10
  12   2   3  103.69   26.10
  12   2   3   79.09   28.30
 -12  -3  -3    0.20   38.10
 -12  -3  -3   38.40   27.70
 -12  -3  -3   18.10   26.50
 -12  -3  -3    9.30   28.20
 -12  -3  -3   -2.90   26.10
 -12  -3  -3  -26.30   28.10
  12   3   3  -30.30   24.80
  12   3   3  -45.90   23.10
  12   3   3   20.60   24.50
  12   3   3   54.69   34.90
  12   3   3   -7.00   25.70
  12   3   3   57.89   31.30
  12   3   3   22.10   28.30
 -12  -4  -3  473.35   51.69
 -12  -4  -3  273.07   39.10
 -12  -4  -3  391.26   73.29
 -12  -4  -3  463.55   65.69
 -12  -4  -3  409.66   58.69
 -12  -4  -3  414.76   52.99
 -12  -4  -3  335.07   42.50
  12   4   3  285.77   36.20
  12   4   3  309.07   45.20
  12   4   3  199.98   32.60
  12   4   3  367.66   56.69
 -11   4  -3  183.68   29.00
 -11   4  -3  102.49   52.59
 -11   4  -3  222.48   39.50
 -11   4  -3  124.09   32.90
 -11   4  -3  245.58   64.69
 -11   4  -3  169.28   29.70
  11  -4   3  111.29   32.00
  11  -4   3  129.19   26.30
  11  -4   3  139.09   27.40
 -11   3  -3   57.69   25.40
 -11   3  -3   63.79   26.40
 -11   3  -3   61.39   27.20
 -11   3  -3   15.10   28.10
 -11   3  -3   56.29   33.00
 -11   3  -3   77.79   25.80
  11  -3   3   93.99   24.90
  11  -3   3   89.79   23.70
  11  -3   3   37.00   22.70
  11  -3   3   75.69   24.10
  11  -3   3   32.50   32.00
 -11   2  -3  396.36   47.70
 -11   2  -3  476.15   37.50
 -11   2  -3  412.26   38.60
 -11   2  -3  469.05   49.90
 -11   2  -3  382.66   43.40
 -11   2  -3  409.06   35.40
  11  -2   3  395.66   37.20
  11  -2   3  440.86   39.60
  11  -2   3  405.46   32.10
  11  -2   3  452.05   40.30
  11  -2   3  446.66   45.90
  11  -2   3  472.95   37.50
 -11   1  -3   11.10   21.40
 -11   1  -3   -5.10   19.90
 -11   1  -3   -3.10   23.20
 -11   1  -3   11.90   30.00
 -11   1  -3   -0.20   25.40
 -11   1  -3  -11.20   21.90
 -11   1  -3    1.60   28.30
 -11   1  -3   21.80   22.20
  11  -1   3   -9.80   22.80
  11  -1   3   -3.60   22.60
  11  -1   3  -14.80   20.20
  11  -1   3    9.50   18.90
  11  -1   3   15.90   27.60
  11  -1   3  -20.50   20.20
  11  -1   3  -29.90   19.80
 -11   0  -3  927.51   61.59
 -11   0  -3  875.51   49.40
 -11   0  -3  915.71   49.00
 -11   0  -3  791.82   54.49
 -11   0  -3  772.02   61.29
 -11   0  -3  886.51   46.70
  11   0   3  941.81   50.79
  11   0   3  879.11   49.30
  11   0   3  870.41   45.10
  11   0   3  907.61   52.79
  11   0   3  829.62   49.80
  11   0   3  858.41   38.30
  11   0   3  750.22   48.00
 -11  -1  -3   11.70   21.80
 -11  -1  -3  -25.70   25.90
 -11  -1  -3  -26.50   24.20
 -11  -1  -3    9.10   22.30
 -11  -1  -3   10.60   25.60
 -11  -1  -3  -32.20   29.70
  11   1   3    4.70   21.10
  11   1   3   -0.30   19.60
  11   1   3    4.60   18.50
  11   1   3   -9.50   24.10
  11   1   3   -1.60   24.90
  11   1   3  -16.50   27.10
  11   1   3   11.10   26.70
 -11  -2  -3  458.15   42.30
 -11  -2  -3  471.95   42.40
 -11  -2  -3  360.76   58.89
 -11  -2  -3  474.45   45.90
 -11  -2  -3  466.15   40.90
 -11  -2  -3  507.65   56.19
  11   2   3  439.56   39.90
  11   2   3  420.06   48.10
  11   2   3  549.54   49.99
  11   2   3  500.95   48.80
  11   2   3  486.75   45.00
  11   2   3  448.06   35.60
  11   2   3  415.76   35.90
 -11  -3  -3   10.60   24.70
 -11  -3  -3    3.00   42.40
 -11  -3  -3   76.79   28.90
 -11  -3  -3   46.70   26.80
 -11  -3  -3   87.79   31.20
  11   3   3   84.39   30.90
  11   3   3   48.20   25.90
  11   3   3  113.59   35.00
  11   3   3   44.30   28.50
  11   3   3   21.70   25.60
  11   3   3   71.49   49.90
  11   3   3    6.70   21.90
  11   3   3   93.39   35.50
 -11  -4  -3  167.58   45.30
 -11  -4  -3  223.58   37.20
 -11  -4  -3  198.38   35.70
 -11  -4  -3  113.59   38.70
 -11  -4  -3  117.19   27.10
 -11  -4  -3  178.08   35.00
  11   4   3   86.69   26.80
  11   4   3  122.89   43.30
  11   4   3  113.69   35.50
  11   4   3  185.48   36.40
 -10   5  -3   65.79   25.20
  10  -5   3   41.40   24.40
 -10   4  -3   69.99   32.10
 -10   4  -3   81.89   25.20
 -10   4  -3   96.99   29.40
 -10   4  -3   60.69   24.70
 -10   4  -3  109.39   24.80
 -10   4  -3   92.49   35.30
 -10   4  -3   78.09   25.20
  10  -4   3   96.49   23.20
  10  -4   3   86.39   23.30
  10  -4   3   66.89   24.30
  10  -4   3   78.99   29.00
  10  -4   3   65.09   24.30
 -10   3  -3  714.53   44.50
 -10   3  -3  674.33   41.40
 -10   3  -3  718.63   51.99
 -10   3  -3  627.14   53.29
 -10   3  -3  660.13   42.90
 -10   3  -3  653.13   40.60
 -10   3  -3  632.34   42.50
  10  -3   3  684.73   42.80
  10  -3   3  718.43   43.30
  10  -3   3  639.94   41.10
  10  -3   3  635.74   48.90
  10  -3   3  659.63   40.80
 -10   2  -3  410.66   41.10
 -10   2  -3  446.36   47.40
 -10   2  -3  411.66   33.50
 -10   2  -3  480.45   34.30
 -10   2  -3  431.46   47.10
 -10   2  -3  447.66   36.10
 -10   2  -3  480.65   35.90
  10  -2   3  448.66   36.10
  10  -2   3  471.55   37.20
  10  -2   3  434.26   35.30
  10  -2   3  436.96   39.60
  10  -2   3  502.15   44.50
  10  -2   3  465.35   30.20
 -10   1  -3  149.88   27.10
 -10   1  -3  113.59   21.80
 -10   1  -3  186.88   27.30
 -10   1  -3  209.88   33.20
 -10   1  -3  111.69   25.00
 -10   1  -3  181.38   23.90
 -10   1  -3  148.29   38.30
 -10   1  -3  172.28   36.30
  10  -1   3  155.28   25.50
  10  -1   3  166.48   28.50
  10  -1   3  181.88   22.30
  10  -1   3  163.08   23.50
  10  -1   3  148.99   29.00
  10  -1   3  114.29   23.90
  10  -1   3  183.68   24.60
 -10   0  -3   25.10   24.40
 -10   0  -3   12.90   23.30
 -10   0  -3   -1.60   19.80
 -10   0  -3   11.20   19.50
 -10   0  -3   14.60   29.80
 -10   0  -3   37.70   28.00
  10   0   3   34.30   23.10
  10   0   3   16.60   25.80
  10   0   3   47.30   17.70
  10   0   3   22.00   22.00
  10   0   3   11.00   21.00
  10   0   3   21.30   20.20
  10   0   3   28.80   20.00
 -10  -1  -3  149.59   27.50
 -10  -1  -3  153.08   26.10
 -10  -1  -3  188.38   33.30
 -10  -1  -3  110.69   22.90
 -10  -1  -3  119.39   23.00
  10   1   3  170.08   29.60
  10   1   3  116.79   26.00
  10   1   3  106.69   21.20
  10   1   3  195.08   22.80
  10   1   3  172.78   24.80
  10   1   3  137.59   25.90
  10   1   3  152.28   26.40
 -10  -2  -3  502.35   43.10
 -10  -2  -3  458.55   43.40
 -10  -2  -3  454.55   52.29
 -10  -2  -3  450.55   56.89
 -10  -2  -3  461.45   36.20
 -10  -2  -3  507.55   43.20
  10   2   3  491.45   38.00
  10   2   3  492.25   42.40
  10   2   3  527.95   48.70
  10   2   3  465.55   42.40
  10   2   3  383.66   47.40
  10   2   3  419.86   35.30
  10   2   3  381.16   46.30
 -10  -3  -3  670.73   46.40
 -10  -3  -3  702.03   49.99
 -10  -3  -3  674.13   44.30
 -10  -3  -3  629.34   64.99
 -10  -3  -3  686.73   57.29
  10   3   3  652.13   55.89
  10   3   3  743.93   79.59
  10   3   3  699.13   45.80
  10   3   3  663.63   43.50
  10   3   3  806.72   45.00
  10   3   3  710.23   55.19
  10   3   3  615.74   45.60
  10   3   3  665.23   54.39
 -10  -4  -3  132.49   35.50
 -10  -4  -3   94.19   31.00
 -10  -4  -3  100.49   31.20
 -10  -4  -3   94.99   26.10
 -10  -4  -3   92.69   39.10
 -10  -4  -3   68.89   26.70
 -10  -4  -3   90.49   25.50
  10   4   3  136.09   32.80
  10   4   3   51.49   23.60
  10   4   3   44.30   25.70
  10   4   3   74.99   26.20
  10   4   3   68.09   32.80
  -9   5  -3   -4.80   48.60
  -9   5  -3   18.70   23.30
  -9   5  -3   -8.30   33.10
  -9   5  -3  -34.90   23.40
  -9   5  -3   12.30   21.50
   9  -5   3  -20.30   23.40
   9  -5   3   -1.50   21.80
   9  -5   3   -0.40   32.30
   9  -5   3   -3.10   26.40
  -9   4  -3   67.69   29.30
  -9   4  -3   87.69   30.10
  -9   4  -3  120.99   23.20
  -9   4  -3  130.39   25.70
  -9   4  -3   57.19   28.60
  -9   4  -3  146.49   30.40
   9  -4   3   99.99   24.80
   9  -4   3  109.79   23.90
   9  -4   3  130.59   23.00
   9  -4   3  149.29   32.30
   9  -4   3  123.69   22.70
  -9   3  -3  506.75   46.30
  -9   3  -3  439.76   35.50
  -9   3  -3  441.66   35.50
  -9   3  -3  460.85   37.20
  -9   3  -3  552.54   49.10
  -9   3  -3  473.15   37.60
  -9   3  -3  473.55   40.80
   9  -3   3  470.15   38.20
   9  -3   3  514.95   37.50
   9  -3   3  487.65   37.00
   9  -3   3  473.75   43.60
   9  -3   3  488.55   36.00
  -9   2  -3   29.70   20.40
  -9   2  -3   95.89   32.00
  -9   2  -3   41.00   21.60
  -9   2  -3   65.59   20.60
  -9   2  -3   -8.00   23.30
  -9   2  -3   44.30   34.30
   9  -2   3   40.20   25.40
   9  -2   3   32.00   15.50
   9  -2   3   22.20   19.70
   9  -2   3   51.89   30.20
   9  -2   3   34.40   20.00
  -9   1  -3   77.29   21.40
  -9   1  -3   59.19   19.50
  -9   1  -3   45.30   18.40
  -9   1  -3   67.29   23.80
  -9   1  -3  108.99   19.50
  -9   1  -3  130.59   31.30
  -9   1  -3   50.29   21.10
   9  -1   3   71.49   21.00
   9  -1   3   77.19   21.50
   9  -1   3   73.69   21.70
   9  -1   3   74.49   18.90
   9  -1   3   98.89   18.90
   9  -1   3   89.09   19.90
   9  -1   3   61.59   17.50
  -9   0  -3 1011.60   43.60
  -9   0  -3  924.01   56.49
  -9   0  -3  965.90   44.20
  -9   0  -3  955.50   43.70
  -9   0  -3 1000.00   46.40
  -9   0  -3 1016.80   51.09
   9   0   3 1011.40   47.00
   9   0   3  983.70   47.20
   9   0   3  991.80   38.20
   9   0   3 1005.50   47.40
   9   0   3 1015.10   42.80
   9   0   3  979.50   42.80
  -9  -1  -3   70.79   24.30
  -9  -1  -3   75.09   27.60
  -9  -1  -3   49.30   19.40
  -9  -1  -3   64.09   20.70
  -9  -1  -3   93.09   24.90
  -9  -1  -3   54.69   20.30
   9   1   3  125.99   25.90
   9   1   3   82.69   20.40
   9   1   3   78.59   18.30
   9   1   3   42.10   22.00
   9   1   3   35.30   20.00
   9   1   3   87.49   20.90
   9   1   3   78.49   23.00
  -9  -2  -3   45.20   22.20
  -9  -2  -3   39.60   29.40
  -9  -2  -3   53.39   23.90
  -9  -2  -3   49.99   23.20
  -9  -2  -3   59.79   21.30
  -9  -2  -3   30.00   25.50
   9   2   3   32.90   24.60
   9   2   3   62.99   21.90
   9   2   3   44.60   27.00
   9   2   3   60.99   21.30
   9   2   3   37.50   19.70
   9   2   3   59.69   26.00
   9   2   3   44.30   26.20
  -9  -3  -3  456.05   38.60
  -9  -3  -3  532.65   46.10
  -9  -3  -3  476.15   45.30
  -9  -3  -3  436.56   36.70
  -9  -3  -3  471.55   60.19
  -9  -3  -3  482.45   42.20
  -9  -3  -3  499.75   42.80
   9   3   3  448.86   48.90
   9   3   3  464.85   39.60
   9   3   3  447.06   39.10
   9   3   3  473.65   48.50
   9   3   3  454.65   40.10
   9   3   3  482.05   50.49
   9   3   3  406.66   49.50
   9   3   3  510.65   39.30
  -9  -4  -3  123.19   28.40
  -9  -4  -3  134.89   30.00
  -9  -4  -3   96.59   28.70
  -9  -4  -3  106.79   31.00
  -9  -4  -3  174.88   47.90
  -9  -4  -3  166.38   32.60
  -9  -4  -3  152.58   25.40
   9   4   3  119.59   31.90
   9   4   3  104.89   32.10
   9   4   3   59.59   28.10
   9   4   3   94.79   23.90
   9   4   3  156.38   27.10
  -9  -5  -3   -2.80   26.00
  -9  -5  -3   35.10   34.00
  -9  -5  -3   14.80   51.99
  -9  -5  -3   18.20   24.00
  -9  -5  -3  -14.80   19.20
  -9  -5  -3   23.60   27.80
   9   5   3  -40.90   33.60
   9   5   3  -29.60   24.80
   9   5   3   -6.80   28.60
   9   5   3  -26.70   25.40
   9   5   3    8.30   40.00
  -8   5  -3   16.20   21.00
  -8   5  -3  -19.70   22.40
  -8   5  -3   12.00   33.60
  -8   5  -3   55.29   34.70
  -8   5  -3   66.79   23.50
  -8   5  -3  -39.00   22.30
   8  -5   3   34.80   23.90
   8  -5   3   25.70   20.40
   8  -5   3    2.10   24.60
   8  -5   3   28.40   25.00
  -8   4  -3  248.88   41.90
  -8   4  -3  287.27   34.40
  -8   4  -3  318.57   39.60
  -8   4  -3  344.07   47.20
  -8   4  -3  272.17   30.70
  -8   4  -3  306.07   34.60
  -8   4  -3  328.47   36.60
   8  -4   3  305.27   33.20
   8  -4   3  301.47   36.30
   8  -4   3  286.57   29.80
   8  -4   3  335.67   32.40
   8  -4   3  277.27   39.90
  -8   3  -3  879.61   41.80
  -8   3  -3  890.31   45.50
  -8   3  -3  909.41   42.00
  -8   3  -3  914.01   44.90
  -8   3  -3  865.01   51.09
  -8   3  -3  898.41   43.20
  -8   3  -3  908.71   54.09
   8  -3   3  881.11   40.90
   8  -3   3  880.61   50.29
   8  -3   3  900.51   44.20
   8  -3   3  878.81   42.00
   8  -3   3  919.11   41.10
  -8   2  -3  526.45   32.00
  -8   2  -3  532.95   31.10
  -8   2  -3  537.85   32.90
  -8   2  -3  518.95   36.00
  -8   2  -3  522.25   33.30
  -8   2  -3  577.34   43.10
  -8   2  -3  515.05   42.60
   8  -2   3  541.15   32.30
   8  -2   3  488.75   33.70
   8  -2   3  515.05   32.70
   8  -2   3  507.45   33.50
   8  -2   3  532.95   40.70
  -8   1  -3   94.89   25.30
  -8   1  -3   60.29   19.40
  -8   1  -3   69.19   19.30
  -8   1  -3   67.49   16.50
  -8   1  -3   84.69   18.20
  -8   1  -3   49.99   16.40
  -8   1  -3   52.09   25.00
   8  -1   3   88.09   19.30
   8  -1   3   73.49   23.20
   8  -1   3   49.20   21.00
   8  -1   3   78.89   17.70
   8  -1   3   71.09   17.00
   8  -1   3   52.59   18.90
   8  -1   3   36.50   16.20
  -8   0  -3  899.91   51.49
  -8   0  -3  951.00   47.40
  -8   0  -3  861.01   40.20
  -8   0  -3 1059.39   56.99
  -8   0  -3  978.40   42.50
  -8   0  -3  988.80   40.70
   8   0   3  977.80   38.20
   8   0   3  934.71   40.00
   8   0   3  956.30   42.80
   8   0   3  984.70   43.50
   8   0   3  900.51   43.50
   8   0   3  912.11   46.00
  -8  -1  -3   65.59   25.50
  -8  -1  -3   58.49   20.80
  -8  -1  -3   35.40   19.50
  -8  -1  -3   54.59   19.30
  -8  -1  -3   46.30   19.30
  -8  -1  -3   20.20   17.10
   8   1   3   56.69   20.30
   8   1   3   47.30   18.30
   8   1   3   46.10   21.70
   8   1   3   70.99   24.10
   8   1   3   74.89   18.00
   8   1   3   58.99   16.50
   8   1   3   46.80   16.50
  -8  -2  -3  506.15   36.20
  -8  -2  -3  469.45   50.09
  -8  -2  -3  536.65   33.10
  -8  -2  -3  560.94   36.70
  -8  -2  -3  554.84   38.80
  -8  -2  -3  513.75   40.00
   8   2   3  544.25   34.80
   8   2   3  505.35   37.90
   8   2   3  534.25   38.30
   8   2   3  521.15   43.90
   8   2   3  511.55   34.60
   8   2   3  525.15   34.80
   8   2   3  578.64   43.70
   8   2   3  507.55   45.20
  -8  -3  -3  969.30   48.50
  -8  -3  -3  918.21   49.20
  -8  -3  -3  912.81   45.70
  -8  -3  -3  971.40   51.99
  -8  -3  -3  921.51   53.79
  -8  -3  -3  875.91   43.90
  -8  -3  -3  856.41   71.49
   8   3   3  969.00   48.70
   8   3   3  960.70   46.10
   8   3   3  927.11   45.40
   8   3   3  985.10   50.89
   8   3   3  929.81   57.89
   8   3   3  860.61   55.69
   8   3   3  775.22   86.59
  -8  -4  -3  305.27   41.80
  -8  -4  -3  309.77   31.10
  -8  -4  -3  258.97   34.00
  -8  -4  -3  274.97   43.80
  -8  -4  -3  326.47   40.10
  -8  -4  -3  322.97   39.30
  -8  -4  -3  309.67   39.20
   8   4   3  350.86   47.30
   8   4   3  333.77   40.00
   8   4   3  252.17   48.60
   8   4   3  309.27   38.50
   8   4   3  294.07   33.40
  -8  -5  -3    6.90   24.90
  -8  -5  -3   14.60   29.20
  -8  -5  -3   34.30   19.00
  -8  -5  -3   53.89   38.70
  -8  -5  -3   26.40   29.20
  -8  -5  -3   68.29   29.30
  -8  -5  -3   71.59   33.50
   8   5   3  -11.00   24.60
   8   5   3  -27.90   24.60
   8   5   3   12.20   25.20
   8   5   3   40.70   30.10
   8   5   3   25.90   30.10
   8   5   3   25.90   35.50
  -7   5  -3    5.40   19.30
  -7   5  -3   66.59   36.70
  -7   5  -3   27.50   28.30
  -7   5  -3  -15.00   21.30
  -7   5  -3  -26.00   21.30
  -7   5  -3   25.60   21.40
   7  -5   3   14.20   21.80
   7  -5   3   -1.30   24.20
   7  -5   3   12.90   21.80
   7  -5   3   14.20   31.00
  -7   4  -3  788.82   53.09
  -7   4  -3  711.43   40.50
  -7   4  -3  725.43   49.30
  -7   4  -3  707.03   39.60
  -7   4  -3  719.83   39.70
  -7   4  -3  778.82   46.10
   7  -4   3  727.93   42.20
   7  -4   3  761.52   42.90
   7  -4   3  734.43   39.10
   7  -4   3  767.32   47.20
  -7   3  -3  419.86   34.50
  -7   3  -3  453.85   43.90
  -7   3  -3  416.16   35.90
  -7   3  -3  442.66   40.80
  -7   3  -3  454.45   33.00
  -7   3  -3  418.46   30.40
  -7   3  -3  406.76   40.10
   7  -3   3  396.76   33.20
   7  -3   3  403.56   39.00
   7  -3   3  415.96   31.30
   7  -3   3  471.35   31.20
   7  -3   3  465.75   30.10
  -7   2  -3 2478.65   78.69
  -7   2  -3 2504.55   78.99
  -7   2  -3 2760.42   87.29
  -7   2  -3 2723.53   80.29
  -7   2  -3 2685.53   78.59
  -7   2  -3 2543.35   78.89
  -7   2  -3 2586.14   86.49
   7  -2   3 2751.02   79.29
   7  -2   3 2577.14   74.19
   7  -2   3 2560.84   79.09
   7  -2   3 2721.53   80.39
   7  -2   3 2642.14   85.79
   7  -2   3 2605.04   78.89
  -7   1  -3   40.90   19.20
  -7   1  -3    3.90   17.60
  -7   1  -3   17.20   20.50
  -7   1  -3   25.40   16.90
  -7   1  -3   14.90   15.90
  -7   1  -3   21.80   14.40
  -7   1  -3   16.20   15.20
   7  -1   3   -3.50   15.30
   7  -1   3    6.20   13.80
   7  -1   3   12.40   14.30
   7  -1   3   15.80   15.80
   7  -1   3   18.90   21.20
   7  -1   3   20.90   14.50
   7  -1   3   36.60   13.40
  -7   0  -3   95.79   18.60
  -7   0  -3  147.99   20.20
  -7   0  -3  113.89   21.00
  -7   0  -3  118.69   16.90
  -7   0  -3  112.29   16.90
  -7   0  -3  158.08   21.10
   7   0   3  106.39   18.50
   7   0   3  162.98   21.10
   7   0   3  189.88   24.10
   7   0   3  159.28   20.80
   7   0   3  156.78   18.40
   7   0   3  136.29   17.90
   7   0   3   92.49   18.60
  -7  -1  -3   30.40   20.70
  -7  -1  -3    5.70   16.80
  -7  -1  -3    7.90   18.40
  -7  -1  -3   18.10   17.60
  -7  -1  -3   28.60   17.80
  -7  -1  -3    7.80   16.20
   7   1   3   11.50   17.80
   7   1   3   14.70   14.90
   7   1   3   19.10   14.40
   7   1   3   -8.70   16.80
   7   1   3   24.70   14.40
   7   1   3    6.70   18.10
   7   1   3   14.60   19.50
  -7  -2  -3 2732.93   82.69
  -7  -2  -3 2713.33   84.19
  -7  -2  -3 2742.63   85.59
  -7  -2  -3 2672.53   95.49
  -7  -2  -3 2605.24   81.69
  -7  -2  -3 2736.93   84.59
   7   2   3 2613.94   84.69
   7   2   3 2664.43   88.89
   7   2   3 2668.13   91.49
   7   2   3 2641.24   85.29
   7   2   3 2593.24   82.49
   7   2   3 2662.13   81.89
   7   2   3 2684.33   87.29
   7   2   3 2616.64   81.69
  -7  -3  -3  459.85   33.80
  -7  -3  -3  456.65   37.80
  -7  -3  -3  443.06   53.19
  -7  -3  -3  424.66   37.80
  -7  -3  -3  461.95   33.10
  -7  -3  -3  452.35   41.50
  -7  -3  -3  453.35   41.30
   7   3   3  476.45   35.40
   7   3   3  461.75   44.90
   7   3   3  437.96   35.20
   7   3   3  438.66   44.30
   7   3   3  463.75   59.99
  -7  -4  -3  648.74   66.99
  -7  -4  -3  744.33   44.90
  -7  -4  -3  745.53   38.10
  -7  -4  -3  676.73   46.60
  -7  -4  -3  772.82   51.39
  -7  -4  -3  699.03   63.79
  -7  -4  -3  801.32   48.10
   7   4   3  767.32   43.30
   7   4   3  744.83   55.09
   7   4   3  702.33   55.49
   7   4   3  707.83   54.49
   7   4   3  730.93   40.20
  -7  -5  -3   10.00   24.90
  -7  -5  -3    6.70   29.40
  -7  -5  -3   29.00   38.20
  -7  -5  -3    5.40   24.20
  -7  -5  -3    1.70   16.40
  -7  -5  -3    8.70   28.30
   7   5   3  -10.80   28.00
   7   5   3   -3.10   26.10
   7   5   3  -18.70   23.40
   7   5   3  -23.40   24.40
   7   5   3  -17.40   23.20
   7   5   3   22.30   44.30
  -6   6  -3  154.48   25.50
  -6   6  -3  134.79   23.90
  -6   6  -3   66.19   25.60
  -6   6  -3   67.29   26.50
  -6   6  -3  184.88   37.80
  -6   6  -3  133.49   53.59
  -6   6  -3  172.48   41.00
   6  -6   3   65.89   29.90
   6  -6   3  127.69   37.40
   6  -6   3   93.49   26.50
   6  -6   3  129.49   29.40
   6  -6   3  115.79   21.90
   6  -6   3  176.38   30.90
  -6   5  -3   84.79   21.20
  -6   5  -3  128.49   33.20
  -6   5  -3   54.99   22.60
  -6   5  -3   88.29   34.00
   6  -5   3   60.39   24.10
   6  -5   3   58.19   28.60
   6  -5   3  104.99   23.60
   6  -5   3   74.99   19.80
   6  -5   3   95.39   23.50
  -6   4  -3  159.78   27.00
  -6   4  -3  102.39   20.90
  -6   4  -3  141.59   32.10
  -6   4  -3  106.99   20.30
  -6   4  -3   89.89   19.80
  -6   4  -3  144.89   32.70
  -6   4  -3   88.59   19.90
   6  -4   3  103.99   21.80
   6  -4   3  116.49   22.40
   6  -4   3  111.99   19.10
   6  -4   3  103.99   24.50
   6  -4   3  101.99   24.20
  -6   3  -3 2252.07   71.59
  -6   3  -3 2265.97   70.89
  -6   3  -3 2281.67   70.79
  -6   3  -3 2267.57   80.19
  -6   3  -3 2332.07   77.49
  -6   3  -3 2211.68   74.99
  -6   3  -3 2218.88   69.79
   6  -3   3 2260.77   76.99
   6  -3   3 2327.67   71.49
   6  -3   3 2286.57   69.99
   6  -3   3 2376.66   72.49
  -6   2  -3  433.56   25.50
  -6   2  -3  404.16   26.10
  -6   2  -3  426.76   25.70
  -6   2  -3  397.06   27.00
  -6   2  -3  413.96   34.50
  -6   2  -3  446.66   27.10
   6  -2   3  437.16   26.70
   6  -2   3  437.16   26.70
   6  -2   3  395.16   19.50
   6  -2   3  415.16   32.70
   6  -2   3  418.86   26.80
   6  -2   3  434.76   26.70
  -6   1  -3 1756.32   56.99
  -6   1  -3 1737.73   57.39
  -6   1  -3 1781.52   56.49
  -6   1  -3 1811.22   63.79
  -6   1  -3 1762.22   53.69
  -6   1  -3 1792.82   62.99
  -6   1  -3 1819.92   57.69
   6  -1   3 1835.32   56.59
   6  -1   3 1865.91   58.09
   6  -1   3 1862.11   56.99
   6  -1   3 1835.22   56.79
   6  -1   3 1828.32   62.99
   6  -1   3 1749.12   57.39
  -6   0  -3  552.94   32.00
  -6   0  -3  568.64   39.40
  -6   0  -3  562.54   29.50
  -6   0  -3  522.55   29.80
  -6   0  -3  593.24   36.90
  -6   0  -3  591.24   27.90
   6   0   3  596.24   32.30
   6   0   3  587.04   27.70
   6   0   3  628.94   24.50
   6   0   3  589.94   29.70
   6   0   3  601.04   35.50
   6   0   3  552.24   33.60
   6   0   3  530.45   32.60
  -6  -1  -3 1702.23   68.19
  -6  -1  -3 1787.32   58.89
  -6  -1  -3 1840.02   58.79
  -6  -1  -3 1870.81   62.69
  -6  -1  -3 1800.32   62.49
  -6  -1  -3 1765.72   59.29
   6   1   3 1911.11   62.29
   6   1   3 1815.82   62.19
   6   1   3 1871.01   58.69
   6   1   3 1868.31   66.69
   6   1   3 1868.31   57.19
   6   1   3 1785.42   62.49
   6   1   3 1740.63   63.19
  -6  -2  -3  376.36   41.70
  -6  -2  -3  405.76   26.90
  -6  -2  -3  428.76   34.20
  -6  -2  -3  441.66   31.00
  -6  -2  -3  384.16   30.30
  -6  -2  -3  399.76   34.70
   6   2   3  393.66   36.40
   6   2   3  409.56   29.50
   6   2   3  369.96   31.50
   6   2   3  466.45   37.40
   6   2   3  390.36   36.20
   6   2   3  390.46   31.10
   6   2   3  387.36   26.10
  -6  -3  -3 2289.27   76.39
  -6  -3  -3 2298.77   76.79
  -6  -3  -3 2346.27   78.89
  -6  -3  -3 2247.08   72.79
  -6  -3  -3 2284.27   74.99
  -6  -3  -3 2147.69   87.19
  -6  -3  -3 2334.97   74.49
   6   3   3 2250.27   81.59
   6   3   3 2342.27   72.69
   6   3   3 2247.78   73.89
   6   3   3 2310.27   84.29
  -6  -4  -3  131.89   31.00
  -6  -4  -3  110.09   23.50
  -6  -4  -3  104.99   31.20
  -6  -4  -3   73.19   25.70
  -6  -4  -3  110.39   26.40
  -6  -4  -3  124.29   29.60
  -6  -4  -3  125.59   20.20
   6   4   3  153.48   25.10
   6   4   3  137.99   28.90
   6   4   3   93.89   21.90
   6   4   3  116.19   27.80
   6   4   3  148.19   31.10
   6   4   3   85.69   25.30
  -6  -5  -3   70.79   52.59
  -6  -5  -3  107.39   29.70
  -6  -5  -3   93.99   28.10
  -6  -5  -3   84.09   27.30
  -6  -5  -3   70.29   29.30
  -6  -5  -3   76.29   27.70
  -6  -5  -3   91.19   17.70
   6   5   3  142.29   48.30
   6   5   3   47.70   27.30
   6   5   3   77.29   25.80
   6   5   3  104.29   32.10
   6   5   3   79.39   24.20
   6   5   3   86.59   33.50
  -6  -6  -3  129.39   37.10
  -6  -6  -3  164.58   34.90
  -6  -6  -3  181.08   33.00
  -6  -6  -3  124.29   28.30
  -6  -6  -3  192.58   50.99
  -6  -6  -3  207.18   36.10
   6   6   3  107.59   36.70
   6   6   3  119.59   36.60
   6   6   3  137.49   30.60
   6   6   3  158.58   29.20
   6   6   3  182.28   36.30
  -5   6  -3  -27.10   22.90
  -5   6  -3   12.30   20.00
  -5   6  -3   30.00   34.30
  -5   6  -3  130.39   38.60
  -5   6  -3   17.80   21.50
  -5   6  -3   27.60   36.50
   5  -6   3   37.20   23.40
   5  -6   3   17.80   23.70
   5  -6   3   26.70   18.80
   5  -6   3   26.50   33.50
   5  -6   3  -22.30   37.10
   5  -6   3    9.80   19.60
  -5   5  -3   71.39   19.80
  -5   5  -3   44.80   33.90
  -5   5  -3  156.18   40.50
  -5   5  -3  100.49   32.30
  -5   5  -3   69.39   32.70
  -5   5  -3   68.29   20.90
  -5   5  -3   70.39   21.40
   5  -5   3   89.59   32.20
   5  -5   3   67.19   17.70
   5  -5   3   85.79   23.50
   5  -5   3   82.89   22.90
   5  -5   3   91.89   23.40
   5  -5   3   75.39   19.00
  -5   4  -3  373.56   43.50
  -5   4  -3  356.56   33.70
  -5   4  -3  298.57   42.80
  -5   4  -3  387.76   29.40
  -5   4  -3  402.66   31.70
  -5   4  -3  427.56   30.90
  -5   4  -3  388.96   40.90
   5  -4   3  377.06   29.50
   5  -4   3  371.56   34.80
   5  -4   3  389.16   32.30
   5  -4   3  377.96   40.70
  -5   3  -3 1061.39   50.89
  -5   3  -3 1021.90   38.90
  -5   3  -3 1066.49   40.40
  -5   3  -3 1043.30   47.00
  -5   3  -3 1123.69   46.70
  -5   3  -3 1060.19   40.20
  -5   3  -3 1065.29   41.30
   5  -3   3 1145.59   41.10
   5  -3   3 1111.99   46.30
   5  -3   3 1052.59   42.50
   5  -3   3 1123.79   48.80
   5  -3   3 1101.39   39.70
  -5   2  -3  762.82   40.70
  -5   2  -3  793.12   34.20
  -5   2  -3  839.82   40.30
  -5   2  -3  791.62   31.60
  -5   2  -3  810.62   31.90
  -5   2  -3  803.42   32.90
  -5   2  -3  832.52   34.00
   5  -2   3  875.81   32.30
   5  -2   3  790.02   32.50
   5  -2   3  836.82   39.20
   5  -2   3  840.42   33.30
  -5   1  -3 2117.39   63.39
  -5   1  -3 1991.30   61.89
  -5   1  -3 2166.98   59.89
  -5   1  -3 2123.39   69.09
  -5   1  -3 2073.19   62.59
  -5   1  -3 1995.20   62.59
  -5   1  -3 2036.10   68.99
   5  -1   3 2067.69   63.29
   5  -1   3 2062.99   68.49
   5  -1   3 2192.58   62.39
   5  -1   3 2155.38   62.59
   5  -1   3 1997.40   62.69
   5  -1   3 1998.00   61.79
  -5   0  -3  162.88   22.60
  -5   0  -3  182.18   30.20
  -5   0  -3  184.88   31.80
  -5   0  -3  160.48   18.90
  -5   0  -3  178.48   19.40
  -5   0  -3  161.18   17.70
   5   0   3  168.88   19.40
   5   0   3  173.38   22.00
   5   0   3  159.18   27.80
   5   0   3  178.38   15.90
   5   0   3  180.68   23.00
   5   0   3  118.09   17.60
   5   0   3  203.18   20.50
  -5  -1  -3 2114.59   65.69
  -5  -1  -3 2191.08   68.59
  -5  -1  -3 2067.89   64.39
  -5  -1  -3 1996.70   64.19
  -5  -1  -3 2084.19   67.09
  -5  -1  -3 2110.69   72.89
   5   1   3 2011.80   67.99
   5   1   3 2092.29   62.89
   5   1   3 2105.29   71.49
   5   1   3 2074.49   67.99
   5   1   3 2058.59   63.09
   5   1   3 2003.70   69.19
   5   1   3 2332.57   72.69
   5   1   3 2057.79   63.29
  -5  -2  -3  785.32   35.50
  -5  -2  -3  766.32   35.50
  -5  -2  -3  739.23   45.60
  -5  -2  -3  764.52   37.10
  -5  -2  -3  864.41   37.20
  -5  -2  -3  763.72   40.30
   5   2   3  835.92   33.50
   5   2   3  812.02   38.90
   5   2   3  808.12   42.40
   5   2   3  822.32   42.90
   5   2   3  753.42   40.20
   5   2   3  731.73   37.00
   5   2   3  818.92   35.80
  -5  -3  -3 1029.80   47.40
  -5  -3  -3 1124.19   42.50
  -5  -3  -3 1044.90   42.30
  -5  -3  -3 1087.39   45.90
  -5  -3  -3 1008.00   56.69
  -5  -3  -3 1061.59   47.10
  -5  -3  -3 1096.99   46.20
   5   3   3 1087.59   44.50
   5   3   3 1134.39   48.20
   5   3   3 1085.59   53.39
   5   3   3 1070.49   52.09
   5   3   3 1116.99   44.20
  -5  -4  -3  339.57   37.20
  -5  -4  -3  369.36   37.00
  -5  -4  -3  380.66   28.20
  -5  -4  -3  282.87   47.20
  -5  -4  -3  358.16   35.80
  -5  -4  -3  331.17   38.10
  -5  -4  -3  326.17   52.29
   5   4   3  421.06   42.90
   5   4   3  390.96   35.10
   5   4   3  378.86   51.79
   5   4   3  370.36   31.20
   5   4   3  392.46   50.19
  -5  -5  -3   60.59   26.90
  -5  -5  -3   62.39   27.60
  -5  -5  -3  111.09   28.10
  -5  -5  -3   94.79   34.80
  -5  -5  -3   63.49   29.20
  -5  -5  -3   84.99   17.00
  -5  -5  -3   57.59   23.60
   5   5   3   94.29   30.50
   5   5   3   75.79   27.30
   5   5   3   48.10   20.70
   5   5   3   65.59   22.80
   5   5   3   70.19   28.60
   5   5   3   76.89   31.00
  -5  -6  -3   28.70   38.60
  -5  -6  -3   49.30   31.90
  -5  -6  -3   63.39   28.70
  -5  -6  -3   -4.60   25.80
  -5  -6  -3    4.60   45.60
  -5  -6  -3   63.69   54.19
   5   6   3   13.20   34.10
   5   6   3    5.90   28.90
   5   6   3    1.90   23.40
   5   6   3    5.10   31.10
   5   6   3  -30.30   23.80
   5   6   3  -23.70   49.20
  -4   6  -3   17.80   40.80
  -4   6  -3   39.80   31.50
  -4   6  -3   41.70   19.90
  -4   6  -3  -10.50   23.20
   4  -6   3   43.90   20.50
   4  -6   3   27.80   19.70
   4  -6   3   11.40   28.60
   4  -6   3   30.80   18.70
  -4   5  -3  253.67   31.60
  -4   5  -3  298.97   37.30
  -4   5  -3  217.68   29.70
  -4   5  -3  230.38   32.50
  -4   5  -3  269.97   29.30
  -4   5  -3  171.78   35.70
   4  -5   3  257.97   27.40
   4  -5   3  272.67   35.40
   4  -5   3  235.98   30.10
   4  -5   3  227.38   28.40
   4  -5   3  260.07   33.50
   4  -5   3  175.28   27.70
  -4   4  -3   66.39   16.80
  -4   4  -3   96.39   20.50
  -4   4  -3   95.99   27.10
  -4   4  -3   63.49   17.40
  -4   4  -3   96.69   18.40
   4  -4   3   84.99   15.90
   4  -4   3   59.19   31.10
   4  -4   3   74.59   16.50
   4  -4   3   88.19   29.50
   4  -4   3   57.39   19.40
   4  -4   3   65.59   20.60
  -4   3  -3 1060.59   38.00
  -4   3  -3 1015.70   48.40
  -4   3  -3  959.00   37.10
  -4   3  -3 1017.50   38.70
  -4   3  -3 1063.39   42.70
  -4   3  -3 1074.79   38.10
   4  -3   3 1023.20   39.30
   4  -3   3 1059.29   37.40
   4  -3   3 1019.10   42.60
   4  -3   3 1088.09   40.40
   4  -3   3 1030.20   45.90
  -4   2  -3  235.58   19.00
  -4   2  -3  244.48   30.50
  -4   2  -3  264.07   20.50
  -4   2  -3  266.07   28.20
  -4   2  -3  233.38   21.80
  -4   2  -3  301.07   21.40
   4  -2   3  259.07   20.80
   4  -2   3  248.88   21.40
   4  -2   3  196.18   27.70
   4  -2   3  246.18   20.40
  -4   1  -3  172.18   21.70
  -4   1  -3  198.58   18.90
  -4   1  -3  201.68   20.00
  -4   1  -3  199.78   16.70
  -4   1  -3  208.58   21.00
  -4   1  -3  244.68   32.20
   4  -1   3  220.58   28.20
   4  -1   3  176.58   27.00
   4  -1   3  223.88   20.20
   4  -1   3  182.88   21.60
   4  -1   3  252.37   19.70
  -4   0  -3 3932.81  113.29
  -4   0  -3 3789.92  111.09
  -4   0  -3 3734.93  106.99
  -4   0  -3 3752.72  107.39
  -4   0  -3 4120.59  120.69
  -4   0  -3 3817.92  106.59
  -4   0  -3 3900.31  106.59
   4   0   3 3841.32  109.09
   4   0   3 4040.70  108.29
   4   0   3 3937.01  106.69
   4   0   3 3820.12  107.89
   4   0   3 3827.42  110.99
  -4  -1  -3  163.98   23.70
  -4  -1  -3  176.08   22.90
  -4  -1  -3  177.08   24.00
  -4  -1  -3  123.79   19.90
  -4  -1  -3  139.79   18.70
  -4  -1  -3  196.98   27.10
  -4  -1  -3  225.88   31.20
   4   1   3  230.38   28.80
   4   1   3  192.68   20.00
   4   1   3  192.58   21.40
   4   1   3  154.58   20.70
   4   1   3  212.68   23.40
   4   1   3  184.08   22.00
   4   1   3  145.79   19.80
  -4  -2  -3  218.38   24.70
  -4  -2  -3  242.28   25.20
  -4  -2  -3  211.48   23.30
  -4  -2  -3  212.28   24.10
  -4  -2  -3  205.68   25.50
  -4  -2  -3  253.67   34.20
   4   2   3  221.08   21.70
   4   2   3  202.88   28.10
   4   2   3  256.47   25.50
   4   2   3  300.77   32.10
   4   2   3  234.68   32.40
  -4  -3  -3 1021.00   53.89
  -4  -3  -3 1008.70   43.20
  -4  -3  -3  989.20   47.10
  -4  -3  -3 1004.60   47.70
  -4  -3  -3 1018.00   40.30
  -4  -3  -3 1038.90   44.40
  -4  -3  -3 1003.50   39.60
   4   3   3 1066.19   48.50
   4   3   3 1002.20   41.90
   4   3   3 1052.79   49.20
   4   3   3 1104.69   42.20
   4   3   3 1083.09   45.60
   4   3   3 1055.59   50.29
  -4  -4  -3   80.19   28.50
  -4  -4  -3   64.29   27.60
  -4  -4  -3   76.89   17.00
  -4  -4  -3   81.69   28.40
  -4  -4  -3   67.09   23.80
  -4  -4  -3   61.79   20.80
  -4  -4  -3   42.30   23.00
   4   4   3   95.19   27.90
   4   4   3   74.89   21.30
   4   4   3   93.49   27.80
   4   4   3   63.19   21.70
   4   4   3   62.59   20.20
   4   4   3   64.39   22.90
  -4  -5  -3  254.37   34.50
  -4  -5  -3  243.88   25.40
  -4  -5  -3  282.57   39.30
  -4  -5  -3  245.98   37.10
  -4  -5  -3  289.27   54.69
  -4  -5  -3  250.67   33.60
  -4  -5  -3  322.97   33.60
   4   5   3  241.38   35.00
   4   5   3  353.86   37.20
   4   5   3  309.67   37.20
   4   5   3  275.37   35.30
   4   5   3  211.18   33.60
   4   5   3  272.87   35.40
  -4  -6  -3   22.60   26.70
  -4  -6  -3   79.59   31.80
  -4  -6  -3   56.49   27.30
  -4  -6  -3   35.40   32.00
   4   6   3   19.00   27.60
   4   6   3   17.60   31.50
   4   6   3   53.99   25.60
   4   6   3   21.90   28.70
  -3   6  -3  508.65   34.50
  -3   6  -3  424.56   38.00
  -3   6  -3  537.55   66.39
  -3   6  -3  499.15   45.30
  -3   6  -3  443.16   40.10
  -3   6  -3  545.15   49.70
   3  -6   3  501.65   33.90
   3  -6   3  599.84   48.20
   3  -6   3  361.76   47.40
   3  -6   3  537.15   30.40
   3  -6   3  449.86   34.70
  -3   5  -3  588.64   35.50
  -3   5  -3  553.04   61.59
  -3   5  -3  579.14   48.40
  -3   5  -3  557.04   37.60
  -3   5  -3  600.04   35.00
  -3   5  -3  549.15   32.90
   3  -5   3  563.34   33.20
   3  -5   3  559.44   32.30
   3  -5   3  562.04   38.20
   3  -5   3  588.64   34.00
   3  -5   3  540.15   46.00
   3  -5   3  567.74   39.10
  -3   4  -3 2876.71   85.29
  -3   4  -3 2986.30   85.69
  -3   4  -3 2911.61   94.69
  -3   4  -3 2911.61   85.59
  -3   4  -3 2931.21   84.69
   3  -4   3 2889.91   93.99
   3  -4   3 2839.22   87.39
   3  -4   3 2855.91   83.99
   3  -4   3 2842.02   86.89
   3  -4   3 2876.71   87.79
   3  -4   3 2837.12   84.19
  -3   3  -3  622.84   27.70
  -3   3  -3  590.44   37.00
  -3   3  -3  629.64   30.40
  -3   3  -3  586.74   27.10
  -3   3  -3  614.14   26.80
  -3   3  -3  621.84   26.50
   3  -3   3  614.04   35.60
   3  -3   3  562.04   25.40
   3  -3   3  541.25   25.80
   3  -3   3  572.94   29.40
   3  -3   3  568.64   30.90
   3  -3   3  602.14   28.70
  -3   2  -3 6699.43  180.98
  -3   2  -3 6416.16  174.88
  -3   1  -3 1228.08   38.60
  -3   1  -3 1293.87   39.00
  -3   1  -3 1335.37   39.40
  -3   1  -3 1289.97   39.70
  -3   1  -3 1262.17   39.20
  -3   1  -3 1339.37   45.70
  -3   1  -3 1351.56   46.40
  -3   1  -3 1301.17   40.10
   3  -1   3 1283.67   39.30
   3  -1   3 1188.58   39.10
   3  -1   3 1224.18   45.30
   3  -1   3 1306.07   39.90
   3  -1   3 1339.87   39.20
  -3   0  -3   72.79   15.70
  -3   0  -3   94.19   11.60
  -3   0  -3   85.79   12.70
  -3   0  -3   73.99   13.80
  -3   0  -3   66.49   10.00
  -3   0  -3   84.89   12.90
   3   0   3   79.59   12.70
   3   0   3   69.19   17.10
   3   0   3   70.79   10.60
   3   0   3   64.19   12.10
   3   0   3  103.19    8.10
   3   0   3   95.99   14.10
   3   0   3   89.59   12.30
  -3  -1  -3 1251.57   42.50
  -3  -1  -3 1187.38   39.50
  -3  -1  -3 1308.87   46.60
  -3  -1  -3 1245.68   41.20
  -3  -1  -3 1270.37   46.60
  -3  -1  -3 1244.78   44.50
  -3  -1  -3 1320.47   46.30
   3   1   3 1193.98   44.40
   3   1   3 1246.78   46.00
   3   1   3 1252.17   43.80
   3   1   3 1204.58   39.80
   3   1   3 1170.88   43.20
   3   1   3 1158.68   46.50
  -3  -2  -3 6596.24  180.68
  -3  -2  -3 6591.94  179.18
  -3  -2  -3 6678.23  181.48
  -3  -2  -3 6611.44  182.78
   3   2   3 6339.07  177.78
   3   2   3 6495.05  182.58
   3   2   3 6761.62  178.58
  -3  -3  -3  508.05   35.10
  -3  -3  -3  576.14   31.80
  -3  -3  -3  536.95   28.60
  -3  -3  -3  492.35   33.80
  -3  -3  -3  568.14   32.70
  -3  -3  -3  578.04   34.40
  -3  -3  -3  597.44   44.30
   3   3   3  570.74   31.10
   3   3   3  591.64   38.30
   3   3   3  653.73   41.30
   3   3   3  574.04   31.90
   3   3   3  603.74   38.50
   3   3   3  573.94   37.40
  -3  -4  -3 2939.71   90.09
  -3  -4  -3 2883.31   95.39
  -3  -4  -3 2891.61   94.89
  -3  -4  -3 2894.61   85.09
  -3  -4  -3 2836.32   91.19
  -3  -4  -3 2920.51  105.39
  -3  -4  -3 2750.62   92.49
   3   4   3 3005.20   96.29
   3   4   3 2866.21   94.79
   3   4   3 2973.60   89.89
   3   4   3 2765.12   87.99
   3   4   3 3021.60  102.09
   3   4   3 3107.09   95.89
  -3  -5  -3  572.64   47.20
  -3  -5  -3  550.44   45.20
  -3  -5  -3  602.84   35.60
  -3  -5  -3  596.14   44.60
  -3  -5  -3  611.64   48.90
  -3  -5  -3  594.94   60.69
  -3  -5  -3  578.64   41.80
   3   5   3  588.24   39.70
   3   5   3  590.14   47.00
   3   5   3  608.54   41.10
   3   5   3  530.65   46.30
   3   5   3  550.34   54.29
   3   5   3  578.04   47.30
  -3  -6  -3  543.05   49.80
  -3  -6  -3  579.34   49.90
  -3  -6  -3  458.55   38.80
  -3  -6  -3  534.85   46.80
  -3  -6  -3  533.35   56.49
   3   6   3  600.04   50.99
   3   6   3  569.64   42.30
   3   6   3  533.75   47.80
   3   6   3  541.65   47.60
   3   6   3  490.75   49.99
   3   6   3  493.05   57.79
  -2   6  -3  193.98   28.10
  -2   6  -3  161.18   25.40
  -2   6  -3  203.58   32.20
  -2   6  -3  160.28   36.10
  -2   6  -3  164.18   27.70
  -2   6  -3  251.87   29.70
   2  -6   3  218.08   37.30
   2  -6   3  226.08   28.40
   2  -6   3  161.38   22.50
  -2   5  -3  117.89   18.60
  -2   5  -3  123.49   28.60
  -2   5  -3   82.69   29.90
  -2   5  -3  101.39   20.90
  -2   5  -3  116.69   22.30
  -2   5  -3   84.69   18.60
   2  -5   3  130.99   18.80
   2  -5   3   92.89   18.90
   2  -5   3   81.39   24.40
   2  -5   3  123.69   18.30
   2  -5   3  124.29   23.10
  -2   4  -3   62.09   16.10
  -2   4  -3   38.60   21.80
  -2   4  -3   49.20   14.80
  -2   4  -3   40.90   16.60
  -2   4  -3   27.30   27.30
  -2   4  -3   62.19   16.10
   2  -4   3   43.60   14.20
   2  -4   3   57.89   13.90
   2  -4   3   56.79   16.10
   2  -4   3   34.40   17.40
   2  -4   3   52.29   18.40
   2  -4   3   37.70   20.40
  -2   3  -3 2684.13   84.89
  -2   3  -3 2761.12   77.69
  -2   3  -3 2714.83   78.99
  -2   3  -3 2694.23   77.39
  -2   3  -3 2773.62   77.09
  -2   3  -3 2705.93   77.69
   2  -3   3 2747.63   83.99
   2  -3   3 2637.34   76.69
   2  -3   3 2781.02   76.79
   2  -3   3 2639.34   78.49
   2  -3   3 2740.03   79.39
   2  -3   3 2705.73   78.49
  -2   2  -3 1815.62   52.09
  -2   2  -3 1806.02   59.99
  -2   2  -3 1712.93   51.59
  -2   2  -3 1757.02   52.39
  -2   2  -3 1783.92   52.39
  -2   2  -3 1938.51   61.49
   2  -2   3 1794.92   59.19
   2  -2   3 1784.52   51.69
   2  -2   3 1798.12   56.59
   2  -2   3 1734.23   53.09
   2  -2   3 1832.92   53.49
  -2   1  -3 4291.47  116.09
   2  -1   3 4420.16  123.69
  -2   0  -3   -1.60    9.90
  -2   0  -3   -4.90    9.70
  -2   0  -3    1.40   12.90
  -2   0  -3    6.20    7.60
  -2   0  -3   13.20    8.60
   2   0   3    3.80    8.30
   2   0   3   -6.20   12.90
   2   0   3    3.50   10.80
   2   0   3   -7.00    9.90
   2   0   3    0.90    8.30
   2   0   3   -2.90    9.30
  -2  -1  -3 4350.56  120.99
  -2  -1  -3 4560.04  119.99
  -2  -1  -3 4469.85  121.79
  -2  -1  -3 4627.24  121.89
  -2  -1  -3 4185.88  126.79
   2   1   3 4434.96  122.69
   2   1   3 4217.28  120.79
   2   1   3 4452.15  121.59
  -2  -2  -3 1733.63   62.39
  -2  -2  -3 1742.73   57.09
  -2  -2  -3 1702.73   57.69
  -2  -2  -3 1678.33   60.39
  -2  -2  -3 1655.93   54.39
  -2  -2  -3 1689.73   66.99
  -2  -2  -3 1707.13   56.09
  -2  -2  -3 1785.62   61.59
   2   2   3 1683.83   57.99
   2   2   3 1749.92   55.89
   2   2   3 1855.01   57.99
   2   2   3 1783.62   59.89
   2   2   3 1937.61   62.49
   2   2   3 1718.53   60.79
  -2  -3  -3 2686.33   84.09
  -2  -3  -3 2669.83   90.29
  -2  -3  -3 2593.54   79.99
  -2  -3  -3 2561.54   82.09
  -2  -3  -3 2596.64   81.49
  -2  -3  -3 2570.74   83.49
  -2  -3  -3 2628.14   79.49
  -2  -3  -3 2589.04   83.99
   2   3   3 2766.02   83.89
   2   3   3 2664.33   79.59
   2   3   3 2592.34   83.59
   2   3   3 2742.33   88.09
   2   3   3 2753.52   84.49
   2   3   3 2666.73   78.49
  -2  -4  -3   54.69   22.10
  -2  -4  -3   47.50   20.20
  -2  -4  -3   33.00   27.20
  -2  -4  -3   48.40   23.50
  -2  -4  -3   35.40   18.50
  -2  -4  -3   33.80   16.50
  -2  -4  -3   17.90   21.90
   2   4   3   45.40   22.50
   2   4   3   15.00   21.00
   2   4   3   38.40   20.90
   2   4   3   38.40   19.00
   2   4   3   37.40   22.70
   2   4   3   36.00   16.90
  -2  -5  -3  124.69   25.90
  -2  -5  -3   96.99   28.10
  -2  -5  -3  106.79   27.70
  -2  -5  -3   74.29   26.10
  -2  -5  -3  121.59   27.20
  -2  -5  -3  116.09   20.90
   2   5   3   80.69   20.90
   2   5   3  110.49   29.60
   2   5   3  124.49   26.40
   2   5   3  121.19   28.90
   2   5   3   99.29   22.60
   2   5   3  101.49   30.70
  -2  -6  -3  252.47   35.50
  -2  -6  -3  259.97   33.60
  -2  -6  -3  252.27   35.70
  -2  -6  -3  177.18   29.50
   2   6   3  245.58   30.20
   2   6   3  138.59   32.50
   2   6   3  175.18   31.70
   2   6   3  222.08   28.90
   2   6   3  168.98   33.60
   2   6   3  214.28   34.00
  -1   6  -3  832.32   48.30
  -1   6  -3 1019.20   38.80
  -1   6  -3  868.91   40.90
  -1   6  -3  896.21   71.09
  -1   6  -3  897.31   54.09
  -1   6  -3  920.71   45.90
  -1   6  -3  834.92   43.00
   1  -6   3  841.02   43.10
   1  -6   3  939.11   48.90
   1  -6   3  986.90   58.49
   1  -6   3  849.32   40.60
  -1   5  -3 1792.12   62.49
  -1   5  -3 1757.32   86.39
  -1   5  -3 1793.82   60.49
  -1   5  -3 1895.11   59.89
  -1   5  -3 1810.92   71.69
  -1   5  -3 1745.43   63.29
   1  -5   3 1828.62   59.89
   1  -5   3 1741.73   70.69
   1  -5   3 1906.91   56.49
   1  -5   3 1867.91   61.09
  -1   4  -3  344.67   24.50
  -1   4  -3  319.57   23.00
  -1   4  -3  288.97   47.70
  -1   4  -3  288.17   21.70
  -1   4  -3  344.67   25.60
  -1   4  -3  367.56   36.40
  -1   4  -3  332.07   27.50
   1  -4   3  313.37   22.80
   1  -4   3  317.17   27.80
   1  -4   3  337.47   27.70
   1  -4   3  326.97   24.40
   1  -4   3  350.66   34.00
  -1   3  -3 3033.90   83.99
  -1   3  -3 3041.20   84.59
  -1   3  -3 2971.30   90.89
  -1   3  -3 3099.59   84.99
  -1   3  -3 2967.10   82.39
  -1   3  -3 2895.31   84.19
  -1   3  -3 2940.41   85.29
  -1   3  -3 2988.70  100.99
   1  -3   3 2958.70   83.79
   1  -3   3 2985.00   84.89
   1  -3   3 3177.08   87.89
   1  -3   3 2953.50   85.99
   1  -3   3 3027.60   85.99
   1  -3   3 3144.99   90.89
  -1   2  -3 4933.61  132.39
  -1   2  -3 4845.22  132.49
   1  -2   3 5018.70  133.09
   1  -2   3 5099.89  135.09
   1  -2   3 4938.51  133.09
  -1   0  -3  -17.20   11.90
  -1   0  -3   -3.20    6.90
  -1   0  -3   -0.40    8.60
  -1   0  -3   -4.10    7.10
  -1   0  -3  -12.80    8.60
   1   0   3   -2.40    7.30
   1   0   3  -15.30    8.80
   1   0   3    7.30    4.60
   1   0   3    3.50    9.60
   1   0   3   -2.70    7.10
  -1  -2  -3 4714.33  136.89
  -1  -2  -3 4925.91  138.29
  -1  -2  -3 4858.61  135.09
  -1  -2  -3 4784.92  134.79
  -1  -2  -3 4851.41  140.49
   1   2   3 4773.62  134.79
   1   2   3 5046.80  134.99
   1   2   3 5516.75  140.89
   1   2   3 4780.32  136.79
   1   2   3 4911.11  137.99
   1   2   3 5055.89  137.99
  -1  -3  -3 3024.10   88.09
  -1  -3  -3 2862.81   89.49
  -1  -3  -3 3045.90   91.29
  -1  -3  -3 2771.02   90.59
  -1  -3  -3 3044.80   88.09
  -1  -3  -3 3036.00   97.59
   1   3   3 2948.30   90.99
   1   3   3 3115.99   95.89
   1   3   3 2940.31   87.39
   1   3   3 2956.10   90.69
   1   3   3 2931.81   90.89
   1   3   3 3041.10   89.89
  -1  -4  -3  343.07   30.80
  -1  -4  -3  308.17   34.10
  -1  -4  -3  336.07   32.80
  -1  -4  -3  276.57   36.60
   1   4   3  300.87   30.10
   1   4   3  334.27   41.80
   1   4   3  316.67   35.10
   1   4   3  281.17   32.80
   1   4   3  350.36   36.20
   1   4   3  300.17   35.60
   1   4   3  313.77   26.60
  -1  -5  -3 1909.21   68.89
  -1  -5  -3 1854.31   67.09
  -1  -5  -3 1869.41   73.89
  -1  -5  -3 1926.61   73.29
  -1  -5  -3 1680.63   71.59
  -1  -5  -3 1876.81   59.69
   1   5   3 1867.41   66.99
   1   5   3 1872.31   72.29
   1   5   3 1987.70   66.89
   1   5   3 1876.01   82.99
   1   5   3 1798.52   71.49
   1   5   3 1845.32   71.09
   1   5   3 1797.52   71.49
  -1  -6  -3  832.12   53.29
  -1  -6  -3  988.10   55.29
  -1  -6  -3  756.02   35.80
  -1  -6  -3  809.92   38.90
  -1  -6  -3  926.31   49.40
  -1  -6  -3 1011.80   56.99
  -1  -6  -3  950.20   51.79
   1   6   3  849.72   52.69
   1   6   3  887.71   54.09
   1   6   3  747.63   64.69
   1   6   3  911.21   48.80
   1   6   3  889.21   54.59
   1   6   3  907.71   47.50
   1   6   3  880.71   51.39
   0   6  -3  118.09   35.90
   0   6  -3   82.09   19.90
   0   6  -3   99.09   19.90
   0   6  -3   79.19   25.20
   0   6  -3   97.59   27.40
   0   6  -3   64.49   22.70
   0   6  -3   87.49   19.50
   0  -6   3  121.89   24.30
   0  -6   3   98.69   20.10
   0  -6   3  101.09   21.10
   0  -6   3  124.59   25.70
   0   5  -3 1009.30   41.00
   0   5  -3 1089.89   68.79
   0   5  -3 1006.10   46.90
   0   5  -3 1073.09   54.39
   0   5  -3 1081.29   42.40
   0   5  -3 1044.40   45.00
   0   5  -3  943.01   41.50
   0  -5   3 1019.70   52.59
   0  -5   3 1047.60   42.90
   0  -5   3 1006.40   41.10
   0  -5   3 1027.40   47.10
   0   4  -3  154.48   17.20
   0   4  -3  152.18   18.30
   0   4  -3  145.79   21.00
   0   4  -3  164.58   19.30
   0   4  -3  181.68   24.80
   0   4  -3  151.88   29.60
   0   4  -3  151.28   19.90
   0  -4   3  108.79   15.70
   0  -4   3  176.68   17.00
   0  -4   3  147.19   15.90
   0  -4   3  230.88   26.10
   0   3  -3 1725.43   68.49
   0   3  -3 1720.73   50.89
   0   3  -3 1739.23   57.99
   0   3  -3 1675.73   52.59
   0   3  -3 1641.04   49.99
   0   3  -3 1689.83   48.90
   0   3  -3 1687.83   51.79
   0  -3   3 1632.44   52.59
   0  -3   3 1624.64   49.30
   0  -3   3 1729.13   57.39
   0  -3   3 1711.73   50.09
   0   2  -3 2908.21   79.69
   0   2  -3 2819.82   78.59
   0   2  -3 2868.81   83.89
   0   2  -3 2867.81   79.19
   0   2  -3 2881.71   91.89
   0   2  -3 2944.51   78.99
   0   2  -3 2836.62   78.29
   0  -2   3 2898.21   79.49
   0  -2   3 3001.00   83.79
   0  -2   3 2836.72   79.99
   0  -2   3 2880.11   78.29
   0  -2   3 2964.90   80.09
   0  -2  -3 2837.62   82.79
   0  -2  -3 2900.61   88.69
   0  -2  -3 2930.01   82.59
   0  -2  -3 2819.72   84.69
   0  -2  -3 2890.61   85.29
   0   2   3 2900.51   82.79
   0   2   3 2874.41   85.09
   0   2   3 2810.72   84.29
   0   2   3 2861.81   82.39
   0   2   3 2816.22   85.19
   0   2   3 3076.99   84.59
   0   2   3 2916.91   93.59
   0  -3  -3 1695.63   56.79
   0  -3  -3 1758.62   59.19
   0  -3  -3 1721.33   58.89
   0  -3  -3 1727.63   60.39
   0   3   3 1709.23   64.99
   0   3   3 1688.83   58.69
   0   3   3 1601.74   55.49
   0   3   3 1757.22   59.39
   0   3   3 1792.12   59.09
   0   3   3 1737.03   56.29
   0   3   3 1633.54   57.39
   0  -4  -3  185.68   23.50
   0  -4  -3  153.38   22.10
   0  -4  -3  174.18   23.40
   0  -4  -3  143.59   24.40
   0   4   3  137.09   24.10
   0   4   3  126.99   18.90
   0   4   3  147.39   20.80
   0   4   3  144.29   23.20
   0   4   3  145.99   24.60
   0   4   3  196.48   24.60
   0   4   3  172.78   25.70
   0  -5  -3  984.40   52.89
   0  -5  -3  928.71   38.90
   0  -5  -3 1097.89   52.29
   0  -5  -3 1085.49   48.90
   0  -5  -3 1039.50   54.79
   0   5   3 1068.29   53.09
   0   5   3 1013.70   51.19
   0   5   3 1124.19   55.29
   0   5   3 1028.90   49.70
   0   5   3 1026.70   63.29
   0   5   3 1023.10   44.60
   0   5   3 1049.20   47.80
   0  -6  -3  103.89   31.00
   0  -6  -3  147.79   31.00
   0  -6  -3  119.59   27.80
   0  -6  -3   81.69   16.30
   0  -6  -3  128.09   22.40
   0  -6  -3  116.09   26.50
   0   6   3  142.09   47.40
   0   6   3  106.39   24.00
   0   6   3   68.89   27.70
   0   6   3  101.49   29.90
   0   6   3   85.19   29.30
   0   6   3   88.19   28.00
   0   6   3  129.39   25.20
   1   6  -3   79.89   21.40
   1   6  -3   57.79   26.40
   1   6  -3   73.79   24.00
   1   6  -3   28.10   22.50
   1   6  -3   57.59   32.70
   1   6  -3   52.39   18.40
   1   6  -3   21.90   24.40
  -1  -6   3   65.49   23.90
  -1  -6   3   85.19   23.30
  -1  -6   3   48.10   19.20
  -1  -6   3   72.89   25.30
  -1  -6   3   73.79   21.40
   1   5  -3  404.46   33.40
   1   5  -3  354.86   34.70
   1   5  -3  387.36   28.60
   1   5  -3  399.96   54.39
   1   5  -3  389.16   30.30
   1   5  -3  352.26   33.00
   1   5  -3  425.16   61.79
  -1  -5   3  377.06   35.80
  -1  -5   3  414.96   31.60
  -1  -5   3  376.86   29.00
  -1  -5   3  420.76   66.19
  -1  -5   3  425.46   34.80
   1   4  -3   12.10   13.30
   1   4  -3   17.80   12.90
   1   4  -3    9.40   16.00
   1   4  -3   15.40   15.50
   1   4  -3   -2.40   15.60
   1   4  -3   -7.40   24.40
   1   4  -3   31.80   18.60
  -1  -4   3   32.50   20.10
  -1  -4   3   24.10   13.90
  -1  -4   3   22.60   13.40
  -1  -4   3    6.90   16.60
   1   3  -3 3734.93  103.99
   1   3  -3 3967.00  119.79
   1   3  -3 3749.52  108.89
   1   3  -3 3788.32  105.59
   1   3  -3 3714.23  103.59
   1   3  -3 3878.31  105.89
  -1  -3   3 3686.43  105.49
  -1  -3   3 3775.42  105.79
  -1  -3   3 3784.12  103.99
  -1  -3   3 3899.41  109.19
   1   2  -3 1824.82   49.80
   1   2  -3 1790.92   49.60
   1   2  -3 1705.73   51.09
   1   2  -3 1827.62   63.69
   1   2  -3 1766.82   50.19
   1   2  -3 1749.12   51.69
   1   2  -3 1872.51   56.09
  -1  -2   3 1797.02   49.99
  -1  -2   3 1756.92   58.49
  -1  -2   3 1721.93   51.89
   1   0  -3 1350.76   38.80
   1   0  -3 1385.26   38.00
   1   0  -3 1360.76   42.10
   1   0  -3 1379.26   38.20
   1   0  -3 1366.26   38.70
  -1   0   3 1404.36   38.10
  -1   0   3 1372.16   41.50
  -1   0   3 1363.96   38.40
   1  -1  -3 4201.48  117.39
  -1   1   3 4393.76  117.59
  -1   1   3 4331.97  116.79
   1  -2  -3 1789.02   58.59
   1  -2  -3 1732.43   54.49
   1  -2  -3 1829.42   55.29
  -1   2   3 1756.12   57.59
  -1   2   3 1798.12   54.29
  -1   2   3 1766.52   57.09
  -1   2   3 1917.41   57.79
  -1   2   3 1763.02   57.79
   1  -3  -3 3444.86  106.09
   1  -3  -3 3586.04  108.89
   1  -3  -3 3680.83  109.19
   1  -3  -3 3808.92  109.69
   1  -3  -3 3782.32  107.69
   1  -3  -3 3854.01  109.79
  -1   3   3 3815.62  109.09
  -1   3   3 3899.71  115.59
  -1   3   3 3719.43  106.09
  -1   3   3 3858.11  106.29
  -1   3   3 3764.62  108.79
  -1   3   3 3698.43  107.09
  -1   3   3 3516.55  108.09
   1  -4  -3   15.80   17.10
   1  -4  -3   26.30   21.50
   1  -4  -3   -5.30   22.30
   1  -4  -3    1.80   19.00
   1  -4  -3   -9.80   21.50
   1  -4  -3   14.20   18.50
  -1   4   3   -8.80   17.20
  -1   4   3    7.60   20.70
  -1   4   3   -8.40   15.70
  -1   4   3   23.20   18.60
  -1   4   3   -9.90   20.40
  -1   4   3   21.50   21.00
  -1   4   3   13.10   21.30
   1  -5  -3  397.56   38.50
   1  -5  -3  406.96   36.70
   1  -5  -3  409.86   42.70
   1  -5  -3  343.87   39.80
   1  -5  -3  325.77   27.10
  -1   5   3  457.65   35.40
  -1   5   3  360.46   40.60
  -1   5   3  351.06   35.20
  -1   5   3  429.86   53.59
  -1   5   3  335.07   41.40
  -1   5   3  396.46   41.20
  -1   5   3  424.96   38.40
   1  -6  -3   93.99   27.20
   1  -6  -3   56.99   24.20
   1  -6  -3   44.10   17.10
   1  -6  -3   11.30   19.60
   1  -6  -3  130.89   30.10
  -1   6   3   79.29   28.40
  -1   6   3   76.39   23.00
  -1   6   3   46.20   25.80
  -1   6   3   75.09   26.10
  -1   6   3   62.89   22.90
  -1   6   3   40.30   28.30
  -1   6   3   47.30   28.30
   2   6  -3  300.77   55.19
   2   6  -3  241.38   28.60
   2   6  -3  242.58   34.10
   2   6  -3  181.98   27.00
   2   6  -3  264.57   39.10
   2   6  -3  203.58   29.20
  -2  -6   3  252.37   34.60
  -2  -6   3  243.18   28.80
  -2  -6   3  265.77   34.10
  -2  -6   3  257.77   39.10
  -2  -6   3  228.78   29.70
   2   5  -3  268.67   33.50
   2   5  -3  271.07   29.70
   2   5  -3  268.77   34.70
   2   5  -3  323.37   36.90
   2   5  -3  292.27   28.70
   2   5  -3  326.47   51.09
   2   5  -3  303.07   27.20
  -2  -5   3  286.97   27.20
  -2  -5   3  314.07   33.30
  -2  -5   3  282.27   37.40
  -2  -5   3  301.97   30.90
  -2  -5   3  309.67   34.60
   2   4  -3  103.69   19.50
   2   4  -3   87.19   17.40
   2   4  -3   98.69   15.50
   2   4  -3   71.89   26.70
   2   4  -3   93.99   14.70
   2   4  -3  107.19   18.90
   2   4  -3  124.49   20.70
  -2  -4   3   88.09   15.90
  -2  -4   3   82.69   18.00
  -2  -4   3   83.89   18.50
  -2  -4   3   80.29   14.90
  -2  -4   3  132.89   21.90
   2   3  -3 1634.94   52.49
   2   3  -3 1666.83   50.59
   2   3  -3 1726.73   54.99
   2   3  -3 1595.14   52.89
   2   3  -3 1682.53   66.59
   2   3  -3 1729.63   49.99
  -2  -3   3 1629.84   52.29
  -2  -3   3 1678.83   50.79
  -2  -3   3 1676.03   53.09
  -2  -3   3 1637.64   50.29
  -2  -3   3 1675.93   55.39
   2  -3  -3 1607.44   55.69
   2  -3  -3 1571.04   57.09
   2  -3  -3 1657.33   54.69
   2  -3  -3 1671.33   54.29
   2  -3  -3 1704.73   56.99
   2  -3  -3 1612.54   57.39
  -2   3   3 1651.93   54.59
  -2   3   3 1603.44   56.69
  -2   3   3 1596.64   52.49
  -2   3   3 1598.24   56.59
  -2   3   3 1666.93   57.99
  -2   3   3 1626.44   64.59
  -2   3   3 1587.64   54.19
   2  -4  -3   89.39   20.20
   2  -4  -3   89.99   17.60
   2  -4  -3  100.59   19.00
   2  -4  -3   63.39   23.70
   2  -4  -3   97.09   23.50
   2  -4  -3   82.19   24.10
   2  -4  -3   54.09   20.20
  -2   4   3   49.10   18.90
  -2   4   3   76.39   22.80
  -2   4   3  120.09   20.20
  -2   4   3   87.09   20.30
  -2   4   3   69.99   23.30
  -2   4   3   74.89   22.80
  -2   4   3   84.39   22.90
   2  -5  -3  330.07   42.40
   2  -5  -3  281.07   40.60
   2  -5  -3  258.47   26.50
   2  -5  -3  256.27   39.00
   2  -5  -3  287.37   38.40
   2  -5  -3  287.77   34.10
  -2   5   3  305.07   34.30
  -2   5   3  275.57   34.10
  -2   5   3  223.38   29.50
  -2   5   3  296.27   50.69
  -2   5   3  317.47   40.70
  -2   5   3  196.48   28.80
  -2   5   3  299.07   33.10
   2  -6  -3  183.88   24.50
   2  -6  -3  211.28   30.10
   2  -6  -3  281.57   42.70
   2  -6  -3  286.57   36.20
  -2   6   3  194.18   31.70
  -2   6   3  163.88   25.50
  -2   6   3  171.58   34.80
  -2   6   3  177.08   28.60
  -2   6   3  183.78   26.20
  -2   6   3  293.67   43.20
  -2   6   3  238.38   33.90
   3   6  -3 1280.77   76.79
   3   6  -3 1299.17   57.99
   3   6  -3 1192.78   55.09
   3   6  -3 1279.87   57.99
   3   6  -3 1193.38   49.40
   3   6  -3 1286.17   51.49
   3   6  -3 1201.88   56.19
  -3  -6   3 1271.77   55.29
  -3  -6   3 1280.27   55.69
  -3  -6   3 1098.69   47.20
  -3  -6   3 1259.67   53.89
  -3  -6   3 1324.07   59.49
   3   5  -3 1022.30   46.70
   3   5  -3 1084.79   49.70
   3   5  -3  989.60   49.40
   3   5  -3 1013.30   43.20
   3   5  -3 1021.00   42.10
   3   5  -3 1021.40   49.30
   3   5  -3 1088.29   66.89
  -3  -5   3 1000.80   47.60
  -3  -5   3 1039.40   47.60
  -3  -5   3 1056.69   45.00
  -3  -5   3 1037.10   50.39
   3   4  -3  346.37   29.20
   3   4  -3  380.86   31.20
   3   4  -3  310.17   32.70
   3   4  -3  366.16   25.70
   3   4  -3  304.77   43.90
   3   4  -3  339.07   30.80
   3   4  -3  347.77   23.00
  -3  -4   3  351.76   27.80
  -3  -4   3  354.06   30.90
  -3  -4   3  387.16   31.00
  -3  -4   3  357.06   29.20
   3   3  -3  729.03   28.70
   3   3  -3  721.43   28.00
   3   3  -3  754.12   44.90
   3   3  -3  789.82   32.40
   3   3  -3  727.53   32.10
   3   3  -3  734.53   33.30
  -3  -3   3  666.43   31.50
  -3  -3   3  706.03   29.30
  -3  -3   3  772.92   48.10
  -3  -3   3  723.53   31.60
  -3  -3   3  735.83   32.70
  -3  -3   3  618.14   27.10
   3   2  -3 3558.34   96.49
   3   2  -3 3477.15   95.29
   3   2  -3 3614.24  105.59
   3   2  -3 3327.87   91.39
   3   2  -3 3631.34   94.29
  -3  -2   3 3318.87   94.29
  -3  -2   3 3489.75   95.89
  -3  -2   3 3448.65  106.09
  -3  -2   3 3340.07   93.99
  -3  -2   3 3466.65   95.49
  -3  -2   3 3393.96   95.49
   3   0  -3  723.63   23.40
   3   0  -3  836.42   31.40
   3   0  -3  760.62   26.20
   3   0  -3  792.42   26.00
   3   0  -3  792.22   25.80
   3   0  -3  872.91   28.60
   3   0  -3  808.52   27.00
  -3   0   3  885.51   28.50
  -3   0   3  810.92   30.80
  -3   0   3  789.82   25.90
  -3   0   3  798.12   26.00
  -3   0   3  784.22   26.10
  -3   0   3  759.92   26.40
  -3   0   3  714.43   23.40
   3  -2  -3 3460.65   95.79
   3  -2  -3 3432.56   98.09
   3  -2  -3 3399.46   95.09
   3  -2  -3 3425.76   97.99
   3  -2  -3 3405.86   97.89
   3  -2  -3 3226.68   95.59
  -3   2   3 3348.26  100.69
  -3   2   3 3376.96   98.69
  -3   2   3 3403.56   96.59
  -3   2   3 3483.95   95.99
  -3   2   3 3271.67   95.39
  -3   2   3 3431.96   97.49
   3  -3  -3  735.73   33.80
   3  -3  -3  684.63   36.80
   3  -3  -3  699.93   37.50
   3  -3  -3  774.32   37.60
   3  -3  -3  778.92   33.30
   3  -3  -3  540.85   50.39
  -3   3   3  675.13   45.30
  -3   3   3  712.03   32.20
  -3   3   3  698.23   40.80
  -3   3   3  732.83   37.60
  -3   3   3  744.33   33.70
  -3   3   3  705.13   34.50
  -3   3   3  709.83   36.60
  -3   3   3  718.73   36.10
   3  -4  -3  317.37   28.40
   3  -4  -3  324.47   34.40
   3  -4  -3  375.46   36.20
   3  -4  -3  319.37   35.90
   3  -4  -3  310.37   29.80
   3  -4  -3  322.17   31.80
   3  -4  -3  313.27   28.90
  -3   4   3  338.57   45.90
  -3   4   3  359.16   40.70
  -3   4   3  386.96   34.40
  -3   4   3  323.67   30.20
  -3   4   3  332.27   34.70
  -3   4   3  329.67   32.00
  -3   4   3  374.56   29.80
  -3   4   3  392.76   36.60
   3  -5  -3  977.00   54.79
   3  -5  -3 1060.79   48.00
   3  -5  -3  977.10   53.79
   3  -5  -3 1005.70   43.70
   3  -5  -3 1000.60   50.29
   3  -5  -3  989.80   49.60
  -3   5   3 1023.60   62.89
  -3   5   3 1036.30   55.19
  -3   5   3 1025.30   52.19
  -3   5   3 1048.60   66.99
  -3   5   3 1032.30   47.40
  -3   5   3 1022.70   49.70
  -3   5   3  967.10   52.49
  -3   5   3 1052.19   46.10
   3  -6  -3 1303.87   55.89
   3  -6  -3 1279.87   62.69
   3  -6  -3 1111.89   61.79
   3  -6  -3 1184.18   47.90
   3  -6  -3 1361.16   58.59
  -3   6   3 1206.58   59.89
  -3   6   3 1142.19   63.79
  -3   6   3 1192.28   62.69
  -3   6   3 1250.37   72.09
  -3   6   3 1247.88   54.59
  -3   6   3 1199.08   55.79
  -3   6   3 1211.78   51.59
  -3   6   3 1168.18   76.19
   4   6  -3   49.70   25.90
   4   6  -3   66.29   19.70
   4   6  -3   55.99   33.60
   4   6  -3   34.90   23.30
   4   6  -3   68.59   20.90
   4   6  -3   41.00   25.00
   4   6  -3   68.39   24.20
  -4  -6   3   47.90   17.90
  -4  -6   3   63.19   24.50
  -4  -6   3   63.99   26.40
  -4  -6   3   66.49   24.10
   4   5  -3  141.69   25.80
   4   5  -3  152.48   20.70
   4   5  -3  177.48   34.70
   4   5  -3  173.48   26.40
   4   5  -3  132.39   23.60
   4   5  -3  171.28   24.50
   4   5  -3  196.98   25.10
  -4  -5   3  138.09   24.20
  -4  -5   3  158.18   24.20
  -4  -5   3  155.28   24.80
  -4  -5   3  162.48   22.90
   4   4  -3  968.20   36.90
   4   4  -3  921.11   56.29
   4   4  -3  909.21   37.40
   4   4  -3  911.01   40.60
   4   4  -3  898.21   42.60
   4   4  -3  894.71   41.50
   4   4  -3  894.71   45.70
  -4  -4   3  890.81   42.20
  -4  -4   3  874.41   60.19
  -4  -4   3  900.91   40.80
  -4  -4   3  927.01   39.10
  -4  -4   3  929.61   41.40
   4   3  -3 1765.32   54.19
   4   3  -3 1776.32   54.39
   4   3  -3 1709.03   56.79
   4   3  -3 1840.92   55.79
  -4  -3   3 1771.02   54.79
  -4  -3   3 1751.42   71.39
  -4  -3   3 1715.93   56.69
  -4  -3   3 1891.11   57.19
  -4  -3   3 1810.32   56.89
   4   2  -3  494.85   28.70
   4   2  -3  509.75   20.10
   4   2  -3  534.85   27.60
   4   2  -3  528.35   25.20
   4   2  -3  607.04   38.20
   4   2  -3  593.34   23.60
   4   2  -3  561.74   23.40
  -4  -2   3  551.74   25.20
  -4  -2   3  558.14   40.20
  -4  -2   3  516.85   24.60
  -4  -2   3  544.95   27.40
  -4  -2   3  539.55   26.00
  -4  -1   3 3842.92  103.09
  -4  -1   3 3738.33  103.69
   4   0  -3  577.64   22.70
   4   0  -3  596.14   23.20
   4   0  -3  574.74   26.10
   4   0  -3  577.64   23.20
   4   0  -3  571.24   19.20
   4   0  -3  625.44   28.30
  -4   0   3  635.04   26.80
  -4   0   3  554.04   31.70
  -4   0   3  591.54   23.00
  -4   0   3  569.64   23.30
  -4   0   3  560.74   22.60
  -4   0   3  515.25   19.20
  -4   0   3  610.84   23.30
   4  -1  -3 3557.64  100.39
   4  -1  -3 3651.53  100.09
   4  -1  -3 3484.25   99.49
   4  -1  -3 3494.55   99.69
   4  -1  -3 3807.92  101.39
   4  -1  -3 3630.04   99.19
  -4   1   3 3628.94   99.59
  -4   1   3 3482.05  103.89
  -4   1   3 3627.04  100.19
  -4   1   3 3801.02  102.79
  -4   1   3 3602.24   99.99
   4  -2  -3  588.34   33.60
   4  -2  -3  441.06   30.90
   4  -2  -3  581.24   28.90
   4  -2  -3  547.75   28.60
   4  -2  -3  541.75   32.50
   4  -2  -3  496.95   31.30
   4  -2  -3  556.14   27.50
  -4   2   3  581.34   37.40
  -4   2   3  566.44   29.90
  -4   2   3  559.94   28.30
  -4   2   3  574.04   33.10
  -4   2   3  561.44   31.40
  -4   2   3  640.14   31.60
  -4   2   3  517.45   33.00
   4  -3  -3 1849.21   56.59
   4  -3  -3 1722.53   60.99
   4  -3  -3 1822.32   59.29
   4  -3  -3 1680.83   61.89
   4  -3  -3 2001.20   61.79
   4  -3  -3 1717.43   61.59
   4  -3  -3 1747.63   57.89
  -4   3   3 1766.82   58.89
  -4   3   3 1735.23   62.69
  -4   3   3 1776.32   65.49
  -4   3   3 1776.72   59.99
  -4   3   3 1794.12   62.39
  -4   3   3 1786.12   55.49
  -4   3   3 1752.32   58.69
   4  -4  -3  846.32   46.10
   4  -4  -3  878.31   45.80
   4  -4  -3  921.91   42.50
   4  -4  -3  849.22   42.90
   4  -4  -3  867.71   38.80
   4  -4  -3  854.31   40.90
   4  -4  -3  908.01   38.30
  -4   4   3  876.11   43.60
  -4   4   3  842.52   46.50
  -4   4   3  876.71   44.70
  -4   4   3  923.01   37.80
  -4   4   3  869.71   41.50
  -4   4   3  880.61   44.30
  -4   4   3  923.01   57.39
  -4   4   3  919.51   53.09
   4  -5  -3  210.58   27.40
   4  -5  -3  166.48   28.90
   4  -5  -3  194.78   26.80
   4  -5  -3  161.58   29.60
   4  -5  -3  197.08   30.40
   4  -5  -3  180.48   28.50
  -4   5   3  179.08   29.10
  -4   5   3  152.18   28.20
  -4   5   3  166.68   25.30
  -4   5   3  103.89   29.50
  -4   5   3  193.88   31.40
  -4   5   3  146.39   25.30
  -4   5   3  175.08   37.30
  -4   5   3  179.68   28.40
   4  -6  -3   68.79   25.60
   4  -6  -3   79.69   27.50
   4  -6  -3   94.99   30.00
   4  -6  -3   67.69   29.90
   4  -6  -3   68.99   21.40
   4  -6  -3   65.29   30.70
  -4   6   3   67.29   24.00
  -4   6   3   55.39   23.60
  -4   6   3   76.49   29.10
  -4   6   3   57.69   31.10
  -4   6   3   17.20   27.50
  -4   6   3  146.69   45.50
  -4   6   3   44.40   22.30
  -4   6   3  104.19   30.30
   5   6  -3   73.59   21.30
   5   6  -3  105.79   34.40
   5   6  -3   65.19   20.70
   5   6  -3   78.39   27.90
   5   6  -3   55.19   40.20
   5   6  -3   62.19   26.70
  -5  -6   3  129.19   36.40
  -5  -6   3   94.39   26.40
  -5  -6   3   76.09   24.20
  -5  -6   3  130.09   27.90
   5   5  -3  312.77   34.80
   5   5  -3  364.36   39.00
   5   5  -3  322.17   30.70
   5   5  -3  357.46   33.50
   5   5  -3  340.97   34.20
   5   5  -3  325.27   51.59
   5   5  -3  355.96   41.30
  -5  -5   3  433.76   48.80
  -5  -5   3  338.07   36.50
  -5  -5   3  384.26   35.60
  -5  -5   3  363.56   37.10
  -5  -5   3  385.36   58.39
   5   4  -3 1433.56   59.99
   5   4  -3 1489.85   57.19
   5   4  -3 1506.35   50.89
   5   4  -3 1532.65   70.09
   5   4  -3 1565.94   51.49
   5   4  -3 1424.46   56.69
   5   4  -3 1446.46   52.79
  -5  -4   3 1509.15   52.29
  -5  -4   3 1443.06   54.49
  -5  -4   3 1462.45   73.99
  -5  -4   3 1462.75   54.89
  -5  -4   3 1409.66   54.19
   5   3  -3  574.04   26.40
   5   3  -3  582.04   33.00
   5   3  -3  593.74   28.20
   5   3  -3  608.44   42.20
  -5  -3   3  569.64   31.60
  -5  -3   3  556.04   45.40
  -5  -3   3  559.64   29.50
  -5  -3   3  617.34   29.00
  -5  -3   3  567.94   29.30
   5   2  -3 3612.14  101.29
   5   2  -3 3980.80  111.09
   5   2  -3 3687.93  105.59
   5   2  -3 3578.14  102.79
   5   2  -3 3913.01  113.59
   5   2  -3 3857.51  103.59
   5   2  -3 3813.52  105.39
  -5  -2   3 3432.36  103.29
  -5  -2   3 3834.72  104.69
  -5  -2   3 3769.32  105.69
  -5  -2   3 3791.92  104.59
  -5  -2   3 3631.84  114.29
  -5  -2   3 3622.34  102.09
   5   1  -3 5127.99  139.49
   5   1  -3 5136.89  143.19
  -5  -1   3 5245.58  143.69
  -5  -1   3 5054.59  139.09
   5   0  -3 3483.95   91.89
   5   0  -3 3278.77   91.69
   5   0  -3 3427.86   91.99
   5   0  -3 3169.48   93.69
  -5   0   3 3390.66   95.19
  -5   0   3 3347.36   91.69
  -5   0   3 3538.85   91.89
  -5   0   3 3361.36  100.39
  -5   0   3 3206.38   89.29
  -5   0   3 2768.92  105.39
  -5   0   3 3427.36   92.09
   5  -1  -3 5126.49  137.39
   5  -1  -3 4736.33  136.09
   5  -1  -3 4921.01  133.69
   5  -1  -3 4656.73  133.69
  -5   1   3 4882.31  133.69
  -5   1   3 4967.90  134.09
  -5   1   3 4938.01  133.59
  -5   1   3 4972.20  136.69
   5  -2  -3 3859.91  103.39
   5  -2  -3 3735.43  107.69
   5  -2  -3 3730.93  104.09
   5  -2  -3 3642.24  106.19
   5  -2  -3 3765.22  106.69
   5  -2  -3 3661.83  106.59
   5  -2  -3 3553.64  118.09
  -5   2   3 3783.72  107.19
  -5   2   3 3676.93  109.39
  -5   2   3 3604.14  105.09
  -5   2   3 3683.93  105.19
  -5   2   3 3777.02  105.49
  -5   2   3 3514.85  105.09
   5  -3  -3  567.34   34.90
   5  -3  -3  531.45   35.20
   5  -3  -3  587.74   30.50
   5  -3  -3  537.55   35.10
   5  -3  -3  582.84   29.10
   5  -3  -3  593.74   34.10
   5  -3  -3  568.04   32.10
  -5   3   3  587.44   37.20
  -5   3   3  608.44   33.50
  -5   3   3  578.14   33.50
  -5   3   3  559.24   40.20
  -5   3   3  579.74   33.10
  -5   3   3  601.64   37.30
   5  -4  -3 1407.86   60.19
   5  -4  -3 1411.66   55.49
   5  -4  -3 1465.95   50.29
   5  -4  -3 1434.16   58.79
   5  -4  -3 1482.15   54.29
   5  -4  -3 1473.05   55.59
   5  -4  -3 1510.65   59.19
  -5   4   3 1489.05   56.19
  -5   4   3 1405.46   56.89
  -5   4   3 1492.15   55.09
  -5   4   3 1465.55   65.79
  -5   4   3 1467.75   57.09
  -5   4   3 1418.96   60.59
   5  -5  -3  341.47   33.50
   5  -5  -3  318.47   40.10
   5  -5  -3  303.17   37.20
   5  -5  -3  330.97   42.00
   5  -5  -3  356.86   41.80
   5  -5  -3  330.57   31.60
  -5   5   3  335.97   56.69
  -5   5   3  371.16   43.50
  -5   5   3  322.57   36.10
  -5   5   3  352.06   40.50
  -5   5   3  335.37   37.70
  -5   5   3  372.96   50.09
  -5   5   3  282.87   38.20
   5  -6  -3   76.09   24.70
   5  -6  -3   89.79   55.69
   5  -6  -3  125.19   48.40
   5  -6  -3   89.79   24.00
   5  -6  -3   77.89   31.00
   5  -6  -3   91.19   27.80
  -5   6   3   73.49   34.80
  -5   6   3   37.40   27.90
  -5   6   3  104.89   33.30
  -5   6   3  126.39   26.60
  -5   6   3   83.89   26.10
  -5   6   3  141.19   41.30
  -5   6   3   83.49   35.50
   6   6  -3   77.79   28.90
   6   6  -3  109.49   23.40
   6   6  -3  133.29   44.20
   6   6  -3  116.89   23.20
  -6  -6   3  134.19   28.60
  -6  -6   3  144.49   35.70
  -6  -6   3  144.29   26.60
   6   5  -3  145.99   31.20
   6   5  -3  226.48   32.30
   6   5  -3  173.38   22.40
   6   5  -3  194.68   27.70
   6   5  -3  188.88   28.90
   6   5  -3  174.78   22.70
  -6  -5   3  185.78   25.70
  -6  -5   3  199.68   24.00
  -6  -5   3  184.68   26.40
  -6  -5   3  198.08   27.40
  -6  -5   3  228.68   32.30
  -6  -5   3  126.99   33.70
   6   4  -3   54.99   33.90
   6   4  -3   47.20   23.80
   6   4  -3   72.69   17.90
  -6  -4   3   45.30   34.90
  -6  -4   3   64.89   18.40
  -6  -4   3   78.79   19.70
  -6  -4   3   42.40   23.50
  -6  -4   3   44.30   20.80
   6   3  -3 1000.10   39.00
   6   3  -3 1082.29   44.90
   6   3  -3  995.60   32.50
   6   3  -3 1054.29   39.70
   6   3  -3 1069.79   42.70
   6   3  -3 1126.49   53.59
  -6  -3   3 1061.89   40.30
  -6  -3   3 1007.90   56.69
  -6  -3   3 1052.79   42.10
  -6  -3   3 1047.80   42.20
  -6  -3   3 1047.60   39.30
  -6  -3   3 1050.39   38.70
   6   2  -3  433.86   24.90
   6   2  -3  406.96   29.40
   6   2  -3  485.25   36.20
   6   2  -3  423.66   27.60
   6   2  -3  441.46   23.60
   6   2  -3  394.86   21.80
   6   2  -3  429.66   32.90
  -6  -2   3  426.16   38.50
  -6  -2   3  423.36   25.60
  -6  -2   3  425.96   27.00
  -6  -2   3  460.15   24.80
  -6  -2   3  397.66   21.40
  -6  -2   3  406.66   28.00
   6   1  -3 4183.38  121.49
   6   1  -3 4563.94  128.19
   6   1  -3 4381.26  120.69
   6   1  -3 4417.36  125.49
   6   1  -3 4225.48  121.69
   6   1  -3 4546.04  120.89
   6   1  -3 4576.04  122.09
  -6  -1   3 4339.47  120.79
  -6  -1   3 4363.56  128.69
  -6  -1   3 4470.25  126.59
  -6  -1   3 4333.87  121.39
  -6  -1   3 4306.67  120.59
  -6  -1   3 4358.76  121.59
   6   0  -3 3151.18   91.89
   6   0  -3 3218.98   91.89
   6   0  -3 3347.96   95.39
   6   0  -3 3094.99   94.09
   6   0  -3 3412.96   92.39
   6   0  -3 3190.68   91.69
  -6   0   3 3085.89   91.19
  -6   0   3 3366.16   96.09
  -6   0   3 3328.17   92.49
  -6   0   3 3306.17   92.39
  -6   0   3 3282.97   89.39
  -6   0   3 3252.27   94.69
  -6   0   3 3269.27   98.19
   6  -1  -3 4263.07  118.59
   6  -1  -3 4289.87  119.59
   6  -1  -3 4254.37  130.19
   6  -1  -3 4235.98  118.59
   6  -1  -3 4101.19  121.89
   6  -1  -3 4213.68  118.89
   6  -1  -3 4550.34  123.89
  -6   1   3 4289.27  118.99
  -6   1   3 4213.28  119.49
  -6   1   3 4406.26  119.29
  -6   1   3 4208.08  118.79
  -6   1   3 4360.16  119.79
  -6   1   3 4246.38  122.59
   6  -2  -3  471.75   31.10
   6  -2  -3  383.66   29.20
   6  -2  -3  359.56   38.40
   6  -2  -3  406.96   27.80
   6  -2  -3  371.76   31.00
   6  -2  -3  430.66   36.30
   6  -2  -3  428.46   27.30
   6  -2  -3  393.16   25.10
  -6   2   3  346.17   31.00
  -6   2   3  415.56   25.90
  -6   2   3  420.86   29.30
  -6   2   3  404.86   27.70
  -6   2   3  406.16   34.20
  -6   2   3  420.76   29.00
   6  -3  -3 1015.60   45.50
   6  -3  -3 1091.49   39.90
   6  -3  -3 1053.89   43.10
   6  -3  -3 1049.49   44.70
   6  -3  -3 1082.69   42.40
   6  -3  -3 1010.80   44.50
   6  -3  -3  998.90   39.70
  -6   3   3 1009.10   46.30
  -6   3   3 1023.30   42.80
  -6   3   3  976.80   40.90
  -6   3   3  978.60   40.00
  -6   3   3  959.60   48.10
  -6   3   3 1042.10   43.20
   6  -4  -3   52.19   15.70
   6  -4  -3   52.99   20.50
   6  -4  -3   48.90   23.80
   6  -4  -3   54.39   21.80
   6  -4  -3   56.39   23.50
   6  -4  -3  -11.00   33.60
  -6   4   3   79.49   21.60
  -6   4   3   73.69   23.20
  -6   4   3   72.79   23.00
  -6   4   3   70.39   35.10
  -6   4   3   29.20   33.80
   6  -5  -3  223.98   34.50
   6  -5  -3  125.09   27.60
   6  -5  -3  225.88   27.60
   6  -5  -3  242.48   29.70
   6  -5  -3  208.98   31.40
   6  -5  -3  202.08   27.70
  -6   5   3  190.48   28.60
  -6   5   3  152.38   26.20
  -6   5   3  136.29   32.10
  -6   5   3  153.98   27.70
  -6   5   3  189.18   30.30
  -6   5   3  180.18   39.60
  -6   5   3  211.48   27.50
   6  -6  -3   99.59   35.20
   6  -6  -3  116.49   28.80
   6  -6  -3  138.59   50.39
   6  -6  -3  253.17   61.19
   6  -6  -3  146.39   32.20
   6  -6  -3  114.09   25.00
  -6   6   3  232.98   69.99
  -6   6   3   77.69   33.10
  -6   6   3   82.09   29.10
  -6   6   3  180.88   41.90
  -6   6   3  100.19   26.50
  -6   6   3  105.19   26.30
   7   6  -3  305.67   44.90
   7   6  -3  321.97   40.20
   7   6  -3  346.67   45.70
   7   6  -3  411.86   47.20
   7   6  -3  304.07   37.00
   7   6  -3  238.98   32.80
  -7  -6   3  418.96   66.09
  -7  -6   3  332.57   35.50
  -7  -6   3  341.67   42.40
  -7  -6   3  337.77   37.20
  -7  -6   3  448.76   43.00
  -7  -6   3  378.56   37.80
   7   5  -3   21.10   19.60
   7   5  -3    1.10   28.10
   7   5  -3   29.10   19.20
   7   5  -3   23.20   27.10
  -7  -5   3   42.90   21.10
  -7  -5   3   44.70   22.90
  -7  -5   3   26.10   23.40
  -7  -5   3   17.10   20.60
  -7  -5   3   12.30   22.00
  -7  -5   3   15.60   64.89
   7   4  -3  205.28   26.90
   7   4  -3  207.28   29.30
   7   4  -3  261.17   34.40
   7   4  -3  238.18   43.90
   7   4  -3  256.57   28.70
  -7  -4   3  213.38   28.30
  -7  -4   3  254.07   31.60
  -7  -4   3  256.87   29.50
  -7  -4   3  237.88   32.30
  -7  -4   3  241.08   26.20
  -7  -4   3  217.98   37.50
   7   3  -3 1048.50   44.50
   7   3  -3 1001.00   49.70
   7   3  -3 1037.70   53.09
   7   3  -3  946.21   45.70
   7   3  -3 1100.29   44.00
   7   3  -3  951.60   33.70
   7   3  -3  957.70   38.50
  -7  -3   3  987.60   42.40
  -7  -3   3  982.30   38.00
  -7  -3   3  840.42   56.79
  -7  -3   3  970.80   38.90
  -7  -3   3  967.70   41.70
   7   2  -3  175.68   26.00
   7   2  -3  199.68   20.80
   7   2  -3  156.28   19.60
   7   2  -3  176.58   25.50
   7   2  -3  188.48   23.20
   7   2  -3  175.28   32.20
   7   2  -3  167.68   24.70
  -7  -2   3  154.38   25.10
  -7  -2   3  174.68   19.30
  -7  -2   3  185.98   17.60
  -7  -2   3  158.38   19.30
  -7  -2   3  152.68   21.20
  -7  -2   3  167.68   24.30
   7   1  -3  554.24   34.90
   7   1  -3  630.34   35.00
   7   1  -3  609.94   38.30
   7   1  -3  592.04   31.30
   7   1  -3  568.84   28.90
   7   1  -3  574.44   31.20
   7   1  -3  493.65   30.00
  -7  -1   3  600.34   40.40
  -7  -1   3  602.64   51.89
  -7  -1   3  604.04   29.50
  -7  -1   3  533.35   30.80
  -7  -1   3  536.35   30.70
  -7  -1   3  555.24   37.90
   7   0  -3   22.30   14.40
   7   0  -3   47.80   16.00
   7   0  -3   14.30   16.10
   7   0  -3   47.10   15.90
   7   0  -3   24.40   20.90
   7   0  -3   39.30   19.30
  -7   0   3   52.39   16.50
  -7   0   3   41.60   19.60
  -7   0   3   37.90   16.40
  -7   0   3   33.90   12.90
  -7   0   3   14.90   15.30
  -7   0   3   54.69   17.00
  -7   0   3   38.30   22.80
   7  -1  -3  563.24   35.80
   7  -1  -3  538.55   28.40
   7  -1  -3  553.14   34.40
   7  -1  -3  582.54   31.60
   7  -1  -3  557.94   31.40
   7  -1  -3  533.65   28.40
   7  -1  -3  572.14   29.50
  -7   1   3  539.15   30.50
  -7   1   3  528.45   34.60
  -7   1   3  561.14   29.10
  -7   1   3  572.74   30.70
  -7   1   3  550.04   32.00
  -7   1   3  634.24   31.20
   7  -2  -3  111.79   18.60
   7  -2  -3  157.58   19.10
   7  -2  -3  184.18   23.50
   7  -2  -3  167.88   24.90
   7  -2  -3  143.09   18.20
   7  -2  -3  221.78   30.70
   7  -2  -3  166.38   21.90
   7  -2  -3  220.48   22.20
  -7   2   3  170.18   21.30
  -7   2   3  160.28   24.60
  -7   2   3  178.88   22.70
  -7   2   3  135.19   19.90
  -7   2   3  183.28   20.40
  -7   2   3  146.49   19.70
   7  -3  -3 1009.60   46.20
   7  -3  -3  934.81   39.90
   7  -3  -3  993.40   45.40
   7  -3  -3  993.90   45.30
   7  -3  -3  991.20   37.60
   7  -3  -3 1016.00   42.60
   7  -3  -3 1003.90   43.10
  -7   3   3  973.20   50.09
  -7   3   3  971.10   47.50
  -7   3   3  973.70   41.30
  -7   3   3  988.80   44.00
  -7   3   3  921.21   40.20
  -7   3   3  959.30   42.80
   7  -4  -3  247.18   33.40
   7  -4  -3  219.78   23.50
   7  -4  -3  258.77   32.90
   7  -4  -3  248.28   34.70
   7  -4  -3  290.77   37.70
   7  -4  -3  220.68   35.30
  -7   4   3  267.27   40.20
  -7   4   3  281.37   33.80
  -7   4   3  266.47   36.00
  -7   4   3  234.18   35.30
  -7   4   3  244.78   35.00
  -7   4   3  195.68   36.00
   7  -5  -3    8.80   24.70
   7  -5  -3    8.40   21.90
   7  -5  -3   17.70   21.20
   7  -5  -3    6.80   21.80
   7  -5  -3    9.60   24.80
   7  -5  -3   26.50   34.30
  -7   5   3   23.30   25.30
  -7   5   3   26.80   21.60
  -7   5   3   14.70   23.40
  -7   5   3   31.70   36.60
  -7   5   3   38.90   27.50
   7  -6  -3  295.47   50.79
   7  -6  -3  295.87   43.70
   7  -6  -3  306.07   48.30
   7  -6  -3  337.37   39.00
   7  -6  -3  300.17   39.40
   7  -6  -3  360.36   46.30
  -7   6   3  236.08   49.30
  -7   6   3  183.98   50.79
  -7   6   3  365.86   48.30
  -7   6   3  216.68   34.40
  -7   6   3  474.65   75.09
  -7   6   3  338.47   39.70
  -7   6   3  405.96   48.60
   8   6  -3   83.29   26.60
   8   6  -3  117.89   32.80
   8   6  -3  142.29   30.10
   8   6  -3  116.69   37.90
   8   6  -3   94.69   24.50
   8   6  -3   81.99   30.90
   8   6  -3   76.59   37.30
  -8  -6   3  136.69   28.00
  -8  -6   3   94.59   29.80
  -8  -6   3  150.48   29.40
  -8  -6   3  145.39   28.90
  -8  -6   3  139.59   58.69
  -8  -6   3  116.39   26.40
   8   5  -3   -1.80   28.30
   8   5  -3    6.30   24.90
   8   5  -3  -10.60   19.60
   8   5  -3    1.10   33.40
   8   5  -3   11.10   24.70
   8   5  -3   43.90   27.80
   8   5  -3   11.90   20.30
  -8  -5   3    9.50   23.60
  -8  -5   3    9.00   32.30
  -8  -5   3   -2.40   20.00
  -8  -5   3   44.10   22.20
  -8  -5   3   19.30   22.30
  -8  -5   3   16.10   23.90
   8   4  -3  386.46   48.40
   8   4  -3  404.06   33.10
   8   4  -3  359.76   44.50
   8   4  -3  372.86   32.70
   8   4  -3  378.06   46.30
  -8  -4   3  392.16   32.80
  -8  -4   3  373.06   32.10
  -8  -4   3  384.46   35.30
  -8  -4   3  352.56   37.20
  -8  -4   3  374.36   37.60
  -8  -4   3  358.46   57.09
   8   3  -3  298.27   41.20
   8   3  -3  326.67   28.50
   8   3  -3  331.07   27.60
   8   3  -3  236.78   31.70
   8   3  -3  284.97   37.80
   8   3  -3  266.27   22.60
   8   3  -3  283.67   34.70
  -8  -3   3  296.27   31.20
  -8  -3   3  330.87   25.60
  -8  -3   3  290.77   27.80
  -8  -3   3  307.27   31.70
  -8  -3   3  274.07   46.70
  -8  -3   3  315.27   32.80
   8   2  -3 1663.33   61.29
   8   2  -3 1760.42   65.69
   8   2  -3 1642.84   53.79
   8   2  -3 1706.73   54.59
   8   2  -3 1685.03   54.79
   8   2  -3 1773.72   58.19
   8   2  -3 1602.34   58.19
  -8  -2   3 1584.94   56.19
  -8  -2   3 1670.43   55.29
  -8  -2   3 1550.84   54.39
  -8  -2   3 1646.04   69.09
  -8  -2   3 1365.76   54.59
  -8  -2   3 1721.03   56.89
   8   1  -3  504.75   31.50
   8   1  -3  484.95   37.70
   8   1  -3  446.96   32.90
   8   1  -3  529.15   29.60
   8   1  -3  544.25   29.10
   8   1  -3  469.55   29.90
   8   1  -3  473.45   30.90
  -8  -1   3  496.35   37.60
  -8  -1   3  492.35   30.90
  -8  -1   3  549.65   29.70
  -8  -1   3  544.65   30.80
  -8  -1   3  477.95   31.70
  -8  -1   3  516.85   31.10
  -8  -1   3  552.54   41.20
   8   0  -3  729.93   34.40
   8   0  -3  700.73   36.20
   8   0  -3  707.53   37.60
   8   0  -3  675.43   44.20
   8   0  -3  663.23   34.10
   8   0  -3  703.13   33.40
  -8   0   3  715.13   42.70
  -8   0   3  658.53   34.70
  -8   0   3  694.73   34.60
  -8   0   3  729.53   31.80
  -8   0   3  734.03   39.60
  -8   0   3  659.93   37.60
  -8   0   3  690.83   34.00
  -8   0   3  715.13   34.80
   8  -1  -3  542.15   31.60
   8  -1  -3  471.75   28.00
   8  -1  -3  549.54   31.20
   8  -1  -3  525.35   36.50
   8  -1  -3  518.55   30.80
   8  -1  -3  497.45   33.90
  -8   1   3  545.15   31.30
  -8   1   3  489.35   28.80
  -8   1   3  506.95   28.30
  -8   1   3  482.75   31.90
  -8   1   3  564.24   31.60
  -8   1   3  511.45   35.00
   8  -2  -3 1709.63   56.69
   8  -2  -3 1646.64   55.19
   8  -2  -3 1623.84   57.29
   8  -2  -3 1629.74   57.79
   8  -2  -3 1620.14   53.29
   8  -2  -3 1659.93   56.59
   8  -2  -3 1732.63   64.29
   8  -2  -3 1665.23   60.99
  -8   2   3 1645.64   58.99
  -8   2   3 1625.04   56.49
  -8   2   3 1587.34   61.19
  -8   2   3 1694.43   55.89
  -8   2   3 1616.34   55.49
  -8   2   3 1634.94   57.79
   8  -3  -3  325.77   36.40
   8  -3  -3  286.67   30.90
   8  -3  -3  322.27   32.20
   8  -3  -3  261.97   35.50
   8  -3  -3  294.97   25.30
   8  -3  -3  306.97   35.00
   8  -3  -3  248.18   33.90
  -8   3   3  358.66   36.90
  -8   3   3  322.77   33.20
  -8   3   3  309.97   32.90
  -8   3   3  295.37   34.20
  -8   3   3  320.47   37.90
  -8   3   3  297.67   32.50
   8  -4  -3  372.66   32.10
   8  -4  -3  340.67   39.90
   8  -4  -3  341.47   41.10
   8  -4  -3  371.76   36.60
   8  -4  -3  392.36   38.80
   8  -4  -3  376.06   27.50
   8  -4  -3  404.86   40.10
  -8   4   3  359.06   38.00
  -8   4   3  357.76   36.90
  -8   4   3  347.17   37.80
  -8   4   3  324.57   43.10
  -8   4   3  345.77   37.20
  -8   4   3  360.66   45.50
   8  -5  -3  -14.10   26.00
   8  -5  -3  -18.60   21.80
   8  -5  -3    8.20   22.60
   8  -5  -3  -11.80   22.10
   8  -5  -3   14.10   25.60
   8  -5  -3   -9.80   23.40
  -8   5   3   15.30   27.00
  -8   5   3    8.10   24.70
  -8   5   3   10.60   24.40
  -8   5   3  -23.30   23.40
   8  -6  -3   90.09   31.90
   8  -6  -3  107.59   28.80
   8  -6  -3  120.59   30.00
   8  -6  -3  125.79   28.40
   8  -6  -3   99.29   30.50
  -8   6   3   96.19   33.70
  -8   6   3   61.59   31.00
  -8   6   3  126.19   32.90
  -8   6   3  106.39   27.70
  -8   6   3   39.60   29.00
  -8   6   3  154.88   35.70
  -8   6   3  159.48   45.70
   9   5  -3  316.27   44.00
   9   5  -3  168.48   48.80
   9   5  -3  205.28   37.10
   9   5  -3  234.78   33.00
   9   5  -3  265.37   35.00
   9   5  -3  302.47   43.90
   9   5  -3  211.18   38.90
  -9  -5   3  262.87   37.70
  -9  -5   3  305.47   32.80
  -9  -5   3  285.57   37.40
  -9  -5   3  322.07   41.00
  -9  -5   3  275.77   40.40
  -9  -5   3  350.36   65.19
   9   4  -3   35.80   25.50
   9   4  -3   70.69   30.40
   9   4  -3   62.69   19.50
   9   4  -3   67.89   32.20
   9   4  -3   48.90   20.90
   9   4  -3   17.80   22.90
  -9  -4   3   85.29   20.80
  -9  -4   3   50.89   22.10
  -9  -4   3   66.69   24.40
  -9  -4   3   52.19   34.00
  -9  -4   3   62.59   23.00
  -9  -4   3   71.69   23.20
   9   3  -3 1309.97   49.80
   9   3  -3 1246.18   45.90
   9   3  -3 1415.56   60.39
   9   3  -3 1332.17   49.40
   9   3  -3 1243.28   58.79
   9   3  -3 1317.27   79.49
  -9  -3   3 1237.18   45.90
  -9  -3   3 1047.60   65.39
  -9  -3   3 1257.27   52.09
  -9  -3   3 1171.28   94.09
  -9  -3   3 1289.97   52.29
  -9  -3   3 1283.37   49.80
   9   2  -3  360.76   33.20
   9   2  -3  347.87   34.70
   9   2  -3  349.77   28.70
   9   2  -3  355.56   29.20
   9   2  -3  331.67   27.40
   9   2  -3  349.57   34.00
   9   2  -3  356.16   39.70
  -9  -2   3  370.26   46.60
  -9  -2   3  382.46   29.90
  -9  -2   3  360.76   31.40
  -9  -2   3  348.47   23.30
  -9  -2   3  351.76   31.60
  -9  -2   3  404.56   31.40
   9   1  -3 2064.39   70.79
   9   1  -3 1986.30   65.99
   9   1  -3 1986.10   67.19
   9   1  -3 2039.00   74.99
   9   1  -3 2024.20   69.89
   9   1  -3 2128.39   65.79
   9   1  -3 2048.00   66.29
  -9  -1   3 2008.50   70.39
  -9  -1   3 2045.50   72.59
  -9  -1   3 2184.08   69.19
[truncated: 1,048,741 more chars]
